# Supplementary material for: Systematic Identification of mRNAs Recruited to Argonaute 2 by Specific microRNAs and Corresponding Changes in Transcript Abundance
Source: PLoS One. 2008 May 7;3(5):e2126. doi: 10.1371/journal.pone.0002126 (PMC2330160; doi:10.1371/journal.pone.0002126)
Supplement: Dataset S1 — Ago2 versus mock, IP and expression HEEBO microarray data (10.08 MB XLS) [file pone.0002126.s004.xls]

## Sheet: key
worksheets:
Ago2_vs_mock_IP_in = Normalized microarray data from Ago2 and mock IPs.
Ago2_vs_mock_IP_out = SAM output
Ago2_vs_mock_EXP_in = Normalized microarray data from Ago2 (3) and mock (3) expression analyses.
Ago2_vs_mock_EXP_out = SAM output
key to SAM output worksheets:
entrez_id = entrez ID
sequence_id = HEEBO probe identifier
description
sam_score = D score from SAM. Similar to t-score.
sam_numerator = log2 of fold change between average Ago2 values and mock values.
sam_denominator = standard deviation plus SAM fudge factor.
fold_change
fdr = q-value from SAM.
local_fdr = local FDR from SAM.

## Sheet: Ago2_vs_mock_IP_in
entrez_ids	sequence_id	description	mock IP (#1)	mock IP (#2)	mock IP (#3)	mock IP (#4)	mock IP (#5)	mock IP (#6)	mock IP (#7)	mock IP (#8)	mock IP (#9)	mock IP (#10)	mock IP (#11)	mock IP (#12)	mock IP (#13)	mock IP (#14)	Ago2 IP (#1)	Ago2 IP (#2)	Ago2 IP (#3)	Ago2 IP (#4)	Ago2 IP (#5)	Ago2 IP (#6)	Ago2 IP (#7)	Ago2 IP (#8)
4494	hSQ002531	|| MT1F || Metallothionein 1F || Hs.513626 || NM_005949 || || 4494 || hHR027031 || 1399947	0.14	0.03	1.03	0.41	0.34	0.28	1.59	1.34	1.76	1.84	1.25	0.48	0.44	1	1.785	1.41	0.67	0.71	-0.25	1.74	0.96	0.94
9043	hSQ029505	|| SPAG9 || Sperm associated antigen 9 || Hs.463439 || NM_003971 || || 9043 || hHR002084 || 1399955	-0.27	-0.07	-1.16	-1.1	-0.42	-0.6	-0.92	-0.77	-1.81	-1.72	-1.87	-0.73	-0.69	-0.44	-0.715	-0.9	-1.38	-0.87	-0.19	-0.17	-0.66	-1.28
4580	hSQ023625	|| MTX1 || Metaxin 1 || Hs.490874 || NM_002455 || || 4580 || hHR024394 || 1399962	0.11	-0.11	-0.43	-0.12	0.13	0.25	-1.43	-1.8	-2.38	-3.87	1.53	0.12	-1.34e-09	1.08	1.635	1.54	1.72	0.89	0.42	1.18	1.46	0.73
144638	hSQ029512	|| || || || AC011595 || || || hHR028216 || 1399981	0.34	0.42	0.03	0.09	0.66	0.58	-0.07	0.1	-0.06	-0.01	-0.28	0.5	0.2	0.56	-0.465	-0.67	-0.42	0.38	0.4	0.64	0.33	0.99
54509	hSQ017448	|| RHOF || Ras homolog gene family, member F (in filopodia) || Hs.524804 || NM_019034 || || 54509 || hHR019557 || 1400060	1.59	1.59	1.09	1.19	1.79	1.5	1.37	1.55	1.67	1.44	1.73	1.07	1.53	0.79	1.235	1.3	0.87	1.08	0.12	0.03	0.98	0.84
391169	hSQ003628	|| || || || XM_372816 || || || hHR025674 || 1400083	1.96	2.02	1.45	1.01	1.25	1.24	2.59	2.8	1.92	1.6	2.14	1.23	1.52	1.12	1.125	1.29	1.02	0.46	0.27	0.23	0.94	0.59
78996	hSQ036219	|| C7orf49 || Chromosome 7 open reading frame 49 || Hs.521213 || NM_024033 || || 78996 || hHR015038 || 1400097	-0.46	-0.29	0.05	-0.33	-0.2	-0.51	0.13	-0.01	0.28	0.53	-0.01	-0.74	-0.06	-0.55	-0.645	-0.7	-1.12	-1.18	-0.14	-0.69	-0.45	0.43
813	hSQ025840	|| CALU || Calumenin || Hs.7753 || NM_001219 || || 813 || hHR018422 || 1400128	0.16	0.27	0.2	0.16	0.26	0.45	-0.22	0.08	0.15	0.45	-0.77	0.23	-0.03	-0.17	0.145	0.25	-0.28	0.09	-0.24	0.17	0.42	0.55
390239	hSQ029725	|| || || || XM_497314 || || || hHR020604 || 1400170	-0.33	-0.36	0.39	0.19	0.72	0.58	1.5	1.03	1.01	0.57	1.17	0.39	0.01	1.34	1.145	1.2	0.29	0.11	-0.48	0.19	0.47	0.75
10147	hSQ045546	|| SFRS14 || Splicing factor, arginine/serine-rich 14 || Hs.515271 || NM_014884 || || 10147 || hHR009664 || 1400192	-1.2	-1.12	-0.86	-1.43	-1.51	-1.43	-1.36	-1.45	-2.15	-1.72	-2.63	-2.13	-0.71	-2.38	-1.735	-1.73	-3.54	-2.47	-1.15	-1.58	-1.45	-1.2
8675	hSQ037783	|| STX16 || Syntaxin 16 || Hs.307913 || NM_001001433 || || 8675 || hHR007332 || 1400310	-2.19	-2.06	-1.7	-2.06	-1.86	-2.25	-1.82	-1.64	-1.67	-1.36	-2.57	-2.96	-1.32	-1.94	-1.375	-1.57	-1.62	-1.69	-1.67	-2.04	-1.23	-1.07
440709	hSQ011333	|| || || || XM_496430 || || || hHR029652 || 1400332	-0.77	-0.96	-0.14	-0.57	0.01	0.01	0.34	0.02	0.54	0.93	-0.24	-0.43	-0.3	-0.11	-0.715	-0.37	-0.53	-0.88	-0.08	-2.68e-09	-0.84	1.33
3832	hSQ038735	|| KIF11 || Kinesin family member 11 || Hs.8878 || NM_004523 || || 3832 || hHR002672 || 1400393	0.03	0.08	-0.36	-0.35	0.34	0.34	-0.49	-0.32	-0.47	-0.42	-1.23	-0.08	0.04	0.63	-0.135	-0.28	-1.02	-0.7	0.35	0.16	-0.31	0.7
26152	hSQ001397	|| ZNF337 || Zinc finger protein 337 || Hs.661684 || NM_015655 || || 26152 || hHR019002 || 1400399	-0.55	-0.57	-0.81	-0.93	-1.03	-0.97	-1.4	-1.4	-1.45	-1.31	-1.68	-1.22	-0.93	-1.23	-1.285	-1.29	-1.1	-1.03	-0.39	-0.22	-0.22	0.47
51078	hSQ038524	|| THAP4 || THAP domain containing 4 || Hs.435759 || NM_015963 || || 51078 || hHR029271 || 1400457	0.17	0.09	0.38	0.42	0.6	0.35	0.65	0.36	0.51	0.51	0.68	-0.29	-0.23	-0.31	-0.325	-0.25	-0.03	-1.28	-0.66	-0.15	0.23	0.44
567	hSQ031865	|| B2M || Beta-2-microglobulin || Hs.693631 || NM_004048 || || 567 || hCM001012 || 1400488	-1.56	-1.45	-1.06	-0.58	-0.51	-1.45	0.23	0.09	0.76	0.81	0.3	0.14	-0.76	1.07	0.065	0.21	0.42	0.11	0.04	0.82	0.05	-0.48
567	hSQ002107	|| B2M || Beta-2-microglobulin || Hs.693631 || NM_004048 || || 567 || hCM001065 || 1400528	-1.57	-1.48	-1.58	-1.19	-1.13	-0.86	0.67	0.37	0.65	1.03	0.29	2.98e-09	-0.37	1.43	0.495	0.5	0.62	0.31	0.4	1.01	0.27	-0.91
387841	hSQ034103	|| hCG_27695 || HCG27695 || Hs.631728 || XM_370681 || || 387841 || hHR030574 || 1400534	-0.23	-0.17	-0.6	-0.8	-0.09	-0.16	1.17	1.3	1.03	1.18	0.65	-0.34	0.15	1	-0.155	-0.08	-1.08	-1.7	-0.35	-0.27	-0.78	-0.21
137107	hSQ027705	|| || || || XM_070233 || || || hHR028823 || 1400552	-0.09	0.13	0.16	-0.31	0.5	0.58	1.31	1.21	0.83	1.28	0.31	0.49	0.72	1.61	0.185	0.02	-0.48	-0.28	0.31	0.4	-0.59	0.27
203411	hSQ042639	|| LOC203411 || Hypothetical protein LOC203411 || Hs.443490 || AK056736 || || 203411 || hHR004170 || 1400554	-0.53	-0.54	-0.7	-0.88	-0.42	-0.14	-0.42	-0.47	0.24	0.2	-0.33	0.15	-0.41	0.6	0.645	0.4	-0.01	0.62	0.63	0.53	0.55	0.11
989	hSQ015305	|| SEPT7 || Septin 7 || Hs.191346 || NM_001011553 || || 989 || hHR029853 || 1400560	0.22	0.39	0.21	-0.05	0.66	0.8	1.87	1.8	0.34	0.57	-0.06	0.06	0.4	0.46	-1.535	-1.21	-1.3	-1.47	-0.28	-0.32	-1.38	-0.11
9810	hSQ019147	|| || || || NM_194352 || || || hHR015726 || 1400563	1.39	1.47	0.99	0.73	1.7	1.25	0.26	0.51	-0.98	-0.83	-0.6	-0.27	0.62	-0.71	0.335	0.16	-0.63	-1.17	-0.12	-0.57	-0.01	-0.12
6836	hSQ022286	|| SURF4 || Surfeit 4 || Hs.512465 || NM_033161 || || 6836 || hHR029955 || 1400593	-0.44	-0.22	0.1	-0.46	0.39	0.3	-0.56	-0.98	-0.48	-0.25	-0.64	-0.61	0.04	-0.42	-0.565	-0.79	-0.09	-0.76	-0.21	-0.54	-0.94	-1.14
400	hSQ034539	|| ARL1 || ADP-ribosylation factor-like 1 || Hs.372616 || NM_001177 || || 400 || hHR015873 || 1400596	-1.76	-1.68	-1.09	-1.28	-1.82	-1.86	-0.95	-0.99	-0.42	-0.3	-1.58	-0.82	-0.44	-1.01	-0.715	-0.72	-0.2	-0.06	0.34	0.02	-0.88	0.87
10807	hSQ021112	|| SDCCAG3 || Serologically defined colon cancer antigen 3 || Hs.94300 || NM_006643 || || 10807 || hHR027686 || 1400658	7.15e-09	0.11	0.45	0.21	-0.37	-0.09	0.38	0.4	0.73	0.79	0.64	-0.83	0.23	-0.9	0.115	0.13	0.3	0.05	0.27	-0.33	0.91	0.5
56252	hSQ035582	|| || || || AL832365 || || || hHR006870 || 1400663	1.1	1.38	0.38	0.07	1.16	1.2	-0.4	-0.35	-0.96	-0.84	-0.83	-0.45	0.78	-0.3	-1.735	-1.81	-4.63	-2.52	-0.79	-1.26	-2.15	-1.08
5306	hSQ029016	|| PITPNA || Phosphatidylinositol transfer protein, alpha || Hs.429819 || NM_006224 || || 5306 || hHR011684 || 1400664	0.99	1.01	0.75	0.58	1.39	1.13	0.55	0.76	0.3	0.07	0.26	0.46	1.02	0.8	-0.405	-0.4	-0.63	-0.65	-0.7	-0.53	-0.18	-0.33
151313	hSQ010255	|| SLC26A1 || Solute carrier family 26 (sulfate transporter), member 1 || Hs.567723 || NM_199336 || || 10861 || hHR029438 || 1400683	-0.3	-0.37	0.28	-0.02	-0.08	-0.22	0.23	0.17	0.13	-0.01	0.17	-0.36	0.01	0.08	-0.705	-0.57	-1.2	-0.93	-0.91	-0.58	-0.08	0.58
84733	hSQ014943	|| CBX2 || Chromobox homolog 2 (Pc class homolog, Drosophila) || Hs.368410 || BG354579 || || 84733 || hHR016888 || 1400692	0.62	0.67	0.82	0.3	0.6	0.69	0.28	0.14	0.01	0.14	0.13	0.1	0.55	-0.32	0.395	0.28	-0.09	-0.04	0.05	-0.04	0.57	1.44
310	hSQ030146	|| ANXA7 || annexin A7 || Hs.631827 || || || 310 || hCT001124 || 1400716	-0.19	-0.28	-0.94	-0.51	-0.21	-0.34	-0.45	-0.41	0.05	-0.28	-0.03	-0.06	0.23	0.15	-0.345	-0.27	0.59	0.34	0.41	0.92	0.86	0.83
5090	hSQ007148	|| PBX3 || Pre-B-cell leukemia homeobox 3 || Hs.428027 || NM_006195 || || 5090 || hHR004298 || 1400728	0.65	0.82	0.59	1.04	1.39	1.21	-0.18	-0.21	0.7	0.92	0.06	1	0.18	0.75	-0.005	-0.17	0.14	0.81	0.4	0.75	0.53	1.08
4673	hSQ022717	|| NAP1L1 || Nucleosome assembly protein 1-like 1 || Hs.524599 || NM_139207 || || 4673 || hHR028893 || 1400741	0.13	0.36	0.13	-0.17	0.59	0.67	0.67	0.54	0.1	0.26	-0.59	0.28	0.17	0.89	-2.475	-1.99	-2.36	-1.97	-1.11	-1.07	-2.26	-0.82
10477	hSQ032258	|| UBE2E3 || Ubiquitin-conjugating enzyme E2E 3 (UBC4/5 homolog, yeast) || Hs.470804 || NM_006357 || || 10477 || hHR028340 || 1400786	-0.04	0.17	0.04	-0.29	0.17	0.38	1.42	1.17	1.06	1.1	0.42	0.12	0.53	0.98	0.905	0.92	1.29	0.84	0.95	0.72	0.5	-0.09
341457	hSQ005662	|| || || || XM_292085 || || || hHR030144 || 1400812	-0.57	-0.53	0.34	-0.21	0.19	0.35	0.79	0.73	1	1.38	0.76	0.2	0.13	0.93	0.395	0.79	0.66	0.54	0.29	0.89	0.87	2.36
442232	hSQ038232	|| || || || XM_498115 || || || hHR027783 || 1400849	1.22	1.41	1.19	0.43	1.68	1.94	2.35	1.74	1.77	2.41	0.97	1.47	1.86	2.98	-1.245	-1.28	-2.45	-1.63	-0.45	0.43	-2.33	-0.58
7155	hSQ032119	|| TOP2B || Topoisomerase (DNA) II beta 180kDa || Hs.475733 || NM_001068 || || 7155 || hHR006107 || 1400946	0.82	1.03	0.58	0.13	0.55	0.54	-0.53	-0.41	0.3	0.32	-0.29	-0.26	0.41	0.39	-1.385	-1.49	-1.55	-1.48	-0.76	-0.98	-1.03	-0.75
10776	hSQ009020	|| ARPP-19 || Cyclic AMP phosphoprotein, 19 kD || Hs.512908 || NM_006628 || || 10776 || hHR028428 || 1400988	-0.7	-0.64	-0.01	-0.38	-0.61	-0.3	-0.16	-0.08	0.42	0.46	-0.43	-0.55	-0.15	-0.25	0.535	0.25	0.61	0.49	0.45	0.09	0.81	1.01
388363	hSQ043990	|| || || || NC_000017 || || || hHR030440 || 1401072	-1.89	-1.36	0.14	-1.17	-0.39	-0.19	-0.01	-0.26	-0.52	0.43	-1.1	-0.56	-0.51	1.45	-0.205	-0.49	-0.23	-0.69	0.98	0.59	-1.95	0.12
2339	hSQ035118	|| FNTA || Farnesyltransferase, CAAX box, alpha || Hs.370312 || NM_002027 || || 2339 || hHR029699 || 1401084	-1.06	-1	-0.99	-1.29	-1.18	-1.38	-0.66	-0.4	-0.17	0.1	-0.49	-0.57	-0.13	-0.22	0.275	0.35	0.52	0.58	1.12	0.69	0.59	1.9
567	hSQ008746	|| B2M || Beta-2-microglobulin || Hs.693631 || NM_004048 || || 567 || hCM001035 || 1401240	-1.34	-1.56	-0.4	-1.23	-0.65	-0.84	0.07	-0.06	0.53	0.98	0.08	2.98e-09	-0.72	1.02	-0.265	-0.15	0.12	0.05	-0.07	0.97	-0.13	-0.4
144871	hSQ024418	|| LOC144871 || Hypothetical protein LOC144871 || Hs.59214 || AK024941 || || 144871 || hHR005490 || 1401241	-0.55	-0.42	-1.12	-0.92	-0.93	-0.78	0.19	0.54	-0.19	-0.19	-0.91	-0.63	0.01	-0.6	0.675	0.28	-0.08	0.27	0.26	-0.38	-0.43	0.1
401904	hSQ001591	|| LOC401904 || Similar to 60S ribosomal protein L23a || Hs.590999 || XM_377521 || || 401904 || hHR028778 || 1401262	1.15	1.34	1.47	0.84	1.68	1.92	2.31	2.28	1.16	1.91	1.21	1.45	1.18	1.94	-0.615	-0.59	-1.8	-1.26	-0.68	-0.06	-2.05	-0.38
9797	hSQ028841	|| TATDN2 || TatD DNase domain containing 2 || Hs.475401 || D86972 || || 9797 || hHR019196 || 1401317	0.12	0.24	0.29	-0.06	0.49	0.44	-0.71	-0.15	-0.27	-0.47	-0.59	-0.36	0.38	-0.25	0.165	-0.05	0.09	-6.71e-10	0.2	-0.06	0.32	0.74
375133	hSQ006622	|| LOC220686 || Hypothetical protein LOC220686 || Hs.448225 || NM_199345 || || 220686 || hHR032094 || 1401358	0.92	0.79	-0.13	-0.75	0.25	-0.04	0.27	0.47	-0.5	-0.63	0.82	-0.95	-1.29	-0.05	-0.385	-0.51	-1.39	-1.29	-2.09	-2.11	-0.03	-1.94
1662	hSQ021291	|| DDX10 || DEAD (Asp-Glu-Ala-Asp) box polypeptide 10 || Hs.591931 || NM_004398 || || 1662 || hHR027627 || 1401366	0.8	0.79	0.68	0.27	0.96	1.18	1.05	1.02	-0.64	-0.58	-0.53	-0.32	0.4	-0.24	-0.975	-1.07	-1.66	-1.61	-0.86	-0.77	-1.05	-0.96
6233	hSQ032939	|| RPS27A || Ribosomal protein S27a || Hs.546292 || NM_002954 || || 6233 || hHR030705 || 1401462	-0.57	-0.28	1.23	0.28	0.54	0.57	1.19	0.69	0.72	1.06	-0.27	0.14	0.27	1.71	-0.055	0.09	-0.33	-0.46	0.98	1.08	-0.84	1.39
10163	hSQ024043	|| WASF2 || WAS protein family, member 2 || Hs.590909 || NM_006990 || || 10163 || hHR029995 || 1401492	1.76	1.71	1.41	1.16	1.66	1.54	0.56	0.22	0.13	-0.08	0.55	0.24	0.64	-0.69	-0.465	-0.63	-0.67	0.23	-0.62	-1.14	0.05	-0.46
9479	hSQ042386	|| MAPK8IP1 || Mitogen-activated protein kinase 8 interacting protein 1 || Hs.234249 || NM_005456 || || 9479 || hHR030806 || 1401498	2.01	1.99	1.78	1.24	1.4	1.17	0.89	1.19	0.64	0.7	1.28	0.35	-0.16	-0.71	0.705	0.59	0.68	0.15	-0.31	0.15	1.27	0.64
80700	hSQ006758	|| UBXD1 || UBX domain containing 1 || Hs.435255 || NM_025241 || || 80700 || hHR021432 || 1401512	0.36	0.34	0.35	-0.29	-0.12	0.01	1.57	1.45	0.75	-0.44	1.53	-0.57	0.17	0.54	0.235	0.76	-0.19	-1.18	-0.54	-0.93	0.73	-1.32
10914	hSQ000081	|| PAPOLA || Poly(A) polymerase alpha || Hs.253726 || NM_032632 || || 10914 || hHR021633 || 1401549	0.9	0.93	-1.17	-0.39	0.87	0.86	-0.07	-0.1	0.38	-0.53	0.45	1.02	0.35	1.57	-0.295	-0.28	0.46	1.13	0.69	0.86	0.94	-0.06
114135	hSQ040747	|| || || || AL133616 || || || hHR007008 || 1401563	-1.45	-1.27	-1.16	-1.61	-1.69	-1.3	-0.12	0.11	-0.79	-0.53	-2.16	-1.31	-0.3	-1.55	-1.925	-2.1	-2.89	-2.42	-1.05	-1.13	-2.24	-0.96
441531	hSQ015257	|| || || || XM_497185 || || || hHR031433 || 1401602	7.15e-09	0.15	0.55	-0.08	0.7	1.07	0.72	0.7	0.57	0.63	0.38	0.03	0.49	1.08	0.875	0.98	0.73	0.36	0.59	0.65	0.19	0.09
401317	hSQ022108	|| LOC401317 || Hypothetical LOC401317 || Hs.663802 || XM_379479 || || 401317 || hHR013704 || 1401608	0.15	0.05	0.85	0.49	0.57	0.35	0.66	0.58	1.32	1.39	1.23	0.16	0.44	0.76	1.775	1.56	1.33	0.93	0.67	0.77	1.71	2.31
5869	hSQ042999	|| RAB5B || RAB5B, member RAS oncogene family || Hs.567328 || NM_002868 || || 5869 || hHR027264 || 1401696	2.04	2.04	2.21	1.48	1.82	2.1	2.15	2.25	1.53	1.6	1.41	0.94	1.24	0.43	1.065	1.3	0.79	0.7	0.26	0.49	0.66	2.06
8835	hSQ025586	|| SOCS2 || Suppressor of cytokine signaling 2 || Hs.485572 || NM_003877 || || 8835 || hHR017472 || 1401713	0.28	0.39	0.38	0.22	0.5	0.76	0.24	0.45	0.76	0.95	-0.01	0.42	0.41	0.65	0.655	0.84	1.43	1.15	1.03	1.21	1.55	1.23
6389	hSQ017849	|| SDHA || Succinate dehydrogenase complex, subunit A, flavoprotein (Fp) || Hs.440475 || NM_004168 || || 6389 || hCM000907 || 1401765	0.11	0.17	-0.27	-0.58	-0.63	-0.9	0.23	0.54	0.01	0.31	0.09	-0.64	0.41	-0.37	-0.875	-0.89	-0.83	-0.49	0.62	0.48	0.08	0.39
9057	hSQ045472	|| SLC7A6 || Solute carrier family 7 (cationic amino acid transporter, y+ system), member 6 || Hs.653193 || D87432 || || 9057 || hHR007343 || 1401813	-0.81	-0.77	-0.53	-0.87	-0.39	-0.15	-0.65	-0.49	-0.39	-0.3	-0.87	-1.03	-0.41	-0.53	-0.065	-0.09	-0.4	0.09	-0.28	-0.2	0.31	0.08
196074	hSQ000834	|| METT5D1 || Methyltransferase 5 domain containing 1 || Hs.243326 || NM_152636 || || 196074 || hHR027996 || 1401845	-1.95	-1.95	-1.06	-1.23	-1.73	-1.63	-1.44	-1.54	-1.21	-0.99	-2.12	-1.1	-0.78	-1.83	0.105	-0.15	-0.13	-0.36	0.36	0.15	-0.39	0.79
25776	hSQ041019	|| CBY1 || Chibby homolog 1 (Drosophila) || Hs.334911 || NM_015373 || || 25776 || hHR012263 || 1401851	0.28	0.2	0.58	0.28	0.3	0.08	-0.02	0.22	0.38	0.45	-0.08	-0.58	0.16	0.07	0.115	0.15	-0.5	0.07	0.5	0.47	0.68	1.46
284119	hSQ039622	|| PTRF || Polymerase I and transcript release factor || Hs.437191 || NM_012232 || || 284119 || hHR020774 || 1401865	0.61	0.71	0.5	0.06	0.38	0.02	0.44	0.58	0.08	-0.07	0.17	-0.89	0.69	-1.15	0.205	-0.32	-0.15	-0.83	-0.53	-1.27	0.67	-1.22
9482	hSQ009850	|| STX8 || Syntaxin 8 || Hs.431109 || NM_004853 || || 9482 || hHR014474 || 1401930	1.16	1.23	1.03	0.78	1.11	0.64	2.22	2.64	1.5	1.79	1.59	1.73	1.5	1.12	-0.375	-0.27	-0.96	-0.74	-0.35	0.16	-0.77	0.94
10626	hSQ003026	|| TRIM16 || Tripartite motif-containing 16 || Hs.123534 || NM_006470 || || 10626 || hHR031090 || 1401950	-0.81	-0.52	0.28	-0.06	-0.08	-0.07	-1.04	-0.9	-0.71	-0.56	-1.05	-0.86	-0.05	-0.73	-0.995	-0.52	-0.99	-1.23	-0.46	-0.71	-0.48	-0.32
3145	hSQ040265	|| HMBS || Hydroxymethylbilane synthase || Hs.82609 || NM_000190 || || 3145 || hCM001005 || 1401987	-0.28	-0.23	-0.23	-0.2	-0.15	-0.16	1	0.9	0.8	0.68	0.75	-0.53	0.12	0.68	0.795	0.83	0.71	0.25	-0.04	0.06	1.06	0.62
6867	hSQ024712	|| TACC1 || Transforming, acidic coiled-coil containing protein 1 || Hs.279245 || NM_006283 || || 6867 || hHR005362 || 1401989	-0.09	-0.06	-0.23	-0.68	-0.09	0.3	-0.19	-0.14	-0.79	-1.1	-1.37	-0.8	-0.28	-0.85	0.415	0.05	5.96e-10	0.01	0.12	-0.03	0.55	0.31
342994	hSQ013774	|| || || || XM_292836 || || || hHR028171 || 1402074	-1.62	-1.52	-1.05	-1.52	-1.14	-0.92	0.48	0.18	0.43	0.6	-0.46	-0.7	-0.69	0.71	-0.115	-0.08	-0.74	-0.73	0.17	0.26	-1.04	0.71
6391	hSQ044398	|| SDHC || Succinate dehydrogenase complex, subunit C, integral membrane protein, 15kDa || Hs.444472 || NM_003001 || || 6391 || hHR029944 || 1402097	-0.39	-0.75	-0.56	-0.92	-0.42	-0.5	-1.62	-0.26	-1.05	-0.96	0.11	-0.36	-0.69	-0.22	-0.785	-0.75	-0.98	-1.3	-1.92	-0.22	-0.68	-0.44
9232	hSQ038927	|| PTTG1 || Pituitary tumor-transforming 1 || Hs.350966 || NM_004219 || || 9232 || hHR027560 || 1402122	-0.44	-0.31	0.42	0.09	0.25	1.15	2	1.84	1.49	1.55	1.35	0.67	1.31	1.55	0.825	0.7	0.46	0.13	0.33	0.22	-0.34	0.89
26273	hSQ026378	|| FBXO3 || F-box protein 3 || Hs.406787 || NM_012175 || || 26273 || hHR006727 || 1402127	-1.04	-0.42	-1.03	-0.86	-0.23	0.3	0.08	0.43	-0.45	0.3	-0.34	-0.03	-0.41	0.5	-0.185	-0.18	0.14	0.09	0.56	0.66	-0.81	0.17
54812	hSQ021953	|| AFTPH || Aftiphilin || Hs.655167 || NM_017657 || || 54812 || hHR011691 || 1402174	-1.03	-0.94	-0.54	-0.8	-0.56	-0.46	-0.82	-1.13	-0.92	-0.6	-1.64	-0.71	-0.69	-0.87	0.435	0.33	0.65	0.6	0.72	0.76	0.2	0.75
3191	hSQ042598	|| HNRPL || Heterogeneous nuclear ribonucleoprotein L || Hs.654559 || NM_001533 || || 3191 || hHR029428 || 1402186	0.54	0.48	1.01	0.46	0.08	0.1	0.76	0.98	0.27	0.62	-0.31	-0.52	0.16	-0.8	0.395	0.55	-0.03	-0.16	0.19	-0.23	-0.11	2.34
1859	hSQ025015	|| DYRK1A || Dual-specificity tyrosine-(Y)-phosphorylation regulated kinase 1A || Hs.693642 || NM_130436 || || 1859 || hHR002013 || 1402207	-0.44	-0.13	-0.24	-0.44	-0.21	-0.15	-0.54	-0.54	-0.75	-0.79	-0.95	-0.48	-0.11	-0.12	1.235	0.98	0.85	0.87	1.34	1.12	1.26	0.87
567	hSQ002550	|| B2M || Beta-2-microglobulin || Hs.693631 || NM_004048 || || 567 || hCM001114 || 1402225	-1.31	-1.49	-1.4	-1.18	-0.81	-0.73	0.57	0.15	0.88	0.86	0.11	0.21	-0.37	1.52	0.055	0.53	0.56	-0.27	0.13	1.04	0.24	-0.27
51108	hSQ045373	|| METTL9 || Methyltransferase like 9 || Hs.279583 || NM_016025 || || 51108 || hHR005662 || 1402226	-0.81	-0.72	-0.24	-0.23	-0.19	-0.27	-0.9	-0.76	0.05	0.2	-1.07	-0.28	0.08	-0.24	-1.165	-1.01	-1.28	-1.11	-0.46	-0.67	-1.25	0.84
114883	hSQ044483	|| OSBPL9 || Oxysterol binding protein-like 9 || Hs.21938 || NM_148909 || || 114883 || hHR002198 || 1402245	-0.71	-0.57	-0.3	-0.33	-0.07	0.02	-0.34	-0.3	-0.3	-0.11	-0.51	-0.31	-0.46	-0.51	-0.615	-1.05	-1	-0.12	0.02	0.03	-0.64	0.75
4869	hSQ005544	|| NPM1 || Nucleophosmin (nucleolar phosphoprotein B23, numatrin) || Hs.557550 || NM_002520 || || 4869 || hHR030751 || 1402264	0.71	1.03	0.32	-0.48	0.8	0.8	2.57	2.33	1.1	1.26	0.63	0.93	1.8	1.01	-1.725	-1.66	-2.3	-2.28	-0.54	-0.58	-2.65	0.32
439992	hSQ039475	|| LOC439992 || Similar to ribosomal protein S3a || Hs.447714 || XM_495839 || || 439992 || hHR027767 || 1402362	-0.02	0.17	-0.71	-1.27	0.05	0.38	1.04	0.83	0.67	1.03	0.48	0.49	0.64	2.11	-0.715	-0.71	-0.92	-0.78	0.13	0.67	-0.82	-0.81
6636	hSQ001274	|| SNRPF || Small nuclear ribonucleoprotein polypeptide F || Hs.105465 || NM_003095 || || 6636 || hHR020455 || 1402408	-1.07	-1.11	-1.1	-1.65	-0.8	-1.19	0.3	0.18	0.31	0.42	-0.15	-0.78	-0.23	-0.9	-0.875	-0.97	-1.26	-1.72	-0.61	-0.47	-1.19	0.07
55173	hSQ023061	|| MRPS10 || Mitochondrial ribosomal protein S10 || Hs.380887 || NM_018141 || || 55173 || hHR029604 || 1402417	-0.84	-0.64	-0.29	-0.56	-0.46	-0.39	-0.32	-0.16	0.25	0.32	-0.5	-0.65	-1.34e-09	0.54	0.905	0.69	0.82	0.58	0.75	0.53	0.62	1.41
310	hSQ043471	|| ANXA7 || annexin A7 || Hs.631827 || || || 310 || hCT001250 || 1402455	-0.07	-0.27	-1.09	-0.64	-0.26	-0.33	-0.3	-0.3	0.32	-0.05	0.34	0.13	0.22	0.06	-0.285	-0.33	0.77	0.36	0.48	0.74	0.78	0.52
389308	hSQ013589	|| || || || XM_371758 || || || hHR026632 || 1402504	0.98	0.95	0.01	0.11	0.68	0.54	1.8	1.99	1.92	1.79	1.76	1.05	0.88	1.56	0.675	0.61	0.5	0.1	0.16	0.8	0.42	0.26
51009	hSQ009819	|| DERL2 || Der1-like domain family, member 2 || Hs.286131 || NM_016041 || || 51009 || hHR021893 || 1402535	-0.48	-0.54	-0.58	-0.95	-0.62	-0.54	0.69	0.61	0.85	0.75	0.65	0.14	0.16	0.76	1.845	1.78	2.15	1.56	1.17	0.92	1.35	0.99
389749	hSQ035894	|| || || || XM_372114 || || || hHR028601 || 1402567	1.61	1.7	0.56	0.58	1.3	1.04	-0.34	-0.27	-0.02	0.01	0.26	0.99	1	0.47	-0.705	-0.81	-0.76	-0.31	-0.07	0.48	0.21	-0.62
442342	hSQ030512	|| || || || || || || hHR019959 || 1402569	-0.38	-0.52	-0.57	-0.29	-0.12	-0.11	-0.51	-0.89	-0.39	-2.13	0.04	-0.01	0.23	0.29	-0.965	-0.86	-1.18	-1.37	-0.43	0.67	-0.57	1.14
5326	hSQ006868	|| PLAGL2 || Pleiomorphic adenoma gene-like 2 || Hs.154104 || NM_002657 || || 5326 || hHR027376 || 1402669	2.17	2.01	1.49	0.68	0.82	1.23	0.12	-0.34	-0.22	-0.56	1.4	0.79	0.83	-0.09	0.535	0.44	0.72	0.56	-0.16	0.29	0.63	0.24
389953	hSQ016023	|| || || || XM_372310 || || || hHR031029 || 1402677	0.9	1.02	0.46	7.15e-09	0.53	0.61	2.61	2.44	1.17	1.36	0.83	0.5	1.76	0.16	-1.155	-0.95	-1.51	-1.57	-0.33	-0.35	-1.45	-0.66
11222	hSQ029019	|| MRPL3 || Mitochondrial ribosomal protein L3 || Hs.205163 || NM_007208 || || 11222 || hHR022130 || 1402729	-1.15	-0.83	-0.46	-0.93	-0.43	-0.61	0.08	-0.23	0.39	0.65	-0.42	-0.1	-0.19	0.07	-0.315	-0.21	-0.21	-0.3	0.48	0.42	-0.47	0.97
64282	hSQ012035	|| || || || NM_022447 || || || hHR001747 || 1402738	-0.84	-0.55	-0.9	-1.02	-0.97	-1.1	-1.02	-1.51	-1.41	-1.69	-1.43	-0.7	-0.7	-1.99	0.005	0.04	0.06	0.14	0.26	-0.42	-1.03	-0.88
3178	hSQ009908	|| HNRPA1 || Heterogeneous nuclear ribonucleoprotein A1 || Hs.693600 || NM_031157 || || 3178 || hHR030526 || 1402766	-1.54	-1.21	0.09	-0.8	-0.58	-0.31	-0.91	-1.31	-0.8	-0.37	-2.13	-1.15	-0.02	-0.86	-2.745	-2.68	-3.54	-3.09	-0.83	-0.97	-3.42	-0.7
360132	hSQ033287	|| FKBP9L || FK506 binding protein 9-like || Hs.446691 || NM_182827 || || 360132 || hHR030616 || 1402803	-0.19	-0.12	0.25	-0.06	-0.19	-0.07	-1.17	-0.91	-0.8	-0.34	-1.29	-0.79	0.2	-1.47	-1.675	-1.57	-1.78	-1.28	-0.75	-0.73	-1.42	-0.54
11182	hSQ020097	|| SLC2A6 || Solute carrier family 2 (facilitated glucose transporter), member 6 || Hs.244378 || NM_017585 || || 11182 || hHR031785 || 1402815	-0.52	-0.38	-0.36	-0.71	-0.26	0.13	0.62	0.64	-0.22	-0.48	0.42	-0.76	-1.34e-09	-0.32	1.375	1.31	1.19	0.26	0.07	-0.91	1.18	-0.43
26826	hSQ023003	|| || || || K03099 || || || hHR029876 || 1402822	-1.21	-1.4	-0.67	-0.81	-0.3	0.08	0.73	0.37	0.21	0.02	0.77	0.2	-0.48	0.97	0.925	0.65	1.87	1.45	1.41	1.6	1.05	0.86
2145	hSQ000156	|| EZH1 || Enhancer of zeste homolog 1 (Drosophila) || Hs.194669 || NM_001991 || || 2145 || hHR015786 || 1402824	-0.78	-0.84	-1.33	-1.64	-1.77	-1.57	-1.59	-1.36	-2.45	-2.4	-1.14	-2.71	-1.92	-2.75	-0.735	-0.82	-1.34	-1.2	-0.5	-1.17	-0.47	-0.29
7027	hSQ045209	|| TFDP1 || Transcription factor Dp-1 || Hs.79353 || NM_007111 || || 7027 || hHR029381 || 1402915	1.06	1.04	0.07	0.14	0.57	0.88	1.65	1.83	1.34	1.17	0.6	-0.12	0.8	0.3	-0.675	-0.72	-0.71	-0.78	-0.76	-0.78	-0.51	-1.65
83857	hSQ026799	|| || || || NM_194311 || || || hHR010320 || 1402919	-0.78	-0.65	-0.37	-0.85	-0.45	-0.67	-0.79	-0.88	-0.24	-0.3	-1.22	-0.72	-0.69	-0.68	-0.095	-0.33	0.1	0.23	0.13	-0.29	-0.05	-0.87
1452	hSQ026696	|| || || || NM_018548 || || || hHR009322 || 1402965	-1.65	-1.61	-1.32	-1.27	-1.59	-1.11	-2.4	-1.75	-1.26	-1.13	-2.12	-1.72	-0.63	-3.1	-1.535	-1.69	-2.36	-1.54	-0.61	-0.94	-1.67	-0.92
90102	hSQ012602	|| PHLDB2 || Pleckstrin homology-like domain, family B, member 2 || Hs.477114 || NM_145753 || || 90102 || hHR004425 || 1402999	-0.01	0.29	-0.82	-0.7	-0.53	-0.09	0.66	0.57	-0.3	-0.33	-0.76	-0.21	0.07	0.51	0.055	-0.08	-0.34	-0.26	0.16	-0.43	-0.4	-0.79
441518	hSQ021940	|| || || || XM_497160 || || || hHR027716 || 1403072	0.22	0.15	0.45	0.02	0.58	0.57	1.36	1.14	0.76	0.67	0.74	-0.33	0.72	0.67	1.025	1.34	1.04	0.31	0.22	0.24	0.93	1.78
387590	hSQ016038	|| psiTPTE22 || TPTE pseudogene || Hs.474116 || AK097082 || || 387590 || hHR030187 || 1403075	3.39	3.23	2.76	2.19	2.2	2.59	3.56	3.83	2.85	2.91	2.48	2.08	2.89	1	2.235	2.15	1.5	1.11	0.68	0.34	0.91	2.08
10189	hSQ012876	|| THOC4 || THO complex 4 || Hs.534385 || NM_005782 || || 10189 || hHR029469 || 1403093	-0.63	-0.69	-0.07	-0.47	-0.36	-0.26	0.29	0.46	0.02	0.35	0.38	-0.85	-0.12	-0.19	-0.705	-0.22	-0.91	-1.57	-0.67	-0.19	0.74	1.33
4215	hSQ038394	|| MAP3K3 || Mitogen-activated protein kinase kinase kinase 3 || Hs.29282 || NM_203351 || || 4215 || hHR018564 || 1403145	0.63	0.71	0.09	-0.47	0.53	0.37	0.18	0.35	-0.54	-0.56	-0.24	-0.51	0.25	-0.94	1.125	0.8	1.1	0.55	0.44	-0.08	0.79	-0.17
5885	hSQ006149	|| RAD21 || RAD21 homolog (S. pombe) || Hs.81848 || NM_006265 || || 5885 || hHR026486 || 1403172	-0.69	-0.22	-0.92	-0.07	-0.65	-1.16	-2.38	-3.65	-1.65	-1.54	-1.47	0.09	-1.49	-1.29	-3.095	-3.18	-2.27	-0.89	-1.02	-0.4	-1.83	-1.83
8570	hSQ000339	|| KHSRP || KH-type splicing regulatory protein (FUSE binding protein 2) || Hs.91142 || NM_003685 || || 8570 || hHR009624 || 1403176	1.88	1.96	1.36	0.58	0.55	0.4	0.53	0.64	0.17	0.28	-0.27	-0.59	0.42	-0.62	0.445	0.24	-0.54	-0.77	-0.24	-1.14	-0.8	-0.7
310	hSQ023485	|| ANXA7 || annexin A7 || Hs.631827 || || || 310 || hCT001277 || 1403188	0.17	5.96e-09	-0.51	-0.52	0.02	-0.34	-1.41	-1.36	-0.66	-1.48	0.42	0.33	0.3	0.1	-0.725	-0.85	0.87	0.44	0.48	1.09	1.28	0.7
9711	hSQ026439	|| KIAA0226 || KIAA0226 || Hs.478868 || D86979 || || 9711 || hHR006190 || 1403189	-0.86	-0.74	-1.01	-1.07	-1.09	-0.66	-0.72	-0.81	-1.19	-1.41	-1.41	-1.13	-0.16	-2.27	-0.155	-0.2	-0.01	-0.3	0.3	-0.48	0.03	-0.35
92379	hSQ045277	|| || || || NM_152283 || || || hHR001459 || 1403217	-1.09	-1.02	-1.35	-1.26	-1.07	-1.24	-0.44	-0.16	-0.17	-0.25	-0.71	-0.82	-0.12	-0.53	-1.175	-0.87	-1.15	-1.27	-0.03	-0.15	-1.14	0.22
285961	hSQ033886	|| RP11-291L22.2 || Similar to cell division cycle 10 || Hs.406568 || BC042387 || || 285961 || hHR028452 || 1403224	0.12	0.26	-0.04	-0.08	0.38	0.08	-0.25	-1.4	-0.81	-1.55	-0.1	0.11	-0.25	-0.1	-0.535	-0.32	0.77	0.11	-0.12	0.13	0.1	-1.3
3145	hSQ037551	|| HMBS || Hydroxymethylbilane synthase || Hs.82609 || NM_000190 || || 3145 || hCM000900 || 1403245	0.05	-0.13	0.21	-0.15	0.23	0.21	0.69	0.71	0.76	0.75	0.81	-0.53	-0.04	0.77	0.725	0.66	0.52	0.19	0.05	0.09	1.38	0.71
221092	hSQ034144	|| || || || AK122942 || || || hHR022005 || 1403277	1.22	1.08	0.73	0.47	0.48	1.03	1.04	0.88	0.88	0.88	1.27	0.39	0.91	0.72	2.405	2.05	1.89	1.37	0.87	0.57	1.81	2.16
153914	hSQ000586	|| PEX3 || Peroxisomal biogenesis factor 3 || Hs.7277 || AK023593 || || 8504 || hHR024881 || 1403355	-0.09	-0.11	-0.27	-0.59	-0.09	-0.29	0.44	0.44	0.45	0.51	0.33	-0.31	0.37	-0.02	-0.035	-0.29	0.25	0.37	0.31	0.29	-0.54	-0.01
124685	hSQ018913	|| || || || XM_064265 || || || hHR023420 || 1403380	-0.16	-0.06	0.33	0.16	0.57	0.82	1.4	1.52	0.9	1.05	0.97	0.24	0.52	1.73	0.155	0.27	-0.84	-1.34	-0.57	0.29	-0.52	0.38
10523	hSQ043110	|| CHERP || Calcium homeostasis endoplasmic reticulum protein || Hs.631627 || NM_006387 || || 10523 || hHR011442 || 1403426	1.84	1.96	0.58	0.42	0.93	1.31	0.55	0.56	-0.62	-0.73	-0.12	-0.23	0.59	-0.3	0.195	0.1	-0.47	-0.95	0.08	-0.86	-0.44	-1.37
11083	hSQ016229	|| DIDO1 || Death inducer-obliterator 1 || Hs.517172 || NM_022105 || || 11083 || hHR013236 || 1403432	0.08	0.15	0.09	-0.15	0.15	0.28	0.07	-0.09	-1.12	-1.05	-1.05	-0.81	-0.31	-1.46	-1.075	-1.22	-1.09	-1.03	-0.68	-0.88	-0.29	-1.1
64342	hSQ027384	|| HS1BP3 || HCLS1 binding protein 3 || Hs.531785 || NM_022460 || || 64342 || hHR016519 || 1403443	0.78	0.68	0.66	0.54	0.31	0.32	1.05	1.03	0.43	0.05	0.93	-0.46	0.51	0.24	0.915	0.77	0.38	-0.19	0.29	-0.65	1.02	-0.58
339352	hSQ033347	|| || || || XM_294910 || || || hHR026888 || 1403474	0.36	0.1	1.39	0.94	0.01	0.45	1.31	0.73	0.39	-2.54	1.86	0.31	0.13	0.9	3.175	2.95	2.91	2.16	0.93	1.19	2.62	1.64
285176	hSQ015916	|| LOC285176 || Similar to ribosomal protein L10 || Hs.567817 || XM_209500 || || 285176 || hHR028724 || 1403492	-0.19	-0.04	0.52	-0.2	0.25	0.39	1.35	1.1	0.87	1.2	0.66	-0.16	0.24	1.33	1.365	1.16	1.12	0.72	0.86	0.64	0.85	0.99
23160	hSQ015591	|| WDR43 || WD repeat domain 43 || Hs.169863 || D26488 || || 23160 || hHR008999 || 1403497	-0.44	-0.14	-0.15	-0.49	0.54	0.54	-0.44	-0.47	-1.25	-1.12	-1.29	-0.27	-0.28	0.62	-0.565	-0.42	-0.38	-0.49	0.05	-0.36	-0.24	1.17
6152	hSQ024806	|| RPL24 || Ribosomal protein L24 || Hs.477028 || NM_000986 || || 6152 || hHR031293 || 1403650	-0.2	-0.11	-0.21	-0.55	0.37	0.37	1.25	1.07	0.71	0.83	0.74	0.4	0.49	1.41	-1.475	-1.32	-2.2	-2.68	-0.67	-0.3	-2	0.11
83746	hSQ026751	|| L3MBTL2 || L(3)mbt-like 2 (Drosophila) || Hs.517641 || NM_031488 || || 83746 || hHR013500 || 1403653	0.19	0.3	0.34	-0.06	0.26	0.21	-0.35	-0.34	-0.4	-0.37	-0.56	-0.71	0.15	-0.65	-0.405	-0.38	-0.68	-0.35	0.02	-0.08	0.25	0.95
10449	hSQ004264	|| ACAA2 || Acetyl-Coenzyme A acyltransferase 2 (mitochondrial 3-oxoacyl-Coenzyme A thiolase) || Hs.200136 || NM_006111 || || 10449 || hHR026315 || 1403718	7.15e-09	-0.01	-0.36	-0.54	-0.15	-0.3	0.72	0.6	0.83	0.93	0.32	0.3	0.95	0.33	-0.375	-0.63	-0.22	-0.24	0.48	0.48	-0.41	0.74
3800	hSQ005322	|| KIF5C || Kinesin family member 5C || Hs.660699 || AB011103 || || 3800 || hHR012695 || 1403746	-0.23	-0.03	-1.11	-1.03	-0.52	-0.55	0.26	0.42	-0.34	-0.2	-1.31	-0.73	-0.3	-0.77	-0.125	-0.42	-0.47	-0.05	0.27	-0.46	-0.87	-0.5
56900	hSQ011177	|| C1orf119 || Chromosome 1 open reading frame 119 || Hs.82933 || NM_020141 || || 56900 || hHR030024 || 1403759	-1.01	-0.66	0.02	-0.37	-0.3	-0.34	-0.7	-0.78	0.16	0.37	-0.64	-0.38	-0.07	-0.04	1.065	0.93	1.58	1.31	1.33	1.18	1.19	1.99
2970	hSQ028367	|| GTF2IP1 || General transcription factor II, i, pseudogene 1 || Hs.654705 || BC045632 || || 2970 || hHR030117 || 1403795	-0.63	-0.28	-1.09	-1.24	0.1	0.2	-0.48	-0.44	-1.32	-1.14	-1.29	-0.95	-0.01	-0.13	-2.405	-2.12	-2.84	-2.61	-0.96	-1.13	-2.34	-0.99
3145	hSQ017037	|| HMBS || Hydroxymethylbilane synthase || Hs.82609 || NM_000190 || || 3145 || hCM000878 || 1403829	0.31	-0.14	-0.18	-0.21	-0.05	-0.4	0.8	0.82	0.8	0.65	0.84	-0.46	-0.11	0.51	0.795	0.53	0.72	0.11	-0.04	-0.17	0.97	0.05
283491	hSQ008649	|| OR7E156P || Olfactory receptor, family 7, subfamily E, member 156 pseudogene || Hs.363054 || AK097469 || || 283491 || hHR031576 || 1403913	0.85	0.74	1.04	0.94	1.15	0.99	1.33	1.33	1.81	2.09	1.12	1.04	0.57	0.84	2.055	1.97	1.3	0.96	0.36	0.5	1.38	1.94
55148	hSQ033928	|| C14orf130 || Chromosome 14 open reading frame 130 || Hs.648806 || NM_018108 || || 55148 || hHR006022 || 1403926	-0.19	-0.29	-0.2	-0.36	0.06	0.04	-0.23	-0.15	0.27	0.33	-0.47	-0.05	0.23	0.52	-0.165	-0.05	0.42	0.55	0.56	0.54	0.79	1.2
2965	hSQ010476	|| GTF2H1 || General transcription factor IIH, polypeptide 1, 62kDa || Hs.577202 || NM_005316 || || 2965 || hHR024811 || 1403941	-0.61	-0.49	-0.5	-0.48	-0.61	-0.45	0.07	0.23	-0.16	-0.13	-0.29	-0.16	-0.01	-0.22	1.335	1.29	1.89	1.69	1.31	0.66	0.79	0.59
84220	hSQ018970	|| RGPD5 || RANBP2-like and GRIP domain containing 5 || Hs.469630 || NM_005054 || || 84220 || hHR030927 || 1403965	-0.62	-0.46	-0.91	-1.49	-0.49	-0.47	-1.13	-1.18	-1.37	-1.11	-1.71	-1.18	-1.24	-0.57	0.445	0.03	0.55	0.42	0.52	0.08	0.26	-0.9
5813	hSQ042224	|| PURA || Purine-rich element binding protein A || Hs.443121 || NM_005859 || || 5813 || hHR013148 || 1404017	-0.97	-1.22	-0.86	-1.33	-1.18	-1.18	-1.52	-1.23	-1.65	-2	-1.76	-1.73	-1.1	-1.85	-1.425	-1.42	-1.75	-2.18	-0.79	-1.09	-0.98	-1.26
392550	hSQ024287	|| || || || XM_498391 || || || hHR027944 || 1404067	0.66	0.99	0.95	0.11	1.17	1.32	2.43	1.95	1.07	1.38	1.42	1.2	1.12	2.13	-0.855	-0.44	-1.38	-1.17	-0.07	0.11	-1.54	0.42
567	hSQ023490	|| B2M || Beta-2-microglobulin || Hs.693631 || NM_004048 || || 567 || hCM000986 || 1404078	-1.27	-1.39	-1.6	-1.46	-0.85	-0.88	0.27	0.14	0.85	0.94	0.29	-0.16	-0.65	1.19	0.065	-0.04	0.44	0.32	0.25	0.9	0.18	-0.75
10934	hSQ026163	|| MORF4 || Mortality factor 4 || Hs.534391 || NM_006792 || || 10934 || hHR029693 || 1404096	0.34	0.46	-0.87	-0.84	0.06	0.34	0.01	0.06	-0.86	-1.41	-0.18	-0.5	0.58	0.28	-1.495	-1.47	-1.57	-0.71	-0.15	0.07	-1	-0.85
10952	hSQ011782	|| SEC61B || Sec61 beta subunit || Hs.191887 || NM_006808 || || 10952 || hHR029216 || 1404182	-0.56	-0.41	0.83	0.22	0.49	0.54	1.28	0.78	1.37	1.53	0.49	0.32	0.33	1.7	1.565	1.79	1.06	0.81	0.8	0.82	0.25	2.14
26784	hSQ030223	|| RPS2 || Ribosomal protein S2 || Hs.498569 || Y11158 || || 6187 || hHR014578 || 1404187	-0.78	-0.66	-0.29	-0.23	-0.13	-0.03	-1.39	-1.79	-1.89	-4.86	-0.18	-1.41	-1.1	-0.63	-0.475	-0.51	-0.05	-1.14	-1.27	-0.54	0.75	-0.73
85236	hSQ032762	|| HIST1H2BK || Histone cluster 1, H2bk || Hs.437275 || NM_080593 || || 85236 || hHR031125 || 1404202	0.67	0.51	0.27	0.16	0.58	0.57	2.21	2.01	1.9	1.77	1.61	0.77	0.98	1.08	1.495	1.4	1.35	0.96	0.61	0.74	0.82	0.59
3145	hSQ042009	|| HMBS || Hydroxymethylbilane synthase || Hs.82609 || NM_000190 || || 3145 || hCM001031 || 1404256	-0.33	-0.3	-0.07	-0.01	0.31	0.16	0.65	0.64	0.65	0.65	0.66	-0.39	-0.13	0.67	0.485	0.38	0.71	0.08	-0.18	0.04	1.08	1.18
401606	hSQ018883	|| || || || XM_377028 || || || hHR030512 || 1404260	1.06	1.09	0.95	0.69	1.36	1.17	0.24	0.55	0.53	0.37	0.67	0.69	0.88	0.42	0.825	0.82	0.39	1.04	0.67	0.54	1.34	1.92
10250	hSQ031964	|| SRRM1 || Serine/arginine repetitive matrix 1 || Hs.18192 || NM_005839 || || 10250 || hHR030600 || 1404294	2.19	2.3	1.08	0.93	1.61	2.14	1.4	1.55	0.22	0.32	0.26	0.25	0.65	0.68	0.385	0.46	0.46	0.32	0.26	-0.11	0.61	0.42
286170	hSQ008362	|| LOC286170 || Hypothetical protein LOC286170 || Hs.656846 || AK055620 || || 286170 || hHR004233 || 1404313	-2.29	-2.44	-1.87	-2.15	-2.03	-2.11	-1.56	-1.82	-2.02	-1.96	-3.65	-2.33	-1.78	-2.71	0.495	0.33	-0.22	-0.44	-0.15	-0.76	-0.56	-1.33
6624	hSQ015055	|| FSCN1 || Fascin homolog 1, actin-bundling protein (Strongylocentrotus purpuratus) || Hs.118400 || NM_003088 || || 6624 || hHR029879 || 1404317	1.34	1.32	1.52	0.73	0.8	0.97	1.67	1.81	1.44	1.21	1.34	-0.08	1.22	0.36	1.135	1.34	0.34	-0.27	-0.41	-1.02	0.82	-0.17
7172	hSQ040406	|| TPMT || Thiopurine S-methyltransferase || Hs.444319 || NM_000367 || || 7172 || hHR010296 || 1404405	-0.02	0.02	0.41	-0.41	-0.02	-0.16	-0.81	-0.81	-0.79	-0.87	-1.45	-0.35	-0.7	-0.78	-0.065	-0.21	0.01	0.03	0.14	0.02	-3.58e-09	-0.32
126208	hSQ011811	|| ZNF787 || Zinc finger protein 787 || Hs.397153 || AF000560 || || 126208 || hHR016932 || 1404440	1.16	1.04	1.86	0.69	1.13	0.99	1.31	1.26	1.04	0.99	1.53	-0.36	0.33	0.36	1.435	1.32	0.97	-0.09	0.79	0.02	1.59	0.79
55173	hSQ014940	|| MRPS10 || Mitochondrial ribosomal protein S10 || Hs.380887 || NM_018141 || || 55173 || hHR024317 || 1404445	-0.59	-0.37	-1.17	-0.85	-0.36	-0.49	0.03	-0.21	-0.02	-0.57	0.1	-0.01	-0.09	0.21	-0.075	0.1	0.78	0.5	0.72	1	0.23	0.31
400652	hSQ036477	|| || || || XM_375543 || || || hHR030063 || 1404529	-0.34	-0.08	-0.69	-1.45	0.01	0.09	1.13	0.97	0.53	0.77	0.64	0.28	0.54	1.8	-0.585	-0.71	-0.52	-0.76	0.1	0.22	-1.11	-0.3
8574	hSQ044041	|| AKR7A2 || Aldo-keto reductase family 7, member A2 (aflatoxin aldehyde reductase) || Hs.571886 || NM_003689 || || 8574 || hHR021621 || 1404556	0.06	0.09	0.38	0.28	0.12	0.47	1.27	1.09	1.08	0.98	0.91	-0.24	0.46	0.75	1.795	1.88	1.88	1.12	0.57	0.28	1.85	1.14
440834	hSQ021806	|| || || || XM_498882 || || || hHR024490 || 1404626	-0.49	-0.66	-0.92	-1.05	-0.72	-1.14	-1.3	-0.91	-1.14	-1.24	-0.58	-1.05	-0.12	-1.67	-0.455	-0.66	-0.79	-0.46	-0.3	-0.55	-0.01	-0.9
10112	hSQ022738	|| KIF20A || Kinesin family member 20A || Hs.73625 || NM_005733 || || 10112 || hHR006196 || 1404686	1.05	1.04	0.43	-0.06	0.96	0.86	1.47	1.55	0.07	0.51	0.01	0.05	0.82	-0.23	-0.285	-0.4	-1.13	-0.99	-0.32	-0.19	-0.64	0.89
2697	hSQ014720	|| GJA1 || Gap junction protein, alpha 1, 43kDa || Hs.74471 || NM_000165 || || 2697 || hHR026571 || 1404698	-0.43	-0.44	-1.13	-0.01	0.32	-0.18	-2.33	-2.8	-1.53	-3.76	-1.03	-0.07	-0.95	0.29	-1.975	-2.15	-1.92	-1.47	-0.95	0.22	-1.27	-2.38
283458	hSQ022999	|| || || || AC004263 || || || hHR029080 || 1404699	-0.51	-0.66	-0.16	-0.5	-0.21	-0.2	1.02	0.96	0.82	1.03	0.75	-0.1	-0.11	0.7	0.215	0.16	-0.22	-0.56	-0.56	-0.04	-0.26	0.64
254531	hSQ037952	|| AGPAT7 || 1-acylglycerol-3-phosphate O-acyltransferase 7 (lysophosphatidic acid acyltransferase, eta) || Hs.352614 || NM_153613 || || 254531 || hHR001464 || 1404718	0.74	0.7	1.23	0.65	0.68	1.04	1.28	1.32	1.61	1.65	0.81	-0.14	0.59	0.17	1.495	1.57	0.86	0.43	0.01	-0.49	0.69	1.09
441112	hSQ026826	|| || || || XM_496779 || || || hHR028455 || 1404724	-0.02	-0.08	0.35	-0.24	-0.31	-0.17	1.04	0.95	1.1	1.12	0.36	-0.21	-0.06	0.61	1.315	1.08	1.17	0.53	0.35	0.83	1.42	1.38
54602	hSQ011443	|| NDFIP2 || Nedd4 family interacting protein 2 || Hs.525093 || AB032991 || || 54602 || hHR004964 || 1404737	-1.35	-1.23	-1	-1.25	-1.01	-0.9	-0.21	-0.12	0.38	0.21	-0.49	-0.32	-0.13	0.03	-0.005	-0.39	-0.39	-0.41	-0.19	-0.45	-0.11	-0.4
6389	hSQ038458	|| SDHA || Succinate dehydrogenase complex, subunit A, flavoprotein (Fp) || Hs.440475 || NM_004168 || || 6389 || hCM000956 || 1404781	0.09	0.13	-0.13	-0.31	-0.56	-0.73	-0.02	0.36	-0.2	0.04	-0.11	-0.79	0.3	-0.43	-1.225	-1.05	-1.51	-1.09	0.45	0.41	0.06	0.82
54853	hSQ039874	|| WDR55 || WD repeat domain 55 || Hs.286261 || NM_017706 || || 54853 || hHR015315 || 1404802	-1.53	-1.69	-1.24	-1.35	-0.94	-1.29	-0.76	-0.73	-0.88	-0.62	-0.89	-0.56	-0.68	-1.62	-0.725	-0.55	-0.14	-0.55	0.04	-0.33	-0.06	1.69
55855	hSQ027653	|| FAM45B || Family with sequence similarity 45, member B || Hs.558514 || NM_018472 || || 55855 || hHR031603 || 1404811	0.24	0.42	0.35	0.24	0.53	0.7	0.51	0.36	0.7	0.67	0.38	0.53	0.56	0.57	0.525	0.56	0.97	1.39	1.13	0.96	0.28	0.1
286052	hSQ030419	|| LOC286052 || Hypothetical protein LOC286052 || Hs.100691 || AK095104 || || 286052 || hHR007504 || 1404819	-2.06	-1.79	-1.27	-1.64	-1.39	-1.54	-1.33	-1.51	-1.18	-0.98	-1.65	-1.3	-0.85	-1.18	-0.545	-0.93	-0.8	-0.8	-0.69	-1.2	-0.74	-1.63
10730	hSQ041865	|| YME1L1 || YME1-like 1 (S. cerevisiae) || Hs.499145 || NM_139312 || || 10730 || hHR002804 || 1404891	-0.93	-0.8	-0.89	-0.97	-0.6	-0.55	-0.69	-0.78	-0.76	-0.6	-1.2	-0.82	-0.29	-0.4	-0.265	-0.21	-0.6	-0.06	0.54	0.17	-0.26	-0.99
390290	hSQ009731	|| || || || NC_000012 || || || hHR029169 || 1404896	-1.07	-1.03	-0.98	-1.52	-0.49	-0.93	-1.38	-1.44	-1.47	-1.39	-1.48	-1.34	-0.39	-1.25	-3.025	-2.63	-3.32	-3.31	-1.08	-0.28	-2.27	-0.12
374650	hSQ029960	|| || || || NM_198079 || || || hHR029254 || 1404935	-1.79	-2.06	-1.03	-1.13	-1.11	-1.83	-2.08	-2.77	-3.4	-4.07	-2.67	-1.87	-3.13	-5.23	-2.475	-2.89	-3.75	-3.39	-3.26	-2.57	-1.88	-3.27
8362	hSQ016491	|| HIST1H4I || Histone cluster 1, H4i || Hs.528055 || NM_003541 || || 8294 || hHR031187 || 1404958	-0.71	-0.48	0.31	0.23	0.47	1	0.86	0.68	0.93	0.48	0.91	0.46	-0.94	0.53	1.675	1.38	1.58	0.61	0.26	0.63	1.37	1.54
79008	hSQ012533	|| SULT1A4 || Sulfotransferase family, cytosolic, 1A, phenol-preferring, member 4 || Hs.460558 || NM_024044 || || 445329 || hHR028727 || 1404990	-1.1	-1.01	-0.41	-0.74	-0.34	-0.55	0.45	0.51	0.35	0.25	0.62	-0.3	0.27	0.22	1.385	1.39	0.53	0.02	0.13	-0.27	0.74	0.52
3145	hSQ042349	|| HMBS || Hydroxymethylbilane synthase || Hs.82609 || NM_000190 || || 3145 || hCM001054 || 1405005	-0.21	-0.33	0.21	-0.03	0.15	0.12	0.3	0.63	0.66	0.45	0.56	-0.42	-0.22	0.6	0.455	0.45	0.35	-0.17	-0.18	0.13	1.11	0.61
80227	hSQ039572	|| WDR71 || WD repeat domain 71 || Hs.525017 || NM_025155 || || 80227 || hHR026193 || 1405025	-0.24	-0.1	-0.01	-0.06	-0.16	-0.41	-0.32	-0.21	0.24	0.27	-0.11	0.05	0.35	0.01	-0.325	-0.28	0.12	0.33	0.82	0.9	0.12	1.19
441260	hSQ040986	|| || || || XM_496901 || || || hHR028807 || 1405027	-1.34	-1.45	-1.16	-1.07	-1.63	-1.56	-1.65	-1.23	-2.27	-2.54	-0.71	-2.06	-1.43	-2.67	-2.025	-1.91	-1.92	-2.54	-2.42	-2.09	-1.88	-3.67
23435	hSQ032624	|| TARDBP || TAR DNA binding protein || Hs.300624 || NM_007375 || || 23435 || hHR007838 || 1405048	-0.83	-0.78	-0.99	-0.84	-0.44	-0.47	-1.52	-1.39	-0.63	-0.5	-1.29	-0.52	-0.53	-0.22	-1.935	-2.37	-1.81	-0.86	-1.08	-0.84	-1.03	0.02
4116	hSQ031198	|| MAGOH || Mago-nashi homolog, proliferation-associated (Drosophila) || Hs.421576 || NM_002370 || || 4116 || hHR019067 || 1405055	0.64	0.95	1.39	0.76	1.61	1.74	2.05	1.71	1.61	1.79	1.3	1.04	2.33	1.64	-0.825	-0.67	-2.26	-1.73	-0.6	-0.44	-2.21	0.95
11094	hSQ018158	|| C9orf7 || Chromosome 9 open reading frame 7 || Hs.62003 || NM_017586 || || 11094 || hHR021122 || 1405060	0.72	0.7	0.95	0.57	0.22	0.05	0.94	0.93	1.55	1.25	1.09	-0.09	0.27	0.01	1.685	1.56	1.64	1.16	0.72	0.01	1.69	-0.05
3281	hSQ023408	|| HSBP1 || Heat shock factor binding protein 1 || Hs.250899 || NM_001537 || || 3281 || hHR025227 || 1405085	-1.39	-1.27	-0.52	-0.84	-0.6	0.02	2.38e-09	-0.01	-0.19	0.51	-0.43	-0.49	-0.31	0.62	-1.165	-1.07	-1.5	-1.69	-0.65	-0.16	-1.61	0.43
6185	hSQ009678	|| RPN2 || Ribophorin II || Hs.370895 || NM_002951 || || 6185 || hCT000747 || 1405095	2.08	1.68	0.32	1.16	1.59	1.53	-1.81	-3.09	-2.83	-3.15	1.08	1.16	0.61	0.63	-0.085	0.24	1.03	1.74	0.69	2.1	1.38	0.9
55151	hSQ019244	|| TMEM38B || Transmembrane protein 38B || Hs.411925 || NM_018112 || || 55151 || hHR003147 || 1405120	-1.32	-1.24	-0.92	-0.88	-0.53	-0.51	-0.6	-0.62	0.24	0.7	-0.82	-0.06	-0.75	0.48	0.055	0.19	0.6	0.46	0.54	0.66	0.53	1.25
442362	hSQ006660	|| || || || || || || hHR026297 || 1405211	-0.45	-0.39	0.29	0.17	0.15	-0.34	0.56	0.21	0.62	1.22	0.28	0.2	-0.24	1.02	0.245	0.44	0.14	0.1	0.05	1.01	0.16	1.75
79135	hSQ023523	|| APOO || Apolipoprotein O || Hs.495851 || NM_024122 || || 79135 || hHR015974 || 1405269	-0.72	-0.71	-0.6	-0.79	-0.1	-0.58	0.8	0.62	1.11	1.19	0.53	0.13	0.17	0.48	0.365	0.01	0.4	0.1	0.18	-0.1	0.38	0.46
55374	hSQ020045	|| TMCO6 || Transmembrane and coiled-coil domains 6 || Hs.651145 || NM_018502 || || 55374 || hHR009520 || 1405273	-0.93	-1.08	-0.97	-1.16	-0.92	-1	0.25	0.26	0.05	0.1	0.25	-0.88	-0.22	-0.7	1.305	1.15	1.81	0.8	0.36	0.09	1.56	0.96
8363	hSQ025749	|| HIST1H4H || Histone cluster 1, H4h || Hs.278483 || NM_021968 || || 8365 || hHR030836 || 1405284	-0.39	-0.5	0.13	-0.16	-0.11	0.4	1.41	1.19	1.12	0.81	1.53	0.37	-0.51	0.95	2.155	1.92	1.9	1.35	0.6	0.55	1.35	1.05
55449	hSQ027922	|| C14orf167 || Chromosome 14 open reading frame 167 || Hs.601265 || BC062348 || || 55449 || hHR012784 || 1405288	2.25	1.86	0.89	0.78	1.24	1.59	2.38e-09	-0.41	-0.03	-0.25	0.54	0.41	0.7	-0.29	-0.295	-0.08	0.37	0.3	-0.11	-0.56	0.38	-0.43
8450	hSQ029369	|| CUL4B || Cullin 4B || Hs.102914 || NM_003588 || || 8450 || hHR004728 || 1405310	-0.25	-0.03	-0.72	-0.98	-0.6	-0.85	-0.67	-0.52	0.14	0.13	-0.54	0.03	0.04	-0.12	-1.075	-1.34	-0.84	-0.72	-0.17	-0.46	-1.25	-1.19
440673	hSQ024788	|| NBPF1 || Neuroblastoma breakpoint family, member 1 || Hs.515947 || BX538005 || || 55672 || hHR030224 || 1405348	-1.22	-0.91	-0.48	-1.01	-0.61	-0.39	-1.73	-1.55	-1.78	-1.75	-2.72	-2.05	-1.33	-1.48	-0.415	-0.37	-0.44	-0.81	0.25	-0.2	-0.57	-0.53
3159	hSQ043147	|| HMGA1 || High mobility group AT-hook 1 || Hs.518805 || NM_145904 || || 3159 || hHR030322 || 1405385	2.39	2.3	3.2	1.86	1.82	2	3	2.61	2.6	2.73	1.96	1.08	1.38	0.5	1.725	2.05	1.08	-0.28	-0.17	-0.15	0.97	2.98
7114	hSQ044888	|| TMSB4X || Thymosin, beta 4, X-linked || Hs.522584 || NM_021109 || || 7114 || hHR030933 || 1405488	-0.84	-1.02	-0.75	-1.46	-1.01	-1.34	0.61	0.42	0.39	0.41	-0.17	-0.9	-0.24	-0.37	-0.595	-0.69	-1.64	-1.9	-0.77	-0.7	-1.49	-1.12
8379	hSQ045361	|| MAD1L1 || MAD1 mitotic arrest deficient-like 1 (yeast) || Hs.654838 || NM_001013836 || || 8379 || hHR019802 || 1405531	1.28	0.92	0.48	0.06	0.13	0.09	0.43	0.47	-0.22	-1.46	0.53	-0.83	-0.3	-0.99	-0.035	-0.11	-0.62	-0.97	-0.91	-0.88	0.42	-0.17
3145	hSQ011855	|| HMBS || Hydroxymethylbilane synthase || Hs.82609 || NM_000190 || || 3145 || hCM000926 || 1405539	0.03	-0.15	0.05	-0.1	0.12	-0.41	0.41	0.45	0.59	0.64	0.75	-0.53	-0.25	0.32	0.335	0.09	0.35	0.24	-0.25	0.08	1.18	0.89
3275	hSQ024284	|| PRMT2 || Protein arginine methyltransferase 2 || Hs.154163 || NM_206962 || || 3275 || hHR012311 || 1405616	0.06	0.1	0.34	-0.06	-0.23	-0.32	0.47	0.5	0.55	0.53	0.22	-0.39	0.71	0.09	0.485	0.28	0.69	0.78	0.54	0.21	0.68	0.71
5379	hSQ040699	|| PMS2L1 || Postmeiotic segregation increased 2-like 1 || Hs.634244 || BC038996 || || 5379 || hHR031774 || 1405656	0.51	0.55	0.03	-0.04	-0.3	-0.2	0.94	0.34	0.84	-0.08	0.16	-0.59	-0.47	-1.25	-0.285	-0.48	-1.32	-1.91	-0.79	-0.92	-0.18	-0.05
387923	hSQ029941	|| C13orf21 || Chromosome 13 open reading frame 21 || Hs.377972 || NM_001010897 || || 387923 || hHR006395 || 1405663	-1.23	-0.95	-0.03	-0.16	0.13	0.16	0.47	0.26	0.57	0.54	-9.54e-09	-0.36	-0.01	1.26	1.175	1.01	1.55	0.79	1.07	1.03	1.58	1.4
386757	hSQ003742	|| || || || NM_198857 || || || hHR029204 || 1405687	1.15	1.26	0.94	0.74	0.93	1.22	1.43	1.3	1.2	1.02	1.58	0.3	0.87	0.15	1.695	1.94	1.65	1.02	0.78	0.33	1.73	1.19
388365	hSQ000713	|| || || || XM_373723 || || || hHR026807 || 1405722	4.03	3.98	1.64	1.31	4.01	4.12	1.38	1.48	1.08	1.36	2.49	2.51	1.61	3.08	1.285	1.06	0.6	1.56	0.38	0.58	2.46	-0.38
127281	hSQ041212	|| C1orf93 || Chromosome 1 open reading frame 93 || Hs.462033 || NM_152371 || || 127281 || hHR016625 || 1405732	1.3	1.12	0.48	0.35	0.74	0.86	1.36	0.75	1.12	-0.29	1.9	-0.01	0.96	0.26	1.355	1.52	0.94	-0.19	-0.05	-0.65	0.38	0.51
6908	hSQ012542	|| TBP || TATA box binding protein || Hs.590872 || NM_003194 || || 6908 || hCM001024 || 1405755	0.4	0.22	-0.1	0.2	0.16	-0.11	0.72	0.68	0.87	0.8	0.04	0.24	0.29	-0.01	0.515	0.49	1.23	1.33	0.46	1.33	1.26	1.11
392	hSQ043155	|| ARHGAP1 || Rho GTPase activating protein 1 || Hs.138860 || NM_004308 || || 392 || hHR016742 || 1405762	1.49	1.39	0.69	0.59	1.24	0.81	0.2	0.12	0.22	0.14	0.33	0.15	0.8	-0.38	0.175	-0.03	0.07	0.13	0.12	-0.16	0.46	0.55
55627	hSQ010291	|| SMPD4 || Sphingomyelin phosphodiesterase 4, neutral membrane (neutral sphingomyelinase-3) || Hs.516450 || NM_017751 || || 55627 || hHR030592 || 1405788	0.45	0.65	0.05	-0.32	0.17	0.11	0.1	0.31	0.08	0.16	0.09	-0.41	0.42	-0.25	0.415	0.56	0.45	0.35	0.33	-0.21	0.51	0.82
81137	hSQ015907	|| OR7E104P || Olfactory receptor, family 7, subfamily E, member 104 pseudogene || Hs.651974 || AL137719 || || 81137 || hHR029973 || 1405848	0.8	0.57	0.97	0.64	0.64	0.86	2	1.66	2.35	2.19	1.64	0.94	0.83	1.46	2.625	2.41	1.89	1.34	0.59	0.51	1.38	1.05
388734	hSQ039794	|| || || || XM_371340 || || || hHR029294 || 1405874	7.15e-09	-0.15	0.2	-0.26	0.45	0.1	0.87	0.67	0.96	1.01	1	-0.15	0.17	0.53	0.975	0.22	0.02	-0.19	-0.18	-0.13	0.58	0.01
442058	hSQ034300	|| || || || XM_497890 || || || hHR027608 || 1405881	-0.16	-0.07	0.19	0.05	0.31	0.31	1.58	1.37	1.82	1.73	0.97	0.78	0.56	2.07	-0.105	0.04	-0.51	-0.22	-0.39	0.22	-0.21	-0.01
5714	hSQ018390	|| PSMD8 || Proteasome (prosome, macropain) 26S subunit, non-ATPase, 8 || Hs.78466 || NM_002812 || || 5714 || hHR018170 || 1405918	-0.19	-0.09	-0.26	-0.62	-0.07	-0.07	1.41	1.45	0.78	1.03	0.78	-0.03	0.52	0.3	-0.645	-0.66	-1.02	-1.33	-0.35	-0.21	-0.26	0.02
374969	hSQ011982	|| CCDC23 || Coiled-coil domain containing 23 || Hs.113919 || NM_199342 || || 374969 || hHR010518 || 1405933	-0.14	-0.1	-0.21	-0.24	0.32	0.29	1.34	1.42	1.16	1.2	0.85	0.45	0.41	1.13	-0.135	-0.16	-0.49	-0.76	-0.44	-0.42	-1.04	-0.65
441410	hSQ010442	|| || || || XM_497031 || || || hHR030682 || 1405970	0.64	0.5	0.38	0.4	0.92	0.88	-0.41	-0.75	-1.42	-1.69	1.48	-0.05	0.64	0.4	-1.655	-1.34	-1.77	-2.41	-1.1	-0.5	-0.68	-0.12
402457	hSQ026891	|| || || || XM_379780 || || || hHR030785 || 1406004	0.31	0.28	0.44	0.14	0.06	-0.07	0.07	0.32	-0.1	-0.06	0.27	-0.68	-0.19	-0.34	1.185	1.31	1.22	0.7	2.24e-10	-0.43	1.54	1.24
64856	hSQ020155	|| VWA1 || Von Willebrand factor A domain containing 1 || Hs.449009 || NM_022834 || || 64856 || hHR030178 || 1406062	-0.21	-0.26	-0.03	-0.28	-0.37	-0.02	0.58	0.49	0.43	0.38	0.48	-1.02	-0.03	-0.29	1.085	1.73	1.22	0.05	0.16	-1.87	1.36	-0.28
401624	hSQ042145	|| CXYorf1 || Chromosomes X and Y open reading frame 1 || Hs.446466 || XM_377073 || || 653440 || hHR031407 || 1406100	-0.35	-0.4	-0.88	-0.99	-1.39	-1.22	0.13	-0.04	-0.62	-1.07	-0.01	-1.74	-0.52	-1.85	-0.075	0.05	-0.33	-1.54	-0.17	-0.83	0.64	-0.08
65996	hSQ029290	|| MGC2752 || Hypothetical protein MGC2752 || Hs.541177 || NM_023939 || || 65996 || hHR017426 || 1406193	-0.26	-0.63	0.15	-0.05	0.11	-0.55	-0.77	-1.04	-0.24	-0.55	-0.06	-0.79	-0.85	-0.81	-0.725	-0.54	-0.5	-0.23	-1.35	-1.1	0.82	-0.76
389562	hSQ003360	|| || || || XM_374236 || || || hHR013058 || 1406223	-1.31	-1.24	-0.66	-0.92	-1.43	-1.91	-0.22	-0.35	0.52	0.53	-0.37	-1.46	-0.18	-1.14	0.555	0.26	-0.73	-0.58	-0.82	-1.36	-0.48	-0.33
55312	hSQ039531	|| RFK || Riboflavin kinase || Hs.37558 || NM_018339 || || 55312 || hHR004977 || 1406246	-2.14	-1.95	-1.28	-1.36	-0.97	-1.12	-1.5	-1.31	-0.4	-0.33	-1.72	-0.66	-0.5	-0.25	-0.655	-0.7	-0.4	-0.53	2.24e-10	-0.24	-0.36	0.35
54888	hSQ007045	|| NSUN2 || NOL1/NOP2/Sun domain family, member 2 || Hs.481526 || NM_017755 || || 54888 || hHR025774 || 1406256	-0.68	-0.66	-0.99	-1.14	-0.63	-0.39	-0.28	-0.17	-0.45	-0.37	-1.05	-0.89	0.16	-0.59	-1.405	-1.24	-1.54	-0.92	0.11	-0.44	-0.6	0.43
23067	hSQ033379	|| SETD1B || SET domain containing 1B || Hs.507122 || AB028999 || || 23067 || hHR005194 || 1406281	2.17	2.2	0.74	0.54	1.64	1.9	1.76	2	0.27	0.05	0.45	0.83	1.35	0.83	2.015	1.37	1.04	0.85	0.81	0.37	1.12	0.55
55437	hSQ044769	|| ALS2CR2 || Amyotrophic lateral sclerosis 2 (juvenile) chromosome region, candidate 2 || Hs.652338 || NM_018571 || || 55437 || hHR030366 || 1406286	-0.41	-0.39	0.06	-0.3	-0.26	0.09	0.21	0.4	1.07	1.02	-0.16	-0.1	-0.1	0.14	1.145	1	1.33	0.59	0.8	0.6	0.42	1.75
9416	hSQ016530	|| DDX23 || DEAD (Asp-Glu-Ala-Asp) box polypeptide 23 || Hs.130098 || NM_004818 || || 9416 || hHR028619 || 1406295	0.54	0.56	0.18	-0.46	0.1	0.41	0.93	1.13	-0.32	-0.32	-0.22	-0.52	0.53	-0.32	-0.525	-0.78	-1.32	-0.67	-0.45	-0.62	-0.05	-0.7
51082	hSQ029008	|| POLR1D || Polymerase (RNA) I polypeptide D, 16kDa || Hs.507584 || NM_015972 || || 51082 || hHR008723 || 1406299	0.14	0.28	0.66	0.39	1.15	1.34	1.52	1.4	1.15	1.65	1.16	0.84	1.07	1.74	0.385	0.29	0.37	-0.36	-0.13	0.46	0.38	1.05
84084	hSQ029595	|| RAB6C || RAB6C, member RAS oncogene family || Hs.591552 || NM_032144 || || 84084 || hHR029721 || 1406335	-0.26	-0.19	-0.07	-0.34	-0.22	-0.31	0.17	0.42	0.55	0.48	-0.11	0.01	0.45	0.22	0.205	0.47	0.02	0.1	0.45	0.11	0.05	1.01
54460	hSQ027367	|| MRPS21 || Mitochondrial ribosomal protein S21 || Hs.405880 || NM_018997 || || 54460 || hHR010963 || 1406340	-0.58	-0.62	-0.98	-0.87	-0.78	-0.86	0.52	0.43	0.71	0.64	0.48	-0.76	0.46	0.49	0.465	0.32	-0.08	-0.59	-0.37	0.16	-0.19	-0.63
57479	hSQ021728	|| PRR12 || Proline rich 12 || Hs.590971 || AB033031 || || 57479 || hHR009910 || 1406400	3.26	3.09	2.09	1.44	1.47	1.97	1.81	2.27	0.26	0.31	1.26	0.7	0.84	-0.5	3.305	3.03	2.5	1.33	1.23	-0.31	1.53	-0.27
64397	hSQ035351	|| ZFP106 || Zinc finger protein 106 homolog (mouse) || Hs.511143 || NM_022473 || || 64397 || hHR006475 || 1406422	-0.38	-0.23	-1.08	-1.27	-0.92	-0.68	-1.73	-1.66	-1.44	-0.96	-1.8	-1.46	-0.85	-0.67	-1.605	-1.21	-1.47	-0.93	-0.15	-0.8	-1.81	-1.67
2186	hSQ034181	|| BPTF || Bromodomain PHD finger transcription factor || Hs.444200 || NM_182641 || || 2186 || hHR010096 || 1406440	1.36	1.49	0.15	0.14	-0.01	0.36	-0.75	-0.78	-1.64	-1.45	-1.16	-0.59	-0.39	-1.19	-0.925	-1.08	-1.45	-1.09	-0.43	-1.3	-1.35	-1.34
3336	hSQ018679	|| HSPE1 || Heat shock 10kDa protein 1 (chaperonin 10) || Hs.1197 || NM_002157 || || 3336 || hHR029810 || 1406530	-2.43	-2.16	-0.44	-1.34	-0.45	-0.65	-0.44	-0.9	-0.6	-0.04	-1.78	-1.05	-0.9	0.05	-1.335	-1.19	-1.42	-1.5	-0.21	-0.33	-2.3	0.36
341412	hSQ002362	|| || || || XM_292046 || || || hHR028156 || 1406545	1.22	1.37	1.2	0.58	1.38	1.48	2.39	2.36	2.33	2.49	1.76	1.1	1.29	2.21	0.145	0.21	-0.76	-0.88	-0.25	0.31	-1.14	0.46
441756	hSQ043468	|| || || || XM_497495 || || || hHR029912 || 1406564	-0.2	-0.32	0.48	0.12	0.49	0.36	0.94	0.83	1.07	-1.03	1.74	0.05	-0.05	0.61	1.925	2.16	1.9	0.87	0.27	0.13	1.71	2.09
125061	hSQ019938	|| AFMID || Arylformamidase || Hs.558614 || BX648442 || || 125061 || hHR014815 || 1406632	-0.28	-0.3	-0.2	-0.63	-0.84	-0.4	-1.21	-2.35	-3.3	-4.38	0.51	-0.2	0.08	-0.32	0.355	0.9	1.08	0.76	0.38	0.86	1.14	0.85
9189	hSQ026774	|| DHRSX || Dehydrogenase/reductase (SDR family) X-linked || Hs.131452 || NM_004729 || || 207063 || hHR031259 || 1406641	0.08	0.15	0.22	0.21	0.65	0.82	0.04	-0.29	-0.54	-0.51	-0.68	-0.72	0.2	-0.64	0.765	0.42	0.51	0.37	0.66	0.09	0.96	0.78
51727	hSQ035074	|| CMPK || Cytidylate kinase || Hs.11463 || NM_016308 || || 51727 || hHR006842 || 1406649	-1.06	-0.93	-0.76	-1.06	-0.7	-0.7	0.09	-0.05	0.39	0.57	-0.45	-0.27	-0.19	0.1	0.525	0.35	1.07	0.78	0.89	0.39	0.23	1.51
339263	hSQ030436	|| C17orf51 || Chromosome 17 open reading frame 51 || Hs.514016 || BC052777 || || 339263 || hHR013654 || 1406693	-0.54	-0.6	-0.86	-1.09	-0.63	-0.64	-0.55	-0.46	-0.43	-0.3	-0.61	-0.85	0.4	-1.22	0.085	0.04	-0.03	0.2	0.72	0.1	0.13	-0.22
6297	hSQ014440	|| SALL2 || Sal-like 2 (Drosophila) || Hs.416358 || NM_005407 || || 6297 || hHR022826 || 1406742	3.05	2.63	2.09	1.73	2.66	2.34	1.36	1.85	1.25	1.59	1.78	1.78	1.76	1.29	0.275	0.34	0.18	0.8	0.31	0.64	0.54	1.71
202775	hSQ027786	|| || || Hs.131743 || || || || hHR004607 || 1406760	-0.43	-0.47	0.38	0.07	0.34	0.3	0.9	0.58	0.81	0.6	0.18	-0.12	0.23	0.31	1.285	1.09	0.95	0.28	0.44	0.24	0.96	0.81
79081	hSQ037893	|| C11orf48 || Chromosome 11 open reading frame 48 || Hs.9061 || NM_024099 || || 79081 || hHR019595 || 1406820	0.62	0.51	-0.23	-0.73	0.21	0.54	1.23	1.13	-0.04	0.02	0.29	-0.44	0.58	0.33	-1.245	-1.24	-2.26	-1.93	-1.23	-0.82	-0.84	-1.5
51363	hSQ019769	|| GALNAC4S-6ST || B cell RAG associated protein || Hs.287537 || NM_015892 || || 51363 || hHR008337 || 1406823	-0.58	-0.36	-0.16	-0.38	0.12	-0.03	-0.5	-0.57	-0.5	-0.42	-0.65	-0.62	0.18	-0.82	-0.175	-0.28	-0.42	0.05	-0.13	-0.24	0.06	-0.25
3251	hSQ019744	|| HPRT1 || Hypoxanthine phosphoribosyltransferase 1 (Lesch-Nyhan syndrome) || Hs.412707 || NM_000194 || || 3251 || hCM000864 || 1406832	-1.83	-1.78	-1.39	-1.22	-0.92	-1.15	-0.29	-0.09	0.67	0.87	-0.83	-0.43	-0.56	-0.03	0.035	-0.15	0.7	0.05	0.66	0.68	0.09	0.79
1362	hSQ017678	|| CPD || Carboxypeptidase D || Hs.446079 || NM_001304 || || 1362 || hHR009703 || 1406941	-0.91	-0.72	-1.32	-0.93	-0.79	-1.23	-0.75	-0.52	-0.59	-0.41	-0.85	-0.63	-0.51	-0.02	0.725	0.29	0.88	1.22	0.9	0.67	0.49	-1.43
23215	hSQ013627	|| BAT2D1 || BAT2 domain containing 1 || Hs.494614 || NM_015172 || || 23215 || hHR027288 || 1406961	2.16	2.37	0.09	0.04	1.03	1.67	-4.11	-4.09	-4.81	-5.39	-0.97	-0.38	-0.54	-0.03	-1.835	-1.33	-1.71	-0.74	-0.66	-0.31	-0.39	-2.71
5987	hSQ032341	|| TRIM27 || Tripartite motif-containing 27 || Hs.440382 || NM_006510 || || 5987 || hHR019764 || 1407015	0.4	0.56	1.04	0.69	0.77	0.64	-0.01	-2.38e-09	0.08	0.27	0.29	-0.1	0.5	-0.12	0.105	0.11	-0.27	-0.14	-0.4	-0.16	0.19	0.97
440979	hSQ015463	|| || || || XM_496661 || || || hHR021875 || 1407020	-0.25	0.04	0.86	0.22	0.32	1.35	0.29	-0.26	-0.81	0.02	-1.09	-0.48	0.43	0.38	-1.645	-2.1	-3.57	-2.64	-1.18	-1.1	-1.62	-0.14
80725	hSQ043681	|| SNIP || SNAP25-interacting protein || Hs.448872 || NM_025248 || || 80725 || hHR001592 || 1407047	3.68	3.49	2.47	1.62	2.98	2.88	1.15	1.14	1.12	0.58	1.57	1.21	1.14	1.16	1.785	1.83	1.55	1.22	0.94	1.11	2	0.44
115207	hSQ045350	|| || || || NM_138444 || || || hHR007385 || 1407073	-0.96	-0.77	-1.1	-1.14	-0.19	-0.34	-1.04	-0.93	-0.86	-0.56	-1.33	-0.47	-0.41	0.3	-1.825	-1.92	-2.64	-1.63	-1.41	-1.27	-1.37	-1.2
79001	hSQ029150	|| VKORC1 || Vitamin K epoxide reductase complex, subunit 1 || Hs.324844 || NM_024006 || || 79001 || hHR026021 || 1407082	0.07	-0.25	0.14	-0.14	-0.2	-0.09	0.07	-0.29	-0.03	-2.46	1.44	0.17	-0.13	0.72	2.325	1.99	2.09	1.35	0.11	1	1.57	0.05
9342	hSQ028507	|| SNAP29 || Synaptosomal-associated protein, 29kDa || Hs.108002 || NM_004782 || || 9342 || hHR008886 || 1407089	0.23	0.16	0.24	-0.04	0.24	0.01	-0.46	-0.26	-0.32	-0.52	-0.74	-0.08	0.19	-0.07	-0.805	-0.81	-0.69	-0.15	0.19	0.37	0.5	0.82
1466	hSQ019328	|| CSRP2 || Cysteine and glycine-rich protein 2 || Hs.530904 || NM_001321 || || 1466 || hHR030503 || 1407103	-0.54	-0.46	-0.24	-0.51	0.36	0.19	0.93	0.79	1.24	1.45	0.67	0.12	0.55	0.84	0.585	0.72	-0.2	-0.08	0.16	0.24	0.74	0.3
401470	hSQ036334	|| RPS26P10 || Ribosomal protein S26 pseudogene 10 || Hs.558929 || XM_376787 || || 401470 || hHR029779 || 1407132	-0.84	-0.82	-0.01	-0.92	-0.37	-0.53	1.57	1.54	1.1	1.26	0.88	-0.16	0.1	0.86	0.705	0.54	-0.04	-0.42	0.03	-0.1	-0.57	0.76
11128	hSQ016374	|| POLR3A || Polymerase (RNA) III (DNA directed) polypeptide A, 155kDa || Hs.436896 || NM_007055 || || 11128 || hHR016613 || 1407229	-0.18	-0.19	-0.55	-0.72	-0.63	-0.54	-1.19	-0.78	-1.69	-2.18	-0.99	-1.33	-0.15	-1.81	-0.605	-0.95	-0.65	-0.2	-0.2	-0.62	-0.36	-0.57
55388	hSQ042479	|| MCM10 || Minichromosome maintenance complex component 10 || Hs.198363 || NM_182751 || || 55388 || hHR003986 || 1407275	0.92	1.29	0.3	7.15e-09	1.23	1.12	0.65	0.91	-0.43	-0.25	-0.2	0.44	0.46	0.16	0.195	0	0.21	0.29	0.37	-0.03	0.41	-0.39
341784	hSQ016920	|| || || || XM_497370 || || || hHR028108 || 1407295	-0.66	-0.69	-0.63	-0.57	-0.72	-0.87	0.5	0.3	0.19	0.33	0.34	-0.51	0.54	-0.46	-1.365	-1.43	-1.53	-1.74	-0.94	-2.68e-09	-1.55	0.69
124944	hSQ009945	|| || || || AK055800 || || || hHR015754 || 1407317	0.45	0.33	0.64	0.21	0.05	0.02	1.55	1.68	1.84	2.03	1.49	0.23	0.65	1.2	1.875	1.78	1.03	0.69	0.27	0.54	0.99	1.35
10625	hSQ037766	|| || || || NM_016389 || || || hHR008118 || 1407363	-1.04	-0.79	-1.15	-1.26	-0.96	-1.03	-0.73	-0.79	-0.22	-0.35	-1.36	-0.62	-0.6	-0.4	0.315	-0.04	-0.33	0.46	0.77	0.37	0.29	0.88
387103	hSQ034030	|| C6orf173 || Chromosome 6 open reading frame 173 || Hs.486401 || NM_001012507 || || 387103 || hHR011618 || 1407392	-1.35	-1.15	-0.48	-1.23	-0.7	-1.06	0.95	0.64	0.9	1.03	-0.05	0.21	0.16	0.78	-0.405	-0.46	-1.02	-0.65	-0.39	-0.67	-1.26	0.13
112703	hSQ005090	|| LOC284361 || Hematopoietic signal peptide-containing || Hs.448941 || AK125745 || || 284361 || hHR016920 || 1407449	0.69	0.64	0.59	0.41	0.54	0.7	1.23	0.99	1.69	1.29	1.14	0.33	0.52	0.91	1.885	1.79	1.64	1.07	0.17	0.17	1.46	-0.06
390615	hSQ038519	|| || || || XM_496079 || || || hHR029450 || 1407596	-0.25	-0.35	-0.65	-0.69	0.11	0.15	-2.88	-2.93	-3.28	-3.34	-0.7	-0.58	-0.38	0.36	-2.945	-2.83	-2.85	-3.18	-1.37	-0.58	-2.75	0.17
26049	hSQ037813	|| KIAA0888 || KIAA0888 protein || Hs.91662 || BX647536 || || 26049 || hHR007103 || 1407610	-1.73	-1.39	-0.74	-0.65	-0.96	0.07	-0.86	-0.72	-1.05	-0.85	-1.36	-0.51	-0.83	-0.87	-0.025	-0.33	-0.36	-0.41	-0.02	-0.22	-0.49	0.45
689	hSQ021441	|| BTF3 || Basic transcription factor 3 || Hs.591768 || NM_001207 || || 689 || hHR029537 || 1407633	-0.25	-0.17	0.32	-0.18	0.31	0.19	1.19	1.17	0.91	1.25	0.65	0.62	0.67	0.9	0.505	0.52	0.31	0.18	0.21	0.54	-0.56	1.76
8361	hSQ004716	|| HIST1H4F || Histone cluster 1, H4f || Hs.247816 || NM_003540 || || 8361 || hHR021952 || 1407770	-0.68	-0.63	0.54	0.1	0.3	0.41	0.95	0.47	1.38	1.28	1.67	0.95	-0.59	1.46	3.555	3.19	3.64	3.18	2.31	2.92	3.77	2.79
129642	hSQ037742	|| MBOAT2 || Membrane bound O-acyltransferase domain containing 2 || Hs.467634 || NM_138799 || || 129642 || hHR012213 || 1407810	-1.16	-1.1	-0.62	-0.77	-0.77	-0.68	-2.08	-2.06	-1.42	-1.27	-1.57	-1.04	-0.59	-1.31	-2.295	-3.12	-1.71	-0.35	-1.47	-1.4	-1.57	-0.94
6908	hSQ012541	|| TBP || TATA box binding protein || Hs.590872 || NM_003194 || || 6908 || hCM000835 || 1407825	0.46	0.45	-0.01	-0.06	0.31	0.14	0.66	0.76	0.73	0.86	0.17	0.1	0.38	0.2	0.645	0.52	1.19	1.15	0.56	1.26	1.46	0.88
388975	hSQ039284	|| || || || XM_371514 || || || hHR031703 || 1407845	0.21	0.03	0.64	-0.11	-0.11	-0.27	1.22	1.27	1.27	1.2	1.04	-0.37	0.15	0.52	1.355	1.28	0.7	-6.71e-10	0.34	0.08	1.18	1.53
440388	hSQ023529	|| || || || XM_496170 || || || hHR009106 || 1407997	-0.92	-1.04	-0.47	-0.7	-0.48	-0.85	0.02	0.12	0.66	0.65	0.19	-0.03	-0.29	0.65	-0.205	-0.11	0.17	-0.16	0.07	0.4	0.42	0.46
389425	hSQ009648	|| || || || XM_371843 || || || hHR029801 || 1408000	-0.08	0.02	0.2	-0.08	0.13	0.39	1.97	1.62	1.79	1.78	0.81	0.26	0.68	1.98	0.605	0.82	0.35	0.38	1.17	1.55	0.29	1.56
348926	hSQ038780	|| LOC348926 || Hypothetical protein LOC348926 || Hs.591720 || BC044637 || || 348926 || hHR031947 || 1408060	1.22	1.12	1.32	0.87	0.58	0.72	1	1.07	0.8	0.89	0.7	0.14	0.65	-0.25	0.465	0.55	0.08	-0.32	-0.29	-0.31	0.34	1.15
51154	hSQ020088	|| MRTO4 || MRNA turnover 4 homolog (S. cerevisiae) || Hs.463797 || NM_016183 || || 51154 || hHR025353 || 1408081	-1.23	-1.37	-1.33	-1.66	-1.53	-1.44	0.38	0.04	-0.23	-0.57	0.05	-1.47	-0.14	-0.46	-1.505	-1.7	-2.45	-2.84	-1.34	-1.27	-1.47	-1.8
442158	hSQ001632	|| || || || XM_498040 || || || hHR029320 || 1408091	-0.67	-0.67	0.07	-0.86	-0.17	-0.45	1.14	1.19	1.07	1.29	0.6	0.12	-0.04	0.77	0.275	-0.01	-0.79	-0.91	-0.37	-0.09	-0.76	1.19
6302	hSQ016535	|| TSPAN31 || Tetraspanin 31 || Hs.632708 || NM_005981 || || 6302 || hHR013457 || 1408124	-1.04	-1.29	-1.18	-1.4	-1.36	-1.36	-0.46	-0.41	-0.52	-0.36	-0.72	-1.05	-0.27	-0.53	0.485	0.37	1.18	0.42	0.29	0.05	0.61	0.25
3251	hSQ038092	|| HPRT1 || Hypoxanthine phosphoribosyltransferase 1 (Lesch-Nyhan syndrome) || Hs.412707 || NM_000194 || || 3251 || hCM000792 || 1408256	-1.66	-1.65	-1.55	-1.65	-1.21	-1.31	0.01	0.16	1	1.12	-0.31	-0.49	-0.37	0.37	0.545	0.37	0.94	0.61	0.95	0.52	0.33	0.1
388132	hSQ034389	|| || || || NM_001007539 || || || hHR029574 || 1408359	1.51	1.71	0.98	0.41	1.64	1.89	3.16	3.2	2.86	3.03	2.31	1.93	2.53	3.25	-0.185	-0.02	-1.28	-1.24	0.02	0.56	-1.44	-0.69
253665	hSQ002850	|| || || || XM_171447 || || || hHR028391 || 1408435	-0.7	-0.82	0.04	-0.18	0.06	0.31	1.19	0.53	0.64	0.94	0.83	-0.13	-0.27	0.86	0.885	0.56	0.04	-0.55	-0.53	-0.15	0.41	0.52
148206	hSQ011523	|| || || || BC037782 || || || hHR026601 || 1408455	0.13	5.96e-09	-0.04	-0.15	-0.13	-0.1	0.5	0.07	0.15	-0.05	0.01	-0.44	-0.01	-0.06	0.855	0.84	0.23	0.08	-0.22	-0.33	-0.22	-1.14
91750	hSQ012367	|| LIN52 || Lin-52 homolog (C. elegans) || Hs.612866 || AK055422 || || 91750 || hHR031018 || 1408482	-0.61	-0.63	-0.06	-0.12	-0.06	0.1	-0.02	0.08	0.06	-0.02	0.08	-0.47	0.12	-0.21	1.305	1.38	1.48	1.73	1.26	1.46	1.52	1.34
442328	hSQ010657	|| || || || || || || hHR025855 || 1408508	0.4	0.09	0.3	-0.11	0.33	0.24	0.61	0.46	0.12	0.43	0.84	-0.28	-0.15	-0.06	-0.795	-0.1	-0.77	-1.29	-0.75	-0.38	0.61	0.53
4170	hSQ028590	|| MCL1 || Myeloid cell leukemia sequence 1 (BCL2-related) || Hs.632486 || NM_021960 || || 4170 || hHR019950 || 1408523	-1.64	-1.74	-1.27	-1.67	-1.22	-1.12	-1.68	-1.34	-1.66	-1.43	-1.23	-1.58	-1.05	-1.05	-1.295	-1.46	-1.13	-1.56	-0.54	-0.08	-0.37	0.16
9371	hSQ026445	|| KIF3B || Kinesin family member 3B || Hs.369670 || NM_004798 || || 9371 || hHR007356 || 1408531	1.5	1.73	0.51	0.24	1.81	1.67	1.06	1.34	-0.19	-0.22	-0.35	0.27	1.14	0.05	-0.165	-0.42	0.02	0.13	-0.02	-0.08	-0.35	-0.84
342659	hSQ029853	|| || || || XM_292664 || || || hHR025998 || 1408542	-0.18	0.11	0.47	0.32	0.82	0.55	1.51	1.54	0.94	1.24	0.48	0.38	0.58	0.81	-1.425	-1.63	-3.72	-3.48	-1.31	-0.56	-1.83	0.1
224	hSQ000335	|| ALDH3A2 || Aldehyde dehydrogenase 3 family, member A2 || Hs.499886 || NM_000382 || || 224 || hHR003859 || 1408547	-1	-0.76	-0.86	-0.91	-0.69	-0.69	-0.94	-0.88	-0.59	-0.35	-0.93	-0.43	0.08	-0.05	-0.965	-0.81	-0.39	-0.59	0.13	-0.18	-0.56	-1.5
85028	hSQ043570	|| C1orf79 || Chromosome 1 open reading frame 79 || Hs.632377 || AK092096 || || 85028 || hHR008861 || 1408548	-1.17	-1.39	-1.22	-2.1	-1.05	-1.5	-0.17	0.02	-1.3	-0.98	-1.57	-2.26	-0.68	-2.22	-1.135	-1.3	-2.24	-2.33	-0.85	-0.74	-1.17	-1.45
440027	hSQ034359	|| || || || XM_495867 || || || hHR029670 || 1408552	1.09	1.35	1.07	0.53	1.38	1.44	2.92	2.94	1.85	2.04	1.84	1.2	1.5	2.06	0.265	0.34	-0.77	-1.24	-0.34	-0.11	-1.55	-0.88
390856	hSQ044110	|| || || || XM_497590 || || || hHR018807 || 1408576	-0.66	-0.83	-0.29	-0.68	-0.15	-0.03	0.38	0.35	0.05	0.65	0.19	-0.37	-0.37	-0.05	-0.035	0.03	-0.7	-1.21	-0.86	0.02	-0.93	0.7
123803	hSQ012937	|| NTAN1 || N-terminal asparagine amidase || Hs.592045 || NM_173474 || || 123803 || hHR023652 || 1408651	-0.65	-0.65	0.01	-0.45	-0.01	0.13	1.05	1	1.06	1.02	0.62	-0.45	0.43	0.2	1.365	1.37	1.83	1.18	1.46	1.07	1.37	2.8
2171	hSQ043307	|| FABP5 || Fatty acid binding protein 5 (psoriasis-associated) || Hs.408061 || NM_001444 || || 2171 || hHR031203 || 1408697	-1.43	-1.32	-0.81	-1.46	-0.95	-0.95	0.87	0.71	0.59	0.91	-0.14	-0.32	-0.02	0.18	-0.085	-0.23	-0.51	-1.06	-0.33	-0.27	-1.69	0.53
8848	hSQ000424	|| TSC22D1 || TSC22 domain family, member 1 || Hs.507916 || NM_183422 || || 8848 || hHR005421 || 1408720	7.15e-09	0.19	-0.14	-0.42	-0.15	-0.04	0.74	0.71	1.02	1.07	0.52	0.15	0.51	0.71	1.305	1.32	1.9	1.53	1.25	1.1	0.92	1.73
8563	hSQ042029	|| THOC5 || THO complex 5 || Hs.75361 || NM_003678 || || 8563 || hHR020264 || 1408744	1.48	1.46	0.95	0.68	1.1	0.89	1.54	1.59	0.85	0.77	1.32	0.52	1.38	0.8	0.565	0.19	-0.24	0.29	0.31	0.14	0.48	0.47
6189	hSQ021299	|| RPS3A || Ribosomal protein S3A || Hs.356572 || NM_001006 || || 6189 || hHR029967 || 1408815	-0.62	-0.28	-0.32	-1.02	0.27	0.27	0.78	0.42	-0.1	0.28	0.07	0.03	0.02	1.59	-1.015	-1.04	-0.96	-1.38	-0.08	-0.19	-2.19	-0.95
8337	hSQ034842	|| HIST2H2AA3 || Histone cluster 2, H2aa3 || Hs.530461 || NM_003516 || || 8337 || hHR032177 || 1408866	-0.94	-0.84	-0.63	-0.69	-0.57	-0.39	0.69	0.69	0.81	0.51	0.87	-0.22	-0.2	0.44	1.485	1.46	1.9	1	0.85	0.79	1.15	0.88
57169	hSQ032757	|| ZNFX1 || Zinc finger, NFX1-type containing 1 || Hs.371794 || NM_021035 || || 57169 || hHR010258 || 1408870	0.03	0.1	0.04	0.04	0.47	0.45	-0.4	0.12	-0.46	-0.79	-0.91	-0.81	-0.15	-1.43	2.835	2.57	2	1.81	1.85	1.62	2.02	2.41
442341	hSQ029109	|| || similar to hypothetical protein LOC51255 || || || || || hHR027696 || 1408886	0.72	0.67	0.61	0.53	0.93	0.97	1.79	1.75	1.46	1.5	1.58	0.66	0.59	1.69	0.615	0.38	0.07	0.11	-0.24	0.43	-0.1	0.69
90231	hSQ043224	|| KIAA2013 || KIAA2013 || Hs.520094 || NM_138346 || || 90231 || hHR031311 || 1408895	0.3	0.24	0.06	-0.6	-0.66	-0.39	0.51	0.31	0.45	0.1	0.63	-0.81	-0.24	-0.51	0.815	0.88	0.94	-0.04	0.1	0.12	1.01	0.35
114971	hSQ005239	|| PTPMT1 || Protein tyrosine phosphatase, mitochondrial 1 || Hs.657636 || BC014048 || || 114971 || hHR013548 || 1408896	-0.49	-0.42	-0.21	-0.71	-0.31	-0.68	-0.89	-0.47	-0.31	-0.28	-0.38	-0.3	0.16	-0.7	-0.475	-0.87	-0.37	-0.53	0.06	-0.57	-0.35	0.12
81875	hSQ017831	|| ISG20L2 || Interferon stimulated exonuclease gene 20kDa-like 2 || Hs.301904 || NM_030980 || || 81875 || hHR022700 || 1408944	0.64	0.6	0.78	0.36	0.67	0.81	1.01	0.66	0.72	0.38	0.52	-0.03	0.88	0.1	-0.575	-0.18	-0.2	0.02	-0.05	-0.17	0.42	0.74
6389	hSQ038011	|| SDHA || Succinate dehydrogenase complex, subunit A, flavoprotein (Fp) || Hs.440475 || NM_004168 || || 6389 || hCM001132 || 1408949	0.19	0.18	-0.01	-0.19	-0.24	-0.52	0.03	0.18	-0.44	0.12	-0.27	-0.58	0.1	-1.04	-1.355	-1.2	-1.55	-1.15	0.34	0.51	-0.14	0.72
55239	hSQ003887	|| OGFOD1 || 2-oxoglutarate and iron-dependent oxygenase domain containing 1 || Hs.231883 || NM_018233 || || 55239 || hHR004332 || 1408968	0.51	0.56	0.06	-0.17	0.92	0.78	-0.28	-0.11	-0.58	-0.19	0.07	0.16	0.94	0.44	0.425	0.37	0.48	0.77	0.63	0.29	0.45	1.15
26292	hSQ038365	|| MYCBP || C-myc binding protein || Hs.591506 || NM_012333 || || 26292 || hHR025618 || 1409046	0.25	-0.06	0.01	-0.03	0.05	0.13	0.46	0.52	1.1	1.03	0.44	0.12	0.37	0.03	-0.345	-0.24	-0.21	-0.68	-0.24	-0.65	-0.32	0.95
3251	hSQ016510	|| HPRT1 || Hypoxanthine phosphoribosyltransferase 1 (Lesch-Nyhan syndrome) || Hs.412707 || NM_000194 || || 3251 || hCM000890 || 1409066	-1.66	-1.65	-1.38	-1.41	-1.22	-1.16	0.1	-0.03	0.76	0.94	-0.16	-0.28	-0.68	-0.03	0.025	-0.33	0.74	0.44	0.73	0.53	0.01	0.45
57108	hSQ000879	|| || || || NG_003193 || || || hHR030260 || 1409073	0.17	0.39	-0.21	-0.62	-0.54	0.18	1.11	1.15	-0.21	0.17	-0.44	-1.04	0.4	-0.87	0.495	0.13	0.54	-0.01	0.44	-0.11	-0.11	0.75
55719	hSQ035519	|| C10orf6 || Chromosome 10 open reading frame 6 || Hs.447458 || NM_018121 || || 55719 || hHR007232 || 1409106	-0.88	-0.84	-0.79	-1.36	-1.1	-1.38	-0.74	-0.53	-0.54	-0.5	-0.57	-0.97	-0.5	-1	0.715	0.37	0.62	0.14	0.49	0.03	0.55	0.18
25977	hSQ011142	|| NECAP1 || NECAP endocytosis associated 1 || Hs.555927 || NM_015509 || || 25977 || hHR027240 || 1409158	-0.46	-0.49	-0.42	-0.12	0.14	-0.08	0.22	0.1	0.58	0.73	-0.08	-0.11	0.18	0.08	0.785	0.66	1.3	1.12	1	0.96	0.95	2.47
81609	hSQ042383	|| SNX27 || Sorting nexin family member 27 || Hs.192326 || NM_030918 || || 81609 || hHR006138 || 1409162	-1.36	-1.16	-1.15	-1.07	-0.54	-0.56	-1.58	-1.88	-1.96	-1.38	-2.36	-1.49	-0.82	-1.53	-1.285	-1.32	-0.7	-1.74	-0.96	-1.05	-1.55	-1.15
157247	hSQ032570	|| MGC27345 || Hypothetical protein MGC27345 || Hs.552129 || BC024231 || || 157247 || hHR014224 || 1409177	-1.31	-1.35	-1.8	-1.86	-1.58	-1.86	-1.36	-1.27	-2.21	-2.13	-2.1	-2.14	-1.44	-3.44	-0.185	-0.44	-0.96	-1.1	-1.06	-1.6	-0.35	-1.56
4564	hSQ044451	|| || || || NC_001807 || || || hHR030962 || 1409194	4.57	4.6	3.41	2.95	4.4	4.52	3.04	3.06	2.3	2.27	3.96	3.62	2.48	2.31	1.865	1.91	1.75	1.77	-0.2	0.67	0.88	3.25
130355	hSQ014886	|| LOC130355 || Hypothetical protein LOC130355 || Hs.99488 || BC047365 || || 130355 || hHR005140 || 1409235	-0.64	-0.47	0.35	0.07	0.38	0.08	1.72	1.52	1.35	1.57	0.39	0.52	0.84	1.36	0.345	0.67	-0.32	-0.24	-0.02	-0.04	-0.76	1.2
84992	hSQ035176	|| PIGY || Phosphatidylinositol glycan anchor biosynthesis, class Y || Hs.648007 || NM_032906 || || 84992 || hHR029615 || 1409258	-1.15	-0.8	-0.22	-0.7	-0.15	-0.24	0.24	0.1	0.53	0.95	-0.21	-0.29	-0.26	1.06	0.015	0.35	-0.19	-0.47	0.06	-0.05	-0.88	-0.32
150465	hSQ037009	|| TTL || Tubulin tyrosine ligase || Hs.358997 || NM_153712 || || 150465 || hHR025006 || 1409340	0.48	0.55	0.23	0.13	0.54	0.85	-3.11	-3.07	-2.17	-3.92	-0.07	-0.23	-0.07	-0.03	-1.465	-1.33	-0.81	-0.26	-0.14	0.17	-0.05	-0.95
56271	hSQ032749	|| BEXL1 || Brain expressed X-linked-like 1 || Hs.184736 || BC015794 || || 56271 || hHR009900 || 1409354	-1.15	-1.03	-0.74	-1.2	-0.93	-0.75	-0.45	-0.4	-0.49	-0.25	-1.05	-1.21	0.05	0.23	-1.445	-1.11	-1.94	-1.54	-0.19	-0.51	-1.05	-0.86
5706	hSQ032367	|| PSMC6 || Proteasome (prosome, macropain) 26S subunit, ATPase, 6 || Hs.156171 || NM_002806 || || 5706 || hHR029235 || 1409388	7.15e-09	0.29	-0.18	-0.44	0.17	0.6	1.15	1.11	0.87	1.07	0.34	0.61	0.42	0.98	-0.275	-0.32	0.22	-0.22	0.65	0.73	-0.13	0.61
29107	hSQ038338	|| NXT1 || NTF2-like export factor 1 || Hs.516933 || NM_013248 || || 29107 || hHR014603 || 1409392	-1.21	-1.14	-0.01	-0.34	0.03	0.35	0.52	0.64	1.1	1.28	0.45	-0.33	0.29	1.18	1.775	1.78	1.81	1.23	0.65	0.52	1.84	1
3251	hSQ021310	|| HPRT1 || Hypoxanthine phosphoribosyltransferase 1 (Lesch-Nyhan syndrome) || Hs.412707 || NM_000194 || || 3251 || hCM001043 || 1409455	-2.14	-1.95	-0.71	-1.19	-0.78	-1.1	-0.28	-0.44	0.53	0.87	-0.76	-0.41	-0.6	-0.02	0.055	-0.24	0.66	-0.23	0.55	0.63	-0.14	1.11
200030	hSQ011186	|| NBPF11 || Neuroblastoma breakpoint family, member 11 || Hs.636561 || NM_183372 || || 200030 || hHR030532 || 1409461	-0.61	-0.54	-1.03	-1.6	-1.14	-0.8	-0.73	-1.1	-1.2	-0.96	-1.74	-1.81	-0.65	-1.28	0.255	-0.07	0.13	-0.14	0.31	-0.37	0.08	-0.56
345829	hSQ028642	|| || || || XM_293984 || || || hHR028791 || 1409480	-0.26	-0.32	-0.06	-0.15	0.06	0.03	0.97	1.18	0.87	1.1	0.9	0.49	0.54	0.53	0.005	0.21	0.06	-0.22	2.24e-10	0.54	-0.29	1.45
81689	hSQ021440	|| ISCA1 || Iron-sulfur cluster assembly 1 homolog (S. cerevisiae) || Hs.449291 || NM_030940 || || 81689 || hHR029805 || 1409486	-0.94	-0.62	-0.01	-0.5	-0.25	-0.01	0.31	0.17	0.47	0.76	-0.69	-0.48	0.26	0.28	1.415	1.57	1.39	0.79	1.26	1.04	0.59	1.36
80772	hSQ038396	|| MGC10334 || Hypothetical protein MGC10334 || Hs.515689 || BC072454 || || 80772 || hHR031797 || 1409499	1.57	1.4	1.12	0.74	0.76	1.04	1.53	1.47	1.63	1.43	2.04	0.47	0.64	0.98	3.005	2.7	2.49	1.61	0.59	-0.14	2.48	-0.07
63933	hSQ032544	|| || || || NM_022102 || || || hHR021067 || 1409507	-1.75	-1.76	-1.63	-1.7	-1.21	-1.17	0.43	0.33	0.37	0.59	-0.18	-0.74	-0.4	0.05	-0.395	-0.14	-0.45	-0.7	-0.25	-0.02	-1.14	0.44
2509	hSQ003920	|| FTHP1 || Ferritin, heavy polypeptide pseudogene 1 || Hs.453583 || J04755 || || 2509 || hHR029903 || 1409517	0.03	0.27	0.97	0.17	0.33	0.63	0.19	0.31	0.3	0.73	-0.26	-0.34	0.87	0.75	0.005	0.39	-0.14	-0.25	0.41	0.45	-0.04	0.55
440798	hSQ021273	|| DKFZp434N035 || hypothetical protein DKFZp434N035 || || || || 84222 || hHR029308 || 1409568	0.12	0.07	0.76	0.45	0.41	0.18	1.06	1.1	1.09	0.53	1.43	0.27	-0.07	0.67	1.375	1.36	0.74	0.14	-0.23	-0.52	0.97	0.05
56757	hSQ031032	|| LOC56757 || Hypothetical protein LOC56757 || Hs.592566 || AL833381 || || 56757 || hHR013438 || 1409604	0.45	0.21	0.1	0.04	0.01	0.01	-0.86	-0.46	-0.87	-0.8	-0.98	-0.59	0.04	-0.78	-0.155	-0.25	-0.5	-0.16	-0.47	-0.57	0.07	-0.58
349410	hSQ034206	|| CXYorf1 || Chromosomes X and Y open reading frame 1 || Hs.446466 || BC029274 || || 653440 || hHR030720 || 1409694	-1.58	-1.33	-0.78	-1.4	-1.08	-1.03	-0.93	-0.86	-1.47	-1.38	-1.03	-2.22	-0.8	-1.43	-0.845	-0.39	-0.82	-1.9	-0.07	-0.85	-0.08	-0.89
153339	hSQ009639	|| TMEM167 || Transmembrane protein 167 || Hs.355606 || NM_174909 || || 153339 || hHR030819 || 1409734	-2.26	-2.18	-1.46	-1.84	-1.42	-1.23	0.24	0.02	0.49	0.69	-0.41	-0.44	-1.02	0.36	0.555	0.38	0.95	0.29	0.55	0.2	-0.06	0.84
55916	hSQ010177	|| NXT2 || Nuclear transport factor 2-like export factor 2 || Hs.25010 || NM_018698 || || 55916 || hHR004658 || 1409759	-0.75	-0.63	-0.45	-0.68	-0.24	-0.52	-0.01	0.08	0.73	0.94	0.19	0.2	-0.33	0.37	0.765	0.18	0.7	0.59	0.13	0.14	0.47	-0.14
1432	hSQ026626	|| MAPK14 || Mitogen-activated protein kinase 14 || Hs.588289 || NM_001315 || || 1432 || hHR007027 || 1409799	-0.65	-0.59	-0.59	-0.8	-0.61	-0.39	-0.52	-0.17	-0.05	-0.12	-0.32	-0.56	0.2	-0.24	0.675	0.74	1.09	1.1	1	0.61	0.91	0.57
1120	hSQ039491	|| CPT1B || Carnitine palmitoyltransferase 1B (muscle) || Hs.439777 || NM_152253 || || 1375 || hHR008510 || 1409806	-2.17	-2.16	-1.97	-1.69	-2.34	-3.97	-1.35	-1.47	-2.77	-2.41	-2.39	-2.14	-1.72	-3.53	1.155	0.85	0.79	0.52	0.61	0.23	1.53	0.8
50861	hSQ037815	|| STMN3 || Stathmin-like 3 || Hs.639609 || NM_015894 || || 50861 || hHR029474 || 1409807	0.29	0.27	0.01	-0.25	0.12	-0.28	0.74	0.49	0.48	0.09	0.87	-0.66	0.07	-0.21	0.535	0.42	0.45	-0.27	-0.14	-1.37	1.07	-1.64
79017	hSQ001699	|| C7orf24 || Chromosome 7 open reading frame 24 || Hs.530024 || NM_024051 || || 79017 || hHR015039 || 1409814	-2.82	-2.68	-1.79	-1.75	-2.18	-2.52	-0.74	-0.58	-0.24	-0.18	-1.61	-1.31	-0.64	-1.15	-1.835	-1.77	-1.48	-1.86	-0.71	-0.81	-2.33	-0.27
1139	hSQ044255	|| CHRNA7 || Cholinergic receptor, nicotinic, alpha 7 || Hs.511772 || NM_000746 || || 1139 || hHR031548 || 1409877	-0.68	-0.09	0.54	0.17	0.31	0.32	-1.19	-0.78	-0.98	-1.22	-1.42	-0.85	-0.64	-1.21	-0.175	0.03	0.53	0.6	0.09	-0.11	0.41	0.33
2535	hSQ012452	|| FZD2 || Frizzled homolog 2 (Drosophila) || Hs.142912 || NM_001466 || || 2535 || hHR012993 || 1409935	-0.03	-0.09	0.64	0.24	0.15	0.22	-0.14	-0.38	-0.04	-0.33	0.18	-0.9	0.02	-0.44	1.055	1.26	0.91	0.19	-0.13	-0.63	0.8	0.24
375757	hSQ036759	|| C9orf119 || Chromosome 9 open reading frame 119 || Hs.259594 || BC029911 || || 375757 || hHR014301 || 1409946	-0.89	-1.05	-0.72	-1.07	-0.45	-0.59	0.44	0.46	0.34	0.49	-0.11	-0.77	0.3	0.2	-0.995	-1	-2.21	-2.98	-0.88	-0.48	-0.94	0.6
894	hSQ032607	|| CCND2 || Cyclin D2 || Hs.376071 || NM_001759 || || 894 || hHR007340 || 1410012	-0.98	-0.89	-0.59	-1.12	-0.8	-0.89	-0.74	-0.66	-0.86	-0.89	-1.29	-1.11	-0.22	-0.79	-0.425	-0.3	-0.65	-0.58	-0.2	-0.54	-0.76	0.99
3251	hSQ021141	|| HPRT1 || Hypoxanthine phosphoribosyltransferase 1 (Lesch-Nyhan syndrome) || Hs.412707 || NM_000194 || || 3251 || hCM000968 || 1410018	-1.69	-1.64	-1.7	-1.55	-1.63	-1.43	0.53	0.62	0.96	1.12	-0.12	-0.46	-0.41	0.39	0.625	0.54	1.19	0.84	0.93	0.66	-0.04	-0.11
56993	hSQ004596	|| TOMM22 || Translocase of outer mitochondrial membrane 22 homolog (yeast) || Hs.595072 || NM_020243 || || 56993 || hHR028011 || 1410053	-0.27	-0.27	0.03	-0.31	7.15e-09	0.19	0.61	0.59	0.93	1.2	0.45	0.11	-0.06	0.36	0.245	0.01	0.17	-0.39	0.05	0.29	0.39	1.39
441236	hSQ019585	|| || || || XM_496881 || || || hHR031755 || 1410102	-1.43	-1.56	-1.75	-1.52	-2.21	-2.61	-2.3	-2.5	-2.2	-2.35	-2.09	-2.86	-1.98	-3	0.085	-0.13	-0.18	-0.28	-0.24	-0.3	0.94	-0.25
10901	hSQ010511	|| DHRS4 || Dehydrogenase/reductase (SDR family) member 4 || Hs.528385 || NM_021004 || || 10901 || hHR031084 || 1410148	-0.5	-0.63	0.26	-0.48	-0.14	-0.31	-0.03	0.08	-0.44	-0.01	-0.46	-1.04	0.03	-0.32	-1.325	-1.08	-1.83	-1.95	-0.55	-0.8	-1.16	-0.37
5597	hSQ004820	|| MAPK6 || Mitogen-activated protein kinase 6 || Hs.411847 || NM_002748 || || 5597 || hHR029272 || 1410170	-0.88	-0.72	-0.77	-0.76	-0.41	-0.49	-0.54	-0.68	-0.03	0.25	-0.67	-0.21	-0.37	0.15	-0.235	-0.63	-0.03	-0.11	0.34	0.28	-0.19	0.42
389727	hSQ010789	|| || || || XM_372092 || || || hHR031207 || 1410194	0.73	0.59	0.11	0.22	0.53	0.76	-0.13	0.01	-1.21	-1.02	1.4	-0.14	0.67	0.41	-1.175	-0.89	-1.5	-1.56	-0.71	-0.48	-0.93	-0.78
2593	hSQ018426	|| GAMT || Guanidinoacetate N-methyltransferase || Hs.81131 || NM_000156 || || 2593 || hHR018051 || 1410199	-0.46	-0.71	0.01	-0.71	-0.34	-0.14	0.72	0.8	0.61	0.48	0.9	-0.35	-0.47	0.81	1.905	1.75	1.59	0.77	-0.04	-0.11	1.9	1.64
204	hSQ042239	|| AK2 || Adenylate kinase 2 || Hs.470907 || NM_013411 || || 204 || hHR012610 || 1410296	0.49	0.33	-0.24	0.07	0.3	0.08	-2.92	-3.18	-2.45	-3.48	-0.56	-0.6	-0.07	-0.58	-1.855	-1.39	-1.01	-0.87	-0.33	-0.17	-0.04	-0.05
10146	hSQ010708	|| G3BP1 || GTPase activating protein (SH3 domain) binding protein 1 || Hs.587054 || NM_005754 || || 10146 || hHR027579 || 1410340	0.28	0.36	-0.14	-0.36	0.46	0.71	1.19	1.19	0.85	1.16	0.35	0.56	0.42	0.82	0.375	0	0.42	0.09	0.33	-0.07	0.33	1.43
29801	hSQ016669	|| ZDHHC8 || Zinc finger, DHHC-type containing 8 || Hs.63128 || NM_013373 || || 29801 || hHR025459 || 1410354	1.48	1.34	1.42	0.74	0.46	0.41	1.77	1.96	1.08	0.55	1.36	0.04	0.4	-0.29	1.265	1.23	1.17	0.06	-0.28	-0.81	0.86	-0.33
388161	hSQ040468	|| LOC388152 || Hypothetical protein FLJ90297 || Hs.405809 || BC054509 || || 388152 || hHR032189 || 1410360	-0.08	-0.13	-0.23	-0.84	-0.63	-0.95	-0.29	-0.05	-0.16	-0.33	-0.28	-1.49	-0.1	-1.55	0.025	-0.03	-1.27	-1.32	-0.32	-0.86	0.24	-0.02
57510	hSQ025244	|| XPO5 || Exportin 5 || Hs.203206 || NM_020750 || || 57510 || hHR010265 || 1410362	0.08	0.29	-0.11	-0.35	0.51	0.35	-0.58	-0.8	-1.41	-0.93	-1.16	-0.63	-0.19	-0.72	-0.455	-0.7	-0.85	-0.41	-0.27	-0.31	-0.26	-0.82
441224	hSQ041217	|| || similar to hypothetical protein LOC349114 || || || || || hHR031300 || 1410376	-1.51	-1.53	-1.94	-2.37	-2.64	-2.69	-2.07	-2.01	-2.06	-2.04	-1.87	-3.36	-1.67	-3.91	0.725	0.31	0.55	0.1	0.22	-0.35	1.23	-1.09
92806	hSQ030360	|| MGC16385 || Hypothetical protein MGC16385 || Hs.513832 || NM_145039 || || 92806 || hHR013522 || 1410379	-1.02	-0.94	-0.8	-0.98	-1.6	-0.95	-0.44	-0.76	-1.06	-1.12	-1.73	-1.15	-0.82	-3.92	-1.975	-2.06	-4.08	-2.69	-1.31	-1.42	-1.13	-1.25
29979	hSQ025334	|| UBQLN1 || Ubiquilin 1 || Hs.9589 || NM_013438 || || 29979 || hHR002035 || 1410413	-1.9	-1.76	-1.08	-1.41	-1.23	-1.42	-1.36	-1.89	-1.26	-0.63	-1.77	-1.1	-0.85	-0.55	-1.305	-1.31	-0.95	-0.85	0.12	-0.13	-1.44	0.31
6835	hSQ033716	|| SURF2 || Surfeit 2 || Hs.159448 || NM_017503 || || 6835 || hHR028894 || 1410449	-0.96	-1	-0.84	-1.44	-0.78	-0.68	1.08	0.91	0.02	0.09	0.1	-1.01	0.52	0.04	-1.165	-1.21	-2.55	-3.05	-1.15	-1.25	-1.34	-1.22
343515	hSQ014917	|| || || || XM_497670 || || || hHR027155 || 1410462	1.16	1.35	0.84	0.88	1.53	1.5	1.96	2.34	0.92	0.88	1.55	1.29	1.8	1.06	-0.635	-0.91	-0.92	-1.21	-0.16	0.46	-0.47	-0.15
6389	hSQ043650	|| SDHA || Succinate dehydrogenase complex, subunit A, flavoprotein (Fp) || Hs.440475 || NM_004168 || || 6389 || hCM000883 || 1410547	0.14	0.16	-0.36	-0.61	-0.87	-1.1	0.54	0.75	0.06	0.25	0.29	-0.62	0.49	-0.42	-0.665	-0.71	-0.75	-0.69	0.67	0.47	0.19	-0.09
60	hSQ025392	|| ACTB || Actin, beta || Hs.520640 || NM_001101 || || 60 || hCP000001 || 1410642	1.4	1.35	1.82	1.15	0.89	1.09	1.75	1.85	1.36	1.64	1.17	0.35	0.48	0.11	0.565	0.69	0.71	0.18	0.25	0.49	0.35	2.96
4952	hSQ022624	|| OCRL || oculocerebrorenal syndrome of Lowe || Hs.126357 || || || 4952 || hCT001259 || 1410651	0.96	0.79	0.86	0.47	0.82	0.84	1.48	1.71	1.47	1.4	1.23	0.92	0.98	1.05	2.325	1.9	1.56	1.29	0.7	0.3	1.46	1.05
347424	hSQ031315	|| || || || XM_293342 || || || hHR028524 || 1410724	-0.52	-0.21	-0.72	-1.28	0.08	0.37	1.73	1.78	0.18	0.35	-0.05	0.09	1.49	0.38	-1.545	-1.64	-2.12	-1.55	-0.03	-0.23	-2.03	-0.58
3251	hSQ044524	|| HPRT1 || Hypoxanthine phosphoribosyltransferase 1 (Lesch-Nyhan syndrome) || Hs.412707 || NM_000194 || || 3251 || hCM000938 || 1410746	-1.79	-1.67	-1.21	-0.91	-0.91	-1.27	-0.23	0.09	0.6	0.98	-0.28	-0.26	-0.71	-0.28	-0.125	-0.17	0.45	0.04	0.38	0.61	-0.07	0.57
442332	hSQ034804	|| || || || || || || hHR025903 || 1410757	-0.19	-0.08	0.29	-0.22	0.13	0.33	0.11	0.12	0.59	0.8	0.56	0.27	0.34	1.08	-0.515	-0.44	-0.37	-0.65	0.15	0.68	-0.75	1.19
8345	hSQ026954	|| HIST1H2BH || Histone cluster 1, H2bh || Hs.247815 || NM_003524 || || 8345 || hHR027963 || 1410784	0.9	0.75	0.72	1.06	1.12	1.17	1.19	1.36	1.01	1.08	1.32	0.96	0.5	0.6	0.365	0.44	0.86	0.48	0.52	0.9	0.36	0.94
388345	hSQ042982	|| || || || XM_371024 || || || hHR029700 || 1410803	-0.89	-0.75	-0.83	-1.2	-0.69	-0.9	-0.08	0.14	0.58	0.65	0.08	-0.33	0.04	0.03	-0.385	-0.4	-0.26	-0.39	0.64	0.27	-0.6	0.77
387680	hSQ001757	|| RP11-56A21.1 || Similar to KIAA0592 protein || Hs.645272 || NM_001005751 || || 387680 || hHR031692 || 1410827	0.5	0.69	-0.26	-0.58	0.15	0.23	0.28	0.59	-0.11	-0.11	-0.28	-0.37	0.47	-0.13	-0.785	-0.85	-1.13	-1.05	0.09	-0.39	-0.67	0.63
442133	hSQ022056	|| || || || XM_497997 || || || hHR024969 || 1410846	0.52	0.68	0.12	0.02	0.02	0.41	0.12	0.04	0.53	0.25	-0.02	0.02	0.96	0.58	0.095	-0.07	-0.04	0.38	0.32	0.26	0.5	0.3
84914	hSQ020168	|| ZNF587 || Zinc finger protein 587 || Hs.288995 || NM_032828 || || 84914 || hHR027392 || 1410876	-0.52	-0.65	-0.53	-0.54	-0.42	-0.37	1.03	0.93	0.96	0.84	0.51	-0.53	-0.63	-0.18	1.475	1.66	1.37	0.9	0.21	0.58	1.01	-0.11
440576	hSQ001115	|| || || || XM_496354 || || || hHR026732 || 1410888	-1.63	-1.66	-1.36	-1.52	-1.3	-1.28	0.28	-0.2	0.4	-0.27	0.12	-1	-0.5	0.49	-0.215	0.29	-0.06	-1.1	-0.15	0.4	0.51	0.06
55168	hSQ024204	|| MRPS18A || Mitochondrial ribosomal protein S18A || Hs.520149 || NM_018135 || || 55168 || hHR017901 || 1410921	0.6	0.63	0.91	0.52	0.92	0.91	2.63	2.44	2.22	2.05	2.3	1.04	1.26	1.5	2.085	1.99	1.84	0.93	0.62	0.39	1.68	1.23
3133	hSQ040799	|| HLA-E || Major histocompatibility complex, class I, E || Hs.650174 || NM_005516 || || 3133 || hHR026846 || 1410924	0.08	-0.07	0.39	0.16	-0.32	-0.36	0.31	0.3	0.43	0.33	0.54	-0.51	-0.3	-0.01	-1.195	-0.89	-1.31	-1.17	-0.87	-0.46	0.2	-0.69
124454	hSQ007836	|| EARS2 || Glutamyl-tRNA synthetase 2, mitochondrial (putative) || Hs.620541 || AL832489 || || 124454 || hHR008936 || 1410950	-0.28	-0.21	-0.66	-0.45	-0.54	-0.39	-0.37	-0.5	-0.77	-0.91	-0.65	-0.59	0.24	-0.89	-0.705	-0.49	-0.25	-0.13	0.11	-0.19	-0.39	0.42
55920	hSQ041960	|| RCC2 || Regulator of chromosome condensation 2 || Hs.380857 || NM_018715 || || 55920 || hHR030521 || 1410964	1.07	1.06	1.16	0.92	0.71	0.63	-0.07	0.04	0.08	0.2	0.44	0.2	0.93	-0.03	-0.785	-0.8	-1.1	-0.59	-0.02	0.08	0.25	1.79
8635	hSQ008786	|| RNASET2 || Ribonuclease T2 || Hs.529989 || NM_003730 || || 8635 || hHR026157 || 1410979	-0.36	-0.37	-0.03	-0.52	-0.3	-0.5	0.84	0.66	0.99	0.99	0.81	-0.24	0.51	0.12	-0.385	-0.22	-0.83	-1.18	-0.55	-0.69	-0.66	-0.35
143158	hSQ000198	|| || || || XM_084445 || || || hHR030628 || 1411004	-1.22	-1.5	-1.47	-1.57	-1.46	-2.64	-1.51	-2.07	-2.26	-3.05	-1.69	-2.74	-2.02	-4.64	-1.065	-1.01	-1.03	-1.74	-0.88	-1.2	-0.03	-1.46
154467	hSQ001077	|| C6orf129 || Chromosome 6 open reading frame 129 || Hs.284207 || BC003515 || || 154467 || hHR008170 || 1411061	0.64	0.69	0.56	0.32	0.63	0.83	2.35	2.52	2.05	1.81	1.91	0.94	1.22	1.95	1.365	0.95	-0.1	-0.69	-0.69	-0.15	-0.3	0.17
1431	hSQ011743	|| CS || Citrate synthase || Hs.430606 || NM_198324 || || 1431 || hHR029395 || 1411097	0.93	1.12	1.04	0.64	1.09	1.28	1.27	1.3	0.87	0.99	0.91	0.48	1.18	0.5	0.765	0.75	0.9	0.86	0.8	0.41	0.23	0.29
9304	hSQ039227	|| SNORD22 || Small nucleolar RNA, C/D box 22 || Hs.689079 || NR_000008 || || 9304 || hHR018224 || 1411121	-1.32	-1.28	-0.92	-1.28	-1.63	-1.71	-2.11	-2.19	-2.27	-4.19	-1.82	-2.22	-1.18	-2.96	-2.615	-2.23	-2.9	-3.23	-2.36	-2.15	-1.61	-2.88
390424	hSQ010564	|| || || || XM_497383 || || || hHR028204 || 1411165	0.2	0.27	0.6	0.58	0.72	0.85	1.1	0.7	1.51	1.75	1.12	0.84	0.23	1.57	1.455	1.11	0.69	0.64	-0.44	0.73	1.11	0.14
26022	hSQ031473	|| TMEM98 || Transmembrane protein 98 || Hs.3447 || NM_015544 || || 26022 || hHR026398 || 1411182	0.39	0.46	1.36	0.77	0.76	0.55	1.35	1.5	2.15	2.18	1.5	0.76	0.86	1.08	1.665	1.48	1.3	0.45	0.1	0.13	1.21	1.43
84278	hSQ014311	|| || || || NM_032318 || || || hHR028932 || 1411184	-0.53	-0.33	0.17	-0.29	0.32	0.33	0.29	0.2	0.73	0.39	0.63	-0.08	-0.06	0.68	0.795	0.71	0.74	0.28	-0.32	-0.01	0.72	-0.24
6830	hSQ032203	|| SUPT6H || Suppressor of Ty 6 homolog (S. cerevisiae) || Hs.250429 || NM_003170 || || 6830 || hHR019370 || 1411209	1.24	1.08	0.66	0.17	0.81	0.72	0.3	0.53	-0.57	-0.61	-0.39	-0.42	-0.29	-0.91	0.835	0.76	-0.44	-0.63	-0.49	-0.63	0.89	0.58
51115	hSQ030699	|| FAM82B || Family with sequence similarity 82, member B || Hs.145386 || NM_016033 || || 51115 || hHR004627 || 1411217	-1.09	-1.18	-1.48	-1.47	-1.22	-1.24	0.22	0.29	0.27	0.37	-0.19	-0.31	-0.55	0.41	0.125	0.29	0.88	0.39	0.87	0.48	-0.17	0.62
23155	hSQ009785	|| CLCC1 || Chloride channel CLIC-like 1 || Hs.658489 || NM_015127 || || 23155 || hHR004842 || 1411251	-1.95	-1.85	-1.83	-1.95	-1.8	-1.7	-1.12	-1.32	-1.37	-1.5	-2.49	-1.61	-0.55	-1.8	-2.155	-1.93	-1.62	-2.44	-0.82	-0.98	-2.68	-0.85
123720	hSQ030055	|| WHDC1 || WAS protein homology region 2 domain containing 1 || Hs.377360 || AK126887 || || 123720 || hHR008524 || 1411278	-0.7	-0.53	-0.65	-0.79	-0.22	0.03	0.14	-0.95	-1.72	-1.68	-0.71	-0.86	-0.23	-2.28	-0.405	-0.42	0.07	-0.19	0.11	0.09	-0.6	0.35
5928	hSQ027197	|| RBBP4 || Retinoblastoma binding protein 4 || Hs.647652 || NM_005610 || || 5928 || hHR030290 || 1411290	0.67	0.8	0.91	0.52	0.77	0.78	1.51	1.6	1.06	1.22	0.3	0.51	0.74	0.38	0.315	0.24	0.39	0.22	0.19	0.14	0.33	1.03
54989	hSQ041820	|| ZNF770 || Zinc finger protein 770 || Hs.5327 || NM_014106 || || 54989 || hHR018381 || 1411300	-1.45	-1.35	-1.26	-1.63	-1.29	-1.57	-1.36	-1.35	-0.43	-0.38	-1.4	-0.96	-0.52	-1.34	-0.745	-0.9	-0.92	-0.96	-0.05	-0.46	-1.24	0.08
442344	hSQ016837	|| || similar to ribosomal protein L27 || || || || || hHR029106 || 1411404	-0.71	-0.68	-0.39	-0.93	-0.45	-0.01	1.39	1.14	0.96	1.16	0.63	2.98e-09	0.05	1.48	0.695	0.48	0.16	-0.16	0.08	0.18	-0.43	-0.19
26012	hSQ028408	|| NELF || Nasal embryonic LHRH factor || Hs.455336 || NM_015537 || || 26012 || hHR030993 || 1411424	0.01	-0.05	0.39	0.14	0.39	0.31	0.15	0.25	-0.12	-0.57	0.03	-0.55	-0.22	-0.63	0.915	1.01	0.75	-0.51	-0.42	-0.99	0.82	0.78
441468	hSQ004411	|| || || || XM_499165 || || || hHR017630 || 1411430	-0.81	-0.81	-0.32	-0.31	-0.21	-0.21	-1.04	-1.3	-0.96	-2	-0.04	-0.41	-0.67	-1	-0.035	0.14	-0.28	-0.12	-0.63	-0.43	0.9	-0.28
6389	hSQ043431	|| SDHA || Succinate dehydrogenase complex, subunit A, flavoprotein (Fp) || Hs.440475 || NM_004168 || || 6389 || hCM000908 || 1411447	0.18	0.17	-0.33	-0.41	-0.82	-0.45	0.48	0.59	-8.94e-10	0.15	-0.03	-0.64	0.39	-0.39	-0.865	-0.69	-0.6	-0.48	0.67	0.48	0.09	0.43
387805	hSQ008299	|| || || || XM_370649 || || || hHR029756 || 1411550	-0.93	-0.77	-0.28	-1	-0.17	-0.4	1.2	1.08	0.65	0.82	0.15	-0.26	0.88	0.01	-0.645	-0.58	-1.28	-2.18	0.07	-0.01	-2.12	0.93
9521	hSQ013859	|| EEF1E1 || Eukaryotic translation elongation factor 1 epsilon 1 || Hs.631818 || NM_004280 || || 9521 || hHR014475 || 1411608	-1.07	-0.95	-1.3	-1.02	-0.34	-0.09	-0.09	-0.05	-0.03	0.55	-0.41	0.24	-1.07	0.96	-0.465	-0.51	-0.46	-0.2	-0.34	0.28	-0.31	-0.8
8895	hSQ037595	|| CPNE3 || Copine III || Hs.191219 || NM_003909 || || 8895 || hHR006559 || 1411622	0.3	0.35	-0.35	-0.59	0.17	0.31	0.14	0.34	0.35	0.48	-9.54e-09	0.27	0.34	0.7	-0.075	0	-0.13	0.2	-0.37	-0.36	-0.08	-0.42
7398	hSQ028366	|| USP1 || Ubiquitin specific peptidase 1 || Hs.35086 || NM_003368 || || 7398 || hHR001846 || 1411686	0.39	0.64	-0.24	-0.36	0.25	0.49	0.43	0.5	0.17	0.29	-0.21	0.15	0.38	1.07	0.375	0.17	0.47	0.57	0.99	0.41	0.41	0.81
51428	hSQ010847	|| DDX41 || DEAD (Asp-Glu-Ala-Asp) box polypeptide 41 || Hs.484288 || NM_016222 || || 51428 || hHR029843 || 1411735	1.46	1.41	1.19	1.09	1.19	1.21	1.24	1.65	0.37	0.66	0.81	0.1	0.39	-0.17	-0.675	-0.75	-1.18	-1.42	-1.25	-0.79	-0.03	0.11
51616	hSQ034688	|| TAF9B || TAF9B RNA polymerase II, TATA box binding protein (TBP)-associated factor, 31kDa || Hs.592248 || NM_015975 || || 51616 || hHR030663 || 1411751	-0.04	0.13	-0.26	-0.32	0.09	0.08	1.03	0.78	0.66	0.69	0.36	0.78	0.05	0.46	-0.245	-0.3	0.29	-0.25	0.17	0.04	-0.57	0.19
339047	hSQ001539	|| LOC339047 || Hypothetical protein LOC339047 || Hs.648395 || AK124516 || || 339047 || hHR031857 || 1411759	-1.16	-1.32	-1.47	-1.81	-2.09	-2.12	-0.88	-0.58	-1.59	-1.76	-1.73	-2.52	-1.22	-3.14	-0.105	0.25	5.96e-10	-0.87	0.39	0.05	0.28	1.45
400948	hSQ007774	|| || || || XM_376043 || || || hHR019317 || 1411792	-0.48	-0.46	0.48	0.2	-0.19	0.23	1.4	1.12	1.72	1.53	1.19	0.16	0.57	1.48	1.835	1.46	0.64	0.31	-0.32	-0.32	0.54	1.11
5130	hSQ016413	|| PCYT1A || Phosphate cytidylyltransferase 1, choline, alpha || Hs.435767 || NM_005017 || || 5130 || hHR010218 || 1411826	1.2	1.06	0.55	0.44	1	0.76	1.05	1.17	0.28	0.47	1.12	0.51	0.55	-0.01	-0.165	0.04	0.06	-0.13	0.53	0.36	0.06	1.55
57189	hSQ018565	|| KIAA1147 || KIAA1147 || Hs.521240 || AB032973 || || 57189 || hHR006880 || 1411843	-1.65	-1.63	-1.17	-1.95	-1.25	-1.79	-2.08	-1.97	-1.77	-1.58	-2.23	-1.39	-1.31	-2.19	-1.655	-1.88	-1.48	-0.93	-0.51	-0.63	-0.99	-0.88
567	hSQ002557	|| B2M || Beta-2-microglobulin || Hs.693631 || NM_004048 || || 567 || hCM001115 || 1411896	-1.32	-1.28	-1.28	-0.98	-0.59	-0.45	0.17	-0.06	0.8	0.97	0.27	-0.06	-0.47	1.43	-0.025	0.17	0.55	0.04	0.16	0.95	0.21	0.1
373156	hSQ029482	|| GSTK1 || Glutathione S-transferase kappa 1 || Hs.390667 || NM_015917 || || 373156 || hHR012693 || 1411935	0.77	0.6	0.65	0.3	0.23	0.14	1.78	1.72	1.64	1.61	1.83	0.43	0.63	0.95	1.105	0.9	0.94	0.32	0.26	0.33	0.73	0.8
286334	hSQ022164	|| ZNF618 || Zinc finger protein 618 || Hs.349208 || AJ420454 || || 114991 || hHR005931 || 1411942	-0.02	-0.05	-0.93	-0.7	-0.37	-0.1	-1.06	-1.09	-2.4	-1.91	-3.07	-1.26	-1.23	-4.61	-1.045	-0.98	-0.94	-0.63	-0.64	-0.74	-1.1	-1.7
10921	hSQ018039	|| RNPS1 || RNA binding protein S1, serine-rich domain || Hs.355643 || NM_006711 || || 10921 || hHR030040 || 1411959	0.87	0.73	1.2	0.65	0.83	0.77	1.23	1.44	1.21	1.6	0.86	0.37	0.87	0.21	0.765	0.87	0.42	0.24	0.3	0.39	1.06	2.14
96459	hSQ045466	|| FNIP1 || Folliculin interacting protein 1 || Hs.591273 || AL832008 || || 96459 || hHR004755 || 1411992	-0.41	-0.3	-1.04	-0.6	0.15	0.1	-0.29	-0.69	-0.68	-0.41	-1.12	2.98e-09	-0.74	0.07	1.645	1.34	1.17	1.59	1.06	1.27	1.74	0.4
55527	hSQ029984	|| FEM1A || Fem-1 homolog a (C. elegans) || Hs.515082 || NM_018708 || || 55527 || hHR029060 || 1412145	0.37	0.42	0.11	-0.16	-0.08	-0.4	-0.05	0.02	-0.28	-0.7	-0.2	-0.4	0.25	-0.98	0.965	1.04	0.69	0.13	0.77	0.24	0.98	0.83
1903	hSQ031490	|| EDG3 || Endothelial differentiation, sphingolipid G-protein-coupled receptor, 3 || Hs.585118 || NM_005226 || || 1903 || hHR006282 || 1412160	-0.61	-0.71	-0.74	-0.73	-0.34	-0.44	-0.74	-0.46	-0.12	-0.08	-0.59	-0.19	0.08	-0.26	-0.095	0.05	-0.07	-0.04	0.07	-0.35	-0.62	-0.11
54083	hSQ039429	|| C21orf30 || Chromosome 21 open reading frame 30 || Hs.222909 || AL117578 || || 54083 || hHR021898 || 1412213	0.16	0.31	0.13	-0.44	-0.11	0.39	0.69	1.11	-0.25	-0.43	-9.54e-09	-1.05	0.15	-1.51	-0.335	-0.55	-1.97	-1.65	-1.44	-1.18	-0.43	-2.95
53635	hSQ026746	|| PTOV1 || Prostate tumor overexpressed gene 1 || Hs.587979 || NM_017432 || || 53635 || hHR027377 || 1412351	0.44	0.22	0.46	0.32	0.26	1.38	-0.71	-1.43	-1.78	-3.71	2.13	-0.24	-0.17	1.23	0.885	1.49	1.73	0.36	-0.27	0.3	1.96	1.21
4802	hSQ005100	|| NFYC || Nuclear transcription factor Y, gamma || Hs.233458 || NM_014223 || || 4802 || hHR026736 || 1412377	1.77	1.82	1.55	1.17	1.05	1.25	1.93	2.15	1.58	1.66	1.17	0.12	1.06	0.18	1.515	1.37	1.51	1.19	0.69	0.71	1.51	1.92
119710	hSQ045463	|| C11orf74 || Chromosome 11 open reading frame 74 || Hs.406726 || NM_138787 || || 119710 || hHR022134 || 1412400	0.12	0.33	0.1	-0.32	0.67	0.66	2.54	2.5	1.55	1.45	1.09	0.92	1.28	1.16	-0.585	-0.32	-1.38	-1.18	-0.41	-0.44	-1.25	-0.1
57570	hSQ035793	|| TRMT5 || TRM5 tRNA methyltransferase 5 homolog (S. cerevisiae) || Hs.380159 || NM_020810 || || 57570 || hHR028771 || 1412450	-0.47	-0.22	0.26	-0.42	-0.15	0.37	0.44	0.15	-0.61	-0.21	-1.04	-0.57	0.64	0.61	-1.625	-1.46	-2.3	-2.18	-0.87	-1.06	-1.84	-0.44
220686	hSQ022463	|| || || || AK126860 || || || hHR031787 || 1412481	1.7	1.47	0.36	-0.19	0.44	0.73	0.35	0.45	-0.44	-0.52	0.6	-0.84	-0.86	-0.05	-0.155	-0.5	-1.24	-1.23	-1.51	-2.21	0.19	-2.19
128240	hSQ030670	|| APOA1BP || Apolipoprotein A-I binding protein || Hs.528320 || NM_144772 || || 128240 || hHR019223 || 1412513	-1.17	-1.31	-0.79	-1.15	-0.77	-0.67	0.92	0.85	0.65	0.53	0.4	-0.32	0.33	0.72	0.955	0.58	0.36	-0.32	0.28	-0.03	0.66	0.39
126917	hSQ021067	|| LOC126917 || Hypothetical protein LOC126917 || Hs.466625 || AK024480 || || 126917 || hHR031245 || 1412573	-1.44	-1.36	-0.92	-1.23	-0.75	-1.25	-1.2	-0.83	-2.21	-2.74	-3.65	-2.36	-0.85	-2.83	-0.215	-0.31	-0.89	-1.8	-0.25	-1.49	-0.49	-1.33
144581	hSQ045075	|| || || || XM_056681 || || || hHR029384 || 1412577	-0.36	0.11	0.21	-0.76	0.64	0.84	1.2	0.93	-0.41	0.27	-0.54	0.2	0.65	1.41	-1.505	-1.14	-2.3	-1.96	-0.16	-0.28	-2.58	-0.57
10036	hSQ033786	|| CHAF1A || Chromatin assembly factor 1, subunit A (p150) || Hs.79018 || NM_005483 || || 10036 || hHR018234 || 1412606	-0.28	-0.24	-0.47	-0.57	-0.3	-0.91	-1.12	-0.87	-1.88	-1.69	-1.47	-1.85	-0.56	-2.07	-0.715	-0.95	-1.61	-2.54	-0.52	-1.03	-0.99	-0.44
4678	hSQ022858	|| NASP || Nuclear autoantigenic sperm protein (histone-binding) || Hs.319334 || NM_172164 || || 4678 || hHR028846 || 1412630	-1.26	-1.12	-0.59	-0.91	-0.76	-1.04	-1.26	-1.04	-1.2	-1.05	-1.91	-1.66	-0.41	-2.06	-2.675	-2.19	-4.37	-2.36	-1.32	-1.87	-1.7	-0.9
145758	hSQ021258	|| LOC145758 || Hypothetical protein LOC145758 || Hs.595752 || AK057921 || || 145758 || hHR009324 || 1412633	-0.51	-0.44	-0.6	-0.51	-0.58	-0.56	-0.41	-0.25	0.08	-0.09	-0.59	-0.33	-0.02	-0.33	1.005	0.69	1.02	1.41	1.15	0.73	1.09	0.62
2923	hSQ010555	|| PDIA3 || Protein disulfide isomerase family A, member 3 || Hs.591095 || NM_005313 || || 2923 || hHR029985 || 1412670	-0.35	-0.31	-1.11	-1.95	-0.72	-0.66	-0.22	-0.81	-1.52	-1.8	-1.7	-1.42	0.26	-0.95	-3.095	-2.66	-3.58	-3.43	-1.13	-1.1	-2.7	-1.09
441836	hSQ010170	|| || || || XM_497605 || || || hHR021384 || 1412691	1.25	1.38	1.57	1.33	1.49	1.58	-0.35	-0.77	-0.45	-2.03	0.96	-0.16	-1.34e-09	0.15	-0.175	0.01	0.06	-0.09	0.08	0.63	0.33	3.22
4709	hSQ041821	|| NDUFB3 || NADH dehydrogenase (ubiquinone) 1 beta subcomplex, 3, 12kDa || Hs.109760 || NM_002491 || || 4709 || hHR019544 || 1412727	-0.76	-0.7	-0.19	-0.19	0.21	0.24	0.85	1.06	1.73	1.47	0.93	0.18	0.37	1.54	-0.215	0.07	-1.38	-1.07	-0.63	-0.26	-0.66	-0.12
158104	hSQ034755	|| || || || XM_016113 || || || hHR029470 || 1412757	-0.48	-0.42	0.16	-0.31	0.04	0.09	1.35	1.39	1.26	1.33	0.82	-0.07	0.22	1.01	0.125	0.25	-0.66	-1.44	-0.55	-0.16	-0.1	1.07
379025	hSQ011440	|| FLJ31306 || Hypothetical protein FLJ31306 || Hs.531089 || BC034618 || || 379025 || hHR007152 || 1412782	-2.63	-2.43	-1.61	-1.8	-2.15	-1.9	-1.84	-1.96	-1.54	-1.68	-2.84	-1.74	-1.74	-2.92	-1.705	-1.76	-2.88	-1.33	-1.62	-1.88	-2.04	-2.6
285329	hSQ044090	|| || || || XM_209569 || || || hHR031542 || 1412819	1.15	1.09	1.13	0.62	0.83	0.8	0.78	1.04	0.62	0.41	0.55	0.14	1.03	0.44	-0.195	-0.13	-1.16	-0.89	-0.35	-0.21	-0.06	0.76
4627	hSQ002956	|| MYH9 || Myosin, heavy chain 9, non-muscle || Hs.474751 || NM_002473 || || 4627 || hHR022934 || 1412826	1.88	1.52	0.21	0.18	0.72	0.22	0.49	0.9	-0.82	-0.78	-1.18	-0.9	-0.53	-1.53	0.145	0.13	-1.09	-1.2	-0.48	-1.04	-0.32	-0.46
9016	hSQ031204	|| SLC25A14 || Solute carrier family 25 (mitochondrial carrier, brain), member 14 || Hs.194686 || NM_003951 || || 9016 || hHR026490 || 1412846	-0.74	-0.65	-0.08	-0.29	0.3	-0.47	-0.09	0.17	0.22	0.42	-0.22	-0.15	-0.05	-0.33	0.485	-0.16	-0.28	-0.44	0.21	0.22	-0.32	0.75
114783	hSQ030984	|| LMTK3 || Lemur tyrosine kinase 3 || Hs.207426 || AB067470 || || 114783 || hHR016307 || 1412891	3.08	3.27	1.84	1.73	1.22	2.72	2.52	2.08	1.35	1.41	1.88	0.83	2.32	0.66	2.145	1.92	2.05	1.23	2.04	1.27	1.97	1.93
57291	hSQ028597	|| KIAA0114 || KIAA0114 || Hs.656255 || BC045566 || || 57291 || hHR004996 || 1412921	-0.2	-0.39	-0.31	-0.53	-0.05	-0.05	0.72	0.61	1.45	1.54	1	0.13	0.4	0.69	1.235	1.14	0.96	0.29	-0.12	0.39	0.16	0.5
60558	hSQ042815	|| GUF1 || GUF1 GTPase homolog (S. cerevisiae) || Hs.546419 || NM_021927 || || 60558 || hHR008796 || 1412975	-1.45	-1.35	-1.31	-1.25	-0.77	-0.96	-0.86	-0.7	0.02	-0.26	-1.29	-0.3	-0.38	-0.08	0.025	0.04	0.67	0.6	0.59	0.47	0.08	0.84
202227	hSQ010050	|| || || || XM_116396 || || || hHR027990 || 1412985	-0.6	-0.77	0.12	-0.28	-0.41	-0.46	1.25	1.11	1.36	1.48	1.13	0.5	0.09	0.68	1.145	1.04	0.97	0.56	0.46	0.69	1.09	1.9
440350	hSQ008266	|| || similar to nuclear pore complex interacting protein || || || || || hHR031619 || 1412996	2.94	2.75	-0.01	-0.58	0.05	0.18	-1.09	-1	-1.75	-1.76	-0.77	-1.32	-0.67	-1.54	-0.245	-0.24	-0.64	-0.85	0.17	-0.23	-0.35	0.2
65998	hSQ041761	|| MGC3032 || Hypothetical protein MGC3032 || Hs.568945 || AK096306 || || 65998 || hHR025054 || 1413063	-0.61	-0.35	-0.63	-0.96	-0.33	-0.56	-0.7	-0.48	-1.25	-1.33	-1.09	-0.91	-0.32	-1.39	0.885	0.43	0.77	-0.15	0.45	-0.17	0.26	1.3
79085	hSQ037288	|| SLC25A23 || Solute carrier family 25 (mitochondrial carrier; phosphate carrier), member 23 || Hs.356231 || NM_024103 || || 79085 || hHR014421 || 1413066	-0.59	-0.65	-0.19	-0.34	-0.5	-0.75	0.62	0.42	0.57	0.72	0.27	-0.48	0.1	-0.01	0.085	0.25	-0.58	-0.35	-0.13	-0.86	0.28	0.45
54819	hSQ035309	|| ZCCHC10 || Zinc finger, CCHC domain containing 10 || Hs.29700 || NM_017665 || || 54819 || hHR023603 || 1413082	-1.37	-1.06	-1.13	-1.3	-0.73	-0.39	0.97	0.83	0.18	0.57	-0.23	-0.1	-0.33	0.26	0.625	0.34	0.35	-0.02	0.69	0.42	-0.06	0.98
284252	hSQ036336	|| KCTD1 || Potassium channel tetramerisation domain containing 1 || Hs.526630 || NM_198991 || || 284252 || hHR027416 || 1413084	0.63	0.76	0.02	0.06	0.21	0.17	-0.21	-0.17	-0.41	-0.96	-0.46	-0.28	-0.51	-1.01	-0.815	-0.25	-0.15	-0.16	0.62	0.04	-0.59	0.01
64777	hSQ045134	|| RMND5B || Required for meiotic nuclear division 5 homolog B (S. cerevisiae) || Hs.519804 || NM_022762 || || 64777 || hHR016521 || 1413110	-0.05	-0.07	0.37	-0.17	-0.1	-0.23	0.83	0.68	0.78	0.9	0.57	-0.57	0.37	0.18	1.145	1.02	0.8	0.82	0.64	0.44	1.44	1.79
152559	hSQ042008	|| || || || NM_177453 || || || hHR001860 || 1413168	-1.12	-0.9	-0.9	-1.1	-0.19	-0.55	-1.22	-1.34	-0.11	-0.05	-1.11	-0.6	-0.55	0.55	0.285	0.3	0.03	0.2	0.79	0.39	0.11	0.51
3301	hSQ004419	|| DNAJA1 || DnaJ (Hsp40) homolog, subfamily A, member 1 || Hs.445203 || NM_001539 || || 3301 || hHR026984 || 1413180	-0.82	-0.92	-1.3	-0.61	-0.73	-0.85	-2.51	-2.94	-2.71	-4.08	-0.45	-0.77	-0.38	-3.32	-1.795	-1.48	-0.96	-1.62	-0.42	0.51	-1.82	-1.71
7334	hSQ032622	|| UBE2N || Ubiquitin-conjugating enzyme E2N (UBC13 homolog, yeast) || Hs.524630 || NM_003348 || || 7334 || hHR007655 || 1413193	-0.37	-0.41	0.01	-0.09	0.45	0.37	0.79	0.78	1.3	1.36	0.38	0.27	0.22	0.77	1.205	0.95	1.34	0.6	0.33	0.36	1.17	1.19
440151	hSQ034638	|| || || || XM_498568 || || || hHR012350 || 1413195	-0.62	-0.65	-0.5	-0.7	-0.27	-0.88	0.45	0.26	-0.09	0.01	-0.04	-0.69	0.13	-0.5	0.095	0.19	0.42	-0.03	0.35	0.08	0.24	0.82
2280	hSQ015475	|| FKBP1A || FK506 binding protein 1A, 12kDa || Hs.471933 || NM_000801 || || 2280 || hHR028164 || 1413220	-0.47	-0.43	0.39	-0.11	-0.11	-0.16	0.3	0.55	0.7	1.04	-0.51	-0.5	0.36	-0.37	1.565	1.54	0.9	0.38	0.24	0.07	0.61	2.45
1841	hSQ037073	|| DTYMK || Deoxythymidylate kinase (thymidylate kinase) || Hs.471873 || NM_012145 || || 1841 || hHR030654 || 1413223	-0.65	-0.54	0.07	-0.24	0.19	0.35	0.8	0.77	0.97	0.67	0.79	-0.34	0.15	1.07	0.455	0.62	-0.27	-0.56	-0.03	-0.12	0.11	0.02
8227	hSQ007180	|| CXYorf3 || Chromosome X and Y open reading frame 3 || Hs.522572 || NM_005088 || || 8227 || hHR031295 || 1413320	-0.15	0.13	-0.06	-0.11	-0.32	0.13	-0.48	-0.25	-1.65	-1.48	-2.01	-1.55	-0.28	-2.01	0.265	-0.02	0.26	-0.8	0.7	-0.31	0.05	-0.4
5530	hSQ002649	|| PPP3CA || Protein phosphatase 3 (formerly 2B), catalytic subunit, alpha isoform || Hs.435512 || NM_000944 || || 5530 || hHR005684 || 1413371	-0.73	-0.63	-0.95	-1.22	-0.92	-0.82	-0.6	-0.56	-0.37	-0.42	-0.76	-0.34	-0.38	0.43	0.375	0.27	0.22	0.59	0.74	0.24	-0.11	0.04
444	hSQ006945	|| ASPH || Aspartate beta-hydroxylase || Hs.622998 || NM_032468 || || 444 || hHR004283 || 1413387	-1.1	-0.8	-0.02	-0.93	-0.29	-0.27	0.37	0.09	-0.7	-0.14	-1.69	-0.71	-0.08	-0.23	-1.735	-1.77	-2.09	-1.97	-0.51	-0.96	-2.09	0.22
3340	hSQ000750	|| NDST1 || N-deacetylase/N-sulfotransferase (heparan glucosaminyl) 1 || Hs.222055 || NM_001543 || || 3340 || hHR009420 || 1413389	-1.91	-1.79	-2.19	-3.12	-1.89	-2.51	-3.07	-3	-3	-3.17	-2.51	-2.63	-1.61	-3.66	-2.135	-2.23	-2.84	-2.97	-1.64	-2.64	-1.49	-3.75
1973	hSQ011824	|| EIF4A1 || Eukaryotic translation initiation factor 4A, isoform 1 || Hs.129673 || NM_001416 || || 1973 || hHR030756 || 1413413	-0.26	-0.21	0.08	-0.57	-0.4	-0.41	1.11	1.16	0.73	0.74	0.51	-0.55	0.85	-0.33	-0.545	-0.47	-0.98	-1.36	-0.48	-0.25	-1.1	0.39
55127	hSQ028715	|| LGALS8 || Lectin, galactoside-binding, soluble, 8 (galectin 8) || Hs.652333 || BC065205 || || 3964 || hHR009514 || 1413426	0.29	0.27	-0.55	-0.65	-0.44	-0.48	-1.58	-0.84	-0.62	-0.85	-1.27	-0.44	-0.06	-1.18	-0.215	-0.51	-0.5	-0.16	0.1	-0.44	-0.18	-1.24
1054	hSQ023001	|| CEBPG || CCAAT/enhancer binding protein (C/EBP), gamma || Hs.429666 || NM_001806 || || 1054 || hHR004768 || 1413467	-1	-1.01	-0.6	-0.71	-0.93	-1.24	-0.96	-0.84	-0.31	-0.12	-1.4	-0.63	-0.35	-0.78	-0.565	-0.59	-0.66	-0.11	0.42	0.46	-0.18	0.9
51228	hSQ036664	|| GLTP || Glycolipid transfer protein || Hs.381256 || NM_016433 || || 51228 || hHR029507 || 1413519	0.1	-0.04	0.36	-0.01	-0.05	0.55	-1.29	-1.56	-1.25	-2.29	-0.21	-0.67	-0.38	-0.67	-1.145	-0.75	-0.36	-0.07	-0.42	0.25	0.17	0.48
440595	hSQ014908	|| || || || XM_496374 || || || hHR029592 || 1413551	-0.65	-0.25	0.7	-0.81	0.01	0.23	0.04	-0.04	0.12	0.64	-0.49	-0.07	0.42	1.24	-0.495	-0.51	-0.79	-0.66	0.15	0.15	-1.9	0.62
4267	hSQ003289	|| CD99 || CD99 molecule || Hs.654354 || NM_002414 || || 4267 || hHR030944 || 1413635	-0.39	-0.28	0.33	-0.27	-0.03	0.08	1	0.71	0.83	0.93	-0.42	-0.77	0.45	-0.02	-0.785	-0.33	-1.28	-1.65	-0.96	-0.94	-1.71	0.37
10632	hSQ039078	|| ATP5L || ATP synthase, H+ transporting, mitochondrial F0 complex, subunit G || Hs.486360 || NM_006476 || || 10632 || hHR005104 || 1413677	-1.41	-1.41	-1.17	-1.75	-1.29	-1.64	0.03	-0.12	0.29	0.37	-0.27	-0.39	-0.29	0.36	-0.215	-0.2	-0.37	-0.61	0.07	0.01	-0.84	-0.43
84333	hSQ029388	|| PCGF5 || Polycomb group ring finger 5 || Hs.500512 || NM_032373 || || 84333 || hHR001604 || 1413688	0.12	0.31	-0.81	-0.43	-0.06	-0.18	0.88	0.83	0.84	0.72	-0.22	0.61	0.2	1.03	0.415	0.57	0.85	0.37	0.48	0.41	0.23	0.37
55450	hSQ022088	|| CAMK2N1 || Calcium/calmodulin-dependent protein kinase II inhibitor 1 || Hs.197922 || NM_018584 || || 55450 || hHR003694 || 1413700	-0.25	-0.26	0.3	-0.47	-0.04	-0.06	0.58	0.19	0.46	0.48	0.02	-0.61	-1.34e-09	-0.34	0.975	0.93	0.99	0.26	-0.21	-0.48	0.54	0.95
10301	hSQ022148	|| || || || NM_005887 || || || hHR008912 || 1413734	-0.66	-0.74	0.24	0.15	0.34	0.31	0.35	0.74	1.09	1.09	0.52	0.45	0.63	0.86	0.375	0.14	-0.32	-0.71	-0.63	-0.32	-0.53	0.13
80097	hSQ038706	|| FAM128B || Family with sequence similarity 128, member B || Hs.469925 || NM_025029 || || 80097 || hHR029134 || 1413802	-0.02	-0.06	0.11	-0.41	-0.28	-0.08	1.48	1.55	1.47	1.32	1.44	-0.51	0.62	1.01	0.825	0.83	0.21	-0.79	-0.06	-0.33	0.93	0.78
4144	hSQ038424	|| MAT2A || Methionine adenosyltransferase II, alpha || Hs.516157 || NM_005911 || || 4144 || hHR030513 || 1413903	-0.24	0.13	0.67	0.1	0.65	0.89	-0.3	-0.41	-0.45	0.05	-0.79	-0.53	0.3	0.31	-0.175	0.29	-0.06	-0.04	0.33	0.73	-0.07	0.62
8826	hSQ008543	|| IQGAP1 || IQ motif containing GTPase activating protein 1 || Hs.430551 || NM_003870 || || 8826 || hHR004065 || 1413925	1.18	1.41	0.14	-0.05	0.53	0.7	0.81	0.81	0.1	0.22	-0.01	0.29	0.13	0.77	0.115	-0.12	-0.67	-0.27	0.2	-0.15	-0.42	-0.4
6235	hSQ010035	|| RPS29 || Ribosomal protein S29 || Hs.156367 || NM_001032 || || 6235 || hHR028115 || 1413942	-1.74	-1.58	0.01	-0.44	-0.3	0.07	0.54	0.7	1.12	1.06	0.09	-0.32	-0.67	0.79	1.025	0.97	0.48	-0.24	-0.06	0.25	0.53	1.2
286451	hSQ008711	|| YIPF6 || Yip1 domain family, member 6 || Hs.655430 || NM_173834 || || 286451 || hHR004234 || 1413965	-0.95	-0.82	-0.67	-0.83	-0.31	-0.54	-0.89	-0.84	-0.59	-0.36	-0.8	-0.3	-0.65	-0.5	-0.075	-0.11	0.33	0.64	0.12	0.28	0.1	-1.28
6319	hSQ038616	|| SCD || Stearoyl-CoA desaturase (delta-9-desaturase) || Hs.558396 || NM_005063 || || 6319 || hHR027624 || 1414033	-1.19	-0.88	-0.51	-0.81	-0.56	-0.59	-1.1	-1.33	-1.16	-0.7	-1.5	-1.07	-0.08	-1.01	-1.775	-1.82	-2.18	-1.94	-1.1	-1.15	-2.53	-1.28
90410	hSQ000134	|| IFT20 || Intraflagellar transport 20 homolog (Chlamydomonas) || Hs.655045 || NM_174887 || || 90410 || hHR010348 || 1414059	-0.96	-1.03	-0.95	-0.98	-1.11	-1.43	0.36	0.47	0.28	0.83	-0.38	-0.45	-0.26	-0.35	-0.675	-0.79	-0.68	-0.9	-0.12	0.22	-0.83	1.07
89890	hSQ044345	|| KBTBD6 || Kelch repeat and BTB (POZ) domain containing 6 || Hs.534040 || NM_152903 || || 89890 || hHR006963 || 1414066	-0.8	-0.59	-1.45	-1.34	-0.64	-0.8	-0.82	-0.82	-0.34	-0.47	-0.96	-0.18	-0.53	-0.24	0.045	-0.16	0.63	0.7	0.46	0.54	0.29	-0.27
390876	hSQ004697	|| || || || XM_372704 || || || hHR027021 || 1414087	0.17	0.46	0.21	-0.37	0.49	0.62	2.44	2.09	1.01	1.13	0.79	2.98e-09	0.45	1.25	-0.355	-0.33	-1.91	-2.14	-0.49	-1.12	-1.37	-0.99
10413	hSQ024774	|| YAP1 || Yes-associated protein 1, 65kDa || Hs.503692 || NM_006106 || || 10413 || hHR026391 || 1414143	-1.19	-1.21	-1.36	-1.01	-1.22	-1.54	-2.83	-3.05	-2	-2.52	-1.59	-0.98	-1.01	-1.54	-1.965	-2.19	-1.65	-1.11	-0.59	-0.23	-0.88	-1.18
400764	hSQ015957	|| || || || XM_378880 || || || hHR012722 || 1414160	2.14	2.36	1.77	1.67	1.92	1.77	2.56	2.49	2.7	2.88	2.64	2.14	2.34	1.61	0.615	0.61	1.16	0.83	0.09	0.32	-0.07	1.1
5471	hSQ018885	|| PPAT || Phosphoribosyl pyrophosphate amidotransferase || Hs.331420 || NM_002703 || || 5471 || hHR027725 || 1414205	-1.11	-0.95	-0.95	-0.97	-0.54	-0.43	-1.01	-0.77	-0.12	0.22	-0.75	-0.1	-0.32	0.26	0.065	0.04	-0.32	-6.71e-10	0.32	0.4	-3.58e-09	0.38
9470	hSQ013910	|| EIF4E2 || Eukaryotic translation initiation factor 4E family member 2 || Hs.292026 || NM_004846 || || 9470 || hHR027818 || 1414241	0.59	0.66	0.44	0.08	0.79	0.55	1.44	1.49	0.22	0.45	0.54	0.26	0.93	0.21	-1.065	-1.22	-1.61	-1.16	-0.66	-0.25	-0.76	-0.09
3933	hSQ004301	|| LCN1 || Lipocalin 1 (tear prealbumin) || Hs.530311 || NM_002297 || || 3933 || hHR020388 || 1414259	6.67	6.38	4.89	4.06	4.88	4.9	2.28	2.15	1.8	1.35	4.7	4.41	2.02	1.78	1.445	1.36	1.81	1.63	0.27	0.46	1.77	0.76
5201	hSQ001952	|| PFDN1 || Prefoldin subunit 1 || Hs.483564 || NM_002622 || || 5201 || hHR022941 || 1414307	-0.09	-0.11	0.52	0.09	0.28	-0.52	-1.2	-2.18	-1.11	-2.32	-0.17	0.03	-0.54	-0.36	-0.705	-0.33	-0.22	-0.7	-0.23	0.16	-0.31	0.36
54958	hSQ002810	|| TMEM160 || Transmembrane protein 160 || Hs.105606 || NM_017854 || || 54958 || hHR024681 || 1414311	-0.18	-0.15	0.23	0.27	0.2	0.62	-2.56	-2.82	-3.1	-3.48	2.17	-0.04	0.1	1.11	2.255	1.95	1.94	0.98	0.18	0.59	1.55	0.56
286140	hSQ008348	|| || || || XM_209913 || || || hHR026573 || 1414352	0.06	-0.14	-0.46	0.18	0.43	0.62	-1.43	-1.72	-1.09	-4.36	0.3	-0.64	-0.5	1.27	-0.215	-0.24	-0.84	-2	-1.23	-0.11	0.7	-0.33
349338	hSQ029429	|| FAM39B || Family with sequence similarity 39, member B || Hs.653231 || NM_182905 || || 375260 || hHR029081 || 1414353	-0.56	-0.86	-0.6	-1.05	-0.99	-1.39	-0.52	-0.49	-1.15	-2.19	0.08	-1.49	-0.87	-1.26	-0.605	-0.04	-0.77	-2.08	-0.55	-0.76	0.47	0.26
285812	hSQ016577	|| LOC285812 || Hypothetical protein LOC285812 || Hs.593631 || AL831898 || || 285812 || hHR022030 || 1414429	-1.99	-1.9	-1.84	-1.91	-1.47	-1.87	-2.64	-2.11	-2.73	-3.27	-3.31	-2.16	-1.67	-3.33	-0.485	-0.79	-0.75	-0.96	-0.98	-1.43	-0.69	-2.45
6185	hSQ013022	|| RPN2 || Ribophorin II || Hs.370895 || NM_002951 || || 6185 || hCT000578 || 1414484	1.13	1.06	-0.23	-0.7	-0.22	-0.39	1.33	1.67	0.82	1.01	0.44	0.21	0.69	0.56	1.395	1.16	1.37	0.76	0.75	1.01	0.87	-0.33
7171	hSQ025906	|| TPM4 || Tropomyosin 4 || Hs.631618 || NM_003290 || || 7171 || hHR029738 || 1414488	1.19	0.67	1.25	0.95	1.06	1.37	0.32	0.58	0.19	0.76	0.02	0.32	0.58	0.23	-0.275	-0.18	-0.63	0.25	-0.28	0.41	-3.58e-09	2.71
125950	hSQ004021	|| MGC19604 || Similar to RIKEN cDNA B230118G17 gene || Hs.654865 || NM_133452 || || 112812 || hHR018948 || 1414513	2.63	2.54	1.78	1.11	1.87	1.81	1.86	1.92	1.7	1.86	2.02	0.71	1.63	0.07	1.805	1.65	1.21	0.75	0.54	0.15	1.24	2.27
22992	hSQ038020	|| FBXL11 || F-box and leucine-rich repeat protein 11 || Hs.124147 || NM_012308 || || 22992 || hHR020962 || 1414522	1.44	1.46	0.42	0.41	0.72	0.76	0.38	0.25	-0.18	-0.73	-0.3	-0.25	0.4	-0.85	1.365	1.18	1.45	1.01	1.03	0.61	1.05	0.73
10571	hSQ004068	|| || || || NM_006780 || || || hHR029171 || 1414546	-0.66	-0.74	-0.48	-0.67	-0.98	-0.75	-0.79	-1.49	-1.39	-1.38	-0.83	-1.66	-0.98	-1.66	-0.595	-0.69	-0.41	-1.12	-0.52	-0.15	0.08	-0.4
284565	hSQ000160	|| NBPF15 || Neuroblastoma breakpoint family, member 15 || Hs.655246 || NM_173638 || || 284565 || hHR031060 || 1414561	-0.51	-0.41	-0.86	-1.02	-0.76	-0.43	-1.16	-0.75	-0.97	-0.84	-1.46	-1.81	-0.66	-1.27	0.225	0.09	0.06	-0.23	0.13	-0.1	0.19	0.17
389217	hSQ041471	|| || || || XM_371701 || || || hHR026090 || 1414635	-0.47	-0.56	-1.44	-1.39	-0.32	-1.1	-4.05	-4.28	-5.05	-5.57	-1.82	-1.58	-1.47	-2.24	-3.885	-3.57	-3.87	-3.05	-2.14	-0.93	-2.14	-2.65
23637	hSQ023796	|| RABGAP1 || RAB GTPase activating protein 1 || Hs.271341 || NM_012197 || || 23637 || hHR009009 || 1414641	0.11	0.21	0.54	0.43	0.3	0.52	-0.84	-0.55	-1.57	-1.98	-1.39	-0.59	-0.28	-1.74	0.015	-0.39	-0.25	-0.11	0.33	0.34	-0.05	0.87
3145	hSQ040271	|| HMBS || Hydroxymethylbilane synthase || Hs.82609 || NM_000190 || || 3145 || hCM001055 || 1414650	-0.33	-0.24	1.03	0.09	0.17	0.05	0.35	0.29	0.56	0.59	0.47	-0.3	-0.2	0.43	0.425	0.12	0.42	-0.35	-0.27	0.07	1.04	0.98
56894	hSQ014344	|| || || || NM_031487 || || || hHR007610 || 1414661	-0.15	0.03	-0.6	-0.86	-0.71	-1.02	-1.25	-0.81	-1.26	-1.31	-1.23	-1.26	-0.46	-1.89	-0.485	-0.99	-0.31	-0.15	-0.1	-0.52	0.15	-1.1
441614	hSQ005740	|| || || || XM_497304 || || || hHR028808 || 1414677	-0.26	-0.13	0.61	-0.03	-0.38	-0.17	0.78	0.8	1.2	0.92	1.08	-0.02	0.36	0.55	2.225	2.01	2.05	1.71	0.88	0.87	1.77	1.58
51478	hSQ014153	|| HSD17B7 || Hydroxysteroid (17-beta) dehydrogenase 7 || Hs.492925 || NM_016371 || || 51478 || hHR029837 || 1414683	-1.37	-0.98	-0.36	-0.77	-0.08	-0.15	-0.39	-0.78	-0.56	-0.25	-1.11	-1.01	-0.29	-0.17	-0.705	-0.72	-0.35	-0.87	0.54	0.56	-0.63	1.03
23636	hSQ005483	|| NUP62 || Nucleoporin 62kDa || Hs.574492 || NM_153719 || || 23636 || hHR007840 || 1414692	-0.38	-0.07	0.18	-0.42	0.18	0.04	-0.77	-0.72	-0.93	-0.72	-0.85	-0.8	0.06	-0.71	-0.615	-0.6	-0.67	-0.77	0.08	-0.21	-0.3	-0.31
401725	hSQ042271	|| || || || XM_377278 || || || hHR028168 || 1414699	1.83	2	0.83	0.72	1.68	1.81	2.67	2.71	1.77	1.13	2.2	1.58	2.15	2.23	-0.985	-0.66	-1.2	-1.55	-0.27	0.18	-1.35	-0.17
6845	hSQ013556	|| SYBL1 || Synaptobrevin-like 1 || Hs.24167 || NM_005638 || || 6845 || hHR008036 || 1414737	-0.76	-0.68	-1.15	-1.09	-0.36	-0.66	-0.39	-0.32	0.6	0.38	-0.78	-0.05	-0.17	0.52	0.875	0.71	0.9	0.73	0.89	1.16	0.77	0.25
5604	hSQ024931	|| MAP2K1 || Mitogen-activated protein kinase kinase 1 || Hs.145442 || NM_002755 || || 5604 || hHR027668 || 1414786	-0.01	0.08	0.03	-0.23	-0.21	0.12	0.7	0.63	0.25	0.22	-0.31	-0.55	0.52	0.13	-0.285	-0.37	-0.63	-0.19	0.04	-0.61	-0.21	-0.41
51244	hSQ003066	|| C3orf19 || Chromosome 3 open reading frame 19 || Hs.517820 || NM_016474 || || 51244 || hHR006832 || 1414792	0.13	0.06	-0.43	-0.76	-0.5	-0.6	0.87	1.16	-1.13	-1.26	-0.75	-1.17	-0.12	-2	0.065	-0.25	-0.11	-0.1	-0.06	-0.69	-0.03	-0.83
6599	hSQ035077	|| SMARCC1 || SWI/SNF related, matrix associated, actin dependent regulator of chromatin, subfamily c, member 1 || Hs.476179 || NM_003074 || || 6599 || hHR013469 || 1414798	0.45	0.71	-0.4	-0.96	0.25	0.59	0.74	0.99	0.23	0.18	-0.05	-0.07	0.54	0.1	-0.465	-0.36	-0.71	-1.4	-0.08	-0.43	-0.52	0.05
23583	hSQ006172	|| SMUG1 || Single-strand-selective monofunctional uracil-DNA glycosylase 1 || Hs.632721 || NM_014311 || || 23583 || hHR010455 || 1414812	-0.27	-0.4	0.16	0.16	0.15	0.2	0.48	0.31	0.79	1.32	0.73	2.98e-09	-0.04	0.35	0.885	1.16	0.5	0.19	-0.03	0.38	0.81	1.25
253725	hSQ003305	|| FAM21C || Family with sequence similarity 21, member C || Hs.365286 || NM_015262 || || 253725 || hHR031368 || 1414828	0.29	0.62	-0.43	-0.29	0.27	0.69	-0.14	0.09	-0.13	-0.19	-0.45	-0.28	0.32	-0.48	-1.475	-1.4	-1.61	-1.1	-0.17	-0.29	-0.67	0.38
55522	hSQ044891	|| ILK || Integrin-linked kinase || Hs.655002 || AJ277481 || || 3611 || hHR009521 || 1414904	-0.21	-0.27	0.23	-0.05	-0.08	0.05	0.9	0.57	0.26	0.5	0.79	-0.21	0.4	0.05	0.315	0.44	0.17	-0.13	0.07	0.22	-3.58e-09	1.84
284230	hSQ012814	|| || || || XM_208185 || || || hHR030031 || 1414908	-0.34	-0.33	0.25	-0.46	0.01	0.18	0.89	0.85	0.52	0.95	-9.54e-09	-0.09	0.31	0.71	-0.815	-0.62	-1.8	-2.17	-0.25	-0.31	-1.58	0.97
124565	hSQ013967	|| MGC15523 || Hypothetical protein MGC15523 || Hs.352240 || NM_138570 || || 124565 || hHR019642 || 1414959	0.62	0.33	1.11	0.54	0.11	0.03	0.25	0.24	0.35	0.14	0.64	-0.66	0.07	-0.5	0.705	0.69	0.15	-0.56	-0.48	-0.84	0.84	0.55
6908	hSQ038535	|| TBP || TATA box binding protein || Hs.590872 || NM_003194 || || 6908 || hCM000872 || 1414969	0.34	0.14	-0.46	-0.17	-0.19	-0.01	1.05	1.18	0.91	1	0.3	0.03	0.48	0.15	1.155	0.99	1.73	1.69	0.87	1.31	1.42	0.27
255783	hSQ038870	|| LOC255783 || Hypothetical protein LOC255783 || Hs.128690 || BC022076 || || 255783 || hHR018514 || 1415024	0.8	0.53	1.53	1.07	1.04	1.42	0.47	0.54	1.15	0.73	1.71	0.59	0.65	1.06	1.855	1.75	1.34	-0.01	-0.25	0.26	1.38	1.64
22919	hSQ032789	|| MAPRE1 || Microtubule-associated protein, RP/EB family, member 1 || Hs.472437 || NM_012325 || || 22919 || hHR029600 || 1415041	0.63	0.68	0.58	0.12	0.56	0.57	0.95	0.9	0.81	0.74	0.11	0.59	0.89	0.63	0.015	-0.07	-0.18	0.23	0.35	0.37	0.16	0.67
440406	hSQ018956	|| || || || XM_496186 || || || hHR031565 || 1415057	-1.2	-1.3	-0.21	-0.67	-0.24	0.02	0.72	0.71	0.66	0.6	0.48	-0.96	0.31	0.35	1.205	1.39	0.68	0.19	-0.24	0.06	1.13	1.11
4200	hSQ026450	|| ME2 || Malic enzyme 2, NAD(+)-dependent, mitochondrial || Hs.233119 || NM_002396 || || 4200 || hHR027216 || 1415074	-0.02	-0.05	-1.06	-0.57	-0.04	-0.17	-1.88	-1.75	-0.86	-1.68	-0.2	0.02	-0.09	0.42	-1.095	-1.02	0.01	0.36	0.6	0.84	0.2	0.32
55780	hSQ030456	|| C6orf70 || Chromosome 6 open reading frame 70 || Hs.47546 || AK002014 || || 55780 || hHR006034 || 1415080	-0.99	-0.87	-0.84	-1.07	-1.2	-1.22	-0.78	-0.46	-0.52	-0.46	-0.84	-0.91	-0.61	-1	0.065	0	-0.03	-0.43	-0.07	0.13	-0.29	0.7
9909	hSQ015701	|| DENND4B || DENN/MADD domain containing 4B || Hs.632480 || AB007945 || || 9909 || hHR014166 || 1415095	0.27	0.31	-0.32	-0.52	0.01	0.18	-0.48	-0.63	-1.22	-1.05	-0.99	-1.13	-1.34e-09	-1.2	0.705	0.51	0.1	-0.09	0.55	-0.2	0.9	0.35
5052	hSQ008456	|| PRDX1 || Peroxiredoxin 1 || Hs.180909 || NM_002574 || || 5052 || hHR013103 || 1415163	-0.6	-0.47	0.47	-0.01	0.17	0.13	0.78	0.95	1.66	1.71	1.07	0.42	0.62	0.85	1.075	0.92	0.51	0.38	0.34	0.15	0.57	0.82
9993	hSQ029180	|| DGCR2 || DiGeorge syndrome critical region gene 2 || Hs.517357 || NM_005137 || || 9993 || hHR017731 || 1415165	0.08	-0.12	-0.13	-0.66	-1.08	-1.24	-0.41	-0.24	-0.73	-1.24	-0.31	-1.55	-0.59	-1.65	0.375	0.2	-0.69	-1.16	-0.74	-1.1	0.39	-0.27
83787	hSQ020748	|| ARMC10 || Armadillo repeat containing 10 || Hs.287412 || NM_031905 || || 83787 || hHR025875 || 1415193	-0.98	-1.14	-1.11	-1.16	-0.6	-0.39	0.27	0.28	0.42	0.64	0.29	0.4	-0.6	0.79	0.475	0.41	0.98	0.64	0.19	0.8	0.81	-0.04
341306	hSQ017590	|| || || || XM_497329 || || || hHR028584 || 1415194	-0.68	-0.63	-0.62	-0.77	-0.1	0.19	0.69	0.39	0.73	0.48	0.77	-0.12	0.06	1.39	0.245	0.09	1.19	0.6	0.57	1.3	1.22	1.52
3145	hSQ040269	|| HMBS || Hydroxymethylbilane synthase || Hs.82609 || NM_000190 || || 3145 || hCM000980 || 1415211	-0.15	-0.31	-0.24	-0.25	-0.46	-0.27	1.07	1.09	0.75	0.74	0.87	-0.59	-0.01	0.78	1.005	0.81	0.88	0.45	0.08	0.13	0.85	0.1
5007	hSQ015553	|| OSBP || Oxysterol binding protein || Hs.597091 || NM_002556 || || 5007 || hHR011289 || 1415316	0.65	0.86	0.66	0.28	0.8	0.97	0.22	0.16	-0.48	-0.67	-0.35	0.01	0.49	0.24	0.735	0.76	0.33	0.54	0.84	0.47	0.88	1.32
91252	hSQ015350	|| SLC39A13 || Solute carrier family 39 (zinc transporter), member 13 || Hs.523664 || NM_152264 || || 91252 || hHR007724 || 1415426	-0.04	0.04	0.12	-0.22	-0.08	-0.16	0.61	0.64	0.37	0.21	0.27	-0.75	-0.14	0.03	1.625	1.77	1.51	0.84	0.43	-0.14	1.57	0.48
5495	hSQ028273	|| PPM1B || Protein phosphatase 1B (formerly 2C), magnesium-dependent, beta isoform || Hs.416769 || NM_177968 || || 5495 || hHR012401 || 1415427	-0.9	-0.84	-1.35	-1.27	-0.98	-0.99	-0.49	-0.38	0.16	0.08	-0.43	-0.39	-0.17	0.42	0.495	0.13	0.56	0.82	0.65	0.26	0.64	0.1
2773	hSQ005898	|| GNAI3 || Guanine nucleotide binding protein (G protein), alpha inhibiting activity polypeptide 3 || Hs.73799 || NM_006496 || || 2773 || hHR003083 || 1415501	-0.26	-0.09	-0.5	-0.54	-0.16	-0.04	0.12	0.36	0.5	0.63	-0.01	0.12	0.32	0.8	0.425	0.22	0.12	0.26	0.4	0.04	0.34	-0.25
51236	hSQ042869	|| C8orf30A || Chromosome 8 open reading frame 30A || Hs.300224 || NM_016458 || || 51236 || hHR032064 || 1415505	1.63	1.44	1.59	1.07	1.77	1.28	0.64	0.68	0.61	0.54	1.02	0.29	0.86	0.33	1.095	1.33	1.15	0.58	0.28	-0.11	1.47	2.29
8733	hSQ021633	|| GPAA1 || Glycosylphosphatidylinositol anchor attachment protein 1 homolog (yeast) || Hs.627962 || NM_003801 || || 8733 || hHR024338 || 1415578	-0.18	-0.38	-0.05	-0.56	-0.54	-0.9	0.45	0.57	0.28	-0.03	-0.06	-0.7	-0.43	-0.84	0.725	1.14	0.82	0.5	-0.09	0.13	1.53	1.93
25906	hSQ021797	|| C11orf51 || Chromosome 11 open reading frame 51 || Hs.38044 || NM_014042 || || 25906 || hHR028269 || 1415640	0.91	0.94	0.85	0.62	0.93	0.88	2.65	2.43	1.41	1.47	1.12	0.73	1.42	0.9	-0.495	-0.34	-1.68	-1.23	-0.75	-0.57	-0.91	0.29
5504	hSQ045260	|| PPP1R2 || Protein phosphatase 1, regulatory (inhibitor) subunit 2 || Hs.535731 || NM_006241 || || 5504 || hHR030786 || 1415641	0.65	0.91	0.45	0.39	1.19	1.3	1.92	1.99	1.05	1.15	0.69	0.94	0.91	1.33	-0.375	-0.34	-0.56	-0.52	-0.01	-0.33	-0.23	-0.01
200810	hSQ029716	|| LOC200810 || Similar to beta-1,4-mannosyltransferase; beta-1,4 mannosyltransferase || Hs.591299 || NM_001015050 || || 200810 || hHR030269 || 1415720	-0.15	-0.32	0.59	0.19	-0.13	-0.29	0.73	0.85	1.58	1.31	1.16	-0.04	0.39	0.69	2.175	1.96	1.84	1.47	0.69	0.98	1.78	1.6
441019	hSQ045495	|| LOC441019 || Hypothetical gene supported by X97260; BC070289 || Hs.568282 || XM_498969 || || 441019 || hHR031412 || 1415727	-0.14	0.13	0.36	-0.13	-0.13	0.29	1.82	1.59	1.26	1.47	0.64	-0.26	0.6	0.63	1.675	1.55	0.41	0.04	0.1	-0.07	-0.2	0.5
6635	hSQ016231	|| SNRPE || Small nuclear ribonucleoprotein polypeptide E || Hs.334612 || NM_003094 || || 6635 || hHR028364 || 1415813	-1.5	-1.26	-0.67	-1.25	-0.52	-0.52	1	0.71	1.32	1.16	-0.31	-0.14	0.05	0.88	0.255	0.54	-0.88	-0.94	0.15	0.12	-1.15	0.9
6608	hSQ000696	|| SMO || Smoothened homolog (Drosophila) || Hs.437846 || NM_005631 || || 6608 || hHR017427 || 1415819	0.59	0.49	0.55	0.2	0.02	-0.12	0.05	0.41	0.19	0.11	0.25	-0.24	0.1	-0.89	0.655	0.58	0.45	-0.23	-0.09	-0.47	0.68	0.99
55502	hSQ042263	|| HES6 || Hairy and enhancer of split 6 (Drosophila) || Hs.42949 || NM_018645 || || 55502 || hHR004978 || 1415864	-1.85	-1.4	-0.13	-0.23	0.47	0.55	-0.01	-0.16	-0.27	-0.31	-0.19	-0.92	-0.42	0.61	0.085	0.53	0.43	-0.93	-0.61	-0.83	-0.05	-1.44
442037	hSQ006229	|| || || || XM_497862 || || || hHR028538 || 1415873	0.7	0.81	0.43	-0.06	0.48	0.42	2.36	2.16	1.49	1.64	0.91	0.31	1.25	-0.75	-1.105	-1.05	-2.19	-1.74	-1.01	-0.91	-2.44	-0.49
3145	hSQ018850	|| HMBS || Hydroxymethylbilane synthase || Hs.82609 || NM_000190 || || 3145 || hCM000950 || 1415891	0.1	-0.23	0.3	0.39	0.32	-0.23	0.47	0.6	0.36	0.5	0.8	-0.44	-0.37	0.19	0.275	-0.1	0.23	0.21	-0.42	0.09	1.03	0.58
23378	hSQ022956	|| KIAA0409 || KIAA0409 || Hs.652255 || NM_015324 || || 23378 || hHR005200 || 1415893	0.44	0.53	0.24	-0.16	0.21	0.42	1.04	1.05	0.17	0.13	0.33	0.27	0.75	0.1	0.365	0.1	0.25	0.21	0.38	0.05	0.03	-0.32
52	hSQ003228	|| || || || NM_177554 || || || hHR008728 || 1415910	-0.47	-0.66	-0.76	-0.44	-0.46	-0.53	-0.42	-0.34	-0.22	-0.14	0.33	0.27	-0.11	0.09	-0.695	-0.69	-0.67	-0.61	-0.29	0.58	-0.5	-0.04
3550	hSQ030976	|| IK || IK cytokine, down-regulator of HLA II || Hs.421245 || NM_006083 || || 3550 || hHR029622 || 1415912	-0.25	-0.37	-1.23	-1.47	-0.72	-0.75	1.18	1.6	-0.8	-0.7	-0.71	-1.3	0.26	-1.62	-3.175	-3.1	-4.65	-4.11	-1.67	-1.8	-2.77	-1.92
5457	hSQ005186	|| POU4F1 || POU domain, class 4, transcription factor 1 || Hs.654522 || NM_006237 || || 5457 || hHR010967 || 1415947	-0.82	-0.67	-0.72	-1.13	-0.89	-1.01	-0.99	-0.66	-1.18	-1.11	-1.39	-1.26	-0.1	-1	0.155	-0.28	-0.29	-0.38	0.01	-0.92	-0.41	-1.56
84191	hSQ022773	|| FAM96A || Family with sequence similarity 96, member A || Hs.439548 || NM_001014812 || || 84191 || hHR023394 || 1415986	-0.73	-0.66	-0.89	-0.91	-0.14	-0.3	1.08	0.97	1.23	1.15	0.72	0.22	0.23	0.94	-0.265	-0.14	-0.52	-0.71	-0.31	0.02	-0.47	-0.26
6926	hSQ045223	|| TBX3 || T-box 3 (ulnar mammary syndrome) || Hs.129895 || NM_016569 || || 6926 || hHR006483 || 1416026	-0.52	-0.45	-0.41	-0.47	-0.69	-0.36	-0.65	-0.15	-0.79	-0.75	-1.24	-0.78	-0.53	-1.03	-0.065	-0.35	-0.16	-0.47	-0.21	-0.49	-0.5	0.51
9555	hSQ023837	|| H2AFY || H2A histone family, member Y || Hs.420272 || NM_004893 || || 9555 || hHR011430 || 1416028	0.75	0.87	0.63	0.52	0.64	0.99	1.29	1.61	0.5	0.53	0.55	0.21	1.06	0.5	-0.505	-0.48	-0.59	-0.39	0.16	-0.18	-0.54	-0.09
115426	hSQ032896	|| || || || NM_152306 || || || hHR026752 || 1416038	-0.32	-0.25	-0.83	-0.67	-0.3	-0.6	-0.18	-0.1	-0.39	-0.11	-0.83	-0.49	-0.39	-0.56	0.915	0.93	1.13	0.76	0.81	0.67	1.03	0.65
2745	hSQ011024	|| GLRX || Glutaredoxin (thioltransferase) || Hs.28988 || NM_002064 || || 2745 || hHR026884 || 1416079	-1.45	-1.37	-0.52	-0.82	-0.21	-0.41	0.96	0.51	0.77	0.85	0.44	0.06	-0.04	1.14	0.245	0.24	0.56	-0.12	0.02	-0.14	-0.82	-0.02
8407	hSQ025189	|| TAGLN2 || Transgelin 2 || Hs.517168 || NM_003564 || || 8407 || hHR030562 || 1416125	0.24	0.09	1.06	0.22	0.42	0.59	1.02	1.33	1.07	1.29	0.91	-0.43	0.5	0.48	1.325	1.27	1.17	0.47	0.19	-0.11	1.3	1.34
440684	hSQ027769	|| || || || XM_496405 || || || hHR029816 || 1416136	-0.14	-0.24	0.32	-0.04	0.15	-0.01	1.03	1.13	1.52	1.32	0.81	0.06	0.52	0.81	1.155	1.1	0.57	0.15	0.11	0.29	0.49	1.16
54537	hSQ036416	|| FAM35A || Family with sequence similarity 35, member A || Hs.500419 || NM_019054 || || 54537 || hHR030650 || 1416153	-0.83	-0.54	-0.67	-0.91	-0.49	-0.4	-0.73	-0.7	-0.16	-0.03	-1.01	0.21	-0.51	0.01	0.455	0.27	0.9	1.04	0.51	0.59	0.24	-0.12
57798	hSQ020137	|| GATAD1 || GATA zinc finger domain containing 1 || Hs.21145 || NM_021167 || || 57798 || hHR008011 || 1416197	-1.42	-1.41	-1.15	-1.61	-1.85	-1.81	-1.31	-0.97	-1.11	-1.07	-1.82	-1.55	-0.59	-1.52	0.035	-0.03	-0.18	-0.34	0.4	-0.17	-0.12	0.37
10608	hSQ015762	|| MXD4 || MAX dimerization protein 4 || Hs.655020 || NM_006454 || || 10608 || hHR023764 || 1416204	0.55	0.42	1.06	0.38	-0.08	-0.21	0.2	0.38	-0.12	-0.7	0.46	-0.61	-0.67	-1.39	1.225	1.04	0.51	-0.71	-0.51	-0.85	0.92	0.65
391356	hSQ040734	|| LOC391356 || Similar to CG14903-PA || Hs.406607 || NM_001013663 || || 391356 || hHR014946 || 1416278	-0.22	-0.26	-0.19	-0.6	0.23	0.16	1.37	1.24	1.2	0.88	1.19	0.28	-0.04	1.27	1.285	1.17	0.47	0.31	-0.07	0.37	0.81	1.21
92703	hSQ034515	|| TMEM183A || Transmembrane protein 183A || Hs.497443 || NM_138391 || || 92703 || hHR031372 || 1416300	-0.36	-0.35	0.05	-0.46	0.17	0.31	0.39	0.42	0.51	0.97	0.02	0.1	0.2	0.34	0.855	0.75	0.92	0.53	0.6	0.88	0.61	1.89
6299	hSQ014436	|| SALL1 || Sal-like 1 (Drosophila) || Hs.135787 || NM_002968 || || 6299 || hHR026310 || 1416327	1.64	1.83	0.43	0.77	1.11	1.72	1.6	1.82	1.36	1.08	0.92	0.73	1.01	1.04	0.455	0.5	0.45	0.84	0.86	0.25	0.31	0.21
162835	hSQ015856	|| || || || XM_091830 || || || hHR028224 || 1416342	5.57	5.44	4.14	3.95	4.75	5.01	0.44	-0.51	-0.98	-1.2	2.45	1.74	1.67	1.47	0.845	1.49	1.33	0.51	-0.38	-0.31	1.27	1.05
79033	hSQ015955	|| PRNPIP || Prion protein interacting protein || Hs.132497 || AF007157 || || 79033 || hHR022839 || 1416349	0.64	0.56	1.08	0.59	0.77	0.73	0.99	0.98	0.94	1.27	1.05	0.46	0.59	0.71	1.245	1.36	0.67	-6.71e-10	-0.23	0.23	0.75	1.64
9798	hSQ044107	|| KIAA0174 || KIAA0174 || Hs.232194 || NM_014761 || || 9798 || hHR028330 || 1416392	-0.22	-0.22	0.17	-0.18	-0.26	-0.09	0.39	0.64	0.89	1.05	0.49	-0.38	0.69	0.29	1.045	0.98	0.69	0.56	0.54	0.53	0.88	0.43
29128	hSQ018897	|| UHRF1 || Ubiquitin-like, containing PHD and RING finger domains, 1 || Hs.108106 || NM_013282 || || 29128 || hHR030114 || 1416410	-0.02	0.13	-0.07	-0.58	-0.17	-0.16	-0.24	0.01	-0.84	-0.98	-1.44	-1.28	-0.23	-0.88	0.085	0.2	-0.82	-0.53	0.23	-0.33	-0.2	0.69
127687	hSQ006538	|| C1orf122 || Chromosome 1 open reading frame 122 || Hs.532749 || NM_198446 || || 127687 || hHR019646 || 1416437	-0.76	-0.81	-0.18	-0.4	0.59	0.43	0.77	0.75	0.55	0.73	0.87	-0.07	-0.06	0.84	1.315	1.39	0.79	0.23	-0.45	-0.27	1.19	1.1
442536	hSQ014702	|| || || || XM_499281 || || || hHR027863 || 1416487	0.8	0.69	0.71	0.29	0.64	0.98	1.96	2.02	1.42	1.52	1.5	0.26	0.77	1.01	1.175	1.14	0.08	-0.07	-0.31	0.04	0.55	0.45
23367	hSQ013305	|| LARP1 || La ribonucleoprotein domain family, member 1 || Hs.292078 || NM_015315 || || 23367 || hHR023038 || 1416530	0.67	0.43	1.03	0.06	-0.12	-0.35	-1.65	-1.24	-1.66	-1.61	-1.55	-1.49	-0.91	-2.83	-0.855	-1.37	-1.82	-1.37	-1.62	-1.42	-0.93	-0.3
54844	hSQ021710	|| C6orf61 || Chromosome 6 open reading frame 61 || Hs.279008 || AK000177 || || 54844 || hHR006016 || 1416536	-0.32	-0.23	-0.3	-0.52	-0.16	-0.11	-0.45	-0.88	-1.36	-0.98	-1.3	-0.52	-0.3	-0.64	-0.115	-0.16	-0.64	-0.29	0.23	-0.07	0.23	0.55
1810	hSQ021451	|| DR1 || Down-regulator of transcription 1, TBP-binding (negative cofactor 2) || Hs.348418 || NM_001938 || || 1810 || hHR009728 || 1416557	-0.68	-0.53	-1.27	-0.74	-0.52	-0.29	-0.46	-0.66	0.03	-0.27	-0.44	-0.05	-0.24	0.56	0.115	0.17	0.95	0.88	0.8	0.68	0.61	0.63
56947	hSQ001002	|| C2orf33 || Chromosome 2 open reading frame 33 || Hs.471528 || NM_020194 || || 56947 || hHR023231 || 1416562	-0.56	-0.37	-0.33	-0.11	0.02	0.62	0.11	-0.02	0.16	0.35	-0.26	-0.13	-0.5	-0.1	-0.125	-0.23	0.58	-0.18	0.14	0.49	0.16	0.62
310	hSQ014801	|| ANXA7 || annexin A7 || Hs.631827 || || || 310 || hCT001302 || 1416569	-0.26	-0.26	-0.58	-0.52	0.06	-0.07	-0.08	-0.25	0.27	0.27	0.21	0.08	0.14	0.16	-0.275	-0.29	0.47	0.43	0.52	0.83	0.61	1.11
440271	hSQ018521	|| || || || XM_498606 || || || hHR031012 || 1416613	-1.66	-1.43	-2.02	-2.01	-1.49	-1.35	1.06	0.77	-1.31	-1.21	-0.55	-2.06	0.39	-2.34	-2.555	-1.97	-2.47	-3.47	-2.29	-4.25	-2.01	-4.24
317749	hSQ020888	|| DHRS4 || Dehydrogenase/reductase (SDR family) member 4 || Hs.528385 || NM_198083 || || 10901 || hHR031654 || 1416709	-0.55	-0.52	0.25	-0.38	-0.48	-0.37	0.47	0.17	0.17	-0.05	0.16	-1.06	0.11	-0.32	-0.945	-0.58	-1.18	-1.93	-0.42	-0.5	-0.32	-0.39
9374	hSQ017324	|| || || || NM_138934 || || || hHR010004 || 1416785	-1.86	-1.67	-1.97	-1.7	-2.24	-2.55	-0.24	-0.35	-1.4	-1.3	-1.36	-2.65	-1.36	-4.4	0.115	0.14	-0.06	-1.25	-0.46	-1.68	0.01	-2.12
3476	hSQ037396	|| IGBP1 || Immunoglobulin (CD79A) binding protein 1 || Hs.496267 || NM_001551 || || 3476 || hHR022500 || 1416894	0.79	0.96	0.65	0.38	0.94	0.97	2	2.03	1.27	1.37	1.71	0.6	1.29	0.94	0.255	0.24	5.96e-10	-0.47	0.32	0.3	-0.34	1.19
442454	hSQ008764	|| || || || XM_498369 || || || hHR028109 || 1416902	-0.02	0.38	0.57	0.24	1.03	1.11	1.54	1.37	0.42	1.34	-0.5	0.9	1.06	0.91	-1.635	-1.9	-4.79	-3.2	-0.77	-0.41	-2.97	0.11
23164	hSQ008127	|| M-RIP || Myosin phosphatase-Rho interacting protein || Hs.462341 || NM_015134 || || 23164 || hHA033324 || 1416904	1.62	1.87	0.88	0.43	0.82	1.08	0.56	0.71	-0.43	-0.59	-0.16	-0.61	0.23	-0.59	-0.385	-0.39	-0.56	-1.3	-0.28	-1.1	-0.24	-1.72
23141	hSQ019958	|| KIAA0692 || KIAA0692 || Hs.654628 || AB014592 || || 23141 || hHR003064 || 1416969	0.42	0.68	0.14	0.05	1.16	1.08	-0.46	-0.45	-0.68	-0.52	-0.46	0.4	0.41	0.28	-0.715	-0.84	-0.71	-0.46	-0.06	-0.26	-0.57	-0.03
56681	hSQ036038	|| SAR1A || SAR1 gene homolog A (S. cerevisiae) || Hs.499960 || NM_020150 || || 56681 || hHR024118 || 1417019	-0.82	-0.7	-0.66	-1.07	-0.75	-0.92	-0.63	-0.25	0.38	0.57	-0.42	-0.54	0.06	0.27	0.445	0.25	0.46	-0.06	0.38	0.08	0.07	0.51
114034	hSQ016477	|| TOE1 || Target of EGR1, member 1 (nuclear) || Hs.525091 || NM_025077 || || 114034 || hHR016922 || 1417044	2.3	1.91	-0.4	-0.37	-0.26	-0.61	-0.47	-0.68	-0.49	-0.71	0.15	-0.15	-0.32	-0.77	-0.775	-0.54	-0.49	-0.42	0.29	0.61	0.1	0.76
65059	hSQ045358	|| RAPH1 || Ras association (RalGDS/AF-6) and pleckstrin homology domains 1 || Hs.471162 || NM_213589 || || 65059 || hHR004376 || 1417094	2.59	2.73	1.59	1.57	2.62	2.52	2.17	2.49	0.96	0.93	0.9	1.55	1.83	1.1	0.445	0.58	0.16	0.08	0.5	0.11	0.52	0.6
285840	hSQ042054	|| || || || AL050332 || || || hHR030171 || 1417153	1.26	1.17	1.55	0.83	1.18	1.2	1.3	1.22	1.38	1.19	1.09	0.62	0.74	0.7	1.765	1.56	1.8	1.01	1	0.75	2.08	2.63
9603	hSQ001920	|| NFE2L3 || Nuclear factor (erythroid-derived 2)-like 3 || Hs.404741 || NM_004289 || || 9603 || hHR030156 || 1417154	-0.61	-0.54	-1.07	-1.22	-0.55	-0.8	0.01	0.04	0.64	0.53	-9.54e-09	-0.09	0.32	-0.02	-0.355	-0.43	-0.24	-0.18	-0.17	-0.59	-0.78	-0.98
6774	hSQ037174	|| STAT3 || Signal transducer and activator of transcription 3 (acute-phase response factor) || Hs.463059 || NM_139276 || || 6774 || hHR016229 || 1417159	0.96	0.84	0.72	0.16	0.58	0.74	0.68	0.75	-0.03	-0.09	0.38	-0.52	0.24	-0.7	0.405	0.33	0.83	0.55	-0.08	-0.33	0.63	1.2
23030	hSQ015817	|| JMJD2B || Jumonji domain containing 2B || Hs.654816 || NM_015015 || || 23030 || hHR011897 || 1417185	-0.67	-0.66	-0.83	-1.28	-0.8	-0.51	-0.77	-0.72	-2.15	-1.82	-1.88	-2.01	-0.84	-1.96	-0.565	-0.78	-1.19	-2.18	-0.86	-1.57	-0.36	-1.39
285900	hSQ015124	|| || || || || || || hHR030275 || 1417197	1.13	1.47	1.41	0.55	2.18	2.24	2.33	2.08	1.01	1.56	0.9	1.23	1.82	2.36	-1.275	-1.02	-1.73	-1.85	0.02	-0.02	-2.02	0.01
11042	hSQ005853	|| || || || NM_021036 || || || hHR031522 || 1417235	-1.51	-1.56	-1.18	-1.56	-1.8	-1.65	-0.88	-0.84	-1.21	-1.63	-1.47	-2.24	-1.24	-2.11	-0.385	-0.27	-0.43	-0.61	-0.37	-0.55	-0.03	-0.9
401016	hSQ033874	|| || || || XM_376150 || || || hHR027162 || 1417238	-0.44	-0.16	-0.42	-1	0.36	0.12	0.4	0.4	-0.05	0.47	-0.07	0.34	0.13	1.49	-1.465	-1.4	-1.74	-1.67	-0.29	0.45	-1.65	-0.14
10383	hSQ021335	|| TUBB2C || Tubulin, beta 2C || Hs.433615 || NM_006088 || || 10383 || hHR026561 || 1417286	-0.3	-0.55	-0.41	-0.67	-0.42	-0.41	-1.71	-1.67	-1.11	-0.77	0.12	-0.88	-0.49	0.22	-1.005	-0.94	-1.03	-1.53	-1.25	-0.06	0.33	-0.25
158160	hSQ023876	|| || || || NM_182829 || || || hHR028436 || 1417299	-0.82	-0.54	-0.77	-0.42	-0.13	-0.67	0.28	-0.06	-0.24	-0.18	-0.02	-0.48	-0.06	0.1	-0.305	-0.23	0.53	0.29	0.99	0.84	0.16	0.43
22929	hSQ036676	|| SEPHS1 || Selenophosphate synthetase 1 || Hs.124027 || NM_012247 || || 22929 || hHR030357 || 1417359	-0.59	-0.53	-0.43	-0.67	-0.58	-0.4	-0.32	-0.38	-0.44	-0.62	-1.19	-0.54	0.06	-0.16	-0.555	-0.84	-1.06	-0.33	0.08	-0.38	-0.25	0.01
5939	hSQ019098	|| RBMS2 || RNA binding motif, single stranded interacting protein 2 || Hs.645521 || NM_002898 || || 5939 || hHR030454 || 1417389	1.14	1.17	0.8	0.46	0.8	0.94	1.52	1.59	1.5	1.74	1.26	0.89	1.1	0.39	1.995	1.64	2.04	1.7	1.05	0.89	1.08	0.84
1353	hSQ034537	|| COX11 || COX11 homolog, cytochrome c oxidase assembly protein (yeast) || Hs.591171 || NM_004375 || || 1353 || hHR012215 || 1417394	-1.63	-1.5	-1.49	-1.94	-1.54	-1.63	-0.5	-0.5	-0.47	-0.52	-0.8	-1.55	-0.63	-0.63	0.095	-0.15	-0.69	-0.46	-0.12	-0.49	-0.26	-1.01
3251	hSQ021313	|| HPRT1 || Hypoxanthine phosphoribosyltransferase 1 (Lesch-Nyhan syndrome) || Hs.412707 || NM_000194 || || 3251 || hCM000838 || 1417407	-1.66	-1.63	-1.38	-1.41	-1.05	-1.31	-0.01	0.14	0.8	1.02	-0.42	-0.36	-0.56	0.13	0.115	0.02	0.7	0.15	0.68	0.75	0.07	0.81
220832	hSQ006957	|| || || || || || || hHR029731 || 1417411	-1.31	-1.24	-0.57	-0.81	-0.47	-0.65	1.01	1.02	0.84	0.92	0.08	-0.26	0.33	0.36	-0.035	0.18	-0.51	-0.77	-0.18	-0.09	-1.45	0.96
56943	hSQ022250	|| ENY2 || Enhancer of yellow 2 homolog (Drosophila) || Hs.492555 || NM_020189 || || 56943 || hHR010992 || 1417414	-0.91	-0.64	-0.16	-0.76	-0.03	-0.13	1.4	1.18	0.71	1.02	-0.16	-0.34	0.83	0.91	-1.645	-1.42	-2.83	-2.41	-1.04	-1.18	-2.92	-0.05
7343	hSQ034139	|| UBTF || Upstream binding transcription factor, RNA polymerase I || Hs.89781 || NM_014233 || || 7343 || hHR020877 || 1417433	2.39	2.35	1.6	1.02	1.43	1.53	0.96	0.92	-0.1	-0.53	0.78	0.05	0.73	-0.1	0.195	-0.34	-0.09	-0.78	-0.71	-1.17	0.4	0.09
6717	hSQ021358	|| SRI || Sorcin || Hs.489040 || NM_003130 || || 6717 || hHR027320 || 1417442	-0.76	-0.6	-0.71	-0.64	-0.33	-0.33	0.22	0.44	0.89	0.78	0.07	0.12	0.06	0.62	-0.155	0.07	-0.22	-0.12	2.24e-10	-0.42	-0.14	0.06
949	hSQ005227	|| UBC || Ubiquitin C || Hs.520348 || NM_005505 || || 7316 || hHR002791 || 1417463	-0.09	0.07	0.02	-0.59	0.58	0.92	-1.07	-0.74	-0.8	-0.7	-1.04	-0.89	-0.19	-0.49	-1.025	-0.55	-0.48	-1.17	-0.38	-0.7	-0.94	-2.39
6908	hSQ012543	|| TBP || TATA box binding protein || Hs.590872 || NM_003194 || || 6908 || hCM000998 || 1417529	0.57	0.38	-0.37	-0.27	-0.3	0.03	0.59	0.77	0.91	1.02	0.29	-0.16	0.24	-0.02	0.735	0.26	1.53	1.57	0.63	1.26	1.56	0.51
10121	hSQ015206	|| ACTR1A || ARP1 actin-related protein 1 homolog A, centractin alpha (yeast) || Hs.153961 || NM_005736 || || 10121 || hHR026967 || 1417559	0.59	0.32	0.57	0.3	0.64	0.3	0.3	0.36	0.39	0.67	0.83	0.09	0.51	-0.14	0.385	0.49	0.51	-0.04	0.14	0.29	0.95	2.11
2553	hSQ042626	|| GABPB2 || GA binding protein transcription factor, beta subunit 2 || Hs.654350 || NM_005254 || || 2553 || hHR005548 || 1417566	0.47	0.49	0.51	0.26	0.54	0.79	0.79	0.99	0.17	0.58	-0.16	0.03	-0.12	-0.01	0.655	0.32	0.38	0.49	0.41	0.45	0.48	0.87
5870	hSQ031211	|| RAB6A || RAB6A, member RAS oncogene family || Hs.503222 || NM_002869 || || 5870 || hHR029803 || 1417581	-0.22	-0.18	-0.09	-0.16	-0.42	-0.28	0.52	0.64	0.7	0.61	-0.18	0.05	0.18	0.19	0.255	0.06	-0.34	-0.02	0.17	-0.58	-0.23	0.04
389901	hSQ040845	|| LOC389901 || Similar to ATP-dependent DNA helicase 2 subunit 1 (ATP-dependent DNA helicase II 70 kDa subunit) (Lupus Ku autoantigen protein p70) (Ku70) (70 kDa subunit of Ku antigen) (Thyroid-lupus autoantigen) (T || Hs.567992 || XM_372262 || || 389901 || hHR030634 || 1417603	1.14	1.09	0.63	0.1	0.61	0.76	1.08	1.57	0.8	1.01	1.16	0.27	1.09	0.17	-0.395	-0.51	-0.61	-0.82	-0.29	-0.33	-0.3	-0.01
9126	hSQ012631	|| SMC3 || Structural maintenance of chromosomes 3 || Hs.24485 || NM_005445 || || 9126 || hHR021105 || 1417619	-0.07	-0.2	-2.05	-1.17	-0.86	-0.89	-1.89	-1.82	-2.48	-7.2	-1.2	-0.99	-0.44	-1.25	-3.755	-3.73	-3.79	-4.15	-1.91	-1	-2.69	-2.8
228	hSQ019107	|| ALDOAP2 || Aldolase A, fructose-bisphosphate pseudogene 2 || Hs.652473 || M21191 || || 228 || hHR023782 || 1417660	1.84	1.65	1.87	1.26	1.86	1.56	1.53	1.41	1.36	1.24	1.67	0.79	0.89	1.09	1.345	1.27	1.2	0.56	0.02	0.66	1.47	1.69
222962	hSQ042265	|| SLC29A4 || Solute carrier family 29 (nucleoside transporters), member 4 || Hs.4302 || NM_153247 || || 222962 || hHR029322 || 1417676	2.36	2.29	1.64	1.15	1.7	1.58	2	1.95	2.13	1.69	2.17	0.68	1.38	0.84	1.995	2.11	1.49	0.75	0.12	-0.82	1.49	0.68
2503	hSQ027223	|| || || || AC023644 || || || hHR029415 || 1417719	0.28	0.37	0.55	0.01	0.37	0.64	0.85	0.87	0.63	0.71	-0.31	-0.15	0.99	0.38	0.155	0.17	0.39	-0.26	0.32	0.59	0.32	1.08
6389	hSQ038008	|| SDHA || Succinate dehydrogenase complex, subunit A, flavoprotein (Fp) || Hs.440475 || NM_004168 || || 6389 || hCM001107 || 1417755	0.2	0.2	-0.07	-0.42	-0.22	-0.74	-0.04	-0.14	-0.24	0.14	-0.23	-0.5	0.21	-0.54	-1.525	-1.42	-1.43	-0.75	0.29	0.45	-0.13	0.71
90673	hSQ011481	|| PPP1R3E || Protein phosphatase 1, regulatory (inhibitor) subunit 3E || Hs.601513 || AK024489 || || 90673 || hHR017196 || 1417803	-0.91	-0.91	-1.24	-1.56	-1.37	-1.42	-1.43	-1.2	-1.34	-1.4	-1.27	-2.02	-0.29	-2.05	-1.575	-1.39	-1.68	-1.7	-1.56	-2.07	-0.95	-3.16
170463	hSQ001818	|| SSBP4 || Single stranded DNA binding protein 4 || Hs.515259 || NM_032627 || || 170463 || hHR030100 || 1417845	0.27	0.19	0.5	0.05	0.8	0.45	1.37	1.51	0.9	0.87	0.71	-0.05	0.24	0.34	1.535	1.84	1.3	0.26	-0.06	-0.55	1.48	1.41
130814	hSQ032291	|| PQLC3 || PQ loop repeat containing 3 || Hs.274415 || NM_152391 || || 130814 || hHR007022 || 1417877	-0.69	-0.63	-0.73	-0.83	-0.76	-0.91	0.4	0.26	1.26	1.18	0.45	-0.49	-0.33	0.39	0.745	0.5	0.84	0.49	0.2	-0.26	0.36	0.03
6154	hSQ025536	|| RPL26 || Ribosomal protein L26 || Hs.645380 || NM_000987 || || 6154 || hHR030219 || 1417890	-1.97	-1.66	-0.84	-1.47	-0.36	-0.46	-0.14	-0.06	-0.69	-0.06	-1.44	-0.92	-0.81	0.32	-2.015	-1.96	-2.71	-2.87	-0.3	-0.26	-3.2	-0.14
400586	hSQ035647	|| || || || XM_375424 || || || hHR027846 || 1417915	0.67	0.65	0.64	0.69	0.56	1.07	0.99	0.91	1.09	0.89	1.43	0.85	1	0.57	0.885	0.66	0.83	0.17	-0.22	-0.29	-0.11	-0.65
79680	hSQ029806	|| GNB1L || Guanine nucleotide binding protein (G protein), beta polypeptide 1-like || Hs.105642 || NM_024627 || || 54584 || hHR018416 || 1417919	-0.74	-0.71	-0.51	-0.77	-0.88	-0.85	-1.74	-1.67	-1.83	-1.76	-1.77	-1.66	-0.85	-2.23	-0.665	-0.82	-1.06	-1.76	-0.88	-1.09	-0.34	-0.43
5872	hSQ021522	|| RAB13 || RAB13, member RAS oncogene family || Hs.151536 || NM_002870 || || 5872 || hHR031464 || 1417929	-1.79	-1.81	-0.87	-2.06	-1.3	-1.51	-2.47	-2.42	-2.4	-2.17	-2.69	-2.77	-1.28	-3.56	-3.455	-3.73	-4.38	-3.75	-3.12	-2.45	-2.89	-3.75
390956	hSQ012023	|| || || || XM_372741 || || || hHR029575 || 1417936	-0.56	-0.3	0.29	-0.22	-0.08	-0.02	0.86	0.51	0.55	1.05	0.53	0.16	-0.12	1.23	0.595	0.68	0.55	0.55	0.4	0.87	-0.12	0.92
439994	hSQ045281	|| LOC439994 || Hypothetical gene supported by AF064843; AK025716 || Hs.656043 || XM_498491 || || 439994 || hHR030902 || 1418008	-2.01	-1.77	-0.46	-0.73	-0.38	-0.33	-1.33	-1.34	-0.99	-0.67	-1.25	-0.98	-0.72	-0.54	-0.435	-0.51	-0.93	-0.9	-0.91	-0.58	-0.66	-0.08
196383	hSQ024936	|| MGC7036 || Hypothetical protein MGC7036 || Hs.488173 || NM_145058 || || 196383 || hHR031019 || 1418054	-1.95	-1.75	-1	-1.73	-1.5	-0.92	-1.02	-0.78	-1.25	-1.19	-1.74	-1.92	-0.26	-1.19	-1.965	-1.64	-3.71	-2.55	-0.81	-2	-1.81	-2.54
6908	hSQ012546	|| TBP || TATA box binding protein || Hs.590872 || NM_003194 || || 6908 || hCM000976 || 1418112	0.42	0.34	-0.37	-0.22	-0.31	-0.68	0.53	0.82	0.73	0.62	0.17	-0.1	0.4	0.1	0.845	0.55	1.57	1.47	0.56	1.22	1.55	0.71
3190	hSQ008796	|| HNRPK || Heterogeneous nuclear ribonucleoprotein K || Hs.522257 || NM_002140 || || 3190 || hHR028673 || 1418122	-0.4	-0.02	0.32	-0.54	0.02	0.22	-0.38	-0.48	-0.62	-0.37	-0.98	0.02	0.18	-0.16	-0.965	-1.17	-1.32	-0.95	-0.16	-0.28	-1.68	0.72
6185	hSQ012900	|| RPN2 || Ribophorin II || Hs.370895 || NM_002951 || || 6185 || hCT000597 || 1418163	1.82	1.76	0.73	1.02	1.38	1.96	0.22	-0.23	0.13	-0.99	1.22	1.01	1.23	1.17	0.885	1.04	1.85	2.45	1.34	2.03	1.66	1.04
442293	hSQ030813	|| || similar to glycine cleavage system protein H (aminomethyl carrier) || || || || || hHR026696 || 1418232	-1.2	-1.32	-0.88	-1.05	-0.84	-0.76	0.18	-0.02	0.19	-0.45	0.2	-0.38	-0.13	0.74	0.375	0.77	0.61	0.52	0.42	0.74	0.19	-1.06
440577	hSQ008863	|| || || || XM_496355 || || || hHR029200 || 1418233	1.05	1.23	0.22	-0.37	0.46	0.41	2.82	2.93	1.39	1.67	1.16	0.93	1.7	0.56	-1.475	-1.35	-1.77	-2.03	-0.53	-0.75	-2.08	-0.41
9955	hSQ043040	|| HS3ST3A1 || Heparan sulfate (glucosamine) 3-O-sulfotransferase 3A1 || Hs.462270 || NM_006042 || || 9955 || hHR006591 || 1418246	-0.32	-0.14	0.36	-0.13	7.15e-09	0.22	0.33	0.48	-0.25	0.1	-0.66	-0.7	-0.67	-0.16	-0.405	-0.14	-0.27	-0.62	-0.44	-0.96	-0.13	-0.44
120318	hSQ014239	|| || || || XM_497316 || || || hHR016618 || 1418277	1.29	1.55	0.81	0.16	1.08	1.18	2.24	2.24	1.92	2.22	1.88	1.4	2.35	1.97	-0.825	-0.87	-2.27	-1.49	-0.05	0.09	-1.69	-0.81
523	hSQ017615	|| ATP6V1A || ATPase, H+ transporting, lysosomal 70kDa, V1 subunit A || Hs.477155 || NM_001690 || || 523 || hHR001893 || 1418319	-0.68	-0.61	-0.52	-0.56	-0.54	-0.38	-0.47	-0.26	0.11	0.09	-0.46	-0.43	0.05	0.32	0.735	0.68	0.15	0.4	0.6	0.39	0.18	0.42
303	hSQ008815	|| ANXA2P1 || Annexin A2 pseudogene 1 || Hs.546235 || M62896 || || 303 || hHR026129 || 1418322	0.89	1.03	0.15	0.01	0.72	0.47	2.77	2.8	1.84	1.83	2.33	1.1	1.77	1.33	0.845	0.63	1.11	0.47	0.57	0.62	-0.18	0.23
9045	hSQ023280	|| RPL14 || Ribosomal protein L14 || Hs.446522 || NM_003973 || || 9045 || hHR020266 || 1418327	-0.95	-0.81	-1.56	-1.81	-1.02	-1.06	0.9	1.11	0.24	0.37	-0.04	-0.43	0.32	-0.29	-1.025	-0.82	-1.41	-1.94	-0.57	-0.71	-2.3	-0.82
51535	hSQ026594	|| PPHLN1 || Periphilin 1 || Hs.444157 || NM_016488 || || 51535 || hHR012381 || 1418352	0.28	0.47	0.08	-0.05	0.66	0.93	0.55	0.65	-0.15	-8.94e-10	-0.23	0.13	0.48	0.33	-0.215	-0.35	-0.59	-0.3	0.28	-0.14	-0.26	0.48
9859	hSQ011893	|| CEP170 || Centrosomal protein 170kDa || Hs.533635 || NM_014812 || || 9859 || hHR029866 || 1418371	0.18	0.27	-0.34	-0.78	-0.08	0.11	-0.59	-0.25	-0.18	-8.94e-10	-0.59	-0.25	-0.06	0.57	0.675	0.5	0.39	0.36	0.53	-0.26	-0.27	-0.03
200933	hSQ033350	|| FBXO45 || F-box protein 45 || Hs.518526 || AK025697 || || 200933 || hHR012604 || 1418382	-0.98	-0.97	-0.9	-0.47	-0.61	-0.77	-0.65	-0.64	-0.47	-0.18	-0.85	-0.12	-0.36	0.16	0.205	0.15	0.26	0.37	0.38	0.4	0.09	0.79
84311	hSQ042915	|| MRPL45 || Mitochondrial ribosomal protein L45 || Hs.462913 || NM_032351 || || 84311 || hHR008075 || 1418419	-0.32	-0.17	-0.36	-1.03	-0.24	-0.44	0.99	1.01	0.9	0.93	0.66	0.27	0.59	0.32	0.675	0.59	0.78	0.12	0.31	0.26	-0.22	0.2
23403	hSQ020770	|| FBXO46 || F-box protein 46 || Hs.128702 || BC008046 || || 23403 || hHR014870 || 1418467	1.59	1.7	1.89	1.67	1.76	1.57	1.12	1.17	1.08	1.23	0.76	0.6	0.91	0.3	1.815	1.65	1.32	0.81	0.69	0.44	1.61	1.39
130865	hSQ014468	|| || || || XM_497840 || || || hHR027007 || 1418505	-1.94	-1.69	-0.68	-1.67	-0.84	-0.69	0.24	0.07	-0.54	0.3	-1.34	-0.75	-0.43	0.5	-1.925	-1.73	-2.78	-2.23	-0.04	-0.13	-2.47	-0.2
6389	hSQ037651	|| SDHA || Succinate dehydrogenase complex, subunit A, flavoprotein (Fp) || Hs.440475 || NM_004168 || || 6389 || hCM001133 || 1418537	0.24	0.09	-0.19	-0.27	-0.47	-0.82	0.21	0.12	-0.39	0.28	-0.27	-0.44	0.26	-0.64	-1.325	-1.21	-1.65	-0.95	0.42	0.48	0.06	0.61
9040	hSQ031613	|| UBE2M || Ubiquitin-conjugating enzyme E2M (UBC12 homolog, yeast) || Hs.406068 || NM_003969 || || 9040 || hHR026355 || 1418550	-0.25	-0.31	0.8	0.23	-0.58	-0.01	0.13	0.27	-0.64	-0.61	0.06	-0.99	0.52	-0.33	0.175	-0.01	-0.36	-0.5	0.05	-0.2	0.94	1.43
3295	hSQ003223	|| HSD17B4 || Hydroxysteroid (17-beta) dehydrogenase 4 || Hs.406861 || NM_000414 || || 3295 || hHR005948 || 1418576	-1.35	-1.14	-0.75	-1.03	-0.64	-0.61	-0.11	-1.59	-1.15	-0.8	-1.82	-0.97	-0.63	-0.29	-1.875	-2.15	-1.96	-1.96	-0.53	-0.77	-1.73	1.11
27166	hSQ034643	|| PRELID1 || PRELI domain containing 1 || Hs.279529 || NM_013237 || || 27166 || hHR030048 || 1418595	-0.29	-0.38	0.4	0.08	0.49	0.47	0.75	0.82	0.84	0.99	0.89	-0.06	0.38	0.47	0.045	0.31	-0.13	-0.63	-0.36	0.12	0.51	1.5
2683	hSQ021901	|| B4GALT1 || UDP-Gal:betaGlcNAc beta 1,4- galactosyltransferase, polypeptide 1 || Hs.651277 || NM_001497 || || 2683 || hHR007109 || 1418674	-0.32	-0.05	0.22	-0.39	0.24	0.39	-0.29	-0.37	-0.55	-0.02	-0.54	-0.4	0.4	-0.19	0.465	0.64	0.68	0.24	0.38	0.01	-0.09	0.15
222068	hSQ014060	|| TMED4 || Transmembrane emp24 protein transport domain containing 4 || Hs.632641 || NM_182547 || || 222068 || hHR015176 || 1418687	-0.57	-0.5	-0.3	-0.34	-0.47	-0.23	-0.44	-0.74	-0.69	-0.67	0.34	-0.2	0.02	0.56	0.925	0.9	1.49	1.13	0.79	0.82	1.41	0.38
27338	hSQ024815	|| UBE2S || Ubiquitin-conjugating enzyme E2S || Hs.396393 || NM_014501 || || 27338 || hHR031506 || 1418710	-1.1	-1.18	-0.75	-1.14	-0.64	-0.5	1.33	1.22	1.04	0.75	0.8	-0.72	0.29	0.51	1.555	1.63	1.22	0.43	0.05	0.19	1.15	1.07
6181	hSQ000627	|| RPLP2 || Ribosomal protein, large, P2 || Hs.437594 || NM_001004 || || 6181 || hHR028978 || 1418735	-0.49	-0.42	0.32	-0.42	-0.43	-0.4	1.12	0.84	0.67	0.81	-0.27	-0.6	0.33	0.1	0.485	0.45	0.1	-0.78	-0.36	-0.08	-0.27	1.67
11313	hSQ008475	|| LYPLA2 || Lysophospholipase II || Hs.533479 || NM_007260 || || 11313 || hHR030346 || 1418833	0.97	0.9	1.32	0.83	0.69	0.86	1.05	1.17	1.49	1.01	1.35	0.4	1.03	1.06	1.975	1.49	1.69	1.37	1.13	0.67	2.22	2.76
54927	hSQ033037	|| CHCHD3 || Coiled-coil-helix-coiled-coil-helix domain containing 3 || Hs.655010 || NM_017812 || || 54927 || hHR028614 || 1418852	0.77	0.89	0.35	-0.04	0.85	1.2	1.74	1.71	0.32	0.57	0.21	0.05	1.14	0.54	-0.815	-0.76	-1.24	-1.47	-0.24	-0.22	-0.89	-0.52
388143	hSQ035133	|| || || || XM_370879 || || || hHR029714 || 1418890	-1.22	-1.06	-1.04	-1.44	-0.9	-0.74	0.2	-2.38e-09	0.02	0.49	-1.1	-0.77	-0.49	0.27	-1.365	-1.21	-2.14	-1.75	-0.22	-0.05	-2.4	0.75
57455	hSQ015992	|| REXO1 || REX1, RNA exonuclease 1 homolog (S. cerevisiae) || Hs.192477 || NM_020695 || || 57455 || hHR024843 || 1418903	1.36	1.26	0.41	0.21	0.56	0.57	0.86	0.9	0.23	-0.1	0.48	-0.38	0.77	-1.29	1.755	1.5	1.38	0.18	0.62	0.02	1.57	1.72
23379	hSQ012691	|| KIAA0947 || KIAA0947 protein || Hs.449296 || CR749441 || || 23379 || hHR011174 || 1418924	1.01	1.19	-0.41	-0.54	0.24	0.13	-0.24	-0.19	-0.28	-0.14	-0.73	0.7	-0.26	0.05	-0.655	-0.86	-0.43	0.13	0.03	-0.02	-0.11	-0.91
205717	hSQ023356	|| KIAA2018 || KIAA2018 || Hs.632570 || BX537728 || || 205717 || hHR008980 || 1419031	-0.2	-0.29	-0.17	-0.44	-0.31	-0.36	-1.78	-1.41	-1.61	-1.6	-2.17	-1.06	-0.99	-2.07	-0.515	-0.87	-0.72	0.15	-0.83	-0.58	0.15	-1.06
3251	hSQ021317	|| HPRT1 || Hypoxanthine phosphoribosyltransferase 1 (Lesch-Nyhan syndrome) || Hs.412707 || NM_000194 || || 3251 || hCM001044 || 1419039	-2.11	-1.98	-1.01	-0.99	-0.86	-1.17	-0.35	-0.62	0.19	0.57	-1.28	-0.56	-0.73	-0.08	-0.305	-0.35	0.17	-0.32	0.49	0.55	-0.42	0.99
293	hSQ032431	|| SLC25A6 || Solute carrier family 25 (mitochondrial carrier; adenine nucleotide translocator), member 6 || Hs.350927 || NM_001636 || || 293 || hHR030535 || 1419045	-1.62	-1.65	-1	-1.53	-1.01	-0.69	0.55	0.5	0.01	-0.02	0.04	-1.21	0.02	0.08	-0.205	0.14	-0.64	-1.2	0.05	-0.39	0.4	-0.25
83940	hSQ036332	|| TATDN1 || TatD DNase domain containing 1 || Hs.170568 || NM_032026 || || 83940 || hHR029807 || 1419068	-2.28	-2.03	-1.05	-1.84	-1.53	-1.54	-0.46	-0.46	-0.02	0.25	-0.71	-0.54	-0.82	0.03	-0.255	0.12	-0.08	0.04	0.93	0.47	-0.31	1.22
94431	hSQ024218	|| || || || NM_145237 || || || hHR031802 || 1419085	-1.23	-0.9	-1.01	-0.94	-1.38	-1.39	-0.79	-0.91	-1.29	-1.16	-0.92	-1.06	-1.02	-4.25	0.525	0.54	0.7	0.72	0.51	0.53	0.71	-0.18
4495	hSQ020634	|| MT1G || Metallothionein 1G || Hs.433391 || NM_005950 || || 4495 || hHR027500 || 1419130	0.43	0.38	0.32	0.05	0.07	-0.08	1.91	1.83	1.76	1.42	0.79	0.03	0.81	0.39	1.835	1.91	0.56	0.25	0.13	0.22	0.32	0.9
91942	hSQ011604	|| NDUFA12L || NDUFA12-like || Hs.591757 || NM_174889 || || 91942 || hHR029407 || 1419192	-1.36	-1.13	-0.98	-1.55	-0.72	-0.65	1.43	1.36	-0.12	0.14	-0.81	-0.81	0.55	-0.04	-1.495	-1.4	-2.61	-2.74	-0.33	-0.75	-2.49	0.18
389905	hSQ032839	|| || || || XM_372272 || || || hHR032287 || 1419193	-0.19	-0.31	0.27	0.07	0.05	-0.27	0.67	0.5	0.64	0.12	1.03	0.12	-0.03	0.27	1.765	1.61	1.62	1.24	-0.07	0.15	1.23	0.91
310	hSQ027231	|| ANXA7 || annexin A7 || Hs.631827 || || || 310 || hCT001100 || 1419226	-0.16	-0.23	-0.85	-0.65	-0.22	-0.32	-0.04	-0.04	0.46	0.16	0.14	0.2	0.37	0.24	-0.005	-0.01	1.03	0.47	0.63	0.85	0.8	0.62
64682	hSQ019625	|| ANAPC1 || Anaphase promoting complex subunit 1 || Hs.436527 || NM_022662 || || 64682 || hHR028851 || 1419237	0.29	0.22	-0.84	-0.91	-0.16	-0.49	-0.86	-0.84	-0.66	-0.39	-0.66	-0.54	-0.28	-0.57	-0.335	-0.48	0.12	0.5	0.51	0.38	0.64	-0.29
55591	hSQ027923	|| VEZT || Vezatin, adherens junctions transmembrane protein || Hs.24135 || NM_017599 || || 55591 || hHR027120 || 1419253	-0.61	-0.52	-0.67	-1.16	-1.02	-0.95	-0.09	-0.01	0.23	0.3	-0.77	-0.75	0.2	-0.74	0.115	-0.09	0.2	0.19	0.85	0.59	-0.15	1.33
6206	hSQ012152	|| RPS12 || Ribosomal protein S12 || Hs.546289 || NM_001016 || || 6206 || hHR029994 || 1419272	-1.85	-1.75	-0.95	-1.85	-1.37	-1.23	0.42	0.29	0.3	0.51	-0.85	-1.27	-0.53	0.51	-0.335	-0.18	-1.01	-1.56	-0.2	-0.31	-1.6	0.82
51121	hSQ030426	|| RPL26L1 || Ribosomal protein L26-like 1 || Hs.546390 || NM_016093 || || 51121 || hHR015914 || 1419278	-0.18	0.01	-0.25	-0.25	0.63	0.47	1	1.07	0.57	0.95	0.44	0.61	0.31	0.9	-0.895	-0.78	-1.75	-1.25	-0.75	-0.48	-1.45	-0.1
4668	hSQ022022	|| NAGA || N-acetylgalactosaminidase, alpha- || Hs.75372 || NM_000262 || || 4668 || hHR009488 || 1419282	0.3	0.25	0.46	0.38	0.37	0.1	-0.12	0.28	0.11	0.27	-0.41	-0.53	0.2	-0.45	0.165	0.16	-0.3	-0.65	-0.13	-0.54	-0.14	1.25
128322	hSQ000910	|| || || || XM_060943 || || || hHR028304 || 1419290	-0.25	-0.48	0.17	0.19	0.07	0.52	0.17	-0.16	0.68	0.37	0.61	-0.01	-0.09	0.06	0.745	0.7	0.99	0.13	0.13	0.82	1.41	1.41
285984	hSQ042706	|| || similar to Heterogeneous nuclear ribonucleoprotein A1 (Helix-destabilizing protein) (Single-strand binding protein) (hnRNP core protein A1) (HDP-1) (Topoisomerase-inhibitor suppressed) || Hs.449380 || || || || hHR029479 || 1419366	-1.69	-1.4	-0.54	-1.36	-1.15	-0.89	-0.62	-0.72	-0.72	-0.39	-1.59	-1.51	-0.08	-0.95	-2.725	-2.67	-3.7	-3.16	-0.68	-0.89	-3.52	-0.7
79664	hSQ011561	|| NARG2 || NMDA receptor regulated 2 || Hs.657694 || NM_024611 || || 79664 || hHR015042 || 1419372	-0.09	0.04	-0.43	-0.81	-0.3	-0.59	-0.63	-0.51	0.45	0.45	-0.27	0.07	0.22	0.39	-0.545	-0.64	-1.05	-0.82	0.26	-0.21	-0.61	-0.1
9757	hSQ036446	|| MLL4 || Myeloid/lymphoid or mixed-lineage leukemia 4 || Hs.92236 || NM_014727 || || 9757 || hHR018448 || 1419401	2.2	2.06	0.98	0.44	1.01	1.1	1.57	1.53	-0.48	-0.65	0.21	-0.44	0.73	-1.95	2.345	2.07	1.56	0.59	1.15	-0.25	1.5	0.64
51495	hSQ026267	|| PTPLAD1 || Protein tyrosine phosphatase-like A domain containing 1 || Hs.512973 || NM_016395 || || 51495 || hHR006003 || 1419454	0.01	-0.08	-0.68	-0.13	0.46	0.19	-2.29	-2.64	-1.65	-1.81	-0.51	0.34	-0.55	0.57	-1.055	-0.92	0.31	0.37	2.24e-10	1.06	0.7	-0.96
83640	hSQ005594	|| FAM103A1 || Family with sequence similarity 103, member A1 || Hs.80624 || NM_031452 || || 83640 || hHR031008 || 1419521	-2.01	-1.75	-0.36	-0.99	-0.5	-0.11	-0.46	-0.78	-0.12	0.34	-0.87	-0.21	-0.71	0.1	-0.745	-0.35	-0.23	-0.12	0.35	0.57	-1	1.26
51510	hSQ022259	|| CHMP5 || Chromatin modifying protein 5 || Hs.635313 || NM_016410 || || 51510 || hHR017646 || 1419524	0.53	0.8	0.12	0.17	0.95	0.94	2.28	2.4	1.03	1.23	1.81	1.11	1.19	1.74	-1.035	-0.88	-0.7	-1.32	-0.26	0.07	-1.45	0.01
92002	hSQ022440	|| FAM58A || Family with sequence similarity 58, member A || Hs.496943 || NM_152274 || || 92002 || hHR028570 || 1419548	-1.63	-1.43	-0.79	-1.13	-0.38	-0.48	0.25	-0.31	-0.34	-0.13	-1.07	-1.09	-0.4	0.02	0.445	0.6	0.01	-1.03	-0.06	-0.32	-0.14	0.57
3251	hSQ021312	|| HPRT1 || Hypoxanthine phosphoribosyltransferase 1 (Lesch-Nyhan syndrome) || Hs.412707 || NM_000194 || || 3251 || hCM000969 || 1419567	-1.87	-1.72	-1.48	-1.69	-1.52	-1.34	0.41	0.35	0.64	0.98	-0.25	-0.57	-0.47	0.35	0.945	0.33	1.1	0.45	0.91	0.6	-0.25	0.13
10552	hSQ009260	|| ARPC1A || Actin related protein 2/3 complex, subunit 1A, 41kDa || Hs.124126 || NM_006409 || || 10552 || hHR029754 || 1419626	0.19	0.05	-0.26	-0.51	0.03	-0.6	0.53	0.88	0.86	1.22	-0.03	2.98e-09	0.74	-0.98	-0.405	-0.53	-0.27	-0.5	0.5	0.78	-0.6	2.13
388272	hSQ027245	|| LOC388272 || Similar to RIKEN cDNA 4921524J17 || Hs.586916 || NM_001001436 || || 388272 || hHR002674 || 1419642	-2.12	-1.73	-0.86	-0.8	-1.24	-0.84	-0.5	-0.53	-0.58	-0.44	-1.84	-0.75	-0.88	-2.84	-0.675	-0.66	-0.13	-0.24	0.57	0.61	-1.08	1.02
3189	hSQ032328	|| HNRPH3 || Heterogeneous nuclear ribonucleoprotein H3 (2H9) || Hs.643472 || NM_012207 || || 3189 || hHR006370 || 1419651	-2.74	-2.34	-1.53	-2.22	-2.13	-1.95	-2.25	-2.57	-1.84	-1.37	-3.08	-1.89	-1.05	-0.77	-1.635	-1.74	-2.42	-1.74	-0.11	-0.5	-1.82	0.14
382	hSQ012771	|| ARF6 || ADP-ribosylation factor 6 || Hs.525330 || NM_001663 || || 382 || hHR026688 || 1419673	-0.01	-0.01	1.24	0.92	0.5	0.96	-0.08	-0.23	0.54	0.84	0.13	0.06	0.36	-0.27	0.095	0.35	0.81	0.57	0.85	0.48	0.43	1.75
11021	hSQ032496	|| RAB35 || RAB35, member RAS oncogene family || Hs.524788 || NM_006861 || || 11021 || hHR006615 || 1419701	-0.38	-0.49	-0.62	-0.78	-0.45	-0.58	-0.37	-0.55	-1.42	-1.38	-0.25	-1.52	-0.93	-1.37	-1.665	-1.52	-2.61	-2.67	-1.32	-1.86	-1.33	-2.24
9538	hSQ042508	|| EI24 || Etoposide induced 2.4 mRNA || Hs.643514 || NM_004879 || || 9538 || hHR016596 || 1419723	-0.72	-0.72	-0.2	-0.9	-0.05	-0.06	-0.71	-1.31	-0.53	-0.26	-1.35	-0.26	-0.29	-0.04	-0.215	-0.24	-0.17	-0.48	-0.27	-0.22	-1.28	0.29
54431	hSQ035614	|| DNAJC10 || DnaJ (Hsp40) homolog, subfamily C, member 10 || Hs.516632 || NM_018981 || || 54431 || hHR003969 || 1419774	-0.83	-0.71	-1.29	-1.42	-0.87	-0.69	-0.89	-0.82	-0.61	-0.59	-1.23	-0.64	-0.56	-0.27	-0.985	-0.97	-1.03	-0.54	0.03	-0.08	-0.63	-0.87
158345	hSQ041800	|| || || || XM_034640 || || || hHR029855 || 1419819	0.77	1.16	0.56	-0.08	1.28	1.26	1.64	1.75	0.47	1.15	0.55	0.57	1.03	0.64	-1.545	-1.66	-2.17	-2.89	-1	-0.6	-2.77	-1.04
2122	hSQ009266	|| EVI1 || Ecotropic viral integration site 1 || Hs.656395 || NM_005241 || || 2122 || hHR012611 || 1419843	0.76	0.77	0.41	-0.05	0.86	0.51	-0.67	-0.14	-0.62	-0.67	-0.61	-0.21	0.28	-0.92	-1.255	-1.36	-1.48	-0.48	-0.86	-0.91	-0.77	-1.22
57616	hSQ016356	|| TSHZ3 || Teashirt family zinc finger 3 || Hs.278436 || NM_020856 || || 57616 || hHR010267 || 1419913	0.56	0.59	0.3	0.18	0.53	0.7	0.28	0.56	-0.15	0.05	-0.4	0.26	0.11	0.01	0.615	0.24	0.28	0.25	0.37	0.11	0.36	-0.36
9567	hSQ037603	|| GTPBP1 || GTP binding protein 1 || Hs.276925 || NM_004286 || || 9567 || hHR026359 || 1419996	2.65	2.33	1.06	0.33	0.87	0.72	-0.05	-0.14	-0.21	-0.25	0.14	-0.45	0.34	-0.43	1.045	0.81	0.42	0.14	0.47	-0.29	1.44	1.35
9584	hSQ030578	|| || || || NM_184244 || || || hHR028895 || 1419997	-1.24	-0.86	-0.4	-0.84	-0.58	-0.05	-0.72	-0.67	-1.49	-0.9	-2.47	-1.25	-0.7	-0.49	-0.815	-0.94	-1.65	-1.16	0.02	-0.05	-0.82	0.4
54962	hSQ040875	|| TIPIN || TIMELESS interacting protein || Hs.572318 || NM_017858 || || 54962 || hHR026451 || 1420032	-0.73	-0.59	-1.29	-1.44	-0.72	-1.01	0.77	0.85	0.21	0.62	-0.32	2.98e-09	0.07	0.12	-1.105	-0.89	-1.01	-0.76	-0.04	0.21	-1.22	-0.12
5796	hSQ015253	|| PTPRK || Protein tyrosine phosphatase, receptor type, K || Hs.155919 || NM_002844 || || 5796 || hHR009552 || 1420038	-0.72	-0.45	-1.09	-0.84	-0.54	-0.62	-0.86	-0.91	-0.45	-0.46	-0.92	-0.59	-0.4	-0.42	0.855	0.8	1.28	1.16	1.16	0.56	1.11	-0.7
10063	hSQ017198	|| COX17 || COX17 cytochrome c oxidase assembly homolog (S. cerevisiae) || Hs.534383 || NM_005694 || || 10063 || hHR030052 || 1420042	-0.53	-0.22	0.39	-0.51	0.06	0.48	2.57	2.08	1.57	1.7	0.76	0.4	1.29	1.1	-0.575	-0.7	-2.02	-1.91	-0.69	-0.77	-2.52	-0.89
6389	hSQ004311	|| SDHA || Succinate dehydrogenase complex, subunit A, flavoprotein (Fp) || Hs.440475 || NM_004168 || || 6389 || hCM000884 || 1420100	0.06	0.18	-0.39	-0.46	-0.72	-0.71	0.6	0.72	0.06	0.24	0.12	-0.79	0.47	-0.3	-0.775	-0.75	-0.82	-0.42	0.7	0.38	0.09	-0.21
23201	hSQ003284	|| KIAA0280 || KIAA0280 || Hs.475334 || D87470 || || 23201 || hHR003583 || 1420118	0.56	0.63	0.33	-0.31	-0.19	0.06	-0.16	0.28	-0.79	-0.62	-1.28	-1	-0.05	-1.57	-0.475	-0.74	-1.08	-0.85	-0.04	-0.66	-1.28	-0.25
54919	hSQ036356	|| HEATR2 || HEAT repeat containing 2 || Hs.535896 || NM_017802 || || 54919 || hHR031488 || 1420139	0.06	0.25	0.15	-0.66	0.28	0.18	-0.87	-0.67	-1.08	-0.5	-0.98	-0.65	-0.18	-0.62	-0.775	-0.5	-0.84	-0.52	0.13	-0.09	-0.79	0.83
84747	hSQ004591	|| MGC5139 || Hypothetical protein MGC5139 || Hs.127610 || AK057021 || || 84747 || hHR013828 || 1420141	0.19	-0.02	-0.7	-1.07	-0.51	-0.66	-0.26	-0.22	-0.57	-0.12	-0.36	-0.73	-0.03	-0.27	1.075	0.47	1.29	1.24	0.96	0.74	1.36	1.36
10467	hSQ042123	|| ZNHIT1 || Zinc finger, HIT type 1 || Hs.211079 || NM_006349 || || 10467 || hHR020508 || 1420145	-0.27	-0.36	0.5	-0.2	0.32	0.16	1.33	1.15	0.76	0.77	0.55	0.03	0.33	0.55	0.775	0.62	0.15	-0.36	-0.15	0.14	0.34	1.53
7534	hSQ021443	|| YWHAZ || Tyrosine 3-monooxygenase/tryptophan 5-monooxygenase activation protein, zeta polypeptide || Hs.492407 || NM_145690 || || 7534 || hCP000097 || 1420177	0.68	0.77	0.02	0.32	0.98	1.08	0.11	0.27	0.75	0.57	0.53	0.87	0.56	1.09	-0.235	-0.37	0.2	0.41	0.29	0.43	0.18	1.12
5281	hSQ031013	|| PIGF || Phosphatidylinositol glycan anchor biosynthesis, class F || Hs.468415 || NM_173074 || || 5281 || hHR023088 || 1420180	-0.32	-0.32	-0.44	-0.78	-0.41	-0.54	0.54	0.46	0.89	1.07	0.41	-0.45	-0.22	0.6	0.785	0.57	0.41	0.09	-0.19	-0.16	0.39	0.09
441912	hSQ037163	|| || || || XM_497720 || || || hHR017363 || 1420193	-1.73	-1.51	-0.87	-1	-0.19	0.12	0.42	0.1	0.37	0.89	-0.58	-0.82	-0.44	0.77	-0.405	-0.45	-0.76	-1.1	-0.45	-0.02	-0.64	0.36
440385	hSQ013211	|| || || || XM_496168 || || || hHR028432 || 1420221	-0.22	-0.17	-0.18	-0.43	-0.1	0.25	1.04	0.49	1.22	0.17	1.06	0.37	0.23	1.65	1.355	1.12	1.38	1.03	0.83	1.49	1.1	0.75
3251	hSQ025763	|| HPRT1 || Hypoxanthine phosphoribosyltransferase 1 (Lesch-Nyhan syndrome) || Hs.412707 || NM_000194 || || 3251 || hCM000939 || 1420270	-1.66	-1.82	-1.24	-1.31	-0.89	-1.09	-0.21	-0.07	0.34	0.95	-0.45	-0.47	-0.8	-0.19	-0.315	-0.21	0.33	0.18	0.46	0.6	-0.27	0.77
388954	hSQ040638	|| || || || XM_371495 || || || hHR028600 || 1420281	-0.38	-0.36	0.03	-0.19	-0.1	-0.15	0.92	1.01	1.1	1.47	0.67	0.4	0.18	0.78	1.385	1.16	0.91	0.84	0.66	1.09	1.35	1.52
55379	hSQ003490	|| LRRC59 || Leucine rich repeat containing 59 || Hs.370927 || NM_018509 || || 55379 || hHR020853 || 1420349	0.75	0.78	0.51	0.05	0.98	1.16	0.61	0.69	0.66	0.41	0.64	0.75	1.28	0.8	-0.195	-0.28	-0.2	0.35	0.39	-2.68e-09	0.23	0.57
8886	hSQ034966	|| DDX18 || DEAD (Asp-Glu-Ala-Asp) box polypeptide 18 || Hs.363492 || NM_006773 || || 8886 || hHR027393 || 1420387	0.38	0.32	-0.31	-0.37	0.35	0.56	0.21	-0.07	-1.14	-2	-0.32	0.07	0.08	-0.5	-0.865	-0.94	-0.76	-0.45	-0.17	-0.42	-0.58	0.02
6047	hSQ036208	|| RNF4 || Ring finger protein 4 || Hs.66394 || NM_002938 || || 6047 || hHR031044 || 1420397	0.33	0.55	0.77	0.16	0.72	0.89	0.05	0.14	1.07	1.1	0.59	0.23	0.77	0.82	1.485	1.45	1.76	1.88	1.59	1.51	1.43	2.03
343153	hSQ001367	|| || || || XM_291428 || || || hHR029226 || 1420404	-1.87	-1.58	-1.04	-1.92	-0.86	-0.71	0.39	0.22	-0.1	0.27	-0.67	-1.06	-0.39	0.8	-1.625	-1.51	-2.63	-2.37	-0.04	-0.03	-2.69	0.26
5230	hSQ012639	|| PGK1 || Phosphoglycerate kinase 1 || Hs.654578 || NM_000291 || || 5230 || hHR031155 || 1420426	0.39	0.31	0.34	0.06	0.54	0.46	0.86	0.58	0.89	1.22	0.87	0.61	0.41	0.47	0.055	-0.01	0.19	-0.07	-0.25	-0.28	-0.01	0.56
126003	hSQ039540	|| TRAPPC5 || Trafficking protein particle complex 5 || Hs.432413 || BC042161 || || 126003 || hHR008940 || 1420459	7.15e-09	-0.08	0.19	-0.14	0.44	0.35	1.03	1.09	1.04	0.69	1.73	0.34	0.26	1.63	1.755	1.48	1.01	0.62	-0.35	-0.17	1.49	0.32
201965	hSQ010546	|| RWDD4A || RWD domain containing 4A || Hs.133337 || NM_152682 || || 201965 || hHR030525 || 1420469	-1.84	-1.66	-0.91	-1.2	-0.84	-1.13	-0.92	-0.89	-0.33	-0.04	-1.48	-0.69	-0.85	-0.19	-0.945	-0.68	-1.55	-1.03	-0.3	-0.52	-0.7	0.54
6908	hSQ012540	|| TBP || TATA box binding protein || Hs.590872 || NM_003194 || || 6908 || hCM001047 || 1420476	0.19	0.38	0.09	0.07	0.31	0.25	0.49	0.61	0.53	0.98	0.13	0.09	0.13	-0.12	0.275	0.07	1.06	1.27	0.43	1.28	1.24	0.96
257054	hSQ028124	|| D2HGDH || D-2-hydroxyglutarate dehydrogenase || Hs.535639 || NM_152783 || || 728294 || hHR030629 || 1420512	-1.39	-1.37	-1.14	-1.61	-1.21	-1.23	-0.42	-0.42	-1.35	-1.52	-0.59	-2.3	-0.83	-1.52	-0.695	-0.24	-0.2	-1.76	-0.56	-1.59	0.38	-2.95
23786	hSQ004554	|| BCL2L13 || BCL2-like 13 (apoptosis facilitator) || Hs.631672 || NM_015367 || || 23786 || hHR011534 || 1420558	0.02	0.27	0.43	-0.02	0.24	0.21	-0.17	-0.16	0.09	0.05	-0.23	0.2	0.44	-0.72	0.155	-0.16	0.15	0.71	0.65	0.18	0.44	0.82
6667	hSQ044710	|| SP1 || Sp1 transcription factor || Hs.649191 || NM_138473 || || 6667 || hHR023950 || 1420595	-0.11	-0.06	0.1	-0.01	0.2	0.44	-1.26	-2.04	-0.97	-1.62	-0.45	-0.76	-0.39	-0.93	0.565	0.67	0.76	0.89	0.37	-2.68e-09	1.03	1.06
54543	hSQ012835	|| TOMM7 || Translocase of outer mitochondrial membrane 7 homolog (yeast) || Hs.112318 || NM_019059 || || 54543 || hHR029397 || 1420612	-0.22	-0.34	-0.11	-0.51	-0.23	0.03	1.57	1.4	1.79	1.66	1.14	0.14	0.17	1.25	1.355	1.27	0.56	0.26	0.22	0.38	0.37	0.77
5566	hSQ018855	|| PRKACA || Protein kinase, cAMP-dependent, catalytic, alpha || Hs.631630 || NM_002730 || || 5566 || hHR022538 || 1420644	4.81	4.3	3.59	2.81	3.2	3.16	3.66	4.09	3.05	2.24	2.44	2.25	1.68	0.83	1.755	1.57	1.3	0.73	0.48	0.89	1.13	2.69
157317	hSQ027395	|| || || || NR_001561 || || || hHR028856 || 1420669	-0.44	-0.52	-0.85	-0.96	0.13	-0.03	0.61	0.5	0.28	-0.56	0.45	0.23	0.65	0.7	-0.585	-0.25	0.22	-0.63	-0.4	0.1	-0.58	-0.87
26822	hSQ004954	|| || || || D88010 || || || hHR026399 || 1420700	-1.92	-1.67	-1.07	-1.07	-2.11	-1.23	-1.08	-0.93	-1.1	-0.58	-2.03	-2.14	-0.74	-2.19	-1.965	-2.43	-4.13	-3.33	-3.34	-3.58	-2.06	-2.64
440794	hSQ042378	|| || || || XM_496496 || || || hHR030003 || 1420710	0.22	0.24	0.76	0.51	0.43	0.63	0.92	0.89	0.93	0.4	1.33	0.22	-0.13	0.55	1.045	0.88	-0.8	0.16	-0.74	-0.74	0.84	0.31
64979	hSQ023473	|| MRPL36 || Mitochondrial ribosomal protein L36 || Hs.32196 || NM_032479 || || 64979 || hHR028313 || 1420727	-1.21	-1.18	-0.39	-0.74	-0.04	-0.09	-0.14	-0.4	0.24	0.44	-0.36	0.14	-0.5	0.78	0.755	0.5	-0.2	-0.46	0.54	0.82	-0.47	0.82
138428	hSQ022225	|| PTRH1 || Peptidyl-tRNA hydrolase 1 homolog (S. cerevisiae) || Hs.653265 || AK090922 || || 138428 || hHR021650 || 1420764	-0.91	-0.83	-0.4	-0.71	-0.17	-0.11	0.59	0.51	0.19	0.09	0.32	-0.5	-0.22	0.38	0.135	0.42	0.16	-0.3	-0.42	-0.37	1.19	-0.13
23350	hSQ030623	|| SR140 || U2-associated SR140 protein || Hs.596572 || AB002330 || || 23350 || hHR004847 || 1420769	-0.61	-0.47	-1.13	-1.14	-0.55	-0.38	-0.66	-0.44	-0.86	-0.58	-1.42	-0.79	-0.88	-0.18	-0.995	-1.28	-1.68	-1.27	-0.4	-1.05	-1.03	-0.76
6165	hSQ018925	|| RPL35A || Ribosomal protein L35a || Hs.529631 || NM_000996 || || 6165 || hHR027735 || 1420774	-0.19	0.02	0.67	0.01	0.45	0.72	0.82	0.4	1.08	1.43	0.07	0.5	0.01	1.05	0.365	0.45	0.18	-0.36	1.12	1.11	-0.68	2.16
6048	hSQ023766	|| RNF5 || Ring finger protein 5 || Hs.534342 || NM_006913 || || 6048 || hHR031438 || 1420817	-0.47	-0.46	0.7	0.21	0.02	0.08	0.22	0.17	0.65	0.71	0.27	-0.85	0.34	0.98	0.775	1	0.36	-0.13	0.42	-0.14	1.15	1.37
4285	hSQ029047	|| MIPEP || Mitochondrial intermediate peptidase || Hs.507498 || NM_005932 || || 4285 || hHR013710 || 1420820	0.18	0.51	0.59	0.34	0.46	0.66	-0.15	-0.23	0.01	0.37	-0.08	0.57	0.45	0.65	0.025	0.14	0.34	0.39	0.49	0.56	0.45	-0.06
89958	hSQ022558	|| C9orf140 || Chromosome 9 open reading frame 140 || Hs.19322 || NM_178448 || || 89958 || hHR029571 || 1420833	-0.37	-0.33	-0.47	-1.16	-0.76	-0.59	-0.16	-0.24	-0.45	-0.72	-0.56	-1.33	-0.17	-1.33	-0.795	-0.89	-0.64	-1.82	-0.62	-1.98	-1.11	-1.66
6389	hSQ018817	|| SDHA || Succinate dehydrogenase complex, subunit A, flavoprotein (Fp) || Hs.440475 || NM_004168 || || 6389 || hCM000909 || 1420952	0.08	0.16	-0.3	-0.44	-0.55	-0.71	0.61	0.42	-8.94e-10	0.24	0.25	-0.76	0.39	-0.27	-0.815	-0.74	-0.99	-0.56	0.71	0.52	0.21	0.54
80025	hSQ010303	|| PANK2 || Pantothenate kinase 2 (Hallervorden-Spatz syndrome) || Hs.516859 || NM_153638 || || 80025 || hHR005037 || 1420953	-1.31	-1.14	-0.75	-1.09	-1.01	-1.14	0.3	0.21	0.12	0.21	-0.64	-0.87	-0.17	-0.33	1.385	1.41	1.57	1.07	1.5	1.29	1.08	1.72
8824	hSQ039594	|| CES2 || Carboxylesterase 2 (intestine, liver) || Hs.282975 || NM_003869 || || 8824 || hHR001572 || 1420974	2.1	1.84	0.93	0.47	1.03	0.79	0.35	0.45	0.47	0.05	0.86	-0.15	0.31	0.06	0.805	0.74	0.56	0.04	-0.07	-0.08	0.84	0.47
442573	hSQ001729	|| || || || XM_499315 || || || hHR028667 || 1421013	-0.56	-0.3	0.68	0.87	0.5	0.37	0.27	-0.02	0.63	1.12	-0.03	0.06	-1.34e-09	0.93	0.205	0.43	-0.23	0.01	-0.25	0.36	0.09	0.91
390842	hSQ034748	|| || || || XM_497583 || || || hHR028000 || 1421028	-0.14	5.96e-09	0.55	-0.09	0.4	0.43	1.1	0.7	0.43	0.96	0.2	-0.21	-0.33	0.87	-0.385	-0.34	-1.24	-1.77	-0.71	-0.15	-0.89	0.79
58516	hSQ014736	|| FAM60A || Family with sequence similarity 60, member A || Hs.505154 || NM_021238 || || 58516 || hHR030487 || 1421030	-0.44	-0.44	-0.33	-0.33	-0.05	-0.16	0.23	0.14	0.54	0.42	0.02	0.09	0.1	0.63	0.915	0.74	0.95	0.9	0.73	0.62	0.69	1.61
10155	hSQ006886	|| TRIM28 || Tripartite motif-containing 28 || Hs.467408 || NM_005762 || || 10155 || hHR023643 || 1421125	1.47	1.25	1.23	0.35	0.45	0.64	1.61	1.46	1.07	0.96	1.07	-0.27	0.33	-0.36	1.705	1.62	1.42	0.83	0.4	0.13	2.02	2.71
23420	hSQ020338	|| NOMO1 || NODAL modulator 1 || Hs.583391 || NM_014287 || || 23420 || hHR020128 || 1421178	0.38	0.42	0.14	-0.3	0.39	0.57	-0.32	-0.39	-0.87	-0.55	-0.7	-0.31	0.25	-0.4	-0.375	-0.48	-0.9	-0.31	0.06	-0.12	-0.38	-0.06
339229	hSQ018484	|| LOC339229 || Hypothetical protein LOC339229 || Hs.655241 || AY007126 || || 339229 || hHR005599 || 1421221	-0.74	-0.63	0.03	-0.42	0.01	0.08	0.36	0.4	0.38	0.33	0.67	-0.89	0.38	0.82	0.765	0.95	0.16	-0.59	-0.39	-0.68	0.36	-0.67
5829	hSQ011339	|| PXN || Paxillin || Hs.446336 || NM_002859 || || 5829 || hHR009182 || 1421237	2	1.93	1.49	0.93	1.56	1.1	0.91	0.88	0.75	0.8	1.19	0.59	1.12	-0.03	0.365	0.19	0.18	0.32	-0.08	-0.21	0.41	1.67
54801	hSQ014419	|| FAM29A || Family with sequence similarity 29, member A || Hs.533468 || NM_017645 || || 54801 || hHR029844 || 1421240	0.97	1.02	0.22	-0.07	1.03	1.18	-0.87	-0.86	0.35	0.78	0.04	0.56	0.15	1.59	-1.155	-1.07	-1.18	-0.59	-0.66	-0.9	-0.73	-0.87
53615	hSQ010207	|| MBD3 || Methyl-CpG binding domain protein 3 || Hs.178728 || NM_003926 || || 53615 || hHR026224 || 1421243	0.35	0.23	0.6	-0.35	-0.9	-1.14	0.76	0.53	0.29	-0.1	0.73	-1.34	0.38	-1	1.195	0.98	0.42	-1.04	0.08	-0.97	0.84	-0.33
339692	hSQ017815	|| LOC440895 || Similar to LIM and senescent cell antigen-like domains 3 || Hs.372946 || AK023465 || || 440895 || hHR031858 || 1421264	-0.1	-0.16	0.54	-0.25	-0.09	0.03	0.51	0.16	0.42	0.07	0.18	-0.58	-0.06	-0.71	0.865	1.22	0.93	-0.11	-0.09	0.07	1.34	1.73
9410	hSQ009943	|| WDR57 || WD repeat domain 57 (U5 snRNP specific) || Hs.33962 || NM_004814 || || 9410 || hHR025252 || 1421289	1.04	0.77	0.9	0.57	0.43	0.62	1.88	2.06	1.89	2.16	1.83	0.58	0.86	0.19	1.365	1.28	1.8	1.26	0.8	0.66	1.47	2.01
57472	hSQ030878	|| CNOT6 || CCR4-NOT transcription complex, subunit 6 || Hs.654984 || NM_015455 || || 57472 || hHR006883 || 1421343	-1.54	-1.47	-1.45	-1.72	-1.19	-1.47	-1.38	-1	-0.89	-1.01	-1.71	-1.56	-0.5	-0.89	0.275	0.16	0.23	-0.11	0.47	0.21	-0.24	0.23
83692	hSQ038890	|| CD99L2 || CD99 molecule-like 2 || Hs.522805 || NM_031462 || || 83692 || hHR016866 || 1421368	-0.67	-0.54	-0.88	-1.17	-0.82	-0.39	-0.88	-0.62	-0.9	-0.84	-0.77	-1.23	-0.1	-1.06	-1.825	-1.7	-2.71	-2.75	-0.73	-1	-0.72	-0.66
389741	hSQ044785	|| || || || NM_203448 || || || hHR031394 || 1421386	-1.2	-1.34	-0.95	-1.19	-1.35	-1.38	-1.83	-1.59	-1.19	-1.3	-1.41	-1.51	-0.74	-1.87	-2.075	-2.1	-1.52	-1.19	-1.39	-1.81	-1.27	-3.32
7690	hSQ030942	|| ZNF131 || Zinc finger protein 131 || Hs.535804 || AK057343 || || 7690 || hHR027082 || 1421404	-0.82	-0.58	-0.42	-0.9	-0.61	-0.5	-0.71	-0.42	-1.28	-1.2	-2.24	-0.95	-0.32	-1.28	-1.155	-0.96	-1.6	-1.07	-0.28	-0.39	-1.08	-0.89
389655	hSQ006548	|| || || || XM_496975 || || || hHR026338 || 1421417	0.28	0.02	0.46	0.06	0.92	0.57	0.54	0.55	0.68	0.77	0.61	0.19	-0.02	0.7	0.725	0.62	-0.52	-0.39	-0.34	-0.01	-0.26	-0.26
388720	hSQ027870	|| LOC388720 || Similar to ubiquitin and ribosomal protein S27a precursor || Hs.449037 || XM_371330 || || 388720 || hHR030041 || 1421464	0.64	0.59	0.81	0.19	0.75	0.47	1.48	1.44	1.51	1.8	1.14	0.68	0.8	1.48	0.435	0.55	0.66	0.31	1.07	1.12	0.5	2.09
3251	hSQ037452	|| HPRT1 || Hypoxanthine phosphoribosyltransferase 1 (Lesch-Nyhan syndrome) || Hs.412707 || NM_000194 || || 3251 || hCM000816 || 1421490	-1.62	-1.59	-1.34	-1.37	-0.94	-1.03	0.01	0.18	0.88	1.19	-0.18	-0.49	-0.38	0.36	0.375	0.31	0.7	0.39	0.98	0.69	0.29	0.67
50848	hSQ008043	|| F11R || F11 receptor || Hs.517293 || NM_144503 || || 50848 || hHR010575 || 1421560	-0.48	-0.4	-0.43	-0.51	-0.52	-0.82	-0.38	-0.8	-0.25	-0.44	-0.19	-0.47	-0.14	-0.65	0.665	0.51	1.12	0.62	0.28	-0.05	0.32	0.76
1729	hSQ041183	|| DIAPH1 || Diaphanous homolog 1 (Drosophila) || Hs.529451 || NM_005219 || || 1729 || hHR015159 || 1421561	1.58	1.44	0.76	0.89	1.14	0.96	0.06	0.12	-0.66	-0.33	0.14	0.37	0.21	-0.37	-0.415	-0.81	-1.04	-0.41	-0.3	-0.26	0.01	0.02
65005	hSQ013372	|| MRPL9 || Mitochondrial ribosomal protein L9 || Hs.288936 || NM_031420 || || 65005 || hHR013786 || 1421576	-0.34	-0.4	-0.23	-0.71	0.19	-0.06	1.36	1.06	0.42	0.49	0.51	-0.76	0.66	0.41	-0.395	-0.15	-0.24	-0.93	-0.03	-0.09	0.19	0.35
54928	hSQ035169	|| IMPAD1 || Inositol monophosphatase domain containing 1 || Hs.591872 || NM_017813 || || 54928 || hHR007221 || 1421580	-0.79	-0.49	-0.46	-0.58	-0.34	-0.08	0.92	0.75	0.71	0.92	0.03	-0.29	0.19	0.59	0.345	0.23	0.2	0.04	0.24	-0.32	-0.1	0.49
170688	hSQ024094	|| NUDT4 || Nudix (nucleoside diphosphate linked moiety X)-type motif 4 || Hs.591008 || AK074343 || || 11163 || hHR029608 || 1421595	-1.49	-1.22	-0.65	-0.8	-0.65	-0.59	-1.11	-1.4	-0.77	-0.51	-1.14	-0.4	-0.68	-0.72	-0.545	-0.56	-0.69	-0.62	0.05	-0.4	-1.17	-0.76
310	hSQ019510	|| ANXA7 || annexin A7 || Hs.631827 || || || 310 || hCT001253 || 1421631	0.01	-0.3	-1.1	-0.74	-0.41	-0.56	-0.54	-0.58	0.05	-0.45	0.39	-0.01	0.31	0.11	-0.255	-0.3	0.94	0.63	0.58	0.8	0.89	0.24
8321	hSQ011247	|| FZD1 || Frizzled homolog 1 (Drosophila) || Hs.94234 || NM_003505 || || 8321 || hHR002558 || 1421643	-0.73	-0.61	-0.82	-0.87	-0.56	-0.28	-0.81	-0.9	-0.61	-0.26	-0.97	-0.38	-0.08	-1.05	-0.745	-0.84	-0.5	0.07	0.22	-0.22	0.2	0.5
304	hSQ001833	|| ANXA2P2 || Annexin A2 pseudogene 2 || Hs.534301 || M62898 || || 304 || hHR028421 || 1421670	1.29	1.22	0.07	0.15	0.81	0.5	2.65	2.89	2	1.88	2.23	1.5	1.69	1.19	0.855	0.86	1.16	0.47	0.56	0.72	-0.09	0.35
6389	hSQ021427	|| SDHA || Succinate dehydrogenase complex, subunit A, flavoprotein (Fp) || Hs.440475 || NM_004168 || || 6389 || hCM000932 || 1421726	0.2	0.21	-0.13	-0.38	-0.43	-0.76	0.43	0.54	0.05	0.06	0.01	-0.82	0.37	-0.3	-0.965	-0.85	-1.13	-0.67	0.56	0.47	0.15	0.54
5387	hSQ041480	|| PMS2L3 || Postmeiotic segregation increased 2-like 3 || Hs.659871 || NM_001003686 || || 5387 || hHR028606 || 1421744	0.47	0.51	0.55	0.44	0.63	0.32	1.15	1.05	1.15	1.2	0.58	0.03	0.2	-0.31	0.125	0.3	0.28	-0.02	0.34	0.58	0.82	0.64
440525	hSQ043009	|| || || || XM_498717 || || || hHR030434 || 1421760	2.05	2.02	1.59	0.54	1.92	1.98	3	2.67	1.93	2.55	1.79	1.48	1.95	2.16	1.525	1.3	0.61	0.7	0.41	0.32	0.39	1.08
10217	hSQ028184	|| CTDSPL || CTD (carboxy-terminal domain, RNA polymerase II, polypeptide A) small phosphatase-like || Hs.475963 || NM_005808 || || 10217 || hHR012180 || 1421763	-0.1	0.03	0.37	-0.04	0.4	0.5	0.06	0.17	0.38	0.3	-0.14	-0.06	0.44	0.07	0.375	0.28	0.4	0.58	0.13	0.29	0.51	0.42
4968	hSQ031084	|| OGG1 || 8-oxoguanine DNA glycosylase || Hs.380271 || NM_016819 || || 4968 || hHR017880 || 1421895	1.84	1.95	1.3	1.11	2.12	2.16	2.15	1.99	1.34	1.44	1.97	1.3	1.92	2	1.325	1.2	1.45	1.09	0.68	0.27	1.43	0.46
26797	hSQ043826	|| || || || X96651 || || || hHR016680 || 1421916	-1.21	-0.94	-1.08	-1.12	-1.06	-0.89	-1.04	-1.05	-0.47	-0.83	-1.08	-1.24	-0.6	-0.95	-0.025	0.08	-0.19	-0.44	-0.74	-0.07	0.34	-0.42
440921	hSQ002666	|| || || || XM_371577 || || || hHR030528 || 1421945	-0.97	-0.8	-0.12	-0.39	-0.21	-0.26	0.14	-0.18	0.51	0.7	0.2	0.1	0.02	0.6	0.735	0.95	0.91	0.68	0.82	0.93	0.55	1.66
3326	hSQ044799	|| HSP90AB1 || Heat shock protein 90kDa alpha (cytosolic), class B member 1 || Hs.509736 || NM_007355 || || 3326 || hHR028787 || 1421960	0.31	0.72	1.32	0.55	1.22	1.52	0.09	0.1	-0.95	-0.17	-1.32	-0.23	0.66	-0.19	-1.265	-1.65	-1.86	-1.89	-0.52	-0.51	-1.82	-0.42
6837	hSQ014309	|| SURF5 || Surfeit 5 || Hs.78354 || NM_181491 || || 6837 || hHR030618 || 1421971	0.17	0.35	0.48	0.33	0.15	0.15	-0.1	-0.11	-0.38	-0.46	0.17	-1.04	-0.04	-1.12	0.025	-0.2	0.15	-0.82	0.08	-0.68	0.52	-0.37
51552	hSQ039232	|| RAB14 || RAB14, member RAS oncogene family || Hs.371563 || NM_016322 || || 51552 || hHR023715 || 1422029	-0.06	0.11	0.21	0.03	0.12	0.35	-0.94	-1.53	-0.53	-0.6	-0.86	-0.06	0.1	-0.33	-0.645	-0.79	0.04	0.93	0.18	0.23	0.33	0.49
158293	hSQ036058	|| FAM120AOS || Family with sequence similarity 120A opposite strand || Hs.350364 || NM_198841 || || 158293 || hHR006670 || 1422034	-0.64	-0.45	0.05	-0.29	-0.08	0.09	0.11	-0.07	0.56	0.62	-0.25	-0.27	0.36	0.29	0.365	0.36	0.68	0.19	0.39	0.02	0.28	0.37
55747	hSQ003306	|| FAM21B || Family with sequence similarity 21, member B || Hs.449662 || AK125147 || || 55747 || hHR031248 || 1422075	0.28	0.53	-0.59	-0.33	0.11	0.73	0.09	0.31	-0.01	0.02	-0.16	-0.3	0.39	-0.35	-1.105	-1.06	-1.08	-0.88	0.02	-0.27	-0.56	0.24
11158	hSQ042485	|| RABL2B || RAB, member of RAS oncogene family-like 2B || Hs.584862 || NM_007081 || || 11158 || hHR030716 || 1422168	1.24	1.33	2.28	1.47	1.65	2.23	1.62	1.5	1.17	1.4	1.02	0.45	1.4	0.93	0.565	0.4	0.38	0.13	0.03	-0.08	0.17	1.34
57683	hSQ018653	|| ZDBF2 || Zinc finger, DBF-type containing 2 || Hs.110489 || AB046791 || || 57683 || hHR003438 || 1422272	-0.19	0.01	-0.5	-0.45	-0.84	-0.67	-1.02	-2.11	-0.02	-0.11	-1.75	-0.6	-1.39	-1	-0.185	-0.36	-1	-0.72	0.22	-0.21	-0.52	-1.49e-09
23608	hSQ034426	|| MKRN1 || Makorin, ring finger protein, 1 || Hs.490347 || NM_013446 || || 23608 || hHR029471 || 1422276	-0.06	-0.02	0.53	0.57	0.4	0.45	-0.16	0.17	0.23	0.21	-0.71	-0.28	0.15	-0.35	-0.025	-0.05	0.03	0.08	0.75	0.69	0.7	1.93
1207	hSQ023792	|| CLNS1A || Chloride channel, nucleotide-sensitive, 1A || Hs.430733 || NM_001293 || || 1207 || hHR027278 || 1422389	1.96	1.58	0.52	0.8	0.9	1.82	-1.85	-2.55	-3.25	-4.19	2.4	0.87	1.69	0.91	-0.965	-0.29	0.09	-0.25	-0.54	0.25	0.02	-2.47
3145	hSQ025030	|| HMBS || Hydroxymethylbilane synthase || Hs.82609 || NM_000190 || || 3145 || hCM000902 || 1422442	0.23	-0.17	-0.09	-0.07	0.02	-0.22	0.69	0.7	0.75	0.77	0.89	-0.36	-0.25	0.41	0.675	0.24	0.73	0.48	-0.13	0.12	1.12	0.29
830	hSQ024639	|| CAPZA2 || Capping protein (actin filament) muscle Z-line, alpha 2 || Hs.446123 || NM_006136 || || 830 || hHR007313 || 1422484	-0.54	-0.65	-0.61	-0.83	-0.66	-0.61	1.19	1.36	1.23	1.29	0.67	-0.06	-0.21	0.23	0.905	0.67	1.39	0.99	0.77	0.36	0.86	0.86
4502	hSQ016572	|| MT2A || Metallothionein 2A || Hs.647371 || NM_005953 || || 4502 || hHR028655 || 1422496	0.34	0.43	0.73	-0.05	0.21	0.27	1.27	1.39	1.54	1.61	0.84	-0.03	0.68	0.65	1.625	1.76	-0.03	-6.71e-10	0.21	0.04	0.36	1.17
26781	hSQ020004	|| SNORA67 || Small nucleolar RNA, H/ACA box 67 || Hs.684858 || Y11161 || || 26781 || hHR029646 || 1422506	-1.06	-1.29	-0.02	-0.62	-0.27	-0.2	-0.1	-0.36	-0.64	-0.64	-0.62	-1.56	-0.97	-0.71	0.485	-0.04	-0.89	-1.5	-0.4	0.1	0.74	0.16
441408	hSQ001262	|| || || Hs.535063 || || || || hHR031621 || 1422522	0.04	0.12	0.32	0.06	0.65	0.54	1.98	1.91	1.29	1.33	1.34	0.44	0.71	0.96	0.625	0.4	-0.17	-0.3	-0.75	-0.55	-0.83	-0.88
4077	hSQ025297	|| NBR1 || Neighbor of BRCA1 gene 1 || Hs.546264 || NM_031858 || || 4077 || hHR030492 || 1422527	-0.52	-0.19	-0.57	-0.99	-0.08	0.09	-0.66	-1.19	-1.68	-1.56	-1.33	-0.84	-1.34e-09	-0.99	-2.205	-1.97	-2.13	-1.87	-0.41	-0.81	-2.19	-0.72
9425	hSQ021678	|| CDYL || Chromodomain protein, Y-like || Hs.269092 || NM_170751 || || 9425 || hHR025063 || 1422593	1.15	1.29	-0.22	0.61	0.54	0.98	-0.39	-0.59	-0.83	-1.96	0.39	0.33	0.31	0.39	-1.475	-1.24	-0.88	-6.71e-10	2.24e-10	-0.13	0.04	-1.03
344471	hSQ031046	|| || || || XM_497899 || || || hHR026890 || 1422667	0.25	0.07	-0.36	-0.62	-0.22	-0.38	0.8	0.8	1.34	0.31	1.32	0.22	-0.09	0.77	0.495	0.34	0.63	-0.02	0.08	0.11	0.13	-0.22
7803	hSQ012187	|| PTP4A1 || Protein tyrosine phosphatase type IVA, member 1 || Hs.227777 || NM_003463 || || 7803 || hHR007665 || 1422715	-1.27	-1.05	-0.92	-1.1	-1.12	-1.29	-1.68	-1.31	-0.59	-0.51	-1.25	-0.62	-0.43	-0.33	-0.745	-1.01	-0.97	-0.64	-0.19	-0.3	-0.65	0.4
440673	hSQ039929	|| NBPF1 || Neuroblastoma breakpoint family, member 1 || Hs.515947 || AF419616 || || 55672 || hHR030655 || 1422749	-0.51	-0.39	-0.7	-1.04	-0.81	-0.59	-0.77	-0.63	-0.76	-0.86	-1.45	-1.54	-0.56	-1.13	0.525	0.34	0.3	0.12	0.42	-0.05	0.34	-0.01
10140	hSQ024648	|| TOB1 || Transducer of ERBB2, 1 || Hs.653129 || NM_005749 || || 10140 || hHR002999 || 1422781	-0.78	-0.4	-0.15	-0.4	-0.07	0.18	-0.88	-0.43	-0.07	0.18	-0.89	-0.43	0.16	0.33	0.435	0.17	0.2	0.32	0.63	0.3	-0.33	-0.35
6432	hSQ021902	|| || || || NM_006276 || || || hHR003177 || 1422831	-1.22	-0.73	-0.82	-0.99	-0.63	-0.27	0.86	0.15	0.09	0.54	-0.38	-0.15	-0.13	0.46	0.245	0.21	0.54	-0.07	-0.1	-0.13	-0.42	-0.33
29071	hSQ023958	|| || || || NM_014158 || || || hHR008259 || 1422832	-1.27	-1.27	-1.33	-1.66	-1.39	-1.24	0.52	0.31	0.53	0.7	0.11	-0.15	0.12	0.36	-0.515	-0.61	-0.53	-0.61	-0.08	-0.12	-0.86	-0.39
57245	hSQ033662	|| ZDHHC3 || Zinc finger, DHHC-type containing 3 || Hs.61430 || AK127837 || || 51304 || hHR016806 || 1422869	-0.11	0.01	-0.27	-0.45	-0.01	-0.11	-0.2	-0.16	-0.32	-0.55	-0.37	-0.83	0.02	-0.57	0.015	0.06	-0.63	-0.09	-0.26	-0.67	0.09	-1.46
149832	hSQ024988	|| LOC149832 || Hypothetical protein LOC149832 || Hs.592705 || AK123831 || || 149832 || hHR002004 || 1422880	-2.2	-2.09	-1.16	-1.67	-1.59	-1.78	-3.56	-2.87	-2.88	-3.16	-3.55	-1.83	-1.62	-3.36	-1.055	-1.25	-1.03	-0.91	-0.43	-0.47	-0.27	-0.51
390345	hSQ004801	|| || || || XM_372471 || || || hHR028876 || 1422916	-0.16	-0.23	-0.42	-0.33	-0.5	-0.65	-0.04	-0.18	-0.09	0.22	-0.28	-1.42	0.3	-1.14	-0.185	-0.32	-0.78	-1.24	-1.67	-0.72	-0.04	-0.52
1291	hSQ012892	|| COL6A1 || Collagen, type VI, alpha 1 || Hs.474053 || NM_001848 || || 1291 || hHR016040 || 1422963	1.71	1.44	0.39	0.13	0.18	0.32	0.85	0.71	-0.6	-0.68	-0.63	-1.15	0.81	-0.63	0.455	0.23	-0.59	-0.83	-0.19	-1.12	-0.24	0.01
26256	hSQ021635	|| CABYR || Calcium binding tyrosine-(Y)-phosphorylation regulated (fibrousheathin 2) || Hs.511983 || NM_012189 || || 26256 || hHR019492 || 1422985	1.62	1.49	0.46	0.24	0.91	0.76	2.08	2.11	1.48	1.53	1.42	0.88	1.26	-0.22	0.895	0.9	1.25	0.84	0.9	1.02	0.33	1.25
203076	hSQ028322	|| C8orf74 || Chromosome 8 open reading frame 74 || Hs.371776 || BC065837 || || 203076 || hHR019666 || 1423024	3.34	3.19	1.79	1.26	2.19	2.33	0.61	0.82	1.04	0.95	1.11	0.82	0.9	0.31	1.325	1.44	0.69	0.48	0.14	0.3	1.35	2.2
55629	hSQ026649	|| PNRC2 || Proline-rich nuclear receptor coactivator 2 || Hs.512636 || NM_017761 || || 55629 || hHR030244 || 1423041	-1.95	-1.81	-0.98	-1.81	-1.51	-1	-1.25	-1.66	-0.93	-0.45	-1.99	-1.2	-0.7	-0.51	-0.525	-0.76	-0.05	-0.55	0.63	0.05	-1.1	-0.07
9202	hSQ042605	|| ZMYM4 || Zinc finger, MYM-type 4 || Hs.269211 || NM_005095 || || 9202 || hHR027228 || 1423131	0.84	1.09	0.26	0.09	0.62	0.67	-0.92	-0.94	-0.54	-1.22	-0.95	-0.04	0.1	-0.66	-0.195	-0.1	-0.09	0.47	0.63	0.46	-0.01	0.4
55052	hSQ039292	|| MRPL20 || Mitochondrial ribosomal protein L20 || Hs.182698 || NM_017971 || || 55052 || hHR029052 || 1423152	-0.18	-0.13	-0.45	-0.83	0.04	-0.21	1.29	1.15	0.96	1.16	0.65	0.1	0.41	0.66	1.005	0.95	0.74	0.45	0.1	0.68	0.34	1.31
10635	hSQ043099	|| RAD51AP1 || RAD51 associated protein 1 || Hs.591046 || NM_006479 || || 10635 || hHR005105 || 1423222	-1.58	-1.39	-1.29	-1.87	-1.23	-0.89	0.16	-0.09	-0.07	0.13	-0.92	-0.71	-0.45	0.31	0.275	0.12	-0.13	-0.1	0.86	0.58	-0.59	0.36
547	hSQ041915	|| KIF1A || Kinesin family member 1A || Hs.516802 || NM_004321 || || 547 || hHR001607 || 1423238	0.76	0.64	0.36	-0.38	-0.37	-1.15	-1.33	-1	-1.3	-1.71	-1.44	-1.56	-0.93	-2.58	1.035	0.75	0.23	-0.64	-0.13	-1.08	0.56	-1.55
54930	hSQ010060	|| C14orf94 || Chromosome 14 open reading frame 94 || Hs.442782 || NM_017815 || || 54930 || hHR019976 || 1423257	0.54	0.46	0.69	0.15	-0.43	-0.23	1.37	1.38	1.39	1.52	0.82	-0.18	0.52	0.58	0.655	0.58	0.51	0.42	0.13	0.08	0.55	-0.17
90416	hSQ037921	|| CCDC32 || Coiled-coil domain containing 32 || Hs.654661 || NM_052849 || || 90416 || hHR012152 || 1423263	-0.48	-0.42	0.06	-0.15	0.09	-0.13	0.46	0.65	0.78	0.76	0.21	-0.05	0.48	0.34	0.845	0.99	0.73	-0.11	0.17	0.32	0.83	1.01
10456	hSQ033589	|| HAX1 || HCLS1 associated protein X-1 || Hs.199625 || NM_006118 || || 10456 || hHR026034 || 1423279	1.51	1.29	0.59	0.75	0.86	1.41	0.95	0.63	0.35	-2.54	2.68	1.39	1.45	1.85	1.215	1.06	0.92	0.41	-0.17	0.71	1.44	-0.2
441301	hSQ015644	|| || || || || || || hHR018824 || 1423303	0.71	0.59	0.07	-0.02	0.12	0.04	1.45	1.2	1.65	1.6	1.14	-0.07	0.79	0.46	0.565	0.75	-0.22	-0.51	-1.07	-1.56	-0.44	-0.73
1355	hSQ000252	|| COX15 || COX15 homolog, cytochrome c oxidase assembly protein (yeast) || Hs.591916 || NM_078470 || || 1355 || hHR005484 || 1423441	-0.26	-0.12	-0.94	-0.67	-0.4	-0.59	-1.86	-1.94	-0.64	-1.44	-0.42	-0.43	-0.28	-8.94e-10	-0.655	-0.84	0.03	0.45	0.35	0.46	0.29	0.39
150472	hSQ000095	|| CBWD1 || COBW domain containing 1 || Hs.531330 || NM_172003 || || 55871 || hHR030518 || 1423445	-1.62	-1.36	-1.29	-1.53	-0.75	-0.92	-0.69	-0.72	-0.86	-0.22	-1.61	-0.88	-1.13	-0.07	-1.025	-1.06	-1.06	-0.12	0.35	0.44	-0.68	0.61
8270	hSQ018605	|| LAGE3 || L antigen family, member 3 || Hs.444619 || NM_006014 || || 8270 || hHR026150 || 1423458	-0.06	-0.32	-0.03	0.28	-0.17	0.15	0.96	0.63	0.98	-0.62	1.46	0.04	-0.16	0.81	0.905	0.78	0.82	0.08	-0.6	-0.35	1	-0.28
5833	hSQ021468	|| PCYT2 || Phosphate cytidylyltransferase 2, ethanolamine || Hs.645248 || NM_002861 || || 5833 || hHR031908 || 1423513	-0.28	-0.22	-0.09	-0.42	-0.02	0.04	0.65	0.57	0.55	0.05	0.87	-0.48	0.03	0.34	0.345	0.82	0.74	0.05	-0.41	-0.65	1.14	0.5
10286	hSQ010936	|| BCAS2 || Breast carcinoma amplified sequence 2 || Hs.22960 || NM_005872 || || 10286 || hHR024155 || 1423594	-1.29	-1.19	-1.44	-1.41	-0.75	-0.76	0.51	-0.08	0.11	0.51	-0.38	-0.22	0.23	0.2	-0.735	-0.78	0.04	-0.12	0.88	0.71	-0.57	1.74
900	hSQ022998	|| CCNG1 || Cyclin G1 || Hs.79101 || NM_004060 || || 900 || hHR006964 || 1423599	-0.69	-0.52	-1.1	-1.38	-0.58	-0.72	-0.1	-0.16	0.56	0.75	0.23	0.14	-0.2	0.9	0.185	0.22	0.8	0.2	0.74	0.81	0.22	0.86
57876	hSQ022834	|| MUC3B || Mucin 3B, cell surface associated || Hs.489354 || AB038783 || || 57876 || hHR019358 || 1423700	3.62	3.9	3.14	2.27	3.45	3.3	4.29	4.13	3.14	3.23	3.31	2.39	3.77	1.4	2.215	1.96	1.55	1.31	0.11	0.07	0.72	0.73
51021	hSQ031449	|| MRPS16 || Mitochondrial ribosomal protein S16 || Hs.180312 || NM_016065 || || 51021 || hHR021394 || 1423702	-0.77	-0.47	0.18	-0.12	0.22	0.42	0.44	0.42	1.03	0.99	0.37	0.4	0.23	1.01	1.105	1.02	0.59	0.14	0.1	0.48	0.76	0.57
84908	hSQ034573	|| FLJ14668 || Hypothetical protein FLJ14668 || Hs.651151 || NM_032822 || || 84908 || hHR027727 || 1423739	-1.51	-1.4	-0.78	-1.11	-0.62	-0.62	-0.91	-0.83	-0.71	-0.08	-1.64	-0.77	-0.22	-0.07	-1.765	-1.38	-1.28	-1.2	-0.23	-0.22	-1.13	0.13
2497	hSQ016044	|| || || || AL096776 || || || hHR030285 || 1423775	0.04	0.17	0.51	-0.19	0.01	0.32	0.72	0.35	0.23	0.61	-0.12	-0.34	0.77	0.59	0.175	0.27	0.3	-0.15	0.28	0.43	-3.58e-09	0.71
51754	hSQ045536	|| C9orf127 || Chromosome 9 open reading frame 127 || Hs.493808 || NM_016446 || || 51754 || hHR018369 || 1423790	4.84	5.25	4.44	4.01	5.18	5.05	4.33	4.01	3.7	3.71	4.27	4.31	4.23	4.15	1.895	1.93	1.87	1.43	0.49	0.13	0.82	0.55
11337	hSQ008419	|| GABARAP || GABA(A) receptor-associated protein || Hs.647421 || NM_007278 || || 11337 || hHR027191 || 1423834	0.75	0.44	0.3	0.23	0.5	0.72	1.19	1.08	1.5	-0.1	1.46	0.58	0.83	1.22	1.955	1.69	1.17	1.11	2.24e-10	0.97	1.53	0.66
55230	hSQ018754	|| USP40 || Ubiquitin specific peptidase 40 || Hs.96513 || NM_018218 || || 55230 || hHR004976 || 1423921	0.02	0.05	-0.2	-0.29	-0.41	-0.68	-1.89	-2.46	-2.01	-2.32	-1.8	-1.18	-1.25	-3.36	-2.335	-2.71	-2.77	-1.67	-1.46	-1.59	-1.37	-1.83
400571	hSQ002589	|| || || || XM_378646 || || || hHR019724 || 1423924	1.73	1.65	0.16	-0.16	0.23	-0.32	0.47	0.12	0.32	-0.18	0.65	-0.77	-0.19	-8.94e-10	-0.525	-0.11	-1.14	-1.95	-1.23	-2.71	-0.34	-1.11
390992	hSQ014763	|| || || || XM_372757 || || || hHR025809 || 1423937	4.04	3.81	1.63	1.41	1.83	1.8	0.3	0.02	0.21	-0.52	1.26	0.68	0.18	-0.22	0.255	0.62	0.36	-0.26	-0.26	-1.27	0.97	0.27
3226	hSQ032970	|| HOXC10 || Homeobox C10 || Hs.44276 || NM_017409 || || 3226 || hHR008649 || 1423941	1.27	1.34	0.85	0.55	1.25	1.57	1.65	1.54	0.87	1.06	0.34	0.22	1.29	0.5	0.605	0.65	0.72	0.37	0.64	0.3	-0.12	1.63
84844	hSQ019229	|| PHF5A || PHD finger protein 5A || Hs.474980 || NM_032758 || || 84844 || hHR027912 || 1423965	-1.24	-1.03	-0.29	-0.53	-0.18	0.1	0.24	0.02	0.44	0.35	0.23	-0.42	-0.14	0.41	0.885	0.7	0.39	-0.36	0.18	0.3	0.03	1.15
57680	hSQ027722	|| CHD8 || Chromodomain helicase DNA binding protein 8 || Hs.530698 || AB046784 || || 57680 || hHR011006 || 1424018	-0.43	-0.5	-0.88	-1.63	-0.88	-1.13	-1.28	-1.34	-2.37	-2.26	-1.87	-1.76	-1.12	-1.93	-1.935	-1.77	-2.6	-2.49	-1.15	-1.32	-1.13	-0.81
2760	hSQ031188	|| GM2A || GM2 ganglioside activator || Hs.483873 || NM_000405 || || 2760 || hHR020978 || 1424048	0.73	0.89	0.81	0.49	0.61	0.57	0.36	0.45	0.5	0.98	0.25	0.02	0.49	-0.11	0.245	0.37	0.49	0.24	-0.52	-0.27	0.21	0.93
378	hSQ038872	|| ARF4 || ADP-ribosylation factor 4 || Hs.652183 || NM_001660 || || 378 || hHR011243 || 1424049	-0.04	0.07	0.51	7.15e-09	0.56	0.67	0.7	0.76	1.38	1.64	0.63	0.28	0.49	1.19	1.505	1.38	1.48	1.24	0.87	0.93	0.89	0.62
442442	hSQ043345	|| || || || || || || hHR025034 || 1424063	0.33	0.37	-0.67	-0.5	0.38	0.1	1.64	1.53	0.75	0.75	0.73	0.53	0.78	0.19	-1.235	-1.09	-2.01	-1.67	-0.77	-0.23	-1.89	-0.37
442060	hSQ044899	|| || || || XM_497892 || || || hHR026662 || 1424070	0.93	1	0.4	0.22	0.84	0.82	2.12	1.98	1.53	1.68	1.7	1.02	1.27	1.17	-0.755	-1.03	-0.54	-1.51	-0.72	-0.18	-1.14	-0.32
387778	hSQ014624	|| SPDYC || Speedy homolog C (Drosophila) || Hs.450642 || NM_001008778 || || 387778 || hHR022195 || 1424134	4.72	4.54	2.23	1.47	4.24	4.32	2.85	2.7	2.16	2.01	3.97	3.26	2.51	3.46	3.025	2.71	2.06	2.33	1.16	1.81	2.32	1.26
440392	hSQ001469	|| || || || XM_498651 || || || hHR003943 || 1424168	-2.41	-2.33	-2.11	-1.84	-2.38	-2.37	-0.38	-0.36	-0.37	0.01	-0.67	-1.83	0.15	-1	-1.075	-0.83	-1.51	-2.14	-1.68	-2.32	-1.33	-1.71
65263	hSQ029049	|| PYCRL || Pyrroline-5-carboxylate reductase-like || Hs.165186 || NM_023078 || || 65263 || hHR020239 || 1424176	0.65	0.5	1.17	0.51	0.92	1	0.56	0.7	0.41	0.39	0.83	-0.22	-0.08	-0.11	0.765	0.87	0.49	-0.51	-0.22	-0.39	1.17	1.61
147727	hSQ043988	|| LOC147727 || Hypothetical protein LOC147727 || Hs.631616 || AL832185 || || 147727 || hHR004138 || 1424205	-1.49	-1.66	-1.21	-1.67	-1.01	-0.95	-2.03	-2.37	-1.79	-2.93	-0.7	-1.28	-0.72	-0.89	-1.615	-1.73	-2.8	-2.23	-2.53	-1.92	-1.19	-3.52
55651	hSQ004691	|| NOLA2 || Nucleolar protein family A, member 2 (H/ACA small nucleolar RNPs) || Hs.27222 || NM_017838 || || 55651 || hHR025234 || 1424260	-0.5	-0.63	-0.86	-0.71	0.07	5.96e-10	0.62	0.62	0.77	-1.26	0.32	-0.22	0.3	0.42	-0.705	-0.18	-1.19	-2.18	-1.29	-0.31	-0.94	0.76
56954	hSQ010495	|| NIT2 || Nitrilase family, member 2 || Hs.439152 || NM_020202 || || 56954 || hHR003159 || 1424299	-0.95	-0.88	-0.44	-0.5	-0.16	-0.22	0.53	0.4	-0.01	0.63	-0.3	-0.08	-0.32	0.25	0.055	0.07	0.05	-0.25	-0.02	0.22	-0.32	0.35
51275	hSQ042155	|| || || || NM_016534 || || || hHR006833 || 1424317	-0.29	-0.29	-0.09	-0.69	-0.71	-0.59	0.97	0.84	0.92	1.16	0.57	-0.1	0.57	0.41	0.585	0.24	0.39	-0.04	0.24	0.16	-0.15	0.23
389416	hSQ038776	|| || || || XM_371837 || || || hHR027065 || 1424372	0.91	1.1	0.64	0.79	1.48	1.28	1.66	1.74	1.66	1.87	1.56	1.32	1.19	1.97	-0.185	-0.07	-0.08	-0.33	-0.33	0.45	-0.16	-0.5
439993	hSQ019552	|| || || || XM_495841 || || || hHR028963 || 1424434	-0.47	-0.59	-0.27	-0.22	-0.26	-0.27	0.54	0.41	0.97	0.84	0.2	-0.45	0.47	0.32	0.725	0.56	0.2	-0.05	-0.42	0.02	0.11	0.37
339175	hSQ042918	|| METTL2A || Methyltransferase like 2A || Hs.381204 || NM_001005372 || || 339175 || hHR030033 || 1424441	0.85	0.54	0.3	0.15	-0.37	-0.36	-2.61	-2.51	-2.27	-4.96	-1.3	-0.71	-0.91	-2.83	-1.845	-1.41	-1.29	-1.09	-0.31	-1.16	-0.33	-0.81
142	hSQ024541	|| PARP1 || Poly (ADP-ribose) polymerase family, member 1 || Hs.177766 || NM_001618 || || 142 || hHR016048 || 1424443	0.53	0.61	0.09	-0.54	-0.14	-0.19	0.49	0.37	-0.68	-0.38	-0.75	-0.67	0.18	-0.69	-1.375	-1.6	-1.6	-1.08	-0.53	-0.92	-1.23	-0.46
5927	hSQ023651	|| JARID1A || Jumonji, AT rich interactive domain 1A || Hs.654806 || NM_005056 || || 5927 || hHR013774 || 1424546	0.87	0.95	0.02	-0.07	0.15	0.51	-0.6	0.03	-0.85	-1.05	-0.82	-0.07	-0.01	-0.6	1.315	1.14	1.29	1.24	0.7	0.11	1.05	-0.47
342541	hSQ040530	|| || || || XM_292596 || || || hHR029602 || 1424563	-0.11	-0.12	0.32	-0.21	0.22	0.44	1.15	0.6	1.28	1.6	0.99	0.51	0.34	1.51	0.995	1.22	1.26	1.01	0.7	1.07	0.8	2.39
440347	hSQ040517	|| || || || XM_498637 || || || hHR026517 || 1424611	0.47	0.71	0.12	0.68	0.68	1.24	0.96	0.85	1.12	0.88	0.81	0.47	0.3	0.43	1.725	1.71	2.14	1.83	1.5	1.29	1.37	1.02
392490	hSQ023787	|| FLJ44635 || TPT1-like protein || Hs.660859 || NM_207422 || || 392490 || hHR029040 || 1424612	-1.26	-1.2	-0.4	-1.14	-0.69	-0.6	0.81	0.71	0.67	0.92	-0.18	-0.28	0.52	0.86	-0.505	-0.26	-0.31	-0.27	0.4	0.33	-0.67	1.47
10049	hSQ030922	|| DNAJB6 || DnaJ (Hsp40) homolog, subfamily B, member 6 || Hs.490745 || NM_058246 || || 10049 || hHR014167 || 1424616	0.53	0.55	0.13	0.32	0.34	0.35	0.55	0.64	-0.02	0.02	-0.13	0.1	0.61	-0.23	0.275	0.28	0.23	0.41	0.51	0.24	0.08	0.77
112936	hSQ018546	|| VPS26B || Vacuolar protein sorting 26 homolog B (S. pombe) || Hs.334684 || NM_052875 || || 112936 || hHR017744 || 1424684	0.01	0.03	0.37	0.11	-0.19	-0.03	-0.22	-0.08	-0.21	-0.21	-9.54e-09	-0.98	-0.09	-0.32	-0.905	-0.97	-0.64	-1.27	-0.25	-0.83	0.12	0.12
3145	hSQ040273	|| HMBS || Hydroxymethylbilane synthase || Hs.82609 || NM_000190 || || 3145 || hCM000981 || 1424735	-0.1	-0.2	-0.1	-0.18	-0.22	-0.25	1.07	0.93	0.63	0.7	0.84	-0.57	-0.03	0.72	1.015	0.81	0.78	0.38	0.04	0.15	0.89	0.58
341511	hSQ001159	|| || || || XM_292109 || || || hHR027951 || 1424740	1.66	1.56	0.38	0.15	1	1.18	3.24	3.02	2.36	2.37	2.3	1.41	1.49	1.8	0.355	0.26	-0.44	-0.46	-0.66	-0.13	-0.54	-1.22
84061	hSQ024812	|| RP11-217H1.1 || Implantation-associated protein || Hs.323562 || NM_032121 || || 84061 || hHR030429 || 1424742	-0.8	-0.54	-0.52	-0.57	-0.39	-0.28	-0.37	-0.19	0.15	0.19	-0.31	-0.05	-0.33	0.07	-0.045	0.1	0.02	-6.71e-10	0.35	0.12	0.29	-0.11
119504	hSQ026335	|| C10orf104 || Chromosome 10 open reading frame 104 || Hs.426296 || NM_173473 || || 119504 || hHR015452 || 1424757	-1.95	-2	-0.82	-1.13	-1.18	-1.26	-0.97	-0.94	-0.07	0.07	-1.41	-0.94	-0.7	-0.03	-0.455	-0.66	-0.47	-1.31	-0.18	-0.35	-0.9	0.97
402287	hSQ044153	|| || || || || || || hHR028039 || 1424765	0.13	0.15	-1	-0.87	-0.03	0.26	1.44	1.26	1	0.76	1.22	0.74	0.6	1.97	-0.355	-0.25	-0.39	-0.39	0.15	0.72	-0.67	-0.97
403	hSQ007208	|| ARL3 || ADP-ribosylation factor-like 3 || Hs.182215 || NM_004311 || || 403 || hHR006410 || 1424827	-0.29	-0.24	0.17	0.04	-0.27	-0.68	-0.47	-0.54	-0.15	-0.07	-0.29	-0.48	-0.1	-0.91	-0.235	-0.52	-0.93	-0.38	-0.75	-0.74	-1.08	-0.01
2501	hSQ018317	|| || || || L29074 || || || hHR029207 || 1424838	-0.03	0.05	0.68	-0.07	0.1	0.47	0.16	0.09	-8.94e-10	0.57	-0.49	-0.6	0.77	0.84	-0.165	0.04	-0.53	-0.35	0.31	0.24	-0.21	-0.14
4528	hSQ031464	|| MTIF2 || Mitochondrial translational initiation factor 2 || Hs.149894 || NM_001005369 || || 4528 || hHR014669 || 1424872	-1.12	-0.92	-1.02	-1.49	-1.15	-1.26	-0.67	-0.49	-0.98	-0.45	-1.77	-0.84	-0.2	-0.89	-2.595	-2.78	-4.04	-2.94	-0.89	-1.1	-2.8	-0.45
567	hSQ002549	|| B2M || Beta-2-microglobulin || Hs.693631 || NM_004048 || || 567 || hCM001089 || 1424946	-1.3	-1.43	-1.8	-1.36	-1.1	-0.68	0.69	0.35	0.89	0.96	0.5	0.05	-0.39	1.43	0.425	0.62	0.73	0.39	0.39	1.06	0.25	-0.39
121054	hSQ010311	|| || || || NC_000012 || || || hHR029874 || 1424975	-0.28	-0.44	-0.65	-0.85	-0.85	-0.59	1.39	1.35	0.47	0.34	1.17	-0.47	0.46	0.24	-1.035	-0.74	-0.97	-2.39	-1.18	-1.34	-0.69	-1.57
9883	hSQ033191	|| POM121 || POM121 membrane glycoprotein (rat) || Hs.655217 || NM_172020 || || 9883 || hHR029976 || 1425011	3.22	3.29	2.57	1.98	2.72	3.03	1.49	1.68	1.26	1.33	1.77	1.6	2.61	1.21	0.965	0.74	0.59	0.34	0.83	-0.03	0.45	-0.23
11157	hSQ039235	|| LSM6 || LSM6 homolog, U6 small nuclear RNA associated (S. cerevisiae) || Hs.190520 || NM_007080 || || 11157 || hHR025329 || 1425025	0.23	0.27	7.15e-09	-0.11	0.78	0.54	1.78	1.91	1.66	1.77	0.8	0.62	0.98	1.66	-0.395	-0.03	-0.69	-0.78	-0.42	0.31	-0.48	-0.38
283508	hSQ026993	|| DGKH || Diacylglycerol kinase, eta || Hs.659437 || AK090591 || || 160851 || hHR003084 || 1425029	-2.97	-2.66	-2.36	-2.14	-2.36	-2.52	-1.91	-2.25	-1.52	-1.4	-3.09	-1.8	-1.91	-1.88	0.975	0.8	0.59	0.51	0.22	-0.46	0.56	-1.15
567	hSQ002556	|| B2M || Beta-2-microglobulin || Hs.693631 || NM_004048 || || 567 || hCM001138 || 1425129	-1.41	-1.47	-1.12	-1	-0.73	-0.5	-0.08	-0.14	0.62	0.64	-0.02	0.06	-0.59	1.16	-0.115	0.06	0.03	-0.15	-0.02	0.92	-0.1	-0.48
441443	hSQ017714	|| || || || || || || hHR028913 || 1425149	0.13	0.23	0.28	-0.02	0.06	0.03	1.02	0.38	0.09	-0.54	0.85	0.11	0.48	-0.15	-1.275	-0.89	-1.01	-0.66	-0.77	-0.65	-1.14	-1.8
84140	hSQ005452	|| FLJ13305 || Hypothetical protein FLJ13305 || Hs.440466 || BX648834 || || 84140 || hHR004412 || 1425154	-0.83	-0.65	-0.56	-0.79	-0.25	-0.21	-0.1	0.23	-1.53	-1.45	-2.01	-0.96	-0.73	-1.6	-1.055	-1.3	-1.86	-1.56	-1.11	-1.48	-1.35	-0.48
440897	hSQ014325	|| || || || XM_496585 || || || hHR029978 || 1425159	-0.36	-0.04	0.41	0.39	0.35	0.68	-1.13	-1.92	-2.06	-1.91	-1.24	-0.28	-0.91	-1.57	-0.645	-1.01	-2.02	-1	-3.11	-2.74	-1.22	-3.93
284802	hSQ031497	|| || || || NM_207350 || || || hHR028270 || 1425165	0.52	0.54	-0.64	-0.77	0.15	0.12	2.11	1.93	1.14	1.1	1.1	0.48	1.1	0.37	-1.135	-0.87	-0.93	-1.38	-0.75	-0.78	-1.63	-1.25
392793	hSQ029417	|| || || || XM_374526 || || || hHR030072 || 1425186	-1.11	-0.83	-0.84	-1.27	-0.6	-0.49	0.6	0.52	-0.04	0.41	-0.34	-0.3	0.53	1.31	-1.055	-1.01	-1.17	-1.12	0.42	0.21	-1.23	-0.03
30011	hSQ043736	|| SH3KBP1 || SH3-domain kinase binding protein 1 || Hs.444770 || NM_031892 || || 30011 || hHR016118 || 1425190	1.56	1.52	0.74	0.9	1.07	0.83	0.58	0.83	0.03	-0.02	0.06	0.19	0.85	-0.25	-1.095	-1.16	-1.81	-0.25	-0.72	-0.77	-0.63	-1.15
3251	hSQ004873	|| HPRT1 || Hypoxanthine phosphoribosyltransferase 1 (Lesch-Nyhan syndrome) || Hs.412707 || NM_000194 || || 3251 || hCM000839 || 1425213	-1.76	-1.57	-1.1	-1.23	-0.87	-1.16	0.18	0.1	0.96	1.13	-0.3	-0.43	-0.35	0.21	0.225	-0.12	1.08	0.41	0.89	0.83	0.2	1.31
54921	hSQ024581	|| || || || NM_017804 || || || hHR027714 || 1425219	-0.22	-0.62	-0.47	-0.94	-1.06	-1.14	-0.04	-0.27	0.62	0.15	0.19	-0.6	0.51	-1.75	0.825	0.95	-0.51	-0.45	0.16	-0.16	-0.16	1.78
8833	hSQ011802	|| GMPS || Guanine monphosphate synthetase || Hs.591314 || NM_003875 || || 8833 || hHR008471 || 1425240	0.35	0.35	-0.57	-0.51	0.34	0.34	-0.86	-0.72	-0.27	-0.79	-0.02	0.41	0.51	1.08	-0.805	-0.69	0.18	0.12	0.52	0.75	0.08	0.44
9015	hSQ013658	|| TAF1A || TATA box binding protein (TBP)-associated factor, RNA polymerase I, A, 48kDa || Hs.153088 || NM_005681 || || 9015 || hHR030272 || 1425252	-0.95	-0.84	-0.71	-0.39	-1	-1.07	0.51	0.57	0.76	0.69	-0.29	-0.14	-0.44	-0.53	1.615	1.57	1.45	1.41	1.29	0.95	1.11	1.07
25809	hSQ014950	|| TTLL1 || Tubulin tyrosine ligase-like family, member 1 || Hs.660298 || NM_001008572 || || 25809 || hHR011922 || 1425257	0.96	0.87	0.72	0.35	-0.35	-0.24	1.04	1.11	0.21	0.33	0.35	-0.56	0.64	-0.83	-0.955	-0.52	-0.95	-1.15	-0.45	-0.49	-0.76	-0.34
56160	hSQ015552	|| NDNL2 || Necdin-like 2 || Hs.656412 || NM_138704 || || 56160 || hHR027178 || 1425307	-0.61	-0.62	-0.27	-0.51	-0.25	-0.18	0.84	0.88	0.4	0.68	0.06	-0.78	0.24	-0.17	0.885	0.98	0.76	0.35	0.87	0.41	0.85	0.44
79947	hSQ024207	|| DHDDS || Dehydrodolichyl diphosphate synthase || Hs.369385 || NM_024887 || || 79947 || hHR017447 || 1425351	0.61	0.82	0.67	0.11	0.72	0.7	0.64	0.36	0.2	0.42	0.56	-0.27	0.82	0.13	-0.035	0.07	-0.21	-0.24	0.07	-0.16	0.3	0.15
29092	hSQ029785	|| HSPC157 || HSPC157 protein || Hs.279842 || BC071749 || || 29092 || hHR014285 || 1425369	0.06	0.02	0.95	0.6	0.37	0.16	0.18	0.16	1.05	1.18	1.05	0.09	0.1	0.47	2.585	2.29	1.43	0.93	0.18	0.35	1.53	1.73
2107	hSQ043082	|| ETF1 || Eukaryotic translation termination factor 1 || Hs.483494 || NM_004730 || || 2107 || hHR028450 || 1425380	-0.31	-0.03	-0.44	-0.55	0.33	0.43	-0.04	-0.28	0.36	0.49	-0.22	0.21	0.42	0.83	-0.065	-0.27	0.22	0.61	0.27	0.09	0.05	0.41
2935	hSQ026995	|| GSPT1 || G1 to S phase transition 1 || Hs.528780 || NM_002094 || || 2935 || hHR021838 || 1425394	0.36	0.32	-0.3	-0.29	0.58	0.76	-0.16	-0.02	0.63	0.53	0.2	0.24	0.6	0.59	-0.105	-0.24	0.11	0.5	0.94	0.51	0.73	1.31
4710	hSQ036797	|| NDUFB4 || NADH dehydrogenase (ubiquinone) 1 beta subcomplex, 4, 15kDa || Hs.304613 || NM_004547 || || 4710 || hHR028539 || 1425412	-0.16	-0.14	0.4	-0.05	0.27	0.44	1.51	1.44	1.25	1.44	0.58	0.4	0.52	1.33	0.225	-0.01	-0.32	-0.91	-0.18	-0.21	-1.09	0.73
3145	hSQ018853	|| HMBS || Hydroxymethylbilane synthase || Hs.82609 || NM_000190 || || 3145 || hCM000951 || 1425435	-0.04	-0.25	-0.12	0.14	0.29	-0.16	0.6	0.65	0.39	0.71	0.67	-0.32	-0.33	0.23	0.355	0.13	0.19	0.15	-0.4	0.2	0.83	0.79
6607	hSQ035734	|| SMN2 || Survival of motor neuron 2, centromeric || Hs.202179 || NM_017411 || || 6607 || hHR030368 || 1425444	-1.09	-0.91	-1.14	-1.39	-0.72	-0.8	0.26	0.03	-0.27	-0.02	-0.71	-0.72	0.26	-0.68	-0.495	-0.06	5.96e-10	-0.28	0.8	0.47	-1.03	1.75
5034	hSQ038407	|| P4HB || Procollagen-proline, 2-oxoglutarate 4-dioxygenase (proline 4-hydroxylase), beta polypeptide || Hs.464336 || NM_000918 || || 5034 || hHR029623 || 1425454	0.55	0.86	0.96	0.57	0.82	0.76	0.16	0.17	-0.45	-0.16	-0.74	-0.62	0.21	0.11	-0.905	-0.83	-1.67	-1.62	-0.55	-0.91	-1.36	-0.63
388621	hSQ004861	|| || || || XM_371243 || || || hHR030472 || 1425477	-1.51	-1.38	-0.63	-1.47	-0.9	-0.95	0.03	-0.24	-0.41	0.33	-1.44	-0.97	-0.55	0.37	-1.275	-1.2	-2.01	-2.1	-0.16	-0.27	-2.28	0.49
3833	hSQ042495	|| KIFC1 || Kinesin family member C1 || Hs.436912 || BC073878 || || 3833 || hHR015552 || 1425506	-1.24	-2.2	-1.19	-1.33	-2.33	-1.92	-2.12	-1.73	-2.03	-2.68	-1.62	-1.7	-0.9	-3.07	-2.055	-1.33	-2.49	-2.44	-0.91	-0.88	-1.53	0.13
8541	hSQ038161	|| PPFIA3 || Protein tyrosine phosphatase, receptor type, f polypeptide (PTPRF), interacting protein (liprin), alpha 3 || Hs.413748 || NM_003660 || || 8541 || hHR024863 || 1425510	1.49	1.3	0.87	0.96	1.6	2.17	0.76	0.62	0.29	-0.52	2.07	1.37	0.51	0.53	2.645	2.25	2.36	0.94	0.88	0.44	2.5	1.12
10188	hSQ015598	|| TNK2 || Tyrosine kinase, non-receptor, 2 || Hs.518513 || NM_005781 || || 10188 || hHR018930 || 1425520	-0.14	0.02	-0.64	-0.99	-1.01	-1.16	-0.51	-0.13	-1.42	-1.68	-0.25	-2.24	-0.64	-2.75	1.175	1.07	1.26	-0.44	0.18	-0.95	0.93	-2.13
11342	hSQ027322	|| || || || NM_007282 || || || hHR027335 || 1425534	-0.57	-0.28	0.16	0.34	0.81	0.33	-1.43	-2.12	-0.27	-0.54	-0.52	0.41	-0.37	-0.21	-0.205	-0.29	0.59	0.98	0.51	0.54	0.25	0.06
5252	hSQ010953	|| PHF1 || PHD finger protein 1 || Hs.166204 || NM_024165 || || 5252 || hHR025043 || 1425555	1.99	2.2	2.41	1.87	1.51	1.95	1.56	1.87	1.29	1.35	1.06	0.62	0.9	0.24	2.025	2.01	1.84	0.87	1.13	0.55	1.73	1.2
3145	hSQ040270	|| HMBS || Hydroxymethylbilane synthase || Hs.82609 || NM_000190 || || 3145 || hCM001006 || 1425623	-0.05	-0.28	7.15e-09	-0.22	-0.31	0.18	0.91	0.61	0.87	0.77	0.87	-0.41	-1.34e-09	0.8	0.875	0.84	0.84	0.31	0.06	0.13	1.25	0.85
7754	hSQ013466	|| ZNF204 || Zinc finger protein 204 || Hs.8198 || AL833520 || || 7754 || hHR005372 || 1425624	-2.05	-1.88	-1.27	-1.2	-1.58	-1.61	-0.74	-0.55	-0.55	-0.22	-1.75	-0.98	-0.61	-0.99	-1.275	-1.56	-1.4	-1.68	-0.5	-0.69	-1.61	-0.25
6389	hSQ038009	|| SDHA || Succinate dehydrogenase complex, subunit A, flavoprotein (Fp) || Hs.440475 || NM_004168 || || 6389 || hCM001059 || 1425653	0.16	0.11	-0.39	-0.6	-0.42	-1.02	0.26	0.25	-0.21	-0.01	0.04	-0.82	0.37	-0.52	-1.105	-1.18	-1.21	-0.65	0.5	0.27	-0.02	0.32
6924	hSQ021143	|| TCEB3 || Transcription elongation factor B (SIII), polypeptide 3 (110kDa, elongin A) || Hs.584806 || NM_003198 || || 6924 || hHR007649 || 1425663	0.26	0.39	-0.12	-0.61	0.61	0.61	0.44	0.5	-1.06	-0.64	-0.65	-0.56	0.53	-1.05	-0.305	-0.71	-1.35	-0.92	-0.55	-0.67	-1.11	0.32
441561	hSQ025894	|| || || || XM_497231 || || || hHR028797 || 1425669	-0.32	-0.12	0.28	0.2	-0.04	-0.28	0.2	0.25	0.16	0.24	0.03	-0.39	0.33	-0.55	-2.225	-1.83	-3.5	-4.01	-0.8	-0.84	-1.16	-0.61
440997	hSQ026794	|| || || || XM_498957 || || || hHR029817 || 1425675	-0.43	-0.19	-0.01	-0.3	0.32	0.11	0.23	0.36	0.59	0.47	0.09	-0.35	0.72	0.4	0.405	0.69	0.55	0.11	-0.12	-0.15	0.3	-0.79
392487	hSQ041781	|| || || || XM_373354 || || || hHR028158 || 1425692	0.82	1.14	1.95	0.75	1.49	1.69	2.2	2.03	1.94	2.19	1.37	1.28	1.24	2.25	0.005	0.31	-0.89	-1.27	-0.05	0.23	-2.03	0.17
129401	hSQ032788	|| NUP35 || Nucleoporin 35kDa || Hs.180591 || NM_138285 || || 129401 || hHR012558 || 1425697	-1.61	-1.46	-0.86	-1	-0.71	-0.6	0.46	0.33	0.48	0.72	0.05	-0.47	-0.38	0.19	0.955	1.06	1	0.71	1.03	1.03	0.7	1.19
58509	hSQ039104	|| C19orf29 || Chromosome 19 open reading frame 29 || Hs.128425 || BC004262 || || 58509 || hHR008014 || 1425728	1.06	1.09	0.55	0.08	0.35	0.09	0.63	0.66	-0.11	-0.16	0.24	-0.95	0.2	-1.16	1.055	1.01	0.92	-0.26	0.5	-0.68	0.83	0.47
10054	hSQ022764	|| SAE2 || SUMO1 activating enzyme subunit 2 || Hs.631580 || NM_005499 || || 10054 || hHR029333 || 1425764	-1.02	-0.84	-0.84	-1.41	-0.61	-0.79	-0.36	-0.24	-0.64	-0.06	-1.46	-0.56	-0.41	-0.13	-0.995	-1.03	-0.95	-0.76	0.08	0.09	-1.04	0.94
10558	hSQ042768	|| SPTLC1 || Serine palmitoyltransferase, long chain base subunit 1 || Hs.90458 || NM_006415 || || 10558 || hHR001994 || 1425821	-0.43	-0.35	-0.55	-0.57	-0.21	-0.2	0.12	0.43	0.34	0.41	-0.42	-0.13	-0.12	0.27	0.315	-0.22	0.54	0.58	0.66	0.75	0.43	1.06
283820	hSQ025579	|| NOMO3 || NODAL modulator 3 || Hs.460141 || NM_173614 || || 408050 || hHR031373 || 1425825	0.52	0.6	0.31	0.1	0.41	0.55	-0.63	-0.52	-0.69	-0.48	-0.79	-0.29	0.3	-0.35	-0.575	-0.77	-0.91	-0.45	0.02	0.03	-0.48	0.42
5256	hSQ024088	|| PHKA2 || Phosphorylase kinase, alpha 2 (liver) || Hs.54941 || NM_000292 || || 5256 || hHR009503 || 1425900	-0.1	0.04	-0.58	-0.44	-0.5	-0.38	-1.45	-1.69	-1.64	-1.83	-2.06	-1.16	-1.16	-2	-0.935	-1.22	-1.62	-1.13	-0.95	-1.07	-0.05	-1.32
1112	hSQ043039	|| || || || NM_018589 || || || hHR030022 || 1425903	-0.01	0.03	-0.44	-0.51	-0.5	-0.44	-0.17	-0.44	-0.22	-0.39	-0.95	-0.65	-0.17	-0.82	0.595	0.34	0.54	0.44	0.19	-0.12	0.47	0.48
3145	hSQ018137	|| HMBS || Hydroxymethylbilane synthase || Hs.82609 || NM_000190 || || 3145 || hCM000876 || 1425977	-0.08	-0.27	-0.09	-0.17	7.15e-09	-0.19	0.52	0.65	0.75	0.75	0.75	-0.51	0.04	0.75	0.855	0.76	0.65	0.33	0.08	0.05	1.29	0.15
134492	hSQ026984	|| NUDCD2 || NudC domain containing 2 || Hs.140443 || NM_145266 || || 134492 || hHR003531 || 1425993	-2.54	-2.47	-1.36	-1.83	-1.39	-1.57	-0.65	-0.96	-0.51	0.26	-1.74	-1.07	-0.95	0.04	-1.425	-1.18	-1.52	-1.22	-0.41	-0.18	-1.8	0.43
84186	hSQ001065	|| ZCCHC7 || Zinc finger, CCHC domain containing 7 || Hs.654700 || NM_032226 || || 84186 || hHR024596 || 1426048	0.52	0.73	-0.06	-0.53	-0.16	0.4	1.62	1.6	0.31	0.36	0.06	0.13	0.37	0.1	-0.295	-0.3	-0.21	-0.32	-0.02	-0.45	-0.96	-0.09
23326	hSQ042792	|| USP22 || Ubiquitin specific peptidase 22 || Hs.462492 || AB028986 || || 23326 || hHR024803 || 1426086	0.03	0.11	-0.29	-0.73	-0.54	-0.49	-1.07	-0.52	-1.02	-1.06	-0.71	-1.26	0.29	-1.05	0.075	-0.01	-0.06	0.38	0.49	-0.23	0.68	0.51
4281	hSQ003665	|| MID1 || Midline 1 (Opitz/BBB syndrome) || Hs.27695 || NM_000381 || || 4281 || hHR002515 || 1426090	-0.19	-0.11	-0.45	-0.21	-0.12	-0.02	-0.93	-0.85	-1.74	-1.38	-1.55	-0.6	-0.44	-1.43	-1.325	-1.77	-1.24	-0.89	-0.97	-1.15	-1.64	-2.14
200916	hSQ016159	|| RPL22L1 || Ribosomal protein L22-like 1 || Hs.380933 || BC049823 || || 200916 || hHR016356 || 1426143	-1.09	-0.97	0.02	-0.5	-0.45	-0.29	1	0.77	1.04	1.16	0.15	-0.39	-0.17	1.16	0.115	0.14	0.8	1.04	0.75	0.92	1.31	1.39
118	hSQ005504	|| ADD1 || Adducin 1 (alpha) || Hs.183706 || NM_176801 || || 118 || hHR007389 || 1426217	0.95	1.17	0.96	0.58	1.15	1.05	-0.18	-0.29	-0.56	-0.57	-0.35	-0.24	0.36	-0.09	-0.785	-1.02	-1.18	-1.31	-0.81	-0.79	-0.89	-0.86
302	hSQ040431	|| ANXA2 || Annexin A2 || Hs.511605 || NM_004039 || || 302 || hHR028020 || 1426247	1.03	1.03	0.48	0.45	1.13	0.82	2	2.2	1.45	1.67	1.68	1	1.61	0.76	0.195	0.25	0.57	0.02	0.24	0.58	-0.4	0.66
157317	hSQ025634	|| || || || M22900 || || || hHR029784 || 1426272	-1.64	-1.32	-0.83	-1.55	-0.63	-0.55	-0.05	-0.07	0.07	0.43	-0.69	-0.32	-0.11	0.92	-0.715	-0.75	-0.14	-0.42	0.23	0.13	-0.8	0.25
440450	hSQ014802	|| || || || XM_498676 || || || hHR017867 || 1426352	-0.66	-0.84	0.37	-0.17	-0.16	-0.34	0.85	0.68	1.21	0.94	1.14	-0.61	0.31	0.86	1.385	0.79	0.16	-1.17	-0.95	-0.94	0.35	-1.13
11198	hSQ036523	|| SUPT16H || Suppressor of Ty 16 homolog (S. cerevisiae) || Hs.213724 || NM_007192 || || 11198 || hHR026920 || 1426394	0.98	1.41	1.35	0.5	0.99	1.61	1.01	1.27	-0.17	0.07	-0.3	0.47	0.75	0.21	0.185	-0.01	-0.35	-0.51	0.03	-0.33	-0.23	0.33
6389	hSQ038016	|| SDHA || Succinate dehydrogenase complex, subunit A, flavoprotein (Fp) || Hs.440475 || NM_004168 || || 6389 || hCM001082 || 1426434	0.39	0.25	-0.34	-0.47	-0.49	-0.82	0.28	0.31	0.05	0.27	0.24	-0.65	0.26	-0.63	-1.135	-1.33	-1.01	-0.49	0.52	0.4	0.16	0.24
4841	hSQ044864	|| NONO || Non-POU domain containing, octamer-binding || Hs.533282 || NM_007363 || || 4841 || hHR028110 || 1426439	2.01	2.07	1.76	1.22	1.75	2.05	1.4	1.55	0.33	0.69	0.2	0.81	0.91	0.74	-0.695	-1.1	-1.58	-1.33	-0.99	-0.61	-0.62	-0.19
5814	hSQ032137	|| PURB || Purine-rich element binding protein B || Hs.349150 || NM_033224 || || 5814 || hHR012434 || 1426446	-2.04	-1.88	-1.99	-2.44	-1.95	-2.24	-2.72	-2.71	-2.32	-2.04	-2.89	-2.76	-1.68	-2.4	-0.095	-0.32	-0.25	-0.4	-0.21	-0.33	-0.34	-0.15
23515	hSQ018882	|| MORC3 || MORC family CW-type zinc finger 3 || Hs.421150 || NM_015358 || || 23515 || hHR003069 || 1426504	-0.22	-0.14	-0.34	-0.33	0.34	0.7	0.48	0.27	0.04	0.22	-0.64	0.06	-0.13	0.76	0.305	0.16	-0.2	-0.17	1.05	0.69	0.22	0.98
440365	hSQ016398	|| || similar to B-cell receptor-associated protein 31 (BCR-associated protein Bap31) (p28 Bap31) (CDM protein) (6C6-AG tumor-associated antigen) (DXS1357E) || || || || || hHR032014 || 1426514	-0.27	-0.24	0.37	-0.26	0.11	0.31	0.55	0.56	0.8	0.82	0.72	-0.16	0.58	0.77	-0.565	-0.25	-1.1	-1.39	-0.58	-0.48	-3.58e-09	0.41
130773	hSQ022277	|| || || || XM_065899 || || || hHR028834 || 1426596	1.12	1.42	1.06	0.53	1.7	1.8	2.5	2.27	1.71	2.17	1.64	1.22	1.56	2.49	-0.165	0.16	-0.98	-1	-0.51	0.04	-1.23	-0.06
57092	hSQ004947	|| PCNP || PEST proteolytic signal containing nuclear protein || Hs.654949 || NM_020357 || || 57092 || hHR028902 || 1426626	-0.39	-0.22	-0.8	-1.1	-0.59	-0.33	1.09	1.01	0.41	0.43	-0.26	-0.39	0.04	0.5	-0.395	-0.64	-0.33	-0.33	0.51	0.03	-0.64	0.37
79837	hSQ006709	|| PIP5K2C || Phosphatidylinositol-4-phosphate 5-kinase, type II, gamma || Hs.144502 || NM_024779 || || 79837 || hHR016244 || 1426695	0.94	0.89	0.72	0.53	0.64	0.72	1.33	1.22	1	1.04	0.66	0.36	0.96	0.62	1.775	1.56	1.37	1.34	0.94	0.48	1.43	2.22
54849	hSQ004124	|| FLJ20186 || Hypothetical protein FLJ20186 || Hs.62771 || NM_207514 || || 54849 || hHR025636 || 1426705	-0.08	-0.29	0.04	-0.58	-0.04	0.2	1.46	1.19	1.16	0.88	1.67	0.13	-0.18	0.87	0.365	0.25	0.07	-0.67	-0.64	-0.29	0.25	-0.51
283267	hSQ004648	|| LOC283267 || Hypothetical protein LOC283267 || Hs.533701 || AK091059 || || 283267 || hHR010851 || 1426781	-0.09	-0.3	-0.83	-0.97	-0.86	-0.63	-0.58	-0.75	-0.55	-0.63	-1.11	-1.06	-0.46	-1.2	-0.275	-0.8	-0.1	-0.34	-0.29	-0.65	-0.3	-0.56
391800	hSQ037839	|| || || || XM_498006 || || || hHR026474 || 1426793	0.46	0.28	0.33	7.15e-09	0.54	0.73	1.21	1.17	0.98	0.4	1.25	0.67	0.79	0.98	-0.405	-0.49	-0.72	-0.91	-0.69	0.11	-0.61	0.3
150776	hSQ010503	|| FLJ41352 || FLJ41352 protein || Hs.535622 || AK123346 || || 150776 || hHR030982 || 1426854	0.31	0.43	0.84	0.05	0.54	0.56	0.16	-0.27	-0.24	0.01	-0.11	-0.38	0.37	-0.19	0.355	0.36	0.6	-0.01	0.29	-0.11	0.28	1.15
388639	hSQ010696	|| || || || XM_373846 || || || hHR001541 || 1426872	2.87	2.73	2.05	1.16	1.13	1.23	1.3	1.34	0.62	0.38	0.87	0.32	0.71	-0.57	1.335	1.16	0.69	0.48	0.31	-0.24	0.89	1.03
6908	hSQ009328	|| TBP || TATA box binding protein || Hs.590872 || NM_003194 || || 6908 || hCM000944 || 1426890	0.3	0.34	-0.02	0.16	0.04	0.09	0.33	0.69	0.54	0.56	-0.08	0.07	0.24	-0.11	0.475	0.39	0.79	0.99	0.62	1.27	1.45	1.08
54476	hSQ033817	|| TRIAD3 || TRIAD3 protein || Hs.487458 || NM_207111 || || 54476 || hHR008738 || 1426912	0.34	0.44	-0.43	-0.84	-0.16	0.04	-0.27	-0.07	-1.2	-1.14	-0.6	-1.53	-0.81	-1.64	0.215	0.07	-0.16	-0.57	-0.06	-1.42	-0.04	-2.12
283454	hSQ004872	|| LOC283454 || Hypothetical protein LOC283454 || Hs.26605 || AK094730 || || 283454 || hHR010853 || 1426921	-1.01	-1.14	-1.02	-1.35	-1.73	-1.39	-1.32	-0.95	-1.17	-1.21	-1.04	-1.41	-0.39	-1.53	0.415	-0.06	0.21	0.16	0.35	-0.01	0.21	-1.21
442589	hSQ030876	|| || || || XM_499331 || || || hHR029166 || 1427007	0.1	0.04	0.52	0.32	0.1	0.05	1.38	1.46	1.44	1.55	1.26	0.05	0.51	0.63	0.665	0.5	0.74	0.35	0.16	0.49	0.62	0.84
8214	hSQ022801	|| DGCR6 || DiGeorge syndrome critical region gene 6 || Hs.474185 || NM_005675 || || 8214 || hHR031055 || 1427020	-0.93	-0.85	-0.31	-0.99	-0.59	-0.66	0.1	0.26	0.36	0.25	0.49	-0.92	-0.06	0.47	0.035	0.35	-0.8	-1.49	-0.43	-0.94	0.67	0.43
9749	hSQ040181	|| PHACTR2 || Phosphatase and actin regulator 2 || Hs.654921 || AB014580 || || 9749 || hHR001643 || 1427049	-0.21	0.22	-0.2	0.01	0.22	0.58	-1.51	-1.68	-2.06	-2.68	-2.94	-0.81	-1.67	-1.29	-2.075	-2.08	-3.42	-1.1	-1.48	-2.05	-1.98	-2.8
149013	hSQ044353	|| || || || AB033071 || || || hHR026970 || 1427108	-1.84	-1.96	-1.33	-1.55	-1.6	-1.88	-2.37	-5.7	-3.48	-4.08	-3.59	-2.55	-2.35	-3.85	-4.185	-3.49	-5.1	-4.86	-2.29	-2.4	-3.05	-3.19
400452	hSQ012314	|| || || || XM_375261 || || || hHR030554 || 1427116	-1.07	-0.98	-1.34	-1.33	-0.93	-0.63	0.2	-0.08	-0.26	-0.7	-0.17	-0.96	-0.24	0.27	-1.345	-1.4	-1.5	-1.45	-0.5	-0.15	-1.12	-0.62
7416	hSQ028857	|| VDAC1 || Voltage-dependent anion channel 1 || Hs.519320 || NM_003374 || || 7416 || hHR029804 || 1427125	-0.31	-0.18	0.18	-0.01	0.07	5.96e-10	0.65	0.53	0.53	0.6	-0.15	-0.08	0.45	0.19	0.245	0.17	0.38	0.38	0.64	0.28	-0.42	0.88
51582	hSQ036515	|| AZIN1 || Antizyme inhibitor 1 || Hs.459106 || NM_015878 || || 51582 || hHR009135 || 1427136	-0.7	-0.53	-0.73	-0.8	-0.76	-0.83	-0.97	-1	-0.02	-0.03	-0.68	-0.14	-0.07	0.36	-0.065	-0.09	0.42	0.16	0.86	0.38	-0.01	0.41
91461	hSQ027020	|| LOC91461 || Hypothetical protein BC007901 || Hs.408542 || BC007901 || || 91461 || hHR021106 || 1427164	-0.37	-0.53	-0.75	-0.6	-0.42	-0.66	-0.84	-0.77	-0.83	-1.13	-1.1	-1.46	-0.84	-1.71	1.135	1.33	1.3	0.15	0.71	-2.68e-09	1.43	-0.02
27327	hSQ013293	|| TNRC6A || Trinucleotide repeat containing 6A || Hs.655057 || NM_014494 || || 27327 || hHR019278 || 1427199	-0.28	-0.28	0.11	-0.09	-0.31	-0.22	-0.52	-0.3	-0.66	-0.57	-1.76	-0.71	-0.56	-1.41	1.145	1	0.59	1.01	0.9	0.66	0.51	0.92
23471	hSQ002807	|| TRAM1 || Translocation associated membrane protein 1 || Hs.491988 || NM_014294 || || 23471 || hHR006708 || 1427217	-0.76	-0.53	-0.2	-0.62	0.25	0.25	-0.55	-0.94	0.23	0.39	-1.09	-0.1	-0.32	0.68	-0.605	-0.66	-0.05	-0.22	0.41	0.36	-0.69	1.4
57820	hSQ044204	|| CCNB1IP1 || Cyclin B1 interacting protein 1 || Hs.107003 || NM_182851 || || 57820 || hHR027663 || 1427242	-0.44	-0.67	-0.44	-1.06	-1.02	-1.39	0.87	0.7	1.04	1.05	0.4	-0.32	-0.03	-0.64	1.245	0.77	1.49	1.03	1.01	0.74	0.78	1.39
2040	hSQ004980	|| STOM || Stomatin || Hs.253903 || NM_004099 || || 2040 || hHR010438 || 1427267	-0.45	-0.41	0.2	-0.17	0.22	0.19	0.31	0.21	0.58	0.58	-0.15	0.04	0.44	0.47	0.755	0.54	0.88	0.63	0.34	0.44	0.57	1.58
6389	hSQ038015	|| SDHA || Succinate dehydrogenase complex, subunit A, flavoprotein (Fp) || Hs.440475 || NM_004168 || || 6389 || hCM001108 || 1427302	0.22	0.28	-0.12	-0.36	-0.44	-0.9	0.26	0.5	0.09	0.23	0.2	-0.45	0.3	-0.52	-1.215	-1.04	-1.17	-0.69	0.47	0.44	-3.58e-09	0.78
23099	hSQ041463	|| ZBTB43 || Zinc finger and BTB domain containing 43 || Hs.591903 || NM_014007 || || 23099 || hHR009372 || 1427322	-0.86	-0.74	-0.15	-0.23	-0.64	-0.6	-1.88	-2.09	-2.27	-2.24	-2.44	-1.37	-1.12	-1.79	-0.945	-0.99	-0.46	0.29	-0.15	-0.25	0.01	-0.34
146053	hSQ028695	|| || || || XM_016713 || || || hHR030741 || 1427341	-0.47	-0.27	-0.78	-1.27	-0.13	0.22	1.23	0.79	0.51	0.79	0.49	0.43	0.45	2.06	-0.585	-0.43	-0.77	-0.86	0.25	0.51	-1.3	-0.04
84172	hSQ021001	|| POLR1B || Polymerase (RNA) I polypeptide B, 128kDa || Hs.86337 || NM_019014 || || 84172 || hHR004725 || 1427397	-0.16	0.15	-0.09	-0.17	7.15e-09	0.47	-0.67	-0.69	-0.97	-0.6	-0.86	-0.49	-0.33	-0.3	0.775	0.27	0.5	0.74	0.6	0.22	0.56	0.65
283768	hSQ023798	|| GOLGA8G || Golgi autoantigen, golgin subfamily a, 8G || Hs.525714 || NM_001012420 || || 283768 || hHR030222 || 1427431	-2.92	-3.1	-2.31	-2.49	-2.86	-2.6	-1.88	-2.02	-3.83	-3.16	-5.4	-3.82	-2.51	-4.8	-1.765	-1.8	-2.47	-2.62	-0.57	-1.27	-1.88	-1.84
26778	hSQ039744	|| RPL10 || Ribosomal protein L10 || Hs.534404 || Y11164 || || 6134 || hHR030318 || 1427464	-0.14	-0.15	-0.39	-0.43	-0.78	-0.65	0.07	-0.16	0.13	0.08	-0.29	-1.65	0.42	-0.86	0.115	-0.46	-0.68	-1.37	-1.81	-1.17	0.11	-0.6
51514	hSQ008737	|| DTL || Denticleless homolog (Drosophila) || Hs.656473 || NM_016448 || || 51514 || hHR013734 || 1427474	-0.08	0.08	-0.33	-0.74	-0.54	-0.3	0.01	0.32	0.03	0.13	0.08	-0.03	0.45	0.25	1.505	1.18	0.93	0.91	1.31	0.69	0.48	1.15
79176	hSQ021659	|| FBXL15 || F-box and leucine-rich repeat protein 15 || Hs.380081 || BC036120 || || 79176 || hHR018646 || 1427503	-0.73	-0.91	-0.39	-0.81	-0.25	-0.21	0.59	0.66	0.53	0.43	0.93	-0.66	0.42	0.64	1.325	1.61	1.39	0.29	0.11	-0.23	1.9	-0.17
23265	hSQ021971	|| EXOC7 || Exocyst complex component 7 || Hs.533985 || NM_015219 || || 23265 || hHR012983 || 1427545	-0.17	-0.03	-0.73	-1.17	-0.38	-0.61	-0.67	-0.47	-1.41	-1.54	-1.1	-1.87	-0.25	-1.42	-1.095	-1.28	-2.24	-2.07	-0.6	-1.77	-0.85	-2.64
440126	hSQ006246	|| || || || XM_165533 || || || hHR029115 || 1427564	0.43	0.3	0.54	-0.19	0.39	0.38	1.47	1.35	1.57	1.58	1.18	0.61	0.34	1.14	1.765	1.47	1.65	0.81	1	1.35	1.54	2.03
400749	hSQ012178	|| || || || XM_375714 || || || hHR009822 || 1427565	-2.38	-2.77	-3.06	-2.93	-2.61	-2.97	-2.94	-2.55	-3.76	-3.73	-4.04	-3.75	-2.01	-4.71	-0.715	-0.54	-1.53	-1.52	-1.2	-2.14	-0.3	-2.79
401330	hSQ018700	|| || similar to uroplakin IIIb || || || || || hHR028486 || 1427580	0.95	0.8	0.83	0.38	0.68	0.92	0.36	-0.11	-0.12	-1.1	1.23	0.02	0.09	0.14	0.695	1	1.17	0.24	2.24e-10	0.35	1.51	1.26
26149	hSQ039230	|| ZNF658 || Zinc finger protein 658 || Hs.522147 || NM_033160 || || 26149 || hHR031020 || 1427583	-0.47	-0.39	-0.51	-0.8	-0.88	-1.09	-0.58	-0.18	0.13	-0.01	-0.68	-0.08	0.03	-0.3	0.345	0.48	0.59	0.6	1.05	0.31	0.22	0.64
3251	hSQ037687	|| HPRT1 || Hypoxanthine phosphoribosyltransferase 1 (Lesch-Nyhan syndrome) || Hs.412707 || NM_000194 || || 3251 || hCM000914 || 1427593	-1.55	-1.74	-1.32	-1.53	-0.98	-1.41	-0.32	-0.05	0.55	0.89	-0.37	-0.35	-0.66	-0.18	-0.095	-0.34	0.61	0.28	0.56	0.64	0.12	0.72
11260	hSQ034727	|| XPOT || Exportin, tRNA (nuclear export receptor for tRNAs) || Hs.85951 || NM_007235 || || 11260 || hHR028581 || 1427615	-1.21	-0.92	-0.46	-0.84	-0.45	-0.62	-1.61	-1.47	-0.73	-0.74	-1.59	-0.68	-0.41	-0.11	-1.615	-1.59	-1.55	-0.59	0.04	-0.22	-1.24	0.8
414153	hSQ023690	|| || || || XM_034623 || || || hHR029673 || 1427666	-1.72	-1.57	-1.01	-1.52	-0.81	-0.37	0.99	0.48	1.01	1.22	-0.55	-0.15	0.16	0.92	0.185	0.23	-0.81	-0.93	0.07	0.05	-1.46	-1.49e-09
441050	hSQ037080	|| || || || XM_496721 || || || hHR028029 || 1427685	-1.2	-0.78	7.15e-09	-0.34	0.31	0.63	-1.33	-2.14	-1.34	-1.04	-2.12	-0.3	-0.86	0.38	-1.765	-1.51	-1.61	-1.34	-0.01	0.47	-1.36	0.52
31	hSQ027617	|| ACACA || Acetyl-Coenzyme A carboxylase alpha || Hs.160556 || NM_198839 || || 31 || hHR012308 || 1427690	-0.12	-0.2	-1.09	-1.08	-0.96	-1.13	-1.22	-1.03	-1.82	-1.77	-1.57	-1.64	-0.29	-2.19	0.235	0.07	0.24	0.29	0.6	-0.29	0.22	-1.68
25798	hSQ045525	|| BRI3 || Brain protein I3 || Hs.567438 || NM_015379 || || 25798 || hHR029768 || 1427705	-1.57	-1.45	0.3	-0.41	-0.18	0.11	0.2	-0.28	-0.23	0.2	-0.67	-0.91	-0.32	0.81	2.015	2.06	1.82	1.1	1.18	1.12	0.74	1.45
55344	hSQ009388	|| PLCXD1 || Phosphatidylinositol-specific phospholipase C, X domain containing 1 || Hs.522568 || NM_018390 || || 55344 || hHR031101 || 1427783	-1.73	-1.62	-1.06	-1.31	-1.36	-1.27	-1.97	-1.79	-2.07	-1.97	-2.02	-2.1	-1.34	-2.29	-0.765	-0.67	-1	-1.89	-1.22	-1.6	-0.89	-1.25
140461	hSQ040780	|| ASB8 || Ankyrin repeat and SOCS box-containing 8 || Hs.432699 || NM_024095 || || 140461 || hHR006646 || 1427790	-0.8	-0.7	-0.56	-0.88	-0.41	-0.07	0.15	0.02	0.1	0.37	-0.65	-0.55	0.12	-0.58	0.295	0.08	-0.11	-0.12	0.52	0.32	-0.46	0.56
81557	hSQ006078	|| MAGED4 || Melanoma antigen family D, 4 || Hs.522650 || NM_030801 || || 81557 || hHR029289 || 1427803	1.5	1.33	1.1	0.74	0.46	0.48	1.39	1.37	0.55	0.26	1.1	-0.23	0.46	-0.35	0.435	0.3	-0.19	-0.53	-0.56	-0.92	0.31	-1.08
9240	hSQ020392	|| PNMA1 || Paraneoplastic antigen MA1 || Hs.194709 || NM_006029 || || 9240 || hHR005428 || 1427840	-1.41	-1.28	-1	-1.39	-0.84	-0.94	-1.32	-1.6	-0.93	-0.76	-1.42	-1.11	-0.69	-0.95	-1.715	-1.35	-1.79	-1.4	-0.44	-0.5	-1.05	-0.05
5860	hSQ031757	|| QDPR || Quinoid dihydropteridine reductase || Hs.75438 || NM_000320 || || 5860 || hHR004004 || 1427864	-0.67	-0.61	0.19	-0.27	-0.22	-0.44	0.06	-0.12	0.35	0.39	-0.57	-0.4	0.27	0.26	0.245	0.46	-0.05	-0.24	0.41	0.15	0.21	0.85
1509	hSQ027633	|| CTSD || Cathepsin D || Hs.654447 || NM_001909 || || 1509 || hHR020309 || 1427878	1.18	0.93	1.4	0.5	0.83	0.74	0.93	1.04	0.82	0.44	0.99	0.17	0.54	0.48	0.995	1.31	0.47	-0.03	-0.59	-0.53	1.26	1.28
1622	hSQ002454	|| DBI || Diazepam binding inhibitor (GABA receptor modulator, acyl-Coenzyme A binding protein) || Hs.78888 || NM_020548 || || 1622 || hHR026241 || 1427897	-0.84	-0.78	-0.16	-0.73	-0.45	-0.31	2.07	1.82	1.74	1.89	0.91	0.39	0.65	1.09	0.535	0.68	-0.41	-0.46	0.06	0.06	-0.72	1.26
7417	hSQ017770	|| VDAC2 || Voltage-dependent anion channel 2 || Hs.355927 || NM_003375 || || 7417 || hHR010298 || 1428005	-0.25	-0.09	-0.08	-0.4	0.27	0.14	0.55	0.3	0.59	0.9	-0.17	0.04	0.28	0.56	0.175	-0.19	0.56	0.07	0.14	0.44	-0.17	0.31
64897	hSQ015580	|| C12orf43 || Chromosome 12 open reading frame 43 || Hs.528671 || NM_022895 || || 64897 || hHR011730 || 1428015	0.28	0.16	-0.14	-0.59	-0.33	-0.5	0.34	0.43	-0.49	-0.48	0.02	-1.01	-1.34e-09	-1.27	-1.885	-1.61	-1.85	-1.92	-0.94	-1.37	-1.54	-0.78
121642	hSQ040575	|| ALKBH2 || AlkB, alkylation repair homolog 2 (E. coli) || Hs.374458 || NM_001001655 || || 121642 || hHR013552 || 1428022	-0.23	-0.38	-0.13	-0.68	-0.99	-1.13	-0.06	-0.11	-0.16	-0.36	0.62	-0.72	0.3	-0.3	-0.735	-0.87	-0.74	-1.37	-0.8	-0.8	-0.27	-0.9
5727	hSQ026082	|| PTCH1 || Patched homolog 1 (Drosophila) || Hs.494538 || NM_000264 || || 5727 || hHR031402 || 1428050	-0.25	-0.1	0.44	0.03	-0.16	0.26	-1.74	-1.58	-1.5	-1.55	-0.97	-0.8	-1.03	-2.53	-0.075	-0.56	-1	-0.04	0.2	-0.6	-0.23	-1.48
57819	hSQ027362	|| LSM2 || LSM2 homolog, U6 small nuclear RNA associated (S. cerevisiae) || Hs.103106 || NM_021177 || || 57819 || hHR024322 || 1428051	0.47	0.33	0.53	0.36	0.5	2.06	0.87	0.82	1.74	0.96	1.44	0.42	0.47	1.51	1.995	1.85	1.43	1.01	-0.03	0.89	1.16	0.37
6606	hSQ028784	|| SMN1 || Survival of motor neuron 1, telomeric || Hs.535788 || NM_000344 || || 6606 || hHR028907 || 1428097	-0.4	-0.43	-1.02	-1.3	-0.73	-0.81	-0.43	-0.46	-0.56	-0.81	-0.32	-0.52	0.21	-0.4	-0.575	-0.17	0.06	-6.71e-10	0.99	0.78	-0.33	1.35
401059	hSQ022112	|| || || || XM_379184 || || || hHR004605 || 1428129	-0.49	-0.26	0.04	0.17	0.05	0.03	-1.17	-1.1	-1.18	-1.03	-1.58	-0.49	-0.22	-1.73	-1.045	-1.48	-1.24	-0.51	-0.5	-0.57	-0.82	-0.86
220906	hSQ002181	|| LOC220906 || Hypothetical protein LOC220906 || Hs.403253 || BC045818 || || 220906 || hHR030068 || 1428135	-1.31	-1.26	-1.07	-1.34	-1.36	-1.48	0.07	0.16	-0.52	-0.28	-0.87	-1.32	-0.05	-1.21	-0.185	-0.43	-0.67	-0.57	-0.04	-0.23	-0.48	-0.67
388579	hSQ001639	|| || || || XM_371207 || || || hHR030175 || 1428165	0.65	0.57	0.45	0.17	-0.01	0.08	1.12	1.22	1.43	1.32	1.77	0.37	0.69	0.41	1.105	1.09	0.92	0.15	0.16	0.38	0.96	1.76
6642	hSQ014565	|| SNX1 || Sorting nexin 1 || Hs.188634 || NM_003099 || || 6642 || hHR008416 || 1428177	0.47	0.4	0.66	-0.09	0.22	0.28	0.73	0.88	-0.18	0.07	0.21	-0.21	0.59	-0.23	-1.135	-1.04	-0.91	-0.89	-0.39	-0.15	-0.41	1.04
84331	hSQ007784	|| C16orf14 || Chromosome 16 open reading frame 14 || Hs.417710 || NM_138418 || || 84331 || hHR027796 || 1428197	-0.44	-0.59	0.14	-0.36	-0.04	0.09	1.35	1.41	1.27	1.09	1.43	-0.25	0.2	0.74	1.845	1.81	1.38	0.5	0.04	-0.11	1.46	1.84
11159	hSQ042484	|| RABL2A || RAB, member of RAS oncogene family-like 2A || Hs.446425 || NM_013412 || || 11159 || hHR030263 || 1428199	1.38	1.43	1.65	0.97	1.21	1.51	1.96	2	1.52	1.55	0.99	0.35	1.59	0.98	1.085	0.89	0.66	0.59	0.2	-0.1	0.51	0.81
23598	hSQ022142	|| PATZ1 || POZ (BTB) and AT hook containing zinc finger 1 || Hs.517557 || NM_014323 || || 23598 || hHR011909 || 1428205	1.44	1.49	0.85	0.53	0.39	0.8	1.59	1.57	0.42	0.59	0.85	-0.01	0.9	-0.32	0.935	0.77	0.24	-0.25	0.18	-0.26	-0.16	1.09
11091	hSQ016059	|| WDR5 || WD repeat domain 5 || Hs.397638 || NM_017588 || || 11091 || hHR013870 || 1428244	-0.32	-0.43	-0.26	-0.53	-0.1	-0.18	-0.47	-0.54	-0.28	-0.36	0.16	-0.72	0.38	-0.34	0.605	0.6	1.27	0.86	0.92	0.65	1.02	1.68
4082	hSQ043719	|| MARCKS || Myristoylated alanine-rich protein kinase C substrate || Hs.519909 || NM_002356 || || 4082 || hHR022924 || 1428259	0.44	0.41	0.8	0.54	-0.05	0.35	-0.24	-0.63	-0.2	-0.57	0.62	-0.26	-0.8	-0.91	-1.065	-0.55	-0.81	-0.89	-1.36	-1.51	0.03	-1.34
155400	hSQ038972	|| || || Hs.632322 || || || || hHR028982 || 1428270	-0.39	-0.53	-0.09	-0.53	-0.18	-0.28	-0.17	-0.23	-0.5	-0.3	0.29	-0.49	-0.6	0.06	0.215	0.42	0.25	-6.71e-10	-0.11	0.23	1.43	1.13
1781	hSQ023217	|| DYNC1I2 || Dynein, cytoplasmic 1, intermediate chain 2 || Hs.546250 || NM_001378 || || 1781 || hHR030878 || 1428304	1.41	1.53	0.85	0.75	1.97	2.15	2.47	2.48	0.79	1.09	0.44	1.17	1.17	1.45	-0.375	-0.53	-0.53	-0.01	0.01	0.38	-0.38	1.16
26099	hSQ012905	|| C1orf144 || Chromosome 1 open reading frame 144 || Hs.252967 || NM_015609 || || 26099 || hHR019896 || 1428374	0.11	0.3	0.59	0.22	0.36	0.6	0.32	0.35	0.41	0.61	0.56	-0.12	0.71	0.16	-0.155	0.06	0.35	-0.17	0.29	-0.08	0.49	0.56
285407	hSQ041121	|| LOC285407 || Similar to beta-1,4-mannosyltransferase || Hs.657094 || XM_209597 || || 285407 || hHR030347 || 1428375	-0.2	-0.24	0.45	-0.13	-0.1	-0.16	0.57	0.51	1.16	0.9	0.64	-0.1	0.41	0.69	2.105	1.9	1.67	1.58	0.88	0.98	1.88	1.24
3134	hSQ033809	|| HLA-F || Major histocompatibility complex, class I, F || Hs.519972 || NM_018950 || || 3134 || hHR025944 || 1428393	-0.62	-0.47	0.12	-0.38	-0.13	0.22	1.07	0.9	0.68	0.64	0.8	-0.51	0.04	1.03	-0.095	0.34	0.5	-0.16	0.14	-0.48	0.89	-0.45
1595	hSQ002635	|| CYP51A1 || Cytochrome P450, family 51, subfamily A, polypeptide 1 || Hs.417077 || NM_000786 || || 1595 || hHR029619 || 1428404	-1.18	-1.18	-0.65	-1.13	-0.47	-0.63	-1.25	-1.36	-0.61	-0.26	-0.87	-0.29	-0.43	-0.23	-1.215	-0.99	-0.5	-0.45	-0.29	0.02	-0.67	1.19
3843	hSQ021437	|| RANBP5 || RAN binding protein 5 || Hs.643743 || NM_002271 || || 3843 || hHR003924 || 1428435	1.06	1.25	0.14	0.09	0.65	0.81	-0.49	-0.61	0.27	0.45	-0.25	0.68	0.17	0.6	-1.145	-1.38	-1.84	-0.92	-0.81	-0.95	-1.14	-1.22
5127	hSQ029195	|| PCTK1 || PCTAIRE protein kinase 1 || Hs.496068 || NM_033018 || || 5127 || hHR010947 || 1428442	0.43	0.3	0.47	-0.34	0.19	0.65	0.37	0.29	-0.31	-0.4	0.31	-0.94	0.35	-0.03	0.195	0.18	-0.01	-0.6	-0.12	-0.82	0.65	-0.91
10715	hSQ037762	|| LASS1 || LAG1 longevity assurance homolog 1 (S. cerevisiae) || Hs.412355 || || || 10715 || hHR020924 || 1428472	2.19	2.06	1.87	1.42	2.03	1.62	2.4	2.38	1.72	1.44	2.25	1.32	1.38	1.22	2.085	2.1	1.91	0.82	-0.22	-0.61	2.06	0.24
6191	hSQ018338	|| RPS4X || Ribosomal protein S4, X-linked || Hs.446628 || NM_001007 || || 6191 || hHR026643 || 1428496	0.73	0.8	0.29	0.5	0.82	0.32	1	0.64	0.79	-1.19	1.57	1.01	0.99	0.97	0.235	0.04	0.59	0.17	-0.25	0.91	-3.58e-09	0.02
390498	hSQ013301	|| || || || XM_497418 || || || hHR029238 || 1428537	0.8	0.75	-0.02	0.03	0.54	0.61	1.84	1.96	2.4	2.06	1.75	0.85	0.94	1.77	0.715	0.84	-0.18	0.05	0.11	0.73	0.33	1.11
55621	hSQ018525	|| TRMT1 || TRM1 tRNA methyltransferase 1 homolog (S. cerevisiae) || Hs.515169 || NM_017722 || || 55621 || hHR026858 || 1428567	-0.25	-0.33	-0.29	-0.4	-0.28	-0.62	-0.08	0.06	-0.34	-0.23	-0.04	-1.11	-0.67	-0.73	-0.885	-0.6	-1.41	-1.41	-1.04	-0.86	0.39	0.42
387914	hSQ018290	|| TMEM46 || Transmembrane protein 46 || Hs.433791 || NM_001007538 || || 387914 || hHR003926 || 1428590	-0.91	-0.74	-0.43	-0.43	-0.23	-0.26	-0.7	-0.28	-0.19	0.33	-0.5	-0.23	-0.44	-0.21	-0.355	-0.43	-0.73	-0.54	-1.26	-0.97	-0.59	-0.73
375258	hSQ014182	|| RGPD5 || RANBP2-like and GRIP domain containing 5 || Hs.469630 || BC020901 || || 84220 || hHR030536 || 1428605	-0.76	-0.28	-0.92	-0.97	-0.3	0.09	-0.7	-1.11	-1.64	-1.42	-1.92	-0.95	-0.55	-0.02	0.575	0.4	0.12	0.38	0.76	0.15	0.04	-0.75
55845	hSQ016313	|| C3orf10 || Chromosome 3 open reading frame 10 || Hs.649307 || NM_018462 || || 55845 || hHR025182 || 1428680	-0.47	-0.45	-0.39	-0.79	-0.23	-0.57	0.96	1.12	1.6	1.18	0.85	0.1	0.53	0.07	1.645	1.56	0.52	0.23	0.7	0.77	0.84	1.52
5529	hSQ032688	|| PPP2R5E || Protein phosphatase 2, regulatory subunit B', epsilon isoform || Hs.334868 || NM_006246 || || 5529 || hHR023940 || 1428736	-0.1	0.1	-0.45	-0.02	-0.02	0.1	-1.11	-1.19	-0.78	-1.36	-0.71	-0.02	-0.48	-0.34	-0.655	-0.35	0.13	0.49	0.76	0.53	0.29	0.51
25994	hSQ036321	|| HIGD1A || HIG1 domain family, member 1A || Hs.7917 || NM_014056 || || 25994 || hHR029408 || 1428761	-1.57	-1.45	-0.86	-1.42	-0.76	-0.87	0.6	0.21	0.81	0.77	0.19	0.23	-0.2	1.3	0.485	0.75	0.88	0.33	0.89	0.68	0.11	1.61
57701	hSQ042441	|| KIAA1602 || KIAA1602 || Hs.143067 || AB046822 || || 57701 || hHR024402 || 1428813	2.79	2.82	2.35	1.58	1.1	0.91	1.94	2.08	1.06	0.78	1.83	0.74	1.37	-0.35	1.705	1.57	1.11	0.05	-0.02	-0.9	0.68	-0.7
346950	hSQ004829	|| || || || XM_294473 || || || hHR028866 || 1428822	-0.77	-0.5	-0.28	-0.85	-0.16	-0.02	1.09	0.85	1.39	1.33	0.6	-0.04	0.12	1.05	-0.535	-0.41	-1.92	-1.46	-0.61	-0.22	-1.53	-0.15
441906	hSQ040195	|| HIST2H3D || Histone cluster 2, H3d || Hs.528615 || XM_497711 || || 653604 || hHR030722 || 1428840	-0.36	-0.43	-0.51	-0.52	-0.24	-0.17	0.54	0.38	0.66	0.65	0.61	-0.12	0.08	0.69	-0.395	-0.29	-0.09	-0.05	0.19	0.14	0.96	-0.62
3309	hSQ030217	|| HSPA5 || Heat shock 70kDa protein 5 (glucose-regulated protein, 78kDa) || Hs.605502 || NM_005347 || || 3309 || hHR012678 || 1428844	0.05	0.05	-0.37	-0.8	-0.06	-0.22	0.32	0.54	-0.74	-0.92	-0.76	-0.82	0.43	-1.54	-0.945	-1.2	-3.53	-2.18	-1.24	-2.07	-1.75	-2.52
64093	hSQ035728	|| SMOC1 || SPARC related modular calcium binding 1 || Hs.497349 || NM_022137 || || 64093 || hHR019577 || 1428920	0.26	0.19	0.52	-0.01	-0.1	-0.54	-0.81	-0.57	-0.95	-0.88	-1.2	-0.83	-0.11	-1.64	-1.735	-1.83	-2.33	-2.1	-1.26	-1.32	-0.99	-1.23
9787	hSQ034642	|| DLG7 || Discs, large homolog 7 (Drosophila) || Hs.77695 || NM_014750 || || 9787 || hHR003506 || 1428957	0.23	0.4	-0.86	-1.25	0.52	0.18	0.05	0.02	-0.03	0.3	-0.57	0.21	0.24	0.59	-0.255	-0.58	0.02	0.37	0.45	1.02	-0.15	0.01
389203	hSQ025638	|| LOC389203 || Hypothetical gene supported by BC032431 || Hs.479386 || BC032431 || || 389203 || hHR007160 || 1428975	-2.15	-1.65	-0.38	-0.73	-0.48	-0.48	-0.78	-0.78	-0.47	-0.06	-1.59	-0.8	-0.76	0.39	-1.135	-0.81	-1.45	-1.56	0.1	-0.31	-2.15	-0.22
3608	hSQ034718	|| ILF2 || Interleukin enhancer binding factor 2, 45kDa || Hs.75117 || NM_004515 || || 3608 || hHR024566 || 1429006	1.32	0.99	0.41	0.6	0.79	0.74	0.78	0.96	0.92	0.93	1.3	0.8	1.07	0.38	-0.505	-0.68	-0.24	-0.05	0.24	1.32	0.55	1.33
284184	hSQ030127	|| LOC284184 || Hypothetical LOC284184 || Hs.356545 || BC079831 || || 284184 || hHR027206 || 1429030	-0.51	-0.58	-0.17	-0.32	-0.15	-0.34	0.75	0.5	1.04	0.66	0.18	-0.85	-0.09	-0.14	0.625	0.47	-0.72	-0.83	-0.75	-0.5	-0.55	-0.23
387522	hSQ028942	|| || ubiquitin-conjugating enzyme E2 variant 1 || Hs.420529 || || || || hHR029121 || 1429089	1.57	1.7	1.36	0.81	1.8	2.18	2.53	2.29	1.79	2.03	1.12	1.27	1.57	1.32	0.865	0.74	0.67	0.26	0.78	0.57	-0.1	1.59
1822	hSQ038373	|| ATN1 || Atrophin 1 || Hs.143766 || NM_001007026 || || 1822 || hHR001483 || 1429098	3.97	3.98	2.5	2.03	2.47	2.64	2.43	2.83	1.28	1.54	2.1	1.69	2.03	0.25	1.945	2.2	1.34	0.31	0.33	-0.86	0.93	0.23
9260	hSQ043227	|| || || || NM_203353 || || || hHR028571 || 1429128	2.11	1.83	2.48	1.75	1.69	1.7	1.74	1.79	1.76	2	2.27	0.95	0.87	1.15	1.025	1.26	0.27	0.3	-0.69	-0.64	1.03	1.66
3251	hSQ019369	|| HPRT1 || Hypoxanthine phosphoribosyltransferase 1 (Lesch-Nyhan syndrome) || Hs.412707 || NM_000194 || || 3251 || hCM000970 || 1429146	-1.83	-1.77	-1.69	-1.74	-1.42	-1.33	0.4	0.18	0.87	1.1	-0.45	-0.57	-0.43	0.33	0.515	0.32	0.91	0.37	0.78	0.58	0.05	0.19
1837	hSQ034266	|| DTNA || Dystrobrevin, alpha || Hs.643454 || NM_001390 || || 1837 || hHR003844 || 1429164	-0.59	-0.61	-0.93	-1.16	-0.74	-0.86	-0.95	-1.19	-1.08	-0.94	-1.17	-0.74	-0.15	-1.57	0.425	0.24	0.72	0.55	0.5	0.32	-0.19	-0.48
8459	hSQ030383	|| TPST2 || Tyrosylprotein sulfotransferase 2 || Hs.632768 || NM_001008566 || || 8459 || hHR011056 || 1429204	-0.09	0.01	0.04	-0.35	0.21	0.3	0.98	0.87	0.88	1.08	0.8	0.17	0.48	0.58	1.255	1.17	1.54	0.84	0.49	-0.02	1.03	-0.01
388753	hSQ027776	|| C1orf31 || Chromosome 1 open reading frame 31 || Hs.23198 || NM_001012985 || || 388753 || hHR002675 || 1429221	-1.74	-1.64	-0.56	-1.51	-0.78	-0.99	0.35	-0.16	-0.08	0.1	-0.82	-0.88	-0.04	0.52	-1.825	-1.58	-1.83	-2.45	-0.7	-0.65	-2.34	-0.36
440231	hSQ026852	|| || || || XM_496035 || || || hHR031209 || 1429314	0.01	0.24	0.05	0.06	0.04	0.07	1.46	1.11	0.74	0.52	0.49	-0.34	0.02	0.01	-0.275	-0.29	-1.2	-1.14	-1.16	-1.02	-0.69	-2.46
3030	hSQ013739	|| HADHA || Hydroxyacyl-Coenzyme A dehydrogenase/3-ketoacyl-Coenzyme A thiolase/enoyl-Coenzyme A hydratase (trifunctional protein), alpha subunit || Hs.516032 || NM_000182 || || 3030 || hHR020156 || 1429330	-0.41	-0.44	-0.11	-0.54	-0.04	0.01	-0.74	-0.53	-0.89	-0.76	-0.97	-0.91	-0.04	-0.56	-0.755	-0.73	-1.69	-2.2	-0.33	-0.24	-0.6	0.63
9135	hSQ020247	|| RABEP1 || Rabaptin, RAB GTPase binding effector protein 1 || Hs.592121 || NM_004703 || || 9135 || hHR026912 || 1429337	0.75	0.94	0.36	0.13	0.78	1.03	0.58	0.61	0.57	0.38	0.22	0.48	0.76	0.74	0.095	0.14	-0.13	0.1	0.26	-0.24	-0.24	-0.55
51119	hSQ044311	|| SBDS || Shwachman-Bodian-Diamond syndrome || Hs.110445 || NM_016038 || || 51119 || hHR028744 || 1429349	-0.92	-0.69	-0.82	-1.1	-0.59	-0.62	0.63	0.5	0.39	0.72	-0.5	-0.36	0.1	-0.49	-0.735	-0.56	-0.16	-0.55	0.45	0.26	-0.68	0.16
440667	hSQ021723	|| || || Hs.631793 || || || || hHR031885 || 1429421	-0.96	-1.09	-0.76	-1.08	-0.48	-0.28	0.48	0.18	0.04	-0.03	0.74	-1.04	0.03	0.29	0.695	0.8	0.18	-0.57	-0.23	-0.61	0.52	-0.02
11152	hSQ044935	|| WDR45 || WD repeat domain 45 || Hs.632807 || NM_007075 || || 11152 || hHR029962 || 1429427	-0.67	-0.67	-0.07	-0.42	-0.38	-0.37	0.63	0.81	0.78	0.95	0.4	-0.69	0.3	-8.94e-10	1.835	1.77	0.98	0.55	0.5	0.32	1.25	1.46
9446	hSQ044783	|| GSTO1 || Glutathione S-transferase omega 1 || Hs.190028 || NM_004832 || || 9446 || hHR008107 || 1429443	0.63	0.71	0.66	0.24	1.11	1.25	1.48	1.43	0.84	1.05	1.04	1.16	1.24	1.9	0.235	0.3	-0.05	-0.21	0.36	0.75	-0.71	0.99
131691	hSQ029793	|| || || || NC_000003 || || || hHR029358 || 1429478	-0.81	-0.84	-0.07	-0.25	0.05	-0.53	0.71	0.72	0.95	1.34	0.58	0.03	-0.08	0.72	1.175	0.56	0.77	0.34	0.2	0.72	0.53	2.16
9686	hSQ027376	|| VGLL4 || Vestigial like 4 (Drosophila) || Hs.373959 || NM_014667 || || 9686 || hHR016899 || 1429525	-1.02	-0.83	-0.72	-1.23	-0.95	-0.89	-0.87	-0.7	-0.85	-0.95	-1.04	-0.88	-0.36	-1.06	0.655	0.3	1.18	0.84	0.73	0.58	1	0.81
6510	hSQ001172	|| SLC1A5 || Solute carrier family 1 (neutral amino acid transporter), member 5 || Hs.631582 || NM_005628 || || 6510 || hHR027080 || 1429552	1.18	1.04	1.44	0.42	-0.02	0.52	1.48	1.41	1.35	1.24	1.59	-0.26	0.67	-0.34	2.195	2.22	1.38	0.75	0.37	0.11	1.52	1.7
23683	hSQ037029	|| PRKD3 || Protein kinase D3 || Hs.646803 || NM_005813 || || 23683 || hHR002227 || 1429572	-0.34	0.03	-0.8	-0.94	-0.39	-0.14	-1.03	-1.04	-0.83	-0.49	-0.95	-0.49	-0.68	-0.11	-0.065	-0.21	-0.14	0.01	0.66	0.24	-0.19	-1.21
6389	hSQ008835	|| SDHA || Succinate dehydrogenase complex, subunit A, flavoprotein (Fp) || Hs.440475 || NM_004168 || || 6389 || hCM000885 || 1429680	0.17	0.15	-0.21	-0.28	-0.72	-0.78	0.61	0.53	-0.16	0.24	0.13	-0.71	0.43	-0.42	-0.765	-0.77	-0.92	-0.72	0.75	0.49	-3.58e-09	0.48
389787	hSQ015135	|| || || || XM_497072 || || || hHR027787 || 1429685	-1.42	-1.34	-0.29	-1.34	-0.87	-0.68	0.68	0.45	0.2	0.87	-0.4	-0.44	-0.04	0.82	-0.905	-0.65	-0.86	-0.64	0.4	0.17	-1.34	1.3
6389	hSQ038017	|| SDHA || Succinate dehydrogenase complex, subunit A, flavoprotein (Fp) || Hs.440475 || NM_004168 || || 6389 || hCM000837 || 1429761	0.2	0.18	-0.16	-0.48	-0.48	-0.76	0.26	0.4	-0.01	0.21	0.11	-0.72	0.33	-0.44	-0.955	-0.95	-1.02	-0.65	0.52	0.42	0.18	0.51
402196	hSQ020726	|| || || || XM_497991 || || || hHR029070 || 1429791	-0.24	-0.17	0.07	-0.04	-0.12	-0.15	1.08	1.03	0.72	0.69	0.54	-0.1	0.25	0.23	0.595	0.01	0.14	-0.25	-0.37	-0.7	-0.6	0.73
3251	hSQ021309	|| HPRT1 || Hypoxanthine phosphoribosyltransferase 1 (Lesch-Nyhan syndrome) || Hs.412707 || NM_000194 || || 3251 || hCM000993 || 1429882	-1.68	-1.66	-1.57	-1.47	-1.29	-1.26	0.45	0.48	0.97	1.03	-0.07	-0.41	-0.47	0.34	0.585	0.49	1.06	0.68	0.97	0.82	0.26	0.6
401848	hSQ000514	|| || || || XM_497504 || || || hHR027969 || 1429885	0.36	0.16	0.88	0.4	-0.05	0.1	-0.07	-0.5	-1.11	-3.52	0.48	-0.67	-0.06	-0.06	-0.475	-0.22	-0.47	-0.52	0.19	-0.06	0.89	2.17
374666	hSQ014647	|| || || || NM_199163 || || || hHR031594 || 1429896	-2	-1.42	-1.47	-1.58	-1.93	-1.37	-0.53	-0.22	-1.09	-1.08	-0.94	-1.96	-0.68	-2.19	-0.455	-0.47	-2.08	-1.97	-0.3	-1.47	-0.51	-1.75
567	hSQ002555	|| B2M || Beta-2-microglobulin || Hs.693631 || NM_004048 || || 567 || hCM000862 || 1429908	-1.27	-1.37	-1.46	-1.45	-0.89	-0.88	0.38	0.26	0.87	1	0.35	0.12	-0.47	1.35	0.285	0.4	0.55	0.27	0.3	0.98	0.28	-0.31
391035	hSQ041608	|| || || || XM_372778 || || || hHR029722 || 1429916	-1.26	-1.32	-0.39	-0.94	-0.25	0.02	-0.06	-0.56	-0.27	0.28	-1.05	-0.69	-0.95	0.82	-0.515	-0.9	-1.09	-1.24	-0.04	0.2	-1.22	0.42
55750	hSQ040365	|| AGK || Acylglycerol kinase || Hs.654751 || NM_018238 || || 55750 || hHR027315 || 1429939	0.74	0.6	0.38	0.32	0.35	0.54	-0.37	-0.53	-0.47	-0.77	0.94	0.25	0.49	0.11	-0.115	0.04	0.32	0.05	0.07	0.48	0.56	0.9
391656	hSQ030393	|| LOC391656 || Similar to ribosomal protein S15a || Hs.667746 || XM_373027 || || 391656 || hHR029227 || 1429981	-1.67	-1.57	-1.15	-1.4	-0.72	-0.65	0.67	0.34	0.56	0.76	-0.13	-0.58	-0.45	0.87	0.195	0.1	-0.38	-0.6	0.21	0.27	-0.73	0.49
369	hSQ034817	|| ARAF || V-raf murine sarcoma 3611 viral oncogene homolog || Hs.446641 || NM_001654 || || 369 || hHR022348 || 1430053	2.85	2.6	2.62	1.9	2.21	1.8	1.74	1.56	1.2	1.42	1.45	1.24	1.62	0.8	1.115	1.08	0.72	0.44	0.28	0.45	1.07	2.57
8030	hSQ029821	|| CCDC6 || Coiled-coil domain containing 6 || Hs.591360 || NM_005436 || || 8030 || hHR026958 || 1430055	0.77	0.87	0.02	0.29	0.83	0.67	-0.13	-0.09	-0.41	-0.58	-0.4	0.12	-0.07	0.04	-0.875	-1.06	-0.72	-0.69	-0.55	-0.08	-0.01	-0.95
440085	hSQ001998	|| || || || XM_495911 || || || hHR030540 || 1430066	-0.97	-0.89	-1.14	-1.44	-0.63	-0.57	0.6	-0.07	-0.84	-1.02	-0.66	-1.16	-0.3	0.07	-3.225	-3.17	-3.7	-3.57	-2.51	-2.27	-2.83	-2.63
9987	hSQ031592	|| || || || NM_005463 || || || hHR026159 || 1430073	0.03	0.12	0.05	-0.22	0.16	0.19	0.19	0.62	0.43	0.54	-0.21	-0.05	0.2	0.73	-0.895	-1.08	-1.44	-0.27	-0.78	-0.78	-0.2	-0.34
23788	hSQ022102	|| MTCH2 || Mitochondrial carrier homolog 2 (C. elegans) || Hs.269944 || NM_014342 || || 23788 || hHR011535 || 1430152	-0.82	-0.67	-0.58	-0.99	-0.66	-0.76	-0.71	-0.67	-0.22	0.05	-0.93	-0.33	-0.2	-0.48	-0.235	-0.6	0.34	-0.09	-0.01	-0.73	-0.59	-0.07
175	hSQ042868	|| AGA || Aspartylglucosaminidase || Hs.207776 || NM_000027 || || 175 || hHR008178 || 1430171	-0.28	-0.21	-0.47	-0.59	-0.57	-0.44	0.27	0.64	0.78	0.5	0.2	0.02	0.29	0.24	1.235	1	1.22	1.28	1.22	0.63	0.75	0.24
439964	hSQ010096	|| || || || || || || hHR032098 || 1430176	-0.61	-0.75	-0.4	0.01	0.06	0.29	0.63	-0.29	0.37	0.08	0.61	-0.33	-0.16	0.48	0.615	0.45	-0.23	-0.35	-0.75	-0.98	0.56	-0.21
10385	hSQ032803	|| BTN2A2 || Butyrophilin, subfamily 2, member A2 || Hs.373938 || NM_006995 || || 10385 || hHR027656 || 1430193	-0.48	-0.56	-0.68	-1.15	-1.32	-1.25	-0.46	-0.32	-1.02	-0.9	-1.41	-1.28	-0.03	-1.58	-0.715	-0.88	-1.48	-1.32	0.08	-0.26	-0.86	-0.5
388476	hSQ039319	|| || || || XM_371117 || || || hHR024200 || 1430223	-1.39	-1.15	-0.03	-0.57	-0.82	0.09	0.88	0.48	-0.04	0.33	-0.63	-0.7	0.17	-0.15	-1.265	-0.88	-1.93	-0.93	-0.08	-0.23	-1.59	-0.65
91219	hSQ039585	|| || || || NM_080924 || || || hHR031355 || 1430236	0.46	0.12	0.97	0.72	0.8	0.72	-0.69	-1.58	-1.43	-4.07	1.78	0.09	-0.34	0.66	1.625	1.56	1.61	0.59	0.04	0.24	1.79	1.63
285190	hSQ022096	|| RGPD4 || RANBP2-like and GRIP domain containing 4 || Hs.512050 || BX537861 || || 285190 || hHR030712 || 1430287	-0.48	-0.3	-0.87	-0.97	-0.02	-0.15	-1.06	-1.26	-1.23	-1.08	-1.74	-0.82	-1.14	-0.1	0.065	-0.21	-0.14	0.16	0.29	0.22	0.2	-0.45
245908	hSQ007481	|| DEFB105A || Defensin, beta 105A || Hs.381378 || NM_152250 || || 245908 || hHR028934 || 1430310	0.2	0.21	0.38	0.32	0.7	0.75	1.24	1.1	1.22	1.42	1.09	0.84	0.35	1.05	-0.525	-0.36	-0.02	-0.03	-0.55	-0.62	-0.26	-0.36
3251	hSQ001054	|| HPRT1 || Hypoxanthine phosphoribosyltransferase 1 (Lesch-Nyhan syndrome) || Hs.412707 || NM_000194 || || 3251 || hCM000790 || 1430347	-1.76	-1.71	-1.66	-1.61	-1.39	-1.5	0.32	0.27	1.06	1.22	-0.23	-0.49	-0.37	0.38	0.665	0.39	1.12	0.52	0.93	0.67	0.27	0.18
4218	hSQ027903	|| RAB8A || RAB8A, member RAS oncogene family || Hs.642874 || NM_005370 || || 4218 || hHR008311 || 1430375	0.16	0.33	0.89	0.32	0.72	0.69	1.04	1.05	0.22	0.58	-0.06	-0.25	0.66	0.26	0.365	0.35	0.28	-0.05	0.31	0.15	-0.18	1.1
23358	hSQ010993	|| USP24 || Ubiquitin specific peptidase 24 || Hs.477009 || AL832370 || || 23358 || hHR004848 || 1430382	0.08	0.3	-0.48	-0.68	0.17	-0.2	-1.62	-1.83	-0.99	-0.94	-1.31	-0.89	-0.75	-0.94	0.035	-0.25	-0.19	0.13	0.33	-0.29	-0.15	-1.13
131076	hSQ042653	|| CCDC58 || Coiled-coil domain containing 58 || Hs.220594 || BC062725 || || 131076 || hHR029572 || 1430448	-1.15	-1.2	-0.86	-1.4	-1.15	-0.98	0.62	0.53	0.41	0.33	0.09	-0.25	-0.16	0.37	-0.285	0	-0.24	-0.16	0.01	-0.34	-0.47	0.21
114991	hSQ020416	|| ZNF618 || Zinc finger protein 618 || Hs.349208 || BC036039 || || 114991 || hHR010745 || 1430449	-0.47	-0.5	-1.1	-1.16	-0.85	-1.71	-1.27	-1.54	-2.35	-2.09	-2.03	-1.72	-1.24	-2.94	-1.605	-1.95	-2.12	-2.04	-1.47	-1.52	-1.27	-1.87
10965	hSQ042518	|| ACOT2 || Acyl-CoA thioesterase 2 || Hs.446685 || NM_006821 || || 10965 || hHR027276 || 1430511	-0.32	-0.14	1.07	0.34	0.31	0.39	0.32	0.21	0.64	1.05	-0.09	-0.21	0.36	0.73	0.875	1.11	0.92	0.62	0.9	0.56	0.69	1.3
81853	hSQ031535	|| TMEM14B || Transmembrane protein 14B || Hs.273077 || NM_030969 || || 81853 || hHR029109 || 1430536	-1.5	-1.44	-1.06	-1.28	-1.04	-1.08	0.43	0.18	0.74	0.75	-0.18	-0.44	-0.15	0.61	0.575	0.55	0.15	-0.16	0.04	-0.21	-0.45	0.69
23578	hSQ009589	|| PEF1 || Penta-EF-hand domain containing 1 || Hs.470417 || NM_012392 || || 553115 || hHR028468 || 1430553	0.23	0.25	0.57	0.15	0.07	0.11	0.8	1	0.9	1.33	0.6	2.98e-09	0.23	-0.17	1.525	1.51	1.47	0.64	0.56	0.69	1.17	2.79
5387	hSQ003014	|| PMS2L3 || Postmeiotic segregation increased 2-like 3 || Hs.659871 || NM_005395 || || 5387 || hHR028576 || 1430591	0.47	0.28	0.27	0.35	0.62	0.36	0.57	0.65	0.72	0.99	0.64	0.06	0.15	0.7	0.005	0.15	0.09	-0.36	-0.3	0.18	0.23	0.5
567	hSQ008799	|| B2M || Beta-2-microglobulin || Hs.693631 || NM_004048 || || 567 || hCM000963 || 1430601	-1.36	-1.53	-1.3	-1.14	-0.71	-1.03	0.48	0.03	0.73	0.67	0.14	-0.08	-0.56	1.2	0.285	0.09	0.53	0.3	0.27	0.76	0.13	-0.89
694	hSQ022050	|| BTG1 || B-cell translocation gene 1, anti-proliferative || Hs.255935 || NM_001731 || || 694 || hHR015364 || 1430623	0.27	0.37	0.41	0.14	0.18	0.35	0.34	0.24	0.81	0.97	0.19	-0.13	0.29	0.49	1.585	1.31	2.27	1.97	1.38	1.45	1.85	0.96
219854	hSQ011047	|| LOC219854 || Hypothetical protein LOC219854 || Hs.7626 || AK091324 || || 219854 || hHR003855 || 1430626	-0.47	-0.49	0.33	-0.19	-0.51	-0.6	0.5	0.12	1.02	0.99	0.55	-0.05	0.37	0.56	1.115	0.76	0.14	-0.15	-0.3	-0.44	0.03	-0.08
84259	hSQ025080	|| DCUN1D5 || DCN1, defective in cullin neddylation 1, domain containing 5 (S. cerevisiae) || Hs.503716 || NM_032299 || || 84259 || hHR008854 || 1430628	-0.64	-0.49	-0.57	-0.76	0.05	0.07	1.15	1.23	1.3	1.49	0.89	0.34	0.45	1.48	0.925	0.86	1.18	0.7	0.52	0.41	0.74	0.7
389873	hSQ030066	|| || || || XM_372233 || || || hHR029758 || 1430662	-0.54	-0.4	0.01	-0.15	-0.15	0.06	-0.92	-0.44	-0.32	-0.67	-1.16	-0.48	-0.31	-0.68	-0.865	-0.68	-0.9	-1.03	-0.21	-0.4	-0.02	-0.13
90381	hSQ038669	|| C15orf42 || Chromosome 15 open reading frame 42 || Hs.441708 || NM_152259 || || 90381 || hHR011068 || 1430664	1.28	1.19	0.26	-0.04	0.56	0.89	-0.05	0.09	-0.44	-0.44	-0.56	-0.61	0.13	-1.07	1.735	1.46	1.91	1.22	1.47	0.81	2.15	1.41
2934	hSQ026846	|| GSN || Gelsolin (amyloidosis, Finnish type) || Hs.522373 || NM_198252 || || 2934 || hCT000652 || 1430691	-0.8	-0.89	-0.17	-0.37	-1.33	-1.31	-0.16	-0.25	-0.44	-0.04	-0.65	-1.23	-0.43	-1.21	-0.275	-0.26	-0.86	-1.38	-0.66	-1.13	-0.41	0.15
57584	hSQ041532	|| ARHGAP21 || Rho GTPase activating protein 21 || Hs.524195 || NM_020824 || || 57584 || hHR029179 || 1430711	0.51	0.58	-0.39	-0.22	-0.3	0.08	-0.8	-1	-1.27	-0.69	-1.88	-0.9	-1.01	-0.3	-1.835	-1.22	-1.18	-1.28	-0.21	-0.66	-0.88	-0.5
29894	hSQ025996	|| CPSF1 || Cleavage and polyadenylation specific factor 1, 160kDa || Hs.493202 || NM_013291 || || 29894 || hHR025090 || 1430716	0.44	0.44	-0.21	-0.31	-0.4	-0.43	0.17	-0.1	-0.43	-0.48	0.27	-0.86	0.23	-1.07	-0.665	-0.26	-0.62	-1.23	-0.16	-0.73	0.86	0.03
10480	hSQ024002	|| PCID1 || PCI domain containing 1 (herpesvirus entry mediator) || Hs.502244 || NM_006360 || || 10480 || hHR014487 || 1430717	-0.49	-0.27	-0.41	-0.51	0.28	0.37	0.54	0.47	0.48	1.22	0.14	0.62	0.1	1.22	-0.345	0	0.44	0.19	0.59	1.03	-0.52	1.3
342538	hSQ011606	|| NACA2 || Nascent polypeptide-associated complex alpha subunit 2 || Hs.591178 || NM_199290 || || 342538 || hHR029285 || 1430757	-0.11	-0.08	-0.92	-1.18	-0.48	-0.33	2.08	1.95	0.8	1.04	0.45	0.06	1	0.65	-0.915	-0.67	-1.5	-1.75	-0.29	-0.43	-2.36	-0.42
389049	hSQ031303	|| || || || XM_371569 || || || hHR028736 || 1430807	0.01	-0.17	0.41	-0.14	0.09	0.02	-0.28	-0.59	-1.11	-2.8	0.97	-0.76	-0.24	0.3	0.505	1	0.99	-0.29	0.1	0.1	1.16	1.99
5216	hSQ007153	|| PFN1 || Profilin 1 || Hs.494691 || NM_005022 || || 5216 || hHR028097 || 1430830	1.64	1.35	2.21	1.02	1.35	1.28	1.66	1.93	1.86	2.16	1.68	1.32	0.88	1.28	1.115	1.19	0.44	0.27	-0.34	0.44	0.81	2.8
220885	hSQ012846	|| RPSAP15 || Ribosomal protein SA pseudogene 15 || Hs.496451 || AF284768 || || 220885 || hHR030585 || 1430832	-0.23	-0.19	0.27	-0.23	0.23	0.24	1.12	0.98	1.33	1.33	0.91	0.39	0.39	1.49	1.485	1.66	1.36	0.71	1.01	1.24	1.24	1.82
84455	hSQ024285	|| KIAA1799 || KIAA1799 protein || Hs.652324 || AB058702 || || 84455 || hHR007702 || 1430835	0.39	0.51	-0.86	-0.75	0.04	-0.06	0.9	1.04	0.71	0.68	0.53	0.27	0.53	0.09	0.885	0.92	1.08	0.92	1.52	1.31	0.6	0.52
60496	hSQ042588	|| AASDHPPT || Aminoadipate-semialdehyde dehydrogenase-phosphopantetheinyl transferase || Hs.524009 || NM_015423 || || 60496 || hHR026227 || 1430851	-0.85	-0.75	-0.93	-1.11	-0.46	-0.59	-0.43	-0.21	-0.06	0.49	-0.8	-0.36	-0.2	0.59	-0.125	-0.28	-0.18	-0.14	0.45	0.25	-0.97	0.19
6164	hSQ015145	|| RPL34 || Ribosomal protein L34 || Hs.438227 || NM_033625 || || 6164 || hHR003171 || 1430943	-1.36	-1.29	-0.69	-1.31	-1.1	-0.82	0.72	0.43	0.22	0.49	-0.2	-0.32	-0.74	0.17	0.175	0.02	0.14	-0.11	0.36	0.39	-0.63	0.94
23052	hSQ003689	|| ENDOD1 || Endonuclease domain containing 1 || Hs.167115 || AB020637 || || 23052 || hHR014865 || 1430953	-1.13	-1.07	-0.75	-0.79	-1.14	-1.15	-1.44	-1.23	-0.78	-1	-1.53	-0.85	-0.41	-1.26	-1.775	-1.68	-1.05	-1.41	-0.56	-0.77	-1.23	-0.69
5929	hSQ039410	|| RBBP5 || Retinoblastoma binding protein 5 || Hs.519230 || NM_005057 || || 5929 || hHR006891 || 1430966	0.38	0.52	0.14	0.84	1.17	1.23	-1.34	-3.31	-3.23	-4.93	-0.92	0.06	-1.14	-0.86	-1.985	-1.12	-2.78	0.21	-0.6	-0.1	-0.81	1.07
57523	hSQ033417	|| KIAA1305 || KIAA1305 || Hs.288348 || AB037726 || || 57523 || hHR011715 || 1430968	1.46	1.33	0.39	-0.05	0.31	0.13	0.28	0.14	-0.57	-0.52	-0.39	-0.42	0.52	-1.58	0.515	0.2	0.13	0.24	-0.14	-0.79	-0.51	0.54
442621	hSQ005610	|| || || || XM_499364 || || || hHR031307 || 1430973	-0.54	-0.77	-1.32	-1.13	-1.25	-0.79	-2.34	-2.28	-2.92	-4.04	-0.71	-1.27	0.37	-0.87	-2.675	-2.6	-2.75	-2.82	-0.28	0.29	-1.64	-1.72
6169	hSQ045506	|| RPL38 || Ribosomal protein L38 || Hs.380953 || NM_000999 || || 6169 || hHR022682 || 1431016	0.83	0.72	0.69	-0.12	0.51	0.56	1.68	1.94	1.69	1.73	1.45	0.74	0.65	1.4	0.075	0.51	-0.4	-0.47	-0.53	0.09	-0.47	1.35
5683	hSQ035892	|| PSMA2 || Proteasome (prosome, macropain) subunit, alpha type, 2 || Hs.333786 || NM_002787 || || 5683 || hHR009540 || 1431076	-1.3	-1.22	-1.1	-1.14	-0.74	-0.68	0.68	0.75	1.04	1.07	0.55	-0.01	-0.11	0.64	0.165	0.32	0.33	-0.03	0.16	-0.01	-0.01	0.13
440916	hSQ039629	|| || || || XM_498913 || || || hHR028346 || 1431092	0.56	0.5	1.22	0.46	0.94	0.95	1.01	0.84	1.7	1.64	1.42	0.72	0.19	1.11	1.345	1.05	0.75	-0.07	-1.34	-0.51	0.24	-0.38
85379	hSQ034631	|| CTA-221G9.4 || KIAA1671 protein || Hs.655843 || AB051458 || || 85379 || hHR012864 || 1431094	-0.91	-0.74	-1.33	-1.41	-0.65	-0.67	-1.12	-1.28	-1.64	-1.36	-1.99	-1.1	-0.83	-1.47	0.325	0.25	0.04	0.21	0.28	0.06	0.24	-0.02
442528	hSQ036911	|| || || || XM_499275 || || || hHR016173 || 1431113	-2.5	-2.52	-1.35	-0.91	-1.67	-2.05	0.14	-0.1	-1.01	-0.87	-0.81	-1.29	-0.38	-2.55	-1.315	-1.4	-2.21	-1.9	-0.09	-0.53	-1.47	0.18
23406	hSQ043852	|| COTL1 || Coactosin-like 1 (Dictyostelium) || Hs.289092 || NM_021149 || || 23406 || hHR025616 || 1431119	0.86	0.86	1.16	1.03	0.95	1.06	1.02	1.2	1.39	1.33	0.58	0.25	0.97	0.38	-0.015	0.09	-0.37	-0.7	-0.42	-0.57	0.06	0.72
664	hSQ044990	|| BNIP3 || BCL2/adenovirus E1B 19kDa interacting protein 3 || Hs.144873 || NM_004052 || || 664 || hHR029524 || 1431161	-0.28	-0.32	-0.05	-0.21	-0.06	-0.21	0.79	0.97	0.92	0.92	0.23	-0.08	0.29	0.12	-0.085	0.01	0.23	-0.04	0.06	0.02	-0.24	1.12
51290	hSQ045342	|| ERGIC2 || ERGIC and golgi 2 || Hs.339453 || NM_016570 || || 51290 || hHR010578 || 1431164	-1.2	-1.13	-1.08	-1.37	-0.84	-0.5	0.47	0.42	0.22	0.39	-0.25	-0.16	-0.28	0.35	-0.445	-0.32	-0.03	-0.17	0.63	0.64	-0.88	0.08
55672	hSQ011173	|| NBPF1 || Neuroblastoma breakpoint family, member 1 || Hs.515947 || BC086308 || || 55672 || hHR029611 || 1431197	-1.02	-0.82	-0.75	-1.2	-0.82	-0.65	-1.25	-1.36	-1.61	-1.62	-2.41	-1.85	-1.09	-1.19	0.105	0.03	-0.08	-0.2	0.44	-0.18	-0.5	-0.78
150051	hSQ018555	|| || || || XM_097792 || || || hHR014218 || 1431254	0.38	0.51	0.4	-0.14	0.39	0.74	0.9	0.87	0.77	0.69	1.04	0.05	0.1	0.95	1.375	1.52	1.35	0.47	0.61	0.04	1	0.31
27433	hSQ016348	|| || || || NM_130459 || || || hHR017576 || 1431268	0.76	0.49	0.63	-0.14	-0.1	0.03	1.51	1.31	1.23	1.36	1.05	-0.11	0.57	0.66	1.975	1.92	1.77	1.35	0.64	0.68	1.7	1.93
127295	hSQ010120	|| || || || || || || hHR028530 || 1431303	-0.55	-0.84	-0.16	-0.77	-0.65	-0.5	0.71	0.27	-0.1	0.18	-0.24	-0.87	-0.67	-0.57	-0.905	-0.82	-1.49	-2.05	-1.06	-1.01	-1.31	-0.74
9551	hSQ023345	|| ATP5J2 || ATP synthase, H+ transporting, mitochondrial F0 complex, subunit F2 || Hs.521056 || NM_004889 || || 9551 || hHR024998 || 1431408	0.16	-0.12	0.46	0.04	0.39	0.22	2.03	2.05	2.04	1.97	1.67	0.4	0.23	1.04	1.065	0.69	0.09	0.05	-0.35	0.08	-0.07	1.42
800	hSQ010706	|| CALD1 || Caldesmon 1 || Hs.490203 || NM_033138 || || 800 || hHR002768 || 1431413	-0.24	-0.06	-0.58	-0.67	0.27	0.21	0.81	1.02	-0.77	-0.74	-1.15	-0.39	-0.12	0.1	-1.575	-1.77	-1.61	-1.72	-0.9	-1.25	-1.71	-1.42
6159	hSQ037740	|| RPL29 || Ribosomal protein L29 || Hs.425125 || NM_000992 || || 6159 || hHR026740 || 1431450	-0.23	-0.47	-0.31	-0.52	0.61	0.19	1.46	1.35	1.5	1.07	0.97	0.41	0.63	1.07	0.905	1.01	0.32	-0.19	-0.62	0.28	-0.23	1.47
1915	hSQ036375	|| EEF1A1 || Eukaryotic translation elongation factor 1 alpha 1 || Hs.586423 || NM_001402 || || 1915 || hHR031147 || 1431468	-0.82	-0.35	0.51	-0.46	0.05	0.01	0.38	0.14	0.11	0.57	-0.66	-0.02	-0.05	1.19	-0.365	-0.31	-0.71	-1.12	0.31	0.2	-2.41	-0.13
3251	hSQ021315	|| HPRT1 || Hypoxanthine phosphoribosyltransferase 1 (Lesch-Nyhan syndrome) || Hs.412707 || NM_000194 || || 3251 || hCM001041 || 1431515	-1.82	-1.8	-1.27	-1.4	-0.96	-1.09	-0.12	-0.23	0.62	0.91	-0.32	-0.67	-0.55	0.26	0.105	-0.07	0.62	0.03	0.65	0.74	-0.02	0.37
441454	hSQ010321	|| || || || XM_499153 || || || hHR028788 || 1431539	-0.76	-0.44	0.65	-0.43	0.04	0.55	0.71	0.6	-0.86	-0.17	-1.36	-0.96	-0.15	-0.25	-2.975	-2.64	-4.2	-2.92	-2.07	-1.93	-3.32	-1.27
9179	hSQ023791	|| AP4M1 || Adaptor-related protein complex 4, mu 1 subunit || Hs.632317 || NM_004722 || || 9179 || hHR012502 || 1431557	-0.09	0.01	0.58	0.39	0.08	0.42	0.17	-0.03	0.33	0.08	0.23	-0.6	-0.04	-0.16	1.175	1.29	1.69	1.14	0.87	0.4	1.25	-0.07
55486	hSQ015709	|| PARL || Presenilin associated, rhomboid-like || Hs.478469 || NM_018622 || || 55486 || hHR021047 || 1431568	-1	-0.91	-0.3	-0.76	-0.32	-0.25	-0.55	-0.44	-0.31	0.04	-0.79	-0.65	0.14	0.2	-0.225	-0.27	-0.34	-0.14	0.89	0.58	-0.13	0.85
3840	hSQ001006	|| KPNA4 || Karyopherin alpha 4 (importin alpha 3) || Hs.288193 || NM_002268 || || 3840 || hHR029898 || 1431576	-0.65	-0.44	-0.65	-0.8	-0.78	-0.71	-0.13	-0.3	-0.11	-0.23	-0.95	-0.46	0.41	-0.13	0.025	0.28	0.06	0.09	0.82	0.32	-0.01	1.31
140901	hSQ045355	|| STK35 || Serine/threonine kinase 35 || Hs.100057 || NM_080836 || || 140901 || hHR019234 || 1431598	1.11	1.26	0.74	0.34	0.68	0.72	0.92	0.95	0.63	0.82	0.48	-0.06	0.86	-0.45	0.795	0.74	0.29	0.26	0.22	-0.04	0.19	1.04
51602	hSQ002026	|| NOP5/NOP58 || Nucleolar protein NOP5/NOP58 || Hs.471104 || NM_015934 || || 51602 || hHR023716 || 1431605	-1.48	-1.44	-2.16	-2.71	-1.89	-2.03	0.67	0.54	-1.1	-0.77	-1.73	-1.59	-0.64	-3.97	-1.835	-1.95	-1.84	-2.53	-0.26	-0.42	-2.92	-0.79
387547	hSQ019078	|| || || || AJ576270 || || || hHR032083 || 1431622	2.26	1.89	1.16	0.71	1.25	1.44	1.58	1.45	1.36	1.2	1.64	0.76	1.06	0.58	1.265	1.05	1.17	0.97	0.98	0.24	0.84	0.23
339456	hSQ013587	|| TMEM52 || Transmembrane protein 52 || Hs.123423 || NM_178545 || || 339456 || hHR022779 || 1431723	-0.2	-0.48	0.38	0.07	0.08	-0.26	0.75	0.72	0.82	0.79	0.25	-0.04	-0.33	-0.66	1.385	1.37	1	0.08	-0.3	-0.15	0.33	1.8
6637	hSQ005503	|| SNRPG || Small nuclear ribonucleoprotein polypeptide G || Hs.516076 || NM_003096 || || 6637 || hHR028212 || 1431733	-1.69	-1.61	-0.36	-0.69	-0.17	0.09	0.3	0.01	0.81	1.09	-0.2	-0.06	-0.01	0.94	-0.645	-0.7	-1.36	-1.32	-0.47	-0.42	-1.6	0.72
388499	hSQ011676	|| || || || XM_496286 || || || hHR029472 || 1431840	1.3	1.42	1.72	1.13	1.12	1.67	0.96	0.75	1.07	1.12	1.13	0.53	0.65	0.22	1.285	1.33	1.04	0.98	0.48	0.53	0.96	2.07
6880	hSQ024932	|| TAF9 || TAF9 RNA polymerase II, TATA box binding protein (TBP)-associated factor, 32kDa || Hs.653163 || NM_003187 || || 6880 || hHR027830 || 1431859	-1.2	-1.12	-0.84	-0.93	-0.43	-0.59	0.9	0.46	0.67	0.84	0.2	0.22	0.06	1.01	0.235	0.64	0.1	-0.1	0.67	0.53	-0.36	1.25
1329	hSQ001472	|| COX5B || Cytochrome c oxidase subunit Vb || Hs.1342 || NM_001862 || || 1329 || hHR026494 || 1431934	0.18	0.15	0.21	0.24	0.55	0.65	1.23	1.3	1.48	1.32	1.22	0.42	0.13	0.9	0.875	0.73	0.28	-0.05	-0.38	0.36	0.45	0.39
29057	hSQ023260	|| TMEM29 || Transmembrane protein 29 || Hs.653131 || NM_014138 || || 29057 || hHR030376 || 1432051	-1.4	-1.28	-1.32	-1.44	-1.48	-1.8	-0.91	-1.02	-1.23	-0.96	-1.39	-2.31	-0.76	-2.53	-1.685	-1.75	-2.19	-2.55	-1.69	-2.34	-1.25	-1.85
57109	hSQ020787	|| REXO4 || REX4, RNA exonuclease 4 homolog (S. cerevisiae) || Hs.438409 || NM_020385 || || 57109 || hHR031623 || 1432093	0.18	0.2	-0.11	-0.38	0.2	0.05	0.34	0.18	-0.39	-0.41	-0.21	-0.3	0.64	-0.74	-0.865	-1.09	-1.32	-1.64	0.11	-0.42	-0.18	-0.57
6799	hSQ008403	|| SULT1A2 || Sulfotransferase family, cytosolic, 1A, phenol-preferring, member 2 || Hs.546304 || NM_177528 || || 6799 || hHR029183 || 1432174	-0.9	-0.99	-0.86	-1.08	-1.55	-2.16	-0.21	-1	-1.46	-1.78	-0.98	-1.69	-1.42	-1.97	0.725	0.32	0.53	-0.5	0.68	0.33	1.37	1.11
3845	hSQ041731	|| KRAS || V-Ki-ras2 Kirsten rat sarcoma viral oncogene homolog || Hs.505033 || NM_033360 || || 3845 || hHR026891 || 1432241	-1.53	-1.31	-0.87	-1.1	-0.88	-0.23	-1.59	-1.17	-0.8	-0.59	-2.17	-0.7	-0.76	0.24	-0.515	-0.46	-0.91	-0.2	-0.19	-0.19	-0.47	-0.51
567	hSQ028904	|| B2M || Beta-2-microglobulin || Hs.693631 || NM_004048 || || 567 || hCM001011 || 1432244	-1.24	-1.39	-0.84	-0.91	-0.53	-0.77	0.07	-0.22	0.66	0.85	0.17	0.2	-0.65	1.13	-0.265	-0.17	0.22	0.2	0.07	0.97	0.11	-0.46
515	hSQ028506	|| || || || NM_001002014 || || || hHR003962 || 1432266	0.84	1.07	0.59	0.25	1.43	1.61	1.38	1.3	0.94	1.23	1.05	0.98	0.94	1.31	-0.275	-0.56	-0.18	0.04	-0.35	-0.11	-0.65	-1.11
567	hSQ002553	|| B2M || Beta-2-microglobulin || Hs.693631 || NM_004048 || || 567 || hCM001064 || 1432279	-1.28	-1.3	-1.84	-1.56	-1.29	-0.78	0.76	0.59	0.89	1.02	0.35	0.03	-0.31	1.64	0.705	0.6	0.81	0.56	0.39	0.86	0.07	-0.93
6507	hSQ011539	|| SLC1A3 || Solute carrier family 1 (glial high affinity glutamate transporter), member 3 || Hs.481918 || NM_004172 || || 6507 || hHR008032 || 1432350	-0.92	-0.79	-0.81	-0.95	-0.34	-0.53	-0.58	-0.62	-0.63	-0.52	-1	-0.29	-0.12	-0.93	0.115	0.12	0.18	-0.07	0.28	-0.06	-0.18	0.13
6659	hSQ000068	|| SOX4 || SRY (sex determining region Y)-box 4 || Hs.643910 || NM_003107 || || 6659 || hHR003180 || 1432392	-0.68	-0.49	-0.21	-0.52	-0.24	0.01	-1.24	-1.5	-1.3	-1.17	-1.93	-0.71	-0.75	-0.21	-0.215	-0.24	-0.69	-0.24	0.18	-0.44	-1.07	-0.49
8517	hSQ009167	|| IKBKG || Inhibitor of kappa light polypeptide gene enhancer in B-cells, kinase gamma || Hs.43505 || NM_003639 || || 8517 || hHR032184 || 1432397	0.37	0.2	0.65	0.04	0.12	-0.11	0.96	0.9	0.95	0.36	1.04	-0.77	0.3	-0.14	0.835	1.05	0.11	-0.24	-0.21	-0.37	0.98	0.27
55605	hSQ009036	|| KIF21A || Kinesin family member 21A || Hs.374201 || NM_017641 || || 55605 || hHR006867 || 1432407	0.85	0.96	-0.3	-0.23	0.38	0.42	0.18	0.35	0.23	-0.07	-0.34	0.11	-0.29	0.61	-0.085	-0.23	-0.51	0.08	0.27	-0.17	-0.02	0.27
81876	hSQ029418	|| RAB1B || RAB1B, member RAS oncogene family || Hs.300816 || NM_030981 || || 81876 || hHR031383 || 1432439	1.76	1.56	2.03	0.89	1.47	1.31	1.79	2.24	1.9	1.84	2.55	1.76	0.83	1.14	1.905	1.54	1.37	0.34	0.04	0.4	1.6	3.11
441207	hSQ016115	|| || || || || || || hHR027073 || 1432455	4.67	4.4	3.12	1.18	3.52	3.8	3.26	2.87	2.22	1.97	2.83	3.28	2.43	2.56	1.595	1.77	2.56	2.09	0.33	0.94	1.94	1.68
65260	hSQ019058	|| C1orf163 || Chromosome 1 open reading frame 163 || Hs.584966 || NM_023077 || || 65260 || hHR012821 || 1432539	-1.16	-1.16	-1.08	-0.99	-0.78	-1.04	-1.1	-0.79	-0.97	-1.05	-1.15	-0.56	-0.51	-0.82	-1.995	-2.06	-2.09	-0.81	-0.68	-0.42	-1.28	0.02
11113	hSQ028209	|| CIT || Citron (rho-interacting, serine/threonine kinase 21) || Hs.119594 || NM_007174 || || 11113 || hHR004773 || 1432559	0.79	0.79	0.09	-0.25	-0.44	-0.32	-0.32	-0.03	-1.04	-1.4	-0.94	-1.16	-0.61	-0.89	0.745	0.52	-0.22	-0.2	0.43	-0.31	0.1	-0.07
10772	hSQ011137	|| FUSIP1 || FUS interacting protein (serine/arginine-rich) 1 || Hs.3530 || NM_054016 || || 10772 || hHR030947 || 1432733	-0.87	-0.55	-0.26	-0.73	-0.2	0.09	-0.53	-0.56	-0.39	0.36	-1.26	-0.75	-0.28	-0.02	0.085	0.13	-0.18	0.04	0.63	0.16	-0.33	0.65
1452	hSQ025356	|| CSNK1A1 || Casein kinase 1, alpha 1 || Hs.654547 || NM_001892 || || 1452 || hHR028521 || 1432767	-0.35	-0.2	-0.4	-0.62	-0.33	-0.01	0.11	-0.09	0.69	0.69	0.07	-0.07	0.14	0.89	0.335	0.22	0.67	0.91	0.74	0.51	0.43	0.55
55666	hSQ037903	|| NPLOC4 || Nuclear protein localization 4 homolog (S. cerevisiae) || Hs.464333 || NM_017921 || || 55666 || hHR019983 || 1432814	0.78	0.69	0.26	-0.31	0.51	0.4	0.03	-0.2	0.08	-0.07	0.22	-0.47	0.41	-0.15	1.075	0.7	1.01	0.95	0.8	0.1	1.45	1.16
1317	hSQ039914	|| SLC31A1 || Solute carrier family 31 (copper transporters), member 1 || Hs.532315 || NM_001859 || || 1317 || hHR026038 || 1432840	-0.1	-0.18	7.15e-09	-0.61	-0.33	-0.22	-0.46	-0.33	-0.24	-0.27	-0.28	-0.38	0.2	-0.52	0.455	0.3	0.14	0.37	0.19	-0.1	0.49	-0.31
54478	hSQ036488	|| FAM64A || Family with sequence similarity 64, member A || Hs.592116 || NM_019013 || || 54478 || hHR029697 || 1432845	-0.31	-0.24	-0.24	-0.56	-0.06	-0.16	0.9	0.77	0.77	0.68	0.65	-0.31	0.13	0.55	0.785	1.12	0.81	0.09	0.19	-0.15	1.17	-0.53
6605	hSQ001514	|| SMARCE1 || SWI/SNF related, matrix associated, actin dependent regulator of chromatin, subfamily e, member 1 || Hs.547509 || NM_003079 || || 6605 || hHR002752 || 1432899	-0.45	-0.12	-0.29	-0.81	-0.16	0.18	0.32	0.42	-1.35	-1.2	-1.57	-0.89	-0.08	-0.52	-1.735	-1.93	-2.37	-1.99	-0.43	-0.95	-1.78	-0.51
567	hSQ002554	|| B2M || Beta-2-microglobulin || Hs.693631 || NM_004048 || || 567 || hCM001034 || 1432997	-1.27	-1.44	-1.24	-1.13	-0.78	-0.82	-0.04	-0.04	0.42	0.73	0.27	-0.06	-0.73	0.97	-0.175	-0.05	0.08	-0.15	-0.03	1.01	0.11	-0.24
285855	hSQ028629	|| RPL7L1 || Ribosomal protein L7-like 1 || Hs.520133 || NM_198486 || || 285855 || hHR029792 || 1433029	-0.44	-0.36	0.26	-0.11	-0.09	-0.01	-0.19	-0.9	-0.73	-1.4	-0.66	-0.41	-0.7	-0.8	-0.895	-0.85	-0.89	-0.38	-0.11	-0.3	-0.87	-0.42
23062	hSQ028365	|| GGA2 || Golgi associated, gamma adaptin ear containing, ARF binding protein 2 || Hs.460336 || NM_015044 || || 23062 || hHR011528 || 1433088	1.82	1.71	1.27	1.08	1.21	1.3	1.54	1.68	1.04	0.99	1.67	0.88	1.25	0.65	0.595	0.41	0.58	0.71	0.16	0.2	0.35	1.17
347549	hSQ006424	|| || || || XM_497110 || || || hHR032252 || 1433137	3.12	3.27	2.83	1.94	2.01	2.59	0.66	0.8	0.74	0.72	1.14	1.01	1.28	0.29	0.705	0.51	0.21	-0.1	-0.29	-0.27	0.95	0.57
2175	hSQ008695	|| FANCA || Fanconi anemia, complementation group A || Hs.567267 || NM_000135 || || 2175 || hHR016964 || 1433178	-0.7	-0.66	-1.26	-1.15	-0.6	-0.63	-1.82	-1.68	-2.4	-2.92	-1.96	-1.73	-0.96	-1.68	-0.485	-0.51	-0.5	-0.89	-0.07	-0.58	0.33	-1.21
5464	hSQ004896	|| PPA1 || Pyrophosphatase (inorganic) 1 || Hs.437403 || NM_021129 || || 5464 || hHR028289 || 1433245	-1.26	-1.1	-0.73	-1.26	-0.56	-0.77	-0.47	-0.58	-0.16	0.32	-0.88	0.21	-0.35	0.7	-0.495	-0.53	-0.44	-0.49	0.12	0.45	-1.23	0.67
51263	hSQ005675	|| MRPL30 || Mitochondrial ribosomal protein L30 || Hs.590896 || NM_145212 || || 51263 || hHR027821 || 1433338	0.29	0.25	-0.16	-0.33	-0.03	-0.28	0.55	0.7	0.52	0.79	0.51	-0.06	0.05	-0.26	-0.105	-0.3	-0.28	-1	-0.35	-0.27	-0.43	0.13
84365	hSQ024125	|| MKI67IP || MKI67 (FHA domain) interacting nucleolar phosphoprotein || Hs.367842 || NM_032390 || || 84365 || hHR009609 || 1433412	-0.15	-0.09	-0.11	-0.5	0.03	0.08	1.69	1.43	0.71	0.94	0.54	0.13	0.75	0.67	0.815	0.57	0.31	0.04	0.75	0.4	-0.65	0.68
6652	hSQ032026	|| SORD || Sorbitol dehydrogenase || Hs.878 || NM_003104 || || 6652 || hHR030990 || 1433472	-0.2	-0.01	0.49	0.12	0.21	-0.01	0.07	0.15	0.45	0.84	-0.43	-0.06	0.43	-0.01	-0.435	-0.57	-0.77	-0.95	-0.24	-0.3	-1.14	1.55
391075	hSQ010241	|| || || || XM_497702 || || || hHR025810 || 1433504	-0.45	-0.68	0.28	0.13	-0.05	-0.05	-0.45	-0.49	0.29	-2.37	1.02	-0.07	-0.13	-0.04	0.855	0.51	0.91	0.26	-0.46	0.32	0.83	1.74
5389	hSQ008006	|| KIAA1505 || KIAA1505 protein || Hs.113940 || U38980 || || 57639 || hHR028550 || 1433507	0.46	0.39	0.72	0.59	0.55	0.25	1.27	1.13	1.72	1.84	1.29	0.69	0.42	0.78	0.595	0.43	0.71	0.31	-0.11	0.37	0.41	0.34
153396	hSQ014277	|| TMEM161B || Transmembrane protein 161B || Hs.379972 || NM_153354 || || 153396 || hHR027914 || 1433533	-1.49	-1.41	-1.1	-0.97	-0.92	-1.17	-0.56	-0.25	0.19	0.41	-0.95	-0.14	-0.95	-0.3	0.665	0.42	0.94	0.69	0.63	0.73	0.47	1.04
1509	hSQ017325	|| CTSD || Cathepsin D || Hs.654447 || NM_001909 || || 1509 || hCT000580 || 1433572	1.05	0.6	0.97	0.05	0.49	0.41	-3.16	-3.72	-2.94	-3.01	1.57	-0.41	-0.41	0.58	0.305	1.21	0.57	-0.35	-1.1	-0.39	1.14	0.58
135521	hSQ015931	|| || || || NM_001011510 || || || hHR029740 || 1433579	-0.59	-0.62	0.29	-0.35	-0.33	-0.27	0.08	0.19	0.22	0.94	-1.2	-0.62	0.01	-0.54	1.065	1.08	0.33	0.16	-0.2	-0.18	-0.04	1.91
58527	hSQ009487	|| C6orf115 || Chromosome 6 open reading frame 115 || Hs.600861 || AF116682 || || 58527 || hHR011009 || 1433584	-0.87	-0.78	-0.25	-0.81	-0.13	-0.74	1.14	1	1.4	1.48	0.57	0.62	0.36	1.02	0.055	-0.12	-0.37	-0.61	-0.52	-0.47	-0.94	0.68
6144	hSQ003318	|| RPL21 || Ribosomal protein L21 || Hs.381123 || NM_000982 || || 6144 || hHR031734 || 1433604	-1.2	-1.08	-0.9	-1.67	-0.86	-0.87	0.48	0.21	0.32	0.51	-0.96	-0.77	-0.4	0.58	-1.375	-0.88	-2.49	-2.05	-0.1	0.13	-2.27	1.02
283459	hSQ031358	|| SFRS9 || Splicing factor, arginine/serine-rich 9 || Hs.369624 || BC034962 || || 8683 || hHR006350 || 1433611	-1.28	-1.35	-1.63	-2.36	-1.92	-2.19	-1.97	-1.94	-1.98	-1.69	-2.05	-2.1	-0.95	-2.62	-2.095	-2.44	-2.15	-2.37	-0.84	-1.73	-2.21	-1.51
546	hSQ032460	|| || || || NM_138271 || || || hHR031087 || 1433665	-0.05	-0.02	-0.7	-0.63	-0.62	-0.71	-0.71	-0.3	-0.89	-0.85	-1.8	-0.98	-1.05	-0.43	0.355	0.11	-0.22	-0.53	0.24	-0.34	-0.14	-0.88
400470	hSQ014575	|| || || || || || || hHR029257 || 1433673	0.07	-0.26	0.46	0.18	0.67	0.42	0.57	0.45	0.73	-0.88	1.36	0.13	-0.34	0.1	1.435	1.61	1.62	0.64	-0.11	0.15	1.88	2.09
125150	hSQ002052	|| ZSWIM7 || Zinc finger, SWIM-type containing 7 || Hs.593985 || AK093384 || || 125150 || hHR020084 || 1433695	-0.92	-0.87	-1.07	-1.55	-2.04	-1.91	1.29	1.22	-0.1	0.14	-0.58	-1.73	0.19	-1.72	-0.655	-0.77	-1.18	-1.42	-0.07	-0.62	-0.85	-0.54
8106	hSQ038836	|| PABPN1 || Poly(A) binding protein, nuclear 1 || Hs.117176 || NM_004643 || || 8106 || hHR030561 || 1433746	-0.23	-0.35	0.26	-0.5	-0.69	-0.49	-0.25	-0.24	-0.56	-0.75	-1.14	-1.83	-0.71	-2.04	0.095	-0.08	-0.08	-0.83	0.48	-0.69	-0.09	0.14
60485	hSQ023182	|| SAV1 || Salvador homolog 1 (Drosophila) || Hs.642842 || NM_021818 || || 60485 || hHR007630 || 1433748	-1.02	-0.85	-0.51	-1.18	-0.7	-0.9	-0.76	-0.69	-0.64	-0.5	-1.74	-0.97	-0.59	-1.08	-0.085	-0.05	-0.19	-0.13	0.65	0.06	-0.51	0.41
57162	hSQ044592	|| PELI1 || Pellino homolog 1 (Drosophila) || Hs.7886 || NM_020651 || || 57162 || hHR003161 || 1433861	-0.85	-0.52	-0.02	-0.03	0.47	0.4	-0.17	-0.66	-0.51	-0.14	-0.06	-0.15	-0.26	-0.08	-0.185	-0.09	-0.21	0.07	0.6	0.63	0.09	0.83
8694	hSQ041996	|| || || || NM_012079 || || || hHR032140 || 1433867	-0.33	-0.56	0.62	0.05	-0.33	-0.53	-0.03	-0.1	0.15	0.11	-0.03	-0.68	-0.66	-0.79	1.175	1.02	0.68	-0.12	-0.45	-0.39	1.03	1.75
7430	hSQ040174	|| VIL2 || Villin 2 (ezrin) || Hs.693594 || NM_003379 || || 7430 || hHR013481 || 1433891	0.66	0.8	0.43	-0.39	0.47	0.52	0.41	0.62	-0.8	-0.83	-0.61	-0.63	0.2	-0.57	-0.295	-0.43	-0.34	-0.67	-0.2	-0.52	-0.43	0.58
7703	hSQ016678	|| PCGF2 || Polycomb group ring finger 2 || Hs.371617 || NM_007144 || || 7703 || hHR016845 || 1433917	3.45	3.4	2.68	2.1	2.71	2.68	3.15	3.11	2.39	2.25	2.37	2.02	2.21	1.69	1.485	1.59	0.9	0.69	0.64	0.52	1.31	2.21
388460	hSQ002414	|| || || || XM_371107 || || || hHR031389 || 1433938	1.37	1.6	1.46	0.89	2.1	2.21	2.42	2.34	1.34	1.6	1.36	1.55	2.2	2.31	-1.365	-0.64	-1.59	-1.9	0.07	0.2	-1.62	0.5
282617	hSQ004233	|| IL28B || Interleukin 28B (interferon, lambda 3) || Hs.406744 || NM_172139 || || 282617 || hHR028882 || 1433972	-0.21	0.17	0.52	-0.14	0.18	0.57	1.13	0.67	0.7	0.97	0.36	0.28	0.12	0.66	-0.595	-0.5	-0.91	-1.09	-0.44	-0.24	-0.49	-0.43
343295	hSQ014195	|| || || || XM_497684 || || || hHR026436 || 1434009	-0.96	-1	-1.22	-1.94	-0.93	-1.11	-1.06	-1.23	-1.48	-2.29	-1.24	-1.22	-0.23	-1.62	-2.335	-2.28	-2.44	-2.33	-0.57	-0.36	-1.91	-0.17
57460	hSQ015796	|| PPM1H || Protein phosphatase 1H (PP2C domain containing) || Hs.435479 || AB032983 || || 57460 || hHR012800 || 1434030	0.2	0.29	-0.44	-0.36	-0.34	-0.11	-0.08	-0.03	-0.44	-0.46	-0.97	-0.45	0.12	-0.7	-0.685	-0.57	-0.86	-0.41	-0.36	-0.76	-0.87	-0.95
27258	hSQ036210	|| LSM3 || LSM3 homolog, U6 small nuclear RNA associated (S. cerevisiae) || Hs.111632 || NM_014463 || || 27258 || hHR028342 || 1434037	1.19	1.3	0.6	0.22	1.35	1.64	2.89	3.27	2.39	2.45	1.86	1.6	2.31	2.39	0.115	0.33	-1.03	-0.83	-0.04	0.03	-0.83	-0.4
4291	hSQ041089	|| MLF1 || Myeloid leukemia factor 1 || Hs.85195 || NM_022443 || || 4291 || hHR007179 || 1434112	0.56	0.6	0.56	0.57	0.96	1.02	1.95	2.03	1.18	1.53	1.34	1.6	0.87	1.34	-0.455	-0.36	0.06	-0.49	0.02	0.3	-0.4	0.35
4299	hSQ023049	|| AFF1 || AF4/FMR2 family, member 1 || Hs.480190 || NM_005935 || || 4299 || hHR029603 || 1434133	0.03	0.04	0.25	-0.51	-0.18	0.08	-0.53	-0.24	-0.23	-0.22	-0.79	-0.76	-0.31	-0.57	0.135	0.06	-0.32	-0.04	0.13	-0.27	-0.31	0.24
401305	hSQ036504	|| || similar to beta-1,4-mannosyltransferase || Hs.632634 || || || || hHR028415 || 1434204	-0.42	-0.34	0.92	0.54	0.58	0.35	0.59	0.45	1.15	1.19	0.72	0.11	0.25	0.44	1.445	1.41	1.43	0.9	0.42	1.14	1.25	1.76
118424	hSQ044693	|| UBE2J2 || Ubiquitin-conjugating enzyme E2, J2 (UBC6 homolog, yeast) || Hs.191987 || NM_194458 || || 118424 || hHR005126 || 1434260	-0.81	-0.7	-0.34	-0.39	-0.24	0.02	-0.21	-0.63	-0.64	-0.6	-0.76	-1.21	-0.78	-1.28	0.025	-0.11	0.71	0.08	-0.05	-0.64	0.59	-0.9
10890	hSQ013068	|| RAB10 || RAB10, member RAS oncogene family || Hs.467960 || NM_016131 || || 10890 || hHR025883 || 1434268	-0.05	0.36	0.39	0.63	1.2	1.22	-0.6	-0.68	0.09	0.47	-0.41	0.3	-0.14	1.21	-0.695	-0.52	-0.74	0.09	0.16	0.03	-0.3	0.92
391581	hSQ036095	|| || || || XM_497940 || || || hHR028586 || 1434269	1.01	1.11	1.71	0.95	1.8	1.63	1.58	1.47	1.41	2.31	0.7	0.99	0.6	1.74	-0.795	-0.68	-1.93	-1.4	-0.78	0.14	-1.98	0.24
6675	hSQ038938	|| UAP1 || UDP-N-acteylglucosamine pyrophosphorylase 1 || Hs.492859 || NM_003115 || || 6675 || hHR022097 || 1434287	-0.49	-0.33	-0.77	-1.1	-0.67	-0.72	0.31	0.37	0.32	0.33	-9.54e-09	-0.07	0.21	0.24	0.075	-0.11	0.16	0.23	0.2	-0.22	-0.01	0.09
3145	hSQ040266	|| HMBS || Hydroxymethylbilane synthase || Hs.82609 || NM_000190 || || 3145 || hCM000982 || 1434289	-0.27	-0.21	-0.26	-0.29	-0.18	-0.2	1.03	0.74	0.7	0.8	0.71	-0.55	0.03	0.73	0.925	0.73	0.76	0.23	0.06	0.08	1.06	0.05
90557	hSQ029111	|| CCDC74A || Coiled-coil domain containing 74A || Hs.351461 || NM_138770 || || 90557 || hHR030430 || 1434295	-0.8	-0.9	-0.38	-0.9	-0.58	-0.6	0.77	1.35	0.4	0.58	-0.19	-0.91	-0.39	-0.26	-0.215	-0.08	-0.14	-1.31	-0.28	-0.44	0.26	1.14
283747	hSQ041748	|| || || || AC016134 || || || hHR029687 || 1434307	-2	-1.89	-1.12	-1.62	-1.11	-0.87	-0.19	-0.3	0.39	0.57	-0.63	-0.72	-0.4	0.71	-0.025	0.07	0.1	0.08	0.48	0.22	-0.09	0.63
34	hSQ011054	|| ACADM || Acyl-Coenzyme A dehydrogenase, C-4 to C-12 straight chain || Hs.445040 || NM_000016 || || 34 || hHR003910 || 1434315	-1.45	-1.15	-0.93	-1.33	-0.61	-0.64	-0.34	-0.43	-0.03	0.07	-1.15	-0.42	-0.58	0.18	-0.725	-0.35	-0.22	-0.53	0.5	0.65	-0.68	1.1
390183	hSQ011626	|| || || || XM_495875 || || || hHR027300 || 1434356	-0.45	-0.29	0.18	-0.37	0.21	-0.1	1.02	0.88	0.9	1.17	0.29	-0.2	0.51	0.64	0.165	0	-0.1	-0.24	0.49	0.52	-0.65	1.28
4277	hSQ017068	|| MICB || MHC class I polypeptide-related sequence B || Hs.211580 || NM_005931 || || 4277 || hHR006412 || 1434392	0.58	0.5	0.76	0.41	1.08	0.75	0.97	1.12	0.22	0.61	0.24	0.13	0.68	-0.19	1.235	0.97	0.96	0.78	0.69	0.72	1.02	1.84
25869	hSQ014939	|| || || || AC012349 || || || hHR028684 || 1434457	0.93	1	-0.28	-0.02	0.95	1.06	0.6	0.66	0.26	0.66	-0.16	0.53	0.25	0.8	-1.775	-1.5	-1.2	-0.73	-0.27	-0.29	-0.7	-0.06
567	hSQ002562	|| B2M || Beta-2-microglobulin || Hs.693631 || NM_004048 || || 567 || hCM001090 || 1434501	-1.54	-1.58	-1.46	-1.17	-0.94	-0.59	0.43	-0.15	0.7	0.83	0.11	2.98e-09	-0.53	1.57	0.255	0.34	0.53	0.05	-0.2	0.97	0.14	-0.18
388237	hSQ025110	|| LOC388237 || Similar to kidney-specific protein (KS) || Hs.534667 || XM_370958 || || 388237 || hHR031913 || 1434550	-0.09	-0.31	-1.25	-2.12	-2.07	-1.73	-1.06	-0.96	-1.9	-2.07	-1.54	-2.72	-0.94	-2.9	-0.095	-0.2	-0.16	-0.81	0.32	-0.15	0.05	0.34
5202	hSQ028545	|| PFDN2 || Prefoldin subunit 2 || Hs.492516 || NM_012394 || || 5202 || hHR014685 || 1434582	-0.2	-0.15	-0.23	-0.78	-0.41	-0.4	1.27	1.33	-0.09	0.09	-0.13	-0.93	0.47	-0.27	-2.235	-2.32	-3.48	-3.97	-1.89	-1.48	-2.32	-0.92
3032	hSQ021962	|| HADHB || Hydroxyacyl-Coenzyme A dehydrogenase/3-ketoacyl-Coenzyme A thiolase/enoyl-Coenzyme A hydratase (trifunctional protein), beta subunit || Hs.534639 || NM_000183 || || 3032 || hHR016120 || 1434725	0.03	0.06	-0.21	-0.43	0.01	-0.44	1.4	1.47	0.77	1.23	0.4	0.44	0.45	0.19	0.385	0.55	0.27	-0.2	0.36	0.58	-0.19	1.27
3251	hSQ012437	|| HPRT1 || Hypoxanthine phosphoribosyltransferase 1 (Lesch-Nyhan syndrome) || Hs.412707 || NM_000194 || || 3251 || hCM000840 || 1434749	-1.69	-1.6	-1.37	-1.36	-0.91	-1.22	-0.24	-0.06	0.85	1	-0.42	-0.5	-0.44	0.18	0.085	-0.11	0.72	0.18	0.78	0.67	0.22	0.59
11158	hSQ035063	|| RABL2B || RAB, member of RAS oncogene family-like 2B || Hs.584862 || NM_001003789 || || 11158 || hHR030183 || 1434759	1.34	1.36	1.59	1.01	1.51	1.62	1.96	1.84	1.58	1.65	0.86	0.46	1.62	0.63	0.885	0.65	1.08	0.11	0.2	-0.04	0.49	0.93
8898	hSQ026193	|| MTMR2 || Myotubularin related protein 2 || Hs.181326 || NM_201278 || || 8898 || hHR008474 || 1434776	0.04	0.05	-0.33	-0.3	0.06	-0.14	-0.54	-0.48	0.28	0.42	-0.04	0.34	-0.15	-0.31	-0.665	-0.82	-0.08	0.03	2.24e-10	-0.03	0.13	0.46
2776	hSQ012949	|| GNAQ || Guanine nucleotide binding protein (G protein), q polypeptide || Hs.269782 || NM_002072 || || 2776 || hHR030273 || 1434789	0.94	0.98	0.36	0.55	0.49	0.42	-1.4	-1.63	-1.77	-1.93	-0.98	-0.32	-0.36	-0.61	-0.535	-0.64	-0.54	0.49	0.62	0.12	0.61	-1.22
339879	hSQ022718	|| LOC339879 || Similar to beta-1,4-mannosyltransferase || Hs.591652 || XM_291054 || || 339879 || hHR030886 || 1434890	-0.4	-0.43	0.57	0.29	0.26	-0.02	0.59	0.25	1.3	1.14	0.89	-0.01	0.3	0.74	1.835	1.77	1.84	0.97	0.74	1.03	1.66	2.05
3376	hSQ038622	|| IARS || Isoleucyl-tRNA synthetase || Hs.445403 || NM_013417 || || 3376 || hHR014287 || 1434910	0.76	0.76	-0.74	-0.39	0.27	-0.02	-0.49	-0.5	-0.22	-0.13	-0.09	0.25	0.36	0.71	-1.385	-1.48	-0.69	-0.54	0.22	0.43	-0.42	0.42
29925	hSQ034554	|| GMPPB || GDP-mannose pyrophosphorylase B || Hs.567488 || NM_013334 || || 29925 || hHR021840 || 1434936	-0.37	-0.31	0.22	-0.26	0.11	-0.04	0.47	0.28	0.37	0.08	0.67	-0.32	-0.01	0.17	0.605	0.98	0.89	0.25	0.03	-0.01	1.65	0.47
54145	hSQ039210	|| || || || NM_017445 || || || hHR031617 || 1435030	1.07	1.11	0.81	0.4	0.84	1.18	2.08	1.66	1.83	1.58	1.69	1.02	0.96	1.23	1.115	1.26	1.01	0.7	0.35	0.8	0.62	1.08
1509	hSQ010931	|| CTSD || Cathepsin D || Hs.654447 || NM_001909 || || 1509 || hCT000583 || 1435043	0.61	0.29	0.39	0.4	0.48	0.37	-1.86	-1.88	-1.96	-1.71	1.64	-0.47	-0.26	0.77	0.695	1.31	0.53	-0.25	-0.85	-0.26	1.02	0.1
60	hSQ037622	|| ACTB || Actin, beta || Hs.520640 || NM_001101 || || 60 || hCT000640 || 1435076	2.17	1.98	1.25	0.85	1.32	1.1	-4.91	-5.35	-5.11	-5.39	1.42	-0.5	-0.17	0.49	-1.015	-2.75	0.26	-0.65	-0.91	0.97	0.87	2.22
388436	hSQ044838	|| || hypothetical gene supported by BC058012 || Hs.515176 || || || || hHR029163 || 1435095	-0.58	-0.86	0.19	0.11	-0.36	-0.31	0.78	0.96	0.99	1.27	0.58	0.16	-0.1	0.44	0.865	1.06	0.84	0.77	0.14	0.32	0.57	1.11
6950	hSQ015990	|| TCP1 || T-complex 1 || Hs.363137 || NM_001008897 || || 6950 || hHR009932 || 1435098	-0.42	-0.36	0.03	-0.49	-0.31	-0.35	0.16	0.01	0.27	0.39	-0.32	-0.12	0.23	-0.04	0.375	0.46	0.64	0.46	0.77	0.55	0.22	1.03
2764	hSQ024080	|| GMFB || Glia maturation factor, beta || Hs.151413 || NM_004124 || || 2764 || hHR027414 || 1435114	-0.44	-0.4	-1.65	-1.39	-0.14	-0.13	0.26	0.26	0.81	0.55	0.28	0.46	-0.37	1.16	0.035	0.01	0.22	0.44	-0.12	0.49	0.75	-0.46
10486	hSQ028400	|| CAP2 || CAP, adenylate cyclase-associated protein, 2 (yeast) || Hs.132902 || NM_006366 || || 10486 || hHR013230 || 1435126	-0.29	-0.39	-0.26	-0.36	0.19	-0.09	-0.22	-0.21	0.48	0.67	-0.36	0.2	0.06	0.39	0.915	0.97	1.02	1.11	1.49	1.31	1.44	1.54
25845	hSQ028910	|| LOC25845 || Hypothetical LOC25845 || Hs.481464 || AK023178 || || 25845 || hHR026083 || 1435188	-0.12	-0.01	0.16	-0.01	0.43	0.42	-0.39	-0.46	-0.01	0.25	-0.49	-0.69	0.1	-0.23	0.025	0.39	0.16	-0.3	-0.04	-0.48	0.03	-0.15
3094	hSQ014434	|| HINT1 || Histidine triad nucleotide binding protein 1 || Hs.483305 || NM_005340 || || 3094 || hHR026982 || 1435207	-1.02	-1.08	-0.42	-0.92	-0.56	-0.45	1.42	1.22	1.27	1.36	0.71	0.14	-0.14	1.31	1.325	1.34	1.45	0.61	0.92	0.81	0.93	1.54
6389	hSQ038006	|| SDHA || Succinate dehydrogenase complex, subunit A, flavoprotein (Fp) || Hs.440475 || NM_004168 || || 6389 || hCM001060 || 1435210	0.33	0.16	-0.13	-0.4	-0.76	-1.28	0.37	0.31	-0.09	-0.05	0.23	-0.81	0.39	-0.75	-1.125	-1.07	-0.95	-0.69	0.46	0.29	-0.07	0.17
22826	hSQ017664	|| DNAJC8 || DnaJ (Hsp40) homolog, subfamily C, member 8 || Hs.433540 || NM_014280 || || 22826 || hHR028080 || 1435217	0.53	0.73	0.5	-0.05	0.33	0.56	2	2.32	1.05	1.07	0.67	0.07	1.46	0.39	-0.235	-0.5	-0.43	-0.27	0.53	0.37	0.26	1.17
23176	hSQ016275	|| SEPT8 || Septin 8 || Hs.533017 || AF179995 || || 23176 || hHR021146 || 1435268	0.84	0.81	0.68	0.37	0.31	0.36	0.32	0.44	0.21	0.23	-0.33	-0.21	0.33	-0.73	-0.705	-0.85	-0.75	-0.25	-0.67	-0.59	-0.5	-0.01
221017	hSQ011620	|| || || || XM_166160 || || || hHR027564 || 1435307	0.87	1.14	-0.08	0.32	0.71	0.8	2.25	2.2	0.72	0.6	0.83	0.91	1.16	0.82	-0.815	-0.6	0.25	0.1	0.86	0.26	-0.46	-0.14
170954	hSQ028772	|| KIAA1949 || KIAA1949 || Hs.101150 || AK124880 || || 170954 || hHR010431 || 1435359	2.19	2.1	2.02	1.54	1.83	1.71	1.75	2.07	1.33	1.16	1.48	0.84	1.5	0.58	1.455	1.23	1.02	0.43	0.36	0.22	1.17	1.64
1975	hSQ011474	|| EIF4B || Eukaryotic translation initiation factor 4B || Hs.648394 || NM_001417 || || 1975 || hHR031376 || 1435381	0.01	0.01	0.24	-0.35	-0.09	5.96e-10	-1.11	-0.96	-0.74	-0.8	-0.83	-0.74	0.12	-0.34	-2.145	-2.67	-3.17	-3.1	-0.84	-0.52	-1.99	-0.48
26065	hSQ043117	|| LSM14A || LSM14A, SCD6 homolog A (S. cerevisiae) || Hs.407368 || NM_015578 || || 26065 || hHR005915 || 1435439	-1.12	-0.96	-0.6	-1	-0.37	-0.53	-1.11	-1.15	-0.84	-0.77	-1.76	-0.72	-0.04	-0.3	-0.845	-1.09	-0.95	-0.94	0.06	-0.27	-0.72	0.78
11328	hSQ029666	|| FKBP9 || FK506 binding protein 9, 63 kDa || Hs.103934 || NM_007270 || || 11328 || hHR030754 || 1435446	-0.11	-0.07	0.56	-0.03	-0.24	0.17	-0.37	-0.88	-0.03	-0.04	-0.68	-0.98	0.3	-0.88	-0.935	-0.74	-1.13	-0.65	-0.42	-0.76	-0.95	0.33
5612	hSQ045509	|| PRKRIR || Protein-kinase, interferon-inducible double stranded RNA dependent inhibitor, repressor of (P58 repressor) || Hs.503315 || NM_004705 || || 5612 || hHR030023 || 1435461	0.02	0.18	-0.18	-0.5	0.3	0.19	-0.41	-0.53	0.65	0.74	-0.33	0.25	0.27	0.9	-0.065	-0.09	0.03	0.56	0.48	0.22	0.19	0.41
80273	hSQ021277	|| GRPEL1 || GrpE-like 1, mitochondrial (E. coli) || Hs.443723 || NM_025196 || || 80273 || hHR004718 || 1435492	-0.41	-0.21	0.28	-0.39	0.17	0.27	0.51	0.32	0.28	0.36	-0.61	-0.59	0.56	0.19	-0.065	-0.34	-0.6	-0.04	0.85	0.3	-0.36	0.9
26092	hSQ004839	|| TOR1AIP1 || Torsin A interacting protein 1 || Hs.496459 || NM_015602 || || 26092 || hHR003335 || 1435516	0.25	0.25	0.33	-0.25	0.82	0.71	1.01	0.99	0.71	0.89	0.17	0.41	0.38	0.95	-0.035	-0.18	0.19	0.22	0.3	0.13	0.62	0.99
515	hSQ025307	|| ATP5F1 || ATP synthase, H+ transporting, mitochondrial F0 complex, subunit B1 || Hs.514870 || NM_001688 || || 515 || hHR030218 || 1435527	0.3	0.66	0.82	0.3	1.68	1.72	1.25	1.19	0.34	1.23	1.05	1.11	0.62	1.65	-0.575	-0.42	-0.86	-0.69	0.01	0.34	-1.53	0.34
440992	hSQ041506	|| || || || XM_496668 || || || hHR029505 || 1435555	-0.64	-0.37	0.45	-0.23	0.24	0.51	1.39	0.8	1.21	1.53	0.47	0.38	0.52	2.04	0.305	0.43	0.19	-0.22	0.74	0.66	-0.5	0.73
56893	hSQ045078	|| UBQLN4 || Ubiquilin 4 || Hs.283739 || NM_020131 || || 56893 || hHR031462 || 1435570	1.13	1.16	1.36	0.84	0.98	0.95	0.9	0.76	0.64	0.46	0.52	0.07	1.11	0.46	-0.025	-0.07	-0.68	-0.84	-0.33	-0.28	0.24	0.94
10094	hSQ028348	|| ARPC3 || Actin related protein 2/3 complex, subunit 3, 21kDa || Hs.524741 || NM_005719 || || 10094 || hHR024606 || 1435603	0.03	0.01	-1.01	-0.91	-0.18	-0.5	0.82	0.87	0.72	-0.34	0.86	0.19	0.68	0.04	-0.615	-0.37	-0.84	-1.38	-0.18	0.44	-1.1	-0.14
2629	hSQ004307	|| GBA || Glucosidase, beta; acid (includes glucosylceramidase) || Hs.282997 || NM_000157 || || 2629 || hHR023044 || 1435616	0.68	0.31	0.04	-0.12	-0.02	0.05	0.22	-0.5	-0.18	-1.25	1.43	-0.05	0.01	0.01	0.615	0.69	0.62	-0.21	-0.56	-0.14	0.44	0.28
85002	hSQ016791	|| || || || NM_032916 || || || hHR029046 || 1435645	2.13	2.03	1.8	1.1	1.17	1.18	1.32	1.36	1.26	1.27	1.34	0.75	0.73	0.3	0.975	1.32	0.16	0.09	-0.15	-0.38	0.53	1.81
9908	hSQ044623	|| G3BP2 || GTPase activating protein (SH3 domain) binding protein 2 || Hs.303676 || NM_203505 || || 9908 || hHR005095 || 1435716	-0.29	-0.12	-0.72	-1.14	-0.31	5.96e-10	0.24	0.32	-0.12	0.02	-0.3	0.06	-0.04	0.89	0.855	0.75	0.92	0.92	0.58	0.29	0.55	0.68
400843	hSQ031179	|| || || || XM_378976 || || || hHR021017 || 1435828	2.22	2.28	1.94	1.52	2.33	2.38	2.68	2.74	2.48	2.5	2.31	1.61	1.86	1.81	1.535	1.35	0.93	0.12	-0.26	-0.02	0.85	1.68
7431	hSQ042398	|| VIM || Vimentin || Hs.642813 || NM_003380 || || 7431 || hCT000668 || 1435831	-0.3	-0.51	-1.02	-0.76	-0.02	-0.24	-2.62	-2.67	-1.59	-3.76	0.72	-0.37	0.02	0.36	-1.395	-0.81	-0.79	-1.6	-1.11	-0.4	0.33	0.72
441510	hSQ009098	|| || || || XM_497140 || || || hHR027366 || 1435836	0.54	0.52	0.16	-0.25	0.36	0.35	1.35	1.35	1.02	0.88	1.27	0.37	0.71	1	0.705	0.62	0.27	-0.25	-0.05	-0.04	0.63	0.47
10643	hSQ014518	|| IGF2BP3 || Insulin-like growth factor 2 mRNA binding protein 3 || Hs.648088 || NM_006547 || || 10643 || hHR029215 || 1435862	0.01	0.18	-0.17	-0.23	0.31	0.28	0.47	0.52	0.47	0.4	-0.07	0.17	0.18	0.59	0.295	0.25	0.07	0.16	0.09	-0.34	-0.06	0.09
64853	hSQ036004	|| C1orf80 || Chromosome 1 open reading frame 80 || Hs.534965 || NM_022831 || || 64853 || hHR031124 || 1435879	-0.35	-0.28	-0.62	-0.59	0.06	-0.02	-0.18	-0.5	-0.33	-0.5	-0.59	-0.08	-0.14	0.55	-0.395	-0.36	-0.24	0.38	0.67	0.3	-0.26	1.19
10097	hSQ008478	|| ACTR2 || ARP2 actin-related protein 2 homolog (yeast) || Hs.393201 || NM_001005386 || || 10097 || hHR026834 || 1435889	-1.97	-1.71	-1.27	-1.16	-0.98	-0.86	-3.66	-4.54	-3.25	-4.12	-2.65	-0.98	-1.32	-0.84	-2.565	-2.75	-2.26	-1.01	-0.34	0.09	-1.51	-0.66
64285	hSQ017085	|| RHBDF1 || Rhomboid 5 homolog 1 (Drosophila) || Hs.57988 || NM_022450 || || 64285 || hHR022255 || 1435921	-0.86	-0.89	-0.37	-0.35	-0.55	-0.78	-0.67	-0.77	-1.03	-1.24	-1.04	-1.55	-0.84	-1.45	0.855	0.96	1.22	0.83	0.36	0.15	1.58	0.06
3145	hSQ041943	|| HMBS || Hydroxymethylbilane synthase || Hs.82609 || NM_000190 || || 3145 || hCM001030 || 1435926	-0.1	-0.28	0.08	0.04	0.15	-0.26	0.86	0.72	0.75	0.6	0.61	-0.39	0.01	0.64	0.465	0.63	0.66	0.09	-0.23	0.16	1.21	0.49
6389	hSQ038018	|| SDHA || Succinate dehydrogenase complex, subunit A, flavoprotein (Fp) || Hs.440475 || NM_004168 || || 6389 || hCM001083 || 1435963	0.27	0.29	-0.16	-0.43	-0.5	-0.74	0.25	0.3	0.04	0.11	0.02	-0.58	0.29	-0.6	-1.175	-1.07	-1.24	-0.64	0.52	0.4	0.08	0.68
390488	hSQ017812	|| || || || XM_372527 || || || hHR028112 || 1435967	-1.56	-1.21	-0.27	-1.32	-0.39	-0.39	-0.28	-0.92	-0.63	0.01	-1.91	-0.88	-0.76	0.58	-1.715	-1.9	-2.84	-2.82	-0.44	0.11	-2.3	0.04
440489	hSQ028350	|| || || || XM_496272 || || || hHR025298 || 1436030	4.14	3.91	2.8	2.51	4.01	3.76	2.56	2.54	1.81	2.18	2.71	3.12	2.04	1.72	0.165	0.17	0.65	0.61	0.15	0.42	-3.58e-09	0.67
145767	hSQ001939	|| || || || AC092079 || || || hHR031226 || 1436067	-0.23	5.96e-09	-0.83	-1.31	-0.01	0.11	0.94	0.66	0.5	0.99	0.53	0.38	0.37	1.76	-0.985	-0.79	-0.89	-0.95	0.07	0.5	-1.47	-0.24
7168	hSQ027401	|| TPM1 || Tropomyosin 1 (alpha) || Hs.133892 || NM_000366 || || 7168 || hHR010295 || 1436082	1.29	1.05	0.51	0.27	1.01	0.37	0.91	0.98	-0.19	-0.44	0.61	-0.02	0.97	0.63	-1.735	-1.53	-3.87	-1.38	-1.66	-1.42	-1.57	-1.89
132556	hSQ034809	|| || || || XM_067904 || || || hHR028835 || 1436136	0.14	0.17	-0.02	-0.39	0.06	-0.04	1.07	1.38	1.43	1.72	1.54	0.63	0.91	1.27	0.615	0.99	0.6	0.69	0.6	0.85	0.69	1.33
130888	hSQ029870	|| FBXO36 || F-box protein 36 || Hs.140666 || NM_174899 || || 130888 || hHR022739 || 1436155	1.02	0.78	0.12	0.26	0.73	0.66	0.93	0.64	0.82	0.96	0.41	0.36	0.11	-0.35	0.475	0.52	0.86	0.02	0.45	0.43	0.43	1.12
7259	hSQ003314	|| TSPYL1 || TSPY-like 1 || Hs.458358 || BC048969 || || 7259 || hHR004386 || 1436178	-0.42	-0.2	-0.31	-0.56	0.42	0.34	-0.66	-0.49	-0.22	-0.01	-0.52	0.02	0.39	0.49	-0.195	0.07	-0.41	-0.19	0.62	0.55	-0.17	2.17
51714	hSQ034500	|| SELT || Selenoprotein T || Hs.369052 || NM_016275 || || 51714 || hHR028276 || 1436197	-1.97	-1.9	-1.12	-1.06	-1.1	-1.67	-0.45	-0.23	0.08	0.22	-1.35	-0.6	-0.72	-0.88	0.255	0.21	0.12	-0.42	0.44	0.24	-0.38	0.57
388807	hSQ031226	|| || || || XM_373922 || || || hHR008290 || 1436230	2.34	2.41	1.68	1.45	2.13	2.58	3.46	3.33	2.55	2.46	2.23	1.09	3.06	1.75	0.085	0.43	-1.44	-0.8	-1.42	-3.2	-0.51	-1.59
440229	hSQ043425	|| || || || XM_496033 || || || hHR030173 || 1436236	-0.12	-0.28	0.41	-0.14	0.19	0.38	1.04	0.79	1.1	-1.14	1.61	-0.21	-0.16	0.28	2.115	2.08	2.15	0.88	0.27	0.2	2.16	1.87
55154	hSQ029250	|| MSTO1 || Misato homolog 1 (Drosophila) || Hs.656547 || NM_018116 || || 55154 || hHR025639 || 1436253	-0.61	-0.46	-0.25	-0.67	-0.66	-0.71	2.38e-09	-0.1	-0.44	0.14	-0.65	-1.05	0.23	-0.73	-0.665	-0.47	-0.71	-0.86	0.02	-0.58	-0.7	-0.42
440037	hSQ022833	|| || || || XM_495870 || || || hHR027815 || 1436274	-0.08	-0.05	0.77	0.31	0.76	0.66	0.97	1.01	2.09	2.13	1.16	0.64	0.65	1.78	1.995	1.94	1.4	1.31	0.9	1.13	1.63	2.1
118432	hSQ040204	|| RPL29P2 || Ribosomal protein L29 pseudogene 2 || Hs.658086 || AF085886 || || 118432 || hHR029078 || 1436384	-0.36	-0.55	-0.12	-0.48	0.18	-0.3	0.71	0.74	0.56	1.01	0.54	0.12	-0.01	0.17	0.605	0.14	-0.37	-0.6	-0.57	-0.18	-0.54	1.38
1857	hSQ002704	|| DVL3 || Dishevelled, dsh homolog 3 (Drosophila) || Hs.388116 || NM_004423 || || 1857 || hHR021814 || 1436414	2.01	1.95	0.42	0.5	1.31	1.45	-0.06	0.11	-0.37	-1.06	0.97	0.18	1.01	-0.4	0.575	0.32	-0.07	-0.04	-0.08	-0.23	-0.34	0.06
6202	hSQ004700	|| RPS8 || Ribosomal protein S8 || Hs.512675 || NM_001012 || || 6202 || hHR030359 || 1436458	1.21	1.45	1.93	0.85	1.66	1.81	2.47	2.52	1.95	2.38	1.65	1.54	2.41	2.6	-0.075	-0.17	-0.75	-0.74	0.3	0.27	-0.61	0.08
283130	hSQ031799	|| SLC25A45 || Solute carrier family 25, member 45 || Hs.661604 || NM_182556 || || 283130 || hHR022023 || 1436461	2.15	1.88	1.6	0.89	1.07	0.59	1.51	1.41	1.78	1.61	1.7	0.75	1.22	-0.09	1.775	1.53	2.02	1.03	0.77	0.18	1.39	1.75
23595	hSQ003900	|| ORC3L || Origin recognition complex, subunit 3-like (yeast) || Hs.410228 || NM_012381 || || 23595 || hHR024884 || 1436537	-0.23	-0.11	-1.02	-1.34	-0.75	-0.55	0.75	0.69	0.35	0.5	0.45	0.18	0.11	0.11	0.205	-0.13	0.53	0.14	0.43	0.07	-0.38	0.11
27250	hSQ029433	|| PDCD4 || Programmed cell death 4 (neoplastic transformation inhibitor) || Hs.232543 || NM_145341 || || 27250 || hHR006341 || 1436560	-2.3	-2.16	-1.55	-2.02	-2.04	-2.11	-1.71	-1.62	-1.31	-1.13	-2.22	-1.39	-0.86	-2.15	-1.225	-1.16	-1.11	-1.12	-0.23	-0.76	-1.63	0.03
10672	hSQ025005	|| GNA13 || Guanine nucleotide binding protein (G protein), alpha 13 || Hs.515018 || NM_006572 || || 10672 || hHR002803 || 1436576	-0.46	-0.18	-0.66	-1	-0.21	-0.03	-0.3	-0.05	0.39	0.32	-0.19	0.3	-0.08	1.05	-0.145	-0.12	-0.05	0.39	0.69	0.54	-0.09	0.46
27097	hSQ020258	|| TAF5L || TAF5-like RNA polymerase II, p300/CBP-associated factor (PCAF)-associated factor, 65kDa || Hs.270621 || NM_014409 || || 27097 || hHR026758 || 1436616	-0.71	-0.77	-0.37	-0.76	-0.57	-0.47	-0.63	-0.84	-0.36	-0.25	-1.07	-1.01	-0.27	-0.92	-1.115	-1.05	-1.46	-1.23	-0.52	-0.95	-0.95	-0.9
79018	hSQ005317	|| C17orf39 || Chromosome 17 open reading frame 39 || Hs.187422 || NM_024052 || || 79018 || hHR016543 || 1436630	-0.54	-0.49	-0.08	-0.36	-0.09	0.06	0.29	-0.19	0.01	0.29	-0.41	-0.22	0.52	-0.3	0.305	0.38	0.61	0.33	1.23	0.55	-0.19	2.16
4074	hSQ026352	|| M6PR || Mannose-6-phosphate receptor (cation dependent) || Hs.134084 || NM_002355 || || 4074 || hHR020198 || 1436680	0.2	0.12	0.62	0.63	0.69	0.45	-1.51	-2.03	-0.49	-0.74	-0.3	-0.01	-0.39	-0.1	0.015	0.06	0.73	1.29	0.93	1.02	0.96	1.2
390948	hSQ035036	|| || || || NC_000019 || || || hHR022355 || 1436683	0.72	0.62	0.53	0.66	0.63	1	0.83	0.81	-0.17	-0.25	0.14	-0.33	0.08	-1.83	-1.295	-1.09	-1.1	-1.22	-1.27	-0.92	-0.76	-1.39
3145	hSQ040274	|| HMBS || Hydroxymethylbilane synthase || Hs.82609 || NM_000190 || || 3145 || hCM001053 || 1436686	-0.16	-0.34	0.33	-0.02	0.17	0.06	0.48	0.44	0.49	0.52	0.75	-0.45	-0.09	0.72	0.385	0.36	0.31	-0.2	-0.26	0.19	1.06	0.59
25898	hSQ026168	|| RCHY1 || Ring finger and CHY zinc finger domain containing 1 || Hs.48297 || NM_015436 || || 25898 || hHR005552 || 1436687	0.15	0.28	-0.03	0.05	0.72	0.9	1.14	1.36	0.71	0.84	0.43	0.5	0.45	1.11	1.075	1.02	1.04	0.71	1.18	1.31	0.82	1.34
346990	hSQ018477	|| || || || XM_294468 || || || hHR028806 || 1436712	0.22	0.22	-0.92	-0.88	0.05	0.2	1.31	1.09	1.42	1.03	1.32	0.9	0.63	1.8	0.945	0.81	0.55	0.36	0.17	0.93	0.67	-0.35
144438	hSQ016321	|| LOC144438 || Hypothetical protein LOC144438 || Hs.92308 || BX537514 || || 144438 || hHR004132 || 1436715	-0.68	-0.64	-0.67	-1.15	-0.98	-0.68	-0.31	-0.28	-0.32	-0.24	-0.11	-0.17	-0.11	-0.06	1.385	0.86	1.56	1.28	1.28	0.84	1.25	0.8
11118	hSQ015215	|| BTN3A2 || Butyrophilin, subfamily 3, member A2 || Hs.376046 || NM_007047 || || 11118 || hHR012536 || 1436735	-1.6	-1.58	-1.64	-1.54	-1.53	-2.17	-0.98	-1.33	-1.23	-1.37	-1.17	-1.73	-0.68	-1.75	-2.325	-2.13	-2.74	-3.15	-1.66	-1.48	-2.05	-1.34
388152	hSQ032867	|| || || || NM_203426 || || || hHR032112 || 1436803	-0.12	-0.06	0.36	-0.45	-0.37	-0.98	-0.29	-0.21	-0.16	-0.24	0.07	-1.52	-0.4	-1.75	-0.285	-0.29	-0.71	-1.38	-0.54	-0.82	0.22	0.04
3992	hSQ036871	|| FADS1 || Fatty acid desaturase 1 || Hs.503546 || NM_013402 || || 3992 || hHR010188 || 1436805	-0.25	-0.12	0.14	-0.15	-0.19	-0.19	-0.69	-0.51	-0.29	-0.08	-1.17	-0.61	0.15	-0.54	-0.965	-1.1	-1.24	-0.78	-0.69	-1.22	-1.02	-0.59
9238	hSQ006631	|| TBRG4 || Transforming growth factor beta regulator 4 || Hs.231411 || NM_004749 || || 9238 || hHR014780 || 1436809	-0.21	-0.26	0.44	0.06	0.37	0.31	0.27	0.47	0.06	0.12	0.47	-0.42	0.06	0.14	1.335	1.35	1.04	0.42	0.14	0.09	1.58	1.39
285321	hSQ001637	|| || || || XM_208313 || || || hHR028864 || 1436899	1.04	0.98	0.66	0.63	1.1	0.87	0.94	1.19	0.31	0.34	0.05	0.06	1.11	0.14	0.325	0.14	-0.12	0.15	0.32	-0.18	0.55	1.72
10097	hSQ035970	|| ACTR2 || ARP2 actin-related protein 2 homolog (yeast) || Hs.393201 || NM_005722 || || 10097 || hHR026428 || 1436945	-1.94	-1.47	-1.66	-1.26	-1.37	-1.09	-3.64	-4.16	-2.94	-3.35	-2.43	-1.09	-1.37	-1.17	-2.025	-2.29	-1.4	-1.13	0.02	0.09	-1.17	-0.78
9612	hSQ033882	|| NCOR2 || Nuclear receptor co-repressor 2 || Hs.137510 || NM_006312 || || 9612 || hHR003503 || 1437039	2.56	2.55	1.12	0.55	0.7	0.87	0.39	0.77	-1.21	-1.5	-0.76	-1.06	-0.64	-2.03	1.035	0.7	-0.81	-1.22	-0.42	-1.49	-0.35	-0.75
6134	hSQ037494	|| || || || NM_032241 || || || hHR025732 || 1437046	0.19	0.01	-0.55	-1.07	-0.94	-0.8	0.64	0.31	0.61	0.82	0.07	-1.11	0.57	-0.56	-0.395	-0.65	-0.66	-1.25	-1.73	-1.28	-0.73	-0.79
9939	hSQ013392	|| RBM8A || RNA binding motif protein 8A || Hs.654719 || NM_005105 || || 9939 || hHR030321 || 1437059	-0.96	-0.73	-0.58	-0.79	-0.69	-0.47	-1.25	-1.21	-1.51	-1.62	-1.89	-1.18	0.04	-0.9	-2.535	-2.03	-2.97	-2.22	-1.11	-1.23	-1.22	-1.26
1911	hSQ035735	|| PHC1 || Polyhomeotic homolog 1 (Drosophila) || Hs.305985 || NM_004426 || || 1911 || hHR031467 || 1437068	2.55	2.39	2.16	1.74	1.94	1.92	1.35	1.77	1.2	1.35	1.64	1.39	1.55	1.21	-0.035	-0.14	-0.34	0.17	2.24e-10	0.19	0.59	0.82
151230	hSQ037056	|| KLHL23 || Kelch-like 23 (Drosophila) || Hs.655150 || NM_144711 || || 151230 || hHR006263 || 1437158	-1.47	-1.06	0.03	-0.52	-0.75	-0.77	-2.5	-2.23	-1.58	-1.59	-2.41	-0.92	-0.65	-1.18	-1.485	-1.5	-1.64	-0.58	-0.41	-0.89	-1.07	0.02
440575	hSQ028657	|| || || || XM_496353 || || || hHR028410 || 1437163	-1.45	-1.25	-0.68	-1.26	-0.58	-0.71	-0.19	-0.37	-0.82	0.07	-1.44	-0.76	-0.54	0.19	-1.525	-1.09	-2.27	-2.56	-0.33	-0.17	-2.13	0.54
282992	hSQ031025	|| FLJ41350 || Hypothetical gene supported by AK123344 || Hs.386143 || AK096698 || || 399806 || hHR013008 || 1437168	1.58	1.68	1.06	0.48	1.19	1.14	0.7	0.29	0.47	0.35	0.21	0.2	0.47	0.66	1.025	1.07	0.8	0.31	-0.05	-0.3	-0.24	0.85
80154	hSQ007290	|| FLJ22795 || Hypothetical protein FLJ22795 || Hs.546614 || NM_025084 || || 80154 || hHR029676 || 1437272	0.88	0.86	0.76	0.17	0.23	0.33	0.66	0.67	0.68	0.24	1.21	-0.2	0.46	-0.42	0.105	0.2	-0.19	-0.53	-0.23	-1.11	0.51	-0.57
6185	hSQ043383	|| RPN2 || Ribophorin II || Hs.370895 || NM_002951 || || 6185 || hCT000599 || 1437300	1.64	1.47	0.55	0.94	1.25	1.68	-1.02	-1.15	-0.33	-1.94	0.86	0.78	1.07	1.11	0.615	0.77	1.3	2.1	1.15	2.05	1.68	1.12
10533	hSQ041173	|| ATG7 || ATG7 autophagy related 7 homolog (S. cerevisiae) || Hs.38032 || NM_006395 || || 10533 || hHR011093 || 1437307	0.59	0.5	0.39	0.07	0.32	-0.13	0.54	0.62	0.61	0.38	0.57	0.37	0.51	-0.1	1.515	1.2	1.08	0.84	0.82	0.7	1.12	1.46
23135	hSQ003556	|| JMJD3 || Jumonji domain containing 3 || Hs.223678 || AB002344 || || 23135 || hHR014560 || 1437368	3.77	3.99	2.52	1.55	1.9	2.52	1.77	2	0.55	-0.07	1.42	1.14	1.43	-0.15	2.385	2.12	1.55	1.18	0.71	0.63	1.18	1.4
7584	hSQ003536	|| ZNF35 || Zinc finger protein 35 || Hs.288658 || NM_003420 || || 7584 || hHR026909 || 1437429	0.53	0.52	-0.17	-0.13	0.31	0.34	1.05	1.05	0.93	0.77	0.62	0.53	0.51	0.43	1.975	1.7	1.77	2.03	1.62	1.27	1.69	2.21
8566	hSQ032003	|| || Chromosome 21 open reading frame 124 || Hs.284491 || NM_003681 || || 85006 || hHR007718 || 1437479	0.65	0.71	0.7	0.32	0.57	0.52	0.98	1	1.04	1.02	1.08	0.07	0.61	0.6	0.525	0.24	0.49	0.02	0.25	-0.09	0.82	0.31
5430	hSQ005727	|| POLR2A || Polymerase (RNA) II (DNA directed) polypeptide A, 220kDa || Hs.270017 || NM_000937 || || 5430 || hCT000716 || 1437528	2.19	1.85	1.1	0.45	0.83	0.78	1.43	1.43	1.2	0.94	1.23	0.33	0.8	0.72	1.345	1.28	0.88	0.64	0.5	0.09	1.17	0.75
6902	hSQ029436	|| TBCA || Tubulin folding cofactor A || Hs.291212 || NM_004607 || || 6902 || hHR029972 || 1437535	-0.4	-0.19	0.17	-0.66	-0.27	-0.19	2.13	1.94	0.42	1.24	0.05	-0.25	1.1	0.58	-1.515	-1.28	-2.42	-2.03	-0.96	-1.02	-3.02	-0.86
5810	hSQ034201	|| RAD1 || RAD1 homolog (S. pombe) || Hs.531879 || NM_133377 || || 5810 || hHR025311 || 1437546	-0.52	-0.46	0.17	0.2	7.15e-09	-0.01	-1.36	-1.79	-0.73	-0.79	-0.85	-0.28	-0.62	-0.98	-0.715	-0.7	-0.25	0.2	-0.37	0.41	-0.26	0.01
283345	hSQ009122	|| LOC283345 || RPL13-2 pseudogene || Hs.660970 || U72513 || || 283345 || hHR023898 || 1437565	-0.56	-0.58	-0.27	-0.48	0.28	0.01	0.77	0.24	0.19	0.33	0.06	-0.09	-0.08	0.7	-0.615	-0.29	-1.01	-2.3	-1.26	-0.78	-0.36	-1.56
54925	hSQ012962	|| ZNF434 || Zinc finger protein 434 || Hs.592078 || NM_017810 || || 54925 || hHR018155 || 1437610	0.27	0.05	-0.42	0.33	-0.12	0.05	-0.25	-0.08	0.08	-0.26	-0.29	-0.3	0.38	-0.62	-0.715	-0.69	-1.62	-0.55	-0.02	-0.26	-0.25	-0.01
4123	hSQ043628	|| MAN2C1 || Mannosidase, alpha, class 2C, member 1 || Hs.26232 || NM_006715 || || 4123 || hHR017069 || 1437663	0.36	0.28	0.48	-0.08	-0.67	-0.92	-0.34	-0.43	-0.54	-0.47	-0.18	-1.15	-0.85	-1.76	0.575	0.56	-0.1	-0.19	-0.29	-0.22	0.93	0.25
9761	hSQ028066	|| KIAA0152 || KIAA0152 || Hs.507074 || NM_014730 || || 9761 || hHR012890 || 1437727	0.03	-0.14	-0.41	-0.71	-0.37	-0.54	-1.18	-0.91	-0.31	-0.17	-0.52	-1.07	-0.18	-1.25	-0.795	-1.13	-0.54	-0.21	-0.69	-0.44	-0.34	0.47
6772	hSQ019837	|| STAT1 || Signal transducer and activator of transcription 1, 91kDa || Hs.642990 || NM_007315 || || 6772 || hHR008420 || 1437758	-0.4	-0.25	-0.28	-0.22	-0.13	0.01	-0.72	-0.55	-0.39	-0.36	-1.12	-0.24	-0.19	0.05	-0.435	-0.23	-0.61	-0.4	0.11	-0.21	-0.25	0.17
147172	hSQ027754	|| || || || NM_207323 || || || hHR031511 || 1437817	-0.04	-0.09	0.53	0.03	-0.58	-0.53	-1.37	-1.2	-1.08	-1.41	-0.94	-1.14	-0.5	-2.29	-0.755	-0.88	-1.03	-0.26	-0.76	-0.95	-0.36	-1.25
4122	hSQ007764	|| MAN2A2 || Mannosidase, alpha, class 2A, member 2 || Hs.116459 || NM_006122 || || 4122 || hHR022925 || 1437832	0.16	0.25	-0.76	-0.86	-0.41	-1.36	-0.96	-1.82	-1.29	-1.09	-0.71	-1.23	-0.33	-0.62	-1.085	-1.13	-1.77	-2.06	-0.12	-0.51	-0.72	0.46
441925	hSQ001240	|| || || || XM_497740 || || || hHR027168 || 1437833	3.07	2.53	2.55	2.13	2.55	2.51	-0.68	-1.16	-2	-3.33	2.6	1.85	1.49	2.2	1.165	1.24	0.62	0.53	-0.02	1.73	1.29	2.73
388148	hSQ040812	|| || || || XM_496082 || || || hHR028985 || 1437849	-1.15	-1.1	0.28	0.01	-0.09	-0.15	0.7	0.58	1.03	0.96	0.42	-0.02	-0.12	0.54	0.385	0.33	0.54	-0.15	-0.34	-0.02	0.15	0.09
441198	hSQ025308	|| || || || XM_496854 || || || hHR028445 || 1437910	1.11	1.27	0.27	-0.55	1.45	1.44	1.94	1.73	0.54	0.87	0.57	0.73	1.38	1.22	-0.035	-0.02	-0.35	-0.73	0.5	0.97	-1.56	0.4
2874	hSQ015813	|| KIAA1787 || KIAA1787 protein || Hs.654794 || NM_032442 || || 84461 || hHR019706 || 1437925	-0.14	-0.37	-0.14	-0.81	-0.27	-0.18	-0.39	-0.62	-1.1	-1.32	-0.45	-1.1	-1.16	-2.73	0.145	0.09	-0.48	-0.64	0.24	-0.26	0.63	0.48
440737	hSQ030027	|| LOC440737 || Similar to 60S ribosomal protein L35 || Hs.591528 || XM_496446 || || 440737 || hHR028536 || 1437945	0.39	0.72	0.22	-0.12	0.52	0.91	2.28	2.16	1.04	1.19	0.95	-0.03	1.1	1.79	-0.445	-0.6	-2.13	-2.64	-0.79	-1.13	-1.74	-1.79
140846	hSQ008522	|| C20orf120 || Chromosome 20 open reading frame 120 || Hs.554917 || CB529226 || || 140846 || hHR021983 || 1437960	5.88	6.09	5.13	4.31	5.48	5.95	1.21	0.61	0.68	0.96	1.96	2.38	0.38	0.24	-0.785	-0.9	-0.87	-0.83	-0.87	-1.09	-0.1	-0.46
84792	hSQ006347	|| || || || NM_032706 || || || hHR028618 || 1437977	0.1	0.16	0.37	0.28	0.07	0.27	0.22	0.4	0.96	1.07	0.43	-0.04	0.64	0.78	1.075	1.09	0.91	0.91	1.08	0.53	0.89	0.86
341315	hSQ034165	|| || || || XM_292012 || || || hHR029620 || 1437983	0.75	0.76	0.38	0.4	0.78	0.62	-0.35	-0.28	0.08	0.21	-0.57	0.13	0.37	-0.4	-1.505	-1.22	-0.41	0.58	0.47	0.6	-0.05	0.93
8502	hSQ031695	|| PKP4 || Plakophilin 4 || Hs.407580 || NM_003628 || || 8502 || hHR026647 || 1438070	0.56	0.5	-0.63	-0.29	-0.2	-0.41	-1.04	-0.76	-1.21	-1.25	-0.66	-0.51	-0.01	-1.27	-1.765	-1.34	-1.36	-0.97	-0.23	-0.39	-1.06	-0.29
56617	hSQ010890	|| || || Hs.202179 || || || || hHR031043 || 1438091	-1.96	-1.69	-0.37	-1.1	-0.41	-0.33	-0.62	-0.86	-0.61	-0.02	-1.22	-0.72	-0.53	0.11	-0.475	-0.39	-0.69	-0.8	0.23	-0.13	-1.11	0.34
402252	hSQ038649	|| || || || || || || hHR029239 || 1438117	-0.16	-0.23	0.07	-0.15	0.23	0.07	1.11	0.74	1.21	1.28	0.86	0.55	0.21	1.68	0.855	1.1	0.86	0.65	0.5	1.23	0.56	2.1
51317	hSQ013533	|| PHF21A || PHD finger protein 21A || Hs.502458 || NM_016621 || || 51317 || hHR016479 || 1438127	1.73	1.85	1.12	1.09	1.12	1.1	0.77	1.22	0.32	0.33	-0.05	0.44	1.12	-0.23	-0.785	-0.68	-0.57	-0.46	0.23	-0.34	-0.97	1.52
84321	hSQ038895	|| THOC3 || THO complex 3 || Hs.548868 || NM_032361 || || 84321 || hHR031807 || 1438227	-1.13	-1.2	-0.7	-1.07	-1.11	-1.36	-0.07	0.06	0.05	0.08	-0.33	-1.03	-0.19	-0.77	-0.325	-0.41	-0.2	-0.84	0.52	0.52	-0.11	0.76
10910	hSQ021115	|| SUGT1 || SGT1, suppressor of G2 allele of SKP1 (S. cerevisiae) || Hs.281902 || NM_006704 || || 10910 || hHR014807 || 1438309	-0.7	-0.52	-0.63	-0.65	-0.52	-0.5	0.77	0.74	0.61	0.67	-0.03	0.03	0.25	-0.08	1.295	1.01	1.15	1.2	1.27	0.96	0.73	-0.22
91695	hSQ028149	|| dJ222E13.2 || Similar to CGI-96 || Hs.655018 || AK098201 || || 91695 || hHR027044 || 1438374	-0.74	-0.94	-0.81	-0.85	0.18	-0.04	-1.92	-2.37	-3.02	-4.57	1.35	-0.98	-0.32	0.61	-0.775	-0.2	-0.85	-2.01	-1.21	-0.77	0.36	-0.67
7353	hSQ027387	|| UFD1L || Ubiquitin fusion degradation 1 like (yeast) || Hs.474213 || NM_005659 || || 7353 || hHR024407 || 1438382	1.12	1.11	0.55	-0.05	0.65	1.2	2.52	2.52	1.59	1.62	1.6	0.92	1.88	1.57	0.075	-0.23	-0.23	-0.45	0.38	0.29	-0.11	0.04
6125	hSQ027973	|| RPL5 || Ribosomal protein L5 || Hs.532359 || NM_000969 || || 6125 || hHR028946 || 1438424	0.86	1.27	0.84	-0.26	1.42	1.21	2.13	2.03	0.73	1.39	0.53	1.12	1.33	1.5	-1.835	-1.56	-1.99	-2.03	-0.39	-0.23	-2.36	-0.29
441155	hSQ015201	|| RP11-74E24.2 || Zinc finger CCCH-type domain-containing pseudogene || Hs.546686 || XM_496814 || || 441155 || hHR030110 || 1438463	-0.66	-0.55	-1.18	-1.24	-0.65	-0.63	-0.65	-0.53	-0.96	-0.64	-1.84	-1.17	-0.69	-1.06	0.245	0.1	-0.44	-0.17	2.24e-10	-0.17	0.34	-1.49e-09
29078	hSQ031704	|| C6orf66 || Chromosome 6 open reading frame 66 || Hs.591333 || NM_014165 || || 29078 || hHR025574 || 1438478	0.33	0.19	0.01	0.14	0.75	0.55	1.5	1.61	1.86	1.71	1.41	0.78	0.53	1.63	0.515	0.45	0.5	0.72	0.02	0.41	0.49	-0.05
3251	hSQ037238	|| HPRT1 || Hypoxanthine phosphoribosyltransferase 1 (Lesch-Nyhan syndrome) || Hs.412707 || NM_000194 || || 3251 || hCM000863 || 1438489	-1.77	-1.74	-0.39	-1.21	-0.71	-1.03	0.11	-0.16	0.86	1.03	-0.53	-0.35	-0.51	-8.94e-10	0.185	-0.01	0.84	-0.11	0.68	0.7	0.15	0.81
998	hSQ034397	|| CDC42 || Cell division cycle 42 (GTP binding protein, 25kDa) || Hs.693589 || NM_001791 || || 998 || hHR027750 || 1438494	-0.7	-0.58	-0.57	-1.06	-0.35	-0.22	1.1	0.83	0.86	0.91	0.35	-0.14	0.29	0.47	1.075	0.5	0.74	0.16	0.45	0.09	-0.1	1.47
441481	hSQ034449	|| || || || XM_497092 || || || hHR030212 || 1438496	-0.88	-0.77	0.17	-0.47	0.13	0.37	0.87	0.4	0.66	0.34	0.42	-0.31	-0.21	1.4	0.735	0.92	0.24	-0.24	-0.27	0.3	-3.58e-09	0.79
10098	hSQ000073	|| TSPAN5 || Tetraspanin 5 || Hs.591706 || NM_005723 || || 10098 || hHR003508 || 1438517	0.18	0.48	0.7	0.87	0.54	0.42	-1.28	-2.33	-1.12	-1.37	-0.15	0.52	-0.09	-0.59	-0.355	-0.13	-0.25	0.56	-0.23	-0.62	-0.26	-0.89
155370	hSQ023437	|| SBDSP || Shwachman-Bodian-Diamond syndrome pseudogene || Hs.585053 || BC010183 || || 155370 || hHR027838 || 1438533	-0.8	-0.72	-1.01	-0.48	-0.33	-0.37	-0.37	-0.81	-0.39	-1.42	-0.81	-0.26	-0.01	-0.21	-1.415	-1.06	-0.21	-1.1	0.46	0.79	-0.4	-0.41
390823	hSQ011768	|| || || || XM_496264 || || || hHR029583 || 1438558	-0.29	-0.34	-0.2	-0.61	0.19	0.24	1.03	0.81	0.9	1.32	0.45	-0.26	-0.04	1	1.145	0.78	1.21	0.54	0.63	0.65	0.85	1.56
79172	hSQ008094	|| ADCY3 || Adenylate cyclase 3 || Hs.467898 || NM_024322 || || 109 || hHR014122 || 1438614	-0.03	0.02	-0.02	-0.33	-0.08	-0.21	0.06	0.42	0.71	0.67	0.57	-0.03	0.56	-0.06	1.195	0.96	1.4	0.97	0.97	0.72	1	0.31
389644	hSQ000113	|| || || || NC_000008 || || || hHR029122 || 1438652	0.66	0.94	0.14	-0.24	0.96	1.05	1.89	1.96	0.99	1.4	0.79	0.66	1.44	1.8	-1.455	-1.13	-2	-1.96	-0.16	-0.31	-2.07	0.56
6908	hSQ035805	|| TBP || TATA box binding protein || Hs.590872 || NM_003194 || || 6908 || hCM000918 || 1438687	0.48	0.25	-0.23	-0.22	1.23	-0.06	0.65	0.67	0.98	0.72	0.13	0.45	0.25	-0.05	0.875	0.56	1.37	1.5	0.62	1.29	1.44	0.82
3251	hSQ021318	|| HPRT1 || Hypoxanthine phosphoribosyltransferase 1 (Lesch-Nyhan syndrome) || Hs.412707 || NM_000194 || || 3251 || hCM000971 || 1438724	-2.12	-2.04	-1.48	-1.6	-1.15	-1.23	-0.26	-0.29	0.51	0.91	-0.82	-0.64	-0.2	0.19	0.165	-0.22	0.5	-6.71e-10	0.81	0.61	-0.21	0.9
10838	hSQ021928	|| ZNF275 || Zinc finger protein 275 || Hs.348963 || AK122976 || || 10838 || hHR007376 || 1438735	0.15	0.09	0.23	0.11	0.35	0.5	-1.48	-1.15	-1.37	-1.22	-1.45	-0.95	-0.33	-1.76	-0.345	-0.58	0.11	0.4	-0.28	-0.07	0.2	0.42
55234	hSQ036621	|| SMU1 || Smu-1 suppressor of mec-8 and unc-52 homolog (C. elegans) || Hs.655351 || NM_018225 || || 55234 || hHR029658 || 1438745	0.1	0.35	0.09	0.04	0.8	0.77	0.1	-0.34	-0.3	-0.04	0.03	-0.13	0.28	0.4	0.035	-0.26	0.2	0.33	0.59	0.92	0.33	1.34
84275	hSQ039883	|| SLC25A33 || Solute carrier family 25, member 33 || Hs.568613 || NM_032315 || || 84275 || hHR015390 || 1438748	-0.93	-0.85	-0.62	-0.97	-0.32	-0.54	0.37	0.14	0.48	0.59	-0.13	-0.25	-0.03	0.41	0.595	0.99	1.17	0.64	0.77	0.6	0.44	1
85359	hSQ007892	|| DGCR6L || DiGeorge syndrome critical region gene 6-like || Hs.410965 || NM_033257 || || 85359 || hHR031758 || 1438806	-0.79	-0.97	-0.38	-1.02	-0.85	-0.63	0.36	0.35	0.12	-0.06	0.33	-0.98	-0.41	0.09	-0.655	-0.46	-1.28	-1.96	-1.29	-0.87	-3.58e-09	0.72
10224	hSQ003237	|| ZNF443 || Zinc finger protein 443 || Hs.631623 || NM_005815 || || 10224 || hHR030594 || 1438954	0.05	0.2	-0.03	-0.15	0.28	0.24	1.02	1	0.77	0.96	0.67	0.18	0.29	-0.09	1.035	0.88	0.12	0.33	0.89	0.48	0.39	0.79
55051	hSQ005646	|| C14orf102 || Chromosome 14 open reading frame 102 || Hs.528131 || NM_017970 || || 55051 || hHR012403 || 1438960	-0.07	0.07	-0.57	-0.93	-0.23	-0.41	0.3	0.42	-0.4	-0.27	-0.44	-0.82	0.31	-0.65	0.305	-0.07	-0.48	0.2	0.04	-0.17	-0.01	-0.72
9315	hSQ035383	|| C5orf13 || Chromosome 5 open reading frame 13 || Hs.36053 || NM_004772 || || 9315 || hHR029858 || 1438972	-0.82	-0.62	-0.16	-0.77	-0.49	-0.32	0.34	0.07	0.33	0.42	-0.39	-0.51	-0.17	-0.57	0.885	0.63	0.39	0.24	-0.17	-0.13	-0.65	-0.99
124446	hSQ017249	|| LOC124446 || Hypothetical protein BC017488 || Hs.460574 || BC050051 || || 124446 || hHR015749 || 1438976	-0.84	-1.01	0.04	-0.53	-1.06	-0.78	2.09	2.11	1.4	1.58	0.75	-0.42	-0.11	-0.28	2.195	1.94	1.35	0.68	0.11	0.16	0.77	1.55
441419	hSQ009245	|| || || || || || || hHR032029 || 1439024	-0.55	-0.65	-0.31	-0.25	0.12	0.03	0.9	0.85	0.8	0.95	0.66	-0.3	0.07	0.5	0.105	0.31	-0.05	-0.67	-0.5	0.11	0.43	1.02
5831	hSQ009177	|| PYCR1 || Pyrroline-5-carboxylate reductase 1 || Hs.458332 || NM_006907 || || 5831 || hHR032007 || 1439028	0.8	0.66	1.22	0.38	0.31	0.34	0.92	1.1	1.12	0.98	1.25	-0.02	0.12	0.22	0.555	0.92	0.47	-0.51	-0.15	-0.11	0.98	1.76
340529	hSQ034444	|| RP11-493K23.2 || Similar to poly(A) binding protein, cytoplasmic 1 || Hs.567854 || BC041956 || || 645974 || hHR025463 || 1439051	1.27	1.48	1.21	0.74	0.85	1.24	0.89	1.09	1.28	0.97	1.25	0.36	0.46	0.08	2.255	2.05	1.57	1.17	0.91	0.36	1.78	0.88
26523	hSQ008490	|| EIF2C1 || Eukaryotic translation initiation factor 2C, 1 || Hs.22867 || NM_012199 || || 26523 || hHR014883 || 1439065	-0.54	-0.73	-0.87	-1.17	-0.73	-1.12	-1.09	-2.27	-1.52	-1.82	-1.42	-1.11	-0.26	-2.23	-0.405	-0.52	-0.03	-0.33	0.14	-0.24	-0.29	-0.16
51096	hSQ032659	|| NME1 || Non-metastatic cells 1, protein (NM23A) expressed in || Hs.463456 || NM_016001 || || 4830 || hHR024108 || 1439074	0.92	1.07	0.48	0.31	1.03	1.06	2.2	2.19	1.04	1.03	1.02	0.52	1.28	1.13	-1.105	-0.8	-1.02	-0.56	0.05	-0.46	-0.51	-0.7
389362	hSQ036893	|| || || || XM_374159 || || || hHR002042 || 1439110	-2.16	-1.74	-0.87	-1.37	-1.02	-0.94	-0.09	-0.21	-0.11	0.06	-0.67	-0.94	-0.89	-0.51	-0.195	-0.74	-0.89	-0.27	-0.62	-0.74	-0.49	-0.2
253981	hSQ009830	|| RELL1 || Receptor expressed in lymphoid tissues like 1 || Hs.283378 || AK025431 || || 768211 || hHR002229 || 1439148	-0.9	-0.64	-0.42	-0.76	-0.46	5.96e-10	-0.28	-0.25	-0.37	-0.15	-1.08	-0.38	0.05	-0.11	-0.475	-0.6	-0.15	0.02	0.23	-0.25	-0.59	-0.62
402577	hSQ029449	|| || || || XM_379906 || || || hHR030772 || 1439168	0.13	-0.03	0.35	0.2	0.24	0.09	1.28	1.38	1.04	1.41	0.72	0.09	0.39	-0.04	0.365	0.41	0.54	0.15	0.29	0.37	0.55	0.85
7013	hSQ020429	|| TERF1 || Telomeric repeat binding factor (NIMA-interacting) 1 || Hs.442707 || NM_017489 || || 7013 || hHR030167 || 1439220	0.75	1.05	0.12	-0.15	1.28	1.65	0.31	0.46	-0.6	-0.04	-0.92	0.34	0.58	0.74	-1.105	-1.29	-3.42	-0.7	0.03	-0.13	-1.18	-0.73
60386	hSQ027478	|| SLC25A19 || Solute carrier family 25 (mitochondrial thiamine pyrophosphate carrier), member 19 || Hs.514470 || NM_021734 || || 60386 || hHR016214 || 1439225	-0.01	-0.12	0.02	-0.11	0.42	0.05	0.05	0.15	0.46	0.66	0.23	-0.35	0.05	-0.24	0.385	0.21	0.2	-6.71e-10	-0.02	0.05	0.89	0.38
7247	hSQ035870	|| TSN || Translin || Hs.75066 || NM_004622 || || 7247 || hHR008426 || 1439243	-1.14	-1.1	-1.22	-0.95	-0.82	-1.48	-0.36	-1.13	-0.35	-0.15	-1.1	-0.03	-0.28	-0.43	-1.495	-1.61	-1.12	-0.75	-0.59	-0.49	-1.2	0.37
441261	hSQ040950	|| LOC441261 || similar to Farnesyl pyrophosphate synthetase (FPP synthetase) (FPS) (Farnesyl diphosphate synthetase) || || || || 441261 || hHR031493 || 1439292	-0.74	-0.93	-0.8	-1.15	-0.87	-0.84	0.78	0.73	0.59	0.5	0.85	-0.51	0.28	0.35	-0.975	-0.9	-1.2	-2.05	-0.83	-0.69	-0.72	-0.97
90271	hSQ019601	|| C10orf75 || Chromosome 10 open reading frame 75 || Hs.654734 || BC062533 || || 90271 || hHR013840 || 1439295	1.25	0.86	0.82	0.65	0.91	1.12	2.03	1.77	1.41	0.65	2.03	1.11	1.07	1.49	1.715	1.47	1.04	0.57	0.06	0.68	0.78	0.53
6745	hSQ031156	|| SSR1 || Signal sequence receptor, alpha (translocon-associated protein alpha) || Hs.114033 || NM_003144 || || 6745 || hHR002399 || 1439323	0.11	0.24	0.8	-0.1	0.83	1.09	0.97	0.84	0.71	0.93	-0.06	0.43	0.25	0.75	0.585	0.09	0.34	0.15	0.14	0.25	0.09	1.03
3145	hSQ040268	|| HMBS || Hydroxymethylbilane synthase || Hs.82609 || NM_000190 || || 3145 || hCM000836 || 1439331	-0.03	-0.2	0.01	-0.16	0.01	-0.16	0.76	0.81	0.72	0.7	0.77	-0.43	-0.09	0.62	0.645	0.6	0.65	0.17	-0.11	0.11	1.05	0.72
442064	hSQ031720	|| LOC442064 || Phosphatidylinositol glycan anchor biosynthesis, class Y pseudogene || Hs.671870 || XM_497897 || || 442064 || hHR028434 || 1439381	0.09	0.01	0.43	0.16	0.09	0.15	-1	-1.52	-0.66	-1.89	1.12	0.17	0.03	1.11	0.315	0.59	0.87	0.12	-0.07	0.41	0.35	-1.14
201229	hSQ021807	|| || || || AK055808 || || || hHR019875 || 1439423	-1.06	-1.01	-0.99	-1.3	-1.58	-1.59	-0.16	-0.58	-0.21	-0.12	-0.97	-1.24	-0.54	-1.25	0.115	-0.33	-0.93	-1.22	-0.89	-1.18	-1.09	-0.53
3251	hSQ021140	|| HPRT1 || Hypoxanthine phosphoribosyltransferase 1 (Lesch-Nyhan syndrome) || Hs.412707 || NM_000194 || || 3251 || hCM000994 || 1439466	-1.74	-1.71	-1.44	-1.65	-1.3	-1.15	0.37	0.14	0.97	1.16	-0.14	-0.48	-0.44	0.39	0.525	0.49	1.18	0.47	0.98	0.79	0.22	0.8
402318	hSQ006251	|| || similar to 60S ribosomal protein L32 || || || || || hHR027970 || 1439469	-0.42	-0.09	0.83	0.07	1.04	1.43	1.05	0.74	0.72	1.18	0.7	0.27	0.12	1.61	-0.925	-0.52	-0.97	-1.02	-0.19	0.21	-1.11	0.16
392281	hSQ000356	|| || || || XM_497005 || || || hHR025027 || 1439545	0.48	0.45	0.02	0.39	0.83	0.52	1.12	0.79	0.29	-1.12	0.77	-0.03	0.57	0.12	-0.735	-0.41	-2.09	-0.45	-0.39	0.17	-0.39	1.09
4771	hSQ022954	|| || || || NM_181826 || || || hHR006425 || 1439560	0.54	0.8	0.09	-0.23	0.74	0.37	-0.45	-0.55	-1.63	-1.25	-2.03	-0.79	-0.13	-1.71	-0.505	-0.8	-1.01	-1.16	-0.55	-0.92	-0.83	-1.18
23112	hSQ031455	|| TNRC6B || Trinucleotide repeat containing 6B || Hs.372082 || AB029016 || || 23112 || hHR017796 || 1439570	-0.29	-0.38	-0.79	-1.04	-0.55	-0.45	-1.66	-2.09	-2.55	-3.39	-2.66	-1.8	-1.41	-2.64	0.985	0.91	0.21	0.58	0.3	-0.36	1.15	-0.26
154467	hSQ006786	|| C6orf129 || Chromosome 6 open reading frame 129 || Hs.284207 || AF161383 || || 154467 || hHR010077 || 1439575	0.63	0.53	1.08	0.78	1.15	1.11	2.14	2.09	1.57	1.7	1.85	0.96	1.01	1.85	0.785	0.6	-0.78	-0.97	-1	-0.13	-0.47	0.89
91272	hSQ031960	|| FAM44B || Family with sequence similarity 44, member B || Hs.425091 || NM_138369 || || 91272 || hHR026963 || 1439647	-1.02	-0.88	-0.27	-0.26	-0.52	-0.48	-0.02	0.52	0.47	0.99	-0.58	-0.5	-0.04	-0.65	0.795	0.54	1.16	0.38	0.93	0.91	0.78	2.6
10160	hSQ028087	|| FARP1 || FERM, RhoGEF (ARHGEF) and pleckstrin domain protein 1 (chondrocyte-derived) || Hs.403917 || NM_005766 || || 10160 || hHR012523 || 1439698	0.64	0.76	0.55	0.27	0.31	-0.01	-0.33	-0.03	-0.17	-0.33	-0.01	-0.46	0.33	-0.48	-0.325	-0.35	-0.68	-0.33	-0.29	-0.97	-0.17	-1.02
440348	hSQ008653	|| || || || XM_496128 || || || hHR031946 || 1439735	1.17	0.93	-0.93	-1.44	-1.07	-1	-1.36	-1.39	-2.39	-2.24	-1.67	-2.22	-1.14	-2.45	-0.525	-0.62	-0.83	-1.05	0.16	-0.16	-0.19	0.51
10092	hSQ008890	|| ARPC5 || Actin related protein 2/3 complex, subunit 5, 16kDa || Hs.518609 || NM_005717 || || 10092 || hHR022583 || 1439834	0.46	0.61	-1.36	-1.42	0.23	0.38	0.34	0.41	0.31	0.47	-0.11	0.43	0.43	1.87	-1.365	-1.35	-1.37	0.18	0.25	0.87	-0.13	-2.18
84108	hSQ016424	|| PCGF6 || Polycomb group ring finger 6 || Hs.335808 || NM_001011663 || || 84108 || hHR027131 || 1439878	1.57	1.66	2.07	1.46	1.62	2.32	1.85	1.77	1.93	1.88	2.11	0.94	2.04	1.9	0.835	0.89	0.42	0.38	-0.37	-0.42	1.21	1.06
7012	hSQ022968	|| || || || NR_001566 || || || hHR019373 || 1439916	0.9	0.67	0.76	0.67	1.11	0.86	1.96	1.42	0.66	0.22	1.87	1.06	-0.6	1.3	2.555	1.73	0.47	0.3	-0.62	0.08	0.78	0.23
375260	hSQ043446	|| || || || NM_198943 || || || hHR030828 || 1439917	-0.54	-0.53	-0.2	-1.14	-0.89	-0.91	0.37	0.28	-0.31	-0.56	0.21	-1.63	0.32	-0.7	0.085	0.35	-0.12	-1.16	0.05	-0.67	0.85	0.07
113878	hSQ017390	|| DTX2 || Deltex homolog 2 (Drosophila) || Hs.187058 || NM_020892 || || 113878 || hHR021463 || 1439924	1.85	1.91	1.83	1.73	1.72	1.84	1.58	1.65	0.87	0.33	1.88	0.82	1.12	0.57	1.345	1.39	1.69	0.85	0.47	-0.14	1.76	0.14
3251	hSQ044221	|| HPRT1 || Hypoxanthine phosphoribosyltransferase 1 (Lesch-Nyhan syndrome) || Hs.412707 || NM_000194 || || 3251 || hCM000791 || 1439929	-1.73	-1.7	-1.49	-1.65	-1.26	-1.34	0.02	0.28	1	1.14	-0.3	-0.46	-0.4	0.39	0.615	0.29	1.02	0.44	0.97	0.73	0.2	0.57
284988	hSQ003397	|| || || || XM_209429 || || || hHR030092 || 1439937	-0.63	-0.34	0.02	0.01	0.04	0.23	-1.22	-1.22	-1.33	-1.22	-1.6	-0.26	-0.78	-0.7	-0.985	-0.8	-1.14	-0.21	-0.18	-0.77	-0.83	-0.9
1348	hSQ012075	|| || || || NG_004712 || || || hHR027737 || 1439961	-0.92	-0.94	-0.25	-0.58	-0.28	-0.1	0.15	-0.04	0.21	0.95	-0.21	-0.25	-0.49	1.07	-0.175	0.03	-0.74	-0.8	-0.28	0.37	-0.67	0.58
124512	hSQ025468	|| LOC124512 || Hypothetical protein LOC124512 || Hs.74655 || BC045819 || || 124512 || hHR007018 || 1439968	-1.45	-1.17	0.27	-0.48	-0.05	-0.01	0.47	0.14	0.52	0.99	-0.1	-0.5	-0.17	0.96	1.085	1.26	0.65	-0.15	0.21	0.1	-0.18	-0.68
3251	hSQ035767	|| HPRT1 || Hypoxanthine phosphoribosyltransferase 1 (Lesch-Nyhan syndrome) || Hs.412707 || NM_000194 || || 3251 || hCM000866 || 1439973	-1.8	-1.7	-1.73	-1.73	-1.36	-1.62	0.1	0.09	0.84	0.83	-0.34	-0.71	-0.55	0.05	0.195	-0.03	0.81	0.23	0.9	0.33	0.13	-0.07
5687	hSQ005345	|| PSMA6 || Proteasome (prosome, macropain) subunit, alpha type, 6 || Hs.446260 || NM_002791 || || 5687 || hHR030310 || 1440014	-0.51	-0.38	-0.33	-0.54	-0.13	-0.1	0.89	0.48	0.58	0.47	0.79	0.32	0.13	1.5	0.135	0.3	0.28	-0.35	0.28	0.34	0.22	0.7
116225	hSQ035094	|| ZMYND19 || Zinc finger, MYND-type containing 19 || Hs.128096 || NM_138462 || || 116225 || hHR010746 || 1440032	-1.58	-1.67	-1.32	-1.66	-1.36	-1.69	-0.68	-0.78	-0.87	-0.7	-1.03	-2.19	-0.64	-1.65	-2.185	-1.87	-3.8	-4.02	-1.86	-1.68	-1.44	-0.77
6525	hSQ040327	|| SMTN || Smoothelin || Hs.149098 || NM_134269 || || 6525 || hHR018630 || 1440059	1.16	1.17	0.36	0.14	-0.19	-0.24	0.54	0.87	-0.01	-0.15	0.6	-0.85	0.37	-1.03	1.195	1.16	0.44	-0.36	0.13	-0.44	0.9	0.16
140826	hSQ003998	|| || || || NM_178472 || || || hHR026600 || 1440120	0.9	1.13	0.8	0.24	1.22	1.26	3.15	2.86	0.89	1.3	0.8	0.86	1.69	1.66	-1.365	-0.7	-2.1	-1.56	0.22	-0.08	-2.07	0.02
2731	hSQ018648	|| GLDC || Glycine dehydrogenase (decarboxylating) || Hs.584238 || NM_000170 || || 2731 || hHR029112 || 1440123	0.33	0.43	-0.17	-0.38	-0.22	-0.32	0.04	0.21	-0.27	-0.2	-0.3	-0.33	0.29	-0.5	0.025	-0.2	-0.44	0.09	0.1	-0.23	-0.12	-0.37
835	hSQ014548	|| CASP2 || Caspase 2, apoptosis-related cysteine peptidase (neural precursor cell expressed, developmentally down-regulated 2) || Hs.368982 || NM_032982 || || 835 || hHR005048 || 1440160	0.02	0.19	0.21	-0.29	-0.03	-0.31	-0.01	0.21	-0.02	-0.11	-0.41	-0.62	0.08	-0.81	1.335	1.06	1.02	0.56	0.51	0.59	0.63	1.78
8531	hSQ045191	|| CSDA || Cold shock domain protein A || Hs.221889 || NM_003651 || || 8531 || hHR028670 || 1440215	0.52	0.73	1.55	0.61	0.86	0.86	0.08	-0.22	-0.68	-0.12	-1	-0.12	0.21	0.03	-1.905	-1.93	-1.84	-1.26	-0.35	-0.81	-2.02	0.02
3688	hSQ031614	|| ITGB1 || Integrin, beta 1 (fibronectin receptor, beta polypeptide, antigen CD29 includes MDF2, MSK12) || Hs.643813 || NM_002211 || || 3688 || hHR030490 || 1440237	-0.97	-0.92	-0.65	-0.77	-0.61	-0.72	-0.01	-0.05	0.32	0.45	-0.8	-0.7	-0.33	-0.01	-0.665	-0.5	-0.26	-0.26	0.11	-0.03	-0.33	0.26
6185	hSQ014767	|| RPN2 || Ribophorin II || Hs.370895 || NM_002951 || || 6185 || hCT000595 || 1440258	1.87	1.77	0.81	0.8	1.21	1.43	0.81	0.62	0.67	0.25	1.35	0.91	1.24	1.03	0.985	1.15	1.81	2.46	1.31	1.91	1.8	1.22
657	hSQ032383	|| BMPR1A || Bone morphogenetic protein receptor, type IA || Hs.524477 || NM_004329 || || 657 || hHR029759 || 1440261	-1.22	-0.85	-0.47	-0.63	-0.13	-0.05	-0.86	-0.76	-0.51	-0.45	-1.55	-0.26	-0.45	-0.55	0.015	0.13	-0.07	0.03	0.68	0.31	-0.17	0.87
56913	hSQ032404	|| C1GALT1 || Core 1 synthase, glycoprotein-N-acetylgalactosamine 3-beta-galactosyltransferase, 1 || Hs.592180 || NM_020156 || || 56913 || hHR024916 || 1440278	-0.02	-0.12	-0.5	-0.85	-0.38	-0.59	0.79	0.9	0.74	0.75	-0.06	0.14	0.12	0.22	0.175	0.21	0.45	0.28	0.81	0.19	0.03	1
9334	hSQ006328	|| B4GALT5 || UDP-Gal:betaGlcNAc beta 1,4- galactosyltransferase, polypeptide 5 || Hs.370487 || NM_004776 || || 9334 || hHR006576 || 1440337	-0.7	-0.54	-0.6	-0.73	0.34	0.21	-0.92	-0.8	-0.37	-0.28	-0.98	-0.49	-0.11	-0.04	0.365	0.32	0.34	0.24	0.42	0.16	-0.12	0.24
388962	hSQ027603	|| BOLA3 || BolA homolog 3 (E. coli) || Hs.61472 || NM_212552 || || 388962 || hHR029286 || 1440362	-0.81	-0.91	-0.73	-1.17	-0.43	-0.42	1.25	1.52	1.18	0.93	0.63	-0.09	0.3	0.45	-0.045	-0.04	-0.52	-0.88	-0.6	-0.56	-1.14	-0.15
310	hSQ040572	|| ANXA7 || annexin A7 || Hs.631827 || || || 310 || hCT001072 || 1440435	-0.06	-0.28	-0.73	-0.42	-0.52	-0.43	-0.89	-0.77	-0.36	-1.08	0.36	-0.02	0.37	0.17	-0.355	-0.28	0.88	0.4	0.5	0.94	1	0.24
51729	hSQ043394	|| WBP11 || WW domain binding protein 11 || Hs.655138 || NM_016312 || || 51729 || hHR028176 || 1440472	1.42	1.67	1.19	0.72	1.67	1.96	1.37	1.45	0.42	0.81	0.14	0.39	1.15	0.76	-0.005	-0.1	-0.36	-0.26	0.19	-0.01	-0.39	-0.87
440469	hSQ003472	|| || || || XM_498688 || || || hHR031865 || 1440480	-0.17	-0.37	-0.63	-0.75	-0.88	-1	-1.53	-1.7	-1.89	-2.19	-0.92	-1.8	-1.21	-1.72	-0.155	0.02	-0.35	-0.27	-0.51	-0.4	0.43	0.2
440039	hSQ033941	|| || || || XM_495872 || || || hHR029966 || 1440499	-0.88	-0.88	-0.55	-0.75	-0.67	-0.74	0.72	0.73	1.12	1.05	0.28	-0.3	-0.26	0.34	1.245	1.06	1.6	0.89	0.94	0.27	1.06	0.23
441437	hSQ008103	|| || || || XM_499145 || || || hHR031996 || 1440517	-0.1	-0.22	-0.23	-0.6	-0.23	5.96e-10	1.41	1.24	1.1	1.14	0.9	-0.4	0.28	0.52	1.135	1	0.83	-0.08	0.02	0.08	0.98	1.09
9019	hSQ029555	|| MPZL1 || Myelin protein zero-like 1 || Hs.493919 || NM_003953 || || 9019 || hHR003219 || 1440557	0.23	0.2	0.37	0.18	0.61	0.42	-0.33	-0.13	0.02	0.24	-0.21	-0.31	0.33	-0.19	-0.545	-0.7	-0.11	0.04	-0.28	-0.02	-0.06	1.49
4577	hSQ015639	|| || || || NC_001807 || || || hHR031398 || 1440614	0.99	1.09	0.38	0.08	0.56	1.2	-0.16	-0.51	0.61	0.37	1.91	0.39	-0.35	2.12	2.305	2.74	0.05	-2.19	-0.92	-0.49	-0.92	0.54
6389	hSQ038014	|| SDHA || Succinate dehydrogenase complex, subunit A, flavoprotein (Fp) || Hs.440475 || NM_004168 || || 6389 || hCM001131 || 1440633	0.35	0.19	0.28	-0.41	-0.42	-0.72	2.38e-09	0.22	-0.21	0.28	0.14	-0.63	0.11	-0.8	-1.365	-1.35	-1.46	-0.69	0.3	0.5	-0.07	0.71
9648	hSQ000267	|| GCC2 || GRIP and coiled-coil domain containing 2 || Hs.436505 || NM_181453 || || 9648 || hHR028260 || 1440672	0.49	0.6	-0.34	-0.54	0.35	0.46	-0.38	-0.07	-0.36	-0.41	-0.68	-0.27	-0.52	0.72	0.635	0.46	0.66	0.86	0.82	0.36	0.66	-0.03
8766	hSQ042917	|| RAB11A || RAB11A, member RAS oncogene family || Hs.321541 || NM_004663 || || 8766 || hHR012869 || 1440710	-1.94	-1.7	-0.86	-1.23	-1.33	-1.17	-0.15	-0.48	0.13	0.44	-0.98	-0.98	-0.49	-1.09	0.135	-0.09	0.1	-0.46	-0.03	-0.43	-0.79	0.81
4501	hSQ015520	|| MT1X || Metallothionein 1X || Hs.374950 || NM_005952 || || 4501 || hHR030258 || 1440768	0.25	0.14	0.41	-0.17	-0.11	0.01	1.64	1.63	1.88	1.8	1.26	0.22	0.37	0.9	2.055	1.75	0.73	0.33	-0.16	0.18	0.72	1.27
23252	hSQ032946	|| OTUD3 || OTU domain containing 3 || Hs.374987 || AB007928 || || 23252 || hHR011902 || 1440772	-1.81	-1.78	-1.46	-1.53	-1.59	-1.73	-2.24	-1.75	-2.07	-2.29	-3.08	-1.82	-1.34	-2.42	0.675	0.51	0.82	0.46	0.57	0.38	1.21	1.69
2020	hSQ024545	|| EN2 || Engrailed homeobox 2 || Hs.134989 || NM_001427 || || 2020 || hHR003567 || 1440778	-0.13	-0.2	-0.31	-0.81	-0.74	-0.8	-0.08	0.07	0.18	-0.13	-0.61	-0.39	-0.05	-0.51	0.455	0.12	0.01	0.18	-0.11	-0.48	-0.36	-0.17
6726	hSQ036711	|| || || || NM_003133 || || || hHR029525 || 1440782	-1.26	-1.14	-0.75	-1.34	-0.38	-0.49	-0.32	-0.46	0.07	0.53	-0.78	-0.2	-0.28	0.88	-0.945	-0.7	-0.96	-0.82	-0.15	-0.05	-1.33	0.36
51684	hSQ020626	|| SUFU || Suppressor of fused homolog (Drosophila) || Hs.404089 || NM_016169 || || 51684 || hHR010581 || 1440786	0.19	0.26	0.1	-0.37	-0.49	-0.26	0.19	0.15	-0.48	-0.21	-0.23	-0.7	0.02	-1.39	1.495	1.02	0.43	0.24	0.06	-0.47	0.29	0.6
1159	hSQ008215	|| CKMT1B || Creatine kinase, mitochondrial 1B || Hs.425633 || NM_020990 || || 1159 || hHR028974 || 1440833	0.58	0.46	0.74	0.49	0.2	-0.35	1.1	1.11	1.04	1.28	1.23	0.49	0.91	0.03	0.185	0.16	0.18	-0.14	-0.15	0.27	0.07	2.24
143243	hSQ008607	|| || || || XM_016093 || || || hHR029063 || 1440865	2.37	2.14	2.91	2.04	1.88	2.53	-0.32	-1.17	-0.66	-3	2.21	0.88	0.83	1.99	0.325	0.84	-0.07	-0.13	-0.47	0.13	1.13	2.52
51100	hSQ035895	|| SH3GLB1 || SH3-domain GRB2-like endophilin B1 || Hs.136309 || NM_016009 || || 51100 || hHR009863 || 1440904	-0.97	-0.84	-0.59	-0.97	-0.53	-0.61	-0.32	-0.35	-0.3	-0.04	-1.48	-0.47	0.11	-0.31	-0.885	-0.93	0.21	-0.26	0.56	0.47	-0.34	0.74
286167	hSQ042430	|| LOC286167 || Hypothetical protein LOC286167 || Hs.374257 || BX537506 || || 286167 || hHR025762 || 1440920	0.17	0.26	0.36	0.17	0.15	-0.33	-0.49	-0.5	-0.4	-0.47	-0.53	-0.65	-0.42	-1.82	0.515	0.19	0.13	0.12	-0.47	-1.48	0.01	-0.31
6389	hSQ017668	|| SDHA || Succinate dehydrogenase complex, subunit A, flavoprotein (Fp) || Hs.440475 || NM_004168 || || 6389 || hCM000934 || 1440935	0.05	0.31	-0.08	-0.1	-0.5	-0.55	0.4	0.31	-0.03	0.1	0.57	-0.56	0.46	-0.64	-1.165	-0.94	-1.26	-0.78	0.33	0.51	0.19	0.47
391670	hSQ008864	|| || || || XM_496703 || || || hHR027957 || 1440971	-1.27	-1.08	-1.37	-1.47	-1.25	-0.85	-2.92	-3.46	-3.3	-4.69	-1.18	-1.32	0.09	-1.13	-3.145	-2.66	-5.02	-3.41	-0.68	-2.68e-09	-2.42	-0.86
10671	hSQ004391	|| DCTN6 || Dynactin 6 || Hs.158427 || NM_006571 || || 10671 || hHR012188 || 1440979	-0.6	-0.28	-0.19	-0.4	1.95	0.48	0.54	0.53	0.17	0.47	-0.34	0.09	0.45	1.03	-1.115	-1.04	-1.35	-1.77	-0.01	-0.15	-1.54	0.47
1678	hSQ013853	|| TIMM8A || Translocase of inner mitochondrial membrane 8 homolog A (yeast) || Hs.447877 || NM_004085 || || 1678 || hHR029712 || 1440992	-1.69	-1.75	-0.82	-0.81	-0.96	-1.5	0.06	0.03	0.9	0.81	-9.54e-09	-0.24	-0.4	-0.17	0.575	0.47	0.63	0.33	-0.14	-0.36	0.14	-0.7
285442	hSQ019403	|| || || || XM_208320 || || || hHR031683 || 1441009	-0.63	-0.71	-0.54	-0.93	-1.09	-1	-1.03	-1.06	-0.45	-0.5	-1.17	-0.36	-0.16	-1.41	-0.485	-0.76	0.58	1.04	0.75	1.06	-0.04	0.92
3020	hSQ044635	|| H3F3A || H3 histone, family 3A || Hs.546259 || NM_002107 || || 3020 || hHR031149 || 1441094	-1.9	-1.68	-0.31	-1.07	-0.74	-0.81	0.44	0.07	0.5	0.8	-0.98	-0.69	-0.15	0.92	-0.115	0.11	-0.22	-0.68	0.05	-0.07	-0.85	1.35
3251	hSQ019370	|| HPRT1 || Hypoxanthine phosphoribosyltransferase 1 (Lesch-Nyhan syndrome) || Hs.412707 || NM_000194 || || 3251 || hCM001042 || 1441134	-1.89	-1.84	-1.36	-1.34	-1.16	-1.17	-0.24	-0.03	0.72	0.75	-0.48	-0.45	-0.56	0.18	0.095	-0.06	0.48	-0.05	0.6	0.68	-0.07	0.65
116150	hSQ024879	|| NUS1 || Nuclear undecaprenyl pyrophosphate synthase 1 homolog (S. cerevisiae) || Hs.289008 || NM_138459 || || 116150 || hHR030531 || 1441140	-1.15	-1.06	-1	-1.52	-0.8	-1.07	-1.38	-1.5	-0.74	-0.62	-1.38	-0.51	-0.19	0.2	-0.345	-0.72	0.14	-0.03	0.91	0.22	-0.4	1.35
331	hSQ024620	|| BIRC4 || Baculoviral IAP repeat-containing 4 || Hs.356076 || NM_001167 || || 331 || hHR028790 || 1441157	-1.84	-1.82	-1.26	-1.34	-1.14	-1.48	-1.97	-2.05	-1.82	-1.55	-2.01	-1.44	-1.53	-1.05	-0.495	-0.68	-0.85	-6.71e-10	-0.16	-0.18	0.06	-1.02
10051	hSQ007793	|| SMC4 || Structural maintenance of chromosomes 4 || Hs.58992 || NM_005496 || || 10051 || hHR004098 || 1441159	-0.46	-0.27	-0.76	-1.15	-0.61	-0.49	-0.65	-0.64	-1.03	-0.85	-1.33	-0.54	-0.61	0.36	-0.065	-0.15	-0.82	-0.04	1.07	0.44	-0.55	1.25
92270	hSQ032684	|| LOC92270 || Hypothetical protein LOC92270 || Hs.364045 || AK022625 || || 92270 || hHR012504 || 1441177	-1.69	-1.53	-0.64	-0.95	-2.02	-2.36	-1.98	-2.07	-1.66	-1.99	-1.43	-2.01	-1.34	-3.17	-1.195	-1.12	-1.41	-1.29	-1.31	-2.09	-0.9	-3.59
5878	hSQ003930	|| RAB5C || RAB5C, member RAS oncogene family || Hs.650382 || NM_201434 || || 5878 || hHR021059 || 1441189	0.89	0.68	1.27	0.85	0.61	0.97	-0.6	-0.45	-0.51	-1.37	0.77	-0.36	-0.25	-0.2	0.935	0.89	1.17	0.52	0.2	0.23	1.04	0.8
389156	hSQ021483	|| || || || XM_371668 || || || hHR029899 || 1441200	-1.2	-0.95	-0.78	-1.43	-1.11	-0.83	0.64	0.53	-0.02	0.44	-0.6	-0.66	-0.08	0.5	-0.555	-0.38	-1.36	-1.73	0.22	-0.05	-1.75	1
29882	hSQ040123	|| ANAPC2 || Anaphase promoting complex subunit 2 || Hs.533262 || NM_013366 || || 29882 || hHR027490 || 1441228	2.49	2.35	0.15	-0.24	2.13	2.58	0.59	0.61	0.32	0.34	1.91	1	0.23	2.21	1.085	1.15	0.9	0.72	0.1	-0.43	1.75	0.63
391039	hSQ036578	|| || || || XM_497673 || || || hHR027638 || 1441264	2.8	2.34	2.23	1.71	1.99	2.11	-0.44	-0.91	-1.64	-3.52	2.67	1.98	1.3	2.03	1.075	0.91	0.21	0.61	-0.23	1.53	1.35	3.09
51547	hSQ031082	|| SIRT7 || Sirtuin (silent mating type information regulation 2 homolog) 7 (S. cerevisiae) || Hs.514636 || NM_016538 || || 51547 || hHR031252 || 1441272	-0.6	-0.62	-0.42	-0.81	-0.48	-0.38	-0.56	-0.16	-0.53	-0.47	-0.24	-1.13	-0.27	-0.47	0.195	0.24	0.7	-0.15	0.45	-0.19	1.31	-0.17
522	hSQ038433	|| ATP5J || ATP synthase, H+ transporting, mitochondrial F0 complex, subunit F6 || Hs.246310 || NM_001685 || || 522 || hHR013418 || 1441275	-0.32	-0.67	-0.12	-0.34	0.06	-0.28	0.78	0.84	1.23	1.47	0.45	-0.21	0.11	0.5	-0.295	-0.3	-0.86	-0.66	-0.87	-0.29	-0.29	-0.07
23207	hSQ027064	|| PLEKHM2 || Pleckstrin homology domain containing, family M (with RUN domain) member 2 || Hs.646775 || BC040441 || || 23207 || hHR024179 || 1441292	0.53	0.79	0.61	0.57	0.37	0.6	-0.29	-0.45	-0.57	-0.57	-0.85	-0.8	-0.22	-1.71	1.395	1.05	1.3	0.44	0.63	0.29	1.65	1.57
55164	hSQ034559	|| SHQ1 || SHQ1 homolog (S. cerevisiae) || || || || 55164 || hHC029298 || 1458708	0.82	0.86	0.14	0.08	0.74	0.93	1.32	1.68	1.14	1.14	0.98	0.84	1.11	0.61	0.425	0.24	0.7	0.46	0.7	0.6	0.25	0.67
8896	hSQ028583	|| G10 || G10 protein || || || || 8896 || hHC019410 || 1458717	0.56	0.72	-0.01	-0.17	0.3	0.26	2.07	2.06	1.55	1.43	1.51	0.79	1.44	1.31	0.435	0.49	0.49	0.33	0.19	0.7	-0.35	0.13
3910	hSQ017669	|| LAMA4 || laminin, alpha 4 || || || || 3910 || hHC013376 || 1458730	0.03	0.13	-0.58	-0.65	-0.93	-0.92	-0.15	-0.17	-0.82	-0.77	-1.37	-0.67	-0.45	-1.67	-0.265	-0.27	-0.1	0.07	0.07	-0.14	-0.24	-0.59
55157	hSQ011601	|| DARS2 || aspartyl-tRNA synthetase 2 (mitochondrial) || || || || 55157 || hHC003687 || 1458731	-0.89	-0.68	-0.25	-0.76	-0.82	-1.14	-0.67	-1.11	-0.52	-0.12	-1.55	-0.68	-0.46	-1.06	-1.495	-1.71	-1.96	-1.56	-0.63	-1.05	-2.33	0.62
347862	hSQ014310	|| PDDC1 || Parkinson disease 7 domain containing 1 || || || || 347862 || hHC023062 || 1458738	-0.8	-0.85	-0.96	-1.64	-1.01	-1.04	-1.49	-1.14	-1.12	-1.42	-0.57	-2.15	-1.04	-2.08	-1.035	-1.28	-1.3	-2.24	-1.26	-1.35	-0.61	-2.2
5955	hSQ014935	|| RCN2 || reticulocalbin 2, EF-hand calcium binding domain || || || || 5955 || hHC011722 || 1458745	-0.23	0.13	0.09	0.68	0.47	1.14	1.05	0.94	1.06	0.1	0.35	0.57	0.53	1.06	-0.495	-0.42	-0.48	-0.46	-0.1	-0.02	-0.23	-0.63
3312	hSQ005212	|| HSPA8 || heat shock 70kDa protein 8 || || || || 3312 || hHA033261 || 1458762	1.36	1.43	-0.43	-0.68	1.11	1.1	2.46	2.24	1.26	1.15	1.66	0.96	1.72	1.22	0.485	0.56	0.7	-0.12	0.64	1.01	-0.43	1.28
11094	hSQ042289	|| C9orf7 || chromosome 9 open reading frame 7 || || || || 11094 || hHC032134 || 1458773	0.56	0.68	1.3	0.87	0.52	0.54	0.8	0.71	1.42	1.19	1	0.17	0.35	0.13	1.715	1.6	1.62	0.45	0.43	0.15	1.62	0.72
84326	hSQ013121	|| MGC13114 || hypothetical protein MGC13114 || || || || 84326 || hHC018897 || 1458776	0.49	0.22	0.96	0.43	0.82	0.68	1.45	1.45	1.41	1.26	1.44	0.45	0.25	0.99	1.625	1.63	1.03	0.3	-0.19	0.37	1.41	2.22
8878	hSQ036765	|| SQSTM1 || sequestosome 1 || || || || 8878 || hHC015710 || 1458780	0.73	0.72	0.55	0.38	0.9	0.94	0.64	0.41	0.64	0.69	0.48	0.15	0.81	0.64	0.825	1	1.39	1.53	1.36	1.56	2.14	1.12
11039	hSQ025226	|| SMA4 || SMA4 || || || || 11039 || hHC032141 || 1458783	-0.06	-0.34	-0.26	-0.46	-0.47	-0.21	-1.37	-1.57	-1.37	-1.79	-0.79	-1.09	-0.9	-1.72	-0.835	-0.81	-0.74	-1.2	-0.59	0.2	0.09	-0.65
64430	hSQ003901	|| C14orf135 || chromosome 14 open reading frame 135 || || || || 64430 || hHC003178 || 1458793	-0.5	-0.25	-0.54	-0.61	-0.33	-0.32	-0.55	-0.59	0.08	0.3	-0.6	-0.07	0.11	0.63	0.025	-0.08	0.03	0.07	0.52	0.29	-0.16	-0.19
11200	hSQ018138	|| CHEK2 || CHK2 checkpoint homolog (S. pombe) || || || || 11200 || hHC031181 || 1458796	-0.41	-0.51	-0.04	-0.34	-0.25	-0.54	0.03	0.1	0.6	0.62	-0.27	-0.31	-0.07	-0.37	0.135	-0.15	-0.02	-0.25	0.11	0.3	0.05	1.37
63906	hSQ045127	|| GPATC3 || G patch domain containing 3 || || || || 63906 || hHC019576 || 1458797	-0.57	-0.58	-0.27	-0.13	-0.23	0.13	-0.27	-0.24	-0.55	-0.64	-0.26	-0.98	-0.14	-0.88	-1.135	-0.88	-1.83	-1.99	-0.59	-0.33	0.02	0.24
2177	hSQ002363	|| FANCD2 || Fanconi anemia, complementation group D2 || || || || 2177 || hHA033321 || 1458809	0.88	0.99	0.3	0.13	0.34	0.51	-0.37	-0.51	-0.72	-0.6	-0.5	0.12	0.12	-0.88	-0.515	-0.04	-0.01	1.06	0.17	-0.14	0.07	-0.66
64960	hSQ006294	|| MRPS15 || mitochondrial ribosomal protein S15 || || || || 64960 || hHC025188 || 1458820	1.21	1.42	1	0.52	1.46	1.48	2.94	2.91	2.02	2.09	2.12	1.06	2.08	1.44	-0.305	-0.14	-0.98	-1.32	-0.38	-0.24	-1.11	0.22
NA	hSQ010764	|| || || || || || || hHA034463 || 1458828	1.03	1.02	0.81	0.7	0.86	0.4	-0.87	-0.7	-0.47	-0.51	-0.89	-0.2	0.62	-0.85	0.835	0.09	0.39	0.31	0.9	0.59	1.19	0.91
3485	hSQ026837	|| IGFBP2 || insulin-like growth factor binding protein 2, 36kDa || || || || 3485 || hHC022038 || 1458831	-0.17	-0.51	0.15	-0.51	-0.06	-0.05	1.09	0.94	0.72	-1.29	0.99	-1.02	-0.55	0.5	0.585	0.96	0.65	-0.54	-0.46	-0.17	1.81	0.38
122809	hSQ027964	|| SOCS4 || suppressor of cytokine signaling 4 || || || || 122809 || hHC003263 || 1458848	-2.1	-1.89	-1.68	-1.66	-1.01	-0.88	-1.81	-2	-1.31	-0.95	-2.07	-1.42	-1.16	-0.91	-0.785	-0.96	-0.79	-1.26	-0.38	-0.38	-0.53	-0.43
26872	hSQ017383	|| STEAP1 || six transmembrane epithelial antigen of the prostate 1 || || || || 26872 || hHC006334 || 1458851	-0.64	-0.4	-0.25	-0.35	0.35	0.58	1.36	1.21	0.78	0.94	0.47	0.41	0.1	0.84	-1.195	-0.4	-0.45	-1.62	-0.65	-0.46	-0.52	-0.12
NA	hSQ009082	|| MJ-1000-74_823_a_14_1 || || || || || || hCM046632 || 1458861	7.96	7.36	5.18	4.43	5.55	5.61	4.74	4.64	4.32	4.42	4.75	4.44	4.95	4.48	4.035	4.11	4.16	3.63	3.73	4.76	4.26	3.72
28512	hSQ030678	|| NKIRAS1 || NFKB inhibitor interacting Ras-like 1 || || || || 28512 || hHC013630 || 1458869	-0.79	-0.64	0.61	0.1	-0.26	0.06	-0.04	0.24	0.6	0.52	-0.31	0.01	0.18	-0.17	1.405	1.25	1.62	1.57	1.78	1.73	1.28	1.9
220074	hSQ041476	|| LRRC51 || leucine rich repeat containing 51 || || || || 220074 || hHC014550 || 1458873	0.12	0.06	0.31	0.06	0.14	0.17	0.49	0.73	0.73	0.9	0.24	-0.22	0.41	0.34	1.125	1.02	0.42	0.24	-0.03	-0.22	0.5	0.91
83879	hSQ008153	|| CDCA7 || cell division cycle associated 7 || || || || 83879 || hHC016868 || 1458882	0.11	0.15	-0.28	-0.19	0.05	0.31	0.18	0.66	0.35	0.39	-0.01	0.18	0.33	0.65	-0.465	-0.4	0.18	-0.08	-0.06	-0.16	0.18	-1.49e-09
55257	hSQ035557	|| C20orf20 || chromosome 20 open reading frame 20 || || || || 55257 || hHC006442 || 1458901	-0.79	-0.68	-0.42	-0.72	-0.78	-0.59	0.55	0.64	0.38	0.44	-0.36	-0.93	-0.05	-0.51	0.285	0.2	0.08	-0.24	0.17	-0.07	0.03	1
23199	hSQ033639	|| KIAA0182 || KIAA0182 || || || || 23199 || hHC012982 || 1458903	0.85	1.05	0.17	0.31	0.44	0.72	0.32	0.6	-0.76	-0.8	-1.08	-0.65	-0.1	-0.64	1.045	0.84	0.24	0.35	0.54	-0.22	0.25	-0.05
1020	hSQ016671	|| CDK5 || cyclin-dependent kinase 5 || || || || 1020 || hHC026390 || 1458930	-0.2	-0.15	0.35	0.02	0.76	0.4	0.84	0.86	0.67	0.86	0.41	0.14	0.37	0.05	0.695	0.52	0.53	0.36	-0.21	0.05	0.58	1.48
6799	hSQ005307	|| SULT1A2 || sulfotransferase family, cytosolic, 1A, phenol-preferring, member 2 || || || || 6799 || hHC030466 || 1458932	-1.24	-1.42	-1.29	-1.53	-1.76	-1.73	-0.43	-0.7	-1.09	-1.25	-0.8	-1.88	-1.22	-1.62	0.725	0.85	0.51	-0.24	0.79	0.41	1.19	1.4
23590	hSQ039948	|| PDSS1 || prenyl (decaprenyl) diphosphate synthase, subunit 1 || || || || 23590 || hHC029458 || 1458947	-0.06	-0.14	-0.62	-0.79	0.24	0.15	0.39	0.53	0.82	0.69	0.38	0.1	-0.05	0.12	0.815	0.98	1.73	0.95	0.93	1.36	1.29	0.58
84191	hSQ043044	|| FAM96A || family with sequence similarity 96, member A || || || || 84191 || hHA032609 || 1458949	-0.82	-0.81	-0.91	-0.8	0.18	0.23	0.61	0.41	0.65	0.86	0.42	0.25	0.15	1.34	-0.625	-0.53	-0.75	-0.54	-0.53	0.02	-0.73	-0.24
8440	hSQ041848	|| NCK2 || NCK adaptor protein 2 || || || || 8440 || hHC009611 || 1458953	0.08	-0.02	-0.47	-0.48	-0.44	-0.27	0.53	0.53	0.15	0.37	-0.33	-0.94	0.37	-0.82	-1.255	-1.23	-1.78	-1.4	-0.51	-1.22	-1.02	-0.69
11124	hSQ014710	|| FAF1 || Fas (TNFRSF6) associated factor 1 || || || || 11124 || hHC021636 || 1458954	1.4	1.52	0.97	0.71	1.27	1.26	1.41	1.34	0.92	0.8	1.24	0.79	1.58	0.53	0.545	0.53	0.53	0.32	0.68	0.4	0.77	0.59
23162	hSQ031524	|| MAPK8IP3 || mitogen-activated protein kinase 8 interacting protein 3 || || || || 23162 || hHC023670 || 1458955	-0.76	-0.9	-1.16	-1.56	-0.89	-1.59	-0.55	-0.85	-2.02	-2.95	-1.63	-2.32	-1.87	-3.16	1.385	1.4	0.63	-0.45	0.31	-1.12	0.93	-1.07
8237	hSQ001102	|| USP11 || ubiquitin specific peptidase 11 || || || || 8237 || hHC023126 || 1458981	0.83	0.55	-0.06	-0.3	-0.35	-0.52	-0.65	-0.77	-0.84	-0.55	-0.29	-1.18	0.25	-1.27	-1.765	-1.63	-2.46	-1.45	-0.93	-0.56	-0.43	0.66
253639	hSQ021871	|| ZNF620 || zinc finger protein 620 || || || || 253639 || hHC010831 || 1458989	-1.55	-1.41	-0.99	-0.77	-1.76	-1.81	-1.52	-1.91	-1.36	-2.5	-2.15	-1.24	-0.96	-2.12	-1.385	-1.39	-0.82	-0.87	0.44	0.16	-0.46	0.88
84993	hSQ039190	|| UBL7 || ubiquitin-like 7 (bone marrow stromal cell-derived) || || || || 84993 || hHC023133 || 1458990	0.87	0.7	1.13	0.82	1.49	1.09	1.3	1.26	1.16	1.09	1.54	0.36	1.31	1.25	1.795	1.91	1.23	0.78	0.45	0.59	1.7	2.84
91368	hSQ008040	|| MGC13017 || similar to RIKEN cDNA A430101B06 gene || || || || 91368 || hHC029616 || 1458997	-1.01	-0.71	-0.36	-0.69	-0.3	-0.15	-1.09	-1.48	-0.79	-0.73	-0.88	-0.95	-0.85	-0.33	-0.815	-0.58	-0.26	-0.5	-0.34	-0.06	-0.64	0.5
27248	hSQ000379	|| C2orf30 || chromosome 2 open reading frame 30 || || || || 27248 || hHC007486 || 1458998	0.63	0.71	0.37	0.11	1	1.21	1.27	1.63	0.76	0.8	0.49	0.65	0.83	0.81	-0.015	-0.01	-0.39	-0.05	0.43	0.25	0.39	1.35
122060	hSQ011242	|| FLJ30046 || hypothetical protein FLJ30046 || || || || 122060 || hHC003820 || 1459025	-0.49	-0.36	-0.44	-0.5	0.19	0.22	-0.23	-2.38e-09	-0.13	0.35	-0.69	-0.03	-0.18	0.56	0.615	0.54	0.79	0.28	0.75	0.63	0.52	1.87
221120	hSQ025229	|| ALKBH3 || alkB, alkylation repair homolog 3 (E. coli) || || || || 221120 || hHC018035 || 1459027	1	1.15	0.89	0.75	1.23	1.12	2.39	2.19	1.53	1.73	1.4	0.91	1.76	0.68	0.145	-0.21	-0.51	-0.57	-0.13	-0.07	-0.3	-1.49e-09
155400	hSQ030856	|| NSUN5B || NOL1/NOP2/Sun domain family, member 5B || || || || 155400 || hHC032237 || 1459035	-0.44	-0.63	0.02	-0.52	-0.09	-0.48	-0.61	-0.76	-0.7	-0.81	0.09	-0.81	-0.72	0.01	0.115	0.12	-0.02	-0.64	-0.42	0.08	1.2	0.59
80003	hSQ019943	|| PCNXL2 || pecanex-like 2 (Drosophila) || || || || 80003 || hHA037510 || 1459041	0.21	0.26	-0.22	-0.12	-0.31	-0.52	-1.12	-1.85	-1.93	-2.5	-2.44	-1.09	-1.14	-2.89	0.385	0.38	0.63	0.74	0.23	-0.71	0.87	0.31
439	hSQ008893	|| ASNA1 || arsA arsenite transporter, ATP-binding, homolog 1 (bacterial) || || || || 439 || hHC023213 || 1459045	-0.22	-0.42	-0.06	-0.11	0.15	-0.14	0.62	0.68	0.48	0.41	1.33	-0.14	-0.4	0.61	0.405	0.43	0.41	-0.16	0.46	0.85	1.21	2.97
55746	hSQ025814	|| NUP133 || nucleoporin 133kDa || || || || 55746 || hHC007601 || 1459056	0.28	0.52	-0.84	-0.88	-0.39	-0.36	-0.08	0.06	0.21	0.26	0.22	0.13	0.22	0.65	0.505	0.34	0.72	1.1	0.69	0.58	0.73	0.04
10627	hSQ043203	|| MRCL3 || myosin regulatory light chain MRCL3 || || || || 10627 || hHC019634 || 1459057	-0.45	-0.43	-0.13	-0.12	0.19	-0.27	0.8	0.84	0.9	1.25	0.53	0.42	0.22	0.47	0.225	0.11	0.53	0.22	-0.05	0.21	-0.2	1.1
5690	hSQ029141	|| PSMB2 || proteasome (prosome, macropain) subunit, beta type, 2 || || || || 5690 || hHA037095 || 1459071	0.45	0.26	-0.26	0.23	0.05	-0.1	0.56	0.47	1.16	1.26	0.98	0.81	0.37	0.7	0.825	0.51	1.42	0.97	0.77	1.96	0.6	0.21
65095	hSQ030236	|| FLJ12949 || hypothetical protein FLJ12949 || || || || 65095 || hHC021243 || 1459088	-0.3	-0.1	-0.73	-1.11	-0.55	-0.39	-0.14	0.07	-2	-1.92	-1.24	-1.56	-0.69	-2.49	-0.715	-1.18	-1.21	-2.41	-1.61	-2.38	-0.95	-2.42
6567	hSQ029462	|| SLC16A2 || solute carrier family 16 (monocarboxylic acid transporters), member 2 || || || || 6567 || hHC009198 || 1459095	0.77	0.83	0.61	0.57	0.83	0.49	-0.14	-0.18	-0.12	0.17	0.02	0.23	0.52	-0.05	-0.775	-0.57	-0.82	-0.81	-0.65	-0.72	-0.92	-0.28
27250	hSQ045538	|| PDCD4 || programmed cell death 4 (neoplastic transformation inhibitor) || || || || 27250 || hHC010121 || 1459099	-1.5	-1.49	-0.78	-1.32	-1.27	-1.26	-1.39	-1.57	-1.2	-1.06	-2.02	-1.15	-0.59	-0.56	-1.475	-1.6	-1.59	-1.09	2.24e-10	-0.43	-1.2	0.44
131601	hSQ014779	|| GPR175 || G protein-coupled receptor 175 || || || || 131601 || hHC017523 || 1459104	0.11	5.96e-09	1.16	0.68	0.35	0.51	-0.25	-0.23	0.31	-0.15	0.3	-0.13	0.04	0.01	1.595	1.58	1.52	0.93	0.37	0.58	1.67	2.37
3633	hSQ015005	|| INPP5B || inositol polyphosphate-5-phosphatase, 75kDa || || || || 3633 || hHC011982 || 1459106	-0.43	-0.23	-0.33	-0.53	-0.32	-0.5	-1.25	-1.59	-1.38	-1.31	-1.17	-0.99	-0.53	-0.97	0.665	0.5	0.4	0.37	0.72	0.43	0.78	1.05
1415	hSQ044344	|| CRYBB2 || crystallin, beta B2 || || || || 1415 || hHC031444 || 1459111	-1	-1.25	-1.02	-0.71	-0.77	-1.26	-1.11	-0.67	-0.9	-0.94	-1.03	-1.37	-0.52	-2.18	-1.245	-1.29	-2.05	-2.19	-0.44	-0.29	-0.92	-0.41
29117	hSQ025335	|| BRD7 || bromodomain containing 7 || || || || 29117 || hHA033427 || 1459114	0.34	0.28	-0.97	-0.76	-0.51	-0.72	0.21	0.39	-1.1	-1.68	-0.48	-0.85	0.64	-1.01	-2.895	-2.88	-3.17	-2.63	-1.67	-1.49	-2.51	-2.22
54407	hSQ001269	|| SLC38A2 || solute carrier family 38, member 2 || || || || 54407 || hHC001832 || 1459120	-0.88	-0.7	-1.02	-1.16	-0.66	-0.55	-0.64	-1.06	-0.83	-0.7	-0.94	-0.43	-0.42	0.76	0.165	0.23	-0.44	0.01	0.59	0.32	-0.42	0.28
375601	hSQ005695	|| OR7E31P || olfactory receptor, family 7, subfamily E, member 31 pseudogene || || || || 375601 || hHC031461 || 1459121	0.59	0.38	0.4	0.33	0.77	0.43	0.96	0.79	1.59	0.96	1.25	0.44	0.24	1.2	1.505	1.61	1.22	0.92	0.14	1.06	1.28	0.68
10922	hSQ041673	|| FASTK || Fas-activated serine/threonine kinase || || || || 10922 || hHA040578 || 1459143	-0.67	-0.69	0.43	0.04	-0.28	-0.6	0.57	0.24	0.54	0.45	0.18	-0.96	-0.28	-0.58	1.365	1.68	1.72	0.9	0.52	0.37	2.04	2.28
51388	hSQ036298	|| NIP7 || nuclear import 7 homolog (S. cerevisiae) || || || || 51388 || hHA033015 || 1459156	-0.12	-0.22	-0.29	-0.14	0.22	-0.08	0.18	0.04	0.23	-0.05	0.45	0.29	0.42	0.26	-0.615	-0.47	-0.57	-0.42	-0.22	0.63	-0.13	0.6
4691	hSQ022128	|| NCL || nucleolin || || || || 4691 || hHC025414 || 1459195	0.11	0.16	-0.2	-0.68	0.09	-0.1	-1.52	-1.7	-2.37	-2.94	-0.99	-0.97	-1.73	-2.42	-2.465	-3.01	-2.62	-2.25	-3.53	-1.64	-1.28	-3.89
8273	hSQ014495	|| SLC10A3 || solute carrier family 10 (sodium/bile acid cotransporter family), member 3 || || || || 8273 || hHC022272 || 1459204	0.25	0.42	1.18	0.74	0.8	0.74	0.12	0.1	0.29	0.44	0.56	2.98e-09	0.3	-0.33	1.245	1.28	1.1	0.7	0.26	-0.11	1.14	1.44
7150	hSQ017550	|| TOP1 || topoisomerase (DNA) I || || || || 7150 || hHC030604 || 1459209	0.58	0.78	-0.15	-0.23	0.55	0.96	0.1	-0.07	-1.93	-2.1	-1	-0.27	-0.02	-0.56	-1.835	-1.64	-1.96	-1.57	-0.62	-0.78	-1.94	-0.23
84364	hSQ026764	|| ZNF289 || zinc finger protein 289, ID1 regulated || || || || 84364 || hHC022278 || 1459213	0.17	0.12	0.31	-0.27	-0.01	0.17	-0.11	-0.01	-0.01	-0.03	0.04	-0.56	0.53	-0.42	1.685	1.55	1.31	0.92	1.02	0.66	1.42	1.45
3682	hSQ042780	|| ITGAE || integrin, alpha E (antigen CD103, human mucosal lymphocyte antigen 1; alpha polypeptide) || || || || 3682 || hHA036802 || 1459215	-1.06	-0.98	-0.47	-0.7	-0.11	0.42	0.22	-0.2	1.08	1.17	0.16	0.04	0.26	1.76	0.285	0.61	0.19	-0.17	-0.49	0.12	0.15	-0.24
65265	hSQ028926	|| C8orf33 || chromosome 8 open reading frame 33 || || || || 65265 || hHC013163 || 1459225	-0.62	-0.71	-0.58	-1.23	-0.31	-0.13	0.69	0.75	0.41	0.41	0.3	-0.65	0.58	0.66	-0.325	-0.24	-0.26	-0.69	-0.07	-0.08	-0.19	-0.27
80232	hSQ032495	|| WDR26 || WD repeat domain 26 || || || || 80232 || hHC004404 || 1459229	-0.01	0.34	0.05	0.05	0.43	0.53	0.61	0.71	0.11	0.32	-0.48	-0.03	0.21	-0.06	0.545	0.59	0.99	0.8	1.23	1.03	0.99	1.53
6609	hSQ007198	|| SMPD1 || sphingomyelin phosphodiesterase 1, acid lysosomal (acid sphingomyelinase) || || || || 6609 || hHC018632 || 1459232	0.07	0.12	0.08	-0.2	-0.24	-0.1	0.57	0.37	0.33	0.08	0.39	-0.47	0.52	-0.27	1.385	1.31	1.65	1.38	1.1	0.44	1.41	0.85
9873	hSQ026479	|| FCHSD2 || FCH and double SH3 domains 2 || || || || 9873 || hHC014792 || 1459242	0.25	0.17	-0.2	-0.13	-0.55	-0.39	-0.08	0.05	0.16	-0.12	-0.4	-0.54	0.37	-0.23	0.425	0.13	0.46	0.57	0.4	-0.07	0.07	0.36
5881	hSQ001493	|| RAC3 || ras-related C3 botulinum toxin substrate 3 (rho family, small GTP binding protein Rac3) || || || || 5881 || hHC026619 || 1459243	-1.76	-2.35	-1.11	-0.12	-1.35	-0.73	-1.88	-1.94	-2.7	-5.28	-0.2	-1.51	-2.87	-0.88	-0.335	0.01	-0.09	-1.78	-1.41	-0.63	-0.96	-1.66
483	hSQ001236	|| ATP1B3 || ATPase, Na+/K+ transporting, beta 3 polypeptide || || || || 483 || hHC030713 || 1459245	-0.95	-0.8	-0.46	-0.78	-0.24	-0.45	-0.12	-0.19	-0.25	0.32	-0.64	-0.14	0.18	-0.74	-0.685	-0.89	-1.04	-1.23	-0.31	-0.15	-1.4	0.49
390	hSQ022731	|| RND3 || Rho family GTPase 3 || || || || 390 || hHC005967 || 1459246	-0.36	-0.4	-0.98	-0.73	-0.88	-0.9	-0.01	-0.02	0.63	0.75	-0.3	-0.06	-0.07	0.14	-0.125	-0.63	-0.07	0.04	-0.06	-0.07	-0.56	-1.06
23411	hSQ033045	|| SIRT1 || sirtuin (silent mating type information regulation 2 homolog) 1 (S. cerevisiae) || || || || 23411 || hHC026626 || 1459250	-0.49	-0.36	-0.62	-0.68	-0.01	0.47	-0.04	-0.3	0.04	-0.17	-0.44	0.08	-0.29	0.66	0.685	0.71	0.56	0.72	0.82	0.35	0.71	0.24
55858	hSQ012573	|| TPARL || TPA regulated locus || || || || 55858 || hHC017124 || 1459251	-0.02	0.08	-0.42	-0.7	0.16	0.03	0.08	-0.16	-0.05	-0.48	0.38	-0.19	0.16	0.6	0.065	0.57	0.45	0.41	0.41	0.54	0.79	0.67
4052	hSQ004036	|| LTBP1 || latent transforming growth factor beta binding protein 1 || || || || 4052 || hHC010919 || 1459261	-0.51	-0.42	-0.76	-0.85	-0.53	-0.21	-0.04	-0.06	0.01	-0.46	-1.38	-0.36	-0.42	-0.95	-0.265	-0.21	-0.52	0.06	-0.35	-0.88	-0.49	-1.03
23376	hSQ009032	|| KIAA0776 || KIAA0776 || || || || 23376 || hHC002328 || 1459269	-1	-0.86	-1.82	-1.61	-1.06	-1.32	-1.25	-1.11	-0.39	-0.55	-1.72	-0.72	-0.76	-0.15	-0.605	-0.76	-1.12	-0.39	0.52	0.04	-0.42	-0.75
5437	hSQ024635	|| POLR2H || polymerase (RNA) II (DNA directed) polypeptide H || || || || 5437 || hHC016485 || 1459271	-0.63	-0.56	0.43	0.07	0.08	-0.07	1.17	0.88	1.14	1.04	1.05	0.17	0.4	0.81	0.705	0.71	0.47	-0.07	0.09	0.35	0.19	0.93
200933	hSQ026964	|| FBXO45 || F-box protein 45 || || || || 200933 || hHC012605 || 1459296	-0.91	-0.76	-0.99	-0.98	-0.54	-0.56	-0.64	-0.53	-0.31	-0.19	-0.83	-0.39	-0.31	-0.09	0.105	-0.02	-0.19	0.31	0.22	0.4	0.02	0.68
3308	hSQ022656	|| HSPA4 || heat shock 70kDa protein 4 || || || || 3308 || hHA035393 || 1459313	-0.91	-0.71	-1.46	-1.73	-0.36	-0.32	0.35	-0.06	-1.04	-0.72	-1.23	-0.81	0.04	-0.33	-2.035	-2.11	-2.42	-2.53	-0.22	-0.22	-2.77	0.63
79710	hSQ025934	|| MORC4 || MORC family CW-type zinc finger 4 || || || || 79710 || hHC002409 || 1459318	0.48	0.51	-0.26	-0.3	-0.36	0.05	0.6	0.63	-0.24	-0.1	-0.2	-0.32	0.3	-0.27	-0.095	-0.25	-0.62	-0.45	0.04	-0.42	-0.45	0.05
83862	hSQ024483	|| TMPIT || transmembrane protein induced by tumor necrosis factor alpha || || || || 83862 || hHC016555 || 1459320	-0.29	-0.41	-0.18	-0.64	-0.25	-0.07	0.79	0.83	0.23	0.34	0.14	-0.99	-0.05	-0.14	0.685	0.63	0.36	-0.49	-0.34	-0.53	0.47	0.36
83719	hSQ007546	|| YPEL3 || yippee-like 3 (Drosophila) || || || || 83719 || hHC002415 || 1459326	-0.43	-0.72	-0.27	-0.84	-0.84	-0.83	0.56	0.56	0.55	0.53	0.41	-0.75	0.26	-0.26	1.035	0.9	0.32	0.04	0.25	0.01	0.35	2.38
2963	hSQ034140	|| GTF2F2 || general transcription factor IIF, polypeptide 2, 30kDa || || || || 2963 || hHC029882 || 1459330	0.42	0.56	-0.02	0.16	0.65	0.59	0.43	-0.95	0.61	0.29	0.68	0.82	0.12	0.31	-1.175	-1.36	-0.39	-0.07	-0.56	0.16	-0.86	-0.89
26973	hSQ029394	|| CHORDC1 || cysteine and histidine-rich domain (CHORD)-containing 1 || || || || 26973 || hHC029896 || 1459340	-2.3	-1.93	-1.24	-1.82	-1.02	-1.19	-0.89	-0.97	-0.94	-0.39	-2	-0.83	-0.89	-0.74	0.265	0.17	0.5	-0.15	1.51	1.28	-0.93	0.61
51634	hSQ004670	|| RBMX2 || RNA binding motif protein, X-linked 2 || || || || 51634 || hHC026902 || 1459350	-0.44	-0.41	0.1	-0.54	-0.68	-0.44	0.94	1.49	0.24	0.3	-0.47	-0.86	0.46	-0.45	-0.375	-0.6	-1.62	-1.5	-0.41	-0.8	-0.45	-2.04
29090	hSQ009441	|| C18orf55 || chromosome 18 open reading frame 55 || || || || 29090 || hHC023328 || 1459370	-1.28	-1.34	-0.99	-0.97	-0.81	-1.15	-0.78	-0.36	-0.55	-1.31	-0.58	-0.83	-0.2	-0.67	-1.515	-1.15	-0.79	-1.31	-0.4	-0.11	-1.26	-0.58
89781	hSQ006188	|| HPS4 || Hermansky-Pudlak syndrome 4 || || || || 89781 || hHC009256 || 1459376	-0.24	0.01	-0.48	-0.59	-0.66	-0.32	-0.44	-0.42	-0.51	-0.29	-1.16	-0.86	-0.23	-1.23	-1.155	-1.24	-1.59	-1.31	-0.8	-0.85	-1.19	-0.99
23118	hSQ008519	|| MAP3K7IP2 || mitogen-activated protein kinase kinase kinase 7 interacting protein 2 || || || || 23118 || hHC005534 || 1459394	-0.33	-0.13	-0.48	-0.5	-0.3	-0.39	-0.59	-0.37	-0.34	-0.2	-0.9	-0.01	0.01	-0.17	-0.115	-0.47	0.02	0.33	0.58	0.42	-0.09	0.38
9589	hSQ034621	|| WTAP || Wilms tumor 1 associated protein || || || || 9589 || hHC007734 || 1459396	0.55	0.64	0.22	-0.08	0.43	0.6	1.51	1.81	0.58	0.57	0.52	-0.01	0.55	0.03	1.175	1	1.37	1.08	0.76	0.62	1.25	1.68
80742	hSQ017020	|| PRR3 || proline rich 3 || || || || 80742 || hHC019799 || 1459398	3.56	3.3	1.89	1.48	1.68	1.9	1.79	1.87	2.24	2.37	1.75	0.71	1.16	0.7	2.445	2.17	1.82	1.85	1.25	1.17	2.15	2.48
26118	hSQ010479	|| WSB1 || WD repeat and SOCS box-containing 1 || || || || 26118 || hHC010469 || 1459401	-1.54	-1.46	-1.02	-1.59	-1.96	-1.94	-1.85	-1.99	-1.5	-1.57	-2.32	-1.85	-0.92	-2.06	-1.065	-1.38	-1.02	-0.88	-0.53	-0.76	-1.05	-0.41
27342	hSQ031713	|| RABGEF1 || RAB guanine nucleotide exchange factor (GEF) 1 || || || || 27342 || hHC010474 || 1459409	0.15	0.19	-0.31	-0.31	0.36	0.56	1.04	1.31	0.14	0.21	0.23	0.12	0.48	0.32	1.475	1.14	1.03	1.16	0.93	0.54	0.98	0.56
9731	hSQ017055	|| RP1-286D6.4 || glycine-, glutamate-, thienylcyclohexylpiperidine-binding protein || || || || 9731 || hHC024870 || 1459411	0.33	0.63	-0.22	-0.33	-0.28	-0.36	-0.31	-0.28	-0.9	-0.89	-0.65	-0.81	-0.05	-1.8	-3.385	-2.82	-2.5	-1.74	-1.15	-1.27	-1.75	-1.58
79960	hSQ009572	|| PHF17 || PHD finger protein 17 || || || || 79960 || hHC010306 || 1459438	-1.14	-1	-0.68	-1.31	-1.77	-1.84	-1.73	-1.68	-2.05	-2.04	-2.42	-2.13	-1.06	-2.44	-1.355	-1.43	-1.77	-1.47	-0.68	-1.06	-1.09	-0.74
54187	hSQ013679	|| NANS || N-acetylneuraminic acid synthase (sialic acid synthase) || || || || 54187 || hHC010587 || 1459458	-0.66	-0.83	-0.91	-0.93	-0.45	-0.56	-0.25	-0.53	-0.5	-0.72	-0.28	-0.77	-0.11	0.26	-1.705	-1.54	-2.08	-2.2	-0.75	-0.15	-0.68	-0.43
11057	hSQ021127	|| ABHD2 || abhydrolase domain containing 2 || || || || 11057 || hHC013869 || 1459464	0.68	0.78	0.85	0.38	1.12	1.23	1.07	1.02	0.64	0.89	1.09	0.33	0.99	0.19	1.105	1.14	1.36	0.87	0.55	0.23	0.58	0.64
257415	hSQ027868	|| MGC40405 || hypothetical protein MGC40405 || || || || 257415 || hHC019268 || 1459476	-1.41	-1.37	-1.45	-1.54	-0.99	-1.08	0.67	1.04	-0.31	-0.34	-1.38	-0.78	-0.39	-0.54	0.735	0.57	0.43	0.8	1.14	0.76	0.48	0.89
1998	hSQ037064	|| ELF2 || E74-like factor 2 (ets domain transcription factor) || || || || 1998 || hHA033114 || 1459477	-0.22	-0.12	0.18	0.27	0.33	0.16	0.04	-1.33	-0.74	-1.07	-1.2	0.13	-0.6	-0.53	-1.325	-1.39	-0.83	-0.44	-0.36	-0.05	-0.63	-0.5
27301	hSQ043486	|| APEX2 || APEX nuclease (apurinic/apyrimidinic endonuclease) 2 || || || || 27301 || hHC019277 || 1459482	0.7	0.53	0.89	0.22	0.7	0.3	0.56	0.6	0.44	0.64	0.62	2.98e-09	0.28	0.11	1.145	1.12	0.68	0.74	-0.04	0.17	1.13	2
9857	hSQ029039	|| CEP350 || centrosomal protein 350kDa || || || || 9857 || hHC013226 || 1459490	0.75	0.73	0.43	0.45	1.21	0.87	-1.2	-1.14	-1.1	-1.13	-1.22	-0.22	-1.11	-0.79	0.035	0.06	-0.32	0.79	-0.08	-0.14	0.33	-1.06
8826	hSQ013394	|| IQGAP1 || IQ motif containing GTPase activating protein 1 || || || || 8826 || hHC027728 || 1459500	1.22	1.62	0.41	0.9	1.11	1.57	-0.33	-0.48	-0.48	-1.02	-0.44	0.29	-0.24	0.75	-1.015	-0.87	-1.74	-0.4	0.19	0.3	-0.4	-0.84
1105	hSQ030969	|| CHD1 || chromodomain helicase DNA binding protein 1 || || || || 1105 || hHC004466 || 1459501	7.15e-09	0.02	-0.94	-0.65	-0.18	-0.16	-0.39	-0.26	-0.71	-0.42	-0.79	-0.26	-0.65	0.09	-0.025	-0.49	-0.55	0.18	0.33	0.01	-0.17	0.31
122953	hSQ019334	|| JDP2 || jun dimerization protein 2 || || || || 122953 || hHC006629 || 1459502	0.55	0.53	0.52	-0.09	-0.32	-0.46	0.24	0.18	-0.53	-0.48	0.12	-0.69	-0.19	-1.3	0.475	0.33	-0.21	-0.09	0.64	-0.32	0.13	0.57
80023	hSQ007594	|| C20orf98 || chromosome 20 open reading frame 98 || || || || 80023 || hHC020891 || 1459505	3.72	3.39	3.43	2.37	3.46	3.13	3.73	3.51	3.49	3.19	3.59	2.2	2.85	2.56	2.795	2.73	2.09	1.94	0.7	0.79	2.14	4.04
83642	hSQ015770	|| RP3-402G11.5 || selenoprotein O || || || || 83642 || hHC020896 || 1459512	-0.89	-0.99	-0.44	-0.69	-0.66	-0.59	-0.21	-0.11	-1.09	-0.96	-0.23	-1.45	-0.6	-1.02	0.945	1.27	0.98	-6.71e-10	0.14	-0.49	2.03	0.96
7920	hSQ017683	|| BAT5 || HLA-B associated transcript 5 || || || || 7920 || hHC002970 || 1459519	-0.4	-0.32	-0.1	-0.02	0.65	-0.02	-0.34	-0.58	-0.62	-0.04	-0.72	-0.41	-0.27	0.38	0.465	0.72	0.67	-0.07	0.4	0.27	1.33	1.27
2339	hSQ032466	|| FNTA || farnesyltransferase, CAAX box, alpha || || || || 2339 || hHC030852 || 1459523	-1.13	-0.97	-0.73	-1.38	-1.02	-1.43	-0.68	-0.53	-0.28	-0.12	-0.53	-0.71	-0.32	-0.33	-0.215	-0.2	0.4	0.42	0.9	0.78	0.16	1.69
84864	hSQ028103	|| MINA || MYC induced nuclear antigen || || || || 84864 || hHC017182 || 1459532	-0.66	-0.8	-0.95	-0.78	-0.48	-0.77	-1.02	-0.95	-0.69	-1.07	-0.91	-0.53	0.09	-0.57	-1.925	-1.79	-1.79	-1.35	-0.32	-0.07	-0.82	0.16
7917	hSQ037876	|| BAT3 || HLA-B associated transcript 3 || || || || 7917 || hHA039084 || 1459546	1.97	1.86	1.69	1.36	1.67	1.53	1.59	1.66	1.22	0.73	1.6	0.65	1.42	0.62	1.085	1.13	0.56	0.6	0.55	0.17	1.18	2.41
26580	hSQ037219	|| BSCL2 || Bernardinelli-Seip congenital lipodystrophy 2 (seipin) || || || || 26580 || hHC018764 || 1459550	0.87	0.69	0.58	0.91	0.49	0.76	-0.08	-0.72	-0.15	-1.97	1.31	0.42	0.49	0.62	1.725	1.81	1.37	0.97	0.71	1.04	1.54	2.23
55227	hSQ005510	|| LRRC1 || leucine rich repeat containing 1 || || || || 55227 || hHA034320 || 1459553	0.04	0.18	-0.31	-0.38	0.15	0.07	0.03	0.36	0.48	0.46	-0.13	0.17	0.54	0.46	0.245	0.12	0.2	0.62	0.76	0.19	0.15	0.79
2475	hSQ007669	|| FRAP1 || FK506 binding protein 12-rapamycin associated protein 1 || || || || 2475 || hHC004544 || 1459558	0.01	0.01	-0.91	-0.89	-0.51	-0.45	-0.68	-1.01	-1.57	-1.81	-1.61	-1.01	-0.74	-1.03	-0.405	-0.36	-0.41	-0.44	0.78	-0.12	-0.68	-1.24
51319	hSQ037426	|| RSRC1 || arginine/serine-rich coiled-coil 1 || || || || 51319 || hHA038025 || 1459569	-1.12	-1.15	-1.52	-1.22	-1.37	-1.59	1.01	0.33	-0.63	-1.04	-0.51	-0.76	-0.34	-2.05	-2.355	-2.37	-4.53	-2.54	-0.87	-1.32	-2.59	-1.88
56900	hSQ020982	|| C1orf119 || chromosome 1 open reading frame 119 || || || || 56900 || hHC030987 || 1459572	-0.98	-0.87	-0.59	-0.4	-0.8	-0.61	-0.81	-0.69	0.16	0.4	-0.55	-0.29	-0.34	-0.34	0.875	0.66	1.55	1.16	1.14	1.36	0.96	1.74
5095	hSQ026005	|| PCCA || propionyl Coenzyme A carboxylase, alpha polypeptide || || || || 5095 || hHC008331 || 1459576	-1.22	-1.04	-0.94	-0.84	-0.97	-1.45	-0.73	-0.84	-0.83	-0.27	-0.86	-0.68	-0.47	-1.04	-0.365	-0.38	0.03	0.05	0.33	0.18	-0.43	0.26
1781	hSQ002871	|| DYNC1I2 || dynein, cytoplasmic 1, intermediate chain 2 || || || || 1781 || hHC031002 || 1459582	1.65	1.67	0.5	0.8	1.72	1.69	1.83	2.27	0.5	0.32	1.05	1.34	1.4	1.27	-0.565	-0.59	-0.52	-0.23	0.01	0.48	0.07	0.19
253558	hSQ012769	|| LYCAT || lysocardiolipin acyltransferase || || || || 253558 || hHC002480 || 1459598	-0.34	-0.2	-0.52	-0.47	0.01	-0.05	-0.16	0.14	0.17	0.15	-0.78	0.19	-1.34e-09	0.24	0.475	0.17	-0.09	-0.18	0.11	0.11	-0.26	0.23
6457	hSQ041882	|| SH3GL3 || SH3-domain GRB2-like 3 || || || || 6457 || hHC009926 || 1459606	-0.52	-0.55	-0.16	-0.63	-0.18	-0.11	0.22	0.11	0.32	0.5	-0.48	-0.45	0.09	-0.52	-0.905	-1.36	-0.85	-0.72	-0.11	-0.56	-0.47	-0.21
7703	hSQ041387	|| PCGF2 || polycomb group ring finger 2 || || || || 7703 || hHC021934 || 1459607	3.77	3.7	2.99	1.92	3.3	3.16	3.3	3.36	2.72	2.83	3.06	2.52	3.04	2.75	1.885	2.09	1.47	1.15	0.4	-0.15	1.65	1.6
10280	hSQ030242	|| OPRS1 || opioid receptor, sigma 1 || || || || 10280 || hHA032825 || 1459611	0.49	0.09	0.36	0.37	1.08	0.79	-2.85	-3.05	-2.78	-2.98	1.59	-0.27	-0.1	0.94	-0.175	0.02	0.95	-0.41	-0.28	0.54	1.22	1.5
84899	hSQ020751	|| TMTC4 || transmembrane and tetratricopeptide repeat containing 4 || || || || 84899 || hHC004054 || 1459623	-0.21	-0.14	-0.45	-0.53	-0.39	-0.42	-0.46	0.06	0.82	0.67	-0.21	0.13	0.29	0.44	0.015	-0.34	-0.14	0.48	0.55	0.16	-0.13	-0.19
10966	hSQ029709	|| RAB40B || RAB40B, member RAS oncogene family || || || || 10966 || hHC006215 || 1459629	-1.38	-1.16	-0.96	-1.16	-1.08	-1.19	0.3	0.29	0.73	0.91	-0.74	-0.87	-0.13	-0.14	-0.825	-0.8	-0.79	-1.23	-0.43	-0.53	-0.87	0.33
8886	hSQ016183	|| DDX18 || DEAD (Asp-Glu-Ala-Asp) box polypeptide 18 || || || || 8886 || hHC023399 || 1459635	0.79	1.1	0.99	0.65	1.78	1.87	1.18	0.95	0.14	0.33	0.2	0.48	0.69	0.55	-0.865	-0.83	-0.78	-0.21	-0.01	-0.11	-0.4	0.29
2192	hSQ001242	|| FBLN1 || fibulin 1 || || || || 2192 || hHC026118 || 1459649	0.48	0.55	0.17	0.35	-0.48	0.02	0.68	0.49	0.56	-0.73	1.09	-0.47	0.68	-0.09	0.515	0.72	0.24	-0.16	0.32	0.19	0.64	0.98
375757	hSQ039217	|| C9orf119 || chromosome 9 open reading frame 119 || || || || 375757 || hHC016721 || 1459650	-1.01	-1.11	-1.39	-1.45	-1.13	-0.88	0.85	0.84	0.8	0.78	0.48	-0.98	0.31	0.26	-0.545	-0.72	-1.69	-2.62	-0.8	-0.63	-0.88	-0.41
26100	hSQ014086	|| WIPI2 || WD repeat domain, phosphoinositide interacting 2 || || || || 26100 || hHC025157 || 1459654	0.05	0.12	0.15	-0.37	-0.23	-0.21	0.04	-0.2	0.11	-0.09	0.3	-0.42	0.08	-0.49	0.105	0.08	0.64	0.02	0.02	-0.04	0.57	-0.02
1717	hSQ020473	|| DHCR7 || 7-dehydrocholesterol reductase || || || || 1717 || hHC024943 || 1459667	0.3	0.07	0.72	0.32	0.62	0.34	0.28	0.33	0.5	0.35	0.39	-0.2	0.26	-0.28	0.835	1.05	0.46	-0.16	-0.42	-0.34	0.6	1.33
128869	hSQ006327	|| CDC91L1 || CDC91 cell division cycle 91-like 1 (S. cerevisiae) || || || || 128869 || hHA036615 || 1459670	0.61	0.4	0.6	1.06	0.7	1.26	0.11	-0.02	0.66	-1.61	1.18	0.56	0.15	1.02	1.795	1.86	1.86	0.89	0.15	0.86	1.13	0.43
53826	hSQ016548	|| FXYD6 || FXYD domain containing ion transport regulator 6 || || || || 53826 || hHC018374 || 1459679	2.02	2.27	1.71	1.48	1.95	2.02	2	2.03	2.54	2.32	1.92	1.16	1.85	1.06	1.725	1.6	1.67	1.33	0.67	0.45	1.23	1.94
5565	hSQ032770	|| PRKAB2 || protein kinase, AMP-activated, beta 2 non-catalytic subunit || || || || 5565 || hHC007231 || 1459681	-0.77	-0.56	-0.96	-1.32	-1.47	-1.44	-1.01	-0.71	-0.09	-0.22	-0.95	-1.02	-0.78	-0.4	0.615	0.54	1.08	1.11	0.69	0.7	0.77	0.23
23492	hSQ032580	|| CBX7 || chromobox homolog 7 || || || || 23492 || hHC009384 || 1459682	-0.91	-0.54	-0.41	-0.68	-1.06	-1.13	-1.71	-1.69	-1.88	-2.52	-2.16	-1.68	-0.93	-2.75	-0.755	-0.8	-0.98	-1.46	-0.32	-0.97	-0.56	-0.57
253832	hSQ039849	|| ZDHHC20 || zinc finger, DHHC-type containing 20 || || || || 253832 || hHC028997 || 1459687	-1.26	-1.11	-1.37	-1.87	-1.33	-1.29	-0.9	-0.9	-0.25	-0.36	-0.69	-0.46	-0.75	-0.27	0.305	-0.01	0.33	0.4	0.27	-0.24	0.03	-0.36
26233	hSQ002241	|| FBXL6 || F-box and leucine-rich repeat protein 6 || || || || 26233 || hHA037728 || 1459697	0.25	0.19	0.62	0.06	-0.55	-0.57	0.15	-0.07	-0.07	-0.29	0.31	-1.1	-0.66	-1.33	1.045	1.57	1.57	0.38	0.01	0.2	1.77	2.42
9088	hSQ020902	|| PKMYT1 || protein kinase, membrane associated tyrosine/threonine 1 || || || || 9088 || hHC026234 || 1459699	1.05	0.82	1.4	0.48	0.5	0.52	1.63	1.5	1.33	0.23	1.77	0.11	0.5	0.19	2.305	2.52	2.03	1.36	0.54	0.22	2.26	2.14
54543	hSQ012045	|| TOMM7 || translocase of outer mitochondrial membrane 7 homolog (yeast) || || || || 54543 || hHC030266 || 1459700	-0.86	-0.69	-0.06	-0.56	-0.35	-0.14	0.95	0.65	1.07	1.15	0.46	-0.35	-0.11	0.68	0.565	0.58	5.96e-10	-0.36	0.22	0.19	-0.64	0.91
3087	hSQ044517	|| HHEX || homeobox, hematopoietically expressed || || || || 3087 || hHC007884 || 1459704	-0.54	-0.43	-0.65	-0.8	-0.28	-0.11	0.48	0.48	0.64	0.76	-0.49	-0.47	0.32	0.39	0.265	0.23	0.04	-0.01	-0.14	-0.47	-0.19	0.03
10410	hSQ010372	|| IFITM3 || interferon induced transmembrane protein 3 (1-8U) || || || || 10410 || hHC031823 || 1459705	1.5	1.32	1.35	0.87	1.26	1.14	1.68	1.7	1.88	1.45	1.95	0.8	1.11	1.61	1.555	1.39	0.76	0.72	-0.07	0.53	0.94	0.8
2787	hSQ037819	|| GNG5 || guanine nucleotide binding protein (G protein), gamma 5 || || || || 2787 || hHC030274 || 1459710	-0.87	-0.96	-1.03	-1.31	-0.47	-0.52	0.28	0.11	1.15	1.14	0.2	-0.22	0.06	1.35	0.985	1.04	0.84	0.67	0.13	0.55	1.15	0.75
334	hSQ022089	|| APLP2 || amyloid beta (A4) precursor-like protein 2 || || || || 334 || hHC007890 || 1459714	1.36	1.23	0.79	0.28	0.38	0.76	1.76	2.27	0.76	0.83	0.68	0.02	0.46	-0.18	0.155	-0.21	-0.23	-0.27	-0.09	-0.38	-0.44	1.49
78988	hSQ033696	|| MRP63 || mitochondrial ribosomal protein 63 || || || || 78988 || hHC010653 || 1459719	-1.39	-1.3	-0.75	-1	-0.33	-0.21	0.26	0.1	0.12	0.18	-0.09	-0.33	-0.25	0.7	0.305	0.19	0.16	-0.39	0.09	0.12	0.15	0.82
35	hSQ019779	|| ACADS || acyl-Coenzyme A dehydrogenase, C-2 to C-3 short chain || || || || 35 || hHC025025 || 1459721	-0.27	-0.29	0.39	-0.31	-0.25	-0.45	0.58	0.44	0.03	-0.33	0.82	-0.69	-0.4	-0.08	0.505	0.52	0.03	-0.5	-0.86	-0.82	1.24	-0.26
80004	hSQ015016	|| RBM35B || RNA binding motif protein 35B || || || || 80004 || hHC010661 || 1459723	0.83	0.69	-0.26	-0.48	0.07	-0.09	0.43	0.23	-0.1	-0.21	0.6	0.24	0.69	-0.11	0.395	0.39	0.41	0.14	0.36	-0.48	0.29	-0.16
50484	hSQ030324	|| RRM2B || ribonucleotide reductase M2 B (TP53 inducible) || || || || 50484 || hHC029192 || 1459727	-1.03	-0.88	-0.73	-0.81	-0.91	-0.82	-0.17	-0.19	0.12	0.25	-0.57	-0.23	-0.29	0.2	0.675	0.35	0.64	0.49	0.34	-0.24	-0.15	0.38
5889	hSQ012807	|| RAD51C || RAD51 homolog C (S. cerevisiae) || || || || 5889 || hHA032529 || 1459728	-0.92	-0.9	-0.95	-1.03	-0.76	-1.27	0.27	0.21	0.62	0.72	-0.17	-0.28	-0.24	0.15	0.655	0.82	0.72	0.68	0.89	0.99	0.87	1
10477	hSQ026373	|| UBE2E3 || ubiquitin-conjugating enzyme E2E 3 (UBC4/5 homolog, yeast) || || || || 10477 || hHC029206 || 1459736	-0.39	-0.35	-0.3	-0.48	0.31	0.48	0.52	0.63	0.77	0.98	-0.08	-0.2	0.35	1.12	0.485	0.62	0.67	0.45	0.82	0.66	0.31	1.04
6626	hSQ044982	|| SNRPA || small nuclear ribonucleoprotein polypeptide A || || || || 6626 || hHC019367 || 1459740	1.56	1.4	1.52	0.81	0.99	1.04	1.62	1.59	1.73	1.79	2.21	0.84	1.22	1.06	1.875	1.9	1.39	1.09	0.21	0.73	1.55	2.48
51079	hSQ018172	|| NDUFA13 || NADH dehydrogenase (ubiquinone) 1 alpha subcomplex, 13 || || || || 51079 || hHC021546 || 1459742	0.98	0.84	1.02	0.42	0.5	0.38	2.64	2.93	2.23	1.97	2.22	0.67	1.01	1.7	0.815	0.8	0.21	-0.92	-0.84	-0.65	-0.02	-0.14
4247	hSQ020518	|| MGAT2 || mannosyl (alpha-1,6-)-glycoprotein beta-1,2-N-acetylglucosaminyltransferase || || || || 4247 || hHC012347 || 1459745	-0.76	-0.48	-0.34	-0.44	0.26	0.18	-0.42	-0.49	0.4	0.11	-0.35	-0.23	0.09	0.42	0.005	0.44	0.42	0.63	0.78	0.59	0.36	1.37
150472	hSQ009798	|| CBWD2 || COBW domain containing 2 || || || || 150472 || hHC031939 || 1459750	-1.37	-1.34	-1.77	-1.99	-1.25	-1.44	0.52	0.33	-0.03	-0.04	-0.7	-0.73	-0.23	-0.58	-0.485	-0.48	-0.24	-0.47	0.73	0.43	-0.6	0.75
5292	hSQ021037	|| PIM1 || pim-1 oncogene || || || || 5292 || hHC011683 || 1459765	0.19	0.4	1.44	0.79	0.42	0.7	0.14	-0.07	-0.47	-0.24	-0.22	-0.24	0.56	-0.33	0.115	0.72	0.73	0.46	0.75	0.36	0.09	2.26
10970	hSQ026263	|| CKAP4 || cytoskeleton-associated protein 4 || || || || 10970 || hHC019443 || 1459778	0.73	0.66	0.54	0.33	0.16	0.22	0.38	0.57	-0.08	0.01	-0.31	-0.4	0.33	-0.43	0.035	0.07	0.22	-0.27	0.01	0.08	0.43	0.07
127687	hSQ006180	|| C1orf122 || chromosome 1 open reading frame 122 || || || || 127687 || hHC032070 || 1459796	-0.66	-0.62	-0.03	-0.27	0.36	0.48	1.53	1.51	1.32	1.12	1.55	0.19	0.14	1.15	2.155	2.19	1.44	0.47	0.03	-0.28	1.26	-0.31
3987	hSQ029913	|| LIMS1 || LIM and senescent cell antigen-like domains 1 || || || || 3987 || hHC006803 || 1459797	-1.15	-0.85	0.34	-0.2	-0.23	-0.09	-2.38	-3.74	-1.83	-2.08	-3.14	-0.55	-1.48	-1.28	-1.515	-2.64	-3.61	-1.13	-0.62	-1.43	-1.36	-0.83
55244	hSQ017658	|| FLJ10847 || hypothetical protein FLJ10847 || || || || 55244 || hHC013430 || 1459800	-0.19	-0.33	-0.33	-0.39	-0.15	-0.41	-0.72	-0.72	-0.18	-0.09	-0.19	-0.4	-0.2	-0.72	-0.245	-0.31	-0.05	-0.16	-0.29	-0.4	-0.22	0.48
285830	hSQ004918	|| RP3-377H14.5 || hypothetical protein FLJ35429 || || || || 285830 || hHC028019 || 1459803	0.77	1.11	1.46	1.02	1.97	2.11	2.23	2.23	1.27	1.75	0.95	1.3	1.33	1.89	-0.575	-0.34	-1.22	-1.66	-0.74	-0.05	-1.68	-0.18
2274	hSQ042727	|| FHL2 || four and a half LIM domains 2 || || || || 2274 || hHC008988 || 1459807	-0.81	-0.84	-0.17	-0.19	0.11	0.19	0.01	0.05	0.46	0.4	-0.16	-0.26	0.15	0.55	1.005	1.09	1.84	1.15	1.24	1.24	1.76	1.48
6386	hSQ026580	|| SDCBP || syndecan binding protein (syntenin) || || || || 6386 || hHC025734 || 1459817	-0.8	-0.59	-0.54	-0.74	-0.34	-0.06	0.68	0.66	1.15	1.33	0.42	0.28	0.14	1	0.805	0.65	0.78	0.23	0.53	0.54	0.14	-0.06
1660	hSQ008624	|| DHX9 || DEAH (Asp-Glu-Ala-His) box polypeptide 9 || || || || 1660 || hHA033284 || 1459825	-0.24	-0.26	-1.14	-0.71	-0.32	0.13	-2.56	-3.11	-2.58	-6.03	-0.03	-0.91	-0.34	0.08	-2.365	-2.07	-2	-2.63	-1.08	-0.48	-1.09	-1.17
51307	hSQ044943	|| FAM53C || family with sequence similarity 53, member C || || || || 51307 || hHC005296 || 1459830	1.62	1.54	0.75	0.22	0.78	1.03	0.17	0.25	-0.16	-0.35	0.58	0.54	0.97	0.29	1.395	1.19	1.33	1.17	1.29	0.91	1.15	0.57
3875	hSQ027615	|| KRT18 || keratin 18 || || || || 3875 || hHC031120 || 1459832	7.15e-09	-0.2	-0.57	-0.94	-0.54	-0.61	1.38	1.37	0.52	0.44	1.07	0.15	0.39	0.17	-0.925	-0.86	-0.97	-1.65	-1.17	-1.26	-0.45	-1.39
4942	hSQ019959	|| OAT || ornithine aminotransferase (gyrate atrophy) || || || || 4942 || hHC019546 || 1459833	-0.69	-0.62	-0.42	-0.67	-0.05	-0.23	0.53	0.45	0.87	0.97	0.2	-0.01	0.28	0.74	0.345	0.53	0.36	-0.01	0.13	0.47	-0.12	0.83
60485	hSQ014285	|| SAV1 || salvador homolog 1 (Drosophila) || || || || 60485 || hHC008400 || 1459836	-0.91	-0.5	-0.28	-0.24	-0.49	-0.3	-1.71	-1.86	-1.5	-1.64	-1.94	-0.99	-0.73	-1.19	-1.575	-1.66	-1.52	-0.81	-0.21	-0.58	-1.17	-0.45
5888	hSQ041537	|| RAD51 || RAD51 homolog (RecA homolog, E. coli) (S. cerevisiae) || || || || 5888 || hHA037019 || 1459844	-0.41	-0.14	-0.28	0.09	-0.12	-0.22	-0.67	-0.37	-0.25	-0.14	-0.28	-0.52	0.34	-0.21	-0.485	-0.48	-0.31	0.08	0.26	0.64	0.53	0.1
4709	hSQ020111	|| NDUFB3 || NADH dehydrogenase (ubiquinone) 1 beta subcomplex, 3, 12kDa || || || || 4709 || hHC028180 || 1459847	-1.6	-1.51	-0.78	-0.94	-0.66	-0.66	1.13	1.1	0.91	1.14	0.2	-0.27	-0.09	0.59	-0.595	-0.52	-1.43	-1.72	-0.77	-0.69	-1.41	0.55
10367	hSQ011794	|| CBARA1 || calcium binding atopy-related autoantigen 1 || || || || 10367 || hHC018931 || 1459852	1.22	1.24	0.42	0.23	0.39	0.45	1.8	1.95	1.12	1.27	0.92	0.39	1.68	0.21	0.405	0.35	0.68	0.4	0.71	0.28	0.17	1.7
88455	hSQ014072	|| ANKRD13 || ankyrin repeat domain 13 || || || || 88455 || hHC008472 || 1459880	0.57	0.63	0.18	0.16	0.72	0.9	0.49	0.79	0.58	0.75	0.22	0.11	0.5	0.58	0.885	0.86	0.88	1.07	0.32	0.22	0.96	0.37
1798	hSQ034192	|| DPAGT1 || dolichyl-phosphate (UDP-N-acetylglucosamine) N-acetylglucosaminephosphotransferase 1 (GlcNAc-1-P transferase) || || || || 1798 || hHC020540 || 1459881	-0.08	0.01	0.61	0.48	0.63	0.75	0.08	0.13	0.33	0.44	0.31	0.34	0.34	0.3	1.105	1.23	0.95	0.35	0.22	0.21	0.81	0.23
831	hSQ034297	|| CAST || calpastatin || || || || 831 || hHA034005 || 1459882	1.49	1.65	0.25	0.22	1.01	1.25	1.34	1.42	-0.39	-0.39	0.15	0.56	0.89	0.56	-0.995	-1.17	-1.68	-1.03	-0.32	-0.98	-1.02	-1.68
4522	hSQ009781	|| MTHFD1 || methylenetetrahydrofolate dehydrogenase (NADP+ dependent) 1, methenyltetrahydrofolate cyclohydrolase, formyltetrahydrofolate synthetase || || || || 4522 || hHA033350 || 1459887	0.85	0.17	-0.05	0.29	0.06	-0.36	-3.7	-4.61	-4.92	-4.66	0.75	-0.35	0.22	-0.74	-2.615	-2.34	-1.52	-1.31	-0.99	-0.48	-0.79	-0.75
23589	hSQ023678	|| CARHSP1 || calcium regulated heat stable protein 1, 24kDa || || || || 23589 || hHC025217 || 1459896	0.53	0.41	0.66	-0.17	0.99	0.84	1.53	1.61	1.11	0.94	1.52	0.58	0.19	1.2	0.745	0.74	0.13	-0.43	-0.71	-0.15	0.7	0.38
6715	hSQ029815	|| SRD5A1 || steroid-5-alpha-reductase, alpha polypeptide 1 (3-oxo-5 alpha-steroid delta 4-dehydrogenase alpha 1) || || || || 6715 || hHC016833 || 1459906	-1.18	-1.23	-0.5	-0.56	-0.92	-1	-0.34	-0.35	0.17	0.06	-1.09	-1.13	-0.37	-0.47	0.965	1.1	0.8	-0.05	0.52	0.19	0.82	1
51599	hSQ045483	|| LSR || lipolysis stimulated lipoprotein receptor || || || || 51599 || hHC024111 || 1459915	0.5	0.17	-0.08	-0.68	-0.15	0.04	0.94	0.55	0.28	0.36	0.63	-0.73	-0.3	0.16	-0.115	0.33	-0.12	-1.25	-1.46	-1.86	0.88	-1.2
146691	hSQ031040	|| TOM1L2 || target of myb1-like 2 (chicken) || || || || 146691 || hHC012945 || 1459935	1.15	0.85	1.07	0.34	0.29	0.3	0.19	0.15	-0.51	-0.27	0.02	-0.66	0.23	-2.04	1.285	1.19	0.63	0.26	0.3	-0.23	0.82	1.93
79939	hSQ014630	|| SLC35E1 || solute carrier family 35, member E1 || || || || 79939 || hHC027389 || 1459937	-0.43	-0.42	-1.04	-1.28	-0.71	-0.7	-1.49	-1.62	-1.44	-1.95	-0.59	-1.3	-0.88	-2.09	-0.575	-0.69	-0.27	-0.14	-0.62	-0.46	-0.33	-0.96
8891	hSQ037808	|| EIF2B3 || eukaryotic translation initiation factor 2B, subunit 3 gamma, 58kDa || || || || 8891 || hHC018438 || 1459940	0.76	0.71	-0.59	0.04	0.37	0.69	0.49	0.38	0.09	-1.28	1.21	0.61	0.97	0.94	-0.305	-0.29	0.07	-0.49	0.26	0.75	-0.69	-0.82
28969	hSQ035361	|| BZW2 || basic leucine zipper and W2 domains 2 || || || || 28969 || hHC014601 || 1459957	0.58	0.66	0.08	0.09	0.29	0.39	1.61	1.44	0.99	1.16	0.83	0.53	0.92	0.54	0.135	-0.11	0.66	0.42	0.45	0.21	-0.22	1.52
2281	hSQ027038	|| FKBP1B || FK506 binding protein 1B, 12.6 kDa || || || || 2281 || hHC026323 || 1459959	-0.65	-0.83	-0.13	-0.6	-0.2	-0.06	1.3	1.29	1.22	1.3	1.14	-0.23	0.2	1.25	0.945	0.93	0.83	0.39	0.01	0.07	0.57	0.07
8976	hSQ013183	|| WASL || Wiskott-Aldrich syndrome-like || || || || 8976 || hHC005770 || 1459962	7.15e-09	0.12	-0.15	-0.52	0.28	0.5	0.13	0.14	-0.15	0.04	-0.65	2.98e-09	0.18	0.93	0.875	0.83	0.91	0.82	1.09	0.58	0.47	1.2
5500	hSQ005107	|| PPP1CB || protein phosphatase 1, catalytic subunit, beta isoform || || || || 5500 || hHC007976 || 1459963	-0.97	-0.79	-1.23	-1.37	-1	-0.88	-0.09	-0.05	0.05	0.15	-0.01	-0.03	-0.21	0.6	0.215	-0.04	0.18	0.07	0.11	-0.5	-0.27	-0.31
28964	hSQ012516	|| GIT1 || G protein-coupled receptor kinase interactor 1 || || || || 28964 || hHC026330 || 1459967	3.96	3.33	2.2	1.47	1.96	1.85	2.14	2.1	1.7	1.04	2.22	1.41	0.81	-0.03	1.605	1.31	1.51	0.77	0.38	0.08	1.64	1.62
1017	hSQ027469	|| CDK2 || cyclin-dependent kinase 2 || || || || 1017 || hHC016905 || 1459968	0.33	0.32	0.16	0.16	0.38	0.3	-0.96	-1.49	-0.35	-1.12	0.29	-0.55	0.26	-0.54	0.405	0.43	1.13	0.4	0.34	0.44	0.61	0.53
2935	hSQ007336	|| GSPT1 || G1 to S phase transition 1 || || || || 2935 || hHC027489 || 1459977	0.34	0.41	-0.43	-0.32	0.44	0.54	-0.6	-0.78	-0.11	-1.05	0.17	0.31	0.29	0.78	-1.295	-1.27	-0.54	0.21	0.39	0.53	0.14	0.65
49856	hSQ031477	|| WDR8 || WD repeat domain 8 || || || || 49856 || hHC004295 || 1459979	-1.3	-1.03	0.12	-0.77	-0.32	-0.33	-0.39	-0.75	-0.31	-0.19	-1.12	-1.14	-0.23	-0.24	0.845	0.86	1.4	0.65	0.77	0.92	1.17	0.7
5876	hSQ004032	|| RABGGTB || Rab geranylgeranyltransferase, beta subunit || || || || 5876 || hHC006468 || 1459980	-1.31	-0.96	-0.84	-1.26	-0.42	-0.44	0.34	0.35	0.37	0.65	-0.29	-0.41	-0.18	0.59	1.025	1.16	0.74	0.52	1.12	1.36	0.04	1.18
25879	hSQ012423	|| WDSOF1 || WD repeats and SOF1 domain containing || || || || 25879 || hHC029367 || 1459989	1.41	1.66	1.25	0.69	2.12	2.04	2.44	2.41	1.11	1.59	1.64	1.52	1.64	1.44	-0.735	-0.62	-1.02	-1.31	-0.56	-0.21	-1.47	0.13
22796	hSQ008254	|| COG2 || component of oligomeric golgi complex 2 || || || || 22796 || hHC018502 || 1459990	0.2	0.18	-0.74	-0.95	-0.05	-0.72	0.43	0.41	0.31	0.55	0.03	-0.1	0.64	-0.06	0.135	-0.29	0.69	0.63	0.07	0.53	0.41	0.72
84695	hSQ027262	|| LOXL3 || lysyl oxidase-like 3 || || || || 84695 || hHC023633 || 1459996	0.13	0.14	-0.06	-0.3	-0.16	0.43	0.45	0.36	0.11	0.17	0.19	-0.46	-0.08	-0.47	1.265	1.11	1.31	0.84	0.68	-2.68e-09	1.02	0.59
5605	hSQ014037	|| MAP2K2 || mitogen-activated protein kinase kinase 2 || || || || 5605 || hHC029380 || 1459999	0.32	0.02	0.02	-0.32	-0.56	-0.23	0.66	0.21	-0.22	-3.87	0.98	-1	-0.19	-0.19	0.105	0.83	0.62	-0.43	-0.81	-0.64	1.13	0.5
10363	hSQ009951	|| HMG20A || high-mobility group 20A || || || || 10363 || hHC007373 || 1460003	0.41	0.59	0.77	0.57	1.08	1.28	0.26	0.49	0.4	0.75	0.06	0.59	0.61	0.6	0.055	-0.11	-0.55	0.04	-0.12	0.12	-0.01	0.53
7342	hSQ015713	|| UBP1 || upstream binding protein 1 (LBP-1a) || || || || 7342 || hHC009578 || 1460005	0.69	0.79	0.31	0.17	0.77	0.67	0.4	0.62	0.24	0.88	-0.46	0.3	0.47	0.34	0.155	-0.2	-0.07	0.07	0.18	0.04	0.06	0.93
79590	hSQ010554	|| MRPL24 || mitochondrial ribosomal protein L24 || || || || 79590 || hHC021604 || 1460006	0.11	-0.03	-0.36	-0.77	-0.82	-0.54	0.71	0.32	0.58	0.29	1.22	-0.39	0.55	0.87	-0.085	-0.1	-0.59	-1.19	-0.15	-0.01	-0.06	0.74
9321	hSQ008275	|| TRIP11 || thyroid hormone receptor interactor 11 || || || || 9321 || hHC023639 || 1460007	0.93	1.22	0.01	-0.02	0.14	0.44	-0.24	-0.12	-0.51	-0.64	-0.97	-0.25	-0.15	-1.05	0.865	0.45	0.18	0.49	0.96	0.24	0.57	-0.64
10766	hSQ013427	|| TOB2 || transducer of ERBB2, 2 || || || || 10766 || hHC030516 || 1460011	0.26	0.38	0.15	0.06	0.76	0.84	0.02	-0.09	0.19	0.42	-0.47	-0.18	0.63	-0.19	0.425	0.47	0.38	0.56	1.2	0.75	0.25	2.11
78998	hSQ011277	|| C8orf51 || chromosome 8 open reading frame 51 || || || || 78998 || hHC014118 || 1460042	0.53	0.45	0.59	0.71	0.33	0.54	0.63	0.39	0.97	1.03	0.29	0.08	0.75	-0.18	1.435	1.19	1.1	0.56	0.59	0.3	0.92	1.37
2131	hSQ030347	|| EXT1 || exostoses (multiple) 1 || || || || 2131 || hHC007443 || 1460047	-0.98	-1.02	-0.85	-1.17	-0.7	-0.4	-0.41	-0.47	-0.77	-0.59	-1.01	-1.3	0.06	-1.23	-1.265	-1.17	-1.3	-1.35	-0.38	-0.49	-0.92	0.79
1173	hSQ044230	|| AP2M1 || adaptor-related protein complex 2, mu 1 subunit || || || || 1173 || hHC017997 || 1460065	0.95	0.73	0.66	-0.12	0.15	0.04	1.31	1.3	0.79	0.37	1.1	0.01	0.5	0.66	0.485	0.53	0.3	0.34	0.27	0.62	0.99	1.41
9770	hSQ025344	|| RASSF2 || Ras association (RalGDS/AF-6) domain family 2 || || || || 9770 || hHC003792 || 1460070	0.09	0.24	-0.34	-0.47	0.24	0.3	-0.46	-0.32	-0.62	-0.44	-0.48	-0.61	0.12	-0.97	-0.105	-0.29	-0.38	0.02	0.15	-0.36	-0.38	-0.27
130557	hSQ010218	|| ZNF513 || zinc finger protein 513 || || || || 130557 || hHC018004 || 1460072	-0.05	-0.09	-0.15	-0.4	-0.38	-0.64	-0.27	-0.15	-0.67	-1.06	-0.49	-0.87	-0.21	-0.29	0.865	0.75	0.69	0.12	0.57	-0.28	1.22	1.12
196513	hSQ013140	|| DCP1B || DCP1 decapping enzyme homolog B (S. cerevisiae) || || || || 196513 || hHC023162 || 1460076	1.77	1.46	0.68	0.41	0.99	1	1.37	1.36	1.15	1.23	1.3	0.54	1.13	0.49	1.235	1.15	2.12	1.9	1.18	1.24	1.74	1.82
83641	hSQ008675	|| FAM107B || family with sequence similarity 107, member B || || || || 83641 || hHC029691 || 1460090	-0.29	-0.14	0.1	0.03	0.43	0.36	0.41	0.3	0.03	0.48	-1.51	0.19	0.06	-0.18	-0.965	-1.73	-1.56	-0.77	-0.23	-0.74	-1.54	-0.26
4300	hSQ031795	|| MLLT3 || myeloid/lymphoid or mixed-lineage leukemia (trithorax homolog, Drosophila); translocated to, 3 || || || || 4300 || hHC007562 || 1460093	0.49	0.56	-0.4	0.07	0.58	0.65	-0.18	-0.02	-0.21	-0.12	-0.57	0.57	-1.34e-09	0.07	-1.545	-1.79	-1.62	-0.26	-0.67	-0.1	-0.72	-0.27
29982	hSQ024341	|| NRBF2 || nuclear receptor binding factor 2 || || || || 29982 || hHC029705 || 1460098	-0.28	-0.06	-0.26	-0.49	-0.02	0.12	0.78	0.75	0.49	0.58	-0.44	0.07	0.3	0.44	0.335	0.34	0.32	0.44	1.05	0.95	0.29	0.68
8315	hSQ007344	|| BRAP || BRCA1 associated protein || || || || 8315 || hHC019604 || 1460103	-0.09	-0.29	-0.84	-1.11	-0.84	-0.74	1.19	1.11	-0.31	-0.11	-0.27	-0.71	0.57	-1.42	-0.625	-0.56	-1.04	-1.09	0.01	-0.13	-0.95	0.15
5435	hSQ017330	|| POLR2F || polymerase (RNA) II (DNA directed) polypeptide F || || || || 5435 || hHC024679 || 1460106	0.81	0.87	0.91	0.36	0.93	0.78	2.78	2.87	1.97	2.06	1.97	0.61	1.62	1.74	0.655	0.66	-0.25	-0.4	0.04	-0.11	-0.05	0.66
219844	hSQ027909	|| HYLS1 || hydrolethalus syndrome 1 || || || || 219844 || hHC003854 || 1460110	0.07	0.02	-0.06	-0.55	0.3	0.21	1.61	1.58	1.35	1.03	0.89	0.56	0.85	0.73	0.755	0.4	0.9	0.78	0.95	0.58	0.46	0.41
22908	hSQ032364	|| SACM1L || SAC1 suppressor of actin mutations 1-like (yeast) || || || || 22908 || hHC001703 || 1460115	-1.1	-0.93	-0.69	-1.33	-0.52	-0.75	-0.18	-0.33	0.06	0.24	-0.66	-0.41	-0.25	0.26	0.165	-0.09	0.21	0.27	0.49	0.13	0.12	-0.26
22916	hSQ042563	|| NCBP2 || nuclear cap binding protein subunit 2, 20kDa || || || || 22916 || hHC003863 || 1460117	-1.79	-1.55	-0.81	-1.7	-1.29	-1.21	-1.13	-1.01	-0.9	-0.34	-2.12	-1.2	-0.18	-1.59	-1.065	-1.37	-1.81	-1.73	-0.31	-0.76	-1.74	-0.45
84926	hSQ038135	|| SPRYD3 || SPRY domain containing 3 || || || || 84926 || hHC006955 || 1460131	0.71	0.76	0.36	-0.25	1.1	0.88	-0.45	-0.14	-0.77	-0.66	-0.11	-0.47	0.6	-0.27	0.095	0.16	0.21	0.53	0.55	0.17	0.27	0.81
25829	hSQ037418	|| C22orf5 || chromosome 22 open reading frame 5 || || || || 25829 || hHC011924 || 1460135	0.63	0.59	0.99	0.32	0.5	0.66	1.02	0.35	0.55	0.67	-0.08	-0.36	0.39	-0.58	0.885	0.97	0.53	-0.02	0.39	-0.3	-0.18	1.67
8912	hSQ031039	|| CACNA1H || calcium channel, voltage-dependent, alpha 1H subunit || || || || 8912 || hHC005422 || 1460143	-0.21	-0.19	-0.9	-1.35	-0.64	-0.73	-0.5	-0.62	-1.86	-2.08	-1.03	-1.8	-0.91	-2.1	0.245	0.07	0.28	-0.88	-0.48	-1.89	0.41	-1.85
5985	hSQ027397	|| RFC5 || replication factor C (activator 1) 5, 36.5kDa || || || || 5985 || hHC007627 || 1460145	-0.03	-0.03	-0.38	-0.78	0.14	0.07	1.11	1.41	0.72	0.73	0.3	0.45	0.68	0.52	0.965	1.07	1.39	0.92	0.58	0.56	0.71	0.9
8061	hSQ043559	|| FOSL1 || FOS-like antigen 1 || || || || 8061 || hHC029825 || 1460150	3.15	3.28	2.76	1.86	2.87	2.72	3.3	3.49	2.52	2.96	2.85	2.35	3	1.75	2.555	2.31	1.74	1.92	1.55	0.96	1.91	2.54
92667	hSQ000831	|| C20orf72 || chromosome 20 open reading frame 72 || || || || 92667 || hHC005430 || 1460152	-1.92	-1.89	-2.14	-2.34	-1.72	-2.06	-0.76	-0.89	-0.64	-0.53	-1.5	-1.57	-0.49	-1.52	-0.485	-0.77	-0.78	-0.84	0.54	0.52	-0.84	1.81
23126	hSQ026466	|| POGZ || pogo transposable element with ZNF domain || || || || 23126 || hHC019677 || 1460156	1.02	1.08	0.67	0.49	0.92	0.91	0.39	0.36	-0.5	-0.55	-0.49	-0.04	0.28	-0.19	1.135	1.07	0.99	0.87	0.85	0.62	1.53	1.24
8193	hSQ019919	|| DPF1 || D4, zinc and double PHD fingers family 1 || || || || 8193 || hHC022701 || 1460170	1.41	1.09	0.9	0.55	0.97	0.36	0.73	0.4	0.09	-0.87	0.67	-0.14	-0.39	-0.51	0.645	0.65	0.79	0.46	-0.02	-0.95	0.87	1.2
90293	hSQ031275	|| KLHL13 || kelch-like 13 (Drosophila) || || || || 90293 || hHC001800 || 1460171	-0.11	0.05	0.05	-0.28	0.47	0.52	-0.52	-0.48	-0.12	-0.1	-0.83	2.98e-09	-0.16	0.28	-0.515	-0.47	-0.61	0.17	0.05	-0.2	-0.55	-0.16
25906	hSQ039082	|| C11orf51 || chromosome 11 open reading frame 51 || || || || 25906 || hHC028494 || 1460175	0.93	0.89	0.94	0.49	0.91	0.86	2.1	2.25	1.05	1.31	0.95	0.55	1.27	0.69	-0.665	-0.85	-1.78	-1.6	-1.16	-0.46	-0.85	0.92
55206	hSQ028787	|| SBNO1 || sno, strawberry notch homolog 1 (Drosophila) || || || || 55206 || hHC011312 || 1460183	0.41	0.47	0.06	0.13	0.77	0.78	-0.61	-0.33	-0.11	-0.46	-0.39	0.47	0.15	0.8	0.845	0.64	1.43	0.85	0.42	0.27	1.3	1.69
27335	hSQ001731	|| EIF3S12 || eukaryotic translation initiation factor 3, subunit 12 || || || || 27335 || hHC028505 || 1460184	0.14	0.14	-0.14	-0.47	0.35	0.01	1.34	1.44	1.58	1.83	0.92	1.12	0.66	1.16	0.685	0.68	0.66	0.34	0.33	1.18	0.77	1.46
80303	hSQ029865	|| EFHD1 || EF-hand domain family, member D1 || || || || 80303 || hHC009224 || 1460189	1.57	1.61	1.21	1.07	1.49	1.72	2.68	2.56	1.74	1.73	1.86	0.76	1.58	1.23	1.465	1.44	1.31	0.55	-0.14	-0.77	0.96	0.39
3612	hSQ005557	|| IMPA1 || inositol(myo)-1(or 4)-monophosphatase 1 || || || || 3612 || hHC010167 || 1460193	-1.21	-1.29	-1.19	-0.91	-0.76	-0.74	0.12	0.28	0.5	0.74	-0.21	0.09	-0.67	-0.01	0.125	0.08	0.49	0.24	0.34	0.28	0.27	0.72
2000	hSQ026930	|| ELF4 || E74-like factor 4 (ets domain transcription factor) || || || || 2000 || hHC024174 || 1460195	1.3	1.15	0.96	0.72	1.05	1.01	0.36	0.05	-0.19	-0.04	0.1	-0.09	0.46	-0.37	0.375	0.18	-0.07	0.08	0.2	0.06	0.97	1.15
51626	hSQ012392	|| DYNC2LI1 || dynein, cytoplasmic 2, light intermediate chain 1 || || || || 51626 || hHC012045 || 1460203	0.43	0.54	0.33	-0.06	0.25	0.27	1.8	1.66	1.47	1.55	1.47	1.08	1.15	1.52	0.155	0.26	0.56	0.5	1.11	0.96	0.11	0.97
54148	hSQ019315	|| MRPL39 || mitochondrial ribosomal protein L39 || || || || 54148 || hHC015310 || 1460206	-0.84	-0.8	-1.29	-1.37	-0.56	-0.83	0.28	0.04	0.36	-0.11	0.33	-0.03	-0.08	0.52	-0.075	0.43	1.11	0.58	1.07	1.35	0.19	1.56
26002	hSQ002453	|| MOXD1 || monooxygenase, DBH-like 1 || || || || 26002 || hHC008607 || 1460212	-0.29	-0.3	-0.27	-0.12	7.15e-09	-0.1	-0.58	-0.49	0.22	0.15	-0.07	0.28	-0.14	0.06	-0.075	-0.14	0.29	0.24	0.05	0.38	0.05	1.12
27034	hSQ014078	|| ACAD8 || acyl-Coenzyme A dehydrogenase family, member 8 || || || || 27034 || hHC008615 || 1460221	-0.59	-0.68	0.03	-0.26	-0.37	-0.66	-0.16	-0.22	-0.37	-8.94e-10	-1.19	-1.25	-0.31	-0.73	-0.035	-0.15	-0.06	-0.57	-0.2	-0.33	0.46	0.24
7775	hSQ031601	|| ZNF232 || zinc finger protein 232 || || || || 7775 || hHC011370 || 1460226	-0.3	-0.22	-0.76	-1.04	-0.72	-1.02	1.18	1.19	0.57	0.58	0.38	-0.69	0.46	-0.1	-0.865	-0.8	-1.17	-1.09	0.28	-0.07	-0.57	0.63
57805	hSQ017684	|| KIAA1967 || KIAA1967 || || || || 57805 || hHC013769 || 1460228	0.64	0.51	0.81	0.44	0.43	0.42	0.42	0.42	0.04	0.08	0.45	-0.42	0.44	-0.39	0.915	0.69	0.04	-0.09	-0.15	-0.72	0.56	1.02
84272	hSQ025617	|| YIPF4 || Yip1 domain family, member 4 || || || || 84272 || hHC002774 || 1460230	-1.58	-1.22	-0.54	-0.85	-0.47	-0.27	-1.08	-0.46	-0.28	0.42	-0.93	-0.03	-0.86	0.54	-0.065	-0.26	-0.34	0.44	0.66	0.8	-0.6	1.13
5983	hSQ009317	|| RFC3 || replication factor C (activator 1) 3, 38kDa || || || || 5983 || hHC013775 || 1460236	0.38	0.38	-0.27	-0.02	0.68	0.35	-0.95	-0.97	-0.7	-0.57	0.79	0.79	0.89	1.03	0.235	0.38	1.32	1.57	1.05	1.65	1.07	-0.16
54961	hSQ025738	|| SSH3 || slingshot homolog 3 (Drosophila) || || || || 54961 || hHC022239 || 1460245	1.48	1.42	0.84	0.8	0.84	0.46	1.24	1.22	0.14	0.06	0.57	0.13	0.28	-0.38	0.405	0.66	0.4	-0.02	-0.36	-0.81	1.09	0.25
23039	hSQ020556	|| XPO7 || exportin 7 || || || || 23039 || hHC016977 || 1460248	-0.33	-0.35	-0.55	-0.48	0.13	-0.09	-1.48	-2.66	-2.59	-3.02	-0.7	-0.55	-0.29	-1.27	-1.805	-1.35	-1.46	-1.5	-0.78	-0.56	-0.59	-0.62
54915	hSQ021913	|| YTHDF1 || YTH domain family, member 1 || || || || 54915 || hHC013121 || 1460257	0.33	0.4	-0.1	-0.28	0.4	0.37	0.14	0.48	0.07	0.1	-0.05	-0.07	0.79	0.01	1.245	1.01	1.18	1.27	1.33	1.03	1.45	2.38
81691	hSQ025885	|| LOC81691 || exonuclease NEF-sp || || || || 81691 || hHC006532 || 1460270	0.14	0.22	0.27	-0.34	-0.29	-0.39	-0.33	-0.22	-0.28	-0.48	0.06	-0.27	0.29	-0.8	0.835	0.57	1.11	0.57	1.14	1.02	0.53	1.11
3257	hSQ014883	|| HPS1 || Hermansky-Pudlak syndrome 1 || || || || 3257 || hHA034179 || 1460276	-0.99	-0.91	-0.76	-1.08	-0.58	-0.39	0.17	-0.08	-0.11	-0.08	-0.1	-0.64	-0.38	0.08	0.175	0.25	1.29	0.33	0.28	0.07	1.1	-0.29
83541	hSQ039028	|| C20orf55 || chromosome 20 open reading frame 55 || || || || 83541 || hHC014755 || 1460281	3.38	2.93	1.69	1.27	2.06	1.56	1.21	1.29	1.26	1.04	1.44	1.05	0.89	0.68	1.825	1.69	1.44	1.37	0.63	0.68	1.71	2.08
1528	hSQ035067	|| CYB5A || cytochrome b5 type A (microsomal) || || || || 1528 || hHC022313 || 1460301	-0.05	-0.01	0.44	-0.16	0.19	0.14	2.27	2.09	1.99	2.01	1.08	0.59	0.78	1.11	1.075	0.75	0.35	0.33	0.56	0.41	0.3	1.58
79133	hSQ036307	|| C20orf7 || chromosome 20 open reading frame 7 || || || || 79133 || hHA036826 || 1460302	-0.54	-0.53	-0.34	-0.51	-0.07	-0.12	1.45	1.48	1	1.24	1	0.4	0.67	0.66	0.785	0.96	1.42	0.58	1.35	1.5	0.94	1.29
81932	hSQ044203	|| HDHD3 || haloacid dehalogenase-like hydrolase domain containing 3 || || || || 81932 || hHC018660 || 1460315	0.03	-0.13	0.96	0.29	0.14	0.05	0.43	0.39	1.03	0.7	1.13	-0.48	-0.01	0.37	1.255	1.41	1.17	0.51	0.21	0.14	1.67	1.91
1749	hSQ035274	|| DLX5 || distal-less homeobox 5 || || || || 1749 || hHC026679 || 1460339	-0.05	-0.26	-0.18	-0.15	-0.29	0.03	0.78	0.6	0.02	0.25	0.14	-0.62	0.48	-0.44	-0.605	-0.4	-0.52	-1.24	-0.51	0.34	-0.64	0.33
6120	hSQ034584	|| RPE || ribulose-5-phosphate-3-epimerase || || || || 6120 || hHC030787 || 1460340	-0.57	-0.61	-1.42	-0.98	-1.02	-1.32	-1.58	-1.35	-0.6	-0.81	-0.69	-0.34	-0.69	-0.48	-0.705	-0.63	0.27	0.11	0.75	0.68	0.11	0.63
54884	hSQ033040	|| RetSat || all-trans-13,14-dihydroretinol saturase || || || || 54884 || hHC006018 || 1460342	-2.52	-2.59	-2.22	-2.5	-2.69	-2.42	-2.39	-1.71	-2.27	-2.4	-2.72	-2.96	-1.62	-2.31	-2.895	-2.65	-3.81	-4.34	-1.74	-1.84	-2.14	-2.47
219404	hSQ027628	|| MGC9850 || hypothetical protein MGC9850 || || || || 219404 || hHC008191 || 1460344	1.77	1.7	0.63	0.57	1.05	1.07	1.05	1.44	1.26	1.19	0.48	0.89	0.93	0.2	0.135	0.24	0.43	0.55	0.65	0.74	0.11	1.6
1876	hSQ004488	|| E2F6 || E2F transcription factor 6 || || || || 1876 || hHC030797 || 1460350	-0.42	-0.24	-0.14	-0.32	0.39	0.37	-0.45	-0.45	-0.28	-0.1	-0.58	-0.28	-0.12	0.57	0.385	0.19	0.25	0.5	0.85	1.08	1.24	0.98
54505	hSQ013792	|| DHX29 || DEAH (Asp-Glu-Ala-His) box polypeptide 29 || || || || 54505 || hHC010966 || 1460366	0.29	0.54	-0.59	-1.05	0.05	0.33	-0.33	-0.08	-0.36	-0.3	-0.78	0.38	0.41	0.48	-0.225	-0.43	-0.54	-0.27	0.49	-0.09	-0.79	-1.21
255758	hSQ040644	|| MGC33212 || hypothetical protein MGC33212 || || || || 255758 || hHC014256 || 1460369	-1.45	-1.15	0.12	-0.75	-0.46	-0.68	0.68	0.37	0.52	0.93	-0.17	-0.29	-0.04	0.43	-0.145	-0.21	-0.21	-0.09	0.43	0.39	-0.37	0.52
65264	hSQ017370	|| UBE2Z || ubiquitin-conjugating enzyme E2Z (putative) || || || || 65264 || hHC016527 || 1460370	0.51	0.37	0.24	-0.21	-0.15	0.29	0.91	0.58	0.44	0.41	0.16	-0.6	0.44	-0.02	0.695	0.18	0.92	0.84	0.57	0.38	1.32	1.18
25987	hSQ017587	|| LRRC54 || leucine rich repeat containing 54 || || || || 25987 || hHC012640 || 1460389	1.57	1.13	1.77	1.23	1.72	1.9	1.63	1.73	1.58	1.85	1.27	0.58	0.91	0.02	2.335	2.46	2.06	1.4	0.77	1.02	1.63	3
51181	hSQ020711	|| DCXR || dicarbonyl/L-xylulose reductase || || || || 51181 || hHC024753 || 1460390	-0.03	-0.25	0.58	0.1	0.65	0.53	0.78	0.79	0.73	-0.99	1.2	-0.14	-0.16	0.82	1.165	1.45	0.75	0.18	-0.48	0.37	1.37	1.52
51426	hSQ043083	|| POLK || polymerase (DNA directed) kappa || || || || 51426 || hHC003959 || 1460398	-0.9	-0.86	-1.27	-1.26	-1.09	-0.85	-1.38	-1.07	-1.14	-1.29	-1.53	-0.45	-1.17	-1.1	-0.785	-1.18	-1.06	-0.41	-0.14	-0.32	-0.52	-1.17
23421	hSQ000166	|| ITGB3BP || integrin beta 3 binding protein (beta3-endonexin) || || || || 23421 || hHA035416 || 1460404	-1.22	-0.92	-1.23	-1.25	-0.2	-0.07	-0.03	-0.22	-0.42	0.36	-0.73	0.1	-0.34	1.43	-2.215	-1.48	-1.66	-1.37	0.11	0.4	-1.87	0.24
92399	hSQ028578	|| MRRF || mitochondrial ribosome recycling factor || || || || 92399 || hHC029925 || 1460417	0.04	0.05	-0.05	-0.07	0.46	0.17	1.36	1.39	1.23	0.83	1.02	0.43	0.62	0.62	1.105	1.2	1.14	0.84	0.66	0.79	0.74	1.23
9859	hSQ034506	|| CEP170 || centrosomal protein 170kDa || || || || 9859 || hHC029930 || 1460426	-0.12	0.15	-0.42	-0.54	0.27	0.57	-1	-1.2	-0.89	-0.45	-1.76	-0.35	-0.87	-0.06	-0.875	-0.49	-2.06	-0.15	0.12	-0.18	-1.16	0.71
7405	hSQ029760	|| UVRAG || UV radiation resistance associated gene || || || || 7405 || hHC004026 || 1460444	-0.49	-0.41	-0.28	-0.47	0.06	-0.09	-0.84	-1.08	-1.23	-0.76	-0.34	-0.16	0.3	-0.6	-0.515	-0.3	-0.07	0.32	0.7	0.52	0.12	1.19
257160	hSQ008178	|| DKFZp547C195 || hypothetical protein DKFZp547C195 || || || || 257160 || hHC007098 || 1460460	1.76	2.14	1.45	1.3	2.6	2.25	0.65	0.73	0.13	0.83	-0.12	0.98	1.67	0.88	-0.745	-0.99	-1.67	-1.14	0.19	0.25	-1.12	1.13
79828	hSQ003231	|| FLJ13984 || hypothetical protein FLJ13984 || || || || 79828 || hHC012117 || 1460464	-1.25	-1.02	-0.7	-0.74	-1.03	-0.73	-2.34	-2.17	-2.19	-2.31	-1.92	-1.38	-1.11	-2.18	-2.135	-2.28	-2.21	-1.05	-1.61	-2.01	-1.39	-2.04
113130	hSQ025140	|| CDCA5 || cell division cycle associated 5 || || || || 113130 || hHC007762 || 1460474	-0.61	-0.41	0.01	-0.37	-0.25	-0.27	-0.47	-0.24	-0.22	-0.2	-0.73	-0.51	0.26	-0.17	0.205	0.54	-0.07	-0.06	0.34	0.5	0.59	1.24
157	hSQ008807	|| ADRBK2 || adrenergic, beta, receptor kinase 2 || || || || 157 || hHC031659 || 1460475	-1.35	-1.79	-0.98	-0.89	-1.51	-1.56	-1.39	-1.13	-0.96	-1.23	-1.18	-1.95	-0.71	-2.03	-1.815	-1.89	-2.37	-2.7	-0.63	-0.03	-1.13	-0.47
284361	hSQ029580	|| LOC284361 || hypothetical protein LOC284361 || || || || 284361 || hHC005576 || 1460483	0.45	0.49	0.14	-0.06	0.79	0.68	1.6	1.48	1.2	1.09	1.35	0.33	0.65	1.03	1.315	1.45	1.23	0.55	0.34	-0.03	0.95	0.44
51399	hSQ037863	|| TRAPPC4 || trafficking protein particle complex 4 || || || || 51399 || hHA038764 || 1460497	0.1	0.19	-0.45	-0.32	0.36	0.22	0.9	0.98	1.31	1.37	0.91	0.86	0.26	1.56	1.295	1.25	0.83	0.82	0.08	1.08	1.41	-0.38
9765	hSQ027226	|| ZFYVE16 || zinc finger, FYVE domain containing 16 || || || || 9765 || hHC011434 || 1460500	-0.58	-0.35	-1.06	-1.22	-1.04	-1.07	-0.46	-0.63	0.05	0.23	-0.57	-0.42	-0.5	0.1	1.435	1.12	0.52	0.84	1.11	0.41	0.51	0.03
51754	hSQ000532	|| C9orf127 || chromosome 9 open reading frame 127 || || || || 51754 || hHC007205 || 1460507	4.94	4.96	4.11	3.63	4.62	4.89	4.15	3.86	3.54	3.63	4.15	3.99	3.98	4.2	1.685	1.66	1.78	1.46	0.44	-0.01	0.7	0.63
84678	hSQ021907	|| FBXL10 || F-box and leucine-rich repeat protein 10 || || || || 84678 || hHC010330 || 1460513	0.54	0.79	0.83	0.32	0.99	1.14	0.1	0.35	-0.05	0.02	-0.4	0.04	0.47	0.6	-0.355	-0.28	-0.33	-0.07	-0.15	-0.33	0.05	0.28
440	hSQ045011	|| ASNS || asparagine synthetase || || || || 440 || hHC028927 || 1460515	1.16	1.26	0.65	0.68	0.24	0.03	1.94	2.04	1.63	1.46	1.91	0.84	1.58	0.26	1.345	1.22	0.95	0.48	1.37	0.86	0.69	0.81
84947	hSQ032206	|| SERAC1 || serine active site containing 1 || || || || 84947 || hHC010336 || 1460522	-0.69	-0.53	-0.67	-0.54	-0.06	-0.3	-0.3	-0.13	-0.22	-0.02	-0.42	-0.02	-0.02	-8.94e-10	-0.165	-0.36	-0.28	-0.04	-0.02	-0.35	-0.29	-0.25
8065	hSQ037391	|| CUL5 || cullin 5 || || || || 8065 || hHC013188 || 1460529	-0.36	-0.06	0.05	-0.37	-0.2	-0.11	-2	-1.94	-0.79	-1.18	-0.8	-0.33	-0.6	-0.36	0.325	0.3	-0.03	0.13	0.36	-0.14	-0.16	0.22
5827	hSQ024880	|| PXMP2 || peroxisomal membrane protein 2, 22kDa || || || || 5827 || hHC020863 || 1460545	-0.99	-0.98	-0.79	-1.03	-0.66	-0.31	0.89	0.62	0.48	0.49	0.35	-0.39	0.02	0.92	1.215	1.4	1.17	0.62	1.09	0.84	0.7	1.31
64324	hSQ033142	|| NSD1 || nuclear receptor binding SET domain protein 1 || || || || 64324 || hHC017145 || 1460562	1.05	1.12	0.23	-0.21	0.3	0.17	-0.34	-0.06	-0.55	-0.69	-0.82	-0.56	0.09	-1.02	0.055	0.12	-0.64	-0.28	0.02	-0.43	0.13	0.37
1376	hSQ019618	|| CPT2 || carnitine palmitoyltransferase II || || || || 1376 || hHC010401 || 1460570	-0.49	-0.4	-0.34	-0.62	-0.46	-0.71	-0.38	-0.56	-0.59	-0.81	-0.76	-0.71	0.14	-0.49	0.215	0.68	0.11	0.52	0.14	0.37	0.61	0.32
23432	hSQ008960	|| GPR161 || G protein-coupled receptor 161 || || || || 23432 || hHA038415 || 1460573	-0.58	-0.6	-0.71	-0.67	-1.12	-1.49	-0.92	-1.16	-0.76	-1.68	0.08	-1.19	-0.76	-1.4	-1.045	-0.91	-0.59	-1.3	-1.32	-1.44	-0.24	-1.08
113419	hSQ012849	|| TEX261 || testis expressed sequence 261 || || || || 113419 || hHC020933 || 1460590	0.33	0.06	-0.19	-0.44	0.27	0.02	-0.2	0.1	0.59	0.56	0.61	0.07	0.23	-0.42	1.125	0.92	1.28	0.82	0.05	-0.01	0.82	1.3
8568	hSQ039140	|| D21S2056E || DNA segment on chromosome 21 (unique) 2056 expressed sequence || || || || 8568 || hHC025604 || 1460593	-0.88	-0.91	-0.86	-1.61	-1.16	-0.71	-0.33	-0.4	-1.38	-1.65	-0.37	-2.48	0.63	-1.89	-0.605	-0.89	-1.55	-3.22	-0.86	-2.49	-1.05	-2.13
4733	hSQ038369	|| DRG1 || developmentally regulated GTP binding protein 1 || || || || 4733 || hHC030919 || 1460599	-0.05	-0.02	-0.29	-0.51	0.1	-0.16	1.06	1.24	1.05	0.88	1.45	0.84	0.78	1.19	1.105	0.91	1.05	1.1	1.07	1.23	0.95	1.66
121441	hSQ033667	|| NEDD1 || neural precursor cell expressed, developmentally down-regulated 1 || || || || 121441 || hHC003012 || 1460606	-1.09	-0.91	-0.34	-0.25	-0.62	-0.52	-0.92	-0.77	0.07	-0.03	-0.99	-0.5	-0.64	-0.17	0.045	-0.1	-0.22	-6.71e-10	0.23	-2.68e-09	-0.3	0.32
3712	hSQ026278	|| IVD || isovaleryl Coenzyme A dehydrogenase || || || || 3712 || hHC021005 || 1460627	-0.26	-0.29	-0.22	-0.3	-0.22	-0.71	-0.53	-0.57	-0.6	-0.35	-0.28	-0.71	-0.49	-0.78	-0.855	-0.84	-0.96	-0.92	-0.79	-0.83	-0.32	0.11
51013	hSQ025756	|| EXOSC1 || exosome component 1 || || || || 51013 || hHC018839 || 1460636	1.17	1.08	0.1	0.08	0.73	0.75	1.49	1.48	1.9	1.55	1.81	1.05	0.68	1.88	2.135	1.91	1.77	1.58	0.92	1.51	1.7	0.91
55818	hSQ009061	|| JMJD1A || jumonji domain containing 1A || || || || 55818 || hHC009894 || 1460642	0.35	0.53	-0.15	-0.59	0.1	0.31	-0.22	0.01	-0.24	-0.16	-0.36	-0.08	-0.08	0.24	0.345	0.21	0.58	0.33	0.78	0.42	0.07	-0.91
5524	hSQ032605	|| PPP2R4 || protein phosphatase 2A, regulatory subunit B' (PR 53) || || || || 5524 || hHC021904 || 1460643	0.71	0.57	1.3	0.41	0.16	0.2	0.99	0.9	1.2	0.9	1.3	-0.12	0.43	-0.23	1.885	1.39	1.05	0.59	0.09	-0.2	1.31	1.4
51337	hSQ040069	|| C8orf55 || chromosome 8 open reading frame 55 || || || || 51337 || hHC023931 || 1460644	0.3	0.22	0.55	0.24	0.38	0.21	0.46	0.36	0.51	0.46	0.83	-0.03	0.2	-0.23	1.445	1.41	1.37	0.23	-0.09	-0.68	1.61	1.18
6890	hSQ028045	|| TAP1 || transporter 1, ATP-binding cassette, sub-family B (MDR/TAP) || || || || 6890 || hHC015030 || 1460649	-0.21	-0.22	-0.29	-0.62	-0.12	-0.38	0.02	-0.13	-0.1	-0.36	-0.4	-0.49	0.15	-0.39	0.225	0.4	-0.29	-0.24	0.1	0.04	0.2	0.71
5609	hSQ018130	|| MAP2K7 || mitogen-activated protein kinase kinase 7 || || || || 5609 || hHC020439 || 1460654	0.88	0.7	0.79	0.38	0.05	0.08	-0.35	-0.21	-0.24	-0.54	0.32	-0.83	-0.39	-1.2	0.845	0.82	0.54	-0.67	-0.01	-0.59	1.04	0.57
5118	hSQ027225	|| PCOLCE || procollagen C-endopeptidase enhancer || || || || 5118 || hHC022528 || 1460656	1.28	1.05	0.71	0.32	0.93	0.75	1.9	1.99	1.63	1.79	1.21	0.67	0.48	-8.94e-10	1.095	1.1	0.84	-0.1	-0.18	-0.17	0.98	1.5
55004	hSQ002138	|| FLJ20625 || hypothetical protein FLJ20625 || || || || 55004 || hHC022534 || 1460664	7.15e-09	-0.28	-0.17	0.11	0.35	0.37	0.36	-0.16	0.7	-2.98	1.21	-0.35	0.08	0.9	1.785	1.51	1.76	0.93	0.03	1.12	1.58	1.53
51143	hSQ014756	|| DYNC1LI1 || dynein, cytoplasmic 1, light intermediate chain 1 || || || || 51143 || hHC002520 || 1460670	-1.63	-1.46	-1.39	-1.8	-1.44	-1.37	-1.54	-1.32	-0.91	-0.73	-1.99	-1	-0.52	-0.7	-0.495	-0.46	-0.03	0.27	0.64	0.17	-0.54	0.45
51202	hSQ002936	|| DDX47 || DEAD (Asp-Glu-Ala-Asp) box polypeptide 47 || || || || 51202 || hHA035052 || 1460686	1.61	1.56	0.13	0.52	1.17	1.23	0.06	-0.21	-0.66	-3.05	1.93	1.24	1.53	1.37	-0.305	-0.17	-0.01	-0.01	-0.07	0.66	-0.21	-0.68
116840	hSQ029635	|| CNTROB || centrobin, centrosomal BRCA2 interacting protein || || || || 116840 || hHC021974 || 1460692	2.65	2.57	0.87	0.37	1.68	1.74	-0.47	-0.38	-0.61	-0.67	0.16	-0.23	-0.15	-0.85	0.315	0.12	0.1	-0.23	-0.03	-0.44	0.75	1.66
1471	hSQ004928	|| CST3 || cystatin C (amyloid angiopathy and cerebral hemorrhage) || || || || 1471 || hHC027092 || 1460699	0.73	0.69	0.56	0.21	0.72	0.86	1.82	1.75	1.65	1.46	1.48	0.12	0.58	1.32	2.385	2.3	1.58	1.29	0.12	1.48	1.38	-1.07
8092	hSQ045025	|| CART1 || cartilage paired-class homeoprotein 1 || || || || 8092 || hHC012842 || 1460704	-0.49	-0.74	-0.55	-0.48	-0.37	-0.65	0.38	0.72	0.72	1.11	0.2	0.16	0.26	-0.23	-0.865	-0.72	-1.13	-0.65	-0.42	-0.04	-0.96	0.01
25844	hSQ042585	|| YIPF3 || Yip1 domain family, member 3 || || || || 25844 || hHC019894 || 1460732	0.77	0.61	0.85	0.3	0.19	0.12	1.29	1.54	1.79	1.65	1.46	0.27	0.59	0.89	1.255	1.24	1.01	0.64	0.42	0.32	1.34	1.18
55283	hSQ007415	|| MCOLN3 || mucolipin 3 || || || || 55283 || hHC005683 || 1460738	-1.43	-1.55	-1.88	-1.73	-1.93	-2.34	-0.63	-0.52	-1.02	-0.78	-1.44	-1.72	-1.08	-1.78	0.345	0.27	0.42	-0.19	-0.61	-0.61	-0.08	-1.4
57690	hSQ030070	|| TNRC6C || trinucleotide repeat containing 6C || || || || 57690 || hHC010619 || 1460742	-1.05	-0.93	-0.66	-0.35	-0.46	-0.85	-2.37	-2.12	-2.48	-3.31	-3.4	-1.66	-1.45	-3.03	0.415	0.4	0.19	0.43	1.03	0.26	0.25	-0.56
7345	hSQ038240	|| UCHL1 || ubiquitin carboxyl-terminal esterase L1 (ubiquitin thiolesterase) || || || || 7345 || hHC024986 || 1460744	0.44	0.06	-0.41	-0.03	0.14	0.29	0.72	0.36	1.04	-0.43	1.12	0.15	0.55	0.7	-0.105	0.08	0.76	0.25	0.06	0.97	1.16	-0.64
309	hSQ036148	|| ANXA6 || annexin A6 || || || || 309 || hHC016121 || 1460753	0.32	0.11	0.08	-0.03	-0.14	-0.2	-1.45	-1.76	-1.91	-2.61	-0.3	-0.95	-0.29	-1.08	-2.145	-1.8	-2.49	-2.02	-1.23	-0.93	-1.11	-0.14
9530	hSQ031787	|| BAG4 || BCL2-associated athanogene 4 || || || || 9530 || hHC029086 || 1460754	-0.64	-0.39	-0.18	-0.48	0.25	0.24	-0.45	-0.98	-0.11	0.04	-0.94	-0.04	-0.07	0.52	0.245	0.17	0.34	-0.05	0.75	0.58	0.36	1.38
230	hSQ010196	|| ALDOC || aldolase C, fructose-bisphosphate || || || || 230 || hHC017793 || 1460791	0.33	0.15	0.7	0.44	-0.13	-0.15	1	0.87	0.77	1.11	0.99	-0.14	0.68	0.47	0.375	0.67	0.49	-0.02	0.04	0.13	0.56	1.72
661	hSQ043034	|| POLR3D || polymerase (RNA) III (DNA directed) polypeptide D, 44kDa || || || || 661 || hHC020009 || 1460793	1.81	1.89	1.38	1.46	1.24	1.63	1.57	1.69	0.87	0.99	1.23	0.62	1.03	0.37	-1.025	-0.88	-1.4	-0.73	-0.37	-0.32	-0.15	-0.6
8943	hSQ018184	|| AP3D1 || adaptor-related protein complex 3, delta 1 subunit || || || || 8943 || hHC022989 || 1460798	1.27	1.3	0.58	0.14	0.12	0.29	-1.25	-1.24	-2.84	-3.19	-0.45	-1.64	-0.48	-1.12	-1.045	-0.87	-1.31	-2.01	-0.84	-1.07	-0.27	-1.19
3222	hSQ017226	|| HOXC5 || homeobox C5 || || || || 3222 || hHC013980 || 1460809	0.76	0.64	0.72	0.45	1.07	0.86	1.19	0.93	0.91	0.93	1.02	2.98e-09	1.07	0.54	0.635	0.66	0.18	-0.22	-0.17	-0.29	0.49	0.82
84258	hSQ011868	|| SYT3 || synaptotagmin III || || || || 84258 || hHC031987 || 1460830	1.45	1.17	0.9	0.41	0.71	0.7	1.56	1.73	1.6	1.26	1.66	0.2	1.11	0.15	0.795	0.92	0.62	0.3	0.01	-0.74	0.89	0.32
23587	hSQ013270	|| C17orf81 || chromosome 17 open reading frame 81 || || || || 23587 || hHC019483 || 1460865	0.29	0.31	0.6	0.33	0.44	0.35	0.59	0.63	0.48	0.53	0.42	0.11	0.53	0.63	0.655	0.86	0.24	0.21	0.31	0.29	0.6	1.08
6103	hSQ014399	|| RPGR || retinitis pigmentosa GTPase regulator || || || || 6103 || hHC013455 || 1460871	-0.57	-0.64	-1.04	-1.28	-0.81	-1.15	0.14	-0.07	-0.21	-0.05	-1.04	-0.78	-0.17	-1.34	-0.705	-0.98	-0.38	-0.52	0.13	-0.31	-1.03	-0.26
26155	hSQ008065	|| NOC2L || nucleolar complex associated 2 homolog (S. cerevisiae) || || || || 26155 || hHC028066 || 1460880	0.13	0.31	0.71	0.05	-0.1	0.15	0.12	-0.31	-0.33	-0.37	-0.37	-1.24	-0.52	-0.83	-0.095	0.06	-0.83	-1.36	-1.01	-1.47	0.01	-0.61
114049	hSQ006210	|| WBSCR22 || Williams Beuren syndrome chromosome region 22 || || || || 114049 || hHA040408 || 1460882	-1.31	-1.41	-1.36	-0.8	-1.27	-1.43	-2.09	-2.77	-1.79	-4	-1.01	-1.55	-0.56	-0.51	-2.785	-2.42	-2.15	-3.13	-0.85	-0.02	-0.44	-1.18
54497	hSQ032991	|| KIAA1414 || KIAA1414 protein || || || || 54497 || hHC006846 || 1460883	-0.69	-0.73	-1.6	-1.28	-1.19	-1.8	-1.22	-1.17	-1.2	-1.07	-1.49	-0.94	-1.15	-1.62	0.535	0.25	0.23	0.21	0.7	0.04	0.1	-0.81
8405	hSQ039685	|| SPOP || speckle-type POZ protein || || || || 8405 || hHC018894 || 1460884	-0.43	-0.54	-0.36	-0.57	-0.28	-0.72	-1.37	-1.36	-1.04	-0.88	-1.11	-0.6	-0.05	-1.09	-1.185	-1.25	-0.9	-0.95	0.03	0.22	-0.76	0.51
26018	hSQ020987	|| LRIG1 || leucine-rich repeats and immunoglobulin-like domains 1 || || || || 26018 || hHC009021 || 1460885	-0.86	-0.49	-0.88	-0.89	-0.41	-0.4	-1.93	-1.43	-1.34	-1.37	-1.96	-1.01	-0.51	-1.14	-1.325	-1.51	-1.47	-1.7	-0.44	-0.62	-0.65	-0.65
23587	hSQ011055	|| C17orf81 || chromosome 17 open reading frame 81 || || || || 23587 || hHA038099 || 1460897	0.17	0.15	1.06	0.71	0.47	0.55	0.15	0.03	0.63	0.47	-0.27	-0.05	0.34	0.26	0.585	0.43	0.16	-0.2	2.24e-10	0.55	0.79	1.4
7705	hSQ040722	|| ZNF146 || zinc finger protein 146 || || || || 7705 || hHC003187 || 1460903	-1.32	-1.41	-1.39	-2.03	-1.93	-1.9	-0.66	-0.29	-0.57	-0.45	-1.61	-1.6	-0.53	-2.18	-0.455	-0.69	-1.12	-1.5	-0.02	-0.63	-1.48	-0.39
60314	hSQ028744	|| C12orf10 || chromosome 12 open reading frame 10 || || || || 60314 || hHA039356 || 1460906	-0.03	-0.19	0.71	0.51	0.4	0.27	0.08	0.06	0.57	-0.99	1.14	0.01	-0.09	0.98	1.205	0.87	0.92	0.29	0.07	0.77	1.22	1.65
79752	hSQ045469	|| ZFAND1 || zinc finger, AN1-type domain 1 || || || || 79752 || hHC008438 || 1460921	-0.79	-0.8	-0.36	-0.45	-0.65	-0.89	0.36	0.48	0.92	1.21	0.07	0.22	-0.43	0.21	0.325	0.22	0.52	0.44	0.46	0.39	0.6	1.46
10755	hSQ029287	|| GIPC1 || GIPC PDZ domain containing family, member 1 || || || || 10755 || hHC022587 || 1460923	0.44	0.55	1.15	0.7	0.71	0.62	0.94	0.82	0.54	0.73	0.8	-0.14	0.58	0.56	0.495	0.71	0.69	-0.27	0.33	-0.38	1.34	0.44
593	hSQ033444	|| BCKDHA || branched chain keto acid dehydrogenase E1, alpha polypeptide || || || || 593 || hHC025185 || 1460934	0.45	0.43	0.88	0.35	0.17	0.12	1.01	0.92	0.66	0.36	0.96	-0.06	0.42	0.56	0.925	1.18	0.45	-0.1	0.3	-0.02	1.56	0.04
221908	hSQ024251	|| MGC22793 || hypothetical protein MGC22793 || || || || 221908 || hHA039222 || 1460937	-0.43	-0.67	0.15	0.03	0.52	0.1	0.95	0.98	0.76	0.58	1.35	-0.05	0.14	0.62	0.745	0.95	1.1	0.36	0.33	0.25	1.59	1.25
27090	hSQ017655	|| || || || || || || hHC021154 || 1460941	1.04	0.79	1.19	1.08	1.31	1.1	-0.52	-1.73	-2.01	-3.89	2.03	0.58	0.31	0.58	1.515	1.73	1.79	0.9	-0.3	0.13	1.5	0.67
55831	hSQ009111	|| TMEM111 || transmembrane protein 111 || || || || 55831 || hHA032904 || 1460950	1.21	1.16	0.98	0.62	1.4	1.19	2.46	2.42	1.87	1.81	2.1	1.28	1.62	1.54	0.405	0.28	0.02	-0.14	0.1	0.31	0.09	0.48
11059	hSQ007981	|| WWP1 || WW domain containing E3 ubiquitin protein ligase 1 || || || || 11059 || hHC031289 || 1460961	0.76	0.88	-0.07	0.62	0.73	0.9	-1.35	-1.46	0.04	-0.5	-0.37	0.92	0.29	1.2	-1.615	-1.42	-0.74	0.26	0.5	0.67	0.01	0.61
9726	hSQ002215	|| ZNF646 || zinc finger protein 646 || || || || 9726 || hHC027274 || 1460969	3.57	3.36	1.16	0.22	1.46	1.64	0.11	0.43	-0.12	-0.35	0.7	0.18	-1.34e-09	-0.79	2.915	2.38	1.67	1.05	1.5	0.61	2.16	-0.03
84148	hSQ027063	|| MYST1 || MYST histone acetyltransferase 1 || || || || 84148 || hHC025246 || 1460981	-0.29	-0.26	0.46	0.07	0.32	0.12	0.31	0.57	-0.27	-0.29	-0.32	-0.71	0.41	-0.45	-0.715	-0.67	-1.02	-1.36	-0.7	-0.45	-0.21	0.56
219	hSQ045031	|| ALDH1B1 || aldehyde dehydrogenase 1 family, member B1 || || || || 219 || hHC014548 || 1460994	-0.27	-0.26	-0.31	-0.42	-0.12	-0.2	-1.65	-1.64	-1.66	-1.59	-0.35	-0.32	0.05	-0.71	-2.015	-1.58	-1.61	-0.85	-0.31	-0.48	-0.87	0.83
201164	hSQ037420	|| LOC201164 || similar to CG12314 gene product || || || || 201164 || hHC004823 || 1460995	-0.79	-0.71	-0.45	-0.68	-0.46	-0.31	-0.51	-0.21	-0.06	0.18	-0.26	-0.51	-0.11	-0.51	0.995	0.89	1.58	0.72	0.66	0.52	0.78	1.18
22936	hSQ022947	|| ELL2 || elongation factor, RNA polymerase II, 2 || || || || 22936 || hHC014555 || 1461003	-0.27	-0.02	-0.2	-0.26	0.47	0.31	-0.12	0.1	0.4	0.36	-0.65	0.43	0.17	0.89	-0.115	-0.36	0.17	0.44	-0.1	-0.13	0.22	0.27
8125	hSQ037831	|| ANP32A || acidic (leucine-rich) nuclear phosphoprotein 32 family, member A || || || || 8125 || hHC030320 || 1461005	-0.97	-1.33	-0.67	-1.56	-0.93	-1.45	-2.99	-2.81	-3.07	-3.64	-1.54	-1.91	-1.67	-4.37	-3.945	-3.58	-3.47	-4.29	-4.23	-2.42	-2.59	-4.66
8802	hSQ029408	|| SUCLG1 || succinate-CoA ligase, GDP-forming, alpha subunit || || || || 8802 || hHC024144 || 1461010	0.21	0.35	0.07	-0.06	0.48	0.23	1.19	1.39	1.23	1.44	1.44	0.56	0.95	0.96	1.355	1.5	1.46	0.83	1.09	0.9	1.17	1.76
51256	hSQ038049	|| TBC1D7 || TBC1 domain family, member 7 || || || || 51256 || hHA036695 || 1461018	7.15e-09	0.01	0.18	0.17	0.02	0.27	0.25	0.33	1	0.99	0.54	0.24	0.67	0.84	0.585	0.65	0.83	0.93	0.64	0.84	0.88	0.31
54901	hSQ015044	|| CDKAL1 || CDK5 regulatory subunit associated protein 1-like 1 || || || || 54901 || hHC006440 || 1461025	-0.09	-0.07	0.35	-0.08	-0.26	-0.19	0.59	0.52	0.09	0.19	0.01	-0.31	0.3	-0.37	1.575	1.3	1.25	1.22	0.59	0.27	0.78	1.37
64080	hSQ013264	|| RBKS || ribokinase || || || || 64080 || hHC016220 || 1461030	-0.42	-0.36	0.28	0.15	-0.56	-0.48	-0.02	0.33	0.43	0.12	-0.47	-0.02	-0.21	-0.3	0.195	0.09	-0.2	-0.84	0.46	0.25	0.25	0.87
122769	hSQ027089	|| PPIL5 || peptidylprolyl isomerase (cyclophilin)-like 5 || || || || 122769 || hHC018470 || 1461031	-0.58	-0.57	-0.51	-0.66	-0.42	-0.29	0.41	0.16	0.78	0.49	0.89	0.09	-0.58	0.58	1.005	0.96	1.61	1.43	0.52	1.25	1.7	-0.31
56650	hSQ019402	|| CLDND1 || claudin domain containing 1 || || || || 56650 || hHC009536 || 1461033	-0.65	-0.61	-0.68	-0.63	-0.36	-0.32	0.44	0.46	1.06	0.91	0.2	0.1	-0.15	0.75	1.145	1.08	1.42	1.13	1.25	1.01	0.86	1.46
116028	hSQ037466	|| MGC24665 || hypothetical protein MGC24665 || || || || 116028 || hHC016925 || 1461040	-0.76	-0.73	-0.87	-0.86	-0.55	-0.59	-0.28	-0.23	-0.01	-0.41	0.24	-0.52	-0.34	0.08	0.065	0.22	0.36	0.14	0.53	0.78	1.09	0.77
57460	hSQ013561	|| PPM1H || protein phosphatase 1H (PP2C domain containing) || || || || 57460 || hHC008004 || 1461043	0.39	0.58	0.09	0.16	0.31	0.23	-0.58	-0.46	-0.54	-0.31	-0.5	-0.42	0.16	-0.69	-0.735	-1	-0.71	-0.39	-0.02	-0.29	-0.37	-0.49
9191	hSQ015741	|| DEDD || death effector domain containing || || || || 9191 || hHC020060 || 1461053	1.36	1.25	1.33	0.92	0.86	0.95	0.08	0.31	0.69	0.48	0.8	0.14	0.44	-0.07	0.495	0.69	0.99	0.28	0.63	1.02	1.26	1.88
55128	hSQ033056	|| TRIM68 || tripartite motif-containing 68 || || || || 55128 || hHC004331 || 1461064	0.11	0.22	0.03	-0.05	-0.34	-0.92	-0.64	-0.2	-0.05	-0.07	-0.5	-0.43	0.34	-0.67	0.295	0.04	-0.42	0.32	0.33	0.04	0.1	0.64
29927	hSQ015106	|| SEC61A1 || Sec61 alpha 1 subunit (S. cerevisiae) || || || || 29927 || hHC018534 || 1461067	0.36	0.44	7.15e-09	-0.51	0.18	0.44	-0.21	-0.37	-0.58	-0.75	0.07	-0.48	0.23	-0.09	0.045	0.04	-0.1	-0.43	0.1	-0.51	0.03	-0.59
56947	hSQ019725	|| C2orf33 || chromosome 2 open reading frame 33 || || || || 56947 || hHA038928 || 1461072	0.09	-0.03	0.18	-0.26	0.13	-0.06	1.01	1.09	1.23	1.12	0.77	-0.01	0.58	0.36	0.335	0.29	0.75	0.43	0.23	0.39	-0.05	0.91
10644	hSQ041185	|| IGF2BP2 || insulin-like growth factor 2 mRNA binding protein 2 || || || || 10644 || hHC029446 || 1461074	0.72	0.98	0.86	0.36	0.17	0.56	0.58	0.7	-0.48	-0.04	-1.04	-0.23	0.18	-0.73	-0.505	-0.2	-1.02	-1.01	-0.05	-0.44	-1.09	0.4
3236	hSQ004398	|| HOXD10 || homeobox D10 || || || || 3236 || hHC018539 || 1461075	-0.48	-0.44	-1.12	-1.21	-1.19	-1.24	-0.64	-0.64	-0.66	-0.66	-0.85	-1.45	-0.73	-1.19	-0.485	-0.44	-0.76	-0.85	-0.68	-0.86	-0.62	-1.73
90378	hSQ011704	|| SAMD1 || sterile alpha motif domain containing 1 || || || || 90378 || hHC026491 || 1461092	2.13	2.14	1.83	1.68	1.39	1.28	1.34	1.36	0.89	0.65	1.35	0.4	0.56	-8.94e-10	0.575	0.78	0.38	-0.5	-0.65	-0.46	0.47	0.7
7589	hSQ017843	|| ZNF38 || zinc finger protein 38 || || || || 7589 || hHC003749 || 1461099	-0.82	-0.7	-0.65	-1.1	-0.87	-0.79	-0.27	-0.51	-0.49	-0.45	-0.52	-1.07	-0.1	-1.36	-0.655	-0.73	-0.65	-0.56	0.22	-0.27	-0.68	-0.49
23339	hSQ042058	|| VPS39 || vacuolar protein sorting 39 (yeast) || || || || 23339 || hHC010823 || 1461106	0.16	0.2	0.07	-0.23	0.33	-0.01	-0.54	-0.53	-0.43	-0.42	-0.44	-0.56	0.14	-0.25	-0.945	-0.73	-1.2	-0.74	-0.58	-0.74	-0.16	0.23
10059	hSQ041294	|| DNM1L || dynamin 1-like || || || || 10059 || hHA035926 || 1461115	-0.82	-0.78	-1.17	-1.22	-0.92	-0.91	-2.01	-2.16	-1.28	-1.85	-1.21	-0.87	-0.42	-0.72	-1.475	-1.81	-1.15	-0.41	-0.21	-0.17	-0.73	-0.93
338657	hSQ037399	|| DLNB14 || similar to DLNB14 || || || || 338657 || hHC029609 || 1461121	-0.48	-0.56	-0.97	-0.83	-0.27	-0.66	1.5	1.49	0.29	0.21	0.94	-0.84	0.01	-0.67	0.275	0.4	-0.19	-0.44	0.19	-0.08	0.26	0.07
192683	hSQ017439	|| SCAMP5 || secretory carrier membrane protein 5 || || || || 192683 || hHC018028 || 1461146	1.3	1.22	1.13	0.85	0.99	1.07	1.11	1.29	1.18	1.32	1	0.54	0.18	-0.05	2.175	2.04	1.7	1.24	0.29	0.18	1.16	2.25
3613	hSQ042723	|| IMPA2 || inositol(myo)-1(or 4)-monophosphatase 2 || || || || 3613 || hHC023199 || 1461166	0.12	0.07	0.25	0.49	0.35	-0.14	-0.45	-0.67	-0.34	-0.55	-0.28	-0.64	-0.28	-0.22	-1.315	-1.48	-1.56	-1.47	-1.14	-0.95	-0.56	-0.62
348926	hSQ022637	|| LOC348926 || hypothetical protein LOC348926 || || || || 348926 || hHC029748 || 1461172	-1.04	-1	-0.28	-0.76	-0.12	-0.22	0.28	-0.15	0.33	0.65	0.16	-0.37	0.24	0.27	0.495	0.87	1.04	0.4	0.67	0.9	1.23	2.07
79699	hSQ037244	|| ZYG11B || zyg-11 homolog B (C. elegans) || || || || 79699 || hHC005379 || 1461174	-1.53	-1.37	-0.65	-0.88	-0.99	-1.09	-2.64	-3.75	-2.08	-2.13	-2.62	-1.4	-1.54	-2.15	-1.395	-2	-1.27	-0.51	-0.72	-1.02	-1.04	-1.5
55101	hSQ015166	|| FLJ10241 || hypothetical protein FLJ10241 || || || || 55101 || hHC007594 || 1461176	0.74	0.55	0.94	0.59	0.84	0.7	1.52	1.41	1.8	1.9	1.51	0.47	0.91	1.05	1.585	1.63	1.54	0.91	0.48	0.69	1.2	2.12
9672	hSQ037374	|| SDC3 || syndecan 3 (N-syndecan) || || || || 9672 || hHC019625 || 1461177	2.43	2.42	1.44	0.7	0.69	0.78	1.23	1.18	0.66	0.35	1.07	0.35	0.15	0.14	1.295	1.07	0.91	0.79	1	0.82	1.57	1.96
2035	hSQ029602	|| EPB41 || erythrocyte membrane protein band 4.1 (elliptocytosis 1, RH-linked) || || || || 2035 || hHC011876 || 1461178	-0.25	-0.31	-0.68	-0.62	-0.53	-0.75	-0.42	-0.07	-0.66	-0.8	-1.03	-0.89	-0.05	-0.8	-0.255	-0.32	-0.9	-1.18	-0.83	-1.05	-0.68	-0.22
55683	hSQ043908	|| FLJ10081 || hypothetical protein FLJ10081 || || || || 55683 || hHC007599 || 1461186	-0.67	-0.64	-0.54	-1.39	-1.39	-1.88	-0.71	-0.82	-0.74	-0.89	-1.03	-1.29	0.02	-1.34	-0.915	-1.02	-0.82	-0.63	0.11	-0.57	-0.4	0.43
3396	hSQ035626	|| ICT1 || immature colon carcinoma transcript 1 || || || || 3396 || hHC015834 || 1461200	-0.79	-0.61	-0.79	-1.14	-0.04	-0.29	0.45	0.4	-0.16	0.53	-0.16	0.01	0.19	0.92	-0.835	-0.81	-0.74	-1.59	-0.17	0.3	-1.15	0.32
2934	hSQ015425	|| GSN || gelsolin (amyloidosis, Finnish type) || || || || 2934 || hHC019023 || 1461206	-0.25	-0.28	-0.12	-0.62	-1.15	-1.39	0.38	0.13	0.36	0.31	-9.54e-09	-1.33	-0.11	-1.27	0.275	0.34	-0.16	-0.52	-0.26	-0.72	0.39	0.3
9869	hSQ017371	|| SETDB1 || SET domain, bifurcated 1 || || || || 9869 || hHC006984 || 1461214	0.8	0.97	0.8	0.4	0.49	0.19	-0.22	-0.02	-0.6	-0.56	-0.9	-0.81	0.2	-1.22	0.375	0.07	-0.27	-0.29	0.21	-0.09	0.5	0.37
29110	hSQ022540	|| TBK1 || TANK-binding kinase 1 || || || || 29110 || hHC011963 || 1461219	-1.36	-1.2	-1.59	-1.23	-1.03	-1.3	-0.74	-0.46	-0.08	0.21	-0.89	-0.73	-0.42	-0.56	-0.585	-0.51	-0.29	-0.3	0.41	0.02	-0.54	0.65
[truncated: 9,127 more rows]

## Sheet: Ago2_vs_mock_IP_out
entrez_id	sequence_id	description	sam_score	sam_numerator	sam_denominator	fold_change	fdr	local_fdr
[truncated: 10,818 more rows]

## Sheet: Ago2_vs_mock_EXP_in
entrez_id	sequence_id	description	mock Expression (#1)	mock Expression (#2)	mock Expression (#3)	Ago2 Expression (#1)	Ago2 Expression (#2)	Ago2 Expression (#3)
[truncated: 12,931 more rows]

[truncated: 1 more sheets: Ago2_vs_mock_EXP_out]
