# Supplementary material for: Systematic Identification of mRNAs Recruited to Argonaute 2 by Specific microRNAs and Corresponding Changes in Transcript Abundance
Source: PLoS One. 2008 May 7;3(5):e2126. doi: 10.1371/journal.pone.0002126 (PMC2330160; doi:10.1371/journal.pone.0002126)
Supplement: Dataset S2 — Ago2/miR-1 versus Ago2, IP and expression HEEBO microarray data (14.85 MB XLS) [file pone.0002126.s005.xls]

## Sheet: key
worksheets:
Ago2_vs_Ago2miR1_IP_SAM_in = Batch normalized microarray data from Ago2 + miR-1 and Ago2 IPs.
Ago2_vs_Ago2miR1_IP_SAM_out = SAM output plus other information.
Ago2_vs_Ago2miR1_EXP_SAM_in = = Normalized microarry data from Ago2 + miR-1 and Ago2 and mock expression analyses.
Ago2_vs_Ago2miR1_EXP_SAM_out = SAM ouput plus other information.
key to SAM output worksheets:
refseq
entrez_id
description
sam_score = D score from SAM. Similar to t-score.
sam_numerator = log2 of fold change between average Ago2 values and mock values.
sam_denominator = standard deviation plus SAM fudge factor.
fold_change
fdr = q-value from SAM.
local_fdr = local FDR from SAM.
X3UTR_6mer_n2_7 = 3'-UTR 6mer_n2-7 seed match
X3UTR_6mer_n3_8 = 3'-UTR 6mer_n3-8 seed match
X3UTR_7merm8 = 3'-UTR 7mer-m8 seed match
X3UTR_7merA1 = 3'-UTR 7mer-A1 seed match
X3UTR_8mer = 3'-UTR 8mer seed match
targetscan3.0 = if yes, 1, else 0.
pictar5way = if yes, 1, else 0.
miranda = if yes, 1, else 0.
lim_expression = if significantly down-regulated in Lim et al. 2005 1, else 0.
targetscan4.0_conserved = if yes, 1, else 0.
targetscan4.0_nonconserved = if yes, 1, else 0.
targetscan4.0_cum_cs = Cumulative context score.
PITA_315 = DDG value for interaction with miRNA.
ORFn2_7 = coding sequence 6mer_n2-7 seed match
ORFn3_8 = coding sequence 6mer_n3-8 seed match
ORF_7merm8 = coding sequence 7mer-m8 seed match
ORF_7merA1 = coding sequence 7mer-A1 seed match
ORF_8mer = coding sequence 8mer seed match
X5UTRn2_7 = 5'-UTR 6mer_n-7 seed match
X5UTRn3_8 = 5'-UTR 6mer_n3-8 seed match
X5UTR_7merm8 = 5'-UTR 7mer-m8 seed match
X5UTR_7merA1 = 5'-UTR 7mer-A1 seed match
X5UTR_8mer = 5'-UTR 8mer seed match
X3UTR_hs_s7merA1 = Human 3'-UTR 7mer-A1 seed match in human, dog, mouse, rat multiple alighment file
X3UTR_con_s7merA1 = Conserved 3'-UTR 7mer-m8 seed match in human, dog, mouse, rat multiple alighment file
X3UTR_hs_s7merm8 = Human 3'-UTR 7mer-m8 seed match in human, dog, mouse, rat multiple alighment file
X3UTR_con_s7merm8 = Conserved 3'-UTR 7mer-m8 seed match in human, dog, mouse, rat multiple alighment file
ORF_hs_s7merA1 = Human coding sequence 7mer-A1 seed match in human, dog, mouse, rat multiple alighment file
ORF_con_s7merA1 = Conserved coding sequence 7mer-m8 seed match in human, dog, mouse, rat multiple alighment file
ORF_hs_s7merm8 = Human coding sequence 7mer-m8 seed match in human, dog, mouse, rat multiple alighment file
ORF_con_s7merm8 = Conserved coding sequence 7mer-m8 seed match in human, dog, mouse, rat multiple alighment file

## Sheet: Ago2_vs_Ago2miR1_IP_SAM_in 
entrez_id	description	Ago2 IP (#1)|| BATCH GROUP 1	Ago2 IP (#2)|| BATCH GROUP 1	Ago2 IP (#3)|| BATCH GROUP 1	Ago2 IP (#4)|| BATCH GROUP 1	Ago2 IP (#5)|| BATCH GROUP 2	Ago2 IP (#6)|| BATCH GROUP 2	Ago2 IP (#7)|| BATCH GROUP 2	Ago2 IP (#8)|| BATCH GROUP 3	Ago2 + miR-1 IP (#1)|| BATCH GROUP 2	Ago2 + miR-1 IP (#2)|| BATCH GROUP 2	Ago2 + miR-1 IP (#3)|| BATCH GROUP 3
1	A1BG || alpha-1-B glycoprotein (1)	0.41	0.12	-0.12	-1.08	-2.53e-08	-0.113	1.12	-0.287	0.14	-0.21	-0.237
100	ADA || adenosine deaminase (2)	0.025	0.345	-0.025	-0.72	-0.38	-0.163	0.57	0.2	0.165	5.96e-10	-0.2
1000	CDH2 || cadherin 2, type 1, N-cadherin (neuronal) (1)	0.24	0.63	-0.47	-0.24	0.665	0.197	-1.28	-0.0025	0.18	-0.04	0.0025
10001	MED6 || mediator of RNA polymerase II transcription, subunit 6 homolog (yeast) (1)	-0.125	0.105	0.255	-0.105	0.43	0.777	-0.47	-0.085	1.09	0.42	0.265
10005	PTE1 || peroxisomal acyl-CoA thioesterase (2)	0.025	0.055	-0.025	-0.34	-0.63	0.037	0.885	-0.34	-0.075	-0.04	-0.82
10007	GNPDA1 || glucosamine-6-phosphate deaminase 1 (2)	-0.105	-0.465	0.41	0.105	-0.52	0.067	0.04	0.132	2.62e-08	-0.18	-0.028
10009	ZBTB33 || zinc finger and BTB domain containing 33 (2)	-0.02	-0.22	0.02	0.91	0.013	-1.79e-09	-0.042	0.175	0.293	0.613	-0.175
10011	SRA1 || steroid receptor RNA activator 1 (3)	-0.102	-0.0875	0.198	0.0875	-0.0645	0.28	-0.0205	0.05	8.34e-09	0.506	-0.2
10013	HDAC6 || histone deacetylase 6 (1)	0.69	0.47	-0.47	-0.63	0.18	-0.183	2.15e-08	0.04	0.5	-0.98	-0.04
10014	HDAC5 || histone deacetylase 5 (3)	-0.781	-0.151	0.498	0.151	-0.43	-1.11	0.7	0.034	-0.315	0.27	-0.034
10015	PDCD6IP || programmed cell death 6 interacting protein (1)	-0.15	0.15	-0.59	0.43	0.113	5.96e-09	-0.987	0.452	-0.157	-1.15	-0.168
10016	PDCD6 || programmed cell death 6 (2)	-0.0375	-0.422	0.203	0.0375	0.125	0.367	-0.47	0.28	-0.025	-3.28e-09	-0.665
10018	BCL2L11 || BCL2-like 11 (apoptosis facilitator) (3)	0.18	-0.23	0.17	-0.17	0.00333	-0.0147	1.83e-09	-0.668	0.146	-1.88	-0.262
10020	GNE || glucosamine (UDP-N-acetyl)-2-epimerase/N-acetylmannosamine kinase (1)	-0.01	-0.25	0.01	0.13	-0.12	0.227	-2.62e-08	0.27	0.3	0.85	-0.22
10024	TROAP || trophinin associated protein (tastin) (1)	0.04	0.03	-0.03	-0.29	-0.23	-0.573	0.57	-0.258	0.01	-0.37	0.782
10025	THRAP5 || thyroid hormone receptor associated protein 5 (2)	-0.45	0.175	0.23	-0.175	-0.9	-0.168	1.43	-0.0975	-0.415	5.96e-09	0.0975
10036	CHAF1A || chromatin assembly factor 1, subunit A (p150) (3)	0.245	0.115	-1.22	-0.115	-3.72e-08	-0.183	0.27	0.02	-0.07	0.91	-0.02
10038	PARP2 || poly (ADP-ribose) polymerase family, member 2 (2)	-0.0075	0.0075	-0.128	0.228	0.228	-1.49e-09	-0.727	-0.438	0.788	0.283	0.282
10040	TOM1L1 || target of myb1-like 1 (chicken) (2)	-0.642	-0.302	0.507	0.302	-0.235	0.262	-0.64	-0.383	-1.19e-08	-0.27	-0.618
10042	HMG2L1 || high-mobility group protein 2-like 1 (3)	-0.035	0.035	-0.585	0.945	0.25	0.067	-0.11	-0.128	0.07	-1.39	-0.028
10049	DNAJB6 || DnaJ (Hsp40) homolog, subfamily B, member 6 (4)	0.073	-0.39	-0.073	0.167	0.093	0.448	-0.382	0.216	4.17e-10	0.205	1.28
10051	SMC4L1 || SMC4 structural maintenance of chromosomes 4-like 1 (yeast) (2)	-0.085	0.085	-0.365	0.5	1.12	0.752	-0.585	-0.0335	-0.155	0.1	0.0335
10054	UBA2 || SUMO-1 activating enzyme subunit 2 (3)	-0.185	-0.08	0.08	0.518	0.17	0.404	-0.63	0.859	-0.017	0.415	-0.528
10055	SAE1 || SUMO-1 activating enzyme subunit 1 (3)	-0.224	-0.283	0.224	0.353	-0.747	0.23	-0.207	-0.406	0.35	-5.96e-10	-0.525
10056	FARSLB || phenylalanine-tRNA synthetase-like, beta subunit (2)	-0.185	-0.005	0.005	0.065	3.58e-09	0.472	-0.025	0.469	-0.183	-0.12	-1.72
10058	ABCB6 || ATP-binding cassette, sub-family B (MDR/TAP), member 6 (1)	0.28	0.51	-0.28	-1.07	-1.46e-08	0.087	0.265	-0.0025	-0.05	0.32	0.0025
10059	DNM1L || dynamin 1-like (3)	-0.139	-0.248	0.139	0.351	-2.98e-09	0.264	-0.09	-0.408	0.343	-0.16	-0.0815
10061	ABCF2 || ATP-binding cassette, sub-family F (GCN20), member 2 (1)	-0.11	0.08	-0.08	0.33	-0.2	0.012	-2.86e-08	-0.0725	0.17	-0.34	0.0725
10062	NR1H3 || nuclear receptor subfamily 1, group H, member 3 (2)	0.12	0.78	-0.12	-0.28	-0.55	0.032	0.065	-0.173	-0.08	0.155	-0.402
10063	COX17 || COX17 homolog, cytochrome c oxidase assembly protein (yeast) (2)	0.647	0.618	-0.998	-0.618	0.315	0.252	-1.52	-0.0525	-1.43e-08	0.09	0.0525
10066	SCAMP2 || secretory carrier membrane protein 2 (2)	0.12	-4.1e-09	-3.28e-09	-0.38	-0.885	-0.273	0.19	-0.353	-0.2	0.11	-0.853
10067	SCAMP3 || secretory carrier membrane protein 3 (3)	-0.025	0.125	0.025	-0.385	-0.987	2.79e-08	0.45	-0.005	-0.393	-0.135	0.005
10072	DPP3 || dipeptidylpeptidase 3 (13)	-0.325	0.486	0.155	-0.155	-1.36	-0.945	0.48	-0.321	-1.06	-0.912	-0.064
10073	RNUT1 || RNA, U transporter 1 (1)	0.07	-0.05	0.03	-0.03	5.07e-09	0.467	-0.12	0.14	0.64	0.53	-0.14
10076	PTPRU || protein tyrosine phosphatase, receptor type, U (1)	0.715	0.095	-0.095	-1.16	2.98e-10	-0.883	0.09	-0.675	-0.1	-0.78	0.565
10079	ATP9A || ATPase, Class II, type 9A (2)	-0.085	-0.3	0.085	0.085	0.598	2.24e-10	0.348	0.144	0.143	-0.152	0.455
10081	PDCD7 || programmed cell death 7 (2)	-2.98e-10	-0.215	0.02	0	-6.26e-09	-0.163	-0.205	0.052	0.445	0.425	0.177
10087	COL4A3BP || collagen, type IV, alpha 3 (Goodpasture antigen) binding protein (2)	-0.085	0.085	-0.655	0.835	-0.375	-0.793	-0.11	-0.025	0.373	0.11	0.025
10090	UST || uronyl-2-sulfotransferase (2)	-0.58	0.02	-0.02	0.385	0.078	-1.79e-08	-0.347	0.235	0.953	1.41	0.485
10092	ARPC5 || actin related protein 2/3 complex, subunit 5, 16kDa (2)	-0.01	-0.1	0.01	1.17	0.128	0.36	-0.477	-0.47	0.803	1.37	0.335
10093	ARPC4 || actin related protein 2/3 complex, subunit 4, 20kDa (1)	-0.12	0.19	0.12	-0.8	-0.477	3.73e-10	0.883	-0.738	-0.177	-0.567	0.032
10094	ARPC3 || actin related protein 2/3 complex, subunit 3, 21kDa (2)	0.228	0.417	-0.228	-0.677	7.45e-11	0.367	-1.23	-0.285	1.29	1.04	0.96
10095	ARPC1B || actin related protein 2/3 complex, subunit 1B, 41kDa (2)	-0.08	0.69	0.08	-1.38	-0.12	0.007	-1.67e-08	-0.856	-0.07	-0.44	-0.345
10096	ACTR3 || ARP3 actin-related protein 3 homolog (yeast) (1)	-0.225	-0.095	0.095	0.545	0.27	0.012	-1.3	-0.098	-0.405	0.21	0.022
10097	ACTR2 || ARP2 actin-related protein 2 homolog (yeast) (3)	-0.2	-0.36	0.2	1.03	0.48	0.567	-0.64	0.38	0.317	-0.67	-0.38
10098	TSPAN5 || tetraspanin 5 (2)	-0.155	0.035	-0.035	0.845	0.0475	-0.305	-0.0475	0.167	0.547	-1.94	-1.06
10099	TSPAN3 || tetraspanin 3 (2)	-0.195	0.195	0.485	-0.745	0.21	0.787	-0.35	0.562	1.64e-09	0.275	-0.198
10101	NUBP2 || nucleotide binding protein 2 (MinD homolog, E. coli) (2)	0.13	0.45	-0.13	-1.21	-0.65	-0.328	1.29	-0.38	-0.4	-0.305	-0.16
10105	PPIF || peptidylprolyl isomerase F (cyclophilin F) (1)	-0.015	0.015	0.275	-0.365	-0.23	-0.023	-0.22	0.117	-4.77e-09	-0.01	-0.363
10106	CTDSP2 || CTD (carboxy-terminal domain, RNA polymerase II, polypeptide A) small phosphatase 2 (1)	-0.175	-0.075	0.515	0.075	-0.16	-0.333	-1.19e-08	-0.775	-1.32	-0.34	-0.535
10111	RAD50 || RAD50 homolog (S. cerevisiae) (1)	1	0.83	-1.47	-0.83	0.719	0.436	-0.561	0.22	0.149	-1.32	-0.22
10112	KIF20A || kinesin family member 20A (2)	0.27	0.245	-0.28	-0.245	3.28e-09	0.067	-0.29	0.025	0.085	0.03	-0.025
10113	PREB || prolactin regulatory element binding (1)	0.255	0.305	-0.255	-0.285	-1.49e-09	-0.193	-0.22	0.064	0.31	0.17	-0.086
10116	FEM1B || fem-1 homolog b (C. elegans) (1)	-0.01	0.01	-0.36	0.23	0.07	-0.123	-0.16	-0.225	4.17e-09	0.17	0.225
10120	ACTR1B || ARP1 actin-related protein 1 homolog B, centractin beta (yeast) (1)	-0.005	0.565	0.005	-0.395	0.07	-0.163	0.3	0.262	-0.49	-0.36	-0.578
10121	ACTR1A || ARP1 actin-related protein 1 homolog A, centractin alpha (yeast) (2)	0.0475	0.0725	-0.0475	-0.412	-0.637	-0.63	0.0934	0.04	-0.0867	-0.237	-0.04
10123	ARL7 || ADP-ribosylation factor-like 7 (2)	0.125	-0.125	0.295	-0.51	0.085	-0.178	-4.77e-09	-0.418	0.145	0.13	0.742
10126	DNAL4 || dynein, axonemal, light polypeptide 4 (1)	0.315	0.365	-0.315	-0.565	0.11	-0.043	0.56	0.117	-2.62e-08	-0.26	-0.133
10127	ZNF263 || zinc finger protein 263 (1)	0.05	3.88e-08	-0.56	0	2.47e-08	-0.353	-0.96	0.085	0.25	0.01	-0.085
10128	LRPPRC || leucine-rich PPR-motif containing (1)	-0.11	0.05	-0.05	0.31	0.45	0.307	-0.37	-0.14	0.59	0.69	0.35
10131	TRAP1 || TNF receptor-associated protein 1 (3)	-0.536	0.167	0.167	-0.167	-0.23	0.417	0.827	-0.263	-0.073	1.73e-08	-0.0267
10133	OPTN || optineurin (1)	0.205	0.095	-1.16	-0.095	0.36	0.367	-0.59	0.055	0.21	-8.94e-09	-0.055
10135	PBEF1 || pre-B-cell colony enhancing factor 1 (5)	-0.637	-0.403	0.403	0.733	4.83e-09	0.541	-0.318	0.074	0.072	-0.0227	-0.074
10137	RBM12 || RNA binding motif protein 12 (2)	0.0025	-0.0025	-0.0125	0.233	0.215	-0.423	-0.765	-0.095	0.11	-0.215	0.095
10139	ARFRP1 || ADP-ribosylation factor related protein 1 (2)	0.107	0.393	-0.107	-0.792	0.43	-0.103	1.21	-0.676	-1.19e-08	-0.79	0.592
10140	TOB1 || transducer of ERBB2, 1 (1)	0.125	-0.115	-0.095	0.095	-0.06	-0.353	-1.09	-0.125	-0.32	2.68e-08	0.125
10142	AKAP9 || A kinase (PRKA) anchor protein (yotiao) 9 (1)	0.335	0.325	-0.325	-0.635	0.416	0.173	0.386	0.995	-0.554	-0.174	0.125
10144	FAM13A1 || family with sequence similarity 13, member A1 (1)	0.015	-0.015	-0.105	1.08	0.14	-0.633	-3.58e-09	0.047	0.085	-1.5	-0.403
10146	G3BP || Ras-GTPase-activating protein SH3-domain-binding protein (4)	-0.329	-0.094	0.094	0.781	-0.19	0.142	-0.475	0.027	-0.282	0.48	-0.293
10147	SFRS14 || splicing factor, arginine/serine-rich 14 (3)	0.335	0.265	-0.855	-0.265	0.43	0.117	0.457	0.357	3.58e-08	-0.37	0.027
10150	MBNL2 || muscleblind-like 2 (Drosophila) (3)	-0.164	0.123	0.447	-0.123	0.37	-0.173	-0.375	-0.523	-0.593	0.08	-0.417
10152	ABI2 || abl interactor 2 (3)	-0.679	-0.203	0.65	0.203	0.523	0.634	0	-0.071	0.24	-0.1	0.071
10159	ATP6AP2 || ATPase, H+ transporting, lysosomal accessory protein 2 (5)	-0.687	-0.176	0.176	0.322	0.118	0.947	0.094	0.22	0.272	-4.17e-09	-0.22
10160	FARP1 || FERM, RhoGEF (ARHGEF) and pleckstrin domain protein 1 (chondrocyte-derived) (2)	-5.21e-09	-4.1e-09	-0.34	0.03	-0.06	-0.428	0.205	-0.14	0.06	-3.82	0.1
10162	C3F || putative protein similar to nessy (Drosophila) (1)	-0.01	0.01	0.39	-0.06	-0.22	-0.523	0.43	-0.978	0.09	-0.3	-0.138
10163	WASF2 || WAS protein family, member 2 (2)	-0.04	-0.08	0.04	0.915	-0.77	-0.798	0.175	-0.416	-2.98e-10	-1.02	0.114
10165	SLC25A13 || solute carrier family 25, member 13 (citrin) (3)	-0.547	-0.427	0.427	0.793	0.14	0.367	0.186	0.218	0.136	-0.774	-0.174
1017	CDK2 || cyclin-dependent kinase 2 (2)	-0.453	-0.223	0.637	0.223	-0.572	-2.5e-08	-0.297	-0.645	-0.792	-0.732	-0.51
10171	RCL1 || RNA terminal phosphate cyclase-like 1 (3)	-0.416	-0.146	0.604	0.146	-0.533	0.694	-2.57e-08	0.0583	-0.55	0.197	-0.797
10175	CNIH || cornichon homolog (Drosophila) (1)	-0.09	-0.03	0.03	0.25	-0.12	0.027	-1.29	0.56	-0.73	-0.2	-0.56
10180	RBM6 || RNA binding motif protein 6 (1)	0.4	-0.21	-0.32	0.21	0.888	2.98e-08	0.153	0.122	0.143	0.793	0.062
10186	LHFP || lipoma HMGIC fusion partner (1)	-0.175	0.175	-0.075	0.075	0.46	0.347	-2.38e-08	0.517	0.51	-0.32	-0.188
10188	TNK2 || tyrosine kinase, non-receptor, 2 (1)	0.04	-0.04	0.14	-1.49	0.27	-0.823	0.95	-0.443	-0.74	-1.45	0.617
10189	THOC4 || THO complex 4 (2)	0.102	0.472	-0.102	-0.703	-0.25	0.022	0.74	-0.085	0.135	0.015	0.085
1019	CDK4 || cyclin-dependent kinase 4 (3)	-0.0815	0.0815	0.189	-0.288	-1.17	-3.22e-08	0.463	-0.055	-0.197	0.473	0.055
10190	TXNDC9 || thioredoxin domain containing 9 (1)	-0.545	-0.185	0.185	0.245	0.0965	0.0935	-0.614	0.365	-0.324	-0.0935	-0.365
10194	SDCCAG33 || serologically defined colon cancer antigen 33 (1)	0.01	-0.01	-0.87	0.23	-0.14	-0.533	-0.98	-0.16	0.03	-4.47e-08	0.16
10195	ALG3 || asparagine-linked glycosylation 3 homolog (yeast, alpha-1,3-mannosyltransferase) (3)	0.255	0.045	-0.045	-0.465	-1.2	-2.74e-08	0.243	-0.165	-0.647	-0.107	0.165
10197	PSME3 || proteasome (prosome, macropain) activator subunit 3 (PA28 gamma; Ki) (1)	0.315	0.585	-0.315	-0.455	-0.33	-0.213	-0.2	-0.245	0.37	1.25e-08	0.245
10198	MPHOSPH9 || M-phase phosphoprotein 9 (1)	-0.415	-0.605	0.745	0.415	0.5	0.407	-0.725	0.378	0.115	-0.02	-0.128
102	ADAM10 || a disintegrin and metalloproteinase domain 10 (1)	-0.33	-0.07	0.07	0.98	0.294	0.251	-0.0958	0.38	0.384	-2.48	-0.38
1020	CDK5 || cyclin-dependent kinase 5 (1)	0.15	-8.87e-09	-8.05e-09	-0.1	-0.24	0.057	0.48	0.385	1.01	0.83	-0.035
10201	NME6 || non-metastatic cells 6, protein expressed in (nucleoside-diphosphate kinase) (2)	-0.0425	-0.0225	0.427	0.0225	-0.497	5.96e-09	0.018	-0.355	-0.282	-0.222	-0.065
10204	NUTF2 || nuclear transport factor 2 (2)	-0.102	0.102	0.122	-0.767	-1.07	-1.31e-08	-0.937	0.167	-0.557	-0.072	-0.423
10206	RFP2 || ret finger protein 2 (2)	0.27	0.06	-0.06	-0.19	0.418	-0.875	0.188	-0.125	-0.122	0.718	0.125
10208	C13orf22 || chromosome 13 open reading frame 22 (1)	-0.26	-0.37	0.26	0.39	0.33	0.517	-0.24	0.42	-0.07	0.41	-0.31
10210	TOPORS || topoisomerase I binding, arginine/serine-rich (1)	0.19	0.09	-0.58	-0.09	0.605	0.312	-0.095	0.345	0.015	0.165	-0.345
10211	FLOT1 || flotillin 1 (3)	-0.055	0.302	0.055	-0.335	-0.307	3.93e-08	0.933	-0.502	-0.15	-0.407	-0.065
10212	DDX39 || DEAD (Asp-Glu-Ala-Asp) box polypeptide 39 (3)	0.001	-0.001	0.243	-0.139	-0.207	0.074	0.22	0.0895	-0.287	0.04	0.186
10217	CTDSPL || CTD (carboxy-terminal domain, RNA polymerase II, polypeptide A) small phosphatase-like (3)	-0.0775	-0.147	0.0775	0.362	-0.455	-0.098	0.36	0.0045	0.002	-0.278	-0.263
1022	CDK7 || cyclin-dependent kinase 7 (MO15 homolog, Xenopus laevis, cdk-activating kinase) (3)	-0.607	-0.387	0.643	0.387	0.928	1.5	-0.005	0.552	6.68e-09	-0.222	-0.297
10224	ZNF443 || zinc finger protein 443 (2)	0.477	0.177	-0.388	-0.177	0.307	0.0337	-0.278	0.265	0.317	0.0267	-0.265
10227	TETRAN || tetracycline transporter-like protein (2)	-0.02	0.02	0.29	-0.705	-0.222	-4.77e-09	1.27	0.075	-0.082	-0.037	-0.075
10230	NBR2 || neighbor of BRCA1 gene 2 (1)	-0.49	-0.17	0.17	0.25	0.305	0.642	-0.12	0.163	-4.77e-09	0.175	-0.163
10233	B7 || B7 gene (2)	0.425	0.985	-0.555	-0.425	0.146	-0.127	0.346	-0.28	0.127	-1.72	-0.79
10236	HNRPR || heterogeneous nuclear ribonucleoprotein R (2)	-0.005	0.005	-0.025	0.825	0.1	0.647	0.57	1.09	0.76	-0.62	-0.215
10237	SLC35B1 || solute carrier family 35, member B1 (2)	-0.01	0.01	0.3	-0.145	-0.292	5.84e-08	0.158	0.292	-0.322	0.138	-0.292
10238	WDR68 || WD repeat domain 68 (1)	-0.005	0.005	0.195	-0.245	-0.67	-0.343	0.01	-0.25	4.53e-08	3.16e-08	0.25
1024	CDK8 || cyclin-dependent kinase 8 (2)	-1.02	-0.328	0.328	0.797	0.05	0.207	-0.315	-0.336	1.19e-08	-0.12	-0.0155
10240	MRPS31 || mitochondrial ribosomal protein S31 (4)	-0.631	-0.231	0.816	0.231	0.482	0.554	-1.38	0.528	0.218	0.028	-0.269
10243	GPHN || gephyrin (1)	-4.47e-10	0.16	-0.07	0	-0.037	2.98e-09	-0.817	0.197	-0.317	0.053	-0.483
10244	RAB9P40 || Rab9 effector p40 (2)	0.152	0.278	-0.158	-0.152	-0.14	0.277	0.08	-0.435	1.01	1.06	0.879
10247	HRSP12 || heat-responsive protein 12 (1)	-0.085	0.085	-0.615	0.575	0.59	0.687	-1.44	1.12	0.22	0.04	-0.505
10248	POP7 || processing of precursor 7, ribonuclease P subunit (S. cerevisiae) (1)	-0.26	-5.22e-10	0.02	0	-0.432	0.0554	0.698	-0.005	0.0784	0.258	0.535
10250	SRRM1 || serine/arginine repetitive matrix 1 (4)	0.015	0.005	-0.005	-0.095	5.81e-08	0.517	-0.37	0.382	0.132	0.05	-0.21
10252	SPRY1 || sprouty homolog 1, antagonist of FGF signaling (Drosophila) (2)	0.175	0.015	-0.305	-0.015	-0.135	-0.063	-0.29	-0.48	1.19e-08	-0.23	0.0595
10253	SPRY2 || sprouty homolog 2 (Drosophila) (1)	-0.13	-0.18	0.13	0.57	-0.0085	0.0085	-1.07	0.19	-0.319	-0.0085	-0.19
10254	STAM2 || signal transducing adaptor molecule (SH3 domain and ITAM motif) 2 (1)	0.03	-0.04	-0.03	0.51	-0.0358	-0.439	-0.466	-0.073	0.0442	-0.166	-0.303
10257	ABCC4 || ATP-binding cassette, sub-family C (CFTR/MRP), member 4 (1)	-0.135	-0.565	0.135	0.765	0.663	-4.77e-09	0.183	-0.43	0.083	-0.057	0.43
1026	CDKN1A || cyclin-dependent kinase inhibitor 1A (p21, Cip1) (1)	-0.1	0.09	0.18	-0.09	-0.4	0.017	-2.38e-09	-0.348	-0.02	0.2	0.362
10263	CDK2AP2 || CDK2-associated protein 2 (2)	0.48	-0.18	-0.01	0.01	-0.66	0.337	-0.64	-0.455	-0.675	-0.08	0.455
10269	ZMPSTE24 || zinc metallopeptidase (STE24 homolog, yeast) (1)	-0.07	-0.16	0.07	0.1	-2.77e-08	0.247	-0.74	0.625	-0.26	0.08	-0.625
1027	CDKN1B || cyclin-dependent kinase inhibitor 1B (p27, Kip1) (1)	-0.005	-0.005	0.005	0.065	0.61	0.097	-0.64	-9.18e-08	0.24	-0.12	-0.58
10270	AKAP8 || A kinase (PRKA) anchor protein 8 (1)	0.33	0.04	-0.7	-0.04	0.44	-0.043	-0.21	-0.273	0.25	4.17e-09	0.017
10274	STAG1 || stromal antigen 1 (2)	-0.5	2.16e-09	0.19	0	0.19	0.082	-5.96e-10	0.124	4.17e-09	0.09	-0.0155
10276	NET1 || neuroepithelial cell transforming gene 1 (1)	-0.105	-0.185	0.105	0.635	0.043	-1.31e-08	-0.787	-0.01	0.213	0.273	0.13
10277	UBE4B || ubiquitination factor E4B (UFD2 homolog, yeast) (2)	-0.295	-0.095	0.095	0.32	-0.085	0.042	1.43e-08	-0.12	0.128	-2	0.12
10280	OPRS1 || opioid receptor, sigma 1 (2)	-0.15	0.15	0.8	-0.56	-1.29	-0.698	-2.38e-09	-0.885	-1.72	-0.64	0.085
10282	BET1 || BET1 homolog (S. cerevisiae) (1)	-0.065	-0.175	0.065	0.105	0.23	0.207	0	-0.275	0.1	1.12	0.37
10283	SDCCAG10 || serologically defined colon cancer antigen 10 (1)	0.37	4.83e-08	-0.24	0	0.29	0.217	-1.75	0.36	0.06	-2.56e-08	0.65
10284	SAP18 || sin3-associated polypeptide, 18kDa (1)	0.025	-0.025	0.215	-0.295	0.58	-0.333	-0.47	0.383	-0.06	0.69	-0.383
10286	BCAS2 || breast carcinoma amplified sequence 2 (2)	-0.453	-0.347	0.438	0.347	0.83	0.762	-0.82	0.635	0.54	0.475	-0.155
10287	RGS19 || regulator of G-protein signalling 19 (1)	0.255	0.355	-0.255	-0.805	-0.71	-0.723	0.96	0.095	0.11	-0.28	-0.095
10289	GC20 || translation factor sui1 homolog (1)	0.05	-0.05	-0.11	0.18	-0.22	0.167	-0.64	-0.05	0.12	0.27	4.08e-08
1029	CDKN2A || cyclin-dependent kinase inhibitor 2A (melanoma, p16, inhibits CDK4) (2)	-0.025	0.16	0.025	-0.695	-0.69	-0.073	0.89	-0.508	-0.3	-0.225	-0.449
10291	SF3A1 || splicing factor 3a, subunit 1, 120kDa (1)	0.425	0.405	-0.835	-0.405	-0.37	-0.253	0.08	-0.17	-1.19e-09	-0.26	0.17
10293	TRIP || TRAF interacting protein (1)	0.235	0.225	-0.225	-0.395	-8.64e-09	-0.193	0.55	-0.748	-0.26	-0.31	-0.298
10294	DNAJA2 || DnaJ (Hsp40) homolog, subfamily A, member 2 (2)	-0.185	-0.965	0.2	0.185	0.23	0.482	-1.49e-10	0.75	0.565	0.385	0.33
10295	BCKDK || branched chain ketoacid dehydrogenase kinase (2)	0.0425	-0.0425	0.422	-0.497	-1.03	-0.683	0.04	-0.385	-0.64	-0.745	-0.145
10298	PAK4 || p21(CDKN1A)-activated kinase 4 (2)	-0.095	0.095	0.155	-0.655	-0.365	-0.933	0.585	-0.275	-0.46	-0.625	0.005
103	ADAR || adenosine deaminase, RNA-specific (1)	-0.095	-0.325	0.095	0.555	2.09e-09	0.187	0.29	-0.363	1.52	1.6	1.15
1030	CDKN2B || cyclin-dependent kinase inhibitor 2B (p15, inhibits CDK4) (2)	-0.147	-0.113	0.113	0.233	0.55	0.167	-0.222	-0.407	-0.22	-0.315	-0.163
10301	DLEU1 || deleted in lymphocytic leukemia, 1 (1)	0.445	0.235	-0.235	-0.555	-0.347	-2.38e-09	-0.317	0.175	0.203	0.123	-0.175
10302	SNAPC5 || small nuclear RNA activating complex, polypeptide 5, 19kDa (2)	-0.03	0.63	-1.19	0.03	0.323	4.41e-08	-0.327	-0.478	0.343	-0.357	0.062
10307	APBB3 || amyloid beta (A4) precursor protein-binding, family B, member 3 (1)	0.12	0.33	-0.12	-0.24	0.13	-0.403	0.7	-0.248	0.17	-1.25	0.352
10308	ZNF267 || zinc finger protein 267 (1)	-0.33	-0.14	0.14	0.71	0.154	0.461	-1.87	0.735	-0.286	0.174	-0.205
1031	CDKN2C || cyclin-dependent kinase inhibitor 2C (p18, inhibits CDK4) (1)	0.095	0.135	-0.095	-0.365	0.189	0.526	-0.361	-0.273	-0.556	0.379	-0.213
10311	DSCR3 || Down syndrome critical region gene 3 (2)	-0.165	-0.325	0.555	0.165	-0.245	0.317	-0.265	-0.21	0	-0.155	0.279
10314	LANCL1 || LanC lantibiotic synthetase component C-like 1 (bacterial) (2)	-0.075	0.075	-0.22	0.29	-0.195	0.877	0.14	0.107	0.1	-0.24	-0.107
10322	SMYD5 || SMYD family member 5 (1)	-0.005	0.085	-0.425	0.005	-0.2	-0.353	0.09	-0.235	0.47	0.05	0.235
10327	AKR1A1 || aldo-keto reductase family 1, member A1 (aldehyde reductase) (1)	0.525	0.205	-0.205	-0.405	-0.16	-0.493	-0.01	-0.653	-5.96e-09	-0.33	-0.383
10328	NOC4 || neighbor of COX4 (2)	0.115	0.005	-0.005	-0.365	-0.23	-0.003	0.85	-0.033	0.01	-0.23	0.037
1033	CDKN3 || cyclin-dependent kinase inhibitor 3 (CDK2-associated dual specificity phosphatase) (3)	-0.365	-0.145	0.145	0.209	-0.07	0.657	-0.217	0.395	-2.38e-09	0.063	-0.395
10330	TMEM4 || transmembrane protein 4 (1)	0.49	0.59	-0.49	-0.67	-0.07	0.017	-0.03	0.217	0.31	0.01	-0.423
10342	TFG || TRK-fused gene (2)	-0.855	-0.115	0.235	0.115	0.075	0.567	-1.59	0.22	-0.39	5.96e-10	-0.29
10352	WARS2 || tryptophanyl tRNA synthetase 2 (mitochondrial) (1)	-0.235	-0.625	0.305	0.235	-5.07e-09	-0.053	-0.27	0.382	0.68	0.4	-0.208
1036	CDO1 || cysteine dioxygenase, type I (1)	-0.345	-0.015	0.395	0.015	-0.115	-0.178	-0.535	-0.475	-0.46	0.115	-0.326
10360	NPM3 || nucleophosmin/nucleoplasmin, 3 (1)	-0.02	0.37	0.02	-0.37	-0.19	-0.203	-9.54e-09	-0.935	0.38	0.43	0.665
10363	HMG20A || high-mobility group 20A (1)	0.07	-0.07	-0.52	0.14	-0.04	0.237	1.79e-09	0.835	-0.07	0.37	-0.275
10365	KLF2 || Kruppel-like factor 2 (lung) (1)	-0.14	-0.21	0.62	0.14	0.085	-0.608	-0.975	-0.145	-1.76	0.185	0.145
10367	CBARA1 || calcium binding atopy-related autoantigen 1 (2)	-0.412	-0.0475	0.0575	0.0475	0.17	0.107	-0.535	0.519	0.135	0.14	-0.77
10370	CITED2 || Cbp/p300-interacting transactivator, with Glu/Asp-rich carboxy-terminal domain, 2 (1)	-0.155	0.155	-0.175	0.215	-0.681	-0.474	-1.03	0.377	0.469	0.889	1.22
10380	BPNT1 || 3'(2'), 5'-bisphosphate nucleotidase 1 (3)	-0.1	0.1	-0.14	1.3	-0.028	0.565	0.122	0.599	-2.38e-09	0.465	0.538
10383	TUBB2 || tubulin, beta, 2 (2)	0.05	0.275	-0.05	-0.55	-0.835	-0.083	0.305	-0.065	-0.3	-4.77e-09	-0.35
10385	BTN2A2 || butyrophilin, subfamily 2, member A2 (3)	0.555	0.56	-0.555	-0.815	0.213	4.77e-09	-0.354	-0.21	0.36	-0.047	0.21
10389	SCML2 || sex comb on midleg-like 2 (Drosophila) (1)	-0.175	-0.305	0.175	0.865	-7.45e-09	0.517	-0.27	0.385	-0.22	0.01	-0.385
1039	CDR2 || cerebellar degeneration-related protein 2, 62kDa (2)	-0.0475	0.198	-0.343	0.0475	0.178	0.295	-0.272	-0.386	-0.0316	-0.502	0.17
10390	CEPT1 || choline/ethanolamine phosphotransferase 1 (1)	0.1	-0.02	0.02	-0.39	-0.087	-1.07e-08	0.043	1	0.363	0.233	-0.055
103910	MRLC2 || myosin regulatory light chain MRLC2 (3)	-0.243	-0.373	0.243	0.252	-0.36	0.66	-0.31	-0.113	-6.44e-09	0.51	0.113
10393	ANAPC10 || anaphase promoting complex subunit 10 (1)	-0.055	-0.085	0.235	0.055	1.28e-08	0.287	-0.62	0.83	-0.52	0.12	-0.48
104	ADARB1 || adenosine deaminase, RNA-specific, B1 (RED1 homolog rat) (1)	0.22	-0.13	0.13	-0.34	0.32	0.527	0.65	-0.253	0.54	-1.33	0.253
10400	PEMT || phosphatidylethanolamine N-methyltransferase (2)	0.025	-0.025	0.125	-0.545	-1.22	-0.713	-0.07	-1.23	-3.58e-08	0.57	0.132
10410	IFITM3 || interferon induced transmembrane protein 3 (1-8U) (1)	0.445	0.305	-0.335	-0.305	-1.03	-0.393	-0.09	-0.62	0.29	-1.37e-08	-2.09e-09
10412	TINP1 || TGF beta-inducible nuclear protein 1 (2)	0.125	-0.125	-0.915	0.145	0.51	0.232	-1.64	-0.295	0.11	0.195	0.295
10413	YAP1 || Yes-associated protein 1, 65kDa (2)	-0.135	-0.405	0.135	0.655	0.1	0.207	-0.05	0.23	0.21	-0.2	-0.23
10419	SKB1 || SKB1 homolog (S. pombe) (2)	-0.583	-1.13	0.583	0.598	-1.03	0.097	-0.125	-0.373	-0.99	0.01	-0.233
10421	CD2BP2 || CD2 antigen (cytoplasmic tail) binding protein 2 (3)	0.152	0.298	-0.152	-1.08	-0.3	0.587	1.23	0.0535	-2.38e-08	-0.19	-0.546
10422	UBADC1 || ubiquitin associated domain containing 1 (1)	-0.22	0.46	0.22	-0.6	-0.457	-3.22e-08	0.643	-0.125	-0.127	-2.02	0.125
10423	CDIPT || CDP-diacylglycerol--inositol 3-phosphatidyltransferase (phosphatidylinositol synthase) (3)	0.137	0.117	-0.117	-0.536	-0.272	-1.79e-09	1.36	-0.139	0.118	-0.277	0.141
10426	TUBGCP3 || tubulin, gamma complex associated protein 3 (1)	0.085	-0.085	-0.635	1.03	0.423	1.31e-08	0.253	-0.075	0.053	-0.657	0.075
10428	CFDP1 || craniofacial development protein 1 (1)	0.15	2.93e-08	-0.55	0	0.65	0.667	-0.34	0.347	0.4	-0.36	-0.033
10432	RBM14 || RNA binding motif protein 14 (1)	0.26	0.37	-0.26	-0.36	0.14	-0.433	-0.06	-0.195	0.22	-8.94e-09	0.195
10434	LYPLA1 || lysophospholipase I (3)	-0.502	-0.234	0.234	0.676	-0.138	0.465	0.005	1.08	-0.325	0.175	-0.84
10435	CDC42EP2 || CDC42 effector protein (Rho GTPase binding) 2 (1)	0.19	0.25	-0.19	-0.62	-2.77e-08	-0.293	0.97	-1.15	-0.2	-0.06	0.2
10436	C2F || C2f protein (1)	0.09	-0.09	-0.46	0.18	0.12	0.247	1.91e-08	0.187	0.47	0.46	0.297
10437	IFI30 || interferon, gamma-inducible protein 30 (2)	0.278	0.138	-0.138	-0.623	-0.44	0.062	-0.145	-0.045	0.13	5.36e-09	0.045
10438	C1D || nuclear DNA-binding protein (2)	-0.155	0.015	-0.015	0.405	0.389	0.796	-0.286	1.69	0.264	1.01	0.175
10445	MCRS1 || microspherule protein 1 (1)	1.94e-09	0.16	-0.08	0	-0.61	-0.433	0.78	-0.32	1.04e-09	-0.05	0.32
10447	FAM3C || family with sequence similarity 3, member C (3)	-0.13	-4.1e-09	-3.28e-09	1.48	1.03	0.957	-0.337	0.133	0.81	0.777	-0.133
10449	ACAA2 || acetyl-Coenzyme A acyltransferase 2 (mitochondrial 3-oxoacyl-Coenzyme A thiolase) (4)	-0.586	-0.269	0.349	0.269	-0.0925	0.814	-0.528	-0.192	-3.58e-09	-0.367	-0.154
1045	CDX2 || caudal type homeo box transcription factor 2 (2)	0.412	0.858	-0.412	-0.593	-0.287	8.34e-09	0.903	-0.998	0.343	-0.297	0.642
10450	PPIE || peptidylprolyl isomerase E (cyclophilin E) (3)	0.13	0.166	-0.13	-1.01	-0.328	0.241	0.07	0.035	0.077	-0.063	-0.035
10452	TOMM40 || translocase of outer mitochondrial membrane 40 homolog (yeast) (2)	-0.135	0.135	0.165	-1.06	-0.225	-0.213	1.03	-0.295	0.365	4.17e-09	0.295
10454	MAP3K7IP1 || mitogen-activated protein kinase kinase kinase 7 interacting protein 1 (2)	0.67	0.59	-1.14	-0.59	1.86e-10	-0.823	0.225	0.061	-0.24	-0.38	-0.061
10455	PECI || peroxisomal D3,D2-enoyl-CoA isomerase (1)	-0.15	-0.13	0.69	0.13	-0.01	0.177	-0.64	0.0275	0.16	1.79e-09	-0.0275
10456	HAX1 || HCLS1 associated protein X-1 (2)	0.32	0.1	-0.1	-0.13	-0.75	-0.038	0.565	-0.242	-0.25	-6.56e-09	-0.0825
10460	TACC3 || transforming, acidic coiled-coil containing protein 3 (1)	0.19	0.6	-0.19	-0.27	-0.237	-3.22e-08	0.343	-0.58	0.053	-0.107	0.58
10461	MERTK || c-mer proto-oncogene tyrosine kinase (1)	-5.21e-09	-0.43	0.29	0	-0.17	0.177	0.05	-0.396	-0.05	-0.28	0.394
10463	SLC30A9 || solute carrier family 30 (zinc transporter), member 9 (2)	-0.555	-0.415	0.415	0.63	0.52	0.237	-0.39	0.81	0.32	0.05	-0.27
10465	PPIH || peptidyl prolyl isomerase H (cyclophilin H) (2)	0.207	0.0975	-0.0975	-0.367	0.39	0.072	-0.725	0.04	0.23	0.385	0.23
10466	COG5 || component of oligomeric golgi complex 5 (1)	-0.08	-0.09	0.08	0.23	0.28	0.237	-0.11	0.575	0.06	-0.64	-0.275
10467	ZNHIT1 || zinc finger, HIT domain containing 1 (2)	0.407	0.172	-0.172	-0.713	-0.532	0	0.028	-0.02	0.158	0.078	0.02
10469	TIMM44 || translocase of inner mitochondrial membrane 44 homolog (yeast) (2)	0.225	0.675	-0.225	-0.46	-0.075	-0.063	0.605	-0.035	-1.49e-10	0.015	0.035
10471	HKE2 || HLA class II region expressed gene KE2 (1)	0.15	2.93e-08	-1.24	0	0.45	0.717	0.11	-0.073	0.76	6.02e-08	0.677
10472	ZNF238 || zinc finger protein 238 (1)	0.16	-0.07	0.07	-0.46	0.49	0.067	0.36	0.02	2.62e-08	0.29	1.69
10474	TADA3L || transcriptional adaptor 3 (NGG1 homolog, yeast)-like (1)	0.265	0.795	-0.265	-0.635	-0.367	-1.31e-08	1.3	-0.0175	-0.037	-1.18	0.0175
10477	UBE2E3 || ubiquitin-conjugating enzyme E2E 3 (UBC4/5 homolog, yeast) (2)	-0.0675	0.0325	0.233	-0.0325	0.158	-2.27e-08	-0.244	-0.275	-0.439	0.268	-0.07
10479	SLC9A6 || solute carrier family 9 (sodium/hydrogen exchanger), isoform 6 (1)	-0.135	-0.295	0.255	0.135	0.348	-0.265	-1.02	-0.438	-0.977	-0.412	-0.523
10480	GA17 || dendritic cell protein (2)	-0.292	-0.0525	0.482	0.0525	0.135	0.612	-0.8	0.475	-0.02	0.375	-0.445
10481	HOXB13 || homeo box B13 (1)	-0.06	0.06	0.39	-0.87	-0.52	-0.623	0.91	-0.313	4.1e-10	-4.81	-0.043
10482	NXF1 || nuclear RNA export factor 1 (1)	0.02	-0.06	0.02	-0.02	-0.427	-5.96e-09	-0.467	-0.558	-0.037	0.103	-0.718
10483	SEC23B || Sec23 homolog B (S. cerevisiae) (2)	-0.57	-0.1	0.1	0.505	0.185	0.612	-0.22	0.353	0.795	0.965	-0.353
10484	SEC23A || Sec23 homolog A (S. cerevisiae) (1)	-0.37	-0.5	0.37	0.38	9.24e-09	0.077	-0.54	0.977	-0.5	0.09	-0.203
10486	CAP2 || CAP, adenylate cyclase-associated protein, 2 (yeast) (2)	-0.415	-0.02	0.02	0.46	0.15	0.057	5.96e-08	0.59	0.06	-0.21	-0.48
10487	CAP1 || CAP, adenylate cyclase-associated protein 1 (yeast) (1)	-0.035	0.065	-0.335	0.035	2.68e-09	-0.038	-0.89	0.122	0.435	0.965	1.57
10488	CREB3 || cAMP responsive element binding protein 3 (2)	0.0125	-0.0125	-0.0675	0.253	-0.19	0.147	0.315	-0.085	-7.15e-09	-0.14	0.085
10489	LRRC41 || leucine rich repeat containing 41 (1)	0.045	-0.045	0.235	-0.455	-0.54	-0.483	0.29	-0.11	-0.01	-0.21	0.11
10490	VTI1B || vesicle transport through interaction with t-SNAREs homolog 1B (yeast) (2)	0.845	0.215	-2.35	-0.215	2.95e-08	0.367	-0.24	0.323	-0.265	-1.15	-0.247
10492	SYNCRIP || synaptotagmin binding, cytoplasmic RNA interacting protein (2)	-0.05	0.05	-0.52	0.06	0.485	0.172	-0.775	0.507	5.48e-08	-0.175	-0.643
10494	STK25 || serine/threonine kinase 25 (STE20 homolog, yeast) (3)	-0.155	-0.275	0.225	0.155	-0.577	-3.58e-09	1.42	0.165	-0.24	-0.097	-0.165
10497	UNC13B || unc-13 homolog B (C. elegans) (1)	0.125	-0.125	-0.625	0.185	0.555	0.132	0.335	0.315	-0.235	-0.595	0.035
10498	CARM1 || coactivator-associated arginine methyltransferase 1 (2)	0.035	0.345	-0.035	-0.865	-0.0708	-0.169	0.494	-0.33	0.354	0.0242	0.33
1050	CEBPA || CCAAT/enhancer binding protein (C/EBP), alpha (1)	0.065	0.115	-0.065	-0.535	-0.97	-0.733	-5.01e-08	-0.428	-0.57	-0.42	-0.648
10505	SEMA4F || sema domain, immunoglobulin domain (Ig), transmembrane domain (TM) and short cytoplasmic domain, (semaphorin) 4F (1)	1.94e-09	-0.17	0.38	0	-0.19	-0.393	0.16	-1.36	-0.05	-2.32e-08	0.695
1051	CEBPB || CCAAT/enhancer binding protein (C/EBP), beta (1)	0.285	0.265	-0.265	-1.02	0.065	-0.288	0.595	0.272	-0.475	-0.065	-0.038
10512	SEMA3C || sema domain, immunoglobulin domain (Ig), short basic domain, secreted, (semaphorin) 3C (1)	-0.04	0.04	-0.42	0.37	0.681	0.0885	-0.0885	0.845	0.172	0.102	0.045
10513	APPBP2 || amyloid beta precursor protein (cytoplasmic tail) binding protein 2 (1)	0.04	-1.84e-08	-0.46	0	3.28e-09	0.447	-1.06	1.19	-0.33	-0.03	-0.345
10514	MYBBP1A || MYB binding protein (P160) 1a (1)	0.465	0.385	-0.385	-1.25	0.638	-0.455	0.988	0.582	-0.242	-0.572	-0.183
10518	CIB2 || calcium and integrin binding family member 2 (1)	0.105	0.355	-0.105	-0.455	-0.152	-0.165	1.12	-0.298	0.408	-2	0.382
10520	ZNF211 || zinc finger protein 211 (1)	-0.535	-0.605	0.535	0.875	-0.1	0.397	0.2	-0.023	-0.14	-0.26	-0.463
10521	DDX17 || DEAD (Asp-Glu-Ala-Asp) box polypeptide 17 (10)	-0.085	0.085	-1.33	0.515	0.128	-0.0646	0.949	0.09	1.04	1.52	-0.04
10523	CHERP || calcium homeostasis endoplasmic reticulum protein (2)	0.268	0.458	-0.383	-0.268	0.328	-0.575	-0.0466	-0.383	-0.472	-0.352	-0.133
10524	HTATIP || HIV-1 Tat interacting protein, 60kDa (1)	0.22	2.45e-08	-0.06	0	-0.352	-0.275	0.678	-0.015	0.108	-2.8	0.015
10525	HYOU1 || hypoxia up-regulated 1 (1)	0.575	0.415	-0.415	-0.485	-0.62	-0.583	0.01	0.152	0.1	0.24	-0.118
10526	IPO8 || importin 8 (2)	0.025	-0.025	-0.075	1.2	-0.28	0.097	-0.09	-0.133	-0.24	0.28	-0.033
10528	NOL5A || nucleolar protein 5A (56kDa with KKE/D repeat) (3)	0.21	0.26	-0.21	-1.08	0.26	0.237	0.1	-0.293	0.02	-0.22	0.047
10531	PITRM1 || pitrilysin metalloproteinase 1 (2)	0.02	-0.05	-0.02	0.39	0.168	-2.38e-09	-0.727	-0.105	0.033	-0.177	0.045
10533	APG7L || APG7 autophagy 7-like (S. cerevisiae) (2)	0.285	0.145	-0.145	-0.2	-0.1	-0.218	0.045	-0.285	0.235	0.12	-0.065
10536	LEPREL2 || leprecan-like 2 (1)	0.09	1.15	-0.09	-1.63	-0.251	-0.214	0.789	0.07	0.209	0.299	-0.07
10539	TXNL2 || thioredoxin-like 2 (2)	-0.47	-0.425	0.455	0.425	0.25	0.277	-0.017	0.744	0.38	0.89	-0.432
1054	CEBPG || CCAAT/enhancer binding protein (C/EBP), gamma (3)	-0.02	0.02	-0.23	0.305	0.386	0.493	-0.527	0.495	0.34	0.163	-0.095
10541	ANP32B || acidic (leucine-rich) nuclear phosphoprotein 32 family, member B (2)	-0.725	0.915	0.015	-0.015	0.65	0.657	-0.89	0.16	0.32	-9.24e-08	-0.16
10542	HBXIP || hepatitis B virus x interacting protein (2)	0.343	0.297	-0.482	-0.297	0.84	0.712	-7.15e-09	0.115	0.78	1	0.02
10544	PROCR || protein C receptor, endothelial (EPCR) (1)	-0.02	0.06	0.02	-0.36	-0.28	0.577	0.04	-0.158	4.1e-10	-0.77	0.062
10548	TM9SF1 || transmembrane 9 superfamily member 1 (1)	-2.43e-08	-0.09	0.11	0	-0.32	-0.163	-2.15e-08	0.165	-1.67e-08	0.1	-0.165
10549	PRDX4 || peroxiredoxin 4 (1)	0.025	0.355	-0.025	-0.335	-0.169	0.169	-0.719	-0.285	0.622	1.38	0.285
10550	ARL6IP5 || ADP-ribosylation-like factor 6 interacting protein 5 (3)	-0.558	-0.211	0.211	0.288	0.167	0.484	-0.627	0.974	-5.96e-10	0.007	-0.601
10552	ARPC1A || actin related protein 2/3 complex, subunit 1A, 41kDa (5)	-0.342	-0.116	0.366	0.116	9.24e-09	0.711	-0.634	-0.015	0.42	0.553	0.015
10553	HTATIP2 || HIV-1 Tat interactive protein 2, 30kDa (1)	0.015	-0.015	0.165	-0.085	-0.12	0.207	-0.74	-0.133	4.47e-10	-0.17	-0.153
10554	AGPAT1 || 1-acylglycerol-3-phosphate O-acyltransferase 1 (lysophosphatidic acid acyltransferase, alpha) (2)	0.16	0.86	-0.16	-0.5	-0.167	-0.3	1.31e-09	-0.368	6.08e-09	0.113	0.368
10555	AGPAT2 || 1-acylglycerol-3-phosphate O-acyltransferase 2 (lysophosphatidic acid acyltransferase, beta) (2)	-0.235	0.235	0.62	-0.705	-0.17	-0.088	1.81	-0.025	0.135	-1.19e-09	0.025
10556	RPP30 || ribonuclease P/MRP 30kDa subunit (1)	-0.02	0.34	-0.03	0.02	0.47	0.487	-0.68	0.682	0.25	0.32	-0.403
10558	SPTLC1 || serine palmitoyltransferase, long chain base subunit 1 (11)	-0.898	-0.314	0.314	0.781	-0.128	0.747	-0.265	0.377	-1.43e-08	0.495	-0.377
10559	SLC35A1 || solute carrier family 35 (CMP-sialic acid transporter), member A1 (3)	-0.319	-0.121	0.121	0.474	0.617	0.844	0.063	-0.101	-0.255	6.56e-09	0.101
10560	SLC19A2 || solute carrier family 19 (thiamine transporter), member 2 (2)	-0.667	-0.228	0.228	0.468	8.94e-10	0.372	-0.2	0.223	0.22	-6.56e-09	-0.223
10566	AKAP3 || A kinase (PRKA) anchor protein 3 (1)	0.075	-0.075	-0.475	0.415	5.96e-10	-0.233	0.55	0.11	0.28	-1.47	-0.11
10567	RABAC1 || Rab acceptor 1 (prenylated) (2)	0.24	0.08	-0.08	-0.635	-0.312	2.98e-08	0.428	-0.308	0.198	0.318	0.412
10571	SMA3 || SMA3 (1)	0.035	-0.035	0.235	-0.405	0.168	0.575	0.698	0.667	0.438	-0.152	0.257
10572	SIVA || CD27-binding (Siva) protein (2)	0.135	0.035	-0.035	-0.815	-0.625	-0.078	0.18	-0.0275	-0.7	5.96e-10	-0.335
10573	MRPL28 || mitochondrial ribosomal protein L28 (1)	0.205	0.415	-0.205	-0.945	-0.07	-0.033	0.97	-0.05	0.29	3.64e-08	0.05
1058	CENPA || centromere protein A, 17kDa (1)	-0.31	-0.24	0.33	0.24	-0.24	0.437	0.59	-0.055	-2.62e-08	-0.05	-0.565
10581	IFITM2 || interferon induced transmembrane protein 2 (1-8D) (2)	0.163	0.0275	-0.0275	-0.573	-1.39	-0.563	-0.515	-0.548	-3.58e-08	0.105	-0.178
10585	POMT1 || protein-O-mannosyltransferase 1 (2)	0.917	0.0175	-0.0175	-0.0825	0.01	-1.05	0.222	-0.365	-0.405	-4.77e-09	0.432
10587	TXNRD2 || thioredoxin reductase 2 (1)	0.5	-0.03	0.03	-1.04	0.01	-0.073	1.54	-0.585	-0.01	0.19	0.585
10588	MTHFS || 5,10-methenyltetrahydrofolate synthetase (5-formyltetrahydrofolate cyclo-ligase) (1)	-0.015	0.015	0.095	-0.475	0.38	-0.068	-0.2	-0.0075	-0.38	-0.48	0.0075
10591	C6orf108 || chromosome 6 open reading frame 108 (1)	0.15	9.01e-09	-0.33	0	-0.408	-0.0315	0.842	-0.825	-0.129	0.0315	0.31
10594	PRPF8 || PRP8 pre-mRNA processing factor 8 homolog (yeast) (1)	0.25	-0.2	-0.25	0.2	0.28	-0.033	0.45	-0.418	-0.46	0.07	0.842
1060	CENPC1 || centromere protein C 1 (2)	-0.0625	0.0625	0.158	-0.0625	0.688	1.79e-09	-0.197	-0.113	0.108	-0.107	-0.662
10600	USP16 || ubiquitin specific protease 16 (1)	-0.1	0.1	-0.69	0.91	0.649	0.496	-1.98	0.485	-0.561	-0.331	-0.025
10605	PAIP1 || poly(A) binding protein interacting protein 1 (2)	0.06	-0.28	-0.06	0.565	-0.098	0.069	-1.91e-09	0.255	-0.23	-1.03	-0.182
10607	TBL3 || transducin (beta)-like 3 (1)	0.045	0.295	-0.045	-0.815	-0.29	-0.463	1.85	-0.475	2.38e-09	-0.41	0.475
10609	SC65 || synaptonemal complex protein SC65 (1)	0.29	0.24	-0.24	-0.48	-0.01	-0.443	0.15	0.267	0.02	0.2	0.197
10611	PDLIM5 || PDZ and LIM domain 5 (2)	0.005	0.245	-0.425	-0.005	0.153	-1.79e-08	-0.537	-0.165	0.4	-0.547	0.0105
10613	SPFH1 || SPFH domain family, member 1 (1)	-0.09	-0.25	0.11	0.09	-0.237	-2.74e-08	-0.117	0.38	0.283	0.163	-0.38
10614	HIS1 || HMBA-inducible (2)	0.08	-0.08	0.41	-0.25	0.545	-0.273	2.62e-08	-0.435	-0.19	-0.17	-0.185
10615	SPAG5 || sperm associated antigen 5 (1)	-0.04	0.04	-0.31	0.07	-0.06	0.777	7.15e-09	0.225	0.39	0.36	-0.225
10616	C20orf18 || chromosome 20 open reading frame 18 (1)	-0.3	0.11	-1.19e-09	0	-0.32	-0.083	0.45	0.17	-0.05	-0.86	-0.17
10617	STAMBP || STAM binding protein (1)	-0.24	-0.15	0.23	0.15	0.123	2.74e-08	-0.292	0.145	-0.052	-0.657	-0.145
10618	TGOLN2 || trans-golgi network protein 2 (1)	-1.04e-09	-0.28	0.17	0	0.063	6.56e-09	-0.397	-0.196	-0.402	0.323	-0.0105
1062	CENPE || centromere protein E, 312kDa (1)	0.33	0.36	-0.5	-0.33	0.695	0.462	0.295	0.19	-0.015	-0.295	-0.19
10623	POLR3C || polymerase (RNA) III (DNA directed) polypeptide C (62kD) (1)	-0.055	-0.005	0.485	0.005	0.49	0.307	-0.64	-0.123	0.61	0.22	0.177
10625	IVNS1ABP || influenza virus NS1A binding protein (2)	0.0825	-0.0825	-0.388	1.09	0.113	1.43e-08	-0.837	0.0495	-0.302	-0.192	-0.535
10626	TRIM16 || tripartite motif-containing 16 (1)	-0.01	0.49	0.01	-0.16	-0.05	-0.263	0.13	0.037	0.26	-0.01	-0.743
10627	MRCL3 || myosin regulatory light chain MRCL3 (1)	-0.04	-0.13	0.28	0.04	-8.94e-10	0.297	-0.22	-0.04	0.47	0.54	-3.07e-08
10628	TXNIP || thioredoxin interacting protein (1)	-0.235	-0.285	0.235	0.255	2.95e-08	0.037	-0.4	-0.258	-0.13	2.2e-08	-0.148
10629	TAF6L || TAF6-like RNA polymerase II, p300/CBP-associated factor (PCAF)-associated factor, 65kDa (1)	0.115	0.215	-0.115	-1.65	-0.86	-0.433	1.1	0.145	2.27e-08	8.94e-09	-0.145
10632	ATP5L || ATP synthase, H+ transporting, mitochondrial F0 complex, subunit g (3)	0.333	0.237	-0.237	-0.247	0.704	0.964	-0.05	0.183	1.23	1.62	0.369
10635	RAD51AP1 || RAD51 associated protein 1 (4)	-0.0799	0.0799	-0.407	0.608	-2.34e-08	0.282	-0.732	0.356	-0.047	0.111	-0.356
10642	IMP-1 || IGF-II mRNA-binding protein 1 (3)	0.099	0.005	-0.005	-0.318	-0.275	0.019	0.342	0.3	0.105	-0.535	-0.3
10643	IMP-3 || IGF-II mRNA-binding protein 3 (2)	0.0225	0.113	-0.253	-0.0225	0.105	-0.158	-7.15e-09	-1.34e-09	0.255	0.365	-0.06
10644	IMP-2 || IGF-II mRNA-binding protein 2 (2)	0.155	0.355	-0.29	-0.155	0.48	0.017	-0.565	0.647	0.205	-0.29	-0.138
10650	C18orf43 || chromosome 18 open reading frame 43 (1)	0.11	0.02	-0.02	-0.49	1.76e-08	-0.563	0.09	-1.01	-0.19	-0.96	0.182
10651	MTX2 || metaxin 2 (1)	0.04	-1.12e-09	-0.03	0	0.13	0.347	2.68e-09	0.88	0.42	0.54	-0.04
10654	PMVK || phosphomevalonate kinase (1)	1.86e-08	0.45	-0.47	0	-0.877	1.55e-08	0.333	-0.32	-0.687	-1.67	0.03
10656	KHDRBS3 || KH domain containing, RNA binding, signal transduction associated 3 (1)	0.05	0.38	-0.41	-0.05	5.33e-08	-0.003	0.04	0.23	0.395	-0.13	-0.295
10657	KHDRBS1 || KH domain containing, RNA binding, signal transduction associated 1 (2)	-0.225	0.225	-0.285	0.695	-1.58e-08	0.307	-1.04	0.875	0.24	0.135	-0.355
10658	CUGBP1 || CUG triplet repeat, RNA binding protein 1 (2)	-0.22	-0.08	0.245	0.08	0.015	0.287	0.1	0.204	-0.015	-0.175	-0.204
10659	CUGBP2 || CUG triplet repeat, RNA binding protein 2 (2)	0.015	-0.39	9.84e-09	0	-0.202	-1.12e-10	-0.097	0.217	0.198	0.383	-0.217
10664	CTCF || CCCTC-binding factor (zinc finger protein) (2)	-0.275	0.035	-0.035	1.44	0.47	0.117	-0.075	-0.215	-0.075	0.11	0.165
10667	FARS2 || phenylalanine-tRNA synthetase 2 (mitochondrial) (1)	0.07	-0.05	0.05	-0.49	0.22	0.197	-0.01	-0.06	2.86e-08	-0.14	-0.57
10668	CGRRF1 || cell growth regulator with ring finger domain 1 (1)	-0.665	-0.235	0.235	0.255	0.16	0.717	4.05e-08	1.09	-0.24	0.81	-0.6
10671	DCTN6 || dynactin 6 (3)	1.46e-09	2.58e-09	-0.094	0.066	0.913	1.02	-0.107	0.562	0.843	0.617	0.255
10672	GNA13 || guanine nucleotide binding protein (G protein), alpha 13 (2)	-0.158	-0.297	0.158	0.583	2.24e-08	-0.358	-0.462	-0.113	-0.228	-0.23	-0.469
10675	CSPG5 || chondroitin sulfate proteoglycan 5 (neuroglycan C) (1)	-0.655	0.265	-0.115	0.115	0.72	-0.033	-0.03	0.225	-0.03	-0.93	0.765
10678	B3GNT1 || UDP-GlcNAc:betaGal beta-1,3-N-acetylglucosaminyltransferase 1 (1)	-0.045	-0.145	0.045	0.255	-3.87e-09	-0.143	-0.46	-0.015	0.2	0.25	0.015
10681	GNB5 || guanine nucleotide binding protein (G protein), beta 5 (2)	-0.04	-0.265	0.04	0.43	0.21	0.217	7.15e-09	0.124	0.715	-0.95	0.0595
10682	EBP || emopamil binding protein (sterol isomerase) (2)	0.22	0.165	-0.165	-0.565	-0.125	0.262	0.365	0.072	8.94e-10	-0.105	-0.188
10683	DLL3 || delta-like 3 (Drosophila) (2)	0.497	0.207	-0.207	-0.482	-0.785	0.162	0.63	0.105	-0.02	0.14	-0.005
10687	PNMA2 || paraneoplastic antigen MA2 (1)	-0.08	0.08	-4.12	1.4	8.94e-10	0.267	-0.25	0.455	0.05	0.37	-0.445
1069	CETN2 || centrin, EF-hand protein, 2 (1)	-0.2	6.71e-10	0.12	0	-0.38	0.077	-0.94	-0.673	0.09	-1.79e-09	0.117
10694	CCT8 || chaperonin containing TCP1, subunit 8 (theta) (2)	-0.412	-0.297	0.652	0.297	0.623	1.28	-0.43	0.634	0.0466	0.843	-0.041
10695	TNRC5 || trinucleotide repeat containing 5 (2)	0.427	0.398	-0.398	-0.777	-0.69	-0.043	0.375	0.095	-0.14	1.97e-08	-0.095
10712	C1orf2 || chromosome 1 open reading frame 2 (1)	0.065	-0.065	0.265	-0.625	-0.15	-0.753	-3.58e-09	-1	-0.62	-0.54	-0.106
10713	USP39 || ubiquitin specific protease 39 (4)	-0.421	-0.234	0.259	0.234	-0.14	0.392	-0.105	0.0375	0.02	0.172	-0.0375
10714	POLD3 || polymerase (DNA-directed), delta 3, accessory subunit (1)	0.02	-0.01	-2.38e-09	0	0.465	0.392	-1.19e-09	0.484	0.305	0.725	0.0745
10715	LASS1 || LAG1 longevity assurance homolog 1 (S. cerevisiae) (2)	0.03	0.01	-0.01	-0.86	-0.215	-0.503	1.13	-0.245	-0.265	-0.755	0.15
10717	AP4B1 || adaptor-related protein complex 4, beta 1 subunit (2)	-0.15	-0.06	0.185	0.06	0.03	0.607	0.21	0.0025	-0.05	-0.125	-0.0025
10721	POLQ || polymerase (DNA directed), theta (1)	-0.195	0.225	-0.245	0.195	0.369	0.386	-0.921	0.87	-0.0308	-1.11	-0.39
10723	SLC12A7 || solute carrier family 12 (potassium/chloride transporters), member 7 (1)	0.23	0.03	-0.03	-0.11	0.74	-0.183	1.14	0.097	0.2	-0.16	-0.273
10724	MGEA5 || meningioma expressed antigen 5 (hyaluronidase) (2)	-0.075	-0.145	0.225	0.075	-0.19	0.222	0.165	0.217	-0.32	5.96e-10	-0.217
10725	NFAT5 || nuclear factor of activated T-cells 5, tonicity-responsive (1)	0.31	-2.91e-09	-0.14	-4.92e-09	-0.122	0.0254	-0.0316	-0.105	0.488	0.278	0.105
10730	YME1L1 || YME1-like 1 (S. cerevisiae) (3)	-0.855	0.295	-0.295	0.49	0.14	0.332	-0.558	-0.003	-0.122	3.58e-09	-0.703
10732	TCFL5 || transcription factor-like 5 (basic helix-loop-helix) (1)	0.11	0.1	-0.1	-0.64	0.311	0.178	0.842	-0.253	-0.178	-0.248	0.757
10733	PLK4 || polo-like kinase 4 (Drosophila) (1)	-0.18	-0.32	0.18	0.46	0.68	0.237	-0.04	-0.2	-1.31e-08	-0.36	0.2
10735	STAG2 || stromal antigen 2 (2)	-0.135	0.135	-0.265	0.89	-1.82e-08	0.342	-0.49	1.01	0.34	0.17	0.11
10736	SIX2 || sine oculis homeobox homolog 2 (Drosophila) (1)	-0.07	0.24	0.07	-0.55	-0.64	-1.24	-1.43e-08	-0.535	-0.34	-1.31	-0.095
10741	RBBP9 || retinoblastoma binding protein 9 (1)	3.13e-09	-0.08	0.23	0	-0.07	-0.063	5.96e-10	0.263	0.63	0.85	-0.263
10743	RAI1 || retinoic acid induced 1 (1)	0.27	0.16	-0.16	-1.19	1.33	-0.243	0.55	-0.038	-0.6	-0.36	0.842
10744	PTTG2 || pituitary tumor-transforming 2 (1)	-0.035	-0.015	0.015	0.235	-0.54	0.217	-0.57	-0.063	-0.16	-0.29	-0.603
10745	PHTF1 || putative homeodomain transcription factor 1 (1)	0.03	0.22	-0.06	-0.03	0.77	0.197	-0.58	-0.655	-0.17	-0.65	0.655
10746	MAP3K2 || mitogen-activated protein kinase kinase kinase 2 (1)	-0.26	-0.14	0.14	1.6	0.656	0.563	-0.674	0.385	0.666	-1.02	-0.385
1075	CTSC || cathepsin C (7)	0.00522	0.0679	-0.00522	-0.136	-0.524	-2.5e-08	-0.686	-0.0818	0.313	0.03	0.0818
10755	RGS19IP1 || regulator of G-protein signalling 19 interacting protein 1 (2)	-0.172	0.507	0.172	-0.897	-0.015	-0.273	1.2	-0.06	-0.26	2.38e-09	0.06
10758	TRAF3IP2 || TRAF3 interacting protein 2 (1)	-0.48	-2.56e-08	0.4	0	-0.4	0.157	-0.05	0.235	-0.97	1.01e-08	-0.251
10761	PLAC1 || placenta-specific 1 (1)	-1.64e-09	-0.02	0.46	0	-0.537	-2.27e-08	0.023	-0.46	-0.157	-0.077	-0.94
10762	NUP50 || nucleoporin 50kDa (2)	-0.28	-0.52	0.28	0.455	0.823	0.918	-0.447	-0.0375	-0.00465	-0.00165	-0.4
10765	JARID1B || Jumonji, AT rich interactive domain 1B (RBP2-like) (1)	0.23	0.05	-0.05	-0.07	0.518	-0.115	0.298	-0.418	-0.422	-0.0117	0.062
10766	TOB2 || transducer of ERBB2, 2 (1)	-0.035	0.035	-0.065	0.185	0.32	-0.093	-0.7	0.062	-0.465	2.92e-08	-0.488
10767	HBS1L || HBS1-like (S. cerevisiae) (1)	-0.04	0.14	0.01	-0.01	0.44	0.127	-1.25	0.21	-0.09	0.19	-0.21
10772	FUSIP1 || FUS interacting protein (serine-arginine rich) 1 (1)	-0.02	0.05	-0.27	0.02	0.53	0.097	-0.5	0.385	-5.96e-10	0.11	-0.135
10775	POP4 || processing of precursor 4, ribonuclease P/MRP subunit (S. cerevisiae) (1)	-0.035	0.095	0.035	-0.065	0.15	0.587	-3.58e-09	0.165	0.41	0.26	-0.165
10776	ARPP-19 || cyclic AMP phosphoprotein, 19 kD (2)	-0.0375	-0.0125	0.0125	0.273	-0.305	-0.068	2.86e-08	-0.833	0.855	0.425	0.717
10778	ZNF271 || zinc finger protein 271 (1)	0.01	-0.22	0.21	-0.01	1.76e-08	0.387	-1	0.74	0.1	1.01e-08	-0.74
10781	ZNF266 || zinc finger protein 266 (1)	0.05	0.03	-0.46	-0.03	-0.147	-3.58e-09	-0.077	0.01	-0.137	-0.507	-0.79
10782	ZNF274 || zinc finger protein 274 (1)	0.055	-0.055	-0.945	0.055	0.46	0.217	-1.02	-0.0955	-0.36	0.01	0.0995
10785	WDR4 || WD repeat domain 4 (3)	-0.132	0.088	0.012	-0.012	-0.0573	1.38e-10	0.956	-0.433	-0.047	-0.114	-0.0563
10787	NCKAP1 || NCK-associated protein 1 (1)	-0.29	-0.19	0.19	0.47	0.368	0.115	-0.672	0.025	-0.522	-0.0117	0.155
10793	ZNF273 || zinc finger protein 273 (4)	-0.416	0.0565	-0.0565	0.279	0.4	0.247	-0.7	0.545	-0.25	-3.52e-08	-0.545
10795	ZNF268 || zinc finger protein 268 (1)	-0.04	-0.17	0.04	0.57	-6.26e-09	0.667	-0.925	0.33	0.345	0.185	-0.33
10797	MTHFD2 || methylenetetrahydrofolate dehydrogenase (NADP+ dependent) 2, methenyltetrahydrofolate cyclohydrolase (2)	-0.315	-0.265	0.515	0.265	5.66e-09	0.517	0.105	0.77	0.525	0.915	0.06
10801	SEPT9 || septin 9 (1)	0.17	0.2	-0.17	-1.24	0.08	-1.01	9.54e-09	-0.893	-0.81	-1.2	-0.063
10806	SDCCAG8 || serologically defined colon cancer antigen 8 (1)	0.345	-0.015	0.015	-0.245	0.57	0.647	4.77e-09	0.512	0.03	-0.97	-0.538
10807	SDCCAG3 || serologically defined colon cancer antigen 3 (4)	-0.0585	0.0235	0.0165	-0.0165	-0.422	-0.561	0.63	-0.392	-0.64	0.045	0.032
10808	HSPH1 || heat shock 105kDa/110kDa protein 1 (2)	-0.417	-0.438	0.417	0.453	0.665	0.802	-0.725	0.0345	-2.38e-09	-0.18	-0.505
10809	STARD10 || START domain containing 10 (4)	0.115	0.28	-0.115	-1.05	-0.542	0.0184	0.673	0.253	0.0483	-0.465	-0.253
10827	C5orf3 || chromosome 5 open reading frame 3 (1)	0.075	-0.075	-0.315	0.355	0.139	-0.0738	0.0292	0.275	0.509	-0.441	-0.265
10838	ZNF275 || zinc finger protein 275 (2)	-0.163	-0.482	0.163	0.652	-0.34	-0.153	0.075	0.0425	0.02	-0.02	-0.142
10844	TUBGCP2 || tubulin, gamma complex associated protein 2 (1)	-0.31	0.17	0.01	-0.01	-0.3	0.237	0.9	-0.145	-0.03	-1.37e-08	0.145
10848	PPP1R13L || protein phosphatase 1, regulatory (inhibitor) subunit 13 like (1)	0.35	0.32	-0.32	-0.9	-0.1	-0.463	0.37	-0.958	1.19e-08	-0.73	-0.478
10858	CYP46A1 || cytochrome P450, family 46, subfamily A, polypeptide 1 (1)	0.19	-2.78e-17	-0.07	0	-0.45	0.117	0.54	-0.805	-1.79e-09	-0.41	-0.115
10865	ARID5A || AT rich interactive domain 5A (MRF1-like) (1)	0.515	0.665	-0.515	-1.23	0.488	-0.935	0.978	-0.04	-0.292	-2.04	0.04
10867	TSPAN9 || tetraspanin 9 (2)	0.265	0.04	-0.04	-0.8	0.283	-0.68	0.543	-0.36	0.398	-0.647	0.075
10874	NMU || neuromedin U (1)	-0.09	0.15	0.09	-0.27	-0.087	-1.19e-09	-0.247	0.467	0.183	0.073	-0.523
10884	MRPS30 || mitochondrial ribosomal protein S30 (1)	0.02	-0.02	0.32	-0.07	-0.18	0.407	-0.27	0.182	0.06	-2.32e-08	-0.118
10885	WDR3 || WD repeat domain 3 (1)	-0.405	-0.395	0.395	0.605	0.46	0.277	0.17	0.223	-0.215	-1.6	0.228
10890	RAB10 || RAB10, member RAS oncogene family (3)	-0.105	0.128	-0.132	0.105	-0.04	-3.8e-10	-0.457	0.314	0.337	0.06	-0.314
10898	CPSF4 || cleavage and polyadenylation specific factor 4, 30kDa (1)	0.05	0.21	-0.05	-0.6	3.9e-08	-0.563	0.69	-0.925	-0.06	-0.36	-0.045
10901	DHRS4 || dehydrogenase/reductase (SDR family) member 4 (2)	0.12	0.46	-0.13	-0.12	-0.01	0.017	-0.49	-0.02	-1.43e-08	-0.15	-0.56
10904	BLCAP || bladder cancer associated protein (1)	0.005	-0.005	0.135	-0.495	-0.41	-0.153	-0.195	-0.07	0.61	0.55	0.07
10906	TRAFD1 || TRAF-type zinc finger domain containing 1 (2)	-0.265	0.255	-0.015	0.015	-0.947	2.68e-09	-0.137	-0.415	-0.427	-0.942	-0.945
10907	TXNL4A || thioredoxin-like 4A (1)	0.23	0.03	-0.03	-0.9	-0.18	0.017	0.01	-0.131	-0.1	-0.13	-0.37
10910	SUGT1 || SGT1, suppressor of G2 allele of SKP1 (S. cerevisiae) (2)	-0.01	-0.065	0.12	0.01	0.948	0.4	-0.427	0.228	-0.00165	0.613	-0.228
10914	PAPOLA || poly(A) polymerase alpha (3)	-0.501	-0.382	0.382	1.03	0.21	0.274	-0.043	0.0103	5.96e-09	-0.68	-0.0993
10915	TCERG1 || transcription elongation regulator 1 (2)	2.1e-08	-0.18	0.195	0	-0.465	-1.06	2.38e-09	-0.173	-0.512	-0.275	-0.873
10916	MAGED2 || melanoma antigen family D, 2 (2)	-0.168	0.0675	0.163	-0.0675	-0.09	0.147	0.542	-0.14	-0.275	0.135	0.14
10919	BAT8 || HLA-B associated transcript 8 (1)	0.265	-0.315	0.115	-0.115	0.18	-0.333	0.105	-0.191	0.685	0.73	0.58
10921	RNPS1 || RNA binding protein S1, serine-rich domain (2)	0.08	0.2	-0.08	-0.315	-0.585	-0.368	0.17	-0.145	-0.08	2.44e-08	0.145
10922	FASTK || Fas-activated serine/threonine kinase (5)	-0.115	0.115	0.535	-0.387	-0.102	-0.167	1.51	-0.19	-0.009	0.156	0.19
10923	PC4 || activated RNA polymerase II transcription cofactor 4 (2)	-0.362	-0.158	0.158	0.432	-1.49e-09	0.537	-0.085	0.115	-0.175	0.67	-0.115
10927	SPIN || spindlin (1)	0.05	-0.12	-0.05	0.53	-0.257	-1.07e-08	-0.117	0.255	0.393	0.593	-0.255
10929	SRP46 || Splicing factor, arginine/serine-rich, 46kD (1)	-0.26	-7.45e-10	0.36	0	-0.473	0.114	-0.143	-0.13	-0.114	-0.464	-0.83
10934	MORF4 || mortality factor 4 (1)	-0.025	0.025	-0.085	0.845	0.58	0.837	-0.34	0.14	0.39	0.57	-0.14
10938	EHD1 || EH-domain containing 1 (1)	-7.6e-09	-0.02	0.18	0	-0.77	-0.913	0.26	-0.748	-0.67	-0.73	-0.328
10939	AFG3L2 || AFG3 ATPase family gene 3-like 2 (yeast) (2)	-0.535	-0.415	0.415	0.645	0.07	0.147	-0.51	-0.735	0.03	-1.12	0.495
10940	POP1 || processing of precursor 1, ribonuclease P/MRP subunit (S. cerevisiae) (1)	0.045	-0.245	-0.045	0.945	2e-08	0.287	0.91	0.707	0.725	0.26	-0.053
10943	MSL3L1 || male-specific lethal 3-like 1 (Drosophila) (3)	0.085	-0.425	0.115	-0.085	-0.035	-0.383	-0.38	0.405	0.16	-1.18	-0.931
10944	SMAP || small acidic protein (3)	-0.145	0.145	-0.105	0.105	0.12	0.733	-0.684	1.06	-0.26	0.236	-0.493
10945	KDELR1 || KDEL (Lys-Asp-Glu-Leu) endoplasmic reticulum protein retention receptor 1 (2)	0.03	-0.03	0.45	-0.17	-0.797	-0.00465	0.288	3.7e-08	-0.0617	0.158	0.42
10946	SF3A3 || splicing factor 3a, subunit 3, 60kDa (2)	0.005	0.165	-0.415	-0.005	-0.005	-0.013	-0.975	0.03	0.04	-8.94e-09	-0.03
10947	AP3M2 || adaptor-related protein complex 3, mu 2 subunit (1)	-0.045	-0.545	0.045	0.275	-0.4	-0.073	0.08	0.335	0.26	0.18	0.065
10948	STARD3 || START domain containing 3 (1)	-0.02	0.37	0.02	-0.9	-0.52	-0.423	1.32	-0.122	-2.09e-09	-0.56	0.122
10951	CBX1 || chromobox homolog 1 (HP1 beta homolog Drosophila ) (4)	0.08	-0.08	-0.09	1.54	0.16	0.017	-1.4	-0.18	-2.62e-08	0.08	0.18
10952	SEC61B || Sec61 beta subunit (2)	0.24	0.42	-0.24	-0.65	-2.77e-08	0.027	-0.525	0.29	0.505	0.505	0.39
10953	TOMM34 || translocase of outer mitochondrial membrane 34 (1)	-0.18	0.09	0.15	-0.09	0.16	0.147	-0.54	-0.108	-4.77e-09	-0.15	0.082
10954	PDIA5 || protein disulfide isomerase-associated 5 (2)	-0.01	0.01	-0.25	0.32	-0.015	0.492	-4.05e-08	-0.34	0.655	-0.705	0.34
10955	TDE1 || tumor differentially expressed 1 (4)	-0.18	-0.07	0.16	0.07	-0.455	-0.198	3.1e-08	0.143	-0.1	0.032	-0.143
10960	LMAN2 || lectin, mannose-binding 2 (1)	-0.105	0.315	0.105	-0.475	-2.98e-09	0.337	0.08	0.827	-0.27	-0.06	-0.183
10962	MLLT11 || myeloid/lymphoid or mixed-lineage leukemia (trithorax homolog, Drosophila); translocated to, 11 (1)	0.215	-0.075	0.075	-0.185	4.47e-09	0.367	-0.29	0.645	1.36	1.38	-0.005
10963	STIP1 || stress-induced-phosphoprotein 1 (Hsp70/Hsp90-organizing protein) (1)	0.36	0.14	-0.14	-0.59	-1.34e-08	0.257	0.57	-0.136	0.06	0.29	0.054
10965	ZAP128 || peroxisomal long-chain acyl-coA thioesterase (2)	-0.0725	0.172	0.0725	-0.258	-0.167	2.03e-08	0.313	0.145	0.013	0.248	0.295
10966	RAB40B || RAB40B, member RAS oncogene family (1)	-0.025	0.025	0.025	-0.345	0.063	5.96e-09	-0.447	0.157	0.263	-0.367	-0.373
10970	CKAP4 || cytoskeleton-associated protein 4 (1)	-0.03	0.03	0.17	-0.25	-0.25	-0.143	0.1	0.035	2.98e-09	1.09	-0.035
10971	YWHAQ || tyrosine 3-monooxygenase/tryptophan 5-monooxygenase activation protein, theta polypeptide (2)	0.0075	-0.0875	-0.0075	0.412	-0.435	-0.278	-1.16	0.415	-1.19e-08	0.27	-0.415
10973	ASCC3 || activating signal cointegrator 1 complex subunit 3 (1)	-0.025	0.025	-0.425	0.215	0.69	0.257	-0.57	-0.005	-0.11	-5.96e-09	0.005
10975	UQCR || ubiquinol-cytochrome c reductase, 6.4kDa subunit (2)	0.273	0.223	-0.223	-0.273	-0.4	0.242	0.145	0.347	5.96e-09	0.37	-0.158
10978	HEAB || ATP/GTP-binding protein (1)	0.005	-0.125	0.115	-0.005	-0.16	-0.023	0.05	-0.725	0.16	0.03	0.095
10982	MAPRE2 || microtubule-associated protein, RP/EB family, member 2 (1)	-0.22	0.13	0.15	-0.13	-0.157	1.19e-09	-1.01	0.175	0.483	0.493	-0.82
10985	GCN1L1 || GCN1 general control of amino-acid synthesis 1-like 1 (yeast) (1)	0.285	0.135	-0.135	-0.145	0.382	-0.0315	0.481	0.182	-0.118	0.0315	-0.018
10987	COPS5 || COP9 constitutive photomorphogenic homolog subunit 5 (Arabidopsis) (2)	-0.352	-0.193	0.383	0.193	-0.135	0.037	-0.305	-0.195	1.06	0.735	0.195
10988	METAP2 || methionyl aminopeptidase 2 (2)	-3.86e-08	-3.75e-08	-0.06	0.43	0.395	0.627	-0.82	0.748	-0.025	0.28	-0.282
10994	ILVBL || ilvB (bacterial acetolactate synthase)-like (13)	-0.078	0.078	0.618	-0.09	-0.455	0.138	1.65	0.176	-0.258	0	-0.176
11004	KIF2C || kinesin family member 2C (2)	0.31	0.6	-0.56	-0.31	-0.14	1	0.13	0.095	-1.67e-08	-2.11	-0.095
11011	TLK2 || tousled-like kinase 2 (2)	-0.12	-0.34	0.12	0.54	0.015	0.252	0.135	-0.361	-1.19e-08	-0.02	0.0685
11014	KDELR2 || KDEL (Lys-Asp-Glu-Leu) endoplasmic reticulum protein retention receptor 2 (1)	-0.195	-0.175	0.465	0.175	-0.15	0.147	-0.18	-0.025	0.53	0.96	0.025
11015	KDELR3 || KDEL (Lys-Asp-Glu-Leu) endoplasmic reticulum protein retention receptor 3 (3)	-0.0955	0.0315	0.511	-0.0315	-0.167	-0.076	-2.62e-08	-0.205	0.58	0.29	0.205
11017	RY1 || putative nucleic acid binding protein RY-1 (2)	-0.0925	0.122	0.0925	-0.228	0.44	0.752	-0.525	0.9	0.325	0.04	0.22
11018	TMED1 || transmembrane emp24 domain containing 1 (1)	-0.25	0.12	-3.28e-09	0	-0.177	1.19e-09	1.75	-1.48	-0.257	-0.047	-0.183
11019	LIAS || lipoic acid synthetase (2)	-0.152	0.198	0.152	-0.172	0.67	0.632	-0.405	0.497	0.495	-2.08	0.0375
11020	RABL4 || RAB, member of RAS oncogene family-like 4 (2)	0.465	0.495	-0.465	-0.905	-0.435	-0.233	0.64	0.0895	-0.085	-3.58e-09	-0.111
11021	RAB35 || RAB35, member RAS oncogene family (2)	0.46	1.35	-0.47	-0.46	8.94e-10	-0.978	0.105	-0.23	-0.395	-1.26	-0.03
11022	TDRKH || tudor and KH domain containing (1)	0.035	-0.255	-0.035	0.465	0.01	1.01	-0.12	0.275	-0.01	0.38	-0.315
11031	RAB31 || RAB31, member RAS oncogene family (3)	-0.506	-0.257	0.257	1.19	-0.845	-0.11	-0.493	-0.602	-0.073	0.17	-0.797
11034	DSTN || destrin (actin depolymerizing factor) (1)	-0.42	-0.2	0.2	0.23	0.47	0.977	-1.1	1.01	0.34	0.69	-0.21
11039	SMA4 || SMA4 (1)	-0.025	0.025	0.085	-0.305	5.66e-09	0.827	0.61	0.642	-0.66	0.56	-0.778
1104	RCC1 || regulator of chromosome condensation 1 (2)	0.17	0.31	-0.17	-0.55	0.08	-0.003	0.55	-0.843	0.49	1.73e-08	0.207
11040	PIM2 || pim-2 oncogene (1)	0.045	-0.045	0.245	-0.445	-0.38	-0.593	0.27	-0.428	2.15e-08	-0.61	-0.138
11041	B3GNT6 || UDP-GlcNAc:betaGal beta-1,3-N-acetylglucosaminyltransferase 6 (1)	0.12	0.43	-0.12	-1.06	0.0184	-0.345	-1.04	1	0.318	0.0984	-0.315
11047	ADRM1 || adhesion regulating molecule 1 (1)	0.06	0.2	-0.06	-0.66	-0.54	-0.233	0.87	-0.69	-5.96e-10	0.03	-3.55e-08
11049	YDD19 || YDD19 protein (1)	-0.59	-0.71	0.59	0.91	-0.275	0.832	-0.015	-0.078	-0.385	-1	-0.398
1105	CHD1 || chromodomain helicase DNA binding protein 1 (2)	0.198	-0.198	-0.242	0.438	0.27	-0.008	8.94e-10	-2.09e-09	0.54	0.275	6.56e-09
11051	CPSF5 || cleavage and polyadenylation specific factor 5, 25 kDa (1)	-0.035	-0.355	0.465	0.035	-0.142	0.0353	-0.232	-0.32	-0.122	0.258	-2.09e-09
11057	ABHD2 || abhydrolase domain containing 2 (2)	-0.17	-0.1	0.26	0.1	-0.457	-0.775	-0.547	-0.698	1.08	0.783	0.202
11059	WWP1 || WW domain containing E3 ubiquitin protein ligase 1 (3)	-0.301	-0.288	0.288	0.876	0.257	0.127	-0.116	0.402	0.217	9.42e-09	-0.285
1106	CHD2 || chromodomain helicase DNA binding protein 2 (2)	-0.378	0.378	-0.627	0.777	0.29	0.762	-0.543	0.121	-0.117	-0.765	-0.121
11064	CEP1 || centrosomal protein 1 (1)	0.3	-2.32e-08	-0.54	0	0.384	0.521	0.0442	0.125	-0.196	-0.486	0.035
11065	UBE2C || ubiquitin-conjugating enzyme E2C (2)	-0.245	-0.2	0.2	0.29	-0.703	-0.356	-4.29e-10	0.462	0.247	1.97	-0.165
11068	CYB561D2 || cytochrome b-561 domain containing 2 (2)	0.11	-0.07	-4.14e-08	0	-0.8	-0.373	0.5	-0.92	-0.535	2.2e-08	-0.08
11073	TOPBP1 || topoisomerase (DNA) II binding protein 1 (1)	-0.1	-0.13	0.1	0.27	0.21	0.127	-0.68	0.855	0.03	-0.51	-0.195
11078	HRIHFB2122 || Tara-like protein (10)	0.067	-0.067	0.308	-0.348	0.428	-0.344	1.27	-0.196	-0.21	-2.34	0.196
11079	RER1 || RER1 retention in endoplasmic reticulum 1 homolog (S. cerevisiae) (3)	0.339	-0.277	0.0885	-0.0885	-0.228	0.205	0.475	-0.0315	0.0754	0.15	0.162
1108	CHD4 || chromodomain helicase DNA binding protein 4 (1)	0.62	0.16	-0.58	-0.16	0.553	-4.77e-09	0.193	-0.076	0.103	0.103	0.554
11080	DNAJB4 || DnaJ (Hsp40) homolog, subfamily B, member 4 (1)	-0.47	-0.79	0.47	0.56	0.148	0.505	-0.382	0.34	-0.342	0.158	-0.34
11083	DATF1 || death associated transcription factor 1 (2)	0.13	-0.1	0.07	-0.07	0.203	1.19e-09	1.11	0.428	-0.182	-0.007	-0.167
11091	WDR5 || WD repeat domain 5 (1)	-0.18	-0.16	0.5	0.16	-0.02	-0.253	0.01	-0.698	0.32	-0.15	-0.348
11093	ADAMTS13 || a disintegrin-like and metalloprotease (reprolysin type) with thrombospondin type 1 motif, 13 (1)	0.12	2.69e-08	-1.4	0	0.531	-0.792	0.711	0.159	0.0577	-1.54	0.027
11094	C9orf7 || chromosome 9 open reading frame 7 (2)	0.07	-0.02	0.02	-0.735	-1.58e-08	-0.458	1.01	-0.235	-0.042	-0.695	-0.035
11097	NUPL2 || nucleoporin like 2 (3)	-0.364	-0.102	0.102	0.208	0.174	0.321	0.03	0.0415	0.107	4.77e-10	-0.0415
11098	PRSS23 || protease, serine, 23 (1)	-0.105	0.015	-0.015	0.525	-3.28e-09	0.352	-0.465	-0.515	0.035	0.715	-0.0905
11100	HNRPUL1 || heterogeneous nuclear ribonucleoprotein U-like 1 (1)	0.56	0.19	-0.19	-0.56	0.46	-0.503	0.91	-1.14	0.28	5.96e-10	0.284
11101	ATE1 || arginyltransferase 1 (2)	-0.42	-0.32	0.32	0.455	0.775	0.792	0	0.265	0.975	0.365	-0.265
11102	RPP14 || ribonuclease P 14kDa subunit (2)	0.0575	-0.0325	0.0325	-0.0425	0.165	0.407	1.31e-08	0.228	0.075	-0.16	-0.228
11103	HRB2 || HIV-1 rev binding protein 2 (2)	-0.21	-0.02	0.42	0.02	-3.87e-09	0.292	-0.935	0.667	0.075	0.025	-0.667
11108	PRDM4 || PR domain containing 4 (2)	-0.362	-0.273	0.273	0.598	0.408	-3.22e-08	-0.902	-0.163	0.088	-0.282	-0.163
11112	HIBADH || 3-hydroxyisobutyrate dehydrogenase (1)	-0.29	-0.1	0.1	0.43	0.45	0.757	2.38e-09	1.43	0.57	0.68	0.27
11113	CIT || citron (rho-interacting, serine/threonine kinase 21) (1)	0.53	0.33	-0.42	-0.33	0.19	-0.513	0.535	0.792	0.265	-0.35	0.057
11116	FGFR1OP || FGFR1 oncogene partner (1)	-0.04	5.44e-09	0.85	0	0.87	0.967	-0.56	0.872	0.62	0.16	-0.648
11118	BTN3A2 || butyrophilin, subfamily 3, member A2 (2)	-0.16	0.06	0.1	-0.06	0.02	0.197	-0.43	-0.198	0.785	-2.61	-0.217
1112	CHES1 || checkpoint suppressor 1 (2)	-0.075	0.035	-0.035	0.465	0.12	-0.068	-7.15e-09	0.662	0.3	-0.715	-0.228
11120	BTN2A1 || butyrophilin, subfamily 2, member A1 (1)	0.135	-0.135	-0.525	0.225	0.54	0.527	-0.22	-0.177	0.28	-0.8	0.177
11124	FAF1 || Fas (TNFRSF6) associated factor 1 (5)	-0.521	-0.013	0.367	0.013	-0.468	0.361	4.29e-09	-0.06	-0.166	0.055	0.06
11128	POLR3A || polymerase (RNA) III (DNA directed) polypeptide A, 155kDa (2)	0.08	-0.09	-0.08	0.49	0.25	0.217	0.285	-0.083	0.035	1.25e-08	0.277
11130	ZWINT || ZW10 interactor (2)	-0.09	0.09	-0.62	0.2	-0.305	-0.113	9.54e-09	0.07	0.31	0.575	-0.07
11133	KPTN || kaptin (actin binding protein) (1)	-0.3	4.25e-09	0.01	0	-0.622	-0.485	0.498	-0.173	0.238	-0.0916	0.497
11135	CDC42EP1 || CDC42 effector protein (Rho GTPase binding) 1 (1)	0.145	0.505	-0.145	-0.775	-0.375	-1.01	1.14	-0.44	-0.025	-0.225	1.29
11137	PWP1 || PWP1 homolog (S. cerevisiae) (1)	-0.06	-6.48e-09	0.09	0	0.33	0.517	3.58e-09	-0.075	1.33	1.28	0.285
11140	CDC37 || CDC37 cell division cycle 37 homolog (S. cerevisiae) (3)	0.19	0.4	-0.65	-0.19	-0.12	0.487	0.81	0.245	0.08	-0.15	-0.325
11143	MYST2 || MYST histone acetyltransferase 2 (2)	0.02	-0.02	-0.405	0.255	-0.212	2.03e-08	-0.032	-0.0355	-0.794	-0.147	-1.11
11145	HRASLS3 || HRAS-like suppressor 3 (1)	0.28	9.69e-10	-0.01	0	-0.107	6.56e-09	-0.007	-0.618	-0.037	-0.257	-0.438
11146	GLMN || glomulin, FKBP associated protein (3)	-0.64	-0.36	0.4	0.36	0.417	0.424	-0.86	0.476	-0.113	-2.32e-08	-0.476
11147	HHLA3 || HERV-H LTR-associating 3 (1)	-0.015	0.145	0.015	-0.285	-1.09	2.03e-08	-0.557	-0.245	0.783	1.01	0.675
11149	BVES || blood vessel epicardial substance (1)	0.04	-0.28	0.51	-0.04	0.07	-0.193	-0.25	0.133	0.03	-5.36e-09	-0.133
11152	WDR45 || WD repeat domain 45 (2)	0.323	0.412	-0.323	-0.557	-0.097	-1.19e-09	0.678	-0.065	0.258	-0.032	0.065
11156	PTP4A3 || protein tyrosine phosphatase type IVA, member 3 (2)	0.155	0.215	-0.155	-0.74	-0.07	-0.703	0.97	-0.27	-0.463	-0.15	0.27
11157	LSM6 || LSM6 homolog, U6 small nuclear RNA associated (S. cerevisiae) (2)	0.06	0.61	-0.06	-0.08	-0.25	0.367	-0.53	0.39	-0.35	0.25	-0.925
11158	RABL2B || RAB, member of RAS oncogene family-like 2B (3)	0.093	-0.007	0.007	-0.253	-0.233	-0.253	7.03e-09	-0.025	0.497	0.454	0.025
11159	RABL2A || RAB, member of RAS oncogene family-like 2A (3)	-0.033	0.237	0.033	-0.187	-0.39	-0.353	9.54e-09	0.141	0.48	0.027	-0.0565
11164	NUDT5 || nudix (nucleoside diphosphate linked moiety X)-type motif 5 (2)	0.0075	-0.0825	0.0425	-0.0075	-2.68e-09	0.092	-0.088	0.016	-0.13	0.195	-0.3
11167	FSTL1 || follistatin-like 1 (3)	-0.65	0.07	-0.07	0.545	-0.587	0.42	-0.247	-0.174	-0.0137	0.613	0.146
11168	PSIP1 || PC4 and SFRS1 interacting protein 1 (9)	-0.405	0.405	-0.925	0.685	-0.26	0.283	0.028	0.315	-0.33	0.19	-0.315
11169	WDHD1 || WD repeat and HMG-box DNA binding protein 1 (1)	-0.02	0.02	-0.17	0.06	0.68	0.457	-0.11	0.552	0.09	5.36e-09	-0.138
11171	STRAP || serine/threonine kinase receptor associated protein (2)	0.005	-0.005	0.275	-0.06	2e-08	0.802	-0.265	0.092	-0.23	1.25e-08	-0.093
11176	BAZ2A || bromodomain adjacent to zinc finger domain, 2A (1)	0.02	0.26	-0.81	-0.02	0.42	-0.623	0.96	0.0825	-0.02	-0.3	-0.0825
11177	BAZ1A || bromodomain adjacent to zinc finger domain, 1A (1)	-1.85	0.17	-0.17	0.74	0.51	0.552	-0.59	0.352	0.29	-0.14	-0.352
11179	ZNF277 || zinc finger protein 277 (1)	-0.41	-0.41	0.61	0.41	0.213	-2.38e-09	-1.23	0.165	-0.547	-0.277	-0.165
11180	WDR6 || WD repeat domain 6 (1)	0.225	0.345	-0.225	-0.465	-0.31	-0.743	0.24	-0.865	4.47e-10	0.17	0.505
11182	SLC2A6 || solute carrier family 2 (facilitated glucose transporter), member 6 (1)	0.105	0.065	-0.065	-0.925	-0.22	-1.16	0.82	-0.555	-0.41	-0.94	0.035
11183	MAP4K5 || mitogen-activated protein kinase kinase kinase kinase 5 (1)	0.12	-0.12	-1.73	0.5	0.874	0.431	-1.22	1.28	0.224	0.334	-0.025
11186	RASSF1 || Ras association (RalGDS/AF-6) domain family 1 (2)	-0.468	-0.152	0.152	0.583	-0.502	0.285	-1.6e-10	-0.34	-0.364	1.02	-0.583
11188	NISCH || nischarin (1)	0.455	-0.075	0.075	-0.255	0.23	-0.213	0.69	-0.966	-0.02	1.01e-08	0.214
1119	CHKA || choline kinase alpha (2)	-0.23	-0.96	0.57	0.23	-0.015	0.107	0.215	0.242	0.85	0.485	0.582
11190	CEP2 || centrosomal protein 2 (1)	0.17	-0.17	0.41	-0.45	1.12	-0.083	1.92	0.092	-7.15e-09	-0.75	0.312
11194	ABCB8 || ATP-binding cassette, sub-family B (MDR/TAP), member 8 (1)	3.29e-08	0.15	-0.48	0	-0.51	-0.063	1.62	-0.005	-2.09e-09	0.15	0.005
11196	SEC23IP || SEC23 interacting protein (3)	-0.357	-0.297	0.297	1.24	0.27	0.437	-0.966	0.465	-5.48e-09	-0.5	-0.481
11198	SUPT16H || suppressor of Ty 16 homolog (S. cerevisiae) (1)	0.345	0.175	-0.175	-0.265	0.183	5.96e-09	-0.482	0.207	-0.182	0.028	0.627
1120	CHKB || choline kinase beta (10)	-0.036	0.036	0.428	-0.087	-0.043	1.67e-09	0.945	0.0165	-0.368	-0.28	-0.0165
11200	CHEK2 || CHK2 checkpoint homolog (S. pombe) (2)	-0.0825	-0.0875	0.142	0.0825	-0.315	0.112	-0.48	0.275	-3.58e-09	0.185	-0.275
11215	AKAP11 || A kinase (PRKA) anchor protein 11 (2)	0.085	-0.695	-0.085	0.275	0.518	0.0254	-0.237	0.186	-0.135	1.49	-0.167
11216	AKAP10 || A kinase (PRKA) anchor protein 10 (1)	-0.44	-0.62	0.44	0.58	-2.3e-08	0.407	0.37	0.18	0.59	0.18	0.02
11218	DDX20 || DEAD (Asp-Glu-Ala-Asp) box polypeptide 20 (1)	-0.315	-0.295	0.445	0.295	0.38	0.227	0	0.635	0.24	0.11	-0.105
11219	TREX2 || three prime repair exonuclease 2 (2)	-0.055	0.35	0.055	-0.995	-0.76	-0.673	0.193	-0.657	-0.765	-2.2	0.0238
11222	MRPL3 || mitochondrial ribosomal protein L3 (3)	-0.365	-0.065	0.155	0.065	0.385	0.822	-0.112	-0.275	-0.26	0.488	0.508
1123	CHN1 || chimerin (chimaerin) 1 (1)	-9.98e-09	-0.2	0.36	0	-0.172	0.115	-0.312	0.19	-0.302	0.248	-0.495
11230	PRAF2 || PRA1 domain family, member 2 (1)	0.15	0.1	-0.1	-0.4	-0.447	-2.74e-08	-0.447	-0.24	0.033	0.313	0.1
11234	HPS5 || Hermansky-Pudlak syndrome 5 (1)	-0.275	-0.385	0.275	0.545	0.31	0.677	0.34	-0.743	-0.17	0.4	0.387
11235	PDCD10 || programmed cell death 10 (3)	-0.302	-0.0825	0.0825	0.367	-2.3e-08	0.184	-0.717	-0.325	0.33	1.12	-0.315
112398	EGLN2 || egl nine homolog 2 (C. elegans) (2)	-0.02	0.36	0.02	-0.76	0.2	-0.323	0.795	-0.653	0	-0.195	0.653
11243	PMF1 || polyamine-modulated factor 1 (1)	0.31	0.14	-0.14	-0.47	-0.1	-0.463	0.73	-0.758	-0.02	5.36e-09	0.552
112483	SAT2 || spermidine/spermine N1-acetyltransferase 2 (2)	0.015	0.2	-0.015	-0.98	0.165	0.362	0.55	0.289	0.285	-4.17e-09	0.104
112495	C6orf51 || chromosome 6 open reading frame 51 (2)	0.09	0.3	-0.09	-0.22	0.485	0.562	-1.02	-0.055	0.26	2.44e-08	-0.865
11253	MAN1B1 || mannosidase, alpha, class 1B, member 1 (1)	1.94e-09	-0.01	0.12	0	-4.2e-08	-0.313	1.36	-1.02	-0.12	-0.2	-0.165
11257	TP53AP1 || TP53 activated protein 1 (1)	0.76	0.29	-0.29	-0.8	-0.68	-0.093	-1.79e-09	-0.258	-0.01	-0.61	-0.758
11260	XPOT || exportin, tRNA (nuclear export receptor for tRNAs) (2)	-0.135	-0.085	0.085	0.925	0.275	-0.108	-1.33	0.07	0.055	-0.25	-0.07
112616	CKLFSF7 || chemokine-like factor super family 7 (2)	0.26	0.3	-0.26	-0.61	-0.635	-0.193	-0.22	-1.13	-2.62e-08	-0.05	-0.9
11266	DUSP12 || dual specificity phosphatase 12 (1)	-0.115	0.035	0.245	-0.035	-0.19	0.387	-0.08	0.425	3.58e-08	0.17	-0.425
11267	EAP30 || EAP30 subunit of ELL complex (1)	0.15	0.35	-0.15	-0.47	-6.26e-09	0.207	0.11	-0.01	0.21	0.17	0.13
11269	DDX19 || DEAD (Asp-Glu-Ala-As) box polypeptide 19 (2)	0.185	0.235	-0.485	-0.185	-1.34e-08	0.507	-0.6	0.04	0.015	0.04	-0.04
11270	NRM || nurim (nuclear envelope membrane protein) (1)	0.15	-0.15	0.22	-0.35	-0.5	-0.393	0.29	-1.55e-08	-0.2	-0.07	1.2
112703	LOC112703 || hypothetical protein BC004941 (2)	0.205	0.075	-0.075	-0.555	-0.045	-0.258	0.92	-0.3	-0.18	1.25e-08	0.3
11272	PRR4 || proline rich 4 (lacrimal) (1)	4.72e-08	-0.07	4.92e-08	0.18	3.28e-09	0.507	-0.17	0.665	0.03	0.22	-0.035
112724	RDH13 || retinol dehydrogenase 13 (all-trans and 9-cis) (1)	-0.01	0.12	0.01	-0.37	-0.0817	-0.405	1.45	-0.105	0.178	0.188	0.105
11273	ATXN2L || ataxin 2-like (3)	2.29	0.515	-0.775	-0.515	-0.667	-2.09e-09	-0.007	-0.256	-0.662	-0.617	0.256
11274	USP18 || ubiquitin specific protease 18 (2)	-0.19	-0.69	0.19	0.41	-0.265	-0.323	-0.28	-0.402	-0.187	-3.58e-09	-0.862
112752	MGC16028 || MGC16028 similar to RIKEN cDNA 1700019E19 gene (1)	0.085	0.145	-0.085	-0.605	-0.59	0.187	-0.08	-0.34	-1.64e-09	0.4	-0.4
11276	AP1GBP1 || AP1 gamma subunit binding protein 1 (1)	-0.11	-0.38	0.11	0.47	0.44	0.457	-0.27	-0.42	-4.77e-09	-1.81	0.005
112770	C1orf85 || chromosome 1 open reading frame 85 (3)	0.01	-0.26	0.59	-0.01	-0.62	-0.303	0.34	-0.26	-0.29	3.64e-08	-8.32e-08
11278	KLF12 || Kruppel-like factor 12 (1)	0.065	0.015	-0.635	-0.015	0.0075	-0.0255	-0.0075	0.394	0.0655	0.603	0.212
11282	MGAT4B || mannosyl (alpha-1,3-)-glycoprotein beta-1,4-N-acetylglucosaminyltransferase, isoenzyme B (3)	-0.0985	0.248	0.0985	-0.692	-0.703	0.0237	0.777	0.044	-0.2	-0.318	-0.044
11284	PNKP || polynucleotide kinase 3'-phosphatase (2)	-0.15	0.15	0.19	-0.38	0.0534	-0.415	1.49	-0.37	0.0184	-0.0367	0.37
112849	C14orf149 || chromosome 14 open reading frame 149 (1)	-0.005	-0.295	0.215	0.005	-0.147	7.15e-09	0.483	0.31	-0.017	0.163	-0.31
11285	B4GALT7 || xylosylprotein beta 1,4-galactosyltransferase, polypeptide 7 (galactosyltransferase I) (1)	-0.065	0.605	0.065	-0.555	-0.117	2.38e-09	1.53	0.185	0.143	-0.057	-0.185
112858	TP53RK || TP53 regulating kinase (2)	-0.242	-0.787	0.242	0.682	-0.218	0.0035	-0.129	-0.388	0.127	-0.0035	-0.0825
112869	LOC112869 || hypothetical protein BC011981 (1)	0.59	0.26	-0.26	-0.58	-0.48	0.257	0.25	-0.43	0.26	-1.03	-0.09
112885	PHF21B || PHD finger protein 21B (1)	0.515	0.205	-0.205	-0.345	0.32	-0.143	-4.77e-09	0.3	0.12	0.02	0.41
112936	MGC10485 || hypothetical protein MGC10485 (2)	0.0525	-0.0525	0.247	-0.762	1.79e-09	-0.548	0.315	-0.487	0.14	-0.3	0.0075
112939	BTBD14B || BTB (POZ) domain containing 14B (2)	-2.43e-08	-0.11	0.12	0	-1.82e-08	-0.828	-0.34	-0.518	-0.935	-0.09	0.582
112942	MGC15407 || similar to RIKEN cDNA 4931428D14 gene (2)	0.315	0.965	-0.465	-0.315	0.75	0.952	-0.86	0.795	0.67	0.1	-0.41
112950	MED8 || mediator of RNA polymerase II transcription, subunit 8 homolog (yeast) (2)	-0.125	-0.2	0.47	0.125	0.025	0.362	-0.69	-0.08	0.16	-0.25	0.08
1130	LYST || lysosomal trafficking regulator (1)	0.27	0.26	-0.5	-0.26	0.869	0.266	0.569	0.245	-0.0708	-0.271	-0.245
113000	RPUSD1 || RNA pseudouridylate synthase domain containing 1 (1)	0.23	0.52	-0.23	-0.91	-0.47	-0.313	1.2	0.1	2.98e-10	0.28	-0.1
11311	VPS45A || vacuolar protein sorting 45A (yeast) (1)	-0.145	-0.065	0.065	0.305	1.28e-08	0.897	0.44	0.732	0.49	0.85	0.162
113115	FAM54A || family with sequence similarity 54, member A (1)	0.025	-0.025	0.225	-0.135	0.173	-1.79e-08	0.233	-0.06	0.573	0.373	0.06
11313	LYPLA2 || lysophospholipase II (2)	0.18	0.08	-0.08	-0.345	-0.157	-0.4	0.728	-0.21	0.318	-0.437	0.21
113130	CDCA5 || cell division cycle associated 5 (1)	0.09	0.45	-0.17	-0.09	-0.18	0.017	-7.15e-09	0.34	-0.08	0.12	-0.44
113174	LOC113174 || hypothetical protein BC012010 (1)	-0.27	-0.03	0.03	0.37	0.52	0.507	-0.96	0.53	0.22	0.53	-0.53
113178	SCAMP4 || secretory carrier membrane protein 4 (1)	-0.05	0.27	0.05	-0.65	-0.44	-0.673	0.98	-0.418	2.62e-08	-0.27	-0.268
113189	D4ST1 || dermatan 4 sulfotransferase 1 (1)	5.68e-08	0.21	-0.21	0	-1	-0.823	-1.91e-08	-0.548	-0.64	-0.61	-0.298
11319	HSGT1 || suppressor of S. cerevisiae gcr2 (1)	-0.425	-0.065	0.415	0.065	0.13	0.607	-0.11	0.305	0.35	-0.05	-0.175
11321	XAB1 || XPA binding protein 1 (1)	-0.115	-0.475	0.115	0.295	-0.17	0.327	-0.42	0.275	-2.38e-09	0.33	-0.275
113235	MGC9564 || similar to RIKEN cDNA 1110002C08 gene (3)	-0.0425	0.133	0.0425	-0.552	-0.763	-0.866	-7.58e-09	-0.423	-0.543	-3.22	-0.26
113246	GRCC10 || likely ortholog of mouse gene rich cluster, C10 gene (1)	0.5	0.36	-0.36	-0.7	-0.547	0	0.263	0.297	0.153	0.543	-0.423
11328	FKBP9 || FK506 binding protein 9, 63 kDa (2)	-0.177	0.107	-0.107	0.352	0.163	5.96e-09	-0.072	-0.172	0.508	-0.362	0.172
11332	BACH || brain acyl-CoA hydrolase (3)	-0.153	0.57	0.153	-0.773	-0.937	-0.4	0.368	-0.547	-0.037	0.326	0.143
11333	PDAP1 || PDGFA associated protein 1 (2)	0.16	0.72	-0.89	-0.16	0.155	-0.358	0.305	0.14	2.62e-08	0.465	-0.14
11334	TUSC2 || tumor suppressor candidate 2 (2)	0.113	0.193	-0.113	-0.682	0.608	-0.0496	0.303	-0.17	-0.279	0.698	-0.304
11335	CBX3 || chromobox homolog 3 (HP1 gamma homolog, Drosophila) (3)	-0.455	0.015	-0.015	0.205	1.01e-09	0.09	-0.127	-0.101	0.33	-0.38	0.296
113402	C6orf83 || chromosome 6 open reading frame 83 (1)	0.115	0.305	-0.115	-0.475	-0.025	0.292	-0.405	0.54	0.025	0.555	-0.51
113419	TEX261 || testis expressed sequence 261 (1)	0.09	-0.09	0.26	-0.13	-0.61	-0.633	0.09	-1.46	-0.39	-0.39	-3.55e-08
11342	RNF13 || ring finger protein 13 (2)	-0.273	-0.417	0.273	0.463	0.093	-1.07e-08	-0.487	0.295	-0.04	0.068	-0.295
113451	ODC-p || ornithine decarboxylase-like (1)	-0.085	0.085	0.485	-0.135	-0.000825	0.0162	0.939	-0.033	-0.358	0.139	0.033
113452	BCLP || beta-casein-like protein (2)	0.24	-0.07	0.07	-0.525	-0.6	-0.123	0.54	0.015	-5.48e-08	0.05	-0.015
113655	LOC113655 || hypothetical protein BC011982 (2)	0.36	0.25	-0.25	-0.855	-0.492	4.77e-09	1.2	-0.628	-0.197	-0.162	-0.478
113675	SDSL || serine dehydratase-like (1)	1.39e-08	0.19	-0.05	0	-0.03	-0.153	1.36	-0.36	0.03	-1.42	-0.12
113763	C7orf29 || chromosome 7 open reading frame 29 (1)	-5.29e-08	-5.18e-08	0.17	-0.21	0.25	-0.423	0.35	0.245	0.05	-0.16	0.035
113791	MGC17330 || HGFL gene (1)	-0.09	-0.08	0.18	0.08	0.483	-1.12e-10	0.303	-0.325	0.173	-3.3	0.325
113829	SLC35A4 || solute carrier family 35, member A4 (1)	0.035	0.215	-0.035	-0.165	-0.33	-0.143	2.86e-08	0.172	-0.08	0.01	-0.578
113878	DTX2 || deltex homolog 2 (Drosophila) (2)	-0.06	0.06	0.16	-0.47	3.28e-09	-0.573	0.79	-0.19	-0.49	-0.48	-0.0495
1139	CHRNA7 || cholinergic receptor, nicotinic, alpha polypeptide 7 (2)	-0.315	-0.245	0.245	0.385	-0.16	-0.138	0.09	-0.202	0.27	-5.36e-09	0.202
1140	CHRNB1 || cholinergic receptor, nicotinic, beta polypeptide 1 (muscle) (1)	0.075	0.085	-0.075	-0.425	-8.64e-09	0.347	-0.19	-0.995	0.18	-2.58	0.095
114034	TOE1 || target of EGR1, member 1 (nuclear) (1)	-0.28	-0.02	0.02	0.16	-0.0267	1.24	-0.317	-0.065	0.00335	-0.0517	-0.175
114049	WBSCR22 || Williams Beuren syndrome chromosome region 22 (6)	-0.13	0.13	0.4	-0.33	-8.64e-09	0.269	-0.123	-0.0585	-0.189	0.018	-0.402
114112	TXNRD3 || thioredoxin reductase 3 (1)	-0.13	-0.14	0.13	0.43	-0.05	-0.473	-4.77e-09	-0.948	0.85	0.74	0.702
114135	LOC114135 || putative acid phosphatase (1)	0.28	0.13	-0.67	-0.13	0.18	0.137	-1.08	0.402	-2.38e-09	0.28	0.182
114327	EFHC1 || EF-hand domain (C-terminal) containing 1 (1)	-0.02	-0.2	0.29	0.02	0.08	0.187	0.17	0.482	-0.31	-0.49	-0.323
114609	TIRAP || toll-interleukin 1 receptor (TIR) domain containing adaptor protein (4)	0.609	-0.169	-0.592	0.169	-0.035	-0.77	2.62e-08	0.139	-0.833	0.495	-0.139
114659	LRRC37B || leucine rich repeat containing 37B (2)	-0.61	-0.225	0.77	0.225	0.907	0.789	-0.858	0.87	0.0675	-0.728	-0.03
1147	CHUK || conserved helix-loop-helix ubiquitous kinase (3)	-0.01	0.01	-0.57	1.2	0.1	1.03	-0.337	0.306	-0.217	0.3	-0.306
114783	LMTK3 || lemur tyrosine kinase 3 (1)	0.14	-0.06	0.06	-0.69	0.47	-0.263	0.33	0.292	-0.16	-0.45	0.262
114790	STK11IP || serine/threonine kinase 11 interacting protein (1)	0.425	0.325	-0.325	-0.735	-2.09e-09	-0.413	0.98	-0.585	-0.02	-0.78	0.225
114793	FMNL2 || formin-like 2 (1)	0.085	-0.105	-0.015	0.015	-6.26e-09	-0.113	0.22	-0.34	0.79	0.19	0.34
114799	ESCO1 || establishment of cohesion 1 homolog 1 (S. cerevisiae) (2)	0.065	-0.065	-0.16	0.28	0.253	0.15	-0.229	0.305	0.0233	-0.0117	-0.305
114804	RNF157 || ring finger protein 157 (1)	-9.98e-09	-0.48	0.23	0	-0.24	-0.133	0.65	0.158	-1.67e-08	-0.13	-0.158
114822	RHPN1 || rhophilin, Rho GTPase binding protein 1 (1)	0.04	0.2	-0.04	-0.88	-0.44	-0.768	0.95	-0.142	-0.44	-1.84	0.142
114826	SMYD4 || SET and MYND domain containing 4 (1)	0.15	-1.36e-08	-0.12	0	-0.17	-0.103	0.34	0.577	0.06	0.92	0.182
114879	OSBPL5 || oxysterol binding protein-like 5 (1)	0.18	-0.01	0.01	-1.17	0.827	-0.336	0.987	-0.148	-2.34e-08	-0.073	0.822
114880	OSBPL6 || oxysterol binding protein-like 6 (1)	2.34e-08	-0.24	0.24	0	-6.26e-09	0.037	-0.49	0.213	0.27	0.56	-0.213
114883	OSBPL9 || oxysterol binding protein-like 9 (2)	-0.165	-0.215	0.165	0.7	0.165	0.397	-0.355	1.22	0.345	2.38e-09	0.04
114884	OSBPL10 || oxysterol binding protein-like 10 (2)	-0.133	-0.217	0.133	0.417	-0.19	-0.703	-0.025	-0.388	0.025	-1.4	-0.158
114885	OSBPL11 || oxysterol binding protein-like 11 (1)	0.025	-0.185	-0.025	0.655	-8.64e-09	-0.093	-0.64	0.345	0.39	0.32	-0.345
114907	FBXO32 || F-box protein 32 (3)	0.005	0.29	-0.005	-0.285	-1.1e-08	0.43	-0.11	-0.003	-0.013	-0.03	-0.283
114915	TIGA1 || TIGA1 (1)	0.045	-0.015	-0.215	0.015	-0.145	1.05	0.92	0.332	-0.495	0.82	-0.332
114926	LOC114926 || hypothetical protein BC013035 (1)	0.05	0.12	-0.05	-0.3	-0.17	0.067	0.12	0.37	-0.09	2.2e-08	-0.37
114971	PTPMT1 || protein tyrosine phosphatase, mitochondrial 1 (3)	0.215	0.148	-0.148	-0.415	0.006	-1e-08	-0.057	0.025	0.243	-0.041	-0.025
114984	LOC114984 || hypothetical protein BC014089 (1)	0.32	0.57	-0.32	-1.25	-0.037	1.07e-08	1.43	-0.19	0.453	-0.487	0.19
114991	ZNF618 || zinc finger protein 618 (1)	0.335	0.015	-0.165	-0.015	0.16	0.147	0.29	0.347	-2.62e-08	-1.36	-0.263
115024	MGC20781 || hypothetical protein MGC20781 (3)	-0.286	0.0325	0.591	-0.0325	-1.06	-1.74e-08	0.32	0.0525	-0.167	0.505	0.915
115098	LOC115098 || hypothetical protein BC013949 (1)	0.16	0.31	-0.16	-0.81	-0.32	-0.083	0.4	-1.28	-1.19e-08	-1.09	-3.07e-08
115106	CCDC5 || coiled-coil domain containing 5 (spindle associated) (2)	-0.357	-0.163	0.163	0.163	0.603	0.529	-0.752	-0.195	0.163	0.0475	0.195
115123	MARCH3 || membrane-associated ring finger (C3HC4) 3 (1)	-0.405	-0.395	0.465	0.395	-0.392	-0.145	-0.142	-0.343	0.0883	0.188	-0.273
115201	APG4A || APG4 autophagy 4 homolog A (S. cerevisiae) (2)	-0.755	-0.15	0.15	0.605	-0.12	0.507	-0.947	-0.789	2.15e-08	0.26	0.731
115207	KCTD12 || potassium channel tetramerisation domain containing 12 (2)	-0.05	0.05	-2.69	0.51	-0.22	-0.373	-0.63	0.5	-0.06	0.51	-0.5
115290	FBXO17 || F-box protein 17 (2)	-0.0325	0.0225	-0.0225	0.0875	-0.385	-0.628	0.635	-0.315	1.19e-08	-0.095	0.265
1153	CIRBP || cold inducible RNA binding protein (3)	-0.01	0.48	-0.15	0.01	0.293	-8.34e-09	0.443	0.215	0.51	0.848	-0.215
115353	LRRC42 || leucine rich repeat containing 42 (1)	-0.075	0.025	0.415	-0.025	-0.09	-0.073	-0.55	0.16	2.15e-08	-0.22	-0.16
115426	UHRF2 || ubiquitin-like, containing PHD and RING finger domains, 2 (2)	-0.35	-0.175	0.175	0.26	0.0433	0.235	0.118	0.145	-0.395	0.338	-0.085
1155	CKAP1 || cytoskeleton associated protein 1 (1)	0.145	0.425	-0.145	-0.975	-1.2	-0.462	0.471	-1.3	-0.569	-0.628	-1.4
115509	ZNF689 || zinc finger protein 689 (1)	-0.33	-0.33	0.33	0.83	-0.22	-0.363	0.17	-0.953	0.19	-3.04e-08	-0.283
115548	FCHO2 || FCH domain only 2 (1)	0.11	-0.11	-0.36	0.26	0.57	-0.013	-0.22	0.185	-0.02	5.96e-10	-0.185
115703	SNX26 || sorting nexin 26 (1)	-0.095	0.095	0.345	-0.635	0.468	-1.19	0.758	-0.07	-0.0316	-3.01	0.07
115704	EVI5L || ecotropic viral integration site 5-like (1)	0.09	0.04	-0.04	-1.53	0.71	-0.093	1.41	0.245	-5.96e-09	-0.15	-0.245
115827	RAB3C || RAB3C, member RAS oncogene family (1)	-3.13e-09	0.26	-0.41	0	1.19e-09	0.377	-0.76	0.47	0.22	-0.17	-0.47
1159	CKMT1B || creatine kinase, mitochondrial 1B (2)	0.117	0.0725	-0.0725	-0.302	-0.09	0.187	2.09e-09	0.325	0.63	0.36	0.065
116028	MGC24665 || hypothetical protein MGC24665 (1)	-0.17	0.01	0.14	-0.01	-0.16	0.127	0.33	-0.22	-1.91e-08	-0.07	0.3
116068	LOC116068 || hypothetical protein LOC116068 (2)	-0.145	-0.005	0.005	0.485	-0.045	0.162	-0.2	0.665	-0.44	0.225	-0.665
116115	ZNF526 || zinc finger protein 526 (3)	1.97	0.618	-0.618	-0.969	-0.102	-0.596	0.525	-0.322	-0.105	0.802	0.322
116150	C6orf68 || chromosome 6 open reading frame 68 (2)	-0.22	-0.36	0.285	0.22	0.338	-0.155	-1.22	0.323	-0.472	-0.152	-0.323
116151	C20orf108 || chromosome 20 open reading frame 108 (1)	-0.74	-0.36	0.64	0.36	-1.82e-08	0.332	-0.39	0.037	0.81	0.41	0.487
116225	ZMYND19 || zinc finger, MYND domain containing 19 (2)	0.58	0.83	-0.58	-0.61	0.13	0.187	0.42	-0.142	0.445	-0.45	0.142
116238	LOC116238 || hypothetical protein BC014072 (1)	0.2	0.12	-0.12	-0.34	-0.789	-0.0823	0.231	0.265	-0.239	0.131	-0.345
1163	CKS1B || CDC28 protein kinase regulatory subunit 1B (2)	0.175	0.035	-0.035	-0.355	-0.237	-5.13e-08	0.223	-0.613	-0.157	0.233	0.252
116447	TOP1MT || topoisomerase (DNA) I, mitochondrial (1)	0.755	0.405	-1.56	-0.405	0.3	0.077	0.32	-0.195	0.22	-0.55	0.195
116540	MRPL53 || mitochondrial ribosomal protein L53 (1)	0.305	0.165	-0.165	-0.705	-0.15	-0.023	0.23	-0.35	2.98e-10	0.04	0.35
116832	RPL39L || ribosomal protein L39-like (1)	0.495	0.565	-0.495	-0.805	-0.5	-0.223	-0.09	-0.738	-0.04	0.02	-0.278
116840	LIP8 || LYST-interacting protein LIP8 (1)	0.185	0.015	-0.015	-0.275	-4.47e-10	-0.373	0.71	0.472	-0.03	0.08	-0.308
116841	IMAGE3451454 || SVAP1 protein (2)	0.0875	0.163	-0.0875	-0.588	-0.652	-2.98e-09	0.008	1.79e-08	0.003	-0.022	2.65e-08
116843	C6orf192 || chromosome 6 open reading frame 192 (1)	0.055	-0.025	0.025	-0.665	-0.24	0.007	-0.54	0.615	-0.07	0.15	-0.615
116936	RNU86 || RNA, U86 small nucleolar (1)	-0.04	0.41	0.04	-0.47	-0.44	0.507	0.2	-0.475	-0.52	-5.96e-09	-0.375
116969	ART5 || ADP-ribosyltransferase 5 (1)	0.545	0.535	-0.535	-0.925	-1.82e-08	-0.473	0.25	0.095	-0.195	-1.34	-0.13
116985	CENTD2 || centaurin, delta 2 (2)	0.015	0.155	-0.015	-0.705	0.06	-0.293	0.76	-0.42	0	-0.605	0.42
117143	STAF42 || SPT3-associated factor 42 (1)	-0.105	-0.305	0.205	0.105	0.04	0.517	-0.04	0.66	0.81	0.57	-0.1
117145	CTMP || C-terminal modulator protein (1)	0.02	0.04	-0.02	-0.11	0.145	-0.023	-0.58	-0.04	0.52	-1.01e-08	0.04
1173	AP2M1 || adaptor-related protein complex 2, mu 1 subunit (1)	0.03	0.1	-0.14	-0.03	-0.6	-0.213	0.05	-2.03e-08	-0.32	-0.25	-1.16e-08
1174	AP1S1 || adaptor-related protein complex 1, sigma 1 subunit (3)	0.44	0.57	-0.44	-1.4	-0.222	5.96e-10	0.638	0.167	1.01	0.698	1.83
1175	AP2S1 || adaptor-related protein complex 2, sigma 1 subunit (3)	0.195	0.145	-0.145	-0.525	-0.962	2.03e-08	-0.232	-0.315	-0.262	0.088	-0.015
117581	TWIST2 || twist homolog 2 (Drosophila) (1)	0.425	0.015	-0.015	-0.585	-0.14	-0.503	0.39	-0.993	0.41	-8.94e-09	0.137
1176	AP3S1 || adaptor-related protein complex 3, sigma 1 subunit (1)	1.15e-08	-0.13	0.3	0	-0.437	-6.56e-09	-1.26	-0.005	-0.027	1.33	0.33
118	ADD1 || adducin 1 (alpha) (3)	-0.125	0.125	-1.5	0.595	0.025	0.082	0.363	-0.021	-0.125	-0.025	-0.261
1181	CLCN2 || chloride channel 2 (1)	0.225	0.115	-0.115	-0.315	0.05	-0.023	0.31	-0.08	4.47e-10	-7.44	0.08
1182	CLCN3 || chloride channel 3 (3)	-0.055	-0.225	0.055	0.175	-0.087	0.224	0.1	0.186	0.67	0.617	-0.034
118424	UBE2J2 || ubiquitin-conjugating enzyme E2, J2 (UBC6 homolog, yeast) (3)	-0.0375	0.0375	0.343	-0.425	0.128	-4.77e-09	0.188	-0.394	-0.425	-0.097	0.0625
118432	RPL29P2 || ribosomal protein L29 pseudogene 2 (1)	0.7	0.26	-0.26	-0.42	2.47e-08	0.427	-0.04	0.947	0.67	0.8	0.187
118472	ZNF511 || zinc finger protein 511 (2)	-0.055	0.065	0.055	-0.785	-0.177	2.38e-09	1.2	0.01	0.038	-0.052	-0.01
118487	CHCHD1 || coiled-coil-helix-coiled-coil-helix domain containing 1 (2)	0.565	0.365	-0.385	-0.365	-0.102	2.98e-09	-0.407	-0.133	0.793	0.628	0.133
1185	CLCN6 || chloride channel 6 (13)	0.36	-0.06	0.06	-0.4	-0.335	0.137	0.37	-0.0195	-0.363	1.13e-08	0.0195
1186	CLCN7 || chloride channel 7 (2)	-0.04	0.04	0.275	-1.51	-0.065	-0.368	1.75	-0.158	-0.095	5.96e-10	0.158
118812	C10orf83 || chromosome 10 open reading frame 83 (1)	0.455	0.185	-0.185	-0.235	0.0265	-0.0265	-0.153	0.0495	-0.139	0.467	-0.15
118813	ZFYVE27 || zinc finger, FYVE domain containing 27 (1)	0.265	0.275	-0.265	-0.835	0.0984	-0.465	0.798	0.225	0.0184	-0.292	0.125
118945	na || similar to Cathepsin L, preproprotein (1)	0.19	2.93e-08	-1.23	0	0.548	0.245	-0.242	-0.218	0.538	-0.342	0.122
118980	SFXN2 || sideroflexin 2 (3)	-0.142	-0.0275	0.968	0.0275	-6.86e-09	-0.028	0.402	0.108	-0.142	-0.015	-0.294
118987	PDZK8 || PDZ domain containing 8 (1)	-0.835	-0.445	0.515	0.445	0.9	0.687	-0.46	-0.193	-0.08	-2.81	-0.623
119	ADD2 || adducin 2 (beta) (1)	0.235	-0.235	-0.305	0.265	-0.3	-0.603	-2.38e-09	-0.905	0.21	-1.32	0.02
119016	CTGLF1 || centaurin, gamma-like family, member 1 (2)	0.065	0.555	-0.065	-0.445	0.813	-4.17e-08	-0.297	1.1	-0.517	-1.02	0.175
119032	C10orf32 || chromosome 10 open reading frame 32 (2)	-0.0025	0.0025	0.273	-0.107	0.15	-0.033	-1.07	0.383	0.225	0.32	0.113
1191	CLU || clusterin (complement lysis inhibitor, SP-40,40, sulfated glycoprotein 2, testosterone-repressed prostate message 2, apolipoprotein J) (2)	0.268	0.233	-0.752	-0.233	-0.245	-1.16	0.315	-0.475	0.19	-3.58e-09	-0.1
1195	CLK1 || CDC-like kinase 1 (2)	-0.465	-0.345	0.345	0.64	0.505	0.852	-0.425	0.38	-0.365	0.025	-0.38
119504	C10orf104 || chromosome 10 open reading frame 104 (2)	0.0175	0.0875	-0.0175	-0.568	0.495	0.187	-0.57	0.818	0.18	0.245	-0.117
119559	SFXN4 || sideroflexin 4 (1)	0.135	0.025	-0.025	-0.725	1.04e-08	0.197	0.15	0.245	0.78	0.58	-0.005
119710	LOC119710 || hypothetical protein BC009561 (2)	0.145	0.435	-0.335	-0.145	0.848	1.01	-0.122	0.0725	0.608	-0.0117	-0.0725
1198	CLK3 || CDC-like kinase 3 (2)	-0.492	-0.158	0.328	0.158	-0.205	0.732	0.655	-0.453	-0.0117	0.705	0.453
120	ADD3 || adducin 3 (gamma) (5)	4.32e-09	5.44e-09	-0.19	0.895	2.95e-08	-0.119	-0.43	0.164	0.234	-0.32	-0.164
1200	TPP1 || tripeptidyl peptidase I (2)	0.0875	0.133	-0.263	-0.0875	-0.31	-0.283	2.86e-08	-0.223	-0.115	-0.43	-0.663
120071	GYLTL1B || glycosyltransferase-like 1B (1)	-0.205	0.215	0.205	-0.865	-0.18	-0.713	1	-0.573	-0.13	-0.55	-0.323
1201	CLN3 || ceroid-lipofuscinosis, neuronal 3, juvenile (Batten, Spielmeyer-Vogt disease) (2)	-0.0175	0.0175	0.107	-1.26	-0.695	-0.088	0.375	0.04	-0.085	0.17	-0.3
120103	SLC36A4 || solute carrier family 36 (proton/amino acid symporter), member 4 (1)	-0.52	-0.4	0.4	0.55	0.4	-0.313	-0.36	-0.473	0.33	1.49e-09	0.107
120227	CYP2R1 || cytochrome P450, family 2, subfamily R, polypeptide 1 (1)	-0.15	7.82e-09	0.25	5.81e-09	-0.117	5.36e-08	-0.067	0.155	0.233	0.143	-0.155
120318	na || similar to 40S ribosomal protein S6 (Phosphoprotein NP33) (1)	0.3	0.28	-1.13	-0.28	0.49	0.667	-1.22	0.13	0.17	-0.16	-0.13
120526	ZCSL3 || zinc finger, CSL domain containing 3 (1)	0.12	0.14	-0.12	-0.54	0.19	0.307	-1.08	0.395	-0.37	0.1	-0.395
1207	CLNS1A || chloride channel, nucleotide-sensitive, 1A (2)	-0.443	-0.0125	0.278	0.0125	-9.84e-09	0.582	0.175	-0.708	-0.095	0.185	0.202
121053	MGC40397 || hypothetical protein MGC40397 (1)	3.29e-08	0.16	-0.18	0	1.09	1.21	-0.15	0.545	1.35	1.39	0.165
121054	na || similar to Keratin, type I cytoskeletal 18 (Cytokeratin 18) (K18) (CK 18) (1)	-0.04	0.28	0.04	-1.31	3.9e-08	-0.123	0.42	-0.71	-0.41	-0.47	-0.06
1211	CLTA || clathrin, light polypeptide (Lca) (2)	-0.0925	0.233	0.0925	-0.507	-0.105	0.627	-0.095	-0.173	0.1	0.39	-0.673
121260	SLC15A4 || solute carrier family 15, member 4 (1)	-0.185	0.125	0.095	-0.095	-0.067	-5.96e-09	-0.517	0.532	-0.247	-0.257	-0.808
121268	RHEBL1 || Ras homolog enriched in brain like 1 (1)	-5.77e-08	-0.26	0.51	0	-0.207	-1.79e-08	0.243	-0.21	0.153	0.233	0.21
1213	CLTC || clathrin, heavy polypeptide (Hc) (1)	-0.525	-0.335	0.335	0.345	0.78	0.687	-0.85	0.36	-0.75	-0.02	0.23
121441	NEDD1 || neural precursor cell expressed, developmentally down-regulated 1 (1)	0.06	-0.06	-0.19	0.1	0.14	-0.053	-0.46	0.725	0.2	-1.49e-09	-0.235
121457	IKIP || IKK interacting protein (2)	-0.393	-0.273	0.273	0.578	0.885	0.797	-0.085	0.278	0.625	0.56	-0.278
121536	AEBP2 || AE binding protein 2 (1)	-0.05	-0.11	0.13	0.05	0.318	-0.00465	0.338	-1.08	-0.00165	-0.542	-0.14
121642	MGC90512 || similar to hypothetical protein 9530023G02 (1)	0.055	-0.055	0.065	-0.495	-0.03	0.007	0.43	-0.67	0.21	-0.29	0.06
122060	FLJ30046 || hypothetical protein FLJ30046 (1)	0.025	-0.025	0.215	-0.225	0.083	-2.03e-08	-0.217	0.8	-0.057	0.293	-0.46
122416	ANKRD9 || ankyrin repeat domain 9 (1)	0.515	0.315	-0.315	-0.745	-0.61	-0.373	1.24	0.114	-0.33	-3.99e-08	-0.196
122509	FAM14B || family with sequence similarity 14, member B (1)	0.76	0.51	-0.51	-1	0.32	-0.053	0.44	-0.613	5.01e-08	-0.11	-0.133
122704	MRPL52 || mitochondrial ribosomal protein L52 (2)	0.515	0.28	-0.28	-0.53	-0.155	0.052	-0.425	-0.188	0.28	0.58	0.188
122769	PPIL5 || peptidylprolyl isomerase (cyclophilin)-like 5 (4)	-0.229	-0.211	0.211	0.421	-0.62	-0.59	5.48e-08	-0.117	0.03	1.16	0.626
122809	SOCS4 || suppressor of cytokine signaling 4 (1)	0.075	-0.075	0.085	-0.315	0.42	-1.18	0.2	0.135	-0.135	0.59	-0.135
122830	C14orf35 || chromosome 14 open reading frame 35 (2)	-0.615	-0.665	0.615	0.815	-0.0333	0.0687	0.242	0.474	-0.173	-0.0683	-0.591
122961	HBLD1 || HESB like domain containing 1 (1)	0.115	-0.115	0.205	-0.295	2.71e-08	-0.003	0.5	-0.245	0.02	-0.46	0.245
123	ADFP || adipose differentiation-related protein (1)	-0.61	-0.42	0.42	0.45	-0.32	0.487	-0.21	-0.243	-0.13	0.1	-0.503
123016	TTC8 || tetratricopeptide repeat domain 8 (2)	-0.425	-0.365	0.575	0.365	-6.26e-09	0.332	-0.57	0.09	0.085	-0.455	-0.09
123036	MTAC2D1 || membrane targeting (tandem) C2 domain containing 1 (2)	0.065	-0.105	-0.065	0.955	-0.215	-0.308	1.35	0.223	8.34e-09	0.24	-0.223
123169	LOC123169 || senescence downregulated leo1-like (1)	-0.025	0.025	-0.935	1	0.27	0.017	-4.53e-08	-0.348	0.63	-1.39	0.312
123346	LOC123346 || hypothetical protein LOC123346 (1)	1.14e-07	0.01	-0.11	0	-0.8	-0.003	0.6	-0.365	4.53e-08	0.46	0.365
123355	LRRC28 || leucine rich repeat containing 28 (1)	0.31	-0.02	0.02	-0.37	-0.52	-0.423	0.22	-0.108	-0.19	-0.48	-0.568
123720	KIAA1971 || similar to junction-mediating and regulatory protein p300 JMY (1)	-0.155	-0.145	0.335	0.145	-0.017	1.19e-09	-0.797	0.055	-0.057	0.233	-0.055
123803	NTAN1 || N-terminal asparagine amidase (2)	-0.095	-0.035	0.415	0.035	-0.1	-0.373	-0.41	0.002	0.4	-5.42e-08	-0.298
123811	FLJ31153 || hypothetical protein FLJ31153 (2)	0.142	-0.412	0.0775	-0.0775	0.86	0.792	-0.07	-0.108	0.62	1.06	0.512
123920	CKLFSF3 || chemokine-like factor super family 3 (1)	0.285	0.345	-0.285	-0.765	-0.207	-1.55e-08	0.083	0.577	-0.057	-0.077	-0.473
124044	MGC26885 || hypothetical protein MGC26885 (1)	-0.13	9.6e-08	0.19	0	-0.51	-0.703	1.39	0.075	-0.13	5.96e-10	-0.075
124245	LOC124245 || hypothetical protein BC001584 (2)	0.158	0.138	-0.362	-0.138	0.785	-0.098	1.78	-0.112	-2.38e-09	-0.245	0.112
124401	KIAA1977 || KIAA1977 protein (1)	0.605	0.605	-0.715	-0.605	0.408	-0.385	0.678	-0.195	-0.382	-0.722	0.195
124402	LOC124402 || LOC124402 (2)	0.11	0.27	-0.11	-0.87	-0.775	-0.653	0.87	-0.35	-5.01e-08	-0.28	0.35
124446	LOC124446 || hypothetical protein BC017488 (1)	0.53	0.3	-0.3	-0.9	-0.59	-0.503	-1.43e-08	-5.96e-09	0.21	0.2	0.96
124454	KIAA1970 || KIAA1970 protein (2)	-0.545	-0.095	0.095	0.22	0.035	-0.188	-0.235	-0.268	4.77e-09	-0.7	0.268
124491	LOC124491 || LOC124491 (1)	0.325	-0.015	-0.055	0.015	-0.047	-3.35e-10	0.123	0.21	0.263	0.273	-0.21
124512	LOC124512 || hypothetical protein LOC124512 (2)	0.207	0.388	-0.207	-0.973	-0.06	0.062	-0.025	-0.107	-0.325	-1.79e-09	0.107
124565	MGC15523 || hypothetical protein MGC15523 (1)	0.27	0.28	-0.27	-0.91	-0.42	-0.743	0.83	0.105	3.28e-09	-5.99	-0.105
124637	FLJ32499 || hypothetical protein FLJ32499 (1)	-0.44	-0.27	0.27	0.28	0.08	0.257	-0.09	-0.298	-0.06	-1.2	-0.148
124685	na || similar to Myosin light polypeptide 6 (Myosin light chain alkali 3) (Myosin light chain 3) (MLC-3) (LC17) (1)	0.49	0.63	-0.49	-0.92	-0.71	0.187	-0.73	0.337	-0.61	1.49e-09	-0.903
124801	FLJ30656 || hypothetical protein FLJ30656 (3)	-0.296	0.001	0.414	-0.001	0.013	-0.093	3.58e-09	0.642	0.45	0.027	-0.168
124808	FLJ31795 || hypothetical protein FLJ31795 (1)	-0.115	-0.195	0.115	0.775	0.39	0.197	-0.26	0.297	0.58	6.56e-09	0.067
124944	MGC49942 || hypothetical protein MGC49942 (2)	0.482	0.443	-0.443	-0.502	-0.0817	0.53	0.823	0.107	0.523	0.583	0.237
124997	FLJ33817 || hypothetical protein FLJ33817 (1)	-4.02e-09	0.16	-0.41	0	-0.1	-0.653	0.92	-0.013	-0.86	-0.66	-0.033
125050	RN7SK || RNA, 7SK, nuclear (1)	0.86	0.76	-0.76	-0.99	-0.91	0.077	1.65	0.945	-0.12	3.58e-09	0.065
125058	TBC1D16 || TBC1 domain family, member 16 (1)	0.07	0.33	-0.09	-0.07	-0.03	-0.173	0.15	0.0175	0.03	-0.4	-0.0175
125061	AFMID || arylformamidase (2)	-0.465	-0.01	0.23	0.01	0.066	0.555	-1e-08	-0.033	-0.214	-0.277	0.033
125144	MGC40157 || hypothetical protein MGC40157 (2)	0.28	0.275	-0.275	-0.635	-0.005	0.482	0.005	0.565	0.945	1.15	0.545
125150	LOC125150 || hypothetical protein LOC125150 (1)	0.3	0.21	-0.21	-0.38	0.72	0.207	-0.13	-0.623	0.42	-0.21	0.197
125476	C18orf37 || chromosome 18 open reading frame 37 (5)	0.0715	0.124	-0.0715	-0.301	-1.13e-09	-0.003	-0.706	-0.115	0.076	0.066	0.115
125919	ZNF543 || zinc finger protein 543 (1)	0.01	-0.55	5.39e-08	0	0.579	0.226	-0.611	0.042	-0.411	0.639	-0.088
125950	RAVER1 || RAVER1 (2)	0.253	0.142	-0.142	-0.438	-0.61	-0.888	0.18	-0.27	-0.29	-0.56	0.27
125988	QIL1 || QIL1 protein (2)	0.525	0.205	-0.205	-0.89	-0.342	7.15e-09	0.868	0.067	0.098	0.263	0.387
126003	TRAPPC5 || trafficking protein particle complex 5 (1)	0.49	0.24	-0.24	-0.56	-0.44	-0.223	1.33	-0.295	0.05	-1.49e-09	0.265
126074	FLJ35119 || hypothetical protein FLJ35119 (1)	-3.86e-08	-0.06	0.07	0	-0.47	-0.003	1.01	-0.578	-0.17	2.2e-08	-0.188
126119	SBBI54 || hypothetical transmembrane protein SBBI54 (2)	0.2	0.27	-0.2	-0.22	-0.63	-0.443	0.69	-0.748	-0.28	-0.72	0.422
126129	CPT1C || carnitine palmitoyltransferase 1C (1)	0.2	0.4	-0.2	-1.31	0.37	0.177	-4.47e-10	-0.075	0.57	0.11	0.145
126133	ALDH16A1 || aldehyde dehydrogenase 16 family, member A1 (1)	-0.105	0.235	0.105	-0.845	0.22	-0.423	2.21	-0.525	2.38e-09	-0.13	0.525
126170	na || similar to peptidyl-Pro cis trans isomerase (1)	-0.105	-0.135	0.155	0.105	-0.227	1.79e-08	0.093	0.13	0.343	0.623	0.45
126208	LOC126208 || hypothetical protein LOC126208 (1)	0.27	0.18	-0.18	-1.17	-0.355	-0.433	1.03	-0.133	-1.19e-09	-0.19	0.133
126295	LOC126295 || hypothetical protein LOC126295 (1)	-0.235	-0.375	0.465	0.235	0.03	-0.123	-0.94	-0.383	0.19	0.62	0.287
1263	PLK3 || polo-like kinase 3 (Drosophila) (1)	-0.055	0.035	0.205	-0.035	0.52	-0.153	0.64	-0.045	2.62e-08	-0.44	0.025
126308	MOBKL2A || MOB1, Mps One Binder kinase activator-like 2A (yeast) (1)	0.235	0.095	-0.095	-0.545	-0.27	-0.513	-0.18	0.175	0.46	-2.98e-09	-0.175
126321	C19orf28 || chromosome 19 open reading frame 28 (2)	-0.19	0.19	0.32	-1.48	-0.277	-5.36e-09	0.263	-0.0975	-0.717	-0.077	0.0975
126364	LRRC25 || leucine rich repeat containing 25 (1)	0.105	0.205	-0.105	-0.655	-2.06e-08	-0.353	0.51	-1.08	-0.02	-0.82	0.127
126382	TRA16 || TR4 orphan receptor associated protein TRA16 (2)	0.0375	0.0475	-0.0375	-0.677	-0.331	4.17e-10	0.579	-0.457	-0.199	-0.547	-0.264
126402	FLJ40365 || hypothetical protein FLJ40365 (1)	-0.065	-0.075	0.105	0.065	-0.42	-0.423	0.58	-0.3	-0.08	-0.78	0.24
1265	CNN2 || calponin 2 (5)	0.227	0.169	-0.169	-0.286	-0.0717	0.192	0.335	-0.195	0.005	0.54	0.195
1266	CNN3 || calponin 3, acidic (1)	0.005	-0.145	0.065	-0.005	-0.43	-1.14	-0.65	-0.753	0.15	0.4	0.027
126661	LOC126661 || hypothetical protein LOC126661 (2)	0.372	0.263	-0.667	-0.263	-0.97	-0.413	0.1	-0.375	-0.05	-0.96	-0.185
126792	B3GALT6 || UDP-Gal:betaGal beta 1,3-galactosyltransferase polypeptide 6 (1)	0.26	0.45	-0.26	-0.29	0.26	-0.203	0.63	-0.743	0.45	-0.09	0.597
126917	LOC126917 || hypothetical protein LOC126917 (2)	0.78	0.45	-0.45	-0.82	0.765	-0.733	0.33	0.047	0.35	-5.45	-0.043
127018	LYPLAL1 || lysophospholipase-like 1 (2)	-0.525	-0.205	0.205	0.34	0.645	0.852	-1.31e-08	0.152	1.65	1.96	0.318
127253	LOC127253 || hypothetical protein BC009514 (2)	0.24	-0.24	-1.39	0.84	0.438	0.389	-1.52	0.296	1.07	-0.115	-0.0335
127262	LOC127262 || hypothetical protein LOC127262 (1)	-0.24	-0.28	0.24	0.48	-0.375	0.217	0.32	0.0325	0.5	0.33	-0.263
127281	MGC26818 || hypothetical protein MGC26818 (1)	0.2	0.39	-0.2	-1.26	0.238	-0.325	0.598	-0.803	0.138	-0.722	0.827
127428	C1orf83 || chromosome 1 open reading frame 83 (1)	6.11e-09	-0.14	0.57	0	3.28e-09	0.637	-0.625	0.0985	0.08	1.12	-0.281
127550	LOC127550 || similar to iGb3 synthase (1)	0.58	0.31	-0.31	-0.93	-0.03	0.357	0.51	0.817	0.57	0.43	0.117
127557	ZBTB8 || zinc finger and BTB domain containing 8 (1)	-0.09	-0.31	0.34	0.09	0.22	0.227	-0.41	-0.303	0.54	-0.29	0.017
127687	FLJ45459 || FLJ45459 protein (2)	0.302	0.383	-0.302	-0.998	-0.31	-0.338	1.05	-0.185	-5.96e-10	0.195	0.185
127700	NOR1 || oxidored-nitro domain-containing protein (5)	-0.341	-0.202	0.676	0.202	0.362	0.565	-0.112	0.15	0.508	0.435	0.09
128	ADH5 || alcohol dehydrogenase 5 (class III), chi polypeptide (4)	-0.2	-0.25	0.22	0.2	-0.275	0.402	-0.595	-0.0585	7.15e-09	0.272	0.0585
128077	LIX1L || Lix1 homolog (mouse) like (1)	-0.055	-0.105	0.365	0.055	-0.077	-2.38e-09	-0.087	0.275	0.753	0.123	-0.275
128229	SSTK-IP || SSTK-interacting protein (1)	0.34	2.21e-08	-0.17	0	-0.32	0.007	0.09	-0.82	-0.1	5.96e-10	0.39
128240	APOA1BP || apolipoprotein A-I binding protein (2)	0.425	0.145	-0.145	-0.65	6.86e-09	-0.058	0.665	-0.173	0.855	0.6	0.327
128322	na || similar to Nuclear transport factor 2 (NTF-2) (1)	0.01	-0.01	0.27	-0.52	-1.1	-0.373	0.11	-0.433	-0.29	-0.13	-1.02
128439	LOC128439 || hypothetical gene LOC128439 (1)	0.2	0.4	-0.2	-0.47	-0.34	0.247	1.22	0.095	0.13	-0.04	-0.577
128637	TBC1D20 || TBC1 domain family, member 20 (1)	-0.65	-0.26	0.31	0.26	0.11	0.497	4.53e-08	-0.755	-0.26	-0.51	-0.245
1287	COL4A5 || collagen, type IV, alpha 5 (Alport syndrome) (1)	0.51	-0.04	-0.5	0.04	1.07	0.197	1.03	0.605	0.68	-1.26	0.425
128869	CDC91L1 || CDC91 cell division cycle 91-like 1 (S. cerevisiae) (2)	0.03	0.08	-0.03	-0.91	-0.63	0.037	0.215	-0.0355	-0.08	-0.06	-0.231
128977	LOC128977 || hypothetical protein LOC128977 (1)	0.36	0.91	-0.36	-0.63	0.62	0.737	-0.85	1.08	0.22	-0.22	-0.125
128989	DKFZp761P1121 || hypothetical protein DKFZp761P1121 (2)	0.28	-0.2	0.2	-0.205	-1.49e-09	-0.573	0.63	-0.0375	0.105	-0.37	0.0375
1291	COL6A1 || collagen, type VI, alpha 1 (1)	0.615	0.415	-0.415	-0.585	0.42	-0.473	0.3	0.092	-0.23	-1	0.312
129138	LOC129138 || hypothetical protein BC014641 (2)	-0.552	0.203	0.237	-0.203	-0.367	1.43e-08	0.988	-0.188	-0.187	-1.18	0.188
129401	NUP35 || nucleoporin 35kDa (3)	-0.169	-0.151	0.151	0.236	-0.0367	0.55	-0.117	0.972	0.0134	0.543	-0.421
129450	FLJ37953 || hypothetical protein FLJ37953 (2)	-0.468	-0.333	0.333	1.86	0.51	0.582	-0.615	0.107	5.96e-09	0.095	-0.107
129530	LOC129530 || hypothetical protein LOC129530 (1)	0.03	-0.03	0.77	-0.08	0.358	0.345	0.0284	0.48	-0.0717	-0.0717	-0.25
129531	LOC129531 || hypothetical protein BC018453 (1)	-0.28	-0.16	0.41	0.16	0.94	0.557	-0.23	0.06	0.48	1.01e-08	0.41
129563	MGC42174 || hypothetical protein MGC42174 (1)	0.26	0.24	-0.24	-0.71	0.01	-0.653	1.26	-0.18	-9.54e-09	-0.99	0.18
129642	OACT2 || O-acyltransferase (membrane bound) domain containing 2 (3)	-0.661	-0.382	0.382	0.854	-0.122	1.79e-08	-0.177	-0.127	0.938	0.278	0.127
129787	TMEM18 || transmembrane protein 18 (1)	-0.04	0.04	0.21	-0.12	-5.22e-10	0.317	-0.06	0.067	0.78	-0.29	0.542
129831	DRB1 || developmentally regulated RNA-binding protein 1 (1)	-0.33	0.1	0.41	-0.1	-1.79e-09	0.257	-0.33	0.622	0.43	-0.28	-0.738
130355	LOC130355 || hypothetical protein LOC130355 (1)	0.25	0.6	-0.4	-0.25	0.518	0.535	-0.292	0.71	0.368	-0.202	0.14
130429	na || similar to 40S ribosomal protein SA (p40) (34/67 kDa laminin receptor) (Colon carcinoma laminin-binding protein) (NEM/1CHD4) (Multidrug resistance-associated protein MGr1-Ag) (1)	0.05	-0.05	0.09	-0.29	-0.025	0.732	0.025	0.075	-0.515	0.085	0.015
130502	LOC130502 || similar to CG14894-PA (1)	-0.06	-0.08	0.35	0.06	0.411	0.199	-0.859	0.257	-0.199	-0.898	0.097
130557	ZNF513 || zinc finger protein 513 (1)	0.125	0.035	-0.035	-0.535	0.248	-0.565	0.828	-0.07	-0.0416	-0.612	0.07
130612	MGC99813 || similar to RIKEN cDNA A230078I05 gene (1)	-0.09	0.12	-2.71e-08	0	-0.0935	0.0535	1.4	-0.14	-0.0535	-0.243	0.14
130617	LOC130617 || hypothetical protein BC018415 (3)	0.11	0.446	-0.11	-1.37	-0.413	0.007	1.25	-0.0665	5.24e-09	-1.02	-0.646
130678	na || similar to 60S acidic ribosomal protein P1 (1)	-0.26	-4.22e-08	0.02	0	-1.06	-1.79e-08	0.363	0.62	-0.797	0.103	-0.66
130773	na || similar to 60S ribosomal protein L23a (1)	0.375	0.725	-0.425	-0.375	-0.08	0.507	-0.87	0.882	-1.43e-08	0.4	-0.428
130814	C2orf22 || chromosome 2 open reading frame 22 (2)	-0.1	0.035	0.04	-0.035	-0.302	-4.77e-09	0.503	-0.3	-0.072	0.893	0.3
130865	na || similar to 60S ribosomal protein L26-like 1 (1)	0.11	0.33	-0.73	-0.11	0.83	0.777	-1.67	0.695	-1.67e-08	0.27	1.11
130888	FBXO36 || F-box protein 36 (1)	-0.035	0.035	0.365	-0.405	0.35	0.367	-0.35	0.0545	-0.345	5.96e-10	-0.256
131076	LOC131076 || hypothetical LOC131076 (1)	-0.135	0.175	-0.075	0.075	0.4	0.087	-0.15	-0.01	0.26	0.37	0.4
1312	COMT || catechol-O-methyltransferase (3)	-0.738	-0.0175	0.0925	0.0175	-0.77	-0.146	0.75	-0.71	-0.403	-0.28	-0.15
1314	COPA || coatomer protein complex, subunit alpha (1)	-2.24e-10	8.94e-10	-0.32	0	0.14	-0.033	0.07	0.54	-0.51	-6.56e-09	0.12
131408	MGC21688 || hypothetical protein MGC21688 (1)	0.21	0.66	-0.21	-0.84	1.52e-08	-0.643	0.2	-0.448	-0.22	-1.2	-0.068
131474	CHCHD4 || coiled-coil-helix-coiled-coil-helix domain containing 4 (2)	-0.0625	0.0625	-0.172	0.362	0.09	0.627	-0.39	-0.01	-0.06	0.06	0.21
1315	COPB || coatomer protein complex, subunit beta (1)	-0.3	-0.5	0.3	0.45	0.253	9.54e-09	-0.027	-0.448	0.183	0.113	0.442
131544	DKFZp667G2110 || hypothetical protein DKFZp667G2110 (1)	0.25	-0.08	-0.08	0.08	0.476	-0.0265	0.536	0.38	0.646	-0.874	0.23
131566	DCBLD2 || discoidin, CUB and LCCL domain containing 2 (1)	-0.11	0.03	-0.03	0.21	0.083	-2.98e-10	-0.557	0.93	-0.107	0.243	-0.24
131601	GPR175 || G protein-coupled receptor 175 (2)	0.29	0.3	-0.315	-0.29	-1.25	-0.203	0.78	0.258	-0.71	-2.8e-08	-0.472
131616	TMEM42 || transmembrane protein 42 (1)	0.35	0.05	-0.05	-0.37	-0.37	0.097	0.76	0.045	-0.08	-3.99e-08	-0.555
131691	na || similar to peptidylprolyl isomerase A (1)	0.49	-0.1	0.1	-0.26	-0.162	0.395	0.0984	0.435	0.868	1.06	-0.075
1317	SLC31A1 || solute carrier family 31 (copper transporters), member 1 (3)	-0.16	-0.306	0.16	0.59	-0.39	-0.03	6.68e-09	-0.238	0.246	-0.502	-1.1
1318	SLC31A2 || solute carrier family 31 (copper transporters), member 2 (1)	-0.115	0.115	0.355	-0.175	-0.34	-0.323	-0.31	-0.143	2.38e-09	-0.31	-0.813
131870	NUDT16 || nudix (nucleoside diphosphate linked moiety X)-type motif 16 (2)	0.57	0.09	-0.88	-0.09	-0.317	4.41e-08	0.023	-0.39	0.213	-2.13	-0.21
131965	MGC24132 || hypothetical protein MGC24132 (3)	-0.125	-0.245	0.405	0.125	0.217	0.434	-0.373	-0.03	0.307	0.047	0.03
132	ADK || adenosine kinase (1)	0.05	-0.05	0.48	-0.15	0.328	0.465	-0.462	0.505	-0.0617	0.0284	-0.505
132001	MGC16471 || hypothetical protein BC015088 (2)	0.1	-0.06	0.06	-0.23	-0.065	-0.073	-0.55	-0.378	0.005	-0.175	-0.128
132241	LOC132241 || hypothetical protein LOC132241 (2)	1.75	0.265	-0.265	-1.8	0.56	0.657	0.62	-0.233	1.05	-1.77	0.307
132320	FLJ30655 || hypothetical protein FLJ30655 (1)	-0.105	0.825	0.105	-0.345	0.85	1.03	-0.4	0.375	0.52	0.02	-0.255
1325	CORT || cortistatin (2)	0.333	0.102	-0.102	-0.848	-0.353	-0.303	-0.61	-0.899	0.285	-5.22e-10	-0.297
132556	na || similar to Transcription factor BTF3 homolog 3 (1)	-0.08	0.32	-0.08	0.08	0.055	0.342	0.075	0.32	0.325	-0.055	-0.1
132720	FLJ39370 || hypothetical protein FLJ39370 (1)	-0.08	1.26e-08	0.4	0	0.56	-0.003	-0.23	-0.19	0.19	1.37e-08	0.19
1329	COX5B || cytochrome c oxidase subunit Vb (2)	0.37	0.205	-0.205	-0.735	-0.18	0.352	0.395	0.0575	0.325	0.695	-0.0575
133	ADM || adrenomedullin (2)	-0.932	0.212	0.637	-0.212	-0.71	0.117	-0.425	-0.338	-4.05e-08	0.37	-0.298
133015	MGC29898 || hypothetical protein MGC29898 (2)	-0.598	-0.323	0.323	0.472	-0.055	0.377	9.54e-09	0.347	0.09	-0.22	-0.368
133609	na || similar to 60S acidic ribosomal protein P1 (1)	0.115	0.225	-0.115	-0.415	-0.528	0.108	0.361	0.26	-0.379	-0.108	-0.26
133790	na || similar to ribosomal protein S18 (1)	-4.47e-10	0.05	-0.44	0	-0.02	0.687	-0.34	1.02	-1.43e-08	0.39	0.23
134266	GRPEL2 || GrpE-like 2, mitochondrial (E. coli) (1)	-0.065	-0.195	0.105	0.065	0.273	-1.79e-08	-0.607	-0.1	0.483	0.083	-0.05
134285	PRP2 || proline-rich protein PRP2 (1)	0.11	-0.09	0.09	-0.25	-7.45e-09	-0.163	0.54	-0.748	0.47	-0.36	0.122
134359	FLJ35779 || hypothetical protein FLJ35779 (2)	-0.03	-0.3	0.41	0.03	0.00835	-0.43	0.0284	-0.445	-0.172	-0.0916	0.02
134429	STARD4 || START domain containing 4, sterol regulated (1)	3.77e-08	-0.35	0.31	0	-0.63	-0.383	-0.84	-0.07	8.34e-09	0.01	0.07
134492	NUDCD2 || NudC domain containing 2 (2)	-0.145	0.345	-0.335	0.145	0.84	0.827	-0.875	0.875	-4.05e-08	0.155	0.15
134548	ANKRD43 || ankyrin repeat domain 43 (1)	-0.135	0.135	0.425	-0.735	0.22	-0.233	-0.23	-0.698	-5.96e-09	-0.31	-0.208
134553	FLJ37562 || hypothetical protein FLJ37562 (1)	-0.02	0.02	-1.36	1.17	0.2	0.197	-0.38	0.52	-1.91e-08	-0.61	-0.52
1347	COX7A2 || cytochrome c oxidase subunit VIIa polypeptide 2 (liver) (2)	0.107	0.352	-0.107	-0.502	-1.1e-08	0.287	0.34	0.38	0.54	0.58	2.68e-09
1348	COX7AP2 || cytochrome c oxidase subunit VIIa pseudogene 2 (1)	0.27	0.5	-0.28	-0.27	0.08	0.767	-0.38	1.19	0.19	0.84	-0.045
1349	COX7B || cytochrome c oxidase subunit VIIb (2)	1.62e-08	0.165	-0.48	0	0.27	0.417	-0.9	0.68	0.39	0.575	0.41
1351	COX8A || cytochrome c oxidase subunit 8A (ubiquitous) (1)	0.445	0.135	-0.135	-0.435	-0.692	0.435	0.828	0.29	0.248	0.898	0.01
135114	HINT3 || histidine triad nucleotide binding protein 3 (1)	-0.685	0.095	-0.095	0.755	0.588	0.515	-1.48	0.4	0.0284	-0.252	-0.4
135295	SRrp35 || serine-arginine repressor protein (35 kDa) (1)	-0.28	0.18	0.38	-0.18	0.491	0.199	-0.648	0.165	1.01	2.4	-0.065
1353	COX11 || COX11 homolog, cytochrome c oxidase assembly protein (yeast) (2)	0.122	0.0025	-0.343	-0.0025	0.45	0.072	-0.095	-0.178	-0.108	-0.12	-0.013
1355	COX15 || COX15 homolog, cytochrome c oxidase assembly protein (yeast) (2)	-0.37	-0.675	0.37	0.905	-0.0916	0.162	-0.202	-0.418	-0.0416	-0.282	-0.558
135521	FKBP1C || FK506 binding protein 1C (1)	0.36	0.4	-0.36	-0.46	-0.222	-0.165	-0.132	0.722	0.308	0.318	0.302
136	ADORA2B || adenosine A2b receptor (1)	0.2	0.13	-0.13	-0.55	-0.33	-0.253	-0.22	-0.118	-1.19e-08	-0.01	-0.128
1362	CPD || carboxypeptidase D (1)	-0.085	-0.495	0.085	0.495	0.35	0.357	-0.425	-0.398	-0.46	1.25e-08	0.392
1363	CPE || carboxypeptidase E (1)	-0.68	0.01	-0.01	0.4	2.98e-10	0.357	-0.46	0.855	0.24	-2.51	-0.435
136647	C7orf11 || chromosome 7 open reading frame 11 (1)	0.165	0.345	-0.165	-0.205	0.11	0.537	7.45e-11	0.07	1.08	1.23	-6.86e-09
1371	CPOX || coproporphyrinogen oxidase (1)	-0.455	-0.265	0.265	1.14	0.636	0.213	-0.533	-0.075	-0.283	0.516	0.075
137107	na || similar to ribosomal protein L10a (1)	0.26	0.12	-0.39	-0.12	0.0384	0.165	-0.932	0.075	0.158	0.298	0.655
137392	LOC137392 || similar to CG6405 gene product (1)	-0.27	-0.3	0.45	0.27	0.06	-0.083	-0.76	-0.045	0.38	3.58e-09	0.045
1376	CPT2 || carnitine palmitoyltransferase II (1)	-0.195	0.295	-0.285	0.195	-0.4	-0.133	1.19e-08	-0.313	-0.09	-0.3	-0.843
137682	MGC40214 || hypothetical protein MGC40214 (1)	-0.275	0.155	0.425	-0.155	0.69	0.357	-0.73	-0.26	0.07	-0.01	0.26
137886	LOC137886 || hypothetical protein LOC137886 (2)	-0.175	0.175	-0.185	0.18	0.095	0.097	-0.305	0.354	2.98e-09	-0.405	-0.291
137964	DKFZp586M1819 || putative lysophosphatidic acid acyltransferase (1)	0.005	0.285	-0.795	-0.005	-0.13	0.507	0.33	-0.65	-7.15e-09	-2.75	-0.08
138199	C9orf41 || chromosome 9 open reading frame 41 (1)	-0.09	-2.79e-08	0.21	0	1.86e-10	-0.493	-0.51	-0.375	0.74	0.8	0.375
138241	C9orf85 || chromosome 9 open reading frame 85 (3)	-0.393	-0.133	0.133	0.163	0.26	0.66	-1.54	0.315	-0.43	-0.485	-0.315
138311	MGC20262 || hypothetical protein MGC20262 (1)	-0.01	0.01	0.15	-0.83	0.04	-0.583	1.35	-0.46	-4.77e-09	-0.16	0.27
1384	CRAT || carnitine acetyltransferase (2)	-0.0075	0.188	0.0075	-0.472	-0.21	-0.688	3.28e-09	-0.267	-0.345	-0.705	0.267
138428	C9orf115 || chromosome 9 open reading frame 115 (1)	-0.02	0.29	0.02	-0.37	-0.087	9.54e-09	0.758	-0.253	0.023	-0.067	-0.0875
1385	CREB1 || cAMP responsive element binding protein 1 (3)	-0.689	-0.181	0.181	0.476	0.193	0.28	-0.184	0.26	0.116	-0.197	-0.26
1386	ATF2 || activating transcription factor 2 (1)	-0.045	0.045	-0.055	0.965	0.21	0.277	-1.06	0.685	-0.805	-4.17e-09	-0.515
1387	CREBBP || CREB binding protein (Rubinstein-Taybi syndrome) (1)	0.14	-0.08	-0.22	0.08	0.843	3.28e-09	-0.087	0.155	-0.237	0.113	0.145
139285	FLJ39827 || hypothetical protein FLJ39827 (1)	0.23	0.05	-0.05	-0.06	0.263	5.96e-09	0.583	-0.08	0.203	-2.71	0.08
139341	FUNDC1 || FUN14 domain containing 1 (1)	0.095	0.225	-0.095	-0.125	0.41	0.347	-0.8	0.08	3.58e-09	0.17	-0.04
139596	RP11-311P8.3 || hypothetical protein MGC23937 similar to CG4798 (1)	-0.03	0.03	0.27	-0.07	0.08	0.357	-0.27	-0.025	0.96	0.68	0.025
1398	CRK || v-crk sarcoma virus CT10 oncogene homolog (avian) (2)	-0.37	0.05	-0.05	1.75	-0.93	0.067	-0.23	0.292	0.095	1.12	-0.013
139886	LOC139886 || hypothetical protein LOC139886 (1)	0.66	0.1	-0.1	-0.38	-6.26e-09	-0.263	-0.25	0.365	0	0.02	-0.365
14	AAMP || angio-associated, migratory cell protein (1)	0.275	0.415	-0.415	-0.275	0.233	-2.5e-08	0.323	0.212	0.443	0.073	0.672
140459	ASB6 || ankyrin repeat and SOCS box-containing 6 (2)	0.135	-0.085	0.085	-1.35	0.225	-0.128	0.055	-0.312	0.065	-0.125	0.0275
140461	ASB8 || ankyrin repeat and SOCS box-containing 8 (2)	-0.28	-0.075	0.075	0.16	0.36	0.377	-0.525	0.152	0.22	4.47e-10	-0.0675
140465	MLC1SA || myosin light chain 1 slow a (1)	0.08	-1.36e-08	-0.88	0	-2.77e-08	-0.203	0.43	0.01	0.35	0.22	-0.22
140467	ZNF358 || zinc finger protein 358 (2)	0.47	-0.76	0.45	-0.45	-0.32	-0.623	0.46	-0.275	-0.6	-0.22	0.275
140606	SELM || selenoprotein M (1)	-9.98e-09	-0.46	-8.05e-09	0	-0.8	-0.123	-2.38e-09	-0.375	0.91	1.39	0.375
140680	C20orf96 || chromosome 20 open reading frame 96 (1)	0.355	0.035	-0.275	-0.035	-0.33	0.027	-9.54e-09	-0.203	0.22	0.54	0.367
1407	CRY1 || cryptochrome 1 (photolyase-like) (1)	0.01	-0.04	0.32	-0.01	0.393	-1.79e-09	-0.177	-0.325	0.143	0.143	0.325
140730	RIMS4 || regulating synaptic membrane exocytosis 4 (1)	0.05	0.12	-0.05	-0.73	0.29	-0.523	0.79	-0.503	0.3	-0.82	0.567
140739	NCE2 || NEDD8-conjugating enzyme (4)	0.005	-0.005	0.297	-0.06	0.085	0.825	-0.417	0.477	0.107	3.58e-09	-0.17
140801	RPL10L || ribosomal protein L10-like (1)	-0.195	-0.135	0.145	0.135	-0.7	0.217	0.23	0.27	-0.15	-1.79e-09	-0.27
140809	SRXN1 || sulfiredoxin 1 homolog (S. cerevisiae) (1)	-0.325	-0.175	0.175	0.475	-0.01	0.047	-0.62	0.222	2.1	1.77	1.5
140823	C20orf52 || chromosome 20 open reading frame 52 (1)	0.59	0.24	-0.24	-0.65	-0.63	0.037	0.14	0.272	0.17	0.51	-0.008
140826	BXDC1P || brix domain containing 1 pseudogene (1)	0.055	0.745	-0.665	-0.055	0.82	0.557	-1.54	0.155	2.38e-09	-0.12	0.085
140831	ZSWIM3 || zinc finger, SWIM domain containing 3 (1)	0.03	1.02e-08	-0.25	0	-0.247	-1.31e-08	0.423	0.245	-0.297	0.373	-0.245
140838	HDHD4 || haloacid dehalogenase-like hydrolase domain containing 4 (1)	-0.09	2.21e-08	1.46	0	-0.08	0.427	-0.455	0.0725	-0.16	0.1	-0.0725
140890	SFRS12 || splicing factor, arginine/serine-rich 12 (2)	-0.1	-0.34	1.06	0.1	0.23	0.947	-0.41	0.79	-1.19e-08	1.34	-0.495
1415	CRYBB2 || crystallin, beta B2 (1)	0.405	0.385	-0.385	-0.455	0.16	0.347	-0.39	-0.0175	0.06	-1.37	-0.728
142	PARP1 || poly (ADP-ribose) polymerase family, member 1 (2)	-0.135	-0.085	0.085	0.195	-0.43	0.217	-0.05	0.642	0.11	-5.9e-08	1.12
1421	CRYGD || crystallin, gamma D (1)	0.365	0.305	-0.305	-0.375	-0.421	-0.624	0.619	-0.065	0.159	-0.291	0.065
142678	MIB2 || mindbomb homolog 2 (Drosophila) (1)	0.13	-0.08	0.08	-0.16	-0.02	-0.323	0.52	-0.443	0.09	-0.46	0.447
142679	DUSP19 || dual specificity phosphatase 19 (2)	-0.14	-0.4	0.14	0.22	0.263	-4.17e-09	-0.357	0.325	-0.21	0.433	-0.325
143	PARP4 || poly (ADP-ribose) polymerase family, member 4 (2)	-0.735	0.225	-0.225	0.255	0.25	0.182	-0.655	0.32	0.03	-2.31	0.205
1431	CS || citrate synthase (3)	-0.307	-0.057	0.057	0.107	-0.28	0.062	-0.467	0.009	1.91e-08	-0.033	-0.077
143158	na || similar to centaurin, gamma-like family, member 1; ARF GTPase-activating protein; Em:AC012044.1 (1)	-0.025	0.055	0.025	-0.615	0.25	-0.033	1.03	-0.44	-2.62e-08	-2.74	0.44
1432	MAPK14 || mitogen-activated protein kinase 14 (3)	-0.873	-0.33	0.33	0.49	-0.033	0.116	2.91e-08	-0.448	0.082	-0.238	-0.0385
143243	na || similar to Eukaryotic translation initiation factor 5A (eIF-5A) (eIF-4D) (Rev-binding factor) (1)	0.185	0.725	-0.195	-0.185	-1.05	-0.415	0.478	-3.46e-08	0.268	-0.322	-2.59e-08
143384	C10orf46 || chromosome 10 open reading frame 46 (2)	-0.122	-0.0375	0.0375	1.04	-1.1e-08	-0.048	-0.37	-0.118	0.035	-0.515	-0.228
1434	CSE1L || CSE1 chromosome segregation 1-like (yeast) (15)	-0.655	-0.468	0.468	0.748	-0.213	0.777	-0.03	0.462	2.38e-09	0.77	-0.462
143458	LOC143458 || hypothetical protein LOC143458 (1)	-0.095	-0.485	0.175	0.095	0.09	-0.003	-0.29	0.23	1.52	1.27	0.63
143888	KDELC2 || KDEL (Lys-Asp-Glu-Leu) containing 2 (2)	-0.45	0.45	-0.57	0.83	0.0184	0.31	-0.402	0.603	0.108	-0.182	-0.502
144097	LOC144097 || hypothetical protein BC007540 (1)	0.26	0.4	-0.26	-0.69	-0.64	-1.06	0.87	-0.055	5.01e-08	-0.59	0.055
144108	FLJ39441 || hypothetical protein FLJ39441 (1)	0.08	-4.1e-09	-0.07	0	0.208	0.525	-0.282	0.15	0.378	-0.00165	-0.15
1442	CSH1 || chorionic somatomammotropin hormone 1 (placental lactogen) (2)	0.1	-0.1	0.21	-0.21	-0.26	-0.303	1.67e-08	-0.96	-0.4	0.11	-0.31
144203	OVOS2 || ovostatin 2 (2)	0.1	-0.05	0.05	-0.18	0.578	0.885	0.463	0.305	0.313	-0.0766	0.235
144233	LOC144233 || hypothetical protein LOC144233 (1)	0.115	-0.105	0.085	-0.085	0.42	0.587	-0.04	-0.023	0.36	-1.25e-08	0.017
144363	LOC144363 || hypothetical protein LOC144363 (2)	-0.0425	0.0425	-0.672	0.938	0.76	0.687	-0.775	0.912	-0.76	0.23	-0.527
144438	LOC144438 || hypothetical protein LOC144438 (1)	0.01	-0.49	0.2	-0.01	0.36	-0.043	0.26	0.027	0.31	0.41	0.727
144455	E2F7 || E2F transcription factor 7 (1)	-0.245	-0.305	0.245	0.445	0.333	-5.96e-09	0.443	0.48	0.373	0.193	-0.08
1445	CSK || c-src tyrosine kinase (1)	0.215	0.585	-0.215	-1.49	-1.05	-1.05	0.435	0.05	-0.285	-0.425	-0.14
144581	RPL14L || ribosomal protein L14-like (1)	0.185	0.575	-0.595	-0.185	0.89	0.807	-1.6	0.325	-0.32	3.64e-08	0.925
144638	FAM10A3 || family with sequence similarity 10, member A3 (1)	-0.03	-0.21	0.03	0.9	0.14	0.417	-1.79e-09	0.445	0.43	0.55	0.245
144811	FLJ38725 || hypothetical protein FLJ38725 (1)	-2.43e-08	-0.18	0.51	0	0.776	0.173	-0.574	0.81	0.306	-0.173	-0.36
145165	FAM10A4 || family with sequence similarity 10, member A4 (2)	0.01	-0.01	-0.82	0.3	0.765	0.507	-1.39	0.273	1.31e-08	0.175	0.228
1452	CSNK1A1 || casein kinase 1, alpha 1 (5)	-0.0855	-0.0125	0.0125	0.774	0.105	0.279	-0.26	-0.032	6.08e-09	-0.942	-0.308
145258	GSC || goosecoid (1)	0.245	0.355	-0.245	-0.885	0.07	-0.283	0.28	-0.25	0.19	-1.09	0.12
1453	CSNK1D || casein kinase 1, delta (3)	-0.105	0.245	0.105	-0.145	0.031	-0.042	0.118	-0.14	0.056	0.398	0.14
145389	SLC38A6 || solute carrier family 38, member 6 (2)	0.065	-0.175	0.835	-0.065	2.24e-08	0.007	0.155	0.285	0.195	-0.11	-0.285
1454	CSNK1E || casein kinase 1, epsilon (2)	0.203	0.193	-0.193	-0.512	-0.27	-0.613	0.67	-1.04	1.91e-08	-0.74	-0.105
145553	MGC5987 || hypothetical protein MGC5987 (1)	0.495	0.385	-0.385	-0.425	-0.12	0.337	-0.12	0.46	-0.01	0.34	-0.46
145567	TTC7B || tetratricopeptide repeat domain 7B (1)	0.145	0.095	-0.215	-0.095	-0.25	0.007	-0.63	-0.215	3.58e-09	-1.3	0.085
1456	CSNK1G3 || casein kinase 1, gamma 3 (2)	-0.647	-0.422	0.422	0.593	0.255	0.037	-0.11	0.182	0.145	-0.24	-0.301
1457	CSNK2A1 || casein kinase 2, alpha 1 polypeptide (1)	-0.105	-0.275	0.195	0.105	0.05	0.147	0.37	-0.44	-0.385	2.44e-08	-0.415
145748	FLJ33008 || hypothetical protein FLJ33008 (2)	-0.045	-0.235	0.045	1.19	-0.05	-0.273	0.78	-0.04	-0.505	2.92e-08	0.16
145758	LOC145758 || hypothetical protein LOC145758 (1)	-0.015	-0.305	0.015	0.475	0.383	1.55e-08	0.253	-0.158	0.213	0.083	0.222
145786	LOC145786 || hypothetical protein LOC145786 (1)	-0.005	-0.265	0.005	0.585	-0.0216	0.285	-0.152	0.325	0.0784	0.0883	-0.325
145815	MGC18216 || hypothetical protein MGC18216 (1)	0.15	-0.15	-0.3	0.42	0.67	0.357	-0.34	0.715	-7.15e-09	0.35	0.125
145853	LOC145853 || hypothetical LOC145853 (1)	1.86e-08	-0.08	0.03	0	-0.46	-0.513	0.19	-0.266	0.07	1.25e-08	0.804
1459	CSNK2A2 || casein kinase 2, alpha prime polypeptide (15)	-0.339	-0.45	0.339	0.801	0.12	0.551	-0.0237	-0.039	-0.356	-0.0137	0.226
1460	CSNK2B || casein kinase 2, beta polypeptide (1)	0.24	-1.84e-08	-1.76e-08	0	-0.322	-0.0246	-0.162	-1.07e-08	0.138	0.338	0.83
146198	ZFP90 || zinc finger protein 90 homolog (mouse) (2)	-0.28	-0.38	0.28	0.825	0.2	-0.003	-0.23	0.593	0.41	-4.77e-09	-0.562
146223	CKLFSF4 || chemokine-like factor super family 4 (3)	0.0517	-0.0517	-0.162	0.8	-0.652	-0.53	-0.147	-0.922	-1.07e-09	-1.71	0.245
146517	LOC146517 || hypothetical protein LOC146517 (1)	0.265	-0.175	0.025	-0.025	0.32	-0.213	-0.3	-0.563	0.13	0.35	0.427
146542	ZNF688 || zinc finger protein 688 (1)	-0.03	0.16	0.03	-0.92	-8.94e-10	-0.423	0.62	-0.393	-0.25	-0.52	-0.603
1466	CSRP2 || cysteine and glycine-rich protein 2 (2)	0.32	0.385	-0.43	-0.32	-0.317	0	-0.027	0.125	-0.022	0.208	-0.125
146691	TOM1L2 || target of myb1-like 2 (chicken) (1)	0.355	0.285	-0.285	-0.585	0.325	-0.168	0.05	0.072	-5.96e-10	-0.235	-0.058
146923	RUNDC1 || RUN domain containing 1 (1)	-0.01	0.01	-0.27	0.04	0.01	-0.233	0.23	0.1	0.26	0.21	0.22
147007	C17orf32 || chromosome 17 open reading frame 32 (1)	-0.16	-0.08	0.29	0.08	0.15	-0.123	-0.83	-0.065	0.07	-0.07	0.065
147015	MGC23280 || hypothetical protein MGC23280 (1)	-0.505	0.075	-0.075	0.095	3.28e-09	-0.183	1.02	0.02	9.54e-09	-1.38	-0.02
1471	CST3 || cystatin C (amyloid angiopathy and cerebral hemorrhage) (1)	0.425	0.365	-0.365	-0.585	-0.4	0.997	-0.085	-0.412	-0.07	0.76	-0.333
147166	na || similar to tripartite motif-containing 16; estrogen-responsive B box protein (1)	-0.085	0.295	-0.255	0.085	0.05	-0.113	0.06	0.177	0.46	-1.61e-08	-0.323
147172	DKFZp667M2411 || hypothetical protein DKFZp667M2411 (2)	-0.02	0.02	-0.28	0.56	0.48	-0.058	-9.54e-09	-0.625	0.375	-2.24	0.239
147184	MGC21518 || hypothetical protein MGC21518 (1)	0.165	0.135	-0.285	-0.135	-0.682	0.125	0.608	-0.218	0.00835	0.0583	0.072
1476	CSTB || cystatin B (stefin B) (1)	2.34e-08	0.1	-0.64	0	-0.352	0.285	0.278	0.085	0.688	0.678	0.205
147650	LOC147650 || hypothetical protein LOC147650 (1)	-0.045	0.045	0.095	-1.25	0.14	0.247	0.84	0.63	0.16	-0.71	0.03
147699	FLJ40125 || hypothetical protein FLJ40125 (1)	0.675	0.505	-0.505	-0.525	0.36	-0.163	-0.32	-0.273	0.72	0.28	0.407
1477	CSTF1 || cleavage stimulation factor, 3' pre-RNA, subunit 1, 50kDa (2)	0.06	-0.14	0.17	-0.06	-0.76	-0.533	-0.08	-0.753	-2.62e-08	0.25	-0.113
147727	LOC147727 || hypothetical protein LOC147727 (2)	0.33	0.3	-0.64	-0.3	-1.01	-0.233	0.19	-0.71	-0.13	-1.37	-0.55
1478	CSTF2 || cleavage stimulation factor, 3' pre-RNA, subunit 2, 64kDa (1)	0.27	-0.07	-0.44	0.07	0.598	-0.135	-0.0617	-0.805	0.128	-0.142	0.474
147841	SPBC24 || spindle pole body component 24 homolog (S. cerevisiae) (1)	-0.22	0.02	0.02	-0.02	-0.18	-0.173	0.38	0.227	0.37	0.2	-0.223
1479	CSTF3 || cleavage stimulation factor, 3' pre-RNA, subunit 3, 77kDa (1)	-0.155	-0.205	0.175	0.155	6.56e-09	-0.033	-0.67	0.25	0.12	-8.94e-10	-0.25
147965	LOC147965 || hypothetical protein LOC147965 (1)	1.86e-08	0.02	-0.15	0	-0.662	-0.445	0.448	0.112	0.108	0.0883	0.352
148022	TRIF || TIR domain containing adaptor inducing interferon-beta (3)	0.01	-0.01	0.67	-0.3	-2.68e-09	-0.633	0.79	-0.497	-0.403	-1.75	-0.0235
148131	KRTDAP || keratinocyte differentiation-associated protein (1)	0.03	-0.03	0.14	-0.51	-0.21	0.457	0.15	0.655	-0.09	0.09	-0.105
148203	LOC148203 || hypothetical protein LOC148203 (1)	0.455	0.145	-0.145	-0.175	-0.007	-7.15e-09	0.393	0.205	0.153	-0.207	-0.205
148206	LOC148206 || hypothetical protein LOC148206 (2)	0.06	0.35	-0.425	-0.06	-3.87e-09	0.027	-0.58	0.113	0.25	-0.22	-0.113
148223	C19orf25 || chromosome 19 open reading frame 25 (1)	0.15	0.11	-0.11	-1.16	-0.251	-0.944	0.959	-0.195	0.279	-1.11	0.195
148252	DIRAS1 || DIRAS family, GTP-binding RAS-like 1 (1)	0.22	0.05	-0.05	-0.93	-0.42	-0.743	-2.15e-08	-0.61	0.12	-0.26	0.56
148254	ZNF555 || zinc finger protein 555 (2)	-0.09	-0.19	0.09	0.24	0.293	0.4	-0.637	0.02	-0.177	-0.157	-0.02
148304	C1orf74 || chromosome 1 open reading frame 74 (1)	0.565	0.255	-0.275	-0.255	0.188	-0.215	-0.412	-0.133	0.268	-0.672	-0.503
148327	CREB3L4 || cAMP responsive element binding protein 3-like 4 (1)	0.1	-0.09	0.09	-0.68	-0.03	-0.203	0.38	0.177	0.65	-5.96e-10	0.847
148398	SAMD11 || sterile alpha motif domain containing 11 (1)	-0.15	0.15	0.29	-0.86	0.158	-0.315	0.883	-0.312	-0.477	-0.892	0.312
148413	LOC148413 || hypothetical protein LOC148413 (2)	0.25	0.52	-0.41	-0.25	0.118	-0.0646	0.193	-0.243	0.00335	-2.07	-0.173
148423	C1orf52 || chromosome 1 open reading frame 52 (2)	-0.212	-0.297	0.212	0.552	-0.08	0.087	-0.315	-0.247	0.055	-1.79e-09	0.247
1487	CTBP1 || C-terminal binding protein 1 (1)	0.22	0.68	-0.22	-0.56	-0.0216	-0.415	0.348	0.152	0.398	0.108	0.332
1488	CTBP2 || C-terminal binding protein 2 (4)	-0.9	-0.33	0.33	1.3	0.014	0.126	-2.34e-08	-0.0645	-0.04	0.672	0.0645
148867	SLC30A7 || solute carrier family 30 (zinc transporter), member 7 (2)	-0.065	-0.03	0.03	0.38	1.79e-09	-0.168	-0.515	0.0575	0.93	0.86	-0.0575
148898	LOC148898 || hypothetical protein BC007899 (1)	-0.05	5.31e-08	0.28	0	-0.1	0.067	0.24	0.145	-0.05	-0.49	0.415
149013	KIAA1245 || chomosome one amplified sequence 1 cyclophilin (1)	0.295	1.01	-0.605	-0.295	0.073	-1.08e-07	-0.757	0.555	0.033	-0.647	-0.555
149076	FLJ25476 || FLJ25476 protein (1)	-0.04	0.04	0.52	-0.27	-2.77e-08	-0.623	-2.62e-08	-0.495	-0.06	-0.5	-0.075
1491	CTH || cystathionase (cystathionine gamma-lyase) (2)	-0.04	-0.04	0.04	0.26	-0.14	0.347	3.58e-08	0.0445	-0.31	0.11	-0.52
149224	na || similar to 40S ribosomal protein S7 (S8) (1)	1.19e-09	-0.25	0.1	2.98e-10	0.353	3.58e-09	-1.34	0.177	-0.327	0.203	0.267
149420	PDIK1L || PDLIM1 interacting kinase 1 like (1)	0.08	-1.24e-08	-0.32	-1.45e-08	0.344	0.391	-0.766	0.35	0.334	-0.0258	-0.35
149448	LOC149448 || hypothetical protein LOC149448 (2)	0.005	0.025	-0.765	-0.005	0.67	0.067	-0.58	-0.08	-1.19e-08	-0.96	0.24
1495	CTNNA1 || catenin (cadherin-associated protein), alpha 1, 102kDa (1)	-9.98e-09	0.08	-0.28	0	0.29	0.397	-0.82	0.025	0.145	2.2e-08	-0.16
149603	LOC149603 || hypothetical protein LOC149603 (1)	0.2	0.49	-0.2	-0.56	0.1	-0.483	-0.58	-0.148	0.41	5.96e-10	0.132
1497	CTNS || cystinosis, nephropathic (1)	0.1	-0.06	0.06	-0.33	-1.15	-1.22	2.38e-09	-1.26	-0.92	-1.02	-1.1
149775	SANG || GNAS1 antisense (2)	0.598	0.323	-0.323	-0.378	0.182	-0.446	0.197	-0.344	-4.29e-09	-0.273	0.079
149832	LOC149832 || hypothetical protein LOC149832 (1)	-0.02	-0.19	0.02	0.21	0.24	0.237	0.33	0.857	-4.77e-09	0.52	0.397
1499	CTNNB1 || catenin (cadherin-associated protein), beta 1, 88kDa (1)	-0.135	-0.155	0.285	0.135	5.66e-09	0.017	-0.36	-0.118	0.14	0.32	0.722
150051	na || hypothetical LOC150051 (1)	0.005	0.175	-0.005	-0.815	0.23	-0.303	0.55	-0.035	-0.23	-0.61	0.035
150094	SNF1LK || SNF1-like kinase (1)	2.58e-08	2.69e-08	0.44	0	-0.0085	0.0085	-0.888	0.817	-1.07	0.322	-0.273
150223	LOC150223 || hypothetical protein LOC150223 (2)	-0.02	0.13	0.02	-0.75	-0.415	-0.163	1.45	-0.42	-0.225	1.01e-08	-0.08
150274	HSC20 || J-type co-chaperone HSC20 (2)	0.325	0.325	-0.685	-0.325	1.08	0.822	-1.08	0.85	0.275	2.68e-08	-0.345
150275	FLJ33814 || hypothetical protein FLJ33814 (1)	0.045	-0.045	0.135	-0.265	0.48	0.217	-0.23	-0.02	-0.08	0.24	0.28
150290	DUSP18 || dual specificity phosphatase 18 (1)	0.135	-0.315	0.005	-0.005	0.11	-0.643	6.56e-09	-0.948	0.24	-1.38	-0.288
1503	CTPS || CTP synthase (2)	-0.895	-0.365	0.365	0.565	-1.58e-08	0.672	-0.01	0.554	0.515	0.63	0.0445
150465	TTL || tubulin tyrosine ligase (2)	-0.335	-0.235	0.235	1.01	-2.68e-09	0.317	-0.04	-0.105	0.025	-1.01	-0.285
150472	CBWD2 || COBW domain containing 2 (4)	-0.319	-0.208	0.431	0.208	0.545	0.639	-0.535	0.639	5.59e-11	0.052	-0.483
150519	FLJ30428 || similar to hypothetical protein A230046P18; cDNA sequence BC055759 (1)	-0.01	1.5e-08	0.51	0	0.35	0.497	-0.12	-0.045	0.07	0.26	0.545
150684	COMMD1 || copper metabolism (Murr1) domain containing 1 (2)	0.177	0.0475	-0.0475	-0.122	0.16	0.312	-1.43e-08	-0.03	0.305	0.215	0.03
150771	KIAA1754L || KIAA1754-like (1)	0.02	-0.17	0.02	-0.02	-0.06	-0.273	1.91e-08	-0.835	0.29	-0.55	0.045
150776	FLJ41352 || FLJ41352 protein (1)	-0.015	0.015	0.245	-0.295	1.04e-08	-0.363	-0.08	0.357	-0.13	-0.38	-0.623
1508	CTSB || cathepsin B (1)	0.06	-0.04	0.04	-0.37	0.3	0.197	-1.43e-08	0.032	0.01	0.35	0.112
1509	CTSD || cathepsin D (lysosomal aspartyl protease) (11)	0.071	-0.071	0.274	-0.448	-0.638	-1.05e-08	0.904	-0.17	-0.0828	-0.453	0.17
151162	LOC151162 || hypothetical protein LOC151162 (2)	-0.125	-0.445	0.41	0.125	0.31	-0.418	0.325	-0.568	0.47	0.24	0.723
151176	FLJ37034 || hypothetical protein FLJ37034 (1)	-0.07	0.08	0.07	-1	-8.64e-09	-0.753	0.89	-0.875	-0.6	-0.81	-0.235
151195	FLJ40432 || hypothetical protein FLJ40432 (1)	-0.755	-0.525	0.525	0.965	-1.82e-08	0.342	-0.015	-0.258	-0.508	0.015	-0.368
1512	CTSH || cathepsin H (1)	-9.98e-09	-0.14	0.15	0	-0.79	-0.403	-1.67e-08	-0.46	-0.24	-0.18	-0.39
151230	KLHL23 || kelch-like 23 (Drosophila) (2)	0.075	-0.075	-0.195	1	-3.87e-09	-0.473	-0.715	0.072	0.445	-0.01	-0.883
151246	SGOL2 || shugoshin-like 2 (S. pombe) (1)	-0.04	-0.27	0.19	0.04	0.59	0.317	-0.74	0.62	1.91e-08	0.19	-0.4
151313	DKFZp434N062 || hypothetical protein DKFZp434N062 (2)	0.133	0.328	-0.388	-0.133	-0.4	-0.348	0.255	-0.172	0.78	0.545	0.393
1514	CTSL || cathepsin L (2)	0.075	-0.075	-0.175	0.175	0.25	0.267	0.23	-0.155	-7.15e-09	-0.05	0.155
1515	CTSL2 || cathepsin L2 (1)	-0.365	0.905	-0.635	0.365	0.44	0.527	-1.38	0.6	3.1e-08	0.18	-0.6
151525	WDSUB1 || WD repeat, SAM and U-box domain containing 1 (1)	-0.165	-0.095	0.355	0.095	0.323	-1.79e-08	-0.677	-0.093	0.043	-0.297	-0.303
151613	TTC14 || tetratricopeptide repeat domain 14 (2)	-0.04	-0.08	0.04	0.06	0.355	0.212	-2.86e-08	0.532	0.29	0.79	-0.0425
151636	DTX3L || deltex 3-like (Drosophila) (1)	0.05	-0.05	-0.05	0.09	0.53	-0.003	0.12	-0.258	2.98e-09	-0.37	0.822
151827	LRRC34 || leucine rich repeat containing 34 (1)	-0.76	-0.19	0.19	0.25	0.82	0.487	-0.3	-0.14	0.21	-0.4	0.26
152002	C3orf21 || chromosome 3 open reading frame 21 (1)	0.15	0.35	-0.15	-0.23	0.603	-1.31e-08	-0.077	-0.405	0.833	-0.197	0.405
152007	C9orf19 || chromosome 9 open reading frame 19 (1)	0.03	-0.03	0.23	-0.31	-0.3	-0.783	0.18	-0.36	2.62e-08	-1.07	0.36
152137	C3orf6 || chromosome 3 open reading frame 6 (1)	-0.11	-0.49	0.11	0.37	0.808	0.345	-0.402	0.66	0.488	-0.152	0.18
152189	CKLFSF8 || chemokine-like factor super family 8 (1)	0.28	0.03	-0.03	-0.19	-0.05	-0.263	-0.77	-0.188	-0.55	-5.96e-10	-0.078
152217	LOC152217 || hypothetical protein BC007882 (2)	0.217	0.228	-0.217	-0.927	0.005	-0.183	0.08	-0.66	0.175	-4.17e-09	-0.295
1523	CUTL1 || cut-like 1, CCAAT displacement protein (Drosophila) (3)	0.0525	-0.0525	-0.887	0.545	0.08	-0.553	0.277	-0.0225	1.43e-08	-1.33	0.0225
152302	CICE || cell death-inducing CIDE-like effector pseudogene (1)	0.235	0.305	-0.235	-0.425	-0.13	0.187	0.01	0.105	-1.19e-08	-1.01	-0.105
1525	CXADR || coxsackie virus and adenovirus receptor (1)	-0.18	-0.39	0.18	1.17	-0.397	-5.36e-09	-0.747	0.16	0.413	0.583	-0.16
152518	NFXL1 || nuclear transcription factor, X-box binding-like 1 (1)	-0.28	4.36e-08	0.46	0	0.258	0.305	-0.482	0.365	-0.122	-0.152	-0.235
152559	PAQR3 || progestin and adipoQ receptor family member III (1)	-4.62e-09	0.04	-0.24	-5.51e-09	0.363	-1.07e-08	-0.387	0.212	-0.367	0.153	-0.212
1528	CYB5 || cytochrome b-5 (1)	0.48	0.18	-0.23	-0.18	2.95e-08	-0.113	-0.33	2.27e-08	0.25	0.21	0.07
152815	THAP6 || THAP domain containing 6 (1)	-0.635	-0.425	0.425	0.625	0.543	-1.19e-09	-0.387	-0.115	0.303	-0.087	0.115
152926	PPM1K || protein phosphatase 1K (PP2C domain containing) (2)	-0.16	-0.02	0.02	1.07	-0.095	0.242	-0.125	0.035	0.72	2.92e-08	-0.035
153090	DAB2IP || DAB2 interacting protein (2)	0.545	0.215	-0.215	-1.4	0.285	-0.0529	0.265	-0.225	-0.325	-0.715	0.225
153129	FLJ90709 || hypothetical protein FLJ90709 (1)	0.18	-0.02	0.02	-0.13	0.02	0.357	-0.64	0.575	-0.01	8.94e-09	-0.285
153222	LOC153222 || adult retina protein (2)	-0.175	-1.81	0.175	0.505	-0.677	4.89e-08	-0.442	0.102	-0.307	1.14	-0.102
153241	FLJ36090 || hypothetical protein FLJ36090 (1)	0.2	-0.17	8.64e-09	0	0.355	0.272	-0.615	0.605	0.175	0.145	-0.075
153339	MGC23909 || hypothetical protein MGC23909 (2)	-0.0075	0.0075	0.372	-0.0375	0.618	0.345	-0.302	0.58	0.0134	0.323	-0.125
153396	MGC33214 || hypothetical protein MGC33214 (3)	-0.2	-0.07	0.166	0.07	0.243	1.07e-08	0.086	0.421	0.113	0.283	-0.211
1535	CYBA || cytochrome b-245, alpha polypeptide (2)	0.18	0.285	-0.18	-1.21	-0.055	-0.078	1.19	-0.381	4.77e-09	0.24	0.257
153527	ZMAT2 || zinc finger, matrin type 2 (1)	-0.045	0.045	-0.945	0.095	1.49e-09	-0.013	-0.24	0.265	0.26	0.25	-0.265
153830	FLJ31951 || hypothetical protein FLJ31951 (1)	0.05	0.03	-0.08	-0.03	0.31	0.047	-1.24	0.365	0.74	0.53	0.225
153914	LOC153914 || hypothetical protein LOC153914 (1)	-0.15	-0.38	0.15	0.34	-2.98e-10	0.017	-0.92	-0.323	0.08	0.13	0.317
1540	CYLD || cylindromatosis (turban tumor syndrome) (1)	-0.235	-0.245	0.235	0.715	1.16	-1.1	-0.667	0.644	0.0833	0.718	-0.696
154007	C6orf151 || chromosome 6 open reading frame 151 (1)	-0.125	-0.475	0.185	0.125	-0.02	0.247	0.03	0.602	0.43	0.2	-0.228
154467	C6orf129 || chromosome 6 open reading frame 129 (3)	0.844	0.663	-0.663	-0.933	-0.713	-1.31e-09	-0.363	-0.0345	0.063	-0.6	-0.382
154661	RPIB9 || Rap2-binding protein 9 (2)	-0.23	-0.465	0.23	0.94	0.258	-0.0396	0.0534	-0.415	-0.0367	-2.05	-0.24
154743	FLJ31818 || hypothetical protein FLJ31818 (1)	-0.28	-0.48	0.48	0.28	-0.143	0.143	-0.363	0.75	0.587	0.896	-0.33
154791	HSPC268 || hypothetical protein HSPC268 (1)	0.665	0.675	-0.665	-1.3	0.37	0.297	-1.03	0.56	0.47	0.46	0.03
154807	VKORC1L1 || vitamin K epoxide reductase complex, subunit 1-like 1 (2)	-0.73	0.37	-0.37	1.18	-0.115	0.627	-0.04	0.855	-0.09	-1.85e-08	-0.58
155054	ZNF425 || zinc finger protein 425 (1)	-2.23e-09	-0.1	0.35	0	-0.297	5.96e-10	0.533	0.005	-0.557	-0.587	-0.005
155061	FLJ31413 || hypothetical protein FLJ31413 (1)	-9.98e-09	-0.08	0.07	0	0.24	-0.333	-0.03	-0.353	0	0.14	-0.013
155066	ATP6V0E2L || ATPase, H+ transporting V0 subunit E isoform 2-like (rat) (2)	0.233	0.362	-0.233	-1.04	0.053	2.98e-09	0.713	-0.23	-0.077	-0.197	0.23
155370	SBDSP || Shwachman-Bodian-Diamond syndrome pseudogene (1)	-0.39	-0.01	0.83	0.01	0.47	0.837	-0.46	0.605	-0.03	-0.21	-0.605
155400	WBSCR20B || Williams-Beuren Syndrome critical region protein 20 copy B (2)	-0.15	0.17	0.15	-0.64	-0.33	0.302	1.41	0.0965	-0.305	-1.79e-09	-0.0965
157	ADRBK2 || adrenergic, beta, receptor kinase 2 (1)	0.295	0.245	-0.245	-0.505	0.15	0.787	-0.42	0.134	-0.06	-4.17e-09	-0.134
157247	MGC27345 || hypothetical protein MGC27345 (1)	0.495	0.265	-0.265	-0.335	0.32	-0.183	0.96	-0.173	0.54	-0.26	1.09
157317	CYCSL1 || cytochrome c, somatic-like 1 (2)	-0.193	-0.0175	0.512	0.0175	0.39	0.627	-0.285	0.263	0.115	0.185	-0.263
157506	RDH10 || retinol dehydrogenase 10 (all-trans) (3)	-0.195	0.05	-0.05	0.537	0.108	3.73e-10	-0.38	0.203	-0.32	0.043	-0.203
157638	NSE2 || breast cancer membrane protein 101 (1)	0.01	-0.25	0.01	-0.01	-0.194	0.0735	0.206	-0.065	-0.423	0.277	0.065
157697	LOC157697 || hypothetical protein LOC157697 (1)	0.02	0.06	-0.51	-0.02	0.863	-5.13e-08	-0.077	-0.045	0.123	-0.827	0.045
158104	na || similar to 40S ribosomal protein S10 (1)	0.385	0.535	-0.385	-1.09	-0.498	-0.0715	-0.118	0.525	0.0715	0.222	-0.525
158158	RASEF || RAS and EF hand domain containing (1)	1.86e-08	-0.61	0.11	0	-0.22	-0.103	-0.06	-0.113	0.17	-1.01e-08	0.067
158160	LOC158160 || hypothetical protein LOC158160 (2)	-0.383	-0.383	0.637	0.383	0.315	0.352	-0.23	-0.308	1.19e-08	-0.625	-0.378
158293	C9orf10OS || chromosome 9 open reading frame 10 opposite strand (2)	-0.15	-0.07	0.315	0.07	0.31	-0.048	-5.96e-10	-0.225	0.025	-0.085	-0.42
158345	na || similar to ribosomal protein L4; 60S ribosomal protein L4; homologue of Xenopus ribosomal protein L1 (1)	0.35	0.26	-0.26	-0.91	0.36	0.797	-1.48	0.155	-7.15e-09	0.47	-0.155
158427	C9orf97 || chromosome 9 open reading frame 97 (1)	-0.015	0.165	-0.645	0.015	0.93	0.297	-0.99	-0.005	-0.34	-0.18	0.485
158586	ZXDB || zinc finger, X-linked, duplicated B (1)	1.62e-08	-0.49	0.07	0	-0.365	-0.328	-0.015	-1	-0.335	0.185	0.267
158960	LOC158960 || hypothetical protein BC009467 (1)	1.34e-09	0.04	-0.79	0	-0.7	0.017	8.34e-09	0.07	-0.01	-0.12	-0.17
159	ADSS || adenylosuccinate synthase (1)	-0.15	-0.11	0.11	0.47	-7.45e-09	0.137	-0.87	-0.155	1.75	1.88	0.155
159090	LOC159090 || similar to hypothetical protein MGC17347 (1)	0.015	-0.015	-0.355	0.075	0.22	-0.413	-0.64	-0.295	0.08	-0.23	0.295
159110	LOC159110 || hypothetical protein LOC159110 (1)	0.085	0.175	-0.465	-0.085	-0.897	1.55e-08	1.98	-0.06	0.683	1.47	0.03
1595	CYP51A1 || cytochrome P450, family 51, subfamily A, polypeptide 1 (1)	-0.49	-0.24	0.24	0.36	-0.347	-3.73e-10	-0.797	0.263	0.058	0.343	-0.263
1601	DAB2 || disabled homolog 2, mitogen-responsive phosphoprotein (Drosophila) (1)	-0.26	-0.22	0.22	0.46	2.09e-09	-0.543	0.27	-0.698	-0.24	-2.8	-0.563
1602	DACH1 || dachshund homolog 1 (Drosophila) (4)	-0.79	0.41	-0.41	0.47	-2.53e-08	-0.018	-0.265	-0.269	0.443	0.455	-0.089
1604	DAF || decay accelerating factor for complement (CD55, Cromer blood group system) (1)	-0.185	-0.205	0.435	0.185	0.12	0.017	-0.7	-0.188	2.86e-08	-0.3	0.032
1605	DAG1 || dystroglycan 1 (dystrophin-associated glycoprotein 1) (1)	-0.09	-0.34	0.25	0.09	-5.07e-09	-0.933	-0.195	0.037	-0.77	-0.22	-0.383
1606	DGKA || diacylglycerol kinase, alpha 80kDa (1)	-0.035	-0.165	0.045	0.035	0.198	-0.195	0.0583	-0.325	-0.492	-0.442	0.325
160760	TA-PP2C || T-cell activation protein phosphatase 2C (1)	-0.535	-0.205	0.205	1.12	0.05	0.027	-0.47	0.167	0.39	-0.38	-0.613
1612	DAPK1 || death-associated protein kinase 1 (1)	0.08	-0.13	-0.08	0.08	0.26	-0.453	0.07	-0.228	-0.3	-0.51	0.452
1613	DAPK3 || death-associated protein kinase 3 (2)	-0.005	0.415	0.005	-0.705	-1.34e-08	-0.323	0.755	-0.11	-0.66	-0.32	0.11
1615	DARS || aspartyl-tRNA synthetase (1)	-0.1	-0.11	0.1	0.91	0.47	0.707	-0.32	0.96	1.05	0.76	-0.6
161527	LOC161527 || hypothetical protein LOC161527 (1)	0.11	2.93e-08	-0.15	0	1.01	-2.27e-08	-0.087	0.37	-0.437	-0.097	-0.31
1616	DAXX || death-associated protein 6 (1)	0.02	-0.02	-0.2	0.06	-0.335	-0.108	0.035	0.19	-0.035	0.195	-0.19
161742	SPRED1 || sprouty-related, EVH1 domain containing 1 (2)	-0.113	0.113	-0.237	0.542	-0.19	-0.533	-0.74	-0.225	0.02	0.5	0.225
1622	DBI || diazepam binding inhibitor (GABA receptor modulator, acyl-Coenzyme A binding protein) (2)	0.44	0.66	-0.44	-0.48	1.64e-09	0.142	-0.845	-1.19e-09	-0.02	-0.13	-0.515
162239	ZFP1 || zinc finger protein 1 homolog (mouse) (1)	0.01	0.04	-0.07	-0.01	0.0615	-0.0615	-0.139	0.055	0.371	0.211	-0.055
162427	LOC162427 || hypothetical protein LOC162427 (1)	-0.025	0.025	0.145	-0.175	5.81e-08	0.267	0.94	-0.88	0.38	0.11	0.23
162835	na || similar to single stranded DNA binding protein 4 (1)	-0.25	0.42	0.25	-0.5	-0.91	-0.803	0.67	0.13	-0.47	-0.47	-0.13
162979	ZNF342 || zinc finger protein 342 (1)	0.025	0.155	-0.025	-0.525	-0.16	-0.493	0.125	0.14	-0.34	-0.15	-0.175
162989	DEDD2 || death effector domain containing 2 (1)	-0.055	0.125	0.055	-0.495	-3.72e-08	-0.053	-0.39	-0.015	0.3	0.16	0.015
163	AP2B1 || adaptor-related protein complex 2, beta 1 subunit (2)	0.005	-0.03	-0.005	0.075	-0.13	-0.483	2.98e-09	-0.138	0.06	-0.03	0.337
163033	ZNF579 || zinc finger protein 579 (1)	0.225	0.135	-0.135	-0.815	-1.12	-1.62	0.73	-0.4	-0.97	-1.98	0.33
163126	CRI2 || CREBBP/EP300 inhibitor 2 (1)	0.38	0.66	-0.71	-0.38	0.92	0.437	-0.96	0.02	0.57	0.1	-0.02
163259	FLJ37099 || FLJ37099 protein (1)	0.12	-0.12	0.41	-0.12	0.737	0.124	-0.563	-0.01	-0.0383	-0.253	0.65
1633	DCK || deoxycytidine kinase (1)	-0.395	-0.335	0.535	0.335	-0.19	0.387	-0.06	0.53	-0.01	0.32	-0.53
1635	DCTD || dCMP deaminase (1)	0.025	-0.055	0.055	-0.025	-0.32	-0.563	-0.61	-0.493	-1.07e-08	-0.2	-0.533
163786	SAS-6 || spindle assembly abnormal protein 6 (1)	0.215	-0.045	-0.535	0.045	0.273	2.09e-09	-0.157	0.58	0.083	0.193	0.06
163859	C1orf55 || chromosome 1 open reading frame 55 (2)	-0.3	0.3	-0.55	0.41	0.163	0.247	-0.565	0.0705	0.253	-2.56e-08	-0.529
163882	C1orf71 || chromosome 1 open reading frame 71 (2)	-0.045	-0.105	0.045	1.02	0.065	0.007	0.135	0.32	0.255	-0.485	-0.586
164	AP1G1 || adaptor-related protein complex 1, gamma 1 subunit (2)	-0.0375	-0.233	0.0375	0.287	0.24	0.197	-0.015	-0.138	0.68	1.19e-09	0.193
1643	DDB2 || damage-specific DNA binding protein 2, 48kDa (5)	-0.0805	-0.0885	0.258	0.0805	-0.324	0.517	0.25	0.234	-0.54	-0.446	-0.234
1647	GADD45A || growth arrest and DNA-damage-inducible, alpha (1)	-0.5	-2.32e-08	0.45	0	0.4	0.177	-1.95	0.217	0.12	-0.33	-0.223
1649	DDIT3 || DNA-damage-inducible transcript 3 (1)	0.455	0.405	-0.785	-0.405	1.04e-08	0.047	-0.42	0.272	0.38	0.45	-0.148
1652	DDT || D-dopachrome tautomerase (2)	0.43	0.205	-0.205	-0.58	-0.11	-0.013	1.19e-08	-0.453	1.52	1.95	0.607
1653	DDX1 || DEAD (Asp-Glu-Ala-Asp) box polypeptide 1 (1)	-0.21	-0.19	0.29	0.19	0.84	0.857	-0.61	0.73	0.84	0.54	-0.18
165324	UBXD4 || UBX domain containing 4 (1)	-0.295	-0.115	0.165	0.115	0.77	0.477	-0.47	-0.553	0.38	3.64e-08	0.347
1657	DMXL1 || Dmx-like 1 (1)	0.265	-0.095	-0.195	0.095	0.35	0.417	-4.47e-10	0.95	-0.04	0.32	-0.11
1659	DHX8 || DEAH (Asp-Glu-Ala-His) box polypeptide 8 (1)	0.34	0.15	-0.15	-0.16	-0.027	5.96e-09	0.533	0.0345	-0.087	0.273	-0.43
1660	DHX9 || DEAH (Asp-Glu-Ala-His) box polypeptide 9 (13)	-0.1	-0.26	0.1	1.07	0.088	0.462	-0.072	0.067	0.071	-0.875	-0.263
1662	DDX10 || DEAD (Asp-Glu-Ala-Asp) box polypeptide 10 (3)	0.705	-0.245	-0.085	0.085	0.24	0.207	-0.33	0.092	-0.48	-3.52e-08	-0.358
1663	DDX11 || DEAD/H (Asp-Glu-Ala-Asp/His) box polypeptide 11 (CHL1-like helicase homolog, S. cerevisiae) (3)	0.127	0.0265	-0.0265	-0.203	0.194	-0.049	0.877	0.0186	2.43e-08	-0.303	0.382
1666	DECR1 || 2,4-dienoyl CoA reductase 1, mitochondrial (2)	-0.52	-0.28	0.675	0.28	0.225	1.04	-0.215	0.235	-4.47e-10	-0.125	-0.235
166647	GPR125 || G protein-coupled receptor 125 (1)	-1.47e-08	-0.36	0.22	0	1.76e-08	0.087	0.01	-0.058	0.13	-1.71	0.592
166815	TIGD2 || tigger transposable element derived 2 (1)	2.82e-08	-0.15	0.35	0	0.005	0.202	-0.335	-0.02	0.475	0.195	0.02
166929	MGC26963 || hypothetical protein MGC26963 (1)	-0.135	-0.585	0.135	0.755	0.227	0.213	1.03	0.14	-0.234	-0.213	-0.14
167153	PAPD4 || PAP associated domain containing 4 (1)	0.2	2.46e-09	-0.1	0	2.98e-10	-0.443	-0.08	-0.405	0.17	0.12	0.405
167227	DCP2 || DCP2 decapping enzyme homolog (S. cerevisiae) (1)	-0.115	-0.315	0.115	0.205	0.41	0.217	0.03	1.01	-4.17e-09	0.4	0.025
1675	DF || D component of complement (adipsin) (1)	0.59	0.16	-0.16	-0.98	-0.097	-1.31e-08	1.08	0.01	-0.057	0.183	-0.15
1676	DFFA || DNA fragmentation factor, 45kDa, alpha polypeptide (2)	-0.03	0.03	-0.22	0.27	-2.53e-08	-0.038	-0.13	-0.178	0.565	0.06	-0.158
1678	TIMM8A || translocase of inner mitochondrial membrane 8 homolog A (yeast) (2)	0.177	0.0975	-0.128	-0.0975	0.0883	0.385	0.658	-0.406	0.418	-0.0216	0.659
168374	ZNF92 || zinc finger protein 92 (HTF12) (2)	0.075	-0.425	0.145	-0.075	0.193	0.125	-0.762	-0.163	-0.372	0.223	0.163
169200	DKFZp762C1112 || hypothetical protein DKFZp762C1112 (1)	-0.145	-0.475	0.425	0.145	-0.287	-1.31e-08	0.373	0.515	-0.117	0.543	-0.515
169714	QSCN6L1 || quiescin Q6-like 1 (1)	0.065	0.005	-0.005	-0.325	0.6	-0.073	0.49	-0.293	0.18	-0.17	0.747
170261	ZCCHC12 || zinc finger, CCHC domain containing 12 (1)	0.075	-0.075	-1.85	0.275	0.21	0.227	-0.5	0.56	0.81	-0.5	-0.37
170394	PWWP2 || PWWP domain containing 2 (1)	0.015	0.015	-0.015	-0.895	4.47e-09	-0.073	0.63	-0.195	0.15	-1.12	0.195
170463	SSBP4 || single stranded DNA binding protein 4 (4)	0.22	0.05	-0.05	-0.69	-2.38e-09	-0.328	1.1	-0.318	-0.052	-0.37	0.318
170506	DHX36 || DEAH (Asp-Glu-Ala-His) box polypeptide 36 (1)	-0.06	-0.02	0.02	0.62	0.28	0.067	1.31e-08	-0.21	0.14	-0.29	0.21
170622	COMMD6 || COMM domain containing 6 (2)	-0.203	0.0825	-0.0175	0.0175	-0.015	0.067	-1.25	-0.043	-0.58	-0.57	-0.245
170688	NUDT4P2 || nudix (nucleoside diphosphate linked moiety X)-type motif 4 pseudogene 2 (1)	-0.005	0.005	-0.135	0.005	0.326	-0.0873	-0.964	-0.34	-0.614	-0.554	0.34
170850	KCNG3 || potassium voltage-gated channel, subfamily G, member 3 (1)	-0.14	-0.35	0.14	0.24	0.236	-0.167	-0.243	-0.193	0.167	-1.74	-0.083
170954	KIAA1949 || KIAA1949 (1)	0.31	0.11	-0.11	-0.63	-0.105	-0.208	0.635	0.077	0.105	-0.445	-0.063
171017	ZNF384 || zinc finger protein 384 (5)	0.827	0.627	-0.993	-0.627	-0.707	0.45	1.91e-09	-0.14	-0.544	1.23	0.14
171023	ASXL1 || additional sex combs like 1 (Drosophila) (2)	0.583	0.217	-0.217	-0.328	0.13	-0.173	0.375	0.215	-0.225	4.17e-09	0.115
171546	C14orf147 || chromosome 14 open reading frame 147 (3)	-0.117	0.346	0.099	-0.099	0.42	0.772	-0.577	-0.062	0.043	1.25e-08	0.33
171586	ABHD3 || abhydrolase domain containing 3 (1)	-0.09	-0.09	0.37	0.09	-5.16e-08	-0.183	-0.32	-0.068	0.15	-0.17	-0.218
1716	DGUOK || deoxyguanosine kinase (2)	-0.0425	0.282	0.0425	-0.203	0.057	0.449	7.63e-09	-0.12	1.07	1.65	0.312
1717	DHCR7 || 7-dehydrocholesterol reductase (1)	0.18	0.42	-0.18	-0.73	-0.66	-0.543	0.29	-0.158	0.13	0	-0.218
1718	DHCR24 || 24-dehydrocholesterol reductase (1)	0.44	0.21	-0.31	-0.21	-0.0208	-0.334	-0.441	-0.623	0.719	0.0892	-0.083
1719	DHFR || dihydrofolate reductase (2)	-0.265	-0.225	0.225	1.16	-0.23	1.24	0.727	0.31	1.72	-4.47e-08	0.19
1725	DHPS || deoxyhypusine synthase (3)	0.0466	0.0267	-0.0267	-0.177	-0.377	-0.113	0.0463	-0.798	0.0663	1.41e-08	0.122
1729	DIAPH1 || diaphanous homolog 1 (Drosophila) (2)	0.175	-0.265	-0.115	0.115	0.14	0.217	0.13	0.575	-0.225	-0.01	-0.168
1734	DIO2 || deiodinase, iodothyronine, type II (1)	-0.06	0.06	0.11	-0.07	-0.0808	0.0762	0.929	0.115	-0.431	-0.131	-0.115
1737	DLAT || dihydrolipoamide S-acetyltransferase (E2 component of pyruvate dehydrogenase complex) (1)	-0.53	-0.27	0.27	0.81	0.285	0.359	-0.948	0.5	-0.185	-5.18	-0.263
1738	DLD || dihydrolipoamide dehydrogenase (E3 component of pyruvate dehydrogenase complex, 2-oxo-glutarate complex, branched chain keto acid dehydrogenase complex) (2)	-0.105	-0.27	0.105	0.3	0.4	0.567	-1.49e-10	0.074	0.195	0.47	0.621
1739	DLG1 || discs, large homolog 1 (Drosophila) (3)	-0.406	0.161	-0.161	1.14	0.141	0.288	-0.346	-0.0165	-0.115	0.171	0.0165
1741	DLG3 || discs, large homolog 3 (neuroendocrine-dlg, Drosophila) (1)	-0.19	0.19	-0.49	0.34	0.38	0.387	-0.11	0.015	0.11	-2.02	-0.015
1743	DLST || dihydrolipoamide S-succinyltransferase (E2 component of 2-oxo-glutarate complex) (1)	0.58	0.34	-0.34	-0.49	0.07	0.027	-0.53	-0.237	0.18	-0.27	0.237
1745	DLX1 || distal-less homeo box 1 (1)	0.3	0.35	-0.45	-0.3	0.203	5.96e-09	-0.647	-0.018	-0.127	-0.857	-0.188
1746	DLX2 || distal-less homeo box 2 (1)	0.135	0.255	-0.135	-0.465	-0.71	-0.643	0.32	-0.375	-0.47	-1.03	0.375
175	AGA || aspartylglucosaminidase (3)	-0.429	-0.365	0.365	0.558	0.23	0.647	-0.02	0.235	1.12e-08	-0.133	-0.235
1774	DNASE1L1 || deoxyribonuclease I-like 1 (2)	-0.01	0.01	0.15	-0.325	-0.14	-0.128	-9.54e-09	-0.583	-0.38	0.8	0.367
1777	DNASE2 || deoxyribonuclease II, lysosomal (1)	0.12	0.33	-0.12	-0.66	-0.0117	0.735	0.558	-0.06	0.438	-1.28	-0.9
178	AGL || amylo-1, 6-glucosidase, 4-alpha-glucanotransferase (glycogen debranching enzyme, glycogen storage disease type III) (2)	0.115	-0.14	-0.115	0.405	-0.1	-0.008	0.025	0.225	-0.28	-1.47	-0.0982
1781	DNCI2 || dynein, cytoplasmic, intermediate polypeptide 2 (2)	0.02	-0.045	-0.02	0.455	4.47e-10	0.457	-0.235	0.211	0.09	0.29	-0.0515
1783	DNCLI2 || dynein, cytoplasmic, light intermediate polypeptide 2 (2)	-0.505	0.305	-0.225	0.225	0.48	0.742	-0.695	0.338	0.175	-0.475	-0.338
1785	DNM2 || dynamin 2 (2)	1.02	-0.145	0.145	-1.13	-0.34	-1.24	0.775	-4.89e-08	-0.815	-0.69	-4.02e-08
1787	DNMT2 || DNA (cytosine-5-)-methyltransferase 2 (2)	-0.405	-0.305	0.785	0.305	0.376	-6.44e-09	-0.549	0.07	0.506	0.896	0.312
1788	DNMT3A || DNA (cytosine-5-)-methyltransferase 3 alpha (1)	0.04	-0.36	0.32	-0.04	0.58	-0.033	0.115	-0.294	0.097	-1.73	0.174
1793	DOCK1 || dedicator of cytokinesis 1 (1)	0.155	-0.055	-0.445	0.055	0.783	-3.22e-08	0.143	0.222	0.393	2.33	0.702
1797	DOM3Z || dom-3 homolog Z (C. elegans) (3)	0.01	-0.01	0.15	-0.253	-0.493	-0.5	0.38	-0.545	0	-0.08	0.145
1798	DPAGT1 || dolichyl-phosphate (UDP-N-acetylglucosamine) N-acetylglucosaminephosphotransferase 1 (GlcNAc-1-P transferase) (2)	0.015	-0.015	0.26	-0.145	-0.295	0.077	0.555	-0.76	-0.13	-0.015	-0.175
1802	DPH2L2 || DPH2-like 2 (S. cerevisiae) (2)	0.02	0.015	-0.015	-0.375	-0.485	-0.168	0.85	-0.725	-0.095	-2.98e-10	0.37
1808	DPYSL2 || dihydropyrimidinase-like 2 (1)	0.065	-0.065	-0.535	0.405	2.71e-08	-0.033	-0.5	-0.17	0.62	-0.68	0.165
1810	DR1 || down-regulator of transcription 1, TBP-binding (negative cofactor 2) (1)	-0.465	-0.385	0.385	0.385	0.19	0.107	-0.07	0.398	0.51	0.4	-0.398
1818	DRD5P2 || dopamine receptor D5 pseudogene 2 (1)	0.3	0.27	-0.27	-0.62	-0.06	0.157	0.25	0.115	0.29	-7.15e-09	-0.115
1822	ATN1 || atrophin 1 (1)	0.295	0.575	-0.295	-1.25	0.0742	-1.08	0.174	-0.085	-0.731	-1.49	0.085
1824	DSC2 || desmocollin 2 (1)	0.045	-0.215	-0.045	0.225	0.52	0.057	-0.52	-0.075	0.37	-2.61e-10	0.555
1827	DSCR1 || Down syndrome critical region gene 1 (2)	-2.06	0.035	-0.035	1.41	-0.947	-0.85	0.108	-0.344	-0.108	0.538	0.28
1829	DSG2 || desmoglein 2 (1)	-0.46	0.04	-0.04	1.53	-0.085	0.512	0.065	0.022	0	-0.515	-0.058
1831	TSC22D3 || TSC22 domain family 3 (2)	0.185	-0.745	0.15	-0.15	-0.547	0.042	-0.263	-0.731	-0.447	-0.2	0.0145
1832	DSP || desmoplakin (1)	-0.09	0.01	-0.01	0.53	0.277	0.0335	0.246	0.567	0.612	-1.4	-0.403
1836	SLC26A2 || solute carrier family 26 (sulfate transporter), member 2 (2)	-0.105	-0.205	0.105	0.275	0.37	-0.053	-0.32	-0.085	0.865	-3.52e-08	0.085
1837	DTNA || dystrobrevin, alpha (4)	-0.01	-0.17	0.22	0.01	-0.202	-0.093	-0.107	-0.914	-0.705	1.44e-08	-0.539
1838	DTNB || dystrobrevin, beta (2)	0.41	0.3	-0.44	-0.3	-0.3	-0.753	-1.19e-08	-1.06	-0.195	-0.5	-0.273
1839	HBEGF || heparin-binding EGF-like growth factor (1)	0.015	-0.105	0.195	-0.015	0.39	0.007	-0.08	-0.743	5.96e-09	-0.07	0.007
1841	DTYMK || deoxythymidylate kinase (thymidylate kinase) (2)	0.198	0.278	-0.198	-0.583	-0.51	0.097	0.41	-0.41	-0.305	8.94e-10	-0.0255
1844	DUSP2 || dual specificity phosphatase 2 (1)	5.68e-08	5.79e-08	0.14	-0.5	-1.03	-0.753	0.17	-0.545	8.34e-08	0.4	0.545
1845	DUSP3 || dual specificity phosphatase 3 (vaccinia virus phosphatase VH1-related) (2)	-0.468	-0.263	0.497	0.263	-0.14	0.327	0.295	-0.125	-1.43e-08	-0.095	-0.015
1850	DUSP8 || dual specificity phosphatase 8 (2)	-0.025	0.025	0.975	-0.265	0.14	-0.338	0.81	-1.1	-1.33	-0.555	0.27
1852	DUSP9 || dual specificity phosphatase 9 (1)	-0.19	0.21	0.19	-1.23	-0.28	-0.843	1.52	-0.908	-0.6	-0.69	-0.098
1856	DVL2 || dishevelled, dsh homolog 2 (Drosophila) (2)	1.21	0.45	-0.45	-0.55	-0.33	-0.723	0.01	-0.125	-0.78	-0.18	0.125
1857	DVL3 || dishevelled, dsh homolog 3 (Drosophila) (2)	0.245	0.245	-0.245	-0.485	-0.115	-0.373	0.165	-0.323	0.15	-1.97	0.323
1859	DYRK1A || dual-specificity tyrosine-(Y)-phosphorylation regulated kinase 1A (1)	0.255	0.025	-0.115	-0.025	0.29	0.107	0.14	-0.075	-0.515	0.13	-0.253
1869	E2F1 || E2F transcription factor 1 (1)	-0.29	0.48	0.29	-0.82	-0.66	-0.283	1.16	-0.04	-0.06	0.06	0.04
1870	E2F2 || E2F transcription factor 2 (1)	-2.67e-08	-0.38	0.19	0	5.66e-09	-0.213	0.19	-0.378	0.37	0.22	0.112
1871	E2F3 || E2F transcription factor 3 (2)	0.0975	0.278	-0.297	-0.0975	0.323	1.55e-08	-0.627	-0.148	0.253	-0.132	-0.418
1874	E2F4 || E2F transcription factor 4, p107/p130-binding (1)	-0.105	0.285	0.105	-0.105	-0.56	-0.143	0.38	-0.26	-1.67e-08	-0.85	0.26
1875	E2F5 || E2F transcription factor 5, p130-binding (1)	-0.29	-0.2	0.2	0.39	-0.981	-0.904	-0.841	0.135	1.13	0.949	1.34
1876	E2F6 || E2F transcription factor 6 (2)	-0.27	0.025	-0.025	0.35	-0.927	0.087	-0.493	0.298	-1.16	5.07e-08	-0.551
1894	ECT2 || epithelial cell transforming sequence 2 oncogene (1)	-0.185	-0.245	0.185	1.6	0.5	0.787	-0.42	0.635	-0.1	0.68	-0.255
1902	EDG2 || endothelial differentiation, lysophosphatidic acid G-protein-coupled receptor, 2 (2)	-0.863	-0.323	0.323	1.18	0.075	0.082	-0.255	-0.17	-0.075	-0.205	0.17
1903	EDG3 || endothelial differentiation, sphingolipid G-protein-coupled receptor, 3 (1)	-0.09	0.08	-0.05	0.05	0.35	-0.033	-0.41	-0.54	0.39	-1.35	0.39
1909	EDNRA || endothelin receptor type A (1)	-0.005	0.005	-0.225	1.18	-0.298	0.0285	-0.0285	0.09	0.462	-1.35	-0.09
191	AHCY || S-adenosylhomocysteine hydrolase (2)	0.0975	0.448	-0.0975	-0.398	-0.52	-0.403	-0.115	0.27	5.96e-09	-0.315	-0.581
1911	PHC1 || polyhomeotic-like 1 (Drosophila) (2)	-0.0725	0.0725	-0.122	0.642	-0.31	-0.083	1.19e-09	-0.225	-0.397	-0.47	0.225
1912	PHC2 || polyhomeotic-like 2 (Drosophila) (11)	0.208	0.0115	-0.0115	-0.246	-0.138	-0.748	-2.34e-08	-0.51	-1.01	0.377	0.349
1915	EEF1A1 || eukaryotic translation elongation factor 1 alpha 1 (2)	0.0275	0.188	-0.0275	-0.0975	0.35	0.752	-2	0.54	-0.595	0.25	0.535
192111	MGC5352 || Bcl-XL-binding protein v68 (2)	-0.105	-5.89e-09	0.86	0	-0.557	0	0.713	0.0375	-0.157	-0.412	-0.0375
192137	C2orf12 || chromosome 2 open reading frame 12 (2)	-0.887	-0.627	0.627	2.22	-0.22	0.762	0.33	0.015	-0.28	6.56e-09	-0.015
1933	EEF1B2 || eukaryotic translation elongation factor 1 beta 2 (5)	-0.17	-0.05	0.27	0.05	0.89	1.52	-0.048	0.209	0.72	0.488	-0.209
1935	EEF1B4 || eukaryotic translation elongation factor 1 beta 4 (1)	-0.07	0.32	-0.07	0.07	1.04	0.957	-0.56	0.585	0.75	0.75	-0.185
1936	EEF1D || eukaryotic translation elongation factor 1 delta (guanine nucleotide exchange protein) (3)	0.305	0.582	-0.305	-1.04	-0.28	-1.24	0.81	-0.175	2.15e-08	1.24	0.175
1938	EEF2 || eukaryotic translation elongation factor 2 (14)	-0.804	-0.474	0.685	0.474	-0.77	0.354	0.484	-0.073	-0.178	-1.61e-08	0.073
1939	LGTN || ligatin (1)	0.09	0.23	-0.09	-0.09	1.4e-08	-0.243	0.31	-0.123	1.28	0.97	1.13
1942	EFNA1 || ephrin-A1 (1)	0.17	0.17	-0.17	-0.5	-0.097	-2.74e-08	0.283	0.027	-0.167	-0.647	-0.273
1944	EFNA3 || ephrin-A3 (1)	0.065	0.435	-0.065	-0.415	-0.0258	-0.569	1	-0.35	0.174	-0.686	3.61e-08
1948	EFNB2 || ephrin-B2 (1)	0.035	-0.075	-0.035	0.665	-8.94e-10	-0.513	0.09	-0.463	0.52	-1.4	0.677
1952	CELSR2 || cadherin, EGF LAG seven-pass G-type receptor 2 (flamingo homolog, Drosophila) (1)	0.4	0.12	-0.12	-0.7	0.453	-1.19e-09	0.413	-0.278	-0.407	-1.32	0.442
195827	C9orf21 || chromosome 9 open reading frame 21 (1)	-0.255	0.025	-0.025	0.115	0.249	0.676	-0.511	0.05	0.629	-2.5	-0.05
195828	ZNF367 || zinc finger protein 367 (1)	-0.12	-0.14	0.12	0.84	0.16	-0.053	-0.84	0.21	-0.08	-2.09e-08	-0.21
196051	PPAPDC1 || phosphatidic acid phosphatase type 2 domain containing 1 (2)	0.145	-0.135	0.135	-0.495	0.02	0.017	0.535	-0.018	0.515	-0.28	0.622
196074	METT5D1 || methyltransferase 5 domain containing 1 (2)	-0.06	-0.22	0.075	0.06	0.5	0.412	-0.595	0.568	0.075	-1.07	-0.212
1962	EHHADH || enoyl-Coenzyme A, hydratase/3-hydroxyacyl Coenzyme A dehydrogenase (1)	-0.08	0.07	-0.07	0.48	0.651	0.0385	-0.528	-0.245	0.192	-2.19	0.245
196294	FLJ25059 || hypothetical protein FLJ25059 (2)	-0.228	0.113	-0.113	0.182	-0.185	0.307	0.37	0.172	7.15e-09	0.4	-0.558
196383	MGC7036 || hypothetical protein MGC7036 (1)	0.25	0.6	-1.48	-0.25	0.908	-0.245	-0.162	-0.493	0.428	-0.852	0.297
1964	EIF1AX || eukaryotic translation initiation factor 1A, X-linked (3)	-0.02	0.02	-1.13	0.987	-1.77e-08	0.194	-0.853	0.666	-0.15	0.034	-0.457
196483	SB153 || hypothetical protein SB153 (3)	-0.132	0.132	0.339	-0.325	-0.472	0.185	0.383	-0.115	-0.38	0.243	0.115
196513	DCP1B || DCP1 decapping enzyme homolog B (S. cerevisiae) (1)	-0.375	-0.435	0.525	0.375	-0.097	2.5e-08	0.393	-0.135	-0.057	-0.097	0.135
196515	FLJ30092 || AF-1 specific protein phosphatase (1)	0.275	-0.375	-0.115	0.115	1.09	0.147	0.4	-0.133	-2.38e-08	-0.6	0.787
1967	EIF2B1 || eukaryotic translation initiation factor 2B, subunit 1 alpha, 26kDa (2)	-0.475	-0.245	0.245	0.425	-1.1e-08	0.22	-0.667	-0.872	0.18	-0.07	-0.267
1968	EIF2S3 || eukaryotic translation initiation factor 2, subunit 3 gamma, 52kDa (1)	2.82e-08	-0.01	0.51	0	-0.09	0.387	-0.91	0.64	0.19	0.59	-0.35
1973	EIF4A1 || eukaryotic translation initiation factor 4A, isoform 1 (3)	0.618	0.548	-0.548	-0.958	-5.07e-09	0.107	-0.217	0.112	0.323	0.567	0.0951
197370	NSMCE1 || non-SMC element 1 homolog (S. cerevisiae) (1)	-0.025	0.035	0.025	-0.705	-0.56	0.097	-0.04	-0.215	0.13	-8.94e-09	-0.845
1974	EIF4A2 || eukaryotic translation initiation factor 4A, isoform 2 (1)	-0.285	-0.145	0.605	0.145	0.22	0.097	-1.32	0.22	0.26	0.21	-0.22
197407	ZNF553 || zinc finger protein 553 (2)	-0.075	0.075	-0.215	1.31	-0.172	-1.03	0.138	-0.163	-0.677	0.313	0.163
1975	EIF4B || eukaryotic translation initiation factor 4B (3)	0.27	0.04	-0.74	-0.04	0.327	0.49	-0.77	0.547	0.673	0.07	-0.128
1977	EIF4E || eukaryotic translation initiation factor 4E (3)	-0.25	-0.03	0.03	0.95	-0.363	0.577	-0.406	0.344	4.77e-10	0.587	-0.344
1979	EIF4EBP2 || eukaryotic translation initiation factor 4E binding protein 2 (2)	-0.05	0.4	0.05	-0.05	0.008	2.03e-08	-0.072	0.152	0.238	-0.152	-0.368
1981	EIF4G1 || eukaryotic translation initiation factor 4 gamma, 1 (1)	0.26	0.14	-0.14	-0.73	8.94e-10	-0.103	1	-0.733	0.195	-0.2	0.328
1983	EIF5 || eukaryotic translation initiation factor 5 (3)	-0.36	-0.3	0.3	1.03	0.002	0.681	1.05e-08	0.02	0.546	1.05	0.07
1992	SERPINB1 || serine (or cysteine) proteinase inhibitor, clade B (ovalbumin), member 1 (1)	-0.395	-0.065	1.02	0.065	0.06	0.817	1.64e-09	0.267	0.26	-0.91	-0.773
1994	ELAVL1 || ELAV (embryonic lethal, abnormal vision, Drosophila)-like 1 (Hu antigen R) (2)	-1.14	-0.1	0.1	0.36	0.415	0.447	0	-0.147	0.25	-0.475	0.147
199692	ZNF627 || zinc finger protein 627 (1)	-9.98e-09	-0.16	0.43	0	-1.34e-08	0.507	-0.04	0.225	-0.62	0.02	0.025
1997	ELF1 || E74-like factor 1 (ets domain transcription factor) (1)	0.19	-0.19	-0.41	0.48	-0.017	-1.19e-09	-1.18	0.26	0.173	-0.147	0.07
199704	ZNF585A || zinc finger protein 585A (3)	-0.1	-0.217	0.1	0.733	-0.127	0.15	9.54e-09	-0.104	-0.133	-0.315	-0.468
199746	U2AF1L3 || U2(RNU2) small nuclear RNA auxiliary factor 1-like 3 (1)	0.485	0.365	-0.365	-0.705	-0.1	-0.263	0.66	-0.03	0.48	-4.17e-09	0.03
1998	ELF2 || E74-like factor 2 (ets domain transcription factor) (5)	0.356	-0.556	-0.356	1.14	0.216	0.573	8.58e-09	0.324	0.693	-0.327	-0.183
2000	ELF4 || E74-like factor 4 (ets domain transcription factor) (1)	0.19	0.02	-0.24	-0.02	-0.36	-0.463	0.34	-0.443	-0.11	-0.49	-0.523
200014	KIAA1836 || KIAA1836 protein (2)	0.198	-0.0375	0.0375	-0.142	-0.075	-0.573	-0.455	-0.468	0.11	1.73e-08	0.868
200030	LOC200030 || hypothetical protein LOC200030 (1)	0.205	-0.095	0.095	-0.105	0.35	-0.293	0.05	0.007	-0.13	1.19e-09	-0.023
200035	NUDT17 || nudix (nucleoside diphosphate linked moiety X)-type motif 17 (1)	-0.015	0.085	0.015	-0.045	0.35	0.267	0.05	-0.28	0.91	-1.15	0.28
200081	DKFZp451J0118 || taxilin (1)	0.265	0.095	-0.095	-0.535	-0.06	-0.133	0.74	-1.03	-0.05	0.27	0.295
200186	TORC2 || transducer of regulated cAMP response element-binding protein (CREB) 2 (2)	-0.03	0.06	0.03	-0.3	-0.405	-0.803	0.245	-0.626	-0.475	-0.095	0.626
2002	ELK1 || ELK1, member of ETS oncogene family (2)	-0.05	0.05	0.11	-0.77	-0.0216	-0.12	0.708	-0.26	0.333	-0.132	0.26
200205	C1orf69 || chromosome 1 open reading frame 69 (1)	-0.12	0.2	2.06e-08	0	-0.497	-1.31e-08	1.42	-0.11	-0.067	-1.02	0.11
200576	PIP5K3 || phosphatidylinositol-3-phosphate/phosphatidylinositol 5-kinase, type III (1)	-5.21e-09	-0.44	0.12	0	0.33	0.337	0.55	0.085	-0.06	0.38	0.245
200734	SPRED2 || sprouty-related, EVH1 domain containing 2 (1)	-0.12	-0.2	0.19	0.12	-0.51	-0.633	3.58e-08	-0.36	-0.03	-0.56	2.65e-08
200810	LOC200810 || similar to beta-1,4-mannosyltransferase; beta-1,4 mannosyltransferase (1)	0.255	0.065	-0.065	-0.365	-0.293	0.0335	0.727	0.02	-0.0335	0.146	-0.02
200845	KCTD6 || potassium channel tetramerisation domain containing 6 (2)	-0.03	-0.02	0.02	0.265	1.76e-08	0.432	-0.575	0.117	0.015	-0.545	-0.117
200894	ARL2L1 || ADP-ribosylation factor-like 2-like 1 (3)	-0.48	0.11	-0.11	1.03	0.108	0.408	-0.652	0.46	5.67e-08	-0.762	-0.46
2009	EML1 || echinoderm microtubule associated protein like 1 (1)	-3.86e-08	-0.28	0.55	0	-0.05	0.357	-0.58	0.047	0.05	-0.21	-0.193
200916	RPL22L1 || ribosomal protein L22 like 1 (2)	-0.26	-0.215	0.215	0.28	-6.26e-09	0.162	0.355	0.494	1.52	1.94	1.53
200933	FBXO45 || F-box protein 45 (2)	0.0325	-0.0325	-0.0725	0.302	0.155	0.292	-0.16	0.268	0.17	-1.19e-09	0.0425
200942	MGC35097 || hypothetical protein MGC35097 (1)	0.275	0.445	-0.275	-0.905	-0.1	-0.143	0.91	-1.14	0.09	-0.58	0.397
201161	PRR6 || proline rich 6 (1)	0.05	-0.05	0.13	-0.33	-0.4	0.107	0.9	-0.895	-0.33	3.58e-09	0.305
201163	FLCN || folliculin (3)	0.015	0.315	-0.015	-0.065	0.391	7.87e-09	0.896	-0.0385	-0.5	-0.047	0.0385
201164	LOC201164 || similar to CG12314 gene product (1)	0.04	-0.04	0.64	-0.15	5.66e-09	-0.103	0.05	-0.51	0.16	-0.12	-0.01
201229	LOC201229 || hypothetical protein LOC201229 (2)	0.613	0.297	-0.297	-0.618	0.228	-3.22e-08	-0.007	-0.487	0.833	-0.147	0.487
201292	TRIM65 || tripartite motif-containing 65 (1)	-0.045	0.115	0.045	-0.615	0.0865	-0.0865	0.737	0.182	0.397	-0.394	-0.058
201299	RAD52B || RAD52 homolog B (S. cerevisiae) (1)	0.1	0.36	-0.1	-0.72	-0.03	0.157	-0.07	-0.708	1.3	0.17	0.902
2013	EMP2 || epithelial membrane protein 2 (1)	7.9e-09	-0.63	0.41	0	-0.72	-0.903	-4.77e-09	-0.685	-0.07	-0.02	-0.215
2014	EMP3 || epithelial membrane protein 3 (2)	0.52	0.01	-0.01	-0.1	-0.895	0.032	0.3	0.547	-4.53e-08	0.37	0.127
201514	ZNF584 || zinc finger protein 584 (1)	-0.1	0.02	-0.02	0.05	-0.06	-0.153	0.32	-0.615	-0.17	-0.36	-0.145
201562	PTPLB || protein tyrosine phosphatase-like (proline instead of catalytic arginine), member b (1)	0.05	-0.38	-8.05e-09	0	-0.274	-0.0865	-1.16	0.125	2.02	2.23	1.3
201595	SIMP || source of immunodominant MHC-associated peptides (1)	-0.255	-0.095	0.095	0.575	-1.34e-08	0.097	-0.21	-0.07	0.3	0.13	-3.35e-10
201626	2'-PDE || 2'-phosphodiesterase (1)	-0.565	-0.305	0.305	0.575	0.03	-0.283	-0.69	-0.818	0.94	0.55	0.302
201627	FLJ34969 || hypothetical protein FLJ34969 (1)	0.04	-0.12	-0.04	0.09	0.144	-0.569	-0.676	-0.35	-0.106	0.184	0.35
2017	CTTN || cortactin (1)	0.12	-0.22	1.58e-08	0	0.13	0.772	0.4	-4.89e-08	-5.01e-08	0.55	0.64
201725	LOC201725 || hypothetical protein LOC201725 (2)	-0.295	-0.52	0.295	0.54	-0.252	2.74e-08	0.038	-0.0105	-0.147	0.108	-0.161
201965	MGC10198 || hypothetical protein MGC10198 (2)	0.193	-0.0025	-0.598	0.0025	0.32	0.042	-0.38	0.71	1.91e-08	-0.32	-0.21
2020	EN2 || engrailed homolog 2 (1)	0.25	-0.06	-0.18	0.06	1.49e-09	-0.333	-0.32	-0.8	0.22	-0.67	0.06
202018	FLJ90013 || hypothetical protein FLJ90013 (1)	0.095	-0.095	-0.315	0.105	0.44	-0.023	-0.675	-0.0655	1.91e-08	0.19	-0.18
2021	ENDOG || endonuclease G (1)	0.02	0.04	-0.02	-0.82	-0.462	-0.155	1.11	0.045	0.248	0.248	-0.045
2022	ENG || endoglin (Osler-Rendu-Weber syndrome 1) (3)	-0.03	0.03	0.16	-0.25	-0.774	4.77e-09	0.593	-0.221	-0.589	-1.17	0.105
202227	na || similar to peptidyl-Pro cis trans isomerase (1)	0.12	0.04	-0.04	-0.38	-0.0517	0.215	0.508	0.225	1.01	0.988	0.155
202459	LOC202459 || similar to RIKEN cDNA 2310008M10 (1)	0.035	0.305	-0.215	-0.035	0.113	2.98e-09	-2.14	0.175	-0.842	-0.557	-0.05
2026	ENO2 || enolase 2 (gamma, neuronal) (1)	0.21	0.16	-0.16	-0.84	-1.49e-09	-0.263	0.07	1.08e-07	0.16	-0.13	0.45
203	AK1 || adenylate kinase 1 (1)	0.12	0.55	-0.12	-0.84	-0.025	-0.368	0.395	-0.42	0.415	0.025	-0.19
2030	SLC29A1 || solute carrier family 29 (nucleoside transporters), member 1 (1)	-0.115	0.115	0.305	-0.425	-0.917	5.96e-09	-0.552	-0.62	-0.692	-0.347	-0.185
203068	TUBB || tubulin, beta polypeptide (2)	0.0975	0.367	-0.0975	-0.487	-0.492	-0.265	-0.192	0.74	0.368	0.428	5.04e-08
203069	LOC203069 || hypothetical protein LOC203069 (3)	0.21	0.533	-0.21	-0.86	-0.5	-0.383	0.837	0.003	-0.25	-0.12	-0.28
203076	LOC203076 || similar to RIKEN cDNA 4930578I06 (1)	0.31	0.45	-0.31	-0.45	-0.565	-0.368	-9.54e-09	0.652	0.035	0.045	-0.238
203197	C9orf91 || chromosome 9 open reading frame 91 (1)	-0.11	0.11	-0.76	0.11	0.043	0	0.523	-2.03e-08	0.703	-0.757	-1.16e-08
203245	C9orf90 || chromosome 9 open reading frame 90 (1)	0.08	-0.08	-0.33	0.28	0.285	-0.138	-0.065	-0.248	-0.225	-0.295	-0.288
203259	C9orf25 || chromosome 9 open reading frame 25 (1)	6.71e-09	0.01	-0.32	0	9.24e-09	-0.193	0.48	-0.045	0.13	-0.12	0.045
203260	MGC31967 || hypothetical protein MGC31967 (1)	0.645	0.595	-1.35	-0.595	-1.82e-08	0.367	0.71	-0.218	1.53	0.2	1.49
203286	SAMD6 || sterile alpha motif domain containing 6 (2)	-0.128	0.0175	0.0225	-0.0175	0.445	-0.323	0.245	-0.048	0.01	-0.28	0.512
2033	EP300 || E1A binding protein p300 (1)	0.1	-0.1	-0.95	0.5	0.46	-0.013	0.45	0.397	-0.03	0.04	0.307
203411	LOC203411 || hypothetical protein LOC203411 (1)	0.11	-0.11	-0.53	0.17	0.063	3.58e-09	-0.087	-0.035	-0.317	0.243	0.035
203427	LOC203427 || similar to solute carrier family 25 , member 16 (1)	-0.305	0.025	0.115	-0.025	0.15	-0.053	-0.55	0.53	0	-0.42	-0.53
2035	EPB41 || erythrocyte membrane protein band 4.1 (elliptocytosis 1, RH-linked) (1)	0.335	0.295	-0.295	-0.505	0.15	-0.033	0.23	-0.095	-0.14	0.05	1.24
203547	LOC203547 || hypothetical protein LOC203547 (2)	-0.0375	0.0375	0.0775	-0.0525	0.46	0.347	1.07e-08	-0.0225	1.06	0.815	0.0225
2036	EPB41L1 || erythrocyte membrane protein band 4.1-like 1 (2)	-0.665	0.035	-0.035	0.465	-0.27	-0.403	0.584	-0.135	0.27	-4.71	0.135
203859	TMEM16E || transmembrane protein 16E (1)	-0.1	0.1	-0.33	0.14	0.486	0.0235	-0.0235	-0.075	0.197	-4.15	0.075
204	AK2 || adenylate kinase 2 (3)	-0.535	-0.175	0.175	0.395	-0.0386	0.342	-0.119	0.0725	0.312	0.0284	-0.0725
2040	STOM || stomatin (4)	-0.138	-0.45	0.412	0.138	6.86e-09	0.047	-0.197	0.312	-0.1	-5.96e-10	-0.444
2043	EPHA4 || EPH receptor A4 (2)	-0.468	0.468	-0.547	1.27	0.045	0.132	-0.425	0.442	-0.105	-0.2	-0.488
2048	EPHB2 || EPH receptor B2 (2)	0.135	0.07	-0.605	-0.07	-0.577	-0.66	0.703	-0.05	0.0964	-0.337	-0.417
205	AK3L1 || adenylate kinase 3-like 1 (2)	-0.065	0.3	0.065	-0.435	0.073	0.353	-0.467	0.485	-0.087	-1.27	0.329
2050	EPHB4 || EPH receptor B4 (1)	0.22	0.07	-0.07	-0.62	-0.04	-0.783	0.9	-0.083	7.15e-09	-0.39	0.037
205251	LOC205251 || hypothetical protein LOC205251 (1)	-9.58e-08	-0.21	0.01	0	-0.41	0.347	0.64	0.31	2.38e-09	0.41	-0.19
205327	FLJ38973 || hypothetical protein FLJ38973 (1)	-0.28	-0.03	0.03	0.23	-2.3e-08	-0.013	-0.49	0.24	0.53	0.56	-0.24
2054	EPIM || epimorphin (1)	-0.09	-0.32	0.09	0.09	1.64e-09	-0.063	-0.32	0.14	0.155	0.18	-0.14
205428	MGC33365 || hypothetical protein MGC33365 (1)	0.225	0.065	-0.745	-0.065	0.286	-0.127	-0.744	0.16	0.127	-0.283	-0.16
205717	KIAA2018 || KIAA2018 (1)	0.095	-0.235	-0.095	0.845	-0.29	-0.003	0.62	0.14	0.39	-1.37e-08	-0.14
2058	EPRS || glutamyl-prolyl-tRNA synthetase (3)	0.255	-0.255	-0.355	0.905	0.583	0.65	-0.51	0.565	2.62e-08	-0.38	-0.565
2060	EPS15 || epidermal growth factor receptor pathway substrate 15 (2)	-0.16	0.16	-0.31	0.965	0.49	0.812	-0.475	0.58	-1.91e-08	-0.53	0.065
2063	NR2F6 || nuclear receptor subfamily 2, group F, member 6 (1)	0.19	0.24	-0.19	-1.26	0.085	-0.368	1.32	-0.325	-0.105	-0.085	0.175
206358	SLC36A1 || solute carrier family 36 (proton/amino acid symporter), member 1 (2)	-0.1	0.185	0.07	-0.07	-0.08	-0.068	8.94e-10	-1.05	0.21	-0.325	0.28
2067	ERCC1 || excision repair cross-complementing rodent repair deficiency, complementation group 1 (includes overlapping antisense sequence) (5)	0.119	0.245	-0.119	-0.367	-0.238	0.117	0.224	0.11	-4.29e-09	-0.043	-0.11
207	AKT1 || v-akt murine thymoma viral oncogene homolog 1 (2)	-0.0825	0.318	0.0825	-0.443	6.86e-09	-0.008	1.02	0.06	0.825	-0.35	-0.06
2071	ERCC3 || excision repair cross-complementing rodent repair deficiency, complementation group 3 (xeroderma pigmentosum group B complementing) (1)	0.37	0.01	-0.01	-0.13	-0.0535	0.0535	0.587	0.087	0.216	-0.164	-0.023
2077	ERF || Ets2 repressor factor (1)	-0.245	0.245	0.385	-1.25	-0.84	-1.05	0.87	0.4	-0.7	-1.47	-0.51
2098	ESD || esterase D/formylglutathione hydrolase (2)	-0.095	0.095	0.125	-0.51	-0.0517	0.0754	-0.742	-0.075	-0.0566	0.173	0.41
2101	ESRRA || estrogen-related receptor alpha (2)	-0.045	0.045	0.225	-0.385	-0.605	-0.538	1.02	-0.555	-0.558	-0.495	0.355
2107	ETF1 || eukaryotic translation termination factor 1 (2)	-0.147	-0.258	0.147	0.782	0.0333	-0.12	-0.382	0.307	0.298	0.118	-0.307
2108	ETFA || electron-transfer-flavoprotein, alpha polypeptide (glutaric aciduria II) (2)	-0.625	-0.435	0.605	0.435	0.138	1.02	0.288	-0.125	-0.132	0.378	0.125
211	ALAS1 || aminolevulinate, delta-, synthase 1 (1)	6.71e-09	-0.02	0.31	0	-0.42	0.247	-0.22	-0.201	-0.275	0.01	-0.64
2110	ETFDH || electron-transferring-flavoprotein dehydrogenase (1)	-0.16	-0.27	0.16	0.59	0.798	0.735	-0.512	0.28	0.538	-1.02	-0.28
2114	ETS2 || v-ets erythroblastosis virus E26 oncogene homolog 2 (avian) (2)	0.005	-0.005	-0.235	0.44	-0.113	0.004	5.24e-09	-0.3	0.31	-0.403	0.01
2120	ETV6 || ets variant gene 6 (TEL oncogene) (1)	0.005	-0.075	0.015	-0.005	0.19	0.097	-1.19e-08	0.072	0.61	-0.78	0.152
2121	EVC || Ellis van Creveld syndrome (1)	0.595	0.075	-0.075	-0.255	0.322	-0.0215	0.732	-0.258	0.607	-0.819	-0.557
2122	EVI1 || ecotropic viral integration site 1 (2)	0.18	-0.18	-0.29	1.04	1.28e-08	0.022	-0.195	-0.275	1.23	0.52	0.275
2130	EWSR1 || Ewing sarcoma breakpoint region 1 (3)	0.245	0.215	-0.215	-0.295	2.95e-08	0.037	0.11	-0.365	0.313	0.29	0.365
2131	EXT1 || exostoses (multiple) 1 (1)	5.2e-08	0.12	-0.02	5.11e-08	0.073	1.43e-08	-0.537	-0.06	0.613	0.193	0.06
2135	EXTL2 || exostoses (multiple)-like 2 (1)	0.05	0.07	-0.05	-0.39	-1.1e-08	0.037	0.18	0.3	0.03	-0.36	-0.23
2137	EXTL3 || exostoses (multiple)-like 3 (1)	0.315	0.025	-0.025	-0.325	-0.05	-0.243	0.72	-0.535	1.19e-09	-1.05	0.535
2138	EYA1 || eyes absent homolog 1 (Drosophila) (1)	-6.41e-09	-0.34	0.27	0	-0.108	0.108	0.481	0.221	-0.169	-0.358	-0.741
2145	EZH1 || enhancer of zeste homolog 1 (Drosophila) (1)	0.22	0.16	-0.37	-0.16	0.703	-8.34e-09	0.273	-0.383	0.383	-0.587	0.383
2146	EZH2 || enhancer of zeste homolog 2 (Drosophila) (4)	-0.407	-0.217	0.217	0.365	1.37e-09	0.219	-0.543	-0.412	0.024	-1.57	-0.077
2161	F12 || coagulation factor XII (Hageman factor) (1)	-0.01	0.22	0.01	-0.9	-0.49	-0.393	0.56	-1.79e-08	-1.79e-09	-0.09	-0.115
217	ALDH2 || aldehyde dehydrogenase 2 family (mitochondrial) (1)	0.41	0.77	-0.41	-0.41	0.51	-0.173	-1	0.257	0.34	-0.12	-0.003
2171	FABP5 || fatty acid binding protein 5 (psoriasis-associated) (2)	0.23	0.21	-0.21	-0.45	-0.1	0.337	-1	-0.3	-4.77e-09	0.22	0.3
2175	FANCA || Fanconi anemia, complementation group A (3)	-0.103	0.137	-0.143	0.103	0.0464	0.131	0.404	0.045	-0.162	-0.384	-0.045
2176	FANCC || Fanconi anemia, complementation group C (1)	-0.035	-0.335	0.035	0.415	-0.03	-0.233	0.8	0.377	2.15e-08	-2.02	0.347
2177	FANCD2 || Fanconi anemia, complementation group D2 (2)	-0.492	-0.0525	0.0525	0.537	-0.18	-0.208	9.54e-09	0.0875	0.245	0.23	-0.0875
2178	FANCE || Fanconi anemia, complementation group E (2)	-0.545	0.065	0.045	-0.045	-0.555	0.142	0.5	-0.258	-0.44	-0.105	0.258
2182	ACSL4 || acyl-CoA synthetase long-chain family member 4 (2)	-0.147	-0.463	0.147	0.858	0.293	0.375	-0.117	0.383	-0.0316	0.388	-0.383
2184	FAH || fumarylacetoacetate hydrolase (fumarylacetoacetase) (2)	0.04	-0.02	0.02	-0.81	-0.41	0.157	0.23	0.095	4.17e-09	-0.34	-0.095
2186	FALZ || fetal Alzheimer antigen (5)	-0.49	0.27	-0.27	0.8	0.793	-2.27e-08	0.421	0.102	-0.047	-0.887	0.362
2189	FANCG || Fanconi anemia, complementation group G (2)	0.125	-0.005	-0.015	0.005	-0.35	-0.373	0.35	-0.0575	-0.585	-0.5	0.0575
219	ALDH1B1 || aldehyde dehydrogenase 1 family, member B1 (1)	-0.44	0.02	-0.02	0.81	0.133	-5.96e-09	-0.497	0.112	0.753	-0.527	0.162
219293	FLJ37183 || FLJ37183 protein (1)	0.31	0.18	-0.18	-0.99	-0.37	0.017	1.01	0.31	-0.16	-0.01	-0.31
2193	FARSLA || phenylalanine-tRNA synthetase-like, alpha subunit (1)	0.15	0.24	-0.15	-0.46	-0.11	-0.463	0.83	-3.93e-08	-5.96e-09	0.24	1.65
219402	MTIF3 || mitochondrial translational initiation factor 3 (1)	-5.77e-08	0.3	-0.14	0	0.49	0.497	-1.99	0.065	3.58e-08	0.04	0.125
219404	MGC9850 || hypothetical protein MGC9850 (1)	-0.22	-0.09	0.09	0.28	0.11	0.237	-0.5	0.035	0.32	-0.36	-0.035
2195	FAT || FAT tumor suppressor homolog 1 (Drosophila) (1)	0.05	-0.24	0.32	-0.05	0.89	-0.083	0.7	-0.116	-0.725	-2.56e-08	-0.0805
219541	MED19 || mediator of RNA polymerase II transcription, subunit 19 homolog (yeast) (1)	0.265	0.145	-0.145	-0.415	0.2	0.297	0.24	-0.04	-1.07e-08	0.08	0.04
219654	C10orf56 || chromosome 10 open reading frame 56 (2)	0.877	-0.733	-0.0025	0.0025	6.26e-09	-0.923	-0.905	-0.388	0.62	-0.255	-0.178
219738	C10orf35 || chromosome 10 open reading frame 35 (1)	-0.01	0.06	-2.95e-08	0	-0.0617	0.775	0.758	0.17	0.548	0.668	0.15
219771	C10orf9 || chromosome 10 open reading frame 9 (3)	-0.156	0.156	-0.206	0.499	-0.235	-0.163	0.317	-0.121	0.413	-0.35	0.121
219844	HYLS1 || hydrolethalus syndrome 1 (1)	-0.055	-0.385	0.105	0.055	0.56	0.227	-1.19e-08	-0.298	0.43	-0.07	0.382
219854	LOC219854 || hypothetical protein LOC219854 (2)	0.545	0.285	-0.285	-0.38	-0.175	0.022	0.45	-0.441	5.96e-09	-0.335	-0.0305
219899	LRRC35 || leucine rich repeat containing 35 (1)	-0.18	-0.14	0.14	0.75	0.72	0.387	-5.96e-10	0.085	0.78	-1.03	-0.085
219902	MGC17839 || hypothetical protein MGC17839 (2)	-0.0125	-0.477	0.0125	0.492	-0.405	-0.068	0.37	-0.985	-9.54e-09	-0.87	0.17
219927	MRPL21 || mitochondrial ribosomal protein L21 (2)	0.292	0.207	-0.207	-0.237	0.7	0.707	-0.33	-0.141	0.33	-0.385	-0.0455
219931	TPCN2 || two pore segment channel 2 (1)	0.055	-0.085	0.405	-0.055	0.12	-0.463	0.84	0.202	-0.35	-0.57	1.49
220002	CYBASC3 || cytochrome b, ascorbate dependent 3 (1)	-0.29	1.02e-08	0.14	0	-0.24	-0.103	0.86	-0.405	5.36e-09	-0.04	0.325
220042	FLJ25416 || hypothetical protein FLJ25416 (2)	0.255	-0.24	-0.515	0.24	0.29	-0.113	-0.44	0.548	0.15	1.97e-08	-0.548
220064	ORAOV1 || oral cancer overexpressed 1 (1)	0.115	0.005	-0.115	-0.005	0.05	0.037	-0.225	0.412	-0.315	2.98e-09	-0.108
220074	LRRC51 || leucine rich repeat containing 51 (2)	0.233	0.247	-0.233	-0.623	-0.365	-0.578	-0.04	-0.136	0	-0.935	-0.685
220134	C18orf24 || chromosome 18 open reading frame 24 (1)	-0.135	-0.295	0.375	0.135	-0.35	-0.103	-0.22	-0.12	0.41	0.15	-0.52
220213	OTUD1 || OTU domain containing 1 (1)	-0.25	-0.36	0.26	0.25	0.227	-0.117	-1.31	-0.318	-0.663	0.117	0.112
220686	LOC220686 || hypothetical protein LOC220686 (2)	0.318	0.142	-0.142	-0.273	0.635	-0.133	0.36	-0.198	-4.05e-08	-0.72	0.967
220869	LOC220869 || dopamine responsive protein (1)	0.005	-0.005	0.055	-0.075	0.504	0.581	-1.49	1.53	-0.916	-0.106	-0.165
220885	LAMR1P15 || laminin receptor 1 pseudogene 15 (1)	0.055	0.255	-0.055	-0.635	-0.025	0.242	0.135	1.18	0.025	0.215	-0.23
220906	LOC220906 || hypothetical protein LOC220906 (2)	0.128	0.0425	-0.203	-0.0425	0.45	0.397	-0.07	-0.194	0.425	0.685	0.194
220972	MARCH8 || membrane-associated ring finger (C3HC4) 8 (1)	0.32	0.07	-0.1	-0.07	0.46	-0.063	0.08	-0.215	-0.11	-0.01	0.215
221002	RASGEF1A || RasGEF domain family, member 1A (1)	0.23	-0.07	5.87e-08	0	-0.09	0.237	-0.46	0.422	0.09	0.29	-0.688
221017	C10orf37 || chromosome 10 open reading frame 37 (1)	-0.62	-0.38	0.46	0.38	0.6	0.037	-0.79	0.04	0.07	-0.28	-0.04
221035	C10orf74 || chromosome 10 open reading frame 74 (2)	-0.0375	0.0375	-0.343	0.667	0.475	0.432	-0.93	0.316	0.2	-0.11	-0.392
221120	DEPC-1 || prostate cancer antigen-1 (3)	0.155	0.179	-0.155	-0.231	5.19e-09	0.347	-0.38	-0.186	0.226	-0.254	-0.406
221150	C13orf3 || chromosome 13 open reading frame 3 (2)	-0.323	-0.463	0.637	0.323	0.58	0.622	-1.49e-09	0.0775	0.5	-0.31	-0.0775
221154	EFHA1 || EF hand domain family, member A1 (2)	-0.795	-0.375	0.375	1	0.615	1.32	-0.42	1.21	0.405	0.885	-0.305
221184	CPNE2 || copine II (2)	-0.818	0.782	-0.0425	0.0425	-0.27	-0.153	7.45e-11	0.112	0.015	-0.41	0.042
221362	LOC221362 || hypothetical protein LOC221362 (2)	0.085	-0.085	-0.395	0.705	-0.14	-0.143	-0.3	-0.29	0.485	3.16e-08	-0.135
221443	C6orf130 || chromosome 6 open reading frame 130 (1)	0.1	2.21e-08	-0.1	0	4.47e-09	0.537	-0.07	0.51	0.62	0.64	0.35
221491	C6orf1 || chromosome 6 open reading frame 1 (2)	0.13	-0.81	0.38	-0.13	-0.24	-0.483	-2.15e-08	-0.435	-0.775	0.02	0.085
221496	LEMD2 || LEM domain containing 2 (1)	0.17	0.41	-0.17	-0.27	-0.01	-0.523	0.53	-0.21	0.33	-0.11	0.21
221545	C6orf136 || chromosome 6 open reading frame 136 (1)	0.235	0.045	-0.045	-0.345	-0.17	-0.173	-3.58e-08	-0.133	0.61	0.31	0.347
2217	FCGRT || Fc fragment of IgG, receptor, transporter, alpha (1)	0.255	0.315	-0.255	-0.855	-0.38	-0.413	0.7	-1.19e-09	3.58e-09	-0.16	0.59
2218	FCMD || Fukuyama type congenital muscular dystrophy (fukutin) (1)	0.26	0.1	-0.39	-0.1	0.1	0.017	2.62e-08	0.03	0.15	0.2	0.02
221908	MGC22793 || hypothetical protein MGC22793 (2)	-0.0525	0.0525	0.142	-0.642	-0.157	2.98e-09	1.11	0.07	-0.072	0.118	-0.07
221927	C7orf27 || chromosome 7 open reading frame 27 (2)	-0.06	0.19	0.06	-1	-0.45	-0.263	1.56	-0.3	-0.305	-0.415	0.3
221955	LOC221955 || KCCR13L (2)	0.22	0.43	-0.33	-0.22	-0.092	-9.54e-09	0.653	-0.19	-0.117	-0.057	0.19
222068	TMED4 || transmembrane emp24 protein transport domain containing 4 (1)	-0.145	-0.145	0.435	0.145	1.04e-08	0.067	0.55	-0.29	-0.2	0.37	0.29
222166	Ells1 || hypothetical protein Ells1 (1)	-3.86e-08	-0.1	0.07	0	-0.03	0.127	0.03	0.427	0.46	-0.11	-0.213
222194	RSBN1L || round spermatid basic protein 1-like (2)	-0.755	-0.295	0.295	1.39	0.73	0.652	-0.005	0.302	0.51	2.24e-10	-0.138
222229	DKFZp434K1815 || hypothetical protein DKFZp434K1815 (1)	-0.015	0.665	0.015	-0.985	-0.27	-0.743	1.4	-0.48	-0.01	-0.85	0.48
2224	FDPS || farnesyl diphosphate synthase (farnesyl pyrophosphate synthetase, dimethylallyltranstransferase, geranyltranstransferase) (2)	0.175	0.145	-0.355	-0.145	-0.0825	0.539	0.0825	-0.475	0.177	-0.163	-0.195
222484	LNX2 || ligand of numb-protein X 2 (1)	-0.085	-0.315	0.185	0.085	-5.63e-08	-0.343	-0.28	0.095	-0.83	-0.09	-0.095
222658	C6orf69 || chromosome 6 open reading frame 69 (1)	-0.45	-0.05	0.05	0.53	4.38e-08	0.317	-0.9	0.457	0.245	-0.07	-0.458
222699	LOC222699 || transducer of erbB-2 2 related gene (1)	0.195	-0.055	-0.055	0.055	-0.355	-0.098	7.15e-09	0.19	-0.37	-0.015	-0.685
222962	SLC29A4 || solute carrier family 29 (nucleoside transporters), member 4 (2)	0.19	0.25	-0.19	-0.96	-0.855	-1.67	0.42	-0.391	-1.21	-1.95	0.356
2230	FDX1 || ferredoxin 1 (1)	-0.135	0.085	-0.005	0.005	-0.32	0.817	0.41	-0.155	0.22	-0.21	0.155
2237	FEN1 || flap structure-specific endonuclease 1 (2)	0.285	0.185	-0.185	-0.245	0.19	0.192	-0.625	-0.072	0.205	1.97e-08	-0.595
224	ALDH3A2 || aldehyde dehydrogenase 3 family, member A2 (2)	-0.492	-0.142	0.142	0.603	-1.79e-09	-0.033	-0.14	-0.869	-0.013	-0.35	-0.371
2247	FGF2 || fibroblast growth factor 2 (basic) (1)	-0.145	-0.175	0.145	0.265	0.59	0.077	-0.25	-0.295	0.51	-8.94e-09	0.295
226	ALDOA || aldolase A, fructose-bisphosphate (3)	-0.18	0.06	0.44	-0.06	-0.717	-1.36e-08	0.091	-0.276	-0.674	-0.039	0.276
2271	FH || fumarate hydratase (1)	-0.425	-0.245	0.845	0.245	0.36	0.637	-0.82	0.055	8.34e-09	0.12	-0.055
2273	FHL1 || four and a half LIM domains 1 (1)	-0.09	-0.07	0.28	0.07	-0.05	0.357	-0.09	-0.336	-0.4	0.42	0.0395
2274	FHL2 || four and a half LIM domains 2 (1)	-0.17	-0.06	0.68	0.06	-0.037	2.5e-08	0.413	0.18	0.093	-0.057	-0.18
2275	FHL3 || four and a half LIM domains 3 (2)	-0.1	0.04	0.47	-0.04	-0.88	-0.453	-7.15e-09	0.08	-0.4	-0.31	-0.08
22796	COG2 || component of oligomeric golgi complex 2 (1)	-0.285	-0.685	0.285	0.295	-0.24	0.257	0.03	0.467	0.07	0.29	0.047
228	ALDOAP2 || aldolase A, fructose-bisphosphate pseudogene 2 (1)	0.09	0.04	-0.04	-0.61	-0.82	-0.143	0.56	0.31	-0.2	-8.94e-09	-0.31
2280	FKBP1A || FK506 binding protein 1A, 12kDa (4)	0.23	0.7	-0.23	-0.715	-0.215	-0.028	0.145	0.408	0.295	0.18	-0.0285
22800	RRAS2 || related RAS viral (r-ras) oncogene homolog 2 (2)	-0.195	-0.22	0.195	0.265	-0.165	-0.048	1.19e-08	-0.425	-0.565	-0.565	-0.162
22803	XRN2 || 5'-3' exoribonuclease 2 (3)	-0.425	-0.075	0.075	1.26	2.43e-08	1.18	-0.14	0.45	-0.07	-0.987	-0.45
22808	MRAS || muscle RAS oncogene homolog (1)	0.05	0.11	-0.31	-0.05	0.12	-0.033	-0.18	-0.508	0.38	1.79e-09	0.052
2281	FKBP1B || FK506 binding protein 1B, 12.6 kDa (1)	0.05	0.06	-0.05	-0.42	-0.49	-0.393	3.58e-09	-1.12	-0.03	-0.64	0.02
22818	COPZ1 || coatomer protein complex, subunit zeta 1 (1)	0.025	0.475	-0.025	-0.315	-0.65	-0.133	-0.17	-0.103	-0.05	2.98e-09	-1
22820	COPG || coatomer protein complex, subunit gamma (1)	-1.04e-09	0.03	-0.6	0	-0.98	-0.723	-0.69	-0.05	0.06	-1.61e-08	0.05
22826	DNAJC8 || DnaJ (Hsp40) homolog, subfamily C, member 8 (1)	0.09	-0.15	-0.09	0.14	0.34	0.217	5.96e-09	0.315	0.19	0.46	0.615
22827	SIAHBP1 || fuse-binding protein-interacting repressor (3)	0.163	0.333	-0.163	-1.02	-0.75	-0.413	0.36	-0.18	2.86e-08	0.18	0.18
22834	ZNF652 || zinc finger protein 652 (1)	-7.67e-08	-0.38	0.27	0	-0.151	0.336	-0.181	0.95	0.319	0.259	0.07
22836	RHOBTB3 || Rho-related BTB domain containing 3 (3)	-0.195	0.195	-0.455	1.06	-0.64	-0.233	-2.38e-09	-0.259	0.733	0.475	-0.658
22837	COBLL1 || COBL-like 1 (1)	0.01	-0.2	-0.01	0.21	0.76	-0.153	-0.1	0.138	0.52	0.73	0.578
22843	PPM1E || protein phosphatase 1E (PP2C domain containing) (1)	1.15e-08	-0.38	0.19	0	0.108	0.0254	-0.0416	0.105	-0.202	0.168	-0.105
22849	CPEB3 || cytoplasmic polyadenylation element binding protein 3 (1)	0.53	5.31e-08	5.39e-08	-0.24	0.72	0.397	-0.65	-1.19e-09	-0.2	0.08	0.05
22850	KIAA0863 || KIAA0863 protein (1)	-0.715	-0.605	0.605	0.785	1.76e-08	0.207	0.03	0.077	-0.27	-0.63	-0.393
2286	FKBP2 || FK506 binding protein 2, 13kDa (3)	0.283	0.473	-0.283	-0.324	-0.3	-0.263	-2.57e-08	-0.005	0.004	0.087	-0.065
22863	KIAA0831 || KIAA0831 (1)	-0.19	-0.35	0.2	0.19	0.27	0.577	-2.38e-09	0.32	0.86	0.55	0.1
22870	KIAA1115 || KIAA1115 (1)	0.795	1.19	-0.795	-1.58	0.0883	-0.405	0.288	0.387	-0.0717	-1.3	-0.213
22872	SEC31L1 || SEC31-like 1 (S. cerevisiae) (2)	-0.58	-0.32	0.32	0.705	0.105	0.247	-0.212	-0.0262	-0.167	-1	0.0262
22875	ENPP4 || ectonucleotide pyrophosphatase/phosphodiesterase 4 (putative function) (1)	-0.025	-0.145	0.025	0.675	0.236	0.194	-0.224	-0.065	0.296	-0.194	0.065
22876	INPP5F || inositol polyphosphate-5-phosphatase F (11)	-0.5	-0.53	0.885	0.5	0.398	0.29	3.41e-09	0.419	0.513	0.403	0.015
22878	KIAA1012 || KIAA1012 (2)	-0.23	-0.21	0.21	1	-0.02	0.497	-1.43e-08	0.855	-0.305	-0.05	-0.325
22879	MON1B || MON1 homolog B (yeast) (2)	-0.065	0.065	-0.335	0.205	0.31	-0.193	0.06	0.04	-0.51	-0.77	-0.04
22880	ZCWCC1 || zinc finger, CW type with coiled-coil domain 1 (1)	0.52	0.4	-0.49	-0.4	0.46	-0.123	0.89	-0.323	-3.58e-08	-0.34	0.507
22882	ZHX2 || zinc fingers and homeoboxes 2 (1)	0.14	-0.22	-0.14	0.26	-1.46e-08	-0.213	0.44	-0.098	-0.04	0.01	-0.378
22883	CLSTN1 || calsyntenin 1 (1)	0.38	-4.1e-09	-0.45	0	-0.02	-0.163	0.36	0.377	2.86e-08	0.05	-0.113
22884	WDR37 || WD repeat domain 37 (1)	0.05	0.04	-0.25	-0.04	0.05	0.057	-0.22	0.132	-0.61	0.02	-0.458
22887	FOXJ3 || forkhead box J3 (1)	-0.035	-0.075	0.035	0.125	-0.25	0.027	-0.32	0.32	-0.05	0.1	-0.406
22888	UBOX5 || U-box domain containing 5 (3)	0.075	0.095	-0.075	-0.175	3.9e-08	-0.258	0.45	-0.145	-0.427	-0.27	0.145
22889	KIAA0907 || KIAA0907 protein (2)	0.895	-0.195	0.185	-0.185	-0.288	-0.116	0.257	0.055	0.357	0.817	-0.055
2289	FKBP5 || FK506 binding protein 5 (2)	-0.075	-0.325	0.075	1.1	-1.34e-08	0.122	-0.3	0.0275	0.48	-0.415	-0.0275
22894	KIAA1008 || KIAA1008 (2)	-0.0025	0.0025	-1.22	0.0675	0.63	0.272	-0.29	0.046	-4.77e-09	-1.07	-0.046
22903	BTBD3 || BTB (POZ) domain containing 3 (1)	0.085	-0.085	-0.265	0.635	-0.21	0.287	-0.36	0.085	-1.43e-08	0.44	-0.085
22904	KIAA0963 || KIAA0963 (1)	0.395	0.255	-0.255	-0.825	-0.32	-0.913	0.94	-0.165	-0.9	-2.11	0.165
22905	EPN2 || epsin 2 (2)	-0.095	0.12	-0.805	0.095	3.28e-09	-0.403	0.743	-0.68	-0.0875	-1.04	0.417
22907	DHX30 || DEAH (Asp-Glu-Ala-His) box polypeptide 30 (1)	-1.12e-08	-0.06	0.15	0	5.96e-10	-0.383	1.46	-0.29	-0.04	0.07	0.29
22908	SACM1L || SAC1 suppressor of actin mutations 1-like (yeast) (1)	-0.03	-0.26	0.03	0.16	0.31	-0.013	-0.13	0.365	1.19e-09	0.07	-0.365
22909	KIAA1018 || KIAA1018 protein (2)	-0.455	0.015	-0.015	0.215	-0.0135	-0.0115	0.371	-0.225	0.0115	-0.638	0.822
2291	FOXG1A || forkhead box G1A (2)	0.31	-2.56e-08	-0.4	0	0.289	0.171	-0.171	0.195	-0.301	0.179	-0.576
22911	WDR47 || WD repeat domain 47 (1)	-0.065	-0.305	0.065	0.335	0.493	-1.79e-08	-0.277	-0.088	0.413	0.533	0.072
22913	RALY || RNA binding protein (autoantigenic, hnRNP-associated with lethal yellow) (1)	0.325	0.665	-0.325	-1.35	-0.562	0.185	1.03	-0.03	0.368	-0.0316	0.03
22916	NCBP2 || nuclear cap binding protein subunit 2, 20kDa (1)	0.43	0.15	-0.3	-0.15	0.58	0.167	-0.92	-0.06	0.06	-0.26	0.06
22919	MAPRE1 || microtubule-associated protein, RP/EB family, member 1 (2)	0.09	-0.185	-0.09	0.54	-0.192	1.43e-08	-0.347	0.04	0.218	0.158	0.15
22920	KIFAP3 || kinesin-associated protein 3 (1)	0.18	0.15	-0.15	-0.4	0.57	0.117	-0.73	-0.103	-0.35	-0.07	0.097
22921	MSRB2 || methionine sulfoxide reductase B2 (1)	0.65	0.56	-0.56	-0.65	2e-08	0.187	0.33	0.375	-0.01	0.19	-0.375
22929	SEPHS1 || selenophosphate synthetase 1 (2)	0.0825	-0.0825	-0.297	0.472	0.31	-0.033	4.77e-09	0.447	0.415	-0.005	-0.073
22931	RAB18 || RAB18, member RAS oncogene family (2)	-0.66	-0.285	0.285	0.35	2e-08	0.127	-1.05	0.193	0.35	0.42	-0.193
22932	POMZP3 || POM (POM121 homolog, rat) and ZP3 fusion (4)	0.345	0.075	-0.075	-0.355	-0.752	-0.555	-0.302	-0.34	0.0784	0.338	0.34
22933	SIRT2 || sirtuin (silent mating type information regulation 2 homolog) 2 (S. cerevisiae) (2)	-2.43e-08	-0.03	0.325	-2.52e-08	-1.03	-0.243	0.745	0.08	-0.415	-0.465	-0.08
22936	ELL2 || elongation factor, RNA polymerase II, 2 (2)	-0.168	-0.133	0.133	0.492	-0.37	0.242	-0.27	0.385	-0.275	-0.62	-0.601
22937	SCAP || SREBP cleavage-activating protein (1)	-2.83e-09	0.2	-8.94e-10	-0.2	-0.26	-0.523	1.09	-0.33	-0.06	-0.8	-0.03
2294	FOXF1 || forkhead box F1 (1)	0.12	0.02	-0.02	-0.39	-0.157	-8.34e-09	-0.127	0.272	0.133	0.263	-0.118
22950	SLC4A1AP || solute carrier family 4 (anion exchanger), member 1, adaptor protein (2)	-0.265	-0.125	0.125	0.875	0.88	0.917	-1.26	1.52	0.83	-1.76	-0.725
22954	TRIM32 || tripartite motif-containing 32 (1)	-0.11	-0.13	0.11	0.39	-0.07	-0.143	0.18	0.025	2.38e-08	0.16	-0.025
22955	SCMH1 || sex comb on midleg homolog 1 (Drosophila) (2)	-0.185	0.085	0.04	-0.04	-0.497	-0.155	0.641	0.346	0.00835	-0.142	-0.346
2296	FOXC1 || forkhead box C1 (2)	0.163	-0.163	0.247	-1.34	-0.167	-1.79e-08	1.21	0.55	-0.117	-0.347	-0.55
22974	TPX2 || TPX2, microtubule-associated protein homolog (Xenopus laevis) (1)	-0.095	-0.075	0.075	0.285	-0.01	0.087	0.18	-0.925	-1.31e-08	-0.2	-0.055
22977	AKR7A3 || aldo-keto reductase family 7, member A3 (aflatoxin aldehyde reductase) (1)	-0.045	0.045	0.255	-0.315	-0.507	0	0.473	0.26	-0.087	-0.057	-0.26
22978	NT5C2 || 5'-nucleotidase, cytosolic II (2)	-0.403	0.0225	-0.0225	0.177	0.59	0.307	-0.235	0.217	0.095	0.05	-0.391
22980	KIAA1049 || KIAA1049 protein (2)	-0.095	0.105	-0.105	0.095	0.013	4.89e-08	0.523	0.315	-0.067	-1.05	-0.315
22981	KIAA0980 || KIAA0980 protein (1)	0.425	0.375	-0.375	-0.805	1.1	-0.153	0.75	-0.095	0.62	-0.39	0.095
22984	PDCD11 || programmed cell death 11 (2)	-0.315	-0.395	0.345	0.315	1.15	-1.31e-08	1.56	0.402	-0.417	-0.897	-0.438
22985	ACIN1 || apoptotic chromatin condensation inducer 1 (1)	0.125	-0.105	0.105	-1.09	0.01	-0.273	0.85	0.225	-0.12	0.08	0.0895
22990	PCNX || pecanex homolog (Drosophila) (1)	0.115	-0.105	-0.025	0.025	0.583	2.03e-08	0.323	0.127	0.013	-0.097	0.387
22992	FBXL11 || F-box and leucine-rich repeat protein 11 (2)	0.0425	-0.0475	0.0675	-0.0425	0.805	-0.128	0.295	-0.063	0.235	-0.055	-0.143
22993	KIAA0194 || KIAA0194 protein (2)	0.09	0.075	-0.075	-0.215	-0.115	-0.083	1.43	-0.0175	0.03	-0.85	0.0175
23002	DAAM1 || dishevelled associated activator of morphogenesis 1 (1)	1.39e-08	-0.05	0.37	0	6.86e-09	0.307	-1.05	-0.328	0.19	-0.55	0.092
23013	SPEN || spen homolog, transcriptional regulator (Drosophila) (1)	0.55	0.09	-0.38	-0.09	1.49e-09	-0.563	0.21	-1.31	-0.46	0.95	1.49e-10
23014	FBXO21 || F-box protein 21 (2)	-0.52	0.12	-0.12	0.815	0.193	-4.47e-10	-0.602	0.505	-0.292	-0.007	-0.505
23016	EXOSC7 || exosome component 7 (1)	0.35	0.05	-0.05	-0.56	1.28e-08	0.157	0.17	-0.67	0.31	0.01	-0.09
23019	CNOT1 || CCR4-NOT transcription complex, subunit 1 (2)	-0.07	-0.21	0.07	0.21	0.135	-0.158	0.045	0.19	-0.235	-6.56e-09	0.25
23020	ASCC3L1 || activating signal cointegrator 1 complex subunit 3-like 1 (2)	-0.14	-0.03	0.03	0.915	-0.277	-1.31e-08	0.013	-0.0355	-0.357	0.153	0.0545
23022	KIAA0992 || palladin (1)	-0.03	-0.21	0.03	0.13	0.46	0.057	-0.18	0.185	7.15e-09	-0.11	-0.185
23023	TMCC1 || transmembrane and coiled-coil domains 1 (1)	-0.01	-0.19	0.06	0.01	-2.53e-08	0.197	-0.03	-0.155	1.06	0.7	0.155
23028	AOF2 || amine oxidase (flavin containing) domain 2 (1)	-0.265	-0.145	0.145	0.795	-0.11	0.377	-7.15e-09	0.225	-0.115	0.44	-0.225
23029	KIAA0117 || KIAA0117 protein (2)	0.175	0.315	-0.325	-0.175	0.475	0.127	-1.97	0.142	0.09	-0.25	-0.142
23030	JMJD2B || jumonji domain containing 2B (1)	0.4	0.21	-0.21	-1.13	0.5	-0.173	1.56	-0.328	-0.09	-0.1	-0.297
23032	USP33 || ubiquitin specific protease 33 (1)	-0.07	-0.07	0.07	0.75	0.643	0.61	-1.1	0.1	0.423	-0.442	0.335
23036	ZNF292 || zinc finger protein 292 (2)	-0.01	-0.01	0.01	0.77	0.515	0.197	-0.22	0.642	0.645	-0.47	-1.03
23039	XPO7 || exportin 7 (1)	-0.375	0.105	-0.015	0.015	-0.257	-2.27e-08	-0.137	0.187	-0.317	-0.317	-0.653
23041	KIAA1040 || KIAA1040 protein (1)	-0.23	-0.04	0.04	0.13	0.164	-0.139	0.0242	0.0525	0.119	0.814	0.168
23042	KIAA0251 || KIAA0251 protein (1)	0.1	-0.22	-0.1	0.16	0.44	-0.043	-0.12	-0.21	0.38	5.96e-10	0.21
23045	KIAA0826 || KIAA0826 (1)	0.3	-0.03	0.03	-0.26	1.07	0.436	0.239	0.0975	0.399	-0.551	0.0275
23047	APRIN || androgen-induced proliferation inhibitor (2)	0.29	-0.59	0.03	-0.03	0.35	0.074	0.045	0.595	1.07e-08	-0.07	-0.01
23049	SMG1 || PI-3-kinase-related kinase SMG-1 (11)	-0.553	-0.23	0.56	0.23	0.26	0.257	-0.21	0.165	-0.598	0.24	-0.412
2305	FOXM1 || forkhead box M1 (1)	0.01	-0.01	-0.17	0.32	0.29	-0.143	1.07e-08	0.0625	0.53	-0.01	-0.0625
23051	ZHX3 || zinc fingers and homeoboxes 3 (2)	0.16	0.475	-0.54	-0.16	0.267	-0.0765	0.436	0.154	0.0765	-0.874	-0.201
23052	KIAA0830 || KIAA0830 protein (2)	-0.43	-0.31	0.31	1.16	0.173	1.55e-08	-0.567	0.42	0.078	-0.207	-0.42
23053	KIAA0913 || KIAA0913 (1)	0.445	0.295	-0.295	-0.695	0.24	-0.363	1.03	-0.06	-0.09	-0.04	0.06
23054	NCOA6 || nuclear receptor coactivator 6 (2)	0.02	0.34	-0.36	-0.02	-1.27	0.077	-0.545	-0.16	3.58e-09	0.07	-0.615
23059	CLUAP1 || clusterin associated protein 1 (1)	0.33	0.07	-0.24	-0.07	0.43	0.537	-1.07e-08	0.822	0.41	-0.21	-0.418
23060	ZNF609 || zinc finger protein 609 (2)	0.0725	-0.0725	-0.662	0.0975	-0.187	-0.135	0.468	0.127	0.358	-0.0216	0.507
23061	KIAA0676 || KIAA0676 protein (1)	0.355	0.065	-0.405	-0.065	0.1	-0.373	0.07	-0.643	0.27	-0.33	0.507
23062	GGA2 || golgi associated, gamma adaptin ear containing, ARF binding protein 2 (5)	-0.301	-0.0425	0.0425	0.426	-0.267	0.214	0.29	-0.248	3.58e-09	-0.5	-0.518
23063	KIAA0261 || KIAA0261 (2)	-2.43e-08	-2.32e-08	-1.63	0.655	-0.15	0.142	-0.495	-0.11	4.77e-09	0.82	0.11
23065	KIAA0090 || KIAA0090 (1)	-0.03	0.06	-0.66	0.03	0.494	0.086	-0.111	0.544	0.319	-0.606	0.275
23067	KIAA1076 || KIAA1076 protein (2)	0.652	0.242	-0.242	-0.312	2.95e-08	-0.358	0.22	0.035	-0.15	0.085	-0.035
23076	KIAA0179 || KIAA0179 (2)	0.085	-0.145	-0.085	0.255	0.615	-0.093	0.18	-0.372	-0.01	-0.235	0.372
23078	KIAA0564 || KIAA0564 protein (1)	-0.055	0.055	-0.075	0.325	1.12	0.487	-8.34e-09	1.15	0.62	-0.44	0.61
23080	KIAA0241 || KIAA0241 protein (2)	0.113	-0.113	-0.733	1.13	0.303	0.395	-0.502	0.14	-0.0316	0.0634	-0.12
23082	PPRC1 || peroxisome proliferative activated receptor, gamma, coactivator-related 1 (1)	0.215	0.175	-0.485	-0.175	0.45	-0.023	1.79e-09	-0.938	-0.095	0.19	-0.0875
2309	FOXO3A || forkhead box O3A (2)	0.005	-0.005	-0.56	0.075	-0.067	1.79e-08	-0.027	-0.0255	0.178	0.073	-0.425
23091	KIAA0853 || KIAA0853 (2)	-0.055	0.055	-0.185	0.165	-0.58	-0.553	3.58e-09	0.06	-0.79	0.07	-0.06
23093	KIAA0998 || KIAA0998 (1)	-4.47e-10	-0.44	0.3	0	0.16	0.127	0.45	-0.03	1.67e-08	-0.08	0.03
23095	KIF1B || kinesin family member 1B (26)	0.0025	-0.343	-0.0025	0.372	0.15	0.219	5.53e-09	-0.075	-0.187	0.0147	0.075
23099	ZNF297B || zinc finger protein 297B (2)	-0.07	-0.13	0.07	1.64	-1.58e-08	0.092	-0.175	0.182	0.085	-0.86	-0.688
231	AKR1B1 || aldo-keto reductase family 1, member B1 (aldose reductase) (2)	-0.16	0.16	0.43	-0.245	-0.871	0.071	0.394	-0.748	-0.756	0.284	-0.228
23107	MRPS27 || mitochondrial ribosomal protein S27 (2)	-0.517	-0.0825	0.182	0.0825	-0.39	0.057	-0.26	-0.11	0.14	0.015	0.11
23112	TNRC6B || trinucleotide repeat containing 6B (1)	0.185	0.135	-0.575	-0.135	2.24e-08	-0.098	0.675	-0.267	0.08	-0.235	-0.246
23117	LOC23117 || KIAA0220-like protein (1)	0.185	0.105	-0.105	-0.305	0.92	0.107	0.43	-2.03e-08	0.66	-0.45	-1.16e-08
23118	MAP3K7IP2 || mitogen-activated protein kinase kinase kinase 7 interacting protein 2 (1)	-0.075	-0.405	0.075	0.455	0.17	0.047	-0.57	0.22	-0.52	-1.79e-09	-0.22
23119	HIC2 || hypermethylated in cancer 2 (1)	0.07	-0.07	0.11	-1.18	0.26	-0.433	0.115	-0.05	-0.14	0.01	0.05
23126	POGZ || pogo transposable element with ZNF domain (1)	0.085	0.045	-0.045	-0.095	0.24	0.047	0.85	0.26	-0.485	0.55	0.905
23130	KIAA0404 || KIAA0404 protein (1)	0.04	-0.27	-4.14e-08	0	-0.19	-0.673	0.95	-0.765	-0.49	-1.2	0.765
23133	PHF8 || PHD finger protein 8 (1)	0.465	0.035	-0.265	-0.035	0.203	7.15e-09	0.713	-0.018	-0.197	-0.417	0.392
23135	JMJD3 || jumonji domain containing 3 (2)	0.122	0.343	-0.122	-0.247	-0.155	-0.748	0.57	0.158	-0.635	-1.79e-09	-0.158
23136	EPB41L3 || erythrocyte membrane protein band 4.1-like 3 (2)	-0.345	-0.065	0.065	1.09	0.265	0.142	-0.51	0.213	-0.247	-4.17e-09	-0.123
23139	MAST2 || microtubule associated serine/threonine kinase 2 (1)	0.465	0.135	-0.615	-0.135	0.003	2.5e-08	0.293	-0.168	-0.597	-0.667	0.392
23141	KIAA0692 || KIAA0692 protein (2)	-0.0275	-0.0575	0.0275	0.362	0.165	0.247	-0.105	0.89	-0.225	-0.045	-0.365
23142	KIAA0276 || KIAA0276 protein (1)	0.1	-0.44	2.68e-09	0	-0.0985	0.0285	-0.118	0.195	-0.0285	0.112	-0.195
23144	ZC3HDC3 || zinc finger CCCH-type domain containing 3 (1)	0.25	0.27	-0.25	-1.13	3.28e-09	-0.353	1.24	-0.56	-0.2	-0.15	0.56
23145	KIAA0543 || KIAA0543 protein (1)	0.24	-0.13	-0.21	0.13	0.304	-0.229	1.05	0.217	0.229	-3.07	-0.0365
23154	NCDN || neurochondrin (1)	0.11	2.45e-08	-0.08	0	-0.05	-0.253	0.59	-0.175	-0.17	-1.85e-08	0.175
23155	MCLC || Mid-1-related chloride channel 1 (2)	-0.04	1.5e-08	0.51	1.3e-08	0.375	0.377	-0.42	-0.0025	0.235	-4.95e-08	0.0025
23158	KIAA0882 || KIAA0882 protein (1)	0.015	-0.015	-0.355	0.075	0.36	-0.303	-0.68	-0.12	0.65	0.46	0.12
23160	WDR43 || WD repeat domain 43 (2)	-0.185	-0.015	0.015	0.115	0.01	-0.303	-0.29	0.567	-0.14	1.64e-09	0.072
23162	MAPK8IP3 || mitogen-activated protein kinase 8 interacting protein 3 (1)	0.37	0.41	-0.37	-1.38	1.15	-0.243	1.7	0.18	-0.15	-0.8	0.12
23163	GGA3 || golgi associated, gamma adaptin ear containing, ARF binding protein 3 (1)	0.07	-0.07	-0.16	0.43	2.98e-10	-0.033	0.07	-0.0615	-0.96	-0.17	0.0615
23164	M-RIP || myosin phosphatase-Rho interacting protein (1)	0.08	0.1	-0.08	-0.75	0.31	-0.473	-0.15	-0.005	-0.235	-1.79e-09	0.005
23165	NUP205 || nucleoporin 205kDa (1)	0.19	-0.04	2.09e-09	0	0.09	0.217	0.17	0.28	-0.02	0.46	2.18e-08
23167	KIAA0143 || KIAA0143 protein (1)	-0.09	-0.28	0.09	0.63	0.25	0.327	0.65	0.002	0.31	-0.1	-0.328
23168	KIAA0252 || KIAA0252 (2)	-0.0875	-0.0625	0.0625	0.188	0.118	-1.19e-08	0.188	-0.328	0.213	-0.662	0.158
23169	SLC35D1 || solute carrier family 35 (UDP-glucuronic acid/UDP-N-acetylgalactosamine dual transporter), member D1 (1)	-0.175	-0.385	0.175	0.945	-0.02	-0.143	-0.24	0.022	0.1	0.23	0.102
2317	FLNB || filamin B, beta (actin binding protein 278) (1)	0.21	-0.11	6.26e-09	0	0.105	-0.853	-0.41	-0.208	-1.08	-3.74	0.202
23171	GPD1L || glycerol-3-phosphate dehydrogenase 1-like (1)	3.77e-08	-0.09	0.52	0	-0.71	0.037	-0.42	-0.018	-0.15	2.98e-10	-0.238
23172	KIAA0157 || KIAA0157 (1)	-0.09	3.65e-09	0.04	1.64e-09	0.183	-8.34e-09	-1.18	0.32	-0.467	-0.017	-0.32
23173	METAP1 || methionyl aminopeptidase 1 (1)	-0.165	-0.145	0.155	0.145	-1.22e-08	0.407	-0.77	1.17	-0.13	0.15	-0.562
23176	SEPT8 || septin 8 (2)	-0.065	-0.375	0.065	0.885	0.143	1.31e-08	-0.347	-0.427	0.128	-0.152	-0.0225
23177	KIAA0582 || KIAA0582 (2)	-0.163	0.0075	-0.0075	0.623	-0.0717	-0.22	0.338	0.0675	0.128	-0.417	-0.398
23178	PASK || PAS domain containing serine/threonine kinase (1)	-1.24e-08	-1.12e-08	-0.38	0	0.141	-0.0515	-0.0685	0.23	0.0715	0.0515	-0.2
23181	C21orf106 || chromosome 21 open reading frame 106 (18)	1.38	-1.29	0.141	-0.141	0.332	-0.324	-0.201	0.015	-0.926	-0.323	-0.015
23184	MESDC2 || mesoderm development candidate 2 (1)	0.06	-0.19	-0.06	0.89	-0.075	-0.288	0.5	-0.185	0.43	0.075	0.204
23185	KIAA0217 || KIAA0217 (2)	-0.0425	-0.0525	0.0425	0.138	0.035	0.182	0.135	0.102	-1.49e-10	0.015	-0.0275
23187	PHLDB1 || pleckstrin homology-like domain, family B, member 1 (1)	0.24	0.19	-0.19	-1.03	-7.45e-09	-0.383	0.16	-0.0725	-0.297	-1.39	0.0725
23189	ANKRD15 || ankyrin repeat domain 15 (2)	0.133	0.253	-0.247	-0.133	-0.02	-0.448	-0.135	-0.441	-5.96e-09	-0.495	-0.251
2319	FLOT2 || flotillin 2 (1)	0.275	0.035	-0.035	-0.125	-0.83	-0.823	4.77e-09	-0.28	-0.59	-0.65	0.28
23190	UBXD2 || UBX domain containing 2 (1)	1.86e-08	-0.21	0.23	0	0.15	-0.083	-0.84	0.02	0.22	0.2	0.02
23191	CYFIP1 || cytoplasmic FMR1 interacting protein 1 (1)	0.12	-0.12	-0.39	0.29	0.2	0.057	-0.18	0.17	-0.105	0.34	0.664
23193	GANAB || glucosidase, alpha; neutral AB (1)	0.315	0.525	-0.315	-0.515	-0.422	0.165	0.508	-0.2	0.138	-0.432	0.2
23196	C9orf10 || chromosome 9 open reading frame 10 (2)	-0.06	-0.11	0.06	1.15	-0.405	-0.316	8.34e-09	-0.746	0.3	-0.84	-0.196
23199	KIAA0182 || KIAA0182 protein (3)	0.395	0.205	-0.205	-0.48	0.54	1.31e-08	-0.294	-0.176	-0.027	-1.03	0.176
23201	KIAA0280 || KIAA0280 protein (2)	0.455	0.215	-0.595	-0.215	0.14	-0.273	-1.14	0.14	0.06	-1.01e-08	0.554
23203	PMPCA || peptidase (mitochondrial processing) alpha (1)	-0.07	0.09	0.07	-0.08	0.03	-0.153	0.95	-0.11	0.27	-0.07	-0.16
23207	PLEKHM2 || pleckstrin homology domain containing, family M (with RUN domain) member 2 (3)	0.142	-0.0475	0.0475	-0.36	0.01	-0.073	0.78	0.09	-0.343	-5.36e-09	-0.09
23210	PTDSR || phosphatidylserine receptor (2)	1.39	0.16	-0.16	-0.74	0.023	5.96e-09	-0.077	-0.343	0.258	-0.622	0.233
23211	C19orf7 || chromosome 19 open reading frame 7 (2)	0.677	0.578	-0.603	-0.578	0.165	-0.513	6.56e-09	0.725	-0.29	-0.385	0.234
23212	RRS1 || RRS1 ribosome biogenesis regulator homolog (S. cerevisiae) (1)	0.395	0.135	-0.135	-0.905	1.16	0.127	-1.04	0.472	0.3	-0.28	-0.118
23214	XPO6 || exportin 6 (1)	-0.105	-0.045	0.045	0.275	-1.02	-0.753	0.1	-0.695	0.39	0.51	0.105
23215	BAT2D1 || BAT2 domain containing 1 (1)	-0.335	0.195	-0.195	0.845	0.298	0.685	0.498	-0.138	-0.197	-0.792	-0.298
23216	TBC1D1 || TBC1 (tre-2/USP6, BUB2, cdc16) domain family, member 1 (1)	-0.03	0.03	0.1	-0.04	-0.2	-0.263	0.45	0.217	-2.38e-09	-0.01	0.557
23218	NBEAL2 || neurobeachin-like 2 (4)	0.045	0.07	-0.065	-0.045	0.345	0.392	1.26	0.0255	-0.052	2.92e-08	-0.0255
23219	FBXO28 || F-box protein 28 (1)	-0.015	-0.295	0.015	0.035	0.59	0.387	-0.07	-0.14	-2.15e-08	0.35	0.2
23225	NUP210 || nucleoporin 210kDa (1)	0.255	-0.075	0.065	-0.065	0.31	-0.793	0.45	-0.568	-0.84	-0.45	0.292
23230	VPS13A || vacuolar protein sorting 13A (yeast) (4)	0.005	-0.005	-1.22	0.485	0.51	0.127	5.01e-08	0.575	0.274	-1.34	-0.435
23231	KIAA0746 || KIAA0746 protein (1)	0.15	-0.17	-0.15	0.49	0.853	2.09e-09	0.053	-0.06	0.193	-0.647	0.25
23234	DNAJC9 || DnaJ (Hsp40) homolog, subfamily C, member 9 (2)	-0.145	0.035	0.425	-0.035	-0.6	0.552	0.1	0.0875	2.38e-09	-0.685	-0.177
23240	KIAA0922 || KIAA0922 protein (1)	-0.215	-0.535	0.315	0.215	0.63	0.137	-0.62	-0.345	0.02	-0.02	0.065
23246	BOP1 || block of proliferation 1 (4)	-0.031	0.031	0.188	-0.086	-0.277	-0.82	0.866	-0.903	-0.439	0.078	0.903
23248	KIAA0460 || KIAA0460 (1)	0.705	0.415	-0.545	-0.415	0.06	-0.413	2.15e-08	1.08	0.06	-0.28	-0.393
23252	KIAA0459 || KIAA0459 protein (1)	0.065	-0.075	0.225	-0.065	0.153	9.54e-09	0.723	0.582	0.413	0.263	0.372
23254	KIAA1026 || kazrin (2)	0.0325	0.0275	-0.0275	-0.0875	2e-08	-0.158	1.09	-0.0225	0.29	-0.765	0.0225
23256	SCFD1 || sec1 family domain containing 1 (2)	-0.512	-0.422	0.422	0.588	0.655	1.32	-0.55	0.955	0.12	0.67	-0.545
23258	RAB6IP1 || RAB6 interacting protein 1 (1)	0.03	-0.04	-0.03	0.44	-0.04	-0.093	0.26	0.065	0.25	0.2	-0.065
23259	DDHD2 || DDHD domain containing 2 (1)	0.005	-0.065	-0.005	0.555	-0.06	0.667	-0.1	-0.375	-4.77e-09	-0.55	-0.825
23261	CAMTA1 || calmodulin binding transcription activator 1 (3)	-0.12	0.01	-0.01	0.065	0.038	0.383	-0.584	0.297	0.008	-1.12e-11	-0.308
23265	EXOC7 || exocyst complex component 7 (3)	0.43	0.43	-0.52	-0.43	0.246	-0.39	0.24	-0.105	1.86e-08	-0.267	0.105
23266	LPHN2 || latrophilin 2 (1)	-0.2	0.2	-0.43	0.2	-0.075	0.102	-0.405	0.0975	5.96e-09	-0.655	-0.0975
23268	DNMBP || dynamin binding protein (1)	0.125	-0.535	-0.075	0.075	0.4	-0.093	0.29	-0.135	3.58e-09	-0.3	0.135
23269	MGA || MAX gene associated (1)	0.01	-0.35	-6.86e-09	0	0.46	-0.393	0.15	0.69	-0.325	0.17	0.375
23270	TSPYL4 || TSPY-like 4 (1)	0.13	-0.1	-0.26	0.1	0.0384	-0.285	-0.642	-0.153	-0.0216	-0.442	-0.433
23272	RAP140 || retinoblastoma-associated protein 140 (3)	-1.32	0.57	-0.57	0.815	0.337	0.819	0.0235	0.424	-0.0235	-3.22	-0.169
23274	KIAA0350 || KIAA0350 protein (2)	0.045	-0.045	-0.355	0.355	0.59	-0.483	1.63	0.565	1.67e-08	-2.31	-0.406
23275	POFUT2 || protein O-fucosyltransferase 2 (1)	0.305	0.375	-0.415	-0.305	-0.27	-0.523	2.62e-08	0.105	-0.33	0.02	-0.105
23277	KIAA0664 || KIAA0664 protein (1)	0.175	0.295	-0.175	-1.2	0.65	-0.563	1.63	-1.72	-0.13	-0.37	0.034
23279	NUP160 || nucleoporin 160kDa (2)	-0.372	-0.0975	0.0975	0.477	-0.395	0.012	-0.18	0.25	-0.575	0.085	-0.22
23291	FBXW11 || F-box and WD-40 domain protein 11 (1)	0.025	-0.025	-0.105	0.355	0.18	-0.253	-0.28	-0.0845	-0.265	0.59	-0.0045
23293	C17orf31 || chromosome 17 open reading frame 31 (1)	0.215	0.035	-0.035	-0.755	0.56	-0.043	1.16	0.08	0.12	-0.04	-0.08
23295	MGRN1 || mahogunin, ring finger 1 (2)	0.13	0.275	-0.13	-0.17	0.105	-0.673	0.215	-0.42	4.1e-10	-0.42	0.295
23300	KIAA0431 || KIAA0431 protein (2)	-0.0525	0.0525	-0.652	0.233	0.065	0.027	-0.275	0.0625	-0.08	-0.62	-0.0625
23301	EHBP1 || EH domain binding protein 1 (1)	0.175	-0.005	0.005	-0.025	0.565	0.292	0.665	0.417	0.055	-0.585	-0.023
23306	KIAA0286 || KIAA0286 protein (1)	0.025	-0.105	-0.025	0.595	-0.04	0.127	-0.35	-0.133	0.2	0.13	0.007
23309	SIN3B || SIN3 homolog B, transcription regulator (yeast) (1)	0.41	0.1	-0.1	-0.46	0.465	-0.278	0.875	-0.358	-0.185	-0.315	0.392
23310	KIAA0056 || KIAA0056 protein (1)	-0.01	0.01	-0.08	0.11	0.4	0.167	-0.09	0.742	-0.35	-5.96e-10	-0.048
23313	C22orf9 || chromosome 22 open reading frame 9 (2)	0.4	0.43	-0.46	-0.4	-2.53e-08	-0.693	-0.1	-0.172	-0.03	-0.72	0.128
23321	TRIM2 || tripartite motif-containing 2 (1)	-0.19	-0.66	0.24	0.19	1.16e-08	-0.313	-0.41	0.082	0.06	0.27	0.582
23326	USP22 || ubiquitin specific protease 22 (2)	-0.0375	-0.168	0.0375	0.323	0.275	-0.258	0.49	-0.723	-0.075	1.13e-08	0.302
23335	WDR7 || WD repeat domain 7 (1)	-0.19	-0.38	0.54	0.19	0.604	0.271	-0.181	-0.166	-0.156	0.154	0.144
23339	VPS39 || vacuolar protein sorting 39 (yeast) (1)	-0.12	0.12	-0.36	0.17	-0.23	-0.353	0.12	-0.015	0.01	-0.5	0.015
23341	KIAA0962 || KIAA0962 protein (1)	0.38	0.12	-0.16	-0.12	0.351	0.0685	-0.399	-0.095	-0.0685	-0.0785	-0.515
23350	SR140 || U2-associated SR140 protein (1)	0.225	-0.035	-0.445	0.035	0.63	0.017	-0.07	0.145	0.68	5.54e-08	-0.145
23351	KIAA0323 || KIAA0323 (1)	-0.11	-0.06	0.22	0.06	-0.29	0.277	0.35	0.275	0.2	-0.58	-0.275
23352	RBAF600 || retinoblastoma-associated factor 600 (1)	0.215	0.085	-0.085	-0.165	0.137	0.0835	0.337	0.837	-0.243	-0.0835	0.527
23353	UNC84A || unc-84 homolog A (C. elegans) (1)	-0.155	0.155	-1.14	0.205	0.49	0.097	-1.03	-0.178	-0.26	7.75e-09	0.232
23355	KIAA0804 || KIAA0804 (1)	-0.01	-0.21	0.01	0.19	0.3	0.087	0.22	0.052	0.6	-1.13e-08	0.362
23358	USP24 || ubiquitin specific protease 24 (1)	0.105	-0.155	-0.105	0.285	0.433	1.79e-09	-0.707	0.07	-0.837	-0.657	-0.07
23360	FNBP4 || formin binding protein 4 (2)	-0.292	0.292	-0.482	0.463	-0.08	0.147	0.01	-0.15	-4.77e-09	-0.965	-0.06
23367	LARP || la related protein (1)	0.46	-0.03	-0.49	0.03	-0.27	-0.033	0.35	-1.19e-08	0.26	-1.13e-08	-0.49
23376	KIAA0776 || KIAA0776 (1)	0.065	-0.065	-0.435	0.365	0.5	0.057	-0.51	-0.1	0.36	-2.61e-10	0.28
23378	KIAA0409 || KIAA0409 protein (2)	0.158	-0.138	-0.0525	0.0525	0.225	-0.078	-0.195	-0.703	0.28	0.08	-0.063
23379	KIAA0947 || KIAA0947 protein (2)	-0.085	-0.17	0.085	0.585	0.038	0	-0.127	0.082	-0.142	-0.177	-0.133
23381	EST1B || Est1p-like protein B (1)	0.405	0.215	-0.215	-0.545	-0.06	-0.043	1.49	-0.015	0.08	-2.32e-08	0.015
23383	KIAA0892 || KIAA0892 (1)	-0.125	0.015	0.115	-0.015	0.04	-0.393	0.3	-0.09	-0.52	-0.65	-0.13
23385	NCSTN || nicastrin (1)	0.35	0.7	-0.53	-0.35	-0.015	-0.228	-0.015	-0.451	0.005	-0.005	0.875
23386	NUDCD3 || NudC domain containing 3 (1)	0.06	-0.27	-0.06	0.19	-0.29	-0.493	0.12	-1.24	-2.15e-08	0.07	-0.12
23387	KIAA0999 || KIAA0999 protein (1)	0.115	-0.115	-0.175	0.195	-0.692	0.0654	0.488	0.01	-0.182	-0.0717	-0.01
23389	THRAP2 || thyroid hormone receptor associated protein 2 (2)	0.188	-0.0025	-1.31	0.0025	0.705	0.092	-0.675	0.755	0.06	0.375	0.1
2339	FNTA || farnesyltransferase, CAAX box, alpha (2)	-0.258	-0.188	0.188	0.297	0.255	0.017	-0.45	0.205	0.055	-0.36	-0.205
23392	KIAA0368 || KIAA0368 (2)	0.08	-0.08	-1.45	0.56	0.71	-0.303	-0.05	-0.17	0.555	0.05	0.17
23394	ADNP || activity-dependent neuroprotector (2)	0.04	-0.04	-0.8	0.55	0.103	-5.96e-09	0.113	-0.05	-1.02	-0.437	0.05
23395	LARS2 || leucyl-tRNA synthetase 2, mitochondrial (1)	9.09e-09	-0.22	0.24	0	-0.14	0.047	0.05	-0.265	5.01e-08	-0.33	0.265
23396	PIP5K1C || phosphatidylinositol-4-phosphate 5-kinase, type I, gamma (1)	0.475	0.015	-0.015	-0.765	0.4	0.527	-0.2	-0.11	-0.34	-0.27	0.11
23397	BRRN1 || barren homolog (Drosophila) (1)	0.26	4.83e-08	-0.05	0	-0.07	0.147	-0.82	0.35	-0.15	-5.9e-08	-0.35
23399	DULLARD || dullard homolog (Xenopus laevis) (2)	0.56	0.67	-0.56	-1.51	-1.33	-0.613	0.56	0.05	0.14	-0.255	-1.01
23400	ATP13A2 || ATPase type 13A2 (1)	-0.34	0.22	0.22	-0.22	-0.43	-0.433	0.65	0.0975	0.03	0	-0.0975
23403	FBXO46 || F-box protein 46 (2)	0.22	0.13	-0.13	-0.575	-0.56	-0.328	0.18	-0.015	-0.01	0.49	0.015
23404	EXOSC2 || exosome component 2 (1)	0.145	0.065	-0.065	-0.505	0.233	-2.98e-09	-1.01	0.17	0.063	-0.187	0.03
23405	DICER1 || Dicer1, Dcr-1 homolog (Drosophila) (1)	-0.115	-0.645	0.115	0.445	0.528	0.532	0.0817	-0.029	-0.329	-1.01	-0.599
23406	COTL1 || coactosin-like 1 (Dictyostelium) (1)	0.17	0.3	-0.17	-0.43	-0.492	-0.605	-0.0817	-0.21	0.448	-0.112	0.01
23408	SIRT5 || sirtuin (silent mating type information regulation 2 homolog) 5 (S. cerevisiae) (2)	-0.04	-0.11	0.04	0.14	0.36	0.197	0.165	0.016	0.195	-2.02	-0.062
23409	SIRT4 || sirtuin (silent mating type information regulation 2 homolog) 4 (S. cerevisiae) (1)	-0.115	0.025	0.215	-0.025	-0.21	-0.103	-0.53	-0.143	-2.62e-08	0.23	-0.803
23410	SIRT3 || sirtuin (silent mating type information regulation 2 homolog) 3 (S. cerevisiae) (2)	-0.17	0.17	0.22	-0.48	-0.19	-0.008	0.47	-0.237	0.2	3.58e-09	0.237
23411	SIRT1 || sirtuin (silent mating type information regulation 2 homolog) 1 (S. cerevisiae) (1)	-0.025	0.025	-0.135	0.095	0.14	-0.293	-0.04	0.072	-2.86e-08	0.08	-0.488
23412	COMMD3 || COMM domain containing 3 (1)	-0.085	0.085	0.245	-0.105	0.189	0.356	-0.341	0.165	0.439	0.619	-0.165
23420	NOMO1 || NODAL modulator 1 (1)	0.04	-0.04	-0.47	0.19	-2.98e-10	-0.143	-0.51	-0.048	0.06	0.13	0.132
23421	ITGB3BP || integrin beta 3 binding protein (beta3-endonexin) (3)	-0.385	0.035	-0.035	0.215	0.417	0.56	-1.14	0.418	0.203	0.317	-0.418
23423	TMED3 || transmembrane emp24 domain containing 3 (2)	0.21	0.175	-0.175	-0.415	-0.77	0.127	0.055	-0.0025	-0.135	-0.545	0.0025
23432	GPR161 || G protein-coupled receptor 161 (3)	-0.01	0.307	0.01	-0.03	-0.15	-0.473	0.473	-0.533	-0.07	-1.25	0.227
23433	RHOQ || ras homolog gene family, member Q (2)	-0.465	-0.035	0.655	0.035	8.05e-09	0.452	-0.59	0.463	0.12	-1.48	-0.463
23435	TARDBP || TAR DNA binding protein (1)	-0.07	-0.48	0.07	1.09	-0.3	-0.023	-0.32	0.23	0.38	0.4	-6.86e-09
23438	HARSL || histidyl-tRNA synthetase-like (1)	-0.165	0.245	0.025	-0.025	0.37	0.277	-0.33	0.505	0.38	1.97e-08	0.055
23450	SF3B3 || splicing factor 3b, subunit 3, 130kDa (1)	0.14	-0.15	2.98e-09	0	0.11	0.207	-7.15e-09	-0.013	-0.06	0.32	1.11
23463	ICMT || isoprenylcysteine carboxyl methyltransferase (2)	-0.045	0.045	0.815	-0.115	-0.325	-0.313	1.67e-08	0.0305	0.01	-0.59	-0.209
23469	PHF3 || PHD finger protein 3 (1)	2.82e-08	-0.19	0.31	0	0.343	2.74e-08	-0.257	0.725	-0.057	0.003	0.255
23471	TRAM1 || translocation associated membrane protein 1 (2)	-0.09	-0.06	0.71	0.06	5.66e-09	0.047	-0.53	0.323	-0.025	0.125	-0.323
23474	ETHE1 || ethylmalonic encephalopathy 1 (1)	0.17	0.13	-0.13	-0.49	-0.67	-0.333	0.17	0.05	-0.09	-1.37e-08	-0.21
23475	QPRT || quinolinate phosphoribosyltransferase (nicotinate-nucleotide pyrophosphorylase (carboxylating)) (1)	0.04	0.12	-0.04	-0.57	-0.01	-0.113	1.76	-0.035	0.29	2.38e-09	0.035
23479	NIFUN || NifU-like N-terminal domain containing (2)	0.0725	0.177	-0.0725	-0.427	-0.2	0.387	-0.245	0.742	1.31e-08	0.565	-1.35
23480	SEC61G || Sec61 gamma subunit (1)	0.49	0.51	-0.49	-0.69	-0.17	0.357	1.19e-08	0.62	0.04	0.4	-0.6
23483	TGDS || TDP-glucose 4,6-dehydratase (2)	-0.782	-0.338	0.338	0.393	-0.29	0.527	-0.345	0.365	-0.005	-1.37e-08	-0.365
23484	LEPROTL1 || leptin receptor overlapping transcript-like 1 (2)	-0.22	-0.54	0.22	1.18	-0.207	2.98e-10	-0.097	-0.06	0.453	0.543	0.06
23492	CBX7 || chromobox homolog 7 (1)	0.115	0.095	-0.095	-0.505	0.54	-0.073	0.23	-0.01	0.37	-0.19	0.01
23505	RW1 || RW1 protein (2)	0.0125	-0.0125	-0.147	0.0175	0.54	0.222	-0.135	-0.045	-0.275	-1.87	0.045
23510	KCTD2 || potassium channel tetramerisation domain containing 2 (1)	-0.01	-8.87e-09	0.18	0	-0.322	-0.0447	-0.102	0.11	-0.0617	0.228	-0.21
23512	SUZ12 || suppressor of zeste 12 homolog (Drosophila) (1)	0.02	-0.02	-0.35	0.69	0.206	0.0827	-1.66	0.66	-0.994	0.326	-0.04
23513	SCRIB || scribbled homolog (Drosophila) (1)	0.06	0.09	-0.06	-0.41	-9.84e-09	-0.143	0.84	0.0425	-3.58e-09	-0.55	-0.0425
23514	KIAA0146 || KIAA0146 protein (2)	0.07	0.01	-0.72	-0.01	0.546	-0.0165	-0.153	0.137	0.791	0.286	0.112
23515	ZCWCC3 || zinc finger, CW type with coiled-coil domain 3 (1)	0.255	0.135	-0.235	-0.135	0.498	0.175	-0.972	0.675	-0.532	0.438	-0.675
23516	SLC39A14 || solute carrier family 39 (zinc transporter), member 14 (1)	-5.21e-09	0.1	-0.16	0	-0.05	0.107	-0.46	0.595	0.69	1.02	-0.135
23518	R3HDM || R3H domain (binds single-stranded nucleic acids) containing (1)	-0.08	0.08	-0.1	0.18	-0.335	-0.178	-3.28e-09	0.05	-0.407	0.39	-0.05
23524	SRRM2 || serine/arginine repetitive matrix 2 (1)	0.145	0.055	-0.055	-0.455	-0.437	-4.17e-08	0.913	-0.11	-0.167	-0.097	-0.0325
23527	CENTB2 || centaurin, beta 2 (1)	-0.11	-0.16	0.11	0.55	0.214	0.151	-0.0658	-0.318	0.314	-0.426	0.312
23528	ZNF281 || zinc finger protein 281 (1)	-0.16	-0.31	0.16	1.01	-0.432	0.0853	-0.762	-0.005	0.988	1.15	0.005
23530	NNT || nicotinamide nucleotide transhydrogenase (2)	0.0025	-0.307	-0.0025	0.297	0.35	0.232	-0.31	0.018	-0.133	0.325	0.01
23531	MMD || monocyte to macrophage differentiation-associated (1)	-0.06	-0.47	0.08	0.06	-3.87e-09	-0.263	-0.73	-0.425	0.32	0.92	0.425
23532	PRAME || preferentially expressed antigen in melanoma (1)	0.1	0.03	-0.03	-0.3	-0.087	1.19e-09	-1.21	-0.375	0.163	-0.027	-0.105
23534	TNPO3 || transportin 3 (1)	-0.33	-0.25	0.25	0.76	0.12	0.257	-0.63	-0.495	0.4	1.49e-08	0.19
23543	RBM9 || RNA binding motif protein 9 (2)	0.335	-0.335	-0.925	0.895	-0.265	0.187	-0.493	0.057	0.62	0.43	-0.047
23552	CCRK || cell cycle related kinase (3)	-0.396	0.011	0.401	-0.011	-0.717	-1.19e-09	0.373	-0.312	-0.94	-0.327	0.312
23557	SNAPAP || SNAP-associated protein (1)	-0.035	0.035	0.245	-0.275	-0.14	0.277	0.02	-0.01	-0.12	-1.49e-09	0.01
23558	WBP2 || WW domain binding protein 2 (2)	0.02	0.34	-0.02	-0.615	-0.187	-0.41	0.298	-0.595	-0.322	0.898	0.595
23559	WBP1 || WW domain binding protein 1 (2)	0.175	0.275	-0.175	-0.765	-0.16	-0.563	0.595	-0.678	-0.24	-0.165	-0.363
2356	FPGS || folylpolyglutamate synthase (4)	0.045	-0.045	0.045	-0.66	-0.157	-6.71e-10	1.1	-0.185	-0.239	-0.322	0.185
23564	DDAH2 || dimethylarginine dimethylaminohydrolase 2 (1)	0.03	0.59	-0.03	-0.39	-0.15	0.007	0.16	0.2	0.29	-1.11	-0.2
23567	ZNF346 || zinc finger protein 346 (5)	-0.384	-0.248	0.604	0.248	-0.675	-0.038	0.02	-0.511	-0.44	0.42	-0.132
23582	CCNDBP1 || cyclin D-type binding-protein 1 (6)	-0.592	-0.262	0.569	0.262	-0.262	0.919	0.2	-0.0615	-1.26e-08	-0.518	0.0125
23583	SMUG1 || single-strand selective monofunctional uracil DNA glycosylase (3)	0.24	0.29	-0.24	-0.517	-0.515	-0.075	0.465	0.144	-0.135	-7.75e-09	-0.253
23585	SMP1 || small membrane protein 1 (1)	0.26	3.88e-08	-0.59	0	0.167	0.153	-1.89	0.18	-0.324	0.366	-0.18
23587	DERP6 || S-phase 2 protein (4)	0.316	0.332	-0.316	-0.466	-0.8	-0.256	-0.025	0.187	1.31e-08	0.01	-0.187
23588	KLHDC2 || kelch domain containing 2 (2)	-0.278	-0.113	0.468	0.113	-0.47	0.262	1.05	0.035	-0.375	-1.16	-0.035
23589	CARHSP1 || calcium regulated heat stable protein 1, 24kDa (1)	0.3	0.32	-0.3	-0.79	-0.702	-0.105	0.638	-0.16	-0.0517	0.168	0.16
23590	TPRT || trans-prenyltransferase (2)	-0.37	-0.155	1.01	0.155	-0.22	0.282	0.045	0.338	-0.185	-3.52e-08	-0.338
23592	LEMD3 || LEM domain containing 3 (1)	-0.17	-0.12	0.12	0.21	0.223	-3.7e-08	-0.717	0.24	-0.437	0.073	-0.24
23593	HEBP2 || heme binding protein 2 (1)	0.39	0.29	-0.29	-0.7	0.6	0.277	-0.37	-0.18	0.77	0.31	0.58
23594	ORC6L || origin recognition complex, subunit 6 homolog-like (yeast) (1)	-0.16	0.16	-0.32	0.76	-0.11	-0.323	-2.13	-0.3	-0.39	3.58e-09	0.53
23595	ORC3L || origin recognition complex, subunit 3-like (yeast) (3)	1.94e-09	-0.127	0.205	1.04e-09	0.857	0.627	5.24e-09	0.15	0.597	0.204	-0.127
23598	ZNF278 || zinc finger protein 278 (4)	0.651	0.358	-0.358	-0.469	-0.245	-0.318	0.005	-0.209	-0.262	0.205	0.209
23603	CORO1C || coronin, actin binding protein, 1C (1)	0.055	-0.055	-0.245	0.745	-0.19	0.127	-1.09	1.13	1.15	1.14	0.227
23607	CD2AP || CD2-associated protein (1)	-0.395	-0.525	0.395	0.625	-0.04	0.207	-0.57	0.195	-2.62e-08	0.43	-0.195
23608	MKRN1 || makorin, ring finger protein, 1 (2)	0.045	-0.055	-0.045	0.265	0.073	2.03e-08	-0.137	0.417	0.708	0.468	0.027
23609	MKRN2 || makorin, ring finger protein, 2 (2)	-0.217	-0.0975	0.0975	0.417	-2.98e-10	0.237	-0.53	0.455	0.215	-0.59	-0.455
23612	PHLDA3 || pleckstrin homology-like domain, family A, member 3 (1)	-0.04	0.06	0.04	-0.97	0.118	-0.725	0.778	-0.25	-0.242	-0.702	0.09
23623	RUSC1 || RUN and SH3 domain containing 1 (1)	0.255	0.055	-0.055	-0.515	0.03	-0.433	1.13	-1.11	-0.41	-0.22	-1.02e-07
23625	MTVR1 || Mouse Mammary Turmor Virus Receptor homolog 1 (1)	0.39	-0.13	0.13	-1.02	-0.19	-0.383	1.2	0.125	0.22	5.96e-10	-0.125
23633	KPNA6 || karyopherin alpha 6 (importin alpha 7) (2)	0.06	-0.41	2.53e-08	0	-0.42	-0.023	0.145	0.292	0.22	-0.12	-0.292
23635	SSBP2 || single-stranded DNA binding protein 2 (1)	-0.02	-0.22	0.03	0.02	0.0384	0.485	-0.262	0.77	0.348	-0.262	-0.18
23636	NUP62 || nucleoporin 62kDa (2)	0.185	0.015	-0.415	-0.015	-0.045	-0.093	-0.255	-0.253	-1.19e-08	-0.06	-0.618
23637	RABGAP1 || RAB GTPase activating protein 1 (2)	0.145	-0.51	-0.145	0.245	0.19	0.187	-0.058	0.742	0.105	-0.07	-0.288
23640	HSPBP1 || hsp70-interacting protein (1)	0.14	0.12	-0.12	-0.6	-0.25	-0.403	1.34	-0.56	0.13	-0.13	0.56
23641	LDOC1 || leucine zipper, down-regulated in cancer 1 (1)	0.255	0.695	-0.305	-0.255	-0.502	0.325	0.228	0.035	-0.222	-0.292	-0.035
23644	RCD-8 || autoantigen (1)	0.285	0.195	-0.195	-1.11	0.08	-0.373	1.09	-0.163	-0.21	0.03	0.457
23645	PPP1R15A || protein phosphatase 1, regulatory (inhibitor) subunit 15A (1)	0.28	0.09	-0.09	-0.18	-1.49e-09	-0.083	-0.45	0.06	-0.33	-0.06	-0.31
23646	PLD3 || phospholipase D family, member 3 (1)	0.16	0.58	-0.16	-0.78	-0.5	-0.353	0.56	-0.045	-0.14	-8.94e-09	0.045
23647	ARFIP2 || ADP-ribosylation factor interacting protein 2 (arfaptin 2) (1)	0.215	0.255	-0.245	-0.215	-0.16	-0.503	0.43	-0.53	-0.36	0.07	0.53
23649	POLA2 || polymerase (DNA directed), alpha 2 (70kD subunit) (1)	0.07	0.42	-0.07	-0.51	9.24e-09	-0.183	0.14	-0.268	-0.26	-0.32	-0.058
23654	PLXNB2 || plexin B2 (1)	0.245	-0.015	0.015	-0.995	0.34	-0.173	1.13	-0.273	-1.19e-09	-0.67	0.647
23658	LSM5 || LSM5 homolog, U6 small nuclear RNA associated (S. cerevisiae) (2)	0.17	0.25	-0.17	-0.36	0.26	0.437	-0.46	0.718	-1.19e-09	0.62	-0.278
23659	LYPLA3 || lysophospholipase 3 (lysosomal phospholipase A2) (1)	0.055	0.205	-0.055	-0.385	0.05	-0.423	0.69	-0.24	0.22	-0.55	0.24
23660	ZFP95 || zinc finger protein 95 homolog (mouse) (1)	0.24	-0.07	-0.32	0.07	0.47	0.287	0.095	-0.221	-0.183	-0.44	0.221
23670	TMEM2 || transmembrane protein 2 (1)	-0.005	-0.275	0.025	0.005	0.56	0.277	-0.54	-0.11	0.01	-2.8e-08	0.11
23673	STX12 || syntaxin 12 (1)	-0.175	-0.255	0.215	0.175	0.43	0.537	-0.46	0.71	0.44	0.44	-0.47
23677	SH3BP4 || SH3-domain binding protein 4 (1)	0.02	-0.12	2.09e-09	0	1.76e-08	-0.093	-0.36	0.24	-0.09	-0.1	-0.24
23678	SGKL || serum/glucocorticoid regulated kinase-like (3)	-0.34	-0.26	0.26	1.14	1.83e-09	0.3	-0.817	-0.112	0.56	0.883	0.112
23683	PRKD3 || protein kinase D3 (1)	0.03	-0.09	-0.03	0.19	-0.15	0.377	-0.16	-0.245	-0.775	0.11	0.245
23710	GABARAPL1 || GABA(A) receptor-associated protein like 1 (1)	1.62e-08	0.1	-0.04	0	0.123	-1.79e-09	-0.622	-0.065	0.113	-0.157	-0.125
23729	CARKL || carbohydrate kinase-like (1)	0.1	-0.02	-0.25	0.02	-0.31	-0.693	0.14	-0.878	0.62	5.36e-09	0.462
23741	CRI1 || CREBBP/EP300 inhibitor 1 (1)	0.065	-0.065	-0.525	0.195	0.01	0.037	-1.1	0.285	2.15e-08	-0.2	-0.285
23760	PITPNB || phosphatidylinositol transfer protein, beta (2)	-0.515	-0.165	0.165	0.815	-3.73e-10	0.302	-0.95	0.0795	0.15	-0.06	-0.971
23761	PISD || phosphatidylserine decarboxylase (1)	-0.11	-0.18	0.11	0.16	2.71e-08	-0.193	-0.177	-0.347	-0.767	0.17	0.347
23770	FKBP8 || FK506 binding protein 8, 38kDa (1)	0.21	0.52	-0.21	-0.91	-0.55	-0.373	1.15	-0.0225	-1.64e-09	-0.06	0.0225
23779	ARHGAP8 || Rho GTPase activating protein 8 (2)	-0.0175	0.0175	0.398	-0.438	-0.43	-0.208	0.572	-0.0515	0.12	-0.18	0.0515
23786	BCL2L13 || BCL2-like 13 (apoptosis facilitator) (2)	-0.172	-0.247	0.172	0.407	0.388	-4.17e-09	0.093	0.0075	-0.212	-0.642	-0.0075
23787	MTCH1 || mitochondrial carrier homolog 1 (C. elegans) (2)	-0.23	-0.01	0.32	0.01	-0.3	0.407	1.47	-0.22	-0.41	0.23	0.22
23788	MTCH2 || mitochondrial carrier homolog 2 (C. elegans) (2)	-0.287	-0.627	0.792	0.287	0.105	-0.243	-0.54	0.265	0.07	8.94e-09	-0.265
24140	FTSJ1 || FtsJ homolog 1 (E. coli) (2)	-0.03	0.04	-0.035	0.03	-0.43	0.057	0.1	-0.132	2.38e-09	-0.655	0.038
24144	TFIP11 || tuftelin interacting protein 11 (1)	0.32	0.4	-0.32	-0.33	0.07	-0.103	0.37	0.005	1.19e-08	-0.03	-0.915
24146	CLDN15 || claudin 15 (4)	-0.05	0.64	0.05	-1.44	0.29	0.055	1.31	-0.163	-0.007	-0.195	0.163
24147	FJX1 || four jointed box 1 (Drosophila) (1)	0.24	0.55	-0.24	-0.81	2e-08	-0.433	0.03	-0.853	0.35	-0.29	0.367
245908	DEFB105A || defensin, beta 105A (1)	-0.355	-0.165	0.165	0.225	0.0407	0.00768	0.261	0.135	-0.0393	-3.37	0.265
246184	CDC26 || cell division cycle 26 (1)	0.575	0.465	-0.465	-0.995	-0.07	0.977	0.04	-0.078	0.15	1.79e-09	-0.248
246243	RNASEH1 || ribonuclease H1 (2)	0.015	-0.015	-0.635	0.815	0.55	0.677	-0.5	-0.005	0.585	-0.74	0.005
246721	POLR2J2 || DNA directed RNA polymerase II polypeptide J-related gene (2)	0.245	0.18	-0.18	-0.235	-1.76	-0.996	0.0325	-0.547	-0.507	-0.0325	0.0425
2475	FRAP1 || FK506 binding protein 12-rapamycin associated protein 1 (1)	-0.03	0.04	-0.02	0.02	1.35	0.487	-0.18	0.05	-2.86e-08	-0.25	-0.05
2483	FRG1 || FSHD region gene 1 (1)	0.135	0.445	-0.135	-0.205	-0.17	0.152	-0.28	0.105	-0.205	0.24	-0.105
2497	FTHL2 || ferritin, heavy polypeptide-like 2 (1)	-0.06	0.06	0.08	-0.3	-0.12	0.067	-0.47	0.032	2.38e-09	0.18	-0.368
25	ABL1 || v-abl Abelson murine leukemia viral oncogene homolog 1 (1)	0.505	0.025	-0.025	-0.605	-8.94e-10	-0.223	0.055	-0.209	-0.663	0.07	0.209
2501	FTHL8 || ferritin, heavy polypeptide-like 8 (1)	0.05	0.28	-0.3	-0.05	0.033	-4.77e-09	-0.557	-0.378	-0.057	0.203	0.122
2509	FTHP1 || ferritin, heavy polypeptide pseudogene 1 (1)	0.065	0.475	-0.065	-0.105	-0.06	0.017	-0.58	-0.065	0.01	-4.17e-09	0.065
2516	NR5A1 || nuclear receptor subfamily 5, group A, member 1 (1)	1.94e-09	-0.23	0.19	0	-0.34	-0.193	0.54	-0.385	-0.14	-0.63	0.385
2517	FUCA1 || fucosidase, alpha-L- 1, tissue (1)	-0.13	-0.43	0.13	0.38	-6.26e-09	0.097	-0.64	0.44	-0.12	0.06	-0.44
252839	TMEM9 || transmembrane protein 9 (2)	-0.0525	0.0525	0.0525	-0.542	-0.3	0.027	0.82	-0.205	-0.195	-5.36e-09	-0.466
252969	NEIL2 || nei like 2 (E. coli) (1)	0.115	0.195	-0.235	-0.115	-2.68e-09	-0.353	-0.14	-0.653	0.66	-0.2	-0.213
2534	FYN || FYN oncogene related to SRC, FGR, YES (3)	-0.285	0.298	-0.165	0.165	-0.617	-0.036	-0.303	-0.005	0.327	0.01	-0.073
2535	FZD2 || frizzled homolog 2 (Drosophila) (1)	0.065	0.295	-0.065	-0.715	0.1	-0.363	0.96	0.015	-2.38e-09	-0.57	-0.015
253512	SLC25A30 || solute carrier family 25, member 30 (1)	0.06	-0.15	-0.06	0.36	-0.05	-0.183	-0.23	-0.833	1.59	1.1	0.677
253558	LYCAT || lysocardiolipin acyltransferase (1)	0.415	0.135	-0.135	-0.155	-0.12	-0.083	-0.56	0.147	0.21	0.51	-0.183
253635	FLJ38348 || hypothetical protein FLJ38348 (1)	-0.08	0.08	-0.8	0.62	1.52e-08	0.087	-1.41	-0.108	0.45	-4.78	0.042
253639	ZNF620 || zinc finger protein 620 (1)	-0.3	-0.28	0.28	0.3	0.243	-6.56e-09	-0.727	0.277	0.043	-0.967	-0.593
253665	na || similar to Transcription elongation factor B polypeptide 2 (RNA polymerase II transcription factor SIII subunit B) (SIII p18) (Elongin B) (EloB) (Elongin 18 kDa subunit) (1)	0.565	0.265	-0.265	-0.785	-0.417	-4.17e-09	0.453	0.175	0.213	0.573	-0.175
253725	FAM21C || family with sequence similarity 21, member C (2)	-0.03	0.03	-0.16	0.43	0.39	0.402	2.38e-09	0.547	0.01	0.01	0.412
253738	EBF3 || early B-cell factor 3 (2)	-0.005	-0.05	0.005	0.205	-3.73e-10	0.097	-0.1	-0.11	0.45	0.05	0.11
253832	ZDHHC20 || zinc finger, DHHC domain containing 20 (1)	-0.02	-0.31	0.02	0.16	0.41	-0.063	4.17e-09	-0.35	0.395	0.94	0.35
253943	YTHDF3 || YTH domain family, member 3 (1)	-0.155	0.005	-0.005	0.055	-0.139	0.139	-0.339	1.05	-0.658	-0.408	-0.395
253981	LOC253981 || hypothetical protein LOC253981 (1)	-0.17	-0.27	0.17	0.41	0.46	0.017	-0.43	-0.32	0.48	1.37e-08	0.32
254170	FBXO33 || F-box protein 33 (1)	-0.275	-0.225	0.225	0.225	0.083	-2.5e-08	-0.857	-0.35	0.223	0.813	0.35
254225	KIAA1991 || hypothetical protein KIAA1991 (2)	0.345	-0.005	-0.145	0.005	-1.1e-08	0.047	0.225	0.187	0.18	0.125	0.042
254295	PHYHD1 || phytanoyl-CoA dioxygenase domain containing 1 (2)	-0.0125	0.0125	0.0675	-0.453	-0.415	-0.118	0.53	-0.448	-0.02	1.97e-08	-0.448
254359	ZDHHC24 || zinc finger, DHHC domain containing 24 (1)	0.26	0.05	-0.05	-0.65	-0.405	-0.308	1.53	0.03	0.075	-0.075	-0.03
254531	LOC254531 || PLSC domain containing protein (2)	0.265	0.695	-0.265	-0.415	-0.27	-0.733	0.3	-0.15	7.15e-09	-0.56	0.15
2547	XRCC6 || X-ray repair complementing defective repair in Chinese hamster cells 6 (Ku autoantigen, 70kDa) (3)	-0.015	-0.305	0.345	0.015	0.0925	1.4	-0.282	0.252	0.152	0.312	-1.53
254863	MGC40107 || hypothetical protein MGC40107 (1)	0.08	1.02e-08	-0.81	0	-1.13	-0.113	0.08	0.172	-0.25	0.08	-0.208
254887	ZDHHC23 || zinc finger, DHHC domain containing 23 (1)	0.16	-0.16	-0.19	0.39	0.23	0.127	-0.06	-0.073	0.03	-0.61	-0.113
2550	GABBR1 || gamma-aminobutyric acid (GABA) B receptor, 1 (2)	1.12	0.775	-0.775	-2.31	0.262	-0.121	0.426	-0.018	-0.121	-0.248	0.73
255231	MCOLN2 || mucolipin 2 (1)	0.25	-0.25	-0.44	0.34	-0.16	0.027	-1.91e-08	-0.205	0.45	0.24	0.205
255252	FLJ36812 || hypothetical protein FLJ36812 (1)	0.1	-0.36	-8.94e-10	0	0.225	0.062	-0.045	0.195	-0.135	-0.065	-0.195
2553	GABPB2 || GA binding protein transcription factor, beta subunit 2 (1)	0.17	-0.14	-0.09	0.09	-0.077	-1.31e-08	-0.077	0.34	0.043	0.023	-0.34
255488	IBRDC2 || IBR domain containing 2 (1)	-0.06	-0.59	0.06	0.63	0.123	-9.54e-09	0.013	0.135	-0.007	-0.687	-0.135
255520	ELMOD2 || ELMO domain containing 2 (1)	0.02	-0.38	1.34e-08	0	0.18	0.807	0	0.43	-0.01	0.53	0.45
255758	MGC33212 || hypothetical protein MGC33212 (1)	0.02	-0.02	-0.03	0.16	0.43	0.427	-0.44	0.512	0.21	-0.39	-0.078
255783	LOC255783 || hypothetical protein LOC255783 (1)	0.29	0.21	-0.21	-1.49	-0.64	-0.093	0.92	0.38	-0.04	8.94e-09	-0.38
255919	FLJ38101 || hypothetical protein FLJ38101 (2)	-0.55	-0.21	0.26	0.21	-5.16e-08	0.347	-0.28	0.332	-0.01	0.27	-0.348
256306	DKFZp762H185 || hypothetical protein DKFZp762H185 (2)	-0.045	0.045	0.1	-0.65	-0.19	-0.303	0.15	-0.1	0.29	-0.52	0.1
256364	EML3 || echinoderm microtubule associated protein like 3 (2)	0.185	0.075	-0.075	-0.51	-0.0416	-0.625	1.27	-0.365	0.428	-0.842	0.835
256714	FLJ14503 || hypothetical protein FLJ14503 (1)	0.37	-0.01	-5.57e-08	0	0.083	-1.55e-08	0.003	-0.0005	0.108	-0.157	0.26
256949	FLJ46061 || FLJ46061 protein (1)	-0.41	-1.36e-08	0.19	0	-0.095	-0.768	1.27	-0.608	-0.015	0.015	0.922
257039	na || similar to ribosomal protein S17 (1)	-4.34e-08	0.11	-0.79	0	0.138	0.865	-0.992	-0.13	-0.172	-0.412	0.13
257054	MGC25181 || hypothetical protein MGC25181 (1)	-0.24	0.24	0.27	-1.22	0.48	-0.513	1.46	-0.435	-0.185	-1.39	0.325
2571	GAD1 || glutamate decarboxylase 1 (brain, 67kDa) (11)	-0.0215	-0.0615	0.0215	0.316	0.443	0	0.181	0.214	-0.054	-0.152	0.03
257160	DKFZp547C195 || hypothetical protein DKFZp547C195 (1)	0.265	0.045	-0.645	-0.045	4.47e-09	0.097	-1.38	0.125	-0.1	-0.11	-0.125
257415	MGC40405 || hypothetical protein MGC40405 (1)	0.07	-0.07	-0.22	0.22	0.227	-0.117	-0.503	-0.18	0.117	-0.254	-0.58
25771	TBC1D22A || TBC1 domain family, member 22A (1)	-1.64e-09	-5.22e-10	0.15	-0.19	0.01	-0.243	0.33	-0.23	0.14	-0.55	-0.21
25776	PGEA1 || PKD2 interactor, golgi and endoplasmic reticulum associated 1 (1)	-0.02	0.04	-0.62	0.02	2.09e-09	0.007	0.11	0.065	0.46	0.05	-0.065
25777	UNC84B || unc-84 homolog B (C. elegans) (1)	0.48	0.34	-0.34	-1.1	0.69	-0.403	1.06	-0.346	0.03	-0.27	0.394
25782	RAB3-GAP150 || rab3 GTPase-activating protein, non-catalytic subunit (150kD) (1)	-4.34e-08	0.08	-0.26	0	0.525	0.412	-1.15	0.89	-0.265	-0.105	-0.33
25797	QPCT || glutaminyl-peptide cyclotransferase (glutaminyl cyclase) (2)	-0.588	-0.128	0.427	0.128	-2.77e-08	0.382	-0.465	0.198	-0.26	0.13	-0.198
25798	BRI3 || brain protein I3 (2)	0.105	0.255	-0.105	-0.525	2.47e-08	0.247	-0.51	0.065	-0.26	0.12	1.12
25799	ZNF324 || zinc finger protein 324 (1)	0.265	0.455	-0.265	-0.285	0.01	-0.353	0.59	-0.155	-0.01	-1.1	0.155
2580	GAK || cyclin G associated kinase (1)	1.62e-08	0.12	-0.73	0	-0.35	-0.643	0.86	-0.418	0.19	0.11	0.467
25800	SLC39A6 || solute carrier family 39 (zinc transporter), member 6 (1)	-0.33	-0.31	0.31	0.4	-0.02	0.077	-0.58	0.077	-4.77e-09	0.12	-0.693
25801	GCA || grancalcin, EF-hand calcium binding protein (2)	-0.25	-0.4	0.25	0.415	-0.287	0.335	-0.492	0.163	-0.255	-1.1	-0.163
25805	BAMBI || BMP and activin membrane-bound inhibitor homolog (Xenopus laevis) (2)	0.115	-0.115	0.465	-0.315	-0.31	-0.053	2.38e-09	-0.795	0.1	-0.14	-0.26
25807	C22orf3 || chromosome 22 open reading frame 3 (1)	0.28	0.21	-0.21	-1.08	0.13	-0.143	1.5	0.12	-0.03	-0.07	-0.12
25809	TTLL1 || tubulin tyrosine ligase-like family, member 1 (2)	0.045	0.335	-0.315	-0.045	0.133	-8.34e-09	-0.017	-0.233	0.343	-3.46	0.233
25814	ATXN10 || ataxin 10 (2)	0.0175	-0.0175	0.223	-0.273	0.19	0.037	-0.555	0.005	-0.11	-1.85e-08	-0.275
25819	CCRN4L || CCR4 carbon catabolite repression 4-like (S. cerevisiae) (1)	-0.135	0.025	-0.005	0.005	-0.47	-0.623	4.05e-08	-0.305	-0.42	-0.44	-0.84
25820	ARIH1 || ariadne homolog, ubiquitin-conjugating enzyme E2 binding protein, 1 (Drosophila) (2)	-0.138	-0.627	0.138	0.943	0.797	0.451	-0.836	0.032	-0.026	5.84e-09	-0.032
25822	DNAJB5 || DnaJ (Hsp40) homolog, subfamily B, member 5 (1)	0.435	0.145	-0.315	-0.145	0.06	-0.303	0.49	0.617	0.21	0.26	0.197
25824	PRDX5 || peroxiredoxin 5 (2)	0.312	0.598	-0.443	-0.312	-0.45	-0.048	0.495	0.06	0.035	-2.09e-08	-0.06
25825	BACE2 || beta-site APP-cleaving enzyme 2 (3)	-0.0585	0.0585	0.208	-0.118	-0.617	-0.18	-1.43e-08	0.165	0.31	0.133	-0.165
25827	FBXL2 || F-box and leucine-rich repeat protein 2 (1)	-0.31	-0.43	0.31	0.57	-0.0508	0.116	-0.611	0.14	0.389	-0.351	-0.14
25828	TXN2 || thioredoxin 2 (1)	0.385	0.175	-0.175	-0.775	-0.24	-0.483	0.6	-1.19	0.05	-5.36e-09	0.422
25829	C22orf5 || chromosome 22 open reading frame 5 (1)	0.17	0.28	-0.17	-0.65	-1.34e-08	-0.653	-0.64	-0.205	-0.56	-1.05	0.205
25830	SULT4A1 || sulfotransferase family 4A, member 1 (1)	0.12	-0.13	-0.12	0.17	0.445	0.567	0.19	0.102	-0.14	-0.525	-0.102
25831	HECTD1 || HECT domain containing 1 (1)	0.245	-0.005	0.005	-0.025	0.623	-1.49e-10	0.213	0.035	0.183	0.143	0.705
25832	DJ328E19.C1.1 || hypothetical protein DJ328E19.C1.1 (1)	6.71e-09	-0.35	0.53	0	-1	0.937	-0.39	0.647	8.94e-10	0.61	-0.683
25839	COG4 || component of oligomeric golgi complex 4 (1)	0.02	4.84e-09	-0.19	0	-0.09	-0.253	0.29	-0.393	-0.22	1.49e-08	0.142
25841	ABTB2 || ankyrin repeat and BTB (POZ) domain containing 2 (1)	0.69	0.29	-0.29	-0.51	0.1	-0.283	1.19	-0.1	0.06	-3.83	0.1
25843	PREI3 || preimplantation protein 3 (3)	-0.645	-0.378	0.378	0.553	0.0614	0.513	-0.102	0.714	0.171	0.256	-0.234
25844	C6orf109 || chromosome 6 open reading frame 109 (2)	-0.045	0.125	0.045	-0.395	-0.512	-1.31e-08	0.663	0.12	-0.087	-0.397	-0.12
25845	DKFZP564I1171 || DKFZP564I1171 protein (2)	0.02	0.115	-0.02	-0.35	-1.19e-09	-0.528	-0.055	-0.392	0.085	-0.315	-0.455
25847	ANAPC13 || anaphase promoting complex subunit 13 (1)	-0.1	-0.4	0.1	0.24	-0.337	1.55e-08	0.033	-2.03e-08	-0.037	0.273	-0.32
2585	GALK2 || galactokinase 2 (2)	-0.4	0.155	-0.025	0.025	0.438	0.82	-0.112	0.779	-0.00165	0.243	-0.591
25852	ARMC8 || armadillo repeat containing 8 (12)	-0.55	-0.205	0.205	0.265	-0.21	0.287	-0.27	0.05	-0.21	5.54e-08	-0.222
25855	BRMS1 || breast cancer metastasis suppressor 1 (2)	0.045	-0.045	-1.05	0.205	-0.437	2.5e-08	0.558	0.245	0.013	0.293	-0.245
25861	DFNB31 || deafness, autosomal recessive 31 (1)	0.245	0.395	-0.245	-0.965	0.33	-0.603	0.74	0.15	-2.15e-08	-1.89	-0.46
25864	ABHD14A || abhydrolase domain containing 14A (1)	0.32	0.22	-0.22	-0.72	-0.55	-0.643	0.55	-0.163	0.04	2.2e-08	-0.043
25865	PRKD2 || protein kinase D2 (1)	0.27	0.33	-0.27	-0.54	-0.06	-0.173	0.98	0.335	0.18	-6.26e-09	-0.335
25869	DKFZP564M1416 || DKFZP564M1416 protein (1)	-0.445	-0.145	0.145	0.685	0.02	0.037	-0.48	0.475	-0.02	-1.37e-08	-0.475
25870	SUMF2 || sulfatase modifying factor 2 (2)	-0.593	0.102	0.517	-0.102	-0.443	0.184	1.17	0.542	0.152	-0.703	-0.088
25871	C3orf17 || chromosome 3 open reading frame 17 (2)	-0.168	-0.472	0.198	0.168	0.513	-2.74e-08	-0.132	-0.12	-0.484	0.433	0.12
25873	RPL36 || ribosomal protein L36 (3)	0.22	0.33	-0.22	-0.94	-0.64	0.087	0.207	0.196	-0.073	1.73e-08	-0.196
25874	BRP44 || brain protein 44 (2)	0.0225	0.0875	-0.0225	-0.512	0.27	0.437	-0.115	0.512	-0.105	0.18	-0.268
25875	LETMD1 || LETM1 domain containing 1 (1)	0.06	-0.05	0.05	-0.52	-0.15	0.017	0	0.28	-0.24	0.31	-0.28
25879	WDSOF1 || WD repeats and SOF1 domain containing (1)	0.135	0.275	-0.135	-0.355	0.19	0.577	-0.79	0.0275	-2.15e-08	0.47	-0.0275
25880	C16orf51 || chromosome 16 open reading frame 51 (1)	0.255	0.105	-0.105	-0.945	0.33	0.727	-1.19e-08	-0.503	0.16	-0.61	0.067
25885	POLR1A || polymerase (RNA) I polypeptide A, 194kDa (1)	0.4	0.04	-0.04	-0.44	0.6	-0.163	1.04	0.412	-5.96e-09	-0.13	0.022
25886	WDR51A || WD repeat domain 51A (2)	0.27	0.35	-0.38	-0.27	-0.372	5.96e-09	0.363	-0.148	-0.142	0.008	-0.468
25888	ZNF473 || zinc finger protein 473 (2)	-0.155	-0.165	0.155	0.525	-1.82e-08	0.107	-0.3	-1.22	-0.19	0.36	0.125
25898	RCHY1 || ring finger and CHY zinc finger domain containing 1 (3)	-0.0115	-0.172	0.0585	0.0115	4.86e-08	0.367	-0.29	0.4	0.01	0.39	-0.4
2590	GALNT2 || UDP-N-acetyl-alpha-D-galactosamine:polypeptide N-acetylgalactosaminyltransferase 2 (GalNAc-T2) (1)	0.45	0.05	-0.05	-0.21	0.13	-0.213	-0.07	0.147	3.58e-09	-0.01	0.147
25900	HOM-TES-103 || HOM-TES-103 tumor antigen-like (2)	0.0625	0.107	-0.0625	-0.682	-0.2	-0.358	0.945	-0.205	-0.11	-7.75e-09	0.205
25902	MTHFD1L || methylenetetrahydrofolate dehydrogenase (NADP+ dependent) 1-like (1)	0.02	-0.02	-0.29	0.6	0.283	-4.17e-09	0.283	-0.065	-0.267	-0.137	-0.065
25904	CNOT10 || CCR4-NOT transcription complex, subunit 10 (1)	-0.355	-0.245	0.245	0.445	-0.04	0.137	-0.27	0.407	0.23	1.73e-08	-0.063
25906	DKFZP564M082 || DKFZP564M082 protein (2)	0.372	0.383	-0.762	-0.372	-0.23	0.247	-0.225	0.133	0.615	0.165	-0.133
25907	RIS1 || Ras-induced senescence 1 (1)	0.015	0.355	-0.295	-0.015	-0.085	-0.278	0.445	0.185	-0.035	-2.58	-0.445
25909	ELYS || ELYS transcription factor-like protein TMBS62 (1)	0.4	-0.4	-0.8	0.63	1.1	0.463	-0.787	-0.06	-0.344	-1.6	0.375
25911	RP11-529I10.4 || deleted in a mouse model of primary ciliary dyskinesia (2)	0.443	0.282	-0.282	-0.302	-0.25	0.167	0.325	-0.3	3.73e-11	-0.095	0.115
25912	C1orf43 || chromosome 1 open reading frame 43 (2)	-0.23	0.1	0.1	-0.1	-0.43	0.727	3.58e-08	0.51	-0.22	0.46	0.35
25917	THUMPD3 || THUMP domain containing 3 (1)	-0.02	-0.06	0.02	0.69	0.22	0.307	-0.47	0.12	0.3	-1.37e-08	-0.12
2592	GALT || galactose-1-phosphate uridylyltransferase (2)	0.195	-0.08	0.08	-0.265	0.063	-0.02	6.68e-09	0.0115	-0.324	0.268	-0.0115
25921	ZDHHC5 || zinc finger, DHHC domain containing 5 (1)	0.285	0.255	-0.255	-1.49	0.32	-0.013	-0.62	0.477	0.42	0.23	0.197
25923	DKFZP564J0863 || DKFZP564J0863 protein (3)	-0.0275	-0.578	0.163	0.0275	-0.418	-0.153	-0.298	-0.03	0.265	0.595	-0.1
259230	TMEM23 || transmembrane protein 23 (1)	-0.245	0.115	-0.115	0.505	0.203	8.34e-09	-0.787	0.595	0.223	0.053	-0.595
25925	ZNF521 || zinc finger protein 521 (1)	-0.02	0.02	-0.23	0.65	0.103	-3.28e-09	-0.137	-0.015	0.113	-0.197	-0.675
25926	DKFZP586L0724 || DKFZP586L0724 protein (3)	-0.307	-0.01	0.01	0.483	1.21e-08	0.754	-0.156	0.075	0.26	1.03	-0.075
25927	C2orf32 || chromosome 2 open reading frame 32 (1)	0.005	0.205	-0.005	-0.505	-0.29	-0.333	-0.5	0.04	0.75	2.2e-08	-0.04
2593	GAMT || guanidinoacetate N-methyltransferase (3)	0.24	-0.08	0.08	-0.63	-0.548	-0.511	1.23	0.338	-0.153	-0.178	0.618
25936	C1orf48 || chromosome 1 open reading frame 48 (2)	-1.16	-0.228	0.407	0.228	0.14	0.697	-4.17e-09	0.595	0.31	0.49	-0.28
25938	C14orf125 || chromosome 14 open reading frame 125 (2)	-0.675	-0.095	0.095	0.62	-8.94e-10	0.032	-0.3	0.355	0.075	-0.48	-0.355
25940	DKFZP564F0522 || DKFZP564F0522 protein (1)	-0.22	-0.25	0.22	0.62	0.34	0.297	-1.29	0.535	-0.16	0.06	-0.245
25941	C18orf10 || chromosome 18 open reading frame 10 (2)	-0.0125	0.0125	0.407	-0.207	-1.05	0.257	4.05e-08	0.275	-0.42	-0.165	-0.465
25945	PVRL3 || poliovirus receptor-related 3 (1)	-0.19	-0.31	0.19	0.71	0.0384	0.485	-0.367	0.502	0.308	-0.342	-0.502
25948	KBTBD2 || kelch repeat and BTB (POZ) domain containing 2 (1)	-0.005	-0.055	0.455	0.005	0.46	0.257	-0.34	0.115	1.04e-09	-0.09	-0.115
25949	CBPIN || CCNDBP1 interactor (2)	0.115	0.085	-0.395	-0.085	0.18	0.392	-1.82	0.432	0.18	-2.09e-08	-0.432
25950	RWDD3 || RWD domain containing 3 (1)	-0.1	0.1	0.28	-0.44	0.479	0.556	-0.411	0.695	0.319	0.309	-0.365
25953	MR-1 || myofibrillogenesis regulator 1 (2)	0.0725	-0.0675	0.0675	-0.458	-0.785	-1.02	-0.185	-0.385	7.15e-09	0.805	0.385
25956	SEC31L2 || SEC31-like 2 (S. cerevisiae) (2)	-0.02	0.02	-0.19	2.45	0.125	0.252	0.825	-0.065	0.125	-0.665	0.065
25961	NUDT13 || nudix (nucleoside diphosphate linked moiety X)-type motif 13 (1)	0.03	-0.03	0.04	-0.06	-0.33	-0.033	-0.03	0.17	-1.69	0.27	-0.17
25962	DKFZP434I116 || DKFZP434I116 protein (10)	-0.44	-0.3	0.3	0.614	0.409	0.872	-0.134	0.587	0.209	-0.302	-0.102
25963	DKFZP564G2022 || DKFZP564G2022 protein (2)	-0.578	-0.522	0.522	0.693	0.39	0.527	-0.67	0.3	0.17	0.15	-0.3
2597	GAPDH || glyceraldehyde-3-phosphate dehydrogenase (7)	-0.0145	0.0145	0.357	-0.358	-1.4	0.01	0.093	-0.1	-0.442	0.093	0.1
25970	SH2B || SH2-B homolog (2)	0.122	0.333	-0.122	-0.938	0.12	-0.228	1	-0.22	0.02	-1.26	0.22
25973	DKFZp727A071 || similar to tRNA synthetase class II (1)	0.25	0.03	-0.13	-0.03	4.38e-08	-0.273	0.3	-0.35	0.09	-0.1	-0.25
25974	DKFZp564I122 || DKFZp564I122 protein (1)	0.215	-0.185	0.045	-0.045	-0.547	-3.35e-10	-0.137	0.145	0.253	0.283	-0.145
25977	NECAP1 || adaptin-ear-binding coat-associated protein 1 (3)	-0.39	-0.726	0.39	0.447	0.048	1.19e-09	-0.122	-0.165	0.598	0.168	0.165
25978	CHMP2B || chromatin modifying protein 2B (1)	-0.09	-0.15	0.09	0.37	0.77	0.507	-0.21	0.175	-0.17	-0.11	-0.175
25979	DKFZp566O084 || DKFZP566O084 protein (1)	0.09	-0.09	0.22	-0.29	-0.49	0.127	-0.15	0.125	2.38e-09	0.03	-0.125
25980	C20orf4 || chromosome 20 open reading frame 4 (1)	-0.06	3.88e-08	0.22	0	-0.86	-0.903	5.96e-08	-0.57	-0.34	-0.22	-0.06
25987	TSK || tsukushi (1)	0.13	0.28	-0.13	-0.72	-0.79	-0.503	3.1e-08	-0.49	-0.35	-0.66	-0.35
25989	ULK3 || unc-51-like kinase 3 (C. elegans) (1)	-0.24	0.18	0.28	-0.18	0.43	-0.213	1.14	-0.888	-1.07e-08	-0.03	0.102
25994	HIG1 || likely ortholog of mouse hypoxia induced gene 1 (1)	-0.145	0.145	0.265	-0.215	0.85	0.677	-1.86e-10	0.72	0.88	0.74	-0.05
26001	RNF167 || ring finger protein 167 (3)	0.095	0.315	-0.095	-0.755	-1.1	-0.096	0.21	-0.23	-4.53e-08	-0.065	0.23
26002	MOXD1 || monooxygenase, DBH-like 1 (1)	-0.19	-0.23	0.19	0.21	-5.22e-10	0.367	-0.07	0.022	1.07	0.6	0.392
26003	GORASP2 || golgi reassembly stacking protein 2, 55kDa (2)	-0.497	-0.718	0.497	0.618	-0.22	0.047	4.05e-08	0.337	-0.13	0.06	0.247
26007	DKFZP586B1621 || DKFZP586B1621 protein (1)	0.095	0.155	-0.095	-0.945	-0.492	-0.675	0.728	0.045	0.288	-1.23	-0.045
26009	ZZZ3 || zinc finger, ZZ domain containing 3 (1)	0.11	-0.22	-0.11	0.31	0.07	0.032	1.19e-08	0.026	-0.87	-0.05	-0.026
26010	DNAPTP6 || DNA polymerase-transactivated protein 6 (1)	0.04	0.08	-0.04	-0.12	0.38	0.317	-0.21	-0.075	0.08	-1.61e-08	-0.055
26012	NELF || nasal embryonic LHRH factor (2)	-0.06	0.325	0.06	-1.25	0.052	-0.531	0.889	-0.254	-1.86e-08	-0.218	0.254
26018	LRIG1 || leucine-rich repeats and immunoglobulin-like domains 1 (1)	0.145	-0.015	0.015	-0.145	-2.98e-10	-0.143	-0.28	0.39	0.01	-0.4	-0.39
26019	UPF2 || UPF2 regulator of nonsense transcripts homolog (yeast) (1)	0.055	-0.185	-0.055	0.155	0.258	-2.03e-08	1.13	-0.29	-0.072	-0.367	0.08
26022	DKFZP564K1964 || DKFZP564K1964 protein (2)	0.055	-0.055	0.095	-0.775	-0.492	-4.77e-09	0.863	0.2	0.003	-0.152	-0.16
260294	WBSCR20C || Williams Beuren syndrome chromosome region 20C (2)	0.0225	0.102	-0.0225	-0.263	-0.04	0.217	0.317	0.025	-0.22	1.2	-0.155
26033	ATRNL1 || attractin-like 1 (1)	-0.095	0.095	0.145	-0.175	0.443	-1.07e-08	0.243	0.882	-0.072	-0.087	0.222
26035	GLCE || glucuronyl C5-epimerase (1)	-1.24e-08	-0.16	0.43	0	-0.18	-0.333	-0.35	-0.035	0.14	1.79e-09	0.035
26037	SIPA1L1 || signal-induced proliferation-associated 1 like 1 (1)	0.175	-0.175	-0.235	0.385	0.22	-0.173	0.32	-0.145	-9.54e-09	-0.97	0.145
26039	SS18L1 || synovial sarcoma translocation gene on chromosome 18-like 1 (1)	-0.095	-0.375	0.215	0.095	0.345	-0.098	0.435	0.215	2.38e-09	-0.075	-0.215
26046	ZNF294 || zinc finger protein 294 (1)	-0.055	-0.315	0.055	0.305	0.102	0.0985	-0.298	1.07	-0.329	0.272	-0.49
26048	ZNF500 || zinc finger protein 500 (1)	0.155	0.305	-0.155	-0.185	-0.145	-0.448	0.685	0.182	2.62e-08	0.005	0.332
26049	KIAA0888 || KIAA0888 protein (1)	0.29	0.01	-0.03	-0.01	0.605	0.442	-0.37	1.26	-2.15e-08	0.695	-0.0175
26053	AUTS2 || autism susceptibility candidate 2 (1)	0.22	0.33	-0.67	-0.22	0.41	-0.013	-0.7	0.112	2.38e-09	-0.17	-0.288
26054	SENP6 || SUMO1/sentrin specific protease 6 (2)	-0.0925	-0.193	0.0925	0.752	0.848	1.79e-09	0.163	0.119	0.198	-0.732	-0.126
26056	RAB11FIP5 || RAB11 family interacting protein 5 (class I) (1)	-0.055	-0.195	0.055	0.125	-0.642	-0.905	-0.402	-1.12	-0.0416	0.0483	-0.063
26058	TNRC15 || trinucleotide repeat containing 15 (1)	0.34	0.13	-0.13	-0.28	0.433	2.09e-09	0.513	0.132	0.313	-0.037	0.042
26060	APPL || adaptor protein containing pH domain, PTB domain and leucine zipper motif 1 (2)	-0.13	0.43	-0.25	0.13	0.723	0.524	-0.718	0.573	0.843	-0.388	0.152
26061	HPCL2 || 2-hydroxyphytanoyl-CoA lyase (4)	-0.829	-0.481	0.722	0.481	2.66e-08	0.96	0.523	0.0685	-0.309	0.153	-0.0685
26064	RAI14 || retinoic acid induced 14 (1)	0.06	-0.32	-0.04	0.04	-0.25	1.55	-0.64	-0.298	0.64	0.47	0.902
26065	FAM61A || family with sequence similarity 61, member A (2)	-0.26	0.505	-0.11	0.11	0.628	0.569	-1.21	0.313	0.502	-0.475	0.397
26071	DKFZP564B147 || DKFZP564B147 protein (2)	0.25	0.13	-0.13	-0.635	-0.635	-0.223	0.16	1.79e-08	7.15e-09	-0.06	-0.02
26084	SGEF || Src homology 3 domain-containing guanine nucleotide exchange factor (1)	-0.25	-0.33	0.26	0.25	0.05	0.347	-0.32	-0.773	-1.19e-09	-0.64	-0.073
26090	C20orf22 || chromosome 20 open reading frame 22 (1)	-0.37	3.05e-09	0.03	0	0.06	0.017	-0.39	0.147	1.67e-08	0.14	-0.443
26092	LAP1B || lamina-associated polypeptide 1B (1)	-0.12	-0.24	0.12	0.22	-0.15	-0.283	0.1	0.375	0.54	0.48	-0.175
26097	C1orf77 || chromosome 1 open reading frame 77 (1)	-0.01	0.65	0.01	-3.35	0.104	0.431	-0.126	0.51	-0.176	-1.6	-0.2
26099	DKFZp566C0424 || putative MAPK activating protein PM20,PM21 (2)	-0.03	0.03	0.05	-0.235	-4.47e-09	-0.173	0.17	0.055	0.445	-0.125	-0.055
26100	WIPI-2 || WIPI49-like protein 2 (3)	-0.191	-0.0984	0.512	0.0984	-0.0617	0.279	0.623	-0.292	0.0163	-0.485	0.275
26115	DKFZP564D166 || putative ankyrin-repeat containing protein (1)	0.06	2.46e-09	-0.12	0	-6.86e-09	0.147	0.13	0.07	-0.69	0.32	-0.07
26118	WSB1 || WD repeat and SOCS box-containing 1 (2)	0.445	0.155	-1.43	-0.155	0.0984	-0.0946	-0.492	1.09	0.478	0.248	-1.51
26119	LDLRAP1 || low density lipoprotein receptor adaptor protein 1 (2)	-0.448	-0.128	0.128	0.482	5.66e-09	-0.583	0.23	-0.731	-0.46	-0.72	-0.345
26121	PRPF31 || PRP31 pre-mRNA processing factor 31 homolog (yeast) (1)	0.465	0.415	-0.415	-0.955	0.28	-0.203	-0.07	-0.545	0.04	2.68e-08	0.545
26122	EPC2 || enhancer of polycomb homolog 2 (Drosophila) (1)	-0.095	-0.145	0.095	0.775	0.51	0.577	-0.36	0.405	-0.19	0.07	-0.175
26123	C10orf61 || chromosome 10 open reading frame 61 (1)	-0.005	0.055	0.005	-0.355	-0.21	-0.383	-0.14	-0.318	1.6	1.58	1.18
26127	FGFR1OP2 || FGFR1 oncogene partner 2 (1)	-0.005	0.165	-0.305	0.005	0.72	0.627	-0.74	0.0925	0.045	-1.37e-08	-0.0925
26130	GAPVD1 || GTPase activating protein and VPS9 domains 1 (1)	0.135	-0.055	-0.395	0.055	0.278	0.644	0.328	0.57	-0.0175	0.0175	-0.35
26133	TRPC4AP || transient receptor potential cation channel, subfamily C, member 4 associated protein (1)	0.17	-0.18	-1.28e-08	-1.57e-08	0.03	-0.183	0.49	-0.39	0.18	-1.85e-08	0.39
26135	PAI-RBP1 || PAI-1 mRNA binding protein (1)	-0.1	-1.04e-07	0.52	0	0.12	0.687	-0.33	0.745	0.155	-4.17e-09	-0.155
26145	IRF2BP1 || interferon regulatory factor 2 binding protein 1 (1)	0.225	0.175	-0.175	-0.625	-0.0916	-0.335	1.39	0.03	0.318	0.148	-0.03
26146	TRAF3IP1 || TNF receptor-associated factor 3 interacting protein 1 (1)	0.055	-0.335	-0.055	0.405	0.48	0.137	-1.43e-08	0.605	0.81	0.13	0.005
26147	PHF19 || PHD finger protein 19 (1)	0.185	0.115	-0.115	-0.505	-0.02	-0.713	0.55	-0.593	-0.31	-1.02	-0.133
26149	ZNF658 || zinc finger protein 658 (1)	-0.21	-0.05	0.05	0.13	0.9	0.197	-2.38e-09	0.065	0.57	-0.22	0.285
26151	NAT9 || N-acetyltransferase 9 (1)	-1.95e-08	0.04	-0.18	0	-0.07	-0.393	0.57	-0.138	0.04	4.17e-09	0.362
26152	ZNF337 || zinc finger protein 337 (2)	-0.27	-0.16	0.16	0.75	-8.64e-09	0.517	-0.205	-0.055	-0.075	-1.85	0.055
26153	KIF26A || kinesin family member 26A (1)	5.51e-09	0.06	-0.23	0	0.76	-0.423	0.18	0.0045	1.19e-08	-0.38	0.539
26155	DKFZP564C186 || DKFZP564C186 protein (2)	0.463	0.532	-0.463	-0.772	2.47e-08	-0.273	0.93	0.06	-0.13	-0.47	-0.06
26160	SLB || selective LIM binding factor, rat homolog (2)	0.19	-0.55	-0.19	0.49	0.635	0.122	0.475	-0.125	-0.005	-0.535	0.375
26164	GTPBP5 || GTP binding protein 5 (putative) (2)	-0.465	0.095	0.865	-0.095	-0.205	-0.498	0.63	-0.8	2.38e-09	0.425	-0.161
26168	SENP3 || SUMO1/sentrin/SMT3 specific protease 3 (1)	0.32	0.24	-0.24	-0.34	0.15	-0.263	0.55	-0.073	1.29	0.84	0.987
26175	C14orf109 || chromosome 14 open reading frame 109 (1)	0.11	-0.1	0.1	-0.18	-0.35	0.007	0.24	-0.005	-0.03	-0.19	-0.375
2618	GART || phosphoribosylglycinamide formyltransferase, phosphoribosylglycinamide synthetase, phosphoribosylaminoimidazole synthetase (13)	-0.649	-0.369	0.369	0.477	0.197	0.821	-0.109	0.227	-1.23e-08	-0.173	0.043
26190	FBXW2 || F-box and WD-40 domain protein 2 (1)	-0.2	0.05	0.83	-0.05	0.35	0.827	-0.22	-0.583	-0.08	-0.31	-0.013
26224	FBXL3 || F-box and leucine-rich repeat protein 3 (1)	1.34e-09	-0.31	0.13	0	-2.53e-08	0.567	-0.35	0.49	-0.27	0.87	-0.49
26225	ARL5 || ADP-ribosylation factor-like 5 (2)	-0.455	-0.18	0.18	0.215	2.24e-10	0.472	-0.28	4.77e-09	-0.15	-1.04	-0.44
26229	B3GAT3 || beta-1,3-glucuronyltransferase 3 (glucuronosyltransferase I) (2)	0.13	-4.1e-09	-0.315	0	-0.447	-0.665	1.02	-0.466	0.0433	0.108	0.499
26233	FBXL6 || F-box and leucine-rich repeat protein 6 (2)	-0.16	0.17	0.16	-0.79	-0.175	-0.143	1.42	-0.005	-0.065	-4.17e-09	0.005
26235	FBXL4 || F-box and leucine-rich repeat protein 4 (1)	0.02	0.08	-0.05	-0.02	0.39	0.017	-0.62	0.18	0.24	2.2e-08	-0.18
2624	GATA2 || GATA binding protein 2 (1)	0.21	0.16	-0.16	-0.44	0.16	-0.863	0.87	-0.415	-1.79e-09	-0.2	0.225
26255	PTTG3 || pituitary tumor-transforming 3 (2)	0.11	1.86e-09	-0.255	0	-0.49	-0.028	-0.465	-0.583	-0.025	0.21	-0.198
26256	CABYR || calcium-binding tyrosine-(Y)-phosphorylation regulated (fibrousheathin 2) (2)	-0.025	0.025	0.125	-0.145	0.11	0.127	-0.655	-0.925	-0.125	-0.36	-0.05
26258	PLDN || pallidin homolog (mouse) (2)	0.203	-0.343	-0.203	0.583	8.94e-10	-0.008	-0.435	0.323	0.315	0.115	-0.323
2626	GATA4 || GATA binding protein 4 (1)	0.4	0.1	-0.1	-0.7	-0.137	-2.09e-09	-0.247	0.005	-0.117	-0.367	-0.555
26262	TSPAN17 || tetraspanin 17 (1)	-0.08	0.15	1.49e-09	0	-0.195	-0.438	0.3	-0.122	1.19e-08	-0.235	0.122
26263	FBXO22 || F-box protein 22 (4)	-0.16	-0.793	0.16	0.367	-0.01	-0.17	0.34	0.53	0.367	0.167	0.09
26268	FBXO9 || F-box protein 9 (4)	0.04	-0.04	-0.88	0.39	-4.68e-08	0.577	0.4	-0.095	0.834	-0.67	0.095
2627	GATA6 || GATA binding protein 6 (1)	0.39	0.34	-0.34	-0.5	-0.16	-0.443	4.05e-08	0.2	-0.02	0.05	-0.2
26272	FBXO4 || F-box protein 4 (2)	-0.168	-0.168	0.228	0.168	2.24e-08	0.172	-0.14	0.41	0.22	-0.15	-0.24
26273	FBXO3 || F-box protein 3 (4)	0.11	-0.11	-0.22	0.958	0.45	0.824	-0.545	0.383	-0.081	0.162	-0.151
26275	HIBCH || 3-hydroxyisobutyryl-Coenzyme A hydrolase (2)	-0.335	-0.175	0.72	0.175	0.685	0.769	-0.15	0.573	0.46	0.555	-0.228
26278	SACS || spastic ataxia of Charlevoix-Saguenay (sacsin) (1)	-0.125	-0.035	0.035	0.525	0.755	0.312	0.005	0.4	-0.285	-0.575	0.18
26284	ERAL1 || Era G-protein-like 1 (E. coli) (2)	-0.085	0.085	0.305	-0.225	-1.09	0.067	-2.15e-08	-0.138	0.06	-0.08	-0.528
26286	ARFGAP3 || ADP-ribosylation factor GTPase activating protein 3 (1)	-0.24	-0.27	0.24	0.45	0.98	0.817	-0.7	0.46	2.86e-08	0.65	0.68
2629	GBA || glucosidase, beta; acid (includes glucosylceramidase) (1)	-0.01	0.09	0.01	-0.75	-0.73	-0.273	0.2	-0.24	-0.54	-1.22	0.06
26292	MYCBP || c-myc binding protein (2)	-0.0775	0.0775	0.107	-0.432	-3.87e-09	-0.063	-0.415	0.258	0.34	0.6	-0.258
26297	DELGEF || deafness locus associated putative guanine nucleotide exchange factor (2)	0.0725	0.212	-0.133	-0.0725	0.145	0.192	-0.425	0.0035	-0.105	-0.695	-0.356
2631	GBAS || glioblastoma amplified sequence (1)	-0.165	-0.295	0.235	0.165	0.208	-0.0146	-0.172	-0.498	0.0284	0.0483	0.162
2632	GBE1 || glucan (1,4-alpha-), branching enzyme 1 (glycogen branching enzyme, Andersen disease, glycogen storage disease type IV) (1)	1.86e-08	-0.28	0.88	0	9.24e-09	0.257	-0.63	0.05	0.05	1.79e-09	-0.03
26353	HSPB8 || heat shock 22kDa protein 8 (1)	-0.06	-0.09	0.06	0.37	0.39	0.557	-4.77e-09	0.557	-0.15	-1.37e-08	-0.573
2639	GCDH || glutaryl-Coenzyme A dehydrogenase (3)	0.045	0.46	-0.045	-0.725	-0.19	-7.15e-10	0.19	-0.318	0.193	-0.46	-0.00835
2644	GCHFR || GTP cyclohydrolase I feedback regulator (2)	0.448	0.328	-0.328	-0.988	-0.84	-0.498	0.37	-0.48	-0.42	-0.52	-0.355
26468	LHX6 || LIM homeobox 6 (1)	0.045	-0.085	-0.045	0.375	0.103	3.58e-09	-0.467	0.005	-0.502	0.183	-0.06
26469	PTPN18 || protein tyrosine phosphatase, non-receptor type 18 (brain-derived) (2)	-0.625	0.625	-1.04	1.06	0.145	-0.508	0.235	-0.168	0.075	-0.735	-0.268
2647	BLOC1S1 || biogenesis of lysosome-related organelles complex-1, subunit 1 (2)	0.705	0.395	-0.395	-0.595	-0.397	0.0254	-0.207	-0.083	0.0634	0.298	0.217
26470	SEZ6L2 || seizure related 6 homolog (mouse)-like 2 (4)	0.1	0.14	-0.1	-0.217	-0.278	-0.613	0.567	-1.11	-0.303	-0.138	0.252
26472	PPP1R14B || protein phosphatase 1, regulatory (inhibitor) subunit 14B (2)	0.355	0.69	-0.355	-1.06	-0.000825	0.0162	0.949	0.294	-0.00583	-0.0108	-0.0205
26502	NARF || nuclear prelamin A recognition factor (2)	-0.18	-0.08	0.08	0.345	-0.24	-0.023	2.98e-09	-0.892	-0.1	-0.03	-0.107
26503	SLC17A5 || solute carrier family 17 (anion/sugar transporter), member 5 (1)	-0.02	-0.27	0.02	0.46	-0.3	-0.033	-0.02	0.235	9.54e-09	0.07	-0.235
26505	CNNM3 || cyclin M3 (2)	0.06	-0.18	0.35	-0.06	-0.03	-0.933	0.235	0.117	-0.31	-4.77e-09	-0.117
26511	CHIC2 || cysteine-rich hydrophobic domain 2 (1)	-0.47	-0.74	0.47	0.5	-0.315	0.092	0.785	-0.035	-0.125	0.035	0.035
26515	FXC1 || fracture callus 1 homolog (rat) (2)	0.075	-0.005	-0.135	0.005	-0.67	0.212	0.325	-0.125	-1.49e-10	0.395	0.125
26519	TIMM10 || translocase of inner mitochondrial membrane 10 homolog (yeast) (1)	0.56	0.24	-0.24	-0.89	-0.67	-0.273	0.2	-0.243	0.04	0.13	0.427
26520	TIMM9 || translocase of inner mitochondrial membrane 9 homolog (yeast) (2)	-0.12	-0.245	0.125	0.12	0.155	0.307	-1.17	0.698	-0.345	-2.8e-08	-0.307
26523	EIF2C1 || eukaryotic translation initiation factor 2C, 1 (2)	-0.195	-0.285	0.195	0.23	0.43	-0.378	-0.015	-0.266	0.39	0.08	0.0245
26524	LATS2 || LATS, large tumor suppressor, homolog 2 (Drosophila) (2)	-0.347	0.347	-0.698	0.863	-0.037	6.56e-09	0.708	0.5	-0.062	-0.477	-0.185
2657	GDF1 || growth differentiation factor 1 (2)	0.135	0.185	-0.135	-0.625	4.47e-09	-0.643	0.26	-0.302	-0.35	-0.34	-0.0125
26574	AATF || apoptosis antagonizing transcription factor (1)	-0.015	-0.095	0.015	1.31	0.13	0.157	-0.46	-0.21	-0.55	2.98e-09	-0.2
26577	PCOLCE2 || procollagen C-endopeptidase enhancer 2 (2)	-0.48	-0.49	0.48	0.51	-0.31	0.522	0.09	0.242	-3.58e-09	-0.79	-0.242
26578	OSTF1 || osteoclast stimulating factor 1 (1)	-0.025	-0.225	0.025	0.345	0.043	3.28e-09	-0.317	0.065	1.23	0.843	1.44
26580	BSCL2 || Bernardinelli-Seip congenital lipodystrophy 2 (seipin) (1)	0.17	0.28	-0.17	-0.5	-0.367	-4.65e-08	0.393	-0.223	1.26	1.16	0.997
26608	TBL2 || transducin (beta)-like 2 (2)	-0.395	0.135	0.25	-0.135	-2.77e-08	0.187	0.633	-0.128	0.08	0.52	0.255
2665	GDI2 || GDP dissociation inhibitor 2 (4)	-0.821	-0.309	0.409	0.309	-0.123	0.749	-0.858	0.409	5.24e-09	0.202	-0.409
266655	FLJ35348 || FLJ35348 (3)	-0.117	-0.128	0.117	0.458	-0.214	0.46	7.87e-09	-0.13	-0.137	1.44	0.13
267	AMFR || autocrine motility factor receptor (1)	-0.185	-0.285	0.515	0.185	0.17	-0.163	0.325	-0.175	0.56	0.4	0.175
267002	PGBD2 || piggyBac transposable element derived 2 (1)	0.3	0.27	-0.27	-0.38	-1.34e-08	0.397	-0.93	0.122	-0.57	0.24	-0.668
2673	GFPT1 || glutamine-fructose-6-phosphate transaminase 1 (1)	-0.555	-0.295	0.295	0.935	3.67e-08	0.757	-0.72	0.077	-0.03	2.92e-08	-0.738
26747	NUFIP1 || nuclear fragile X mental retardation protein interacting protein 1 (2)	0.3	0.09	-0.68	-0.09	-0.182	-0.495	-0.437	-0.263	0.398	-0.0216	-1.07
26750	RPS6KC1 || ribosomal protein S6 kinase, 52kDa, polypeptide 1 (2)	-0.258	-0.302	0.258	0.792	0.33	0.132	0.515	0.144	0.24	-0.4	0.565
26778	RNU70 || RNA, U70 small nucleolar (1)	0.665	0.115	-0.115	-0.735	-0.74	-0.063	1.11	0.095	0.37	0.03	-0.095
26784	RNU64 || RNA, U64 small nucleolar (1)	0.005	-0.005	0.445	-0.575	-0.739	0.0285	1.21	-0.055	-0.238	-0.0285	0.055
26788	RNU60 || RNA, U60 small nuclear (1)	0.045	-0.045	-1.94	0.205	8.94e-10	0.897	0.34	0.46	0.91	0.83	0.03
26797	RNU52 || RNA, U52 small nuclear (1)	0.075	0.205	-0.075	-0.255	-0.512	0.195	0.498	-0.11	0.318	0.278	0.25
26826	RNU6B || RNA, U6B small nuclear (1)	-0.305	-0.555	0.655	0.305	0.01	0.237	-0.42	-0.153	2.38e-09	0.54	0.377
2683	B4GALT1 || UDP-Gal:betaGlcNAc beta 1,4- galactosyltransferase, polypeptide 1 (1)	-0.1	0.1	0.13	-0.24	6.86e-09	-0.333	-0.54	-0.238	0.06	0.08	0.142
2686	GGTL3 || gamma-glutamyltransferase-like 3 (3)	-0.04	-0.05	0.04	1.21	-0.302	-0.885	1.26	0.23	0.388	-0.502	-0.23
26872	STEAP1 || six transmembrane epithelial antigen of the prostate 1 (1)	-0.38	0.44	0.38	-0.72	-0.183	0.0435	-0.123	0.83	0.366	0.0665	-0.34
2688	GH1 || growth hormone 1 (1)	0.29	-0.04	0.04	-0.13	-0.34	-0.093	-1.26	-0.295	-0.23	0.27	-0.125
26958	COPG2 || coatomer protein complex, subunit gamma 2 (1)	-0.025	-0.215	0.025	0.065	0.4	0.157	-5.96e-10	0.172	0.5	0.35	0.092
26960	NBEA || neurobeachin (1)	0.16	-0.37	2.98e-09	0	0.206	0.123	0.416	0.9	-0.344	-0.123	0.57
2697	GJA1 || gap junction protein, alpha 1, 43kDa (connexin 43) (2)	0.0975	-0.107	-0.0975	0.263	-0.585	-0.243	-1.05	-0.795	1.32	1.67	0.795
26973	CHORDC1 || cysteine and histidine-rich domain (CHORD)-containing, zinc binding protein 1 (3)	-0.0558	0.00085	0.441	-0.00085	0.653	0.75	-1.52	0.255	-0.21	0.246	-0.255
26979	PABPCP2 || poly(A) binding protein, cytoplasmic, pseudogene 2 (1)	-0.57	-0.27	0.27	1.71	0.0015	-0.0015	-1.08	0.527	0.311	-0.159	-0.623
26984	SEC22L2 || SEC22 vesicle trafficking protein-like 2 (S. cerevisiae) (3)	-0.141	-0.175	0.722	0.141	-1.39e-08	0.438	0.053	0.137	-0.177	-0.19	-0.205
26985	AP3M1 || adaptor-related protein complex 3, mu 1 subunit (2)	0.055	-0.255	0.165	-0.055	0.035	0.132	-0.175	0.195	-0.08	-2.8e-08	-0.195
26993	AKAP8L || A kinase (PRKA) anchor protein 8-like (1)	0.68	0.5	-0.5	-1.09	0.2	0.417	0.82	0.115	4.05e-08	-0.02	-0.205
26994	RNF11 || ring finger protein 11 (2)	-0.125	-0.45	0.125	0.145	3.9e-08	0.227	-0.19	0.195	-0.25	0.02	-0.5
26995	TRUB2 || TruB pseudouridine (psi) synthase homolog 2 (E. coli) (3)	-0.18	1.33	0.18	-0.22	0.163	5.96e-09	-0.217	0.338	0.183	0.213	-0.359
26999	CYFIP2 || cytoplasmic FMR1 interacting protein 2 (1)	0.215	-0.215	-0.235	0.635	-6.26e-09	-0.063	-4.77e-09	-0.12	0.27	0.28	8.64e-09
27000	ZRF1 || zuotin related factor 1 (2)	-0.07	0.17	-0.33	0.07	0.79	0.677	-0.99	0.255	0.1	-0.33	-0.255
27005	USP21 || ubiquitin specific protease 21 (1)	0.27	0.24	-0.24	-0.31	-0.4	-0.583	0.37	-4.41e-08	0.05	-2.09e-08	0.18
27013	C2orf24 || chromosome 2 open reading frame 24 (1)	0.11	0.19	-0.11	-0.23	-0.32	-0.273	0.555	-0.21	-0.015	1.49e-08	-0.385
27020	SDFR1 || stromal cell derived factor receptor 1 (2)	-1.04	-0.0975	0.0975	0.203	0.07	0.337	-0.355	0.172	9.54e-09	0.79	0.622
27034	ACAD8 || acyl-Coenzyme A dehydrogenase family, member 8 (1)	0.05	-0.04	0.04	-0.4	-0.11	-0.203	0.565	-0.0895	-2.98e-09	-0.15	0.123
27043	PELP1 || proline-, glutamic acid-, leucine-rich protein 1 (1)	0.435	0.515	-0.435	-0.915	-0.18	-0.003	0.4	1.31e-08	-2.15e-08	-0.04	-0.12
27065	D4S234E || DNA segment on chromosome 4 (unique) 234 expressed sequence (1)	0.025	-0.025	-0.335	1.18	3.28e-09	-0.513	-1.31	-1.03	0.16	0.05	0.235
27068	PPA2 || inorganic pyrophosphatase 2 (3)	-0.414	-0.114	0.222	0.114	-0.285	0.797	-0.52	0.353	7.15e-09	0.42	-0.353
27072	VPS41 || vacuolar protein sorting 41 (yeast) (1)	-0.22	-0.3	0.24	0.22	0.28	0.247	-0.48	0.189	-0.88	5.36e-09	-0.189
27097	TAF5L || TAF5-like RNA polymerase II, p300/CBP-associated factor (PCAF)-associated factor, 65kDa (1)	0.015	0.105	-0.315	-0.015	0.26	-0.133	-0.24	-0.61	0.415	0.43	0.35
271	AMPD2 || adenosine monophosphate deaminase 2 (isoform L) (1)	0.14	-0.01	-1.28e-08	0	-0.07	-0.453	0.82	-0.314	-0.5	-0.03	0.314
2710	GK || glycerol kinase (4)	0.0391	-0.191	-0.0391	0.384	-3.28e-09	-0.0355	-0.17	0.127	0.158	0.7	-0.127
27106	ARRDC2 || arrestin domain containing 2 (1)	0.485	0.205	-0.205	-0.445	0.39	-0.293	0.56	0.17	0.08	-0.6	0.18
27107	ZBTB11 || zinc finger and BTB domain containing 11 (1)	-0.05	-0.11	0.05	0.63	0.45	-0.093	-0.57	0.215	-0.55	-0.09	-0.215
27109	ATP5S || ATP synthase, H+ transporting, mitochondrial F0 complex, subunit s (factor B) (1)	0.175	0.045	-0.045	-0.385	0.033	-3.35e-10	0.073	-0.333	0.283	0.073	0.597
27111	SDCBP2 || syndecan binding protein (syntenin) 2 (1)	0.095	0.315	-0.475	-0.095	-0.223	-0.271	1.12e-08	-0.272	-0.406	-0.493	-0.108
27131	SNX5 || sorting nexin 5 (3)	-0.306	-0.194	0.194	0.533	0.46	0.337	0.085	0.042	-0.535	0.24	-0.476
27143	KIAA1274 || KIAA1274 (1)	0.01	-0.01	-0.23	0.17	0.353	-2.27e-08	0.923	-0.063	0.583	-0.077	0.237
27153	KIAA1285 || KIAA1285 protein (1)	0.285	0.165	-0.165	-0.745	0.31	-0.333	1.2	-4.77e-09	-1.04e-09	-0.64	3.87e-09
27154	BRPF3 || bromodomain and PHD finger containing, 3 (1)	0.095	-0.405	-0.035	0.035	0.44	-0.033	-0.62	-0.01	-0.48	-0.1	-0.15
27161	EIF2C2 || eukaryotic translation initiation factor 2C, 2 (1)	0.005	-0.005	-0.105	0.335	-6.86e-09	-0.243	-0.11	-5.96e-10	0.72	0.34	0.05
27163	ASAHL || N-acylsphingosine amidohydrolase (acid ceramidase)-like (1)	-0.49	-0.19	0.19	0.41	-0.492	0.335	0.278	-0.228	0.0583	0.118	0.172
27165	GLS2 || glutaminase 2 (liver, mitochondrial) (1)	-0.06	-0.05	0.05	0.28	-0.21	-0.043	-1.79e-09	-0.26	0.04	1.01	0.671
27166	PX19 || px19-like protein (2)	0.25	0.215	-0.215	-0.68	-0.517	0	0.283	0.117	0.398	0.518	0.607
2717	GLA || galactosidase, alpha (3)	-0.146	-0.0535	0.676	0.0535	-0.00165	0.24	-0.0966	0.0835	0.0403	0.238	-1.01
27173	SLC39A1 || solute carrier family 39 (zinc transporter), member 1 (1)	0.01	0.35	-0.01	-0.68	0.3	-0.063	-0.28	-0.01	0.43	-0.06	0.01
27175	TUBG2 || tubulin, gamma 2 (1)	0.06	-0.06	0.53	-0.21	-0.0117	-0.135	0.968	-0.07	0.428	-0.412	0.07
[truncated: 6,769 more rows]

## Sheet: Ago2_vs_Ago2miR1_IP_SAM_out
refseq	entrez_id	description	sam_score	sam_numerator	sam_denominator	fold_change	fdr	local_fdr	X3UTR_6mer_n2_7	X3UTR_6mer_n3_8	X3UTR_7merm8	X3UTR_7merA1	X3UTR_8mer	targetscan3.0	pictar5way	miranda	lim_expression	targetscan4.0_conserved	targetscan4.0_nonconserved	targetscan4.0_cum_cs	PITA_315	ORFn2_7	ORFn3_8	ORF_7merm8	ORF_7merA1	ORF_8mer	X5UTRn2_7	X5UTRn3_8	X5UTR_7merm8	X5UTR_7merA1	X5UTR_8mer	X3UTR_hs_s7merA1	X3UTR_con_s7merA1	X3UTR_hs_s7merm8	X3UTR_con_s7merm8	ORF_hs_s7merA1	ORF_con_s7merA1	ORF_hs_s7merm8	ORF_con_s7merm8
NM_198883	4580	MTX1 || metaxin 1 (3)	5.21989	2.86817	0.549469	6.94182	0	0	1	0	0	1	0	0	0	0	1	0	1	-0.0778	-17.4	0	1	0	0	0	0	0	0	0	0	1	0	0	0	0	0	0	0
NM_016021	51465	UBE2J1 || ubiquitin-conjugating enzyme E2, J1 (UBC6 homolog, yeast) (2)	4.81031	2.01046	0.417948	4.02275	0	0.01683	1	4	0	0	0	0	0	0	0	0	0	NA	-21.08	1	1	1	1	1	0	0	0	0	0	0	0	0	0	1	0	1	0
NM_001037494	8655	DNCL1 || dynein, cytoplasmic, light polype1ide 1 (2)	4.59892	2.05798	0.447492	4.24263	0	0.0343299	1	0	0	0	0	0	0	0	0	0	0	NA	-28.32	0	0	0	0	0	0	0	0	0	0	0	0	0	0	0	0	0	0
NM_003769	8683	SFRS9 || splicing factor, arginine/serine-rich 9 (2)	4.58829	1.68804	0.367902	3.23137	0	0.0352307	1	1	1	1	1	1	0	1	1	1	0	-0.4293	-18.67	0	0	0	0	0	0	0	0	0	0	1	1	1	1	0	0	0	0
NM_001013840	26123	C10orf61 || chromosome 10 open reading frame 61 (1)	4.5216	1.62221	0.358769	3.08558	0	0.0407849	0	0	0	0	0	0	0	0	0	0	0	NA	NA	1	1	1	1	1	0	0	0	0	0	0	0	0	0	1	0	1	0
NM_003564	8407	TAGLN2 || transgelin 2 (1)	4.39776	2.50958	0.57065	5.46362	0	0.0499891	4	2	2	1	0	1	0	0	1	1	1	-0.4169	-29.04	0	0	0	0	0	0	0	0	0	0	1	0	2	1	0	0	0	0
NA	304	ANXA2P2 || annexin A2 pseudogene 2 (1)	4.12818	1.93388	0.468457	3.81957	0	0.0523265	NA	NA	NA	NA	NA	0	0	0	0	0	0	NA	NA	NA	NA	NA	NA	NA	NA	NA	NA	NA	NA	NA	NA	NA	NA	NA	NA	NA	NA
NM_016262	51175	TUBE1 || tubulin, epsilon 1 (2)	4.0981	1.65387	0.403571	3.2293	0	0.0496474	0	0	0	0	0	0	0	0	0	0	0	NA	-18.85	2	2	2	1	1	NA	NA	NA	NA	NA	0	0	0	0	1	0	2	1
NM_080725	140809	SRXN1 || sulfiredoxin 1 homolog (S. cerevisiae) (1)	3.98121	1.81638	0.456237	3.48855	0	0.0299751	2	2	1	2	1	0	0	0	0	0	1	-0.3637	-22.69	0	0	0	0	0	0	0	0	0	0	2	0	1	0	0	0	0	0
NA	84278	HIATL2 || hippocampus abundant gene transcri1-like 2 (2)	3.94499	1.66842	0.42292	3.12797	0	0.0202719	NA	NA	NA	NA	NA	0	0	0	0	0	0	NA	NA	NA	NA	NA	NA	NA	NA	NA	NA	NA	NA	NA	NA	NA	NA	NA	NA	NA	NA
NM_198402	201562	1PLB || protein tyrosine phosphatase-like (proline instead of catalytic arginine), member b (1)	3.9428	2.06569	0.523914	4.20388	0	0.0196212	2	3	1	0	0	0	0	0	0	0	1	-0.1372	-18.99	2	2	1	1	1	0	0	0	0	0	0	0	0	0	1	1	1	1
NM_005034	5440	POLR2K || polymerase (RNA) II (DNA directed) polype1ide K, 7.0kDa (1)	3.91015	1.62621	0.415894	3.05777	0	0.00902049	1	1	1	1	1	0	0	0	1	0	1	-0.3587	NA	0	0	0	0	0	0	0	0	0	0	1	0	1	0	0	0	0	0
NA	440388	na || similar to coenzyme A diphosphatase (1)	3.88518	1.56592	0.403049	3.01535	0	0	NA	NA	NA	NA	NA	0	0	0	0	0	0	NA	NA	NA	NA	NA	NA	NA	NA	NA	NA	NA	NA	NA	NA	NA	NA	NA	NA	NA	NA
NA	303	ANXA2P1 || annexin A2 pseudogene 1 (1)	3.82697	1.73037	0.452152	3.28136	0	0	NA	NA	NA	NA	NA	0	0	0	0	0	0	NA	NA	NA	NA	NA	NA	NA	NA	NA	NA	NA	NA	NA	NA	NA	NA	NA	NA	NA	NA
NA	390498	na || similar to dynein, cytoplasmic, light pe1ide; 8kD LC; dynein LC8; protein inhibitor of neuronal nitric oxide synthase (1)	3.82677	2.14717	0.561091	4.48946	0	0	NA	NA	NA	NA	NA	0	0	0	0	0	0	NA	NA	NA	NA	NA	NA	NA	NA	NA	NA	NA	NA	NA	NA	NA	NA	NA	NA	NA	NA
NM_001099645	200916	RPL22L1 || ribosomal protein L22 like 1 (2)	3.7665	1.53446	0.407397	2.88147	0	0	0	0	0	0	0	0	0	0	0	0	0	NA	NA	0	0	0	0	0	0	0	0	0	0	0	0	0	0	0	0	0	0
NM_003329	7295	TXN || thioredoxin (2)	3.6915	2.0297	0.549831	4.0719	0	0	0	0	0	0	0	0	0	0	0	0	0	NA	NA	2	1	1	1	1	0	0	0	0	0	0	0	0	0	1	0	1	0
NM_014165	29078	C6orf66 || chromosome 6 open reading frame 66 (2)	3.69034	1.14667	0.310721	2.20603	0	0	0	0	0	0	0	0	0	0	0	0	0	NA	NA	1	0	0	0	0	0	0	0	0	0	0	0	0	0	0	0	0	0
NM_025205	80306	MED28 || mediator of RNA polymerase II transcri1ion, subunit 28 homolog (yeast) (1)	3.6067	1.27942	0.354733	2.44928	0	0	1	3	1	0	0	0	0	0	0	0	1	-0.1438	-18.1	0	0	0	0	0	NA	NA	NA	NA	NA	0	0	1	0	0	0	0	0
NM_002822	5756	1K9 || 1K9 protein tyrosine kinase 9 (2)	3.45563	1.81231	0.52445	3.39256	0	0	2	1	1	2	1	1	0	0	1	1	0	-0.5486	-20.1	1	1	1	0	0	NA	NA	NA	NA	NA	2	2	1	1	0	0	1	0
NM_001009923	29058	C20orf30 || chromosome 20 open reading frame 30 (2)	3.45094	1.58796	0.460153	2.95422	0	0	0	0	0	0	0	0	0	0	0	0	0	NA	-23.1	1	1	1	1	1	0	0	0	0	0	0	0	0	0	1	0	1	0
NM_022477	57446	NDRG3 || NDRG family member 3 (1)	3.44835	1.55902	0.452107	2.89014	0	0	2	1	1	1	1	0	0	0	0	0	1	-0.4273	-24.36	0	0	0	0	0	0	0	0	0	0	1	0	1	0	0	0	0	0
NM_002622	5201	PFDN1 || prefoldin 1 (3)	3.32373	1.22183	0.367609	2.33939	0	0	2	1	1	1	1	0	0	0	0	0	1	-0.3869	-21.54	0	0	0	0	0	NA	NA	NA	NA	NA	1	0	1	0	0	0	0	0
NM_004450	2079	ERH || enhancer of rudimentary homolog (Drosophila) (2)	3.27317	1.80006	0.549943	3.61043	0	0	0	1	0	0	0	0	0	0	0	0	0	NA	NA	0	0	0	0	0	0	0	0	0	0	0	0	0	0	0	0	0	0
NM_030938	81671	TMEM49 || transmembrane protein 49 (2)	3.26686	1.25294	0.38353	2.40487	0	0	1	0	0	1	0	0	0	0	0	0	1	-0.1933	-20.29	0	1	0	0	0	0	0	0	0	0	1	0	0	0	0	0	0	0
NM_001025107	103	ADAR || adenosine deaminase, RNA-specific (1)	3.21112	1.38033	0.429861	2.57411	0	0	4	2	1	0	0	1	0	0	1	1	0	-0.3629	-26.72	1	0	0	1	0	0	0	0	0	0	0	0	1	1	1	0	0	0
NM_005610	5928	RBBP4 || retinoblastoma binding protein 4 (2)	3.20233	1.46788	0.458377	2.97436	0	0	0	0	0	0	0	0	0	0	0	0	0	NA	NA	1	0	0	0	0	0	0	0	0	0	0	0	0	0	0	0	0	0
NM_006893	1939	LGTN || ligatin (1)	3.1649	1.11617	0.352671	2.15975	0	0	0	0	0	0	0	0	0	0	0	0	0	NA	NA	0	0	0	0	0	1	1	1	0	0	0	0	0	0	0	0	0	0
NM_024056	79022	MGC5576 || hypothetical protein MGC5576 (2)	3.15488	1.48829	0.471742	2.72369	0	0	0	0	0	0	0	0	0	0	0	0	0	NA	NA	2	1	1	1	1	NA	NA	NA	NA	NA	0	0	0	0	1	0	1	0
NM_031905	83787	SVH || SVH protein (2)	3.1463	1.01229	0.321739	2.03061	0	0	0	0	0	0	0	0	0	0	0	0	0	NA	NA	2	0	0	1	0	0	0	0	0	0	0	0	0	0	1	0	0	0
NM_003720	8624	DSCR2 || Down syndrome critical region gene 2 (1)	3.13614	1.4785	0.47144	2.81378	0	0	1	0	0	0	0	0	0	0	0	0	0	NA	-17.4	0	0	0	0	0	0	0	0	0	0	0	0	0	0	0	0	0	0
NM_001039671	90522	YIF1B || Yip1 interacting factor homolog B (S. cerevisiae) (2)	3.10458	1.60879	0.5182	2.92442	0	0	0	0	0	0	0	0	0	0	0	0	0	NA	NA	1	1	1	1	1	NA	NA	NA	NA	NA	0	0	0	0	1	1	1	1
NM_012383	26578	OSTF1 || osteoclast stimulating factor 1 (1)	3.08479	1.18213	0.38321	2.28276	0	0	1	0	0	1	0	0	0	0	0	0	1	-0.1624	-18.97	0	0	0	0	0	0	0	0	0	0	1	0	0	0	0	0	0	0
NM_002631	5226	PGD || phosphogluconate dehydrogenase (1)	3.07617	1.30223	0.423328	2.53441	0	0	1	1	1	1	1	0	0	0	0	0	1	-0.252	NA	3	1	0	0	0	0	0	0	0	0	1	0	1	0	0	0	0	0
NA	441454	na || hypothetical gene supported by BC013859 (1)	3.05314	1.96604	0.643941	3.64535	0	0	NA	NA	NA	NA	NA	0	0	0	0	0	0	NA	NA	NA	NA	NA	NA	NA	NA	NA	NA	NA	NA	NA	NA	NA	NA	NA	NA	NA	NA
NM_178837	352909	LOC352909 || similar to hypothetical testis protein from macaque (2)	3.04812	1.89558	0.621883	3.81985	0	0	1	0	0	0	0	0	0	0	0	0	0	NA	-20.45	0	0	0	0	0	NA	NA	NA	NA	NA	0	0	0	0	0	0	0	0
NM_001546	3400	ID4 || inhibitor of DNA binding 4, dominant negative helix-loop-helix protein (1)	2.99016	1.09683	0.366814	2.11965	0	0	1	1	0	1	0	1	0	1	0	1	0	-0.0945	NA	0	0	0	0	0	0	0	0	0	0	1	1	0	0	0	0	0	0
NM_000165	2697	GJA1 || gap junction protein, alpha 1, 43kDa (connexin 43) (2)	2.94321	1.57629	0.535569	2.94904	0	0	3	3	2	2	2	1	1	0	0	1	0	-0.845	-27.59	0	0	0	0	0	0	0	0	0	0	2	2	2	2	0	0	0	0
NM_001002857	302	ANXA2 || annexin A2 (2)	2.9141	1.74677	0.599419	3.66757	0	0	1	1	1	1	1	1	0	0	0	1	0	-0.4007	-17.66	0	0	0	0	0	0	0	0	0	0	1	1	1	1	0	0	0	0
NM_001080533	84747	MGC5139 || hypothetical protein MGC5139 (1)	2.90021	1.22955	0.42395	2.32602	0	0	4	2	2	3	2	0	0	0	0	1	1	-0.7179	-19.16	0	0	0	0	0	1	0	0	0	0	3	0	2	1	0	0	0	0
NM_003012	6422	SFRP1 || secreted frizzled-related protein 1 (1)	2.88881	1.48788	0.515048	2.89555	0	0	2	1	1	1	1	1	0	1	0	1	0	-0.5248	NA	0	0	0	0	0	0	0	0	0	0	1	0	1	1	0	0	0	0
NM_014060	28985	MC11 || malignant T cell amplified sequence 1 (1)	2.87219	1.14204	0.39762	2.23645	0	0	0	0	0	0	0	0	0	0	0	0	0	NA	NA	0	0	0	0	0	1	0	0	0	0	0	0	0	0	0	0	0	0
NA	441456	na || hypothetical gene supported by BC013859; BC070480 (1)	2.84829	1.4627	0.513535	2.68569	0	0	NA	NA	NA	NA	NA	0	0	0	0	0	0	NA	NA	NA	NA	NA	NA	NA	NA	NA	NA	NA	NA	NA	NA	NA	NA	NA	NA	NA	NA
NM_003027	6457	SH3GL3 || SH3-domain GRB2-like 3 (1)	2.84319	1.13787	0.400211	2.19812	0	0	1	1	1	0	0	0	0	0	0	0	1	-0.2157	-22.58	1	1	1	0	0	0	0	0	0	0	0	0	1	0	0	0	1	0
NM_021109	7114	TMSB4X || thymosin, beta 4, X-linked (1)	2.80948	1.58367	0.563687	2.89053	0	0	1	1	1	1	1	0	0	0	0	0	1	-0.3887	-18.91	0	0	0	0	0	0	0	0	0	0	NA	NA	NA	NA	0	0	0	0
NM_032667	26580	BSCL2 || Bernardinelli-Seip congenital lipodystrophy 2 (seipin) (1)	2.80852	1.19113	0.424112	2.24195	0	0	1	1	1	1	1	1	0	0	0	1	0	-0.2579	-17.84	0	0	0	0	0	0	0	0	0	0	1	1	1	1	0	0	0	0
NA	440921	LOC440921 || similar to MGC23908 (1)	2.80827	1.18121	0.420617	2.30643	0	0	NA	NA	NA	NA	NA	0	0	0	0	0	0	NA	NA	NA	NA	NA	NA	NA	NA	NA	NA	NA	NA	NA	NA	NA	NA	NA	NA	NA	NA
NM_001084392	1652	DDT || D-dopachrome tautomerase (2)	2.76563	1.44975	0.524203	2.86453	0	0	1	1	1	0	0	0	0	0	0	0	1	-0.1735	NA	0	0	0	0	0	0	0	0	0	0	0	0	1	0	0	0	0	0
NA	376	ARF2 || ADP-ribosylation factor 2 (1)	2.74	1.34592	0.49121	2.71453	0	0	NA	NA	NA	NA	NA	0	0	0	0	0	0	NA	NA	NA	NA	NA	NA	NA	NA	NA	NA	NA	NA	NA	NA	NA	NA	NA	NA	NA	NA
NA	341306	na || similar to ribosomal protein L10 (1)	2.70728	1.34871	0.498178	2.51001	0	0	NA	NA	NA	NA	NA	0	0	0	0	0	0	NA	NA	NA	NA	NA	NA	NA	NA	NA	NA	NA	NA	NA	NA	NA	NA	NA	NA	NA	NA
NA	378464	MO1 || protein containing single MORN motif in testis (1)	2.69879	1.66413	0.61662	3.25629	0	0	NA	NA	NA	NA	NA	0	0	0	0	0	0	NA	NA	NA	NA	NA	NA	NA	NA	NA	NA	NA	NA	NA	NA	NA	NA	NA	NA	NA	NA
NM_004578	5867	RAB4A || RAB4A, member RAS oncogene family (1)	2.69674	1.23017	0.456168	2.30806	0	0	0	2	0	0	0	0	0	0	0	0	0	NA	-17.34	0	0	0	0	0	0	0	0	0	0	0	0	0	0	0	0	0	0
NM_174902	143458	LOC143458 || hypothetical protein LOC143458 (1)	2.68935	1.17538	0.437049	2.30426	0	0	1	0	0	0	0	0	0	0	0	0	0	NA	-20.73	0	0	0	0	0	NA	NA	NA	NA	NA	0	0	0	0	0	0	0	0
NM_005324	3021	H3F3B || H3 histone, family 3B (H3.3B) (1)	2.65291	1.19717	0.451265	2.26156	0	0	1	2	0	1	0	1	1	0	1	1	0	-0.182	-18.38	0	0	0	0	0	0	0	0	0	0	1	1	0	0	0	0	0	0
NM_017615	54780	C10orf86 || chromosome 10 open reading frame 86 (2)	2.64088	1.20829	0.457534	2.30458	0	0	0	0	0	0	0	0	0	0	0	0	0	NA	NA	1	1	1	1	1	NA	NA	NA	NA	NA	0	0	0	0	1	1	1	1
NM_001010875	253512	SLC25A30 || solute carrier family 25, member 30 (1)	2.62851	1.25808	0.478631	2.41803	0	0	0	0	0	0	0	0	0	0	1	0	0	NA	NA	0	0	0	0	0	0	0	0	0	0	0	0	0	0	0	0	0	0
NM_018290	55276	PGM2 || phosphoglucomutase 2 (1)	2.62766	1.86017	0.707917	3.27441	0	0	2	2	2	0	0	0	0	0	1	0	1	-0.5426	-20.58	0	0	0	0	0	NA	NA	NA	NA	NA	0	0	2	0	0	0	0	0
NM_022490	64425	PAF53 || RNA polymerase I associated factor 53 (1)	2.62613	0.97475	0.371174	1.95628	0	0	0	0	0	0	0	0	0	0	0	0	0	NA	NA	0	0	0	0	0	0	0	0	0	0	0	0	0	0	0	0	0	0
NM_014623	4201	MEA || male-enhanced antigen (1)	2.61454	1.46517	0.560392	2.90075	0	0	1	1	1	1	1	1	0	0	0	1	0	-0.3496	-18.94	0	0	0	0	0	0	0	0	0	0	1	1	1	0	0	0	0	0
NM_005833	10244	RAB9P40 || Rab9 effector p40 (2)	2.60077	0.99525	0.382674	1.9705	0	0	0	0	0	0	0	0	0	0	0	0	0	NA	NA	4	1	1	3	1	0	0	0	0	0	0	0	0	0	3	0	1	0
NM_001083588	1875	E2F5 || E2F transcri1ion factor 5, p130-binding (1)	2.59614	1.45104	0.558922	2.59097	0	0	1	2	1	1	1	1	0	1	0	1	0	-0.3842	NA	1	0	0	1	0	NA	NA	NA	NA	NA	1	1	1	1	1	0	0	0
NM_018344	55315	SLC29A3 || solute carrier family 29 (nucleoside transporters), member 3 (1)	2.5579	1.19933	0.468875	2.24437	0	0	4	1	1	3	1	0	0	0	0	0	1	-0.3367	-20.41	0	0	0	0	0	0	0	0	0	0	3	0	1	0	0	0	0	0
NM_020936	57696	DDX55 || DEAD (Asp-Glu-Ala-Asp) box polype1ide 55 (1)	2.53315	1.17558	0.464079	2.22646	0	0	2	1	1	1	1	0	0	0	0	0	1	-0.4273	-17.7	0	0	0	0	0	NA	NA	NA	NA	NA	1	0	1	0	0	0	0	0
NA	440151	na || LOC440151 (1)	2.5203	1.22475	0.485954	2.39466	0	0.0386455	NA	NA	NA	NA	NA	0	0	0	0	0	0	NA	NA	NA	NA	NA	NA	NA	NA	NA	NA	NA	NA	NA	NA	NA	NA	NA	NA	NA	NA
NM_018224	55744	FLJ10803 || hypothetical protein FLJ10803 (2)	2.51532	1.031	0.409888	2.07633	0	0.0858705	0	0	0	0	0	0	0	0	0	0	0	NA	NA	1	0	0	1	0	0	0	0	0	0	0	0	0	0	1	0	0	0
NM_004056	767	CA8 || carbonic anhydrase VIII (1)	2.49517	1.06837	0.428177	2.1865	0	0.288423	1	1	1	0	0	0	0	0	0	0	1	-0.1561	NA	0	0	0	0	0	0	0	0	0	0	0	0	1	0	0	0	0	0
NM_014603	30850	HUMPPA || paraneoplastic antigen (1)	2.49497	1.52287	0.610379	2.67454	0	0.290582	1	1	1	0	0	0	0	0	0	0	1	-0.037	-20.1	0	0	0	0	0	0	0	0	0	0	0	0	1	0	0	0	0	0
NM_001035512	6391	SDHC || succinate dehydrogenase complex, subunit C, integral membrane protein, 15kDa (2)	2.44475	1.18092	0.483043	2.19461	0	0.881769	0	1	0	0	0	0	0	0	0	0	0	NA	NA	0	0	0	0	0	NA	NA	NA	NA	NA	0	0	0	0	0	0	0	0
NM_022075	29956	LASS2 || LAG1 longevity assurance homolog 2 (S. cerevisiae) (2)	2.41228	0.95775	0.397032	1.98134	0	1.33497	1	1	1	0	0	0	0	0	1	0	1	-0.2232	-16.61	0	0	0	0	0	0	0	0	0	0	0	0	1	0	0	0	0	0
NA	79897	RPP21 || ribonuclease P 21kDa subunit (1)	2.40546	1.74207	0.724217	3.54349	0	1.4377	NA	NA	NA	NA	NA	0	0	0	0	0	0	NA	NA	NA	NA	NA	NA	NA	NA	NA	NA	NA	NA	NA	NA	NA	NA	NA	NA	NA	NA
NM_001017369	6307	SC4MOL || sterol-C4-methyl oxidase-like (1)	2.40172	1.19758	0.498635	2.40966	0	1.49518	0	0	0	0	0	0	0	0	0	0	0	NA	NA	0	0	0	0	0	0	0	0	0	0	0	0	0	0	0	0	0	0
NM_003141	6737	TRIM21 || tripartite motif-containing 21 (1)	2.40141	1.11112	0.462697	2.18181	0	1.50003	1	1	1	0	0	0	0	0	0	0	1	-0.2086	-16.73	0	0	0	0	0	0	0	0	0	0	0	0	1	0	0	0	0	0
NM_012129	9069	CLDN12 || claudin 12 (1)	2.39414	0.934125	0.390172	1.88496	0	1.61447	1	1	1	0	0	0	0	0	0	0	1	-0.1766	-19.24	1	2	1	1	1	0	0	0	0	0	0	0	1	0	1	0	1	1
NM_080430	140606	SELM || selenoprotein M (1)	2.36087	1.11142	0.470765	2.21119	0	2.17909	0	0	0	0	0	0	0	0	0	0	0	NA	NA	1	1	1	1	1	0	0	0	0	0	0	0	0	0	1	0	1	0
NM_001007269	79760	GEMIN7 || gem (nuclear organelle) associated protein 7 (1)	2.35181	0.953546	0.405451	1.9318	0	2.34511	0	0	0	0	0	0	0	0	0	0	0	NA	NA	1	1	1	0	0	0	0	0	0	0	0	0	0	0	0	0	1	0
NM_014408	27095	TRAPPC3 || trafficking protein particle complex 3 (2)	2.32789	1.12533	0.483414	2.22495	0	2.80973	3	3	1	0	0	1	0	0	1	1	0	-0.274	-21.94	0	0	0	0	0	0	0	0	0	0	0	0	1	1	0	0	0	0
NM_000270	4860	NP || nucleoside phosphorylase (2)	2.32655	1.13173	0.48644	2.13056	0	2.83675	2	1	1	0	0	0	0	0	1	0	1	-0.2062	-17.43	2	1	1	1	0	0	0	0	0	0	0	0	1	0	1	0	1	0
NM_022746	64757	FLJ22390 || hypothetical protein FLJ22390 (1)	2.29504	1.42337	0.620197	2.8064	0	3.51231	1	0	0	0	0	0	0	0	0	0	0	NA	-16.62	0	0	0	0	0	NA	NA	NA	NA	NA	0	0	0	0	0	0	0	0
NM_015670	26168	SENP3 || SUMO1/sentrin/SMT3 specific protease 3 (1)	2.29006	0.996	0.434923	1.9682	0	3.62545	0	0	0	0	0	0	0	0	0	0	0	NA	NA	1	1	1	1	1	0	0	0	0	0	0	0	0	0	1	1	1	1
NM_001310	1389	CREBL2 || cAMP responsive element binding protein-like 2 (1)	2.28208	0.890604	0.390259	1.85773	0	3.81078	2	2	1	2	1	1	0	0	0	1	0	-0.3168	-20.82	0	0	0	0	0	1	0	0	0	0	2	2	1	1	0	0	0	0
NM_024936	29063	ZCCHC4 || zinc finger, CCHC domain containing 4 (2)	2.27009	1.344	0.592047	2.39824	0	4.09842	2	0	0	1	0	0	0	0	0	0	0	NA	NA	1	2	1	0	0	NA	NA	NA	NA	NA	1	0	0	0	0	0	1	0
NM_018698	55916	NXT2 || nuclear transport factor 2-like export factor 2 (2)	2.26439	1.16442	0.514231	2.38286	0	4.23904	1	2	1	1	1	0	0	0	0	0	1	-0.5145	-29.77	0	0	0	0	0	0	0	0	0	0	1	0	1	0	0	0	0	0
NM_000402	2539	G6PD || glucose-6-phosphate dehydrogenase (1)	2.26281	1.4419	0.637217	2.74574	0	4.27836	3	3	3	0	0	1	0	0	0	1	1	-0.3339	-18.53	0	1	0	0	0	0	0	0	0	0	0	0	3	2	0	0	0	0
NM_007071	11147	HHLA3 || HERV-H LTR-associating 3 (1)	2.25371	1.07667	0.47773	2.05446	0	4.50894	1	1	1	1	1	0	0	0	0	0	0	NA	-19.22	0	0	0	0	0	0	0	0	0	0	1	0	1	0	0	0	0	0
NM_006367	10487	CAP1 || CAP, adenylate cyclase-associated protein 1 (yeast) (1)	2.24986	1.1245	0.49981	2.248	0	4.60867	3	0	0	1	0	1	0	0	1	1	0	-0.1057	-21.99	1	0	0	0	0	0	0	0	0	0	1	1	0	0	0	0	0	0
NM_025147	80219	FLJ13448 || hypothetical protein FLJ13448 (2)	2.24583	1.23988	0.552078	2.46617	0	4.71396	0	0	0	0	0	0	0	0	0	0	0	NA	NA	1	1	1	0	0	0	0	0	0	0	0	0	0	0	0	0	1	0
NM_001098620	5094	PCBP2 || poly(rC) binding protein 2 (3)	2.23711	0.984833	0.440225	1.92656	0	4.94654	0	0	0	0	0	0	0	0	0	0	0	NA	-17.21	3	0	0	3	0	0	0	0	0	0	0	0	0	0	3	2	0	0
NM_005719	10094	ARPC3 || actin related protein 2/3 complex, subunit 3, 21kDa (2)	2.23017	1.27267	0.570658	2.28539	0	5.13603	1	1	1	0	0	0	0	0	0	0	1	-0.1871	NA	1	0	0	0	0	0	0	0	0	0	0	0	1	0	0	0	0	0
NM_016395	51495	HSPC121 || butyrate-induced transcri1 1 (2)	2.22454	1.40692	0.632454	2.85129	0.908105	5.29288	4	3	3	1	1	0	1	0	0	1	1	-0.8036	-22.16	2	1	1	2	1	0	0	0	0	0	1	1	3	2	2	0	1	0
NM_006304	7979	SHFM1 || split hand/foot malformation (ectrodactyly) type 1 (1)	2.20301	1.13451	0.51498	2.14855	0.908105	5.91587	0	1	0	0	0	0	0	0	0	0	0	NA	-18.62	0	0	0	0	0	0	0	0	0	0	0	0	0	0	0	0	0	0
NM_005643	6882	TAF11 || TAF11 RNA polymerase II, TATA box binding protein (TBP)-associated factor, 28kDa (1)	2.1923	0.778292	0.355012	1.72387	0.908105	6.24047	0	0	0	0	0	0	0	0	0	0	0	NA	NA	0	0	0	0	0	0	0	0	0	0	0	0	0	0	0	0	0	0
NM_001001586	476	ATP1A1 || ATPase, Na+/K+ transporting, alpha 1 polype1ide (1)	2.18577	0.981833	0.449194	1.95188	0.908105	6.44304	0	0	0	0	0	0	0	0	0	0	0	NA	NA	0	0	0	0	0	0	0	0	0	0	0	0	0	0	0	0	0	0
NM_152263	7170	TPM3 || tropomyosin 3 (5)	2.17824	1.18783	0.545317	2.33226	0.908105	6.68102	8	1	0	6	0	1	0	0	0	0	1	-0.0313	-27.29	0	0	0	0	0	0	0	0	0	0	6	0	0	0	0	0	0	0
NM_001126	159	ADSS || adenylosuccinate synthase (1)	2.17528	1.33267	0.612643	2.77578	0.908105	6.77627	0	1	0	0	0	0	0	0	0	0	0	NA	-19.87	0	0	0	0	0	0	0	0	0	0	0	0	0	0	0	0	0	0
NM_025125	80195	C10orf57 || chromosome 10 open reading frame 57 (1)	2.16561	0.924125	0.426727	1.92919	0.908105	7.09177	1	1	0	1	0	0	0	0	0	0	1	-0.1661	-19.37	0	0	0	0	0	NA	NA	NA	NA	NA	1	0	0	0	0	0	0	0
NA	441109	na || hypothetical gene supported by AL713721 (1)	2.14779	1.10467	0.51433	2.11653	0.908105	7.69503	NA	NA	NA	NA	NA	0	0	0	0	0	0	NA	NA	NA	NA	NA	NA	NA	NA	NA	NA	NA	NA	NA	NA	NA	NA	NA	NA	NA	NA
NM_003172	6834	SURF1 || surfeit 1 (1)	2.1427	0.882867	0.412034	1.81339	0.908105	7.87249	0	0	0	0	0	0	0	0	0	0	0	NA	NA	1	0	0	1	0	NA	NA	NA	NA	NA	0	0	0	0	1	0	0	0
NM_002696	5436	POLR2G || polymerase (RNA) II (DNA directed) polype1ide G (1)	2.14045	1.09807	0.513007	2.27745	0.908105	7.95164	0	0	0	0	0	0	0	0	0	0	0	NA	NA	1	1	1	1	1	0	0	0	0	0	0	0	0	0	1	0	1	0
NM_033112	88745	C6orf153 || chromosome 6 open reading frame 153 (1)	2.13633	0.898292	0.420483	1.8668	0.908105	8.09783	0	1	0	0	0	0	0	0	0	0	0	NA	-19.13	0	0	0	0	0	NA	NA	NA	NA	NA	0	0	0	0	0	0	0	0
NM_002196	3642	INSM1 || insulinoma-associated 1 (1)	2.13146	1.17271	0.55019	2.19545	0.908105	8.27275	1	1	1	1	1	0	0	0	0	0	1	-0.2615	-22.27	0	0	0	0	0	0	0	0	0	0	1	0	1	0	0	0	0	0
NA	286157	na || similar to mCBP (1)	2.1232	0.959167	0.451756	1.92526	0.908105	8.57438	NA	NA	NA	NA	NA	0	0	0	0	0	0	NA	NA	NA	NA	NA	NA	NA	NA	NA	NA	NA	NA	NA	NA	NA	NA	NA	NA	NA	NA
NM_001743	805	CALM2 || calmodulin 2 (phosphorylase kinase, delta) (1)	2.11742	1.09573	0.517483	2.31595	0.908105	8.78873	2	0	0	1	0	1	1	0	0	1	0	-0.1765	-18.16	1	0	0	0	0	0	0	0	0	0	1	1	0	0	0	0	0	0
NM_139207	4673	NAP1L1 || nucleosome assembly protein 1-like 1 (2)	2.11169	1.31442	0.622448	2.58449	0.908105	9.00471	2	0	0	1	0	0	0	0	0	0	1	-0.1705	NA	0	0	0	0	0	0	0	0	0	0	1	0	0	0	0	0	0	0
NM_005715	10090	UST || uronyl-2-sulfotransferase (2)	2.1004	0.977958	0.465605	1.99919	0.908105	9.4387	3	5	3	2	2	1	1	0	1	1	1	-0.779	-18.94	1	1	0	0	0	0	0	0	0	0	2	1	3	2	0	0	0	0
NM_001002296	51125	GOLGA7 || golgi autoantigen, golgin subfamily a, 7 (1)	2.097	0.759958	0.362403	1.70978	0.908105	9.572	2	0	0	0	0	0	0	0	0	0	0	NA	NA	0	1	0	0	0	0	0	0	0	0	0	0	0	0	0	0	0	0
NM_003442	7702	ZNF143 || zinc finger protein 143 (clone pHZ-1) (2)	2.08318	1.28746	0.618025	2.39206	0.908105	10.1238	1	0	0	0	0	0	0	0	0	0	0	NA	-17.14	2	0	0	2	0	0	0	0	0	0	0	0	0	0	2	0	0	0
NM_018386	55795	FLJ11305 || hypothetical protein FLJ11305 (1)	2.06801	0.722646	0.34944	1.65867	0.908105	10.7504	0	0	0	0	0	0	0	0	0	0	0	NA	NA	1	0	0	1	0	NA	NA	NA	NA	NA	0	0	0	0	1	0	0	0
NM_016202	51157	ZNF580 || zinc finger protein 580 (1)	2.05351	1.49354	0.727313	2.55158	0.908105	11.37	2	1	1	0	0	1	0	1	0	1	0	-0.1543	-23.68	0	0	0	0	0	0	0	0	0	0	0	0	1	1	0	0	0	0
NA	389906	LOC389906 || similar to Serine/threonine-protein kinase PRKX (Protein kinase PKX1) (1)	2.04587	0.943458	0.461152	1.97006	0.908105	11.7043	NA	NA	NA	NA	NA	0	0	0	0	0	0	NA	NA	NA	NA	NA	NA	NA	NA	NA	NA	NA	NA	NA	NA	NA	NA	NA	NA	NA	NA
NM_014771	9810	RNF40 || ring finger protein 40 (1)	2.03926	1.06933	0.524374	2.02818	1.68876	11.9984	2	0	0	1	0	1	0	0	0	1	0	-0.0827	-18.93	0	0	0	0	0	0	0	0	0	0	1	1	0	0	0	0	0	0
NM_014445	27230	SERP1 || stress-associated endoplasmic reticulum protein 1 (1)	2.02777	1.3715	0.67636	2.4367	1.68876	12.5196	5	0	0	3	0	1	0	0	1	1	0	-0.3644	-22.6	0	0	0	0	0	1	1	1	0	0	3	3	0	0	0	0	0	0
NM_173039	282679	AQP11 || aquaporin 11 (2)	2.02659	0.815667	0.402482	1.79176	1.68876	12.5737	0	0	0	0	0	0	0	0	0	0	0	NA	NA	1	0	0	0	0	0	0	0	0	0	0	0	0	0	0	0	0	0
NM_001079841	54940	OCIAD1 || OCIA domain containing 1 (2)	2.01727	1.3585	0.673435	2.41305	1.68876	13.0073	0	0	0	0	0	0	0	0	0	0	0	NA	NA	1	1	1	1	1	0	0	0	0	0	0	0	0	0	1	0	1	0
NM_001083926	80150	ASRGL1 || asparaginase like 1 (1)	2.00481	0.942458	0.470099	1.89183	1.68876	13.6001	1	1	1	1	1	0	0	0	0	0	1	-0.4025	-20.31	0	0	0	0	0	0	0	0	0	0	1	0	1	0	0	0	0	0
NM_006079	10370	CITED2 || Cbp/p300-interacting transactivator, with Glu/Asp-rich carboxy-terminal domain, 2 (1)	1.99336	1.08033	0.541966	2.06415	1.68876	14.1585	1	2	1	0	0	0	0	0	0	1	0	-0.2494	-21.14	0	0	0	0	0	0	0	0	0	0	0	0	1	1	0	0	0	0
NM_080916	1716	DGUOK || deoxyguanosine kinase (2)	1.98811	0.952542	0.47912	2.05418	1.68876	14.4192	0	0	0	0	0	0	0	0	0	0	0	NA	NA	2	2	2	2	2	0	0	0	0	0	0	0	0	0	2	0	2	0
NM_007011	11057	ABHD2 || abhydrolase domain containing 2 (2)	1.98495	0.986708	0.497095	1.98265	1.68876	14.5771	3	4	2	2	1	0	0	0	0	1	1	-0.3545	NA	2	2	1	2	1	0	0	0	0	0	2	0	2	1	2	1	1	1
NM_004622	7247	1N || translin (4)	1.98179	0.921604	0.465035	1.89995	1.68876	14.7359	0	0	0	0	0	0	0	0	0	0	0	NA	-17.54	1	1	1	1	1	0	0	0	0	0	0	0	0	0	1	1	1	1
NM_021238	58516	FAM60A || family with sequence similarity 60, member A (1)	1.98163	0.765792	0.386446	1.7553	1.68876	14.7443	0	0	0	0	0	0	0	0	0	0	0	NA	-17.27	0	0	0	0	0	0	0	0	0	0	0	0	0	0	0	0	0	0
NM_006493	1203	CLN5 || ceroid-lipofuscinosis, neuronal 5 (1)	1.97934	0.948767	0.479336	1.92847	1.68876	14.8604	1	3	1	1	1	0	0	0	0	0	1	-0.4175	-19.56	0	0	0	0	0	0	1	0	0	0	1	0	1	0	0	0	0	0
NM_014820	9868	TOMM70A || translocase of outer mitochondrial membrane 70 homolog A (yeast) (1)	1.97586	0.732125	0.370534	1.68324	1.68876	15.0373	1	2	0	1	0	0	0	0	0	0	1	-0.1402	-20.63	0	0	0	0	0	0	0	0	0	0	1	0	0	0	0	0	0	0
NA	389137	na || similar to SVH-B (1)	1.9723	0.847875	0.429891	1.7655	1.68876	15.2199	NA	NA	NA	NA	NA	0	0	0	0	0	0	NA	NA	NA	NA	NA	NA	NA	NA	NA	NA	NA	NA	NA	NA	NA	NA	NA	NA	NA	NA
NM_005112	9948	WDR1 || WD repeat domain 1 (2)	1.96488	0.694333	0.353372	1.64794	1.68876	15.6045	1	1	1	1	1	1	1	0	0	1	0	-0.3206	-16.82	0	0	0	0	0	0	0	0	0	0	1	1	1	0	0	0	0	0
NM_004965	3150	HMGN1 || high-mobility group nucleosome binding domain 1 (2)	1.96433	1.07495	0.547235	2.21139	1.68876	15.6332	1	1	1	1	1	1	0	0	0	1	0	-0.3631	-17.23	0	0	0	0	0	0	0	0	0	0	1	0	1	1	0	0	0	0
NM_152420	138199	C9orf41 || chromosome 9 open reading frame 41 (1)	1.96174	0.795583	0.405551	1.72456	1.68876	15.7691	0	0	0	0	0	0	0	0	0	0	0	NA	-17.21	0	0	0	0	0	0	0	0	0	0	0	0	0	0	0	0	0	0
NM_080392	8073	1P4A2 || protein tyrosine phosphatase type IVA, member 2 (4)	1.95827	1.02333	0.52257	1.98885	1.68876	15.9518	0	0	0	0	0	0	0	0	0	0	0	NA	NA	0	0	0	0	0	0	0	0	0	0	0	0	0	0	0	0	0	0
NM_014876	9929	KIAA0063 || KIAA0063 gene product (1)	1.95729	0.662292	0.338372	1.59684	1.68876	16.0035	1	1	1	1	1	0	1	1	0	1	0	-0.2406	NA	0	0	0	0	0	0	1	0	0	0	1	1	1	1	0	0	0	0
NM_001024226	375	ARF1 || ADP-ribosylation factor 1 (1)	1.94547	0.669096	0.343925	1.59913	2.17126	16.6363	1	0	0	1	0	0	0	0	0	0	1	-0.0036	-17.95	1	1	0	0	0	0	0	0	0	0	1	0	0	0	0	0	0	0
NM_001013399	892	CCNC || cyclin C (1)	1.93906	1.2105	0.624271	2.20308	2.17126	16.9854	1	1	1	0	0	0	0	0	0	0	1	NA	-18.13	0	0	0	0	0	0	0	0	0	0	0	0	1	0	0	0	0	0
NM_030920	81611	ANP32E || acidic (leucine-rich) nuclear phosphoprotein 32 family, member E (1)	1.93434	0.91944	0.475325	1.8811	2.17126	17.245	2	0	0	1	0	0	0	0	0	0	1	-0.1886	-19.56	0	0	0	0	0	0	0	0	0	0	1	0	0	0	0	0	0	0
NM_003370	7408	VASP || vasodilator-stimulated phosphoprotein (1)	1.93306	1.01392	0.524514	1.9687	2.17126	17.316	1	1	1	0	0	0	0	0	0	0	1	-0.1736	-16.53	0	0	0	0	0	0	1	0	0	0	0	0	1	0	0	0	0	0
NM_016355	51202	DDX47 || DEAD (Asp-Glu-Ala-Asp) box polype1ide 47 (2)	1.91253	0.777583	0.406574	1.71072	2.17126	18.4738	0	0	0	0	0	0	0	0	0	0	0	NA	NA	3	2	2	1	0	NA	NA	NA	NA	NA	0	0	0	0	1	0	2	1
NA	114112	TXNRD3 || thioredoxin reductase 3 (1)	1.90936	0.911625	0.477451	1.82099	2.17126	18.6561	NA	NA	NA	NA	NA	0	0	0	0	0	0	NA	NA	NA	NA	NA	NA	NA	NA	NA	NA	NA	NA	NA	NA	NA	NA	NA	NA	NA	NA
NM_002775	5654	PRSS11 || protease, serine, 11 (IGF binding) (2)	1.90288	0.662854	0.348344	1.57352	2.17126	19.0325	0	0	0	0	0	0	0	0	0	0	0	NA	NA	0	0	0	0	0	0	0	0	0	0	0	0	0	0	0	0	0	0
NM_201428	10313	RTN3 || reticulon 3 (1)	1.90039	0.748696	0.393969	1.67106	2.17126	19.1777	1	1	0	1	0	0	0	0	0	0	1	-0.1346	-18.46	2	0	0	2	0	0	0	0	0	0	1	0	0	0	2	0	0	0
NM_152417	137695	FLJ32370 || hypothetical protein FLJ32370 (1)	1.89989	0.869862	0.45785	1.81823	2.17126	19.2074	2	1	1	0	0	0	0	0	0	0	1	-0.2553	NA	0	0	0	0	0	0	0	0	0	0	0	0	1	0	0	0	0	0
NM_007062	11137	PWP1 || PWP1 homolog (S. cerevisiae) (1)	1.89332	0.86475	0.456736	1.89689	2.17126	19.5945	1	1	1	0	0	0	0	0	0	0	1	-0.2094	-19.57	0	0	0	0	0	0	0	0	0	0	0	0	1	0	0	0	0	0
NM_006709	10919	BAT8 || HLA-B associated transcri1 8 (1)	1.89106	0.701125	0.370759	1.60917	2.17126	19.7294	1	1	1	0	0	0	0	0	0	0	1	-0.1516	NA	3	0	0	0	0	NA	NA	NA	NA	NA	0	0	1	0	0	0	0	0
NM_014456	27250	PDCD4 || programmed cell death 4 (neoplastic transformation inhibitor) (2)	1.8892	1.04883	0.555175	2.1678	2.17126	19.8403	2	0	0	2	0	1	1	0	1	1	1	-0.2537	NA	0	1	0	0	0	0	0	0	0	0	2	1	0	0	0	0	0	0
NM_001018109	8544	PIR || pirin (iron-binding nuclear protein) (1)	1.88417	1.00052	0.531012	2.04907	2.17126	20.1418	1	0	0	1	0	0	0	0	0	0	1	-0.1291	-18.78	1	1	1	0	0	0	0	0	0	0	1	0	0	0	0	0	1	0
NM_025235	80351	TNKS2 || tankyrase, TRF1-interacting ankyrin-related ADP-ribose polymerase 2 (1)	1.88301	0.779875	0.414165	1.74091	2.17126	20.2119	5	4	3	3	2	1	1	0	0	1	1	-0.8987	-21.3	0	2	0	0	0	0	0	0	0	0	3	2	3	1	0	0	0	0
NM_024041	79005	SCNM1 || sodium channel modifier 1 (2)	1.87882	1.11496	0.593435	2.05745	2.17126	20.4653	0	0	0	0	0	0	0	0	0	0	0	NA	NA	1	1	1	1	1	0	0	0	0	0	0	0	0	0	1	0	1	0
NM_003068	6591	SNAI2 || snail homolog 2 (Drosophila) (2)	1.87868	0.906292	0.482408	1.88824	2.17126	20.4736	1	1	1	0	0	0	1	0	0	0	1	-0.1891	NA	1	0	0	1	0	0	0	0	0	0	0	0	1	0	1	0	0	0
NM_003943	8987	GENX-3414 || genethonin 1 (1)	1.87066	1.04234	0.557207	2.00152	3.23017	20.9647	0	0	0	0	0	0	0	0	0	0	0	NA	NA	1	0	0	1	0	0	0	0	0	0	0	0	0	0	1	0	0	0
NM_001660	378	ARF4 || ADP-ribosylation factor 4 (2)	1.85568	0.779833	0.420241	1.75675	3.23017	21.8978	2	0	0	1	0	1	0	0	1	1	0	-0.1579	-20.02	1	0	0	0	0	0	0	0	0	0	1	1	0	0	0	0	0	0
NM_182705	359845	MGC45871 || hypothetical protein MGC45871 (1)	1.85524	1.06529	0.574206	1.95303	3.23017	21.9254	4	1	1	1	0	0	0	0	0	1	1	-0.2411	-18.17	0	0	0	0	0	NA	NA	NA	NA	NA	1	0	1	1	0	0	0	0
NM_032933	85019	C18orf45 || chromosome 18 open reading frame 45 (1)	1.85201	0.844808	0.456158	1.81711	3.23017	22.1302	1	0	0	0	0	0	0	0	0	0	0	NA	NA	2	0	0	0	0	0	0	0	0	0	0	0	0	0	0	0	0	0
NM_017602	55593	DKFZp761A052 || hypothetical protein DKFZp761A052 (1)	1.84938	1.07877	0.583316	2.04881	3.23017	22.2973	3	1	0	1	0	0	0	0	0	1	0	0.0079	-17.48	1	1	1	1	1	0	0	0	0	0	1	1	0	0	1	1	1	1
NM_138794	127018	LYPLAL1 || lysophospholipase-like 1 (2)	1.83409	1.12633	0.614109	2.33259	3.23017	23.2821	0	0	0	0	0	0	0	0	0	0	0	NA	NA	1	1	1	1	1	NA	NA	NA	NA	NA	0	0	0	0	1	1	1	1
NM_006145	3337	DNAJB1 || DnaJ (Hsp40) homolog, subfamily B, member 1 (2)	1.82251	0.919542	0.504546	1.82103	3.23017	24.0434	1	0	0	1	0	0	0	0	0	0	1	0.0019	-19.26	2	2	2	2	2	NA	NA	NA	NA	NA	1	0	0	0	2	2	2	2
NM_001004106	2870	GRK6 || G protein-coupled rece1or kinase 6 (1)	1.81497	0.788708	0.434558	1.6918	3.23017	24.5465	1	1	1	0	0	1	0	0	0	1	0	-0.1447	-19.17	0	0	0	0	0	0	0	0	0	0	0	0	1	1	0	0	0	0
NM_001283	1174	AP1S1 || ada1or-related protein complex 1, sigma 1 subunit (3)	1.80104	1.21021	0.671951	2.25791	3.23017	25.4899	1	1	1	0	0	0	0	0	0	0	0	NA	-17.59	0	0	0	0	0	0	0	0	0	0	0	0	1	1	0	0	0	0
NM_012329	23531	MMD || monocyte to macrophage differentiation-associated (1)	1.80051	0.781	0.433766	1.71719	3.23017	25.5258	2	2	1	2	1	1	1	1	1	1	0	-0.6503	-20.65	2	0	0	1	0	0	0	0	0	0	2	2	1	1	1	0	0	0
NM_001100814	90809	C14orf9 || chromosome 14 open reading frame 9 (1)	1.79782	0.853542	0.474765	1.76751	3.23017	25.7103	2	1	1	1	1	1	0	0	0	0	0	NA	-17.02	0	0	0	0	0	0	0	0	0	0	1	1	1	1	0	0	0	0
NM_006628	10776	ARPP-19 || cyclic AMP phosphoprotein, 19 kD (2)	1.79761	0.786979	0.437793	1.70322	3.23017	25.725	3	4	2	2	1	0	0	0	0	0	1	-0.3206	-20.26	1	1	1	0	0	0	0	0	0	0	2	0	2	0	0	0	1	1
NM_006406	10549	PRDX4 || peroxiredoxin 4 (1)	1.77972	0.885333	0.497455	1.90225	4.23782	26.9686	0	0	0	0	0	0	0	0	0	0	0	NA	NA	1	0	0	1	0	NA	NA	NA	NA	NA	0	0	0	0	1	0	0	0
NM_024792	79850	FAM57A || family with sequence similarity 57, member A (1)	1.7738	0.744542	0.419743	1.75208	4.23782	27.3871	3	0	0	1	0	0	0	0	0	0	1	-0.0656	-18.2	0	0	0	0	0	NA	NA	NA	NA	NA	1	0	0	0	0	0	0	0
NM_020792	57552	AADACL1 || arylacetamide deacetylase-like 1 (1)	1.77001	0.86805	0.490421	1.78945	4.23782	27.6567	1	0	0	0	0	0	0	0	0	0	0	NA	-18.49	0	1	0	0	0	0	0	0	0	0	0	0	0	0	0	0	0	0
NM_016207	51692	CPSF3 || cleavage and polyadenylation specific factor 3, 73kDa (1)	1.75795	0.894958	0.509092	1.88798	4.23782	28.5232	0	0	0	0	0	0	0	0	0	0	0	NA	NA	3	1	1	2	1	NA	NA	NA	NA	NA	0	0	0	0	2	0	1	0
NM_001079559	221092	DKFZp762N1910 || hypothetical protein DKFZp762N1910 (1)	1.74913	0.855786	0.489265	1.75866	4.23782	29.1655	0	1	0	0	0	0	0	0	0	0	0	NA	-17.78	0	0	0	0	0	0	0	0	0	0	0	0	0	0	0	0	0	0
NA	441906	na || similar to CG31613-PA (1)	1.74461	0.936042	0.536534	1.91007	4.23782	29.4971	NA	NA	NA	NA	NA	0	0	0	0	0	0	NA	NA	NA	NA	NA	NA	NA	NA	NA	NA	NA	NA	NA	NA	NA	NA	NA	NA	NA	NA
NA	7116	TMSL2 || thymosin-like 2 (1)	1.74411	1.09329	0.626847	2.04191	4.23782	29.5337	NA	NA	NA	NA	NA	0	0	0	0	0	0	NA	NA	NA	NA	NA	NA	NA	NA	NA	NA	NA	NA	NA	NA	NA	NA	NA	NA	NA	NA
NM_145654	201299	RAD52B || RAD52 homolog B (S. cerevisiae) (1)	1.74043	0.917042	0.526905	1.92591	4.23782	29.8054	0	0	0	0	0	0	0	0	0	0	0	NA	NA	2	0	0	1	0	NA	NA	NA	NA	NA	0	0	0	0	1	0	0	0
NA	283459	15E1.2 || hypothetical protein 15E1.2 (2)	1.73206	0.977583	0.564406	1.90701	5.12623	30.428	NA	NA	NA	NA	NA	0	0	0	0	0	0	NA	NA	NA	NA	NA	NA	NA	NA	NA	NA	NA	NA	NA	NA	NA	NA	NA	NA	NA	NA
NA	389905	na || hypothetical gene supported by BC017239 (1)	1.72181	0.855167	0.496667	1.77429	5.12623	31.1977	NA	NA	NA	NA	NA	0	0	0	0	0	0	NA	NA	NA	NA	NA	NA	NA	NA	NA	NA	NA	NA	NA	NA	NA	NA	NA	NA	NA	NA
NA	7118	TMSL4 || thymosin-like 4 (1)	1.7211	1.07412	0.624091	2.08081	5.12623	31.2511	NA	NA	NA	NA	NA	0	0	0	0	0	0	NA	NA	NA	NA	NA	NA	NA	NA	NA	NA	NA	NA	NA	NA	NA	NA	NA	NA	NA	NA
NM_001636	293	SLC25A6 || solute carrier family 25 (mitochondrial carrier; adenine nucleotide translocator), member 6 (1)	1.712	0.975792	0.569973	1.89888	5.12623	31.9434	0	0	0	0	0	0	0	0	0	0	0	NA	NA	0	0	0	0	0	0	0	0	0	0	0	0	0	0	0	0	0	0
NM_001005910	51447	IHPK2 || inositol hexaphosphate kinase 2 (2)	1.70655	1.23287	0.722436	2.99413	5.12623	32.3605	1	0	0	0	0	0	0	0	1	0	0	NA	-16.65	0	0	0	0	0	0	0	0	0	0	0	0	0	0	0	0	0	0
NM_031284	83440	ADPGK || ADP-dependent glucokinase (1)	1.70637	0.620367	0.36356	1.52412	5.12623	32.3748	2	1	1	1	1	1	1	0	0	1	0	-0.3701	-25.89	0	0	0	0	0	NA	NA	NA	NA	NA	1	1	1	1	0	0	0	0
NM_004346	836	CASP3 || caspase 3, apo1osis-related cysteine protease (2)	1.68526	0.861208	0.511023	1.77209	5.12623	34.0144	0	2	0	0	0	0	0	0	0	0	0	NA	NA	0	2	0	0	0	0	0	0	0	0	0	0	0	0	0	0	0	0
NM_006837	10987	COPS5 || COP9 constitutive photomorphogenic homolog subunit 5 (Arabidopsis) (2)	1.68136	0.734208	0.436675	1.6894	5.12623	34.3217	0	0	0	0	0	0	0	0	0	0	0	NA	NA	0	0	0	0	0	0	0	0	0	0	0	0	0	0	0	0	0	0
NM_032846	84932	RAB2B || RAB2B, member RAS oncogene family (1)	1.68015	0.808808	0.481391	1.68738	5.12623	34.4172	4	1	0	1	0	0	0	0	0	0	1	-0.0633	-20.53	0	0	0	0	0	0	0	0	0	0	1	0	0	0	0	0	0	0
NM_033115	93627	MGC16169 || hypothetical protein MGC16169 (2)	1.67706	0.730625	0.435657	1.68114	5.12623	34.6611	1	0	0	0	0	0	0	0	0	0	0	NA	-19.06	4	2	2	2	1	0	0	0	0	0	0	0	0	0	2	0	2	0
NM_024667	79720	FLJ12750 || hypothetical protein FLJ12750 (2)	1.67103	0.72375	0.433117	1.61186	5.12623	35.1404	1	1	1	0	0	0	0	0	0	0	1	-0.1212	-17.28	0	0	0	0	0	0	0	0	0	0	0	0	1	0	0	0	0	0
NM_001380	1793	DOCK1 || dedicator of cytokinesis 1 (1)	1.66828	1.03442	0.620051	2.40341	5.12623	35.3599	0	1	0	0	0	0	0	0	0	0	0	NA	NA	4	2	1	1	0	0	0	0	0	0	0	0	0	0	1	0	1	0
NM_015008	23023	TMCC1 || transmembrane and coiled-coil domains 1 (1)	1.66412	0.653083	0.39245	1.61916	5.12623	35.6926	4	2	2	1	1	1	1	0	0	1	1	-0.4553	-19.94	0	0	0	0	0	0	0	0	0	0	1	1	2	1	0	0	0	0
NM_006148	3927	LASP1 || LIM and SH3 protein 1 (1)	1.66062	0.980375	0.590365	1.98	7.72132	35.973	3	3	3	2	2	1	0	0	1	1	1	-0.4772	-18.23	0	0	0	0	0	0	0	0	0	0	2	1	3	0	0	0	0	0
NM_030780	81034	MFTC || mitochondrial folate transporter/carrier (1)	1.65841	0.537292	0.32398	1.44858	7.72132	36.1513	1	0	0	1	0	0	0	0	0	0	1	-0.0818	NA	0	0	0	0	0	0	0	0	0	0	1	0	0	0	0	0	0	0
NM_015641	26136	TES || testis derived transcri1 (3 LIM domains) (1)	1.65061	0.668577	0.405048	1.5959	7.72132	36.7816	1	0	0	0	0	0	0	0	0	0	0	NA	-16.79	1	1	1	0	0	0	0	0	0	0	0	0	0	0	0	0	1	0
NM_001033030	55179	FAIM || Fas apo1otic inhibitory molecule (1)	1.64542	1.10271	0.670167	1.99645	7.72132	37.2038	1	1	1	1	1	0	0	1	0	0	1	-0.4754	NA	0	1	0	0	0	0	0	0	0	0	1	0	1	0	0	0	0	0
NM_015529	26002	MOXD1 || monooxygenase, DBH-like 1 (1)	1.64169	0.649958	0.395908	1.58608	7.72132	37.5085	1	1	0	1	0	0	0	0	0	0	1	-0.1269	-18.05	1	0	0	0	0	0	0	0	0	0	1	0	0	0	0	0	0	0
NM_002074	2782	GNB1 || guanine nucleotide binding protein (G protein), beta polype1ide 1 (2)	1.64008	0.7455	0.454551	1.64521	7.72132	37.6403	3	1	0	1	0	1	0	0	0	1	0	-0.1068	NA	0	0	0	0	0	0	1	0	0	0	1	1	0	0	0	0	0	0
NM_178122	90529	LOC90529 || hypothetical protein LOC90529 (1)	1.63271	0.73725	0.451549	1.63429	7.72132	38.2457	3	2	1	0	0	0	0	0	0	0	1	-0.0426	-22.83	0	0	0	0	0	0	0	0	0	0	0	0	1	0	0	0	0	0
NA	388476	na || hypothetical LOC388476 (1)	1.6256	0.955583	0.587834	1.83041	7.72132	38.8333	NA	NA	NA	NA	NA	0	0	0	0	0	0	NA	NA	NA	NA	NA	NA	NA	NA	NA	NA	NA	NA	NA	NA	NA	NA	NA	NA	NA	NA
NM_152350	125144	MGC40157 || hypothetical protein MGC40157 (2)	1.62319	0.7935	0.488851	1.70366	7.72132	39.0331	0	1	0	0	0	0	0	0	0	0	0	NA	-20.93	0	0	0	0	0	0	0	0	0	0	0	0	0	0	0	0	0	0
NM_002266	3838	KPNA2 || karyopherin alpha 2 (RAG cohort 1, importin alpha 1) (1)	1.62068	0.73875	0.455826	1.64049	7.72132	39.2418	0	1	0	0	0	0	0	0	0	0	0	NA	NA	1	1	0	0	0	0	0	0	0	0	0	0	0	0	0	0	0	0
NM_016004	51098	C20orf9 || chromosome 20 open reading frame 9 (1)	1.62031	0.684125	0.422219	1.58608	7.72132	39.273	1	1	1	1	1	0	0	0	0	0	1	-0.5496	-19.84	1	0	0	1	0	0	0	0	0	0	1	0	1	0	1	1	0	0
NA	391717	na || similar to Ras-related nuclear protein (1)	1.61011	0.627422	0.389678	1.56003	7.72132	40.1259	NA	NA	NA	NA	NA	0	0	0	0	0	0	NA	NA	NA	NA	NA	NA	NA	NA	NA	NA	NA	NA	NA	NA	NA	NA	NA	NA	NA	NA
NM_014463	27258	LSM3 || LSM3 homolog, U6 small nuclear RNA associated (S. cerevisiae) (2)	1.60367	0.999125	0.623023	1.85055	7.72132	40.6672	0	1	0	0	0	0	0	0	0	0	0	NA	NA	0	0	0	0	0	NA	NA	NA	NA	NA	0	0	0	0	0	0	0	0
NM_006196	5093	PCBP1 || poly(rC) binding protein 1 (1)	1.60152	0.610571	0.381244	1.5369	7.72132	40.8486	0	1	0	0	0	0	0	0	0	0	0	NA	-17.79	2	0	0	1	0	0	0	0	0	0	0	0	0	0	1	1	0	0
NM_057161	116138	KLHDC3 || kelch domain containing 3 (1)	1.60133	0.706435	0.441154	1.59597	7.72132	40.8646	0	0	0	0	0	0	0	0	0	0	0	NA	NA	1	2	0	1	0	0	0	0	0	0	0	0	0	0	1	1	0	0
NM_201397	2876	GPX1 || glutathione peroxidase 1 (3)	1.59974	0.873083	0.545765	1.94467	7.72132	40.9992	0	0	0	0	0	0	0	0	0	0	0	NA	NA	0	0	0	0	0	0	0	0	0	0	0	0	0	0	0	0	0	0
NM_016271	51444	RNF138 || ring finger protein 138 (6)	1.59824	0.845625	0.529097	1.74866	7.72132	41.126	2	1	1	1	1	1	0	0	1	1	0	-0.2335	-20.95	1	0	0	1	0	0	0	0	0	0	1	1	1	1	1	1	0	0
NM_005037	5468	PPARG || peroxisome proliferative activated rece1or, gamma (3)	1.59704	0.703625	0.440582	1.59878	7.72132	41.2282	0	0	0	0	0	0	0	0	0	0	0	NA	-16.94	2	2	1	1	1	0	0	0	0	0	0	0	0	0	1	0	1	0
NM_032558	84641	FLJ14753 || hypothetical protein FLJ14753 (1)	1.59668	0.681208	0.42664	1.57674	7.72132	41.2583	0	1	0	0	0	0	0	0	0	0	0	NA	-23.92	2	1	1	0	0	0	0	0	0	0	0	0	0	0	0	0	1	0
NM_199336	151313	DKFZp434N062 || hypothetical protein DKFZp434N062 (2)	1.59368	0.663292	0.4162	1.56439	7.72132	41.5128	0	0	0	0	0	0	0	0	0	0	0	NA	NA	0	0	0	0	0	0	0	0	0	0	0	0	0	0	0	0	0	0
NM_000274	4942	OAT || ornithine aminotransferase (gyrate atrophy) (1)	1.59274	1.07912	0.677528	2.56846	7.72132	41.5931	2	2	2	1	1	0	0	0	1	0	1	-0.6374	-18.03	1	0	0	0	0	NA	NA	NA	NA	NA	1	0	2	0	0	0	0	0
NA	440037	na || similar to Protein transport protein SEC61 beta subunit (1)	1.5874	0.725458	0.457012	1.67749	7.72132	42.0483	NA	NA	NA	NA	NA	0	0	0	0	0	0	NA	NA	NA	NA	NA	NA	NA	NA	NA	NA	NA	NA	NA	NA	NA	NA	NA	NA	NA	NA
NM_020744	57504	MTA3 || metastasis associated 1 family, member 3 (2)	1.58555	0.686979	0.433275	1.6162	7.72132	42.206	0	0	0	0	0	0	0	0	0	0	0	NA	NA	1	2	1	1	1	0	0	0	0	0	0	0	0	0	1	1	1	1
NM_006003	7386	UQCRFS1 || ubiquinol-cytochrome c reductase, Rieske iron-sulfur polype1ide 1 (2)	1.58245	0.787088	0.497387	1.71247	7.72132	42.4715	0	0	0	0	0	0	0	0	0	0	0	NA	NA	0	0	0	0	0	0	0	0	0	0	0	0	0	0	0	0	0	0
NA	283852	LOC283852 || hypothetical protein LOC283852 (1)	1.57778	0.649958	0.411944	1.62861	10.5427	42.8714	NA	NA	NA	NA	NA	0	0	0	0	0	0	NA	NA	NA	NA	NA	NA	NA	NA	NA	NA	NA	NA	NA	NA	NA	NA	NA	NA	NA	NA
NM_032565	84650	EBPL || emopamil binding protein-like (3)	1.57708	1.02558	0.650306	1.97354	10.5427	42.9321	1	1	1	1	1	0	0	0	0	0	1	-0.4817	-19.65	0	0	0	0	0	0	0	0	0	0	1	0	1	0	0	0	0	0
NM_018092	81831	NETO2 || neuropilin (NRP) and tolloid (TLL)-like 2 (1)	1.57437	0.679417	0.431549	1.6172	10.5427	43.1653	2	2	1	1	0	0	0	0	1	0	1	-0.4455	-30.6	1	0	0	1	0	0	0	0	0	0	1	0	1	0	1	0	0	0
NM_080743	135295	SRrp35 || serine-arginine repressor protein (35 kDa) (1)	1.57221	1.07662	0.684783	2.60191	10.5427	43.3511	0	2	0	0	0	0	0	0	0	0	0	NA	-19.61	2	3	2	2	2	0	0	0	0	0	0	0	0	0	2	0	2	0
NA	387805	na || similar to ARP2/3 complex 21 kDa subunit (p21-ARC) (Actin-related protein 2/3 complex subunit 3) (1)	1.56282	1.23729	0.791703	2.10471	10.5427	44.1636	NA	NA	NA	NA	NA	0	0	0	0	0	0	NA	NA	NA	NA	NA	NA	NA	NA	NA	NA	NA	NA	NA	NA	NA	NA	NA	NA	NA	NA
NM_006742	5681	PSKH1 || protein serine kinase H1 (1)	1.55541	0.751417	0.483098	1.67877	10.5427	44.8082	3	1	1	2	0	0	0	0	0	0	1	-0.1325	-19.52	0	0	0	0	0	0	0	0	0	0	2	0	1	0	0	0	0	0
NM_019101	55937	APOM || apolipoprotein M (1)	1.55451	0.722565	0.464817	1.61926	10.5427	44.8867	0	0	0	0	0	0	0	0	0	0	0	NA	NA	0	0	0	0	0	0	0	0	0	0	0	0	0	0	0	0	0	0
NM_001080420	85358	SHANK3 || SH3 and multiple ankyrin repeat domains 3 (1)	1.55048	1.49637	0.965101	5.79807	10.5427	45.2392	0	0	0	0	0	0	0	0	0	0	0	NA	NA	0	0	0	0	0	NA	NA	NA	NA	NA	0	0	0	0	0	0	0	0
NM_004814	9410	WDR57 || WD repeat domain 57 (U5 snRNP specific) (2)	1.54778	0.677292	0.437589	1.58124	10.5427	45.4757	0	0	0	0	0	0	0	0	0	0	0	NA	NA	0	0	0	0	0	NA	NA	NA	NA	NA	0	0	0	0	0	0	0	0
NM_020960	57720	GPR107 || G protein-coupled rece1or 107 (2)	1.54146	0.647342	0.419955	1.57224	10.5427	46.0308	1	0	0	1	0	0	0	0	0	0	1	0.0976	-17.81	2	1	0	2	0	0	0	0	0	0	1	0	0	0	2	0	0	0
NM_004907	9592	IER2 || immediate early response 2 (1)	1.53438	0.857867	0.559098	1.70994	10.5427	46.6549	0	1	0	0	0	0	0	0	0	0	0	NA	-17.51	0	0	0	0	0	0	0	0	0	0	0	0	0	0	0	0	0	0
NA	7120	TMSL6 || thymosin-like 6 (1)	1.52648	1.02975	0.674591	2.21203	10.5427	47.3539	NA	NA	NA	NA	NA	0	0	0	0	0	0	NA	NA	NA	NA	NA	NA	NA	NA	NA	NA	NA	NA	NA	NA	NA	NA	NA	NA	NA	NA
NM_002857	5824	PEX19 || peroxisomal biogenesis factor 19 (2)	1.52541	0.494333	0.324065	1.4143	10.5427	47.4485	1	1	0	0	0	0	0	0	0	0	0	NA	-18.56	0	0	0	0	0	NA	NA	NA	NA	NA	0	0	0	0	0	0	0	0
NM_001098634	54502	FLJ20273 || RNA-binding protein (1)	1.52467	1.01861	0.668083	1.8846	10.5427	47.5146	2	2	1	1	0	0	0	0	1	0	0	NA	NA	1	0	0	0	0	0	0	0	0	0	1	0	1	0	0	0	0	0
NM_001032296	8428	STK24 || serine/threonine kinase 24 (STE20 homolog, yeast) (1)	1.52056	0.715792	0.470741	1.64751	10.5427	47.8799	0	1	0	0	0	0	0	0	0	0	0	NA	-19.33	2	1	0	1	0	0	0	0	0	0	0	0	0	0	1	0	0	0
NM_018715	55920	TD-60 || RCC1-like (2)	1.51149	0.520833	0.344582	1.43535	10.5427	48.6893	1	0	0	0	0	0	0	0	0	0	0	NA	NA	0	0	0	0	0	0	0	0	0	0	0	0	0	0	0	0	0	0
NM_177966	201626	2'-PDE || 2'-phosphodiesterase (1)	1.51132	0.816208	0.540064	1.69988	10.5427	48.705	1	1	1	1	1	0	0	0	0	0	1	-0.3156	-22.79	1	0	0	1	0	0	0	0	0	0	1	0	1	0	1	0	0	0
NM_032016	83930	STARD3NL || STARD3 N-terminal like (2)	1.50859	0.607458	0.402666	1.50392	10.5427	48.9491	0	0	0	0	0	0	0	0	0	0	0	NA	-23.03	1	0	0	1	0	0	0	0	0	0	0	0	0	0	1	1	0	0
NM_023016	65124	C2orf26 || chromosome 2 open reading frame 26 (1)	1.50794	0.83175	0.551579	1.90266	10.5427	49.0069	4	2	1	0	0	0	0	0	0	0	1	-0.3499	-25.01	0	0	0	0	0	0	0	0	0	0	0	0	1	0	0	0	0	0
NM_006818	10962	MLLT11 || myeloid/lymphoid or mixed-lineage leukemia (trithorax homolog, Drosophila); translocated to, 11 (1)	1.50701	0.817667	0.542576	1.88687	10.5427	49.091	1	1	0	0	0	0	0	0	0	0	0	NA	-20.99	0	0	0	0	0	0	0	0	0	0	0	0	0	0	0	0	0	0
NA	54984	PINX1 || PIN2-interacting protein 1 (1)	1.50597	0.734304	0.487596	1.62035	10.5427	49.1842	NA	NA	NA	NA	NA	0	0	0	0	0	0	NA	NA	NA	NA	NA	NA	NA	NA	NA	NA	NA	NA	NA	NA	NA	NA	NA	NA	NA	NA
NM_031286	83442	SH3BGRL3 || SH3 domain binding glutamic acid-rich protein like 3 (1)	1.49965	0.767852	0.51202	1.70731	13.46	49.7517	2	1	1	0	0	1	0	0	0	1	0	-0.2181	-20.91	0	0	0	0	0	0	0	0	0	0	0	0	1	1	0	0	0	0
NM_006476	10632	ATP5L || ATP synthase, H+ transporting, mitochondrial F0 complex, subunit g (3)	1.49831	0.837125	0.558711	1.82419	13.46	49.8722	0	0	0	0	0	0	0	0	0	0	0	NA	-16.76	0	0	0	0	0	1	1	0	1	0	0	0	0	0	0	0	0	0
NM_018718	95681	1GA14 || testis specific, 14 (1)	1.49824	0.607685	0.405598	1.54487	13.46	49.8785	1	3	0	1	0	0	0	0	0	0	1	-0.1031	-17.8	0	0	0	0	0	NA	NA	NA	NA	NA	1	0	0	0	0	0	0	0
NM_003348	7334	UBE2N || ubiquitin-conjugating enzyme E2N (UBC13 homolog, yeast) (2)	1.49391	0.639125	0.427821	1.54047	13.46	50.2695	0	1	0	0	0	0	0	0	0	0	0	NA	-17.78	0	0	0	0	0	0	0	0	0	0	0	0	0	0	0	0	0	0
NA	440085	na || similar to prothymosin alpha (1)	1.49384	0.900625	0.602891	1.84911	13.46	50.2752	NA	NA	NA	NA	NA	0	0	0	0	0	0	NA	NA	NA	NA	NA	NA	NA	NA	NA	NA	NA	NA	NA	NA	NA	NA	NA	NA	NA	NA
NA	30814	PLA2G2E || phospholipase A2, group IIE (1)	1.48858	0.518592	0.348381	1.43002	13.46	50.7511	NA	NA	NA	NA	NA	0	0	0	0	0	0	NA	NA	NA	NA	NA	NA	NA	NA	NA	NA	NA	NA	NA	NA	NA	NA	NA	NA	NA	NA
NM_001166	329	BIRC2 || baculoviral IAP repeat-containing 2 (1)	1.48715	0.572292	0.384824	1.48045	13.46	50.8803	0	1	0	0	0	0	0	0	0	0	0	NA	NA	0	1	0	0	0	0	0	0	0	0	0	0	0	0	0	0	0	0
NM_198976	51497	TH1L || TH1-like (Drosophila) (2)	1.48516	0.836458	0.563212	1.92766	13.46	51.061	1	1	1	1	1	0	0	0	1	0	1	-0.3672	-16.91	0	0	0	0	0	NA	NA	NA	NA	NA	1	0	1	0	0	0	0	0
NM_015488	25953	1-1 || myofibrillogenesis regulator 1 (2)	1.482	0.741729	0.500491	1.66261	13.46	51.3471	1	0	0	0	0	0	0	0	0	0	0	NA	-16.99	1	1	1	0	0	0	0	0	0	0	0	0	0	0	0	0	1	0
NM_080652	90407	TMEM41A || transmembrane protein 41A (2)	1.47861	0.951875	0.643764	1.83893	13.46	51.6552	0	0	0	0	0	0	0	0	0	0	0	NA	NA	1	1	1	0	0	0	0	0	0	0	0	0	0	0	0	0	1	0
NM_014044	25972	UNC50 || unc-50 homolog (C. elegans) (1)	1.47762	0.69892	0.473004	1.65198	13.46	51.7451	1	1	1	0	0	0	0	0	0	0	1	-0.2783	-18.87	0	0	0	0	0	0	0	0	0	0	0	0	1	0	0	0	0	0
NM_004643	8106	PABPN1 || poly(A) binding protein, nuclear 1 (1)	1.47084	0.729125	0.495719	1.60164	13.46	52.3623	0	0	0	0	0	0	0	0	0	0	0	NA	NA	0	0	0	0	0	0	0	0	0	0	0	0	0	0	0	0	0	0
NM_018138	55171	FLJ10560 || hypothetical protein FLJ10560 (1)	1.46974	0.528521	0.359603	1.45127	13.46	52.4636	1	0	0	1	0	0	0	0	0	0	1	-0.2348	-20.13	0	1	0	0	0	0	0	0	0	0	1	0	0	0	0	0	0	0
NM_013267	27165	GLS2 || glutaminase 2 (liver, mitochondrial) (1)	1.46879	0.610292	0.415505	1.57527	13.46	52.5495	1	0	0	0	0	0	0	0	0	0	0	NA	-17.19	5	2	2	1	1	0	1	0	0	0	0	0	0	0	0	0	1	0
NM_018413	50515	CHST11 || carbohydrate (chondroitin 4) sulfotransferase 11 (1)	1.4687	0.749158	0.510083	1.68055	13.46	52.5582	1	0	0	1	0	0	0	0	1	0	1	-0.1933	-21.75	0	0	0	0	0	0	0	0	0	0	1	0	0	0	0	0	0	0
NM_020150	56681	SARA1 || SAR1a gene homolog 1 (S. cerevisiae) (1)	1.46503	0.545708	0.372491	1.46578	13.46	52.8938	2	0	0	1	0	0	0	0	0	0	1	-0.1178	-17.45	0	0	0	0	0	0	0	0	0	0	1	0	0	0	0	0	0	0
NM_000344	6606	SMN1 || survival of motor neuron 1, telomeric (2)	1.4649	0.73975	0.504984	1.62456	13.46	52.9054	0	0	0	0	0	0	0	0	0	0	0	NA	NA	1	1	1	0	0	0	0	0	0	0	NA	NA	NA	NA	NA	NA	NA	NA
NM_203467	122769	PPIL5 || pe1idylprolyl isomerase (cyclophilin)-like 5 (4)	1.46371	0.747208	0.510489	1.71757	13.46	53.014	0	0	0	0	0	0	0	0	0	0	0	NA	NA	1	0	0	1	0	0	0	0	0	0	0	0	0	0	1	0	0	0
NM_024312	79158	MGC4170 || MGC4170 protein (1)	1.46162	0.615579	0.421162	1.60423	13.46	53.2055	1	1	0	1	0	0	0	0	0	1	0	-0.1275	-21.26	0	2	0	0	0	0	0	0	0	0	1	1	0	0	0	0	0	0
NM_004394	1611	DAP || death-associated protein (1)	1.45909	0.788017	0.540072	1.64004	13.46	53.4369	1	1	1	1	1	0	0	0	0	0	1	-0.1893	-19.22	0	0	0	0	0	0	0	0	0	0	1	0	1	0	0	0	0	0
NA	203260	MGC31967 || hypothetical protein MGC31967 (1)	1.45736	1.05408	0.723285	2.0479	13.46	53.5964	NA	NA	NA	NA	NA	0	0	0	0	0	0	NA	NA	NA	NA	NA	NA	NA	NA	NA	NA	NA	NA	NA	NA	NA	NA	NA	NA	NA	NA
NM_139239	84807	TA-NFKBH || T-cell activation NFKB-like protein (1)	1.45116	0.661208	0.455643	1.5875	13.46	54.1659	0	0	0	0	0	0	0	0	0	0	0	NA	NA	0	1	0	0	0	0	0	0	0	0	0	0	0	0	0	0	0	0
NM_018275	55262	FLJ10925 || hypothetical protein FLJ10925 (1)	1.44827	0.66925	0.462103	1.56219	13.46	54.4314	2	1	1	0	0	0	0	0	0	0	1	-0.0814	-19.65	1	1	1	0	0	0	0	0	0	0	0	0	1	0	0	0	1	0
NM_006513	6301	SARS || seryl-tRNA synthetase (3)	1.44436	0.7285	0.504377	1.62738	13.46	54.792	1	1	1	0	0	0	0	0	0	0	1	NA	NA	1	1	1	0	0	0	0	0	0	0	0	0	1	0	0	0	1	0
NM_021154	29968	PSAT1 || phosphoserine aminotransferase 1 (3)	1.44295	0.513875	0.356127	1.4171	13.46	54.9212	1	0	0	1	0	0	0	0	0	0	1	-0.1343	-20.27	0	0	0	0	0	0	0	0	0	0	1	0	0	0	0	0	0	0
NA	126170	na || similar to pe1idyl-Pro cis trans isomerase (1)	1.4406	0.47	0.326252	1.38377	13.46	55.1382	NA	NA	NA	NA	NA	0	0	0	0	0	0	NA	NA	NA	NA	NA	NA	NA	NA	NA	NA	NA	NA	NA	NA	NA	NA	NA	NA	NA	NA
NM_016494	51255	LOC51255 || hypothetical protein LOC51255 (4)	1.43873	0.679125	0.472032	1.57678	13.46	55.3115	0	0	0	0	0	0	0	0	0	0	0	NA	NA	1	0	0	1	0	0	0	0	0	0	0	0	0	0	1	1	0	0
NM_006698	10904	BLCAP || bladder cancer associated protein (1)	1.43505	0.5585	0.389186	1.47868	13.46	55.6518	1	1	1	0	0	1	0	0	1	1	0	-0.0684	-17.8	0	0	0	0	0	0	0	0	0	0	0	0	1	1	0	0	0	0
NM_153034	118738	ZNF488 || zinc finger protein 488 (1)	1.43403	0.585667	0.408405	1.53723	13.46	55.7455	2	1	1	1	1	0	0	0	0	0	1	-0.1322	-20.2	0	1	0	0	0	0	0	0	0	0	NA	NA	NA	NA	0	0	0	0
NM_145029	221545	C6orf136 || chromosome 6 open reading frame 136 (1)	1.43054	0.495583	0.34643	1.407	13.46	56.0687	0	0	0	0	0	0	0	0	0	0	0	NA	NA	0	1	0	0	0	1	0	0	0	0	0	0	0	0	0	0	0	0
NM_001760	896	CCND3 || cyclin D3 (1)	1.43017	0.713125	0.498631	1.59251	17.3408	56.1036	1	0	0	0	0	0	0	0	0	0	0	NA	-18.66	0	0	0	0	0	0	0	0	0	0	0	0	0	0	0	0	0	0
NM_024506	79411	GLB1L || galactosidase, beta 1-like (1)	1.42609	0.599333	0.420264	1.54377	17.3408	56.4817	0	0	0	0	0	0	0	0	0	0	0	NA	NA	0	1	0	0	0	0	0	0	0	0	0	0	0	0	0	0	0	0
NA	392501	na || similar to 60S ribosomal protein L26 (1)	1.42552	0.816083	0.572481	1.67604	17.3408	56.5344	NA	NA	NA	NA	NA	0	0	0	0	0	0	NA	NA	NA	NA	NA	NA	NA	NA	NA	NA	NA	NA	NA	NA	NA	NA	NA	NA	NA	NA
NM_006993	10360	NPM3 || nucleophosmin/nucleoplasmin, 3 (1)	1.42465	0.657667	0.461633	1.5394	17.3408	56.6147	0	0	0	0	0	0	0	0	0	0	0	NA	NA	0	0	0	0	0	NA	NA	NA	NA	NA	0	0	0	0	0	0	0	0
NA	202227	na || similar to pe1idyl-Pro cis trans isomerase (1)	1.41982	0.638129	0.449443	1.58985	17.3408	57.0632	NA	NA	NA	NA	NA	0	0	0	0	0	0	NA	NA	NA	NA	NA	NA	NA	NA	NA	NA	NA	NA	NA	NA	NA	NA	NA	NA	NA	NA
NM_153251	253832	ZDHHC20 || zinc finger, DHHC domain containing 20 (1)	1.41909	0.580792	0.40927	1.50368	17.3408	57.1313	0	0	0	0	0	0	0	0	0	0	0	NA	NA	1	0	0	0	0	0	0	0	0	0	0	0	0	0	0	0	0	0
NA	387590	psiT1E22 || T1E pseudogene (1)	1.41766	0.731208	0.515784	1.62867	17.3408	57.2639	NA	NA	NA	NA	NA	0	0	0	0	0	0	NA	NA	NA	NA	NA	NA	NA	NA	NA	NA	NA	NA	NA	NA	NA	NA	NA	NA	NA	NA
NA	285708	LOC285708 || hypothetical protein LOC285708 (1)	1.41704	0.550175	0.388256	1.45292	17.3408	57.322	NA	NA	NA	NA	NA	0	0	0	0	0	0	NA	NA	NA	NA	NA	NA	NA	NA	NA	NA	NA	NA	NA	NA	NA	NA	NA	NA	NA	NA
NM_001042678	389	RHOC || ras homolog gene family, member C (1)	1.41639	0.672917	0.475092	1.57	17.3408	57.3823	0	0	0	0	0	0	0	0	0	0	0	NA	NA	1	1	1	0	0	0	0	0	0	0	0	0	0	0	0	0	1	1
NM_018266	55254	TMEM39A || transmembrane protein 39A (1)	1.41534	0.755313	0.533662	1.63855	17.3408	57.4803	0	1	0	0	0	0	0	0	0	0	0	NA	NA	0	0	0	0	0	0	0	0	0	0	0	0	0	0	0	0	0	0
NM_001025079	961	CD47 || CD47 antigen (Rh-related antigen, integrin-associated signal transducer) (2)	1.41356	0.632458	0.447421	1.56304	17.3408	57.6455	3	3	1	0	0	0	0	0	0	0	0	NA	-21.5	1	0	0	1	0	0	0	0	0	0	0	0	1	0	1	0	0	0
NM_015966	51614	SDBCAG84 || serologically defined breast cancer antigen 84 (1)	1.41284	0.425833	0.301402	1.34087	17.3408	57.7125	0	0	0	0	0	0	0	0	0	0	0	NA	NA	0	0	0	0	0	0	0	0	0	0	0	0	0	0	0	0	0	0
NM_001099627	56181	FAM54B || family with sequence similarity 54, member B (1)	1.40314	0.630667	0.449467	1.64637	17.3408	58.6166	0	0	0	0	0	0	0	0	0	0	0	NA	NA	0	0	0	0	0	0	0	0	0	0	0	0	0	0	0	0	0	0
NA	286161	LOC286161 || hypothetical protein LOC286161 (1)	1.4008	0.574792	0.41033	1.48483	17.3408	58.835	NA	NA	NA	NA	NA	0	0	0	0	0	0	NA	NA	NA	NA	NA	NA	NA	NA	NA	NA	NA	NA	NA	NA	NA	NA	NA	NA	NA	NA
NM_024675	79728	FLJ21816 || hypothetical protein FLJ21816 (1)	1.39837	0.543917	0.388963	1.47084	17.3408	59.0619	0	1	0	0	0	0	0	1	0	0	0	NA	NA	3	4	3	0	0	1	0	0	0	0	0	0	0	0	0	0	3	0
NM_006016	8763	CD164 || CD164 antigen, sialomucin (1)	1.39636	0.523946	0.375221	1.47038	17.3408	59.2497	2	2	1	1	1	0	0	0	0	0	1	-0.3657	-21.19	0	0	0	0	0	0	0	0	0	0	1	0	1	0	0	0	0	0
NM_015318	23370	ARHGEF18 || rho/rac guanine nucleotide exchange factor (GEF) 18 (1)	1.3959	0.720062	0.51584	1.58622	17.3408	59.2929	3	3	3	0	0	1	0	0	1	1	1	-0.2686	-19.95	1	1	1	0	0	0	0	0	0	0	0	0	3	1	0	0	1	0
NM_002966	6281	S100A10 || S100 calcium binding protein A10 (annexin II ligand, calpactin I, light polype1ide (p11)) (1)	1.39579	0.622917	0.446284	1.54508	17.3408	59.3039	0	0	0	0	0	0	0	0	0	0	0	NA	NA	0	0	0	0	0	0	0	0	0	0	0	0	0	0	0	0	0	0
NM_002795	5691	PSMB3 || proteasome (prosome, macropain) subunit, beta type, 3 (2)	1.39543	0.536913	0.384766	1.43398	17.3408	59.3373	0	0	0	0	0	0	0	0	0	0	0	NA	NA	0	0	0	0	0	0	0	0	0	0	0	0	0	0	0	0	0	0
NM_001222	818	CAMK2G || calcium/calmodulin-dependent protein kinase (CaM kinase) II gamma (2)	1.39281	0.582458	0.41819	1.49134	17.3408	59.5823	1	0	0	1	0	0	0	0	0	0	1	-0.0157	-16.78	0	0	0	0	0	0	0	0	0	0	1	0	0	0	0	0	0	0
NM_019594	56262	LRRC8 || leucine rich repeat containing 8 (1)	1.39186	0.516833	0.371327	1.43098	17.3408	59.6713	1	1	1	0	0	1	0	0	0	1	0	-0.2921	-23.72	0	0	0	0	0	0	0	0	0	0	0	0	1	1	0	0	0	0
NM_006743	5935	RBM3 || RNA binding motif (RNP1, RRM) protein 3 (3)	1.38799	0.791583	0.570309	1.74334	17.3408	60.033	0	0	0	0	0	0	0	0	0	0	0	NA	NA	0	0	0	0	0	0	0	0	0	0	0	0	0	0	0	0	0	0
NA	442133	na || similar to Intersectin 1 (SH3 domain-containing protein 1A) (SH3P17) (1)	1.38017	0.697458	0.505344	1.55448	17.3408	60.7658	NA	NA	NA	NA	NA	0	0	0	0	0	0	NA	NA	NA	NA	NA	NA	NA	NA	NA	NA	NA	NA	NA	NA	NA	NA	NA	NA	NA	NA
NA	400452	na || similar to High-mobility group nucleosome binding domain 1 (1)	1.37831	0.779837	0.565792	1.78882	17.3408	60.9396	NA	NA	NA	NA	NA	0	0	0	0	0	0	NA	NA	NA	NA	NA	NA	NA	NA	NA	NA	NA	NA	NA	NA	NA	NA	NA	NA	NA	NA
NA	389308	na || similar to ribosomal protein L10a (1)	1.37769	0.595167	0.432004	1.48398	17.3408	60.9981	NA	NA	NA	NA	NA	0	0	0	0	0	0	NA	NA	NA	NA	NA	NA	NA	NA	NA	NA	NA	NA	NA	NA	NA	NA	NA	NA	NA	NA
NM_005318	3005	H1F0 || H1 histone family, member 0 (1)	1.37737	0.560792	0.407148	1.46221	17.3408	61.0282	0	0	0	0	0	0	0	0	0	0	0	NA	NA	0	0	0	0	0	1	0	0	0	0	0	0	0	0	0	0	0	0
NM_001008540	7852	CXCR4 || chemokine (C-X-C motif) rece1or 4 (1)	1.37598	0.763354	0.554772	1.61179	17.3408	61.1584	2	1	1	1	1	0	0	0	0	0	1	-0.3451	-17.99	1	1	0	0	0	0	0	0	0	0	1	0	1	0	0	0	0	0
NA	81892	C14orf156 || chromosome 14 open reading frame 156 (2)	1.37461	0.788167	0.573376	1.64492	17.3408	61.2869	NA	NA	NA	NA	NA	0	0	0	0	0	0	NA	NA	NA	NA	NA	NA	NA	NA	NA	NA	NA	NA	NA	NA	NA	NA	NA	NA	NA	NA
NM_013240	29104	C21orf127 || chromosome 21 open reading frame 127 (3)	1.37247	0.5204	0.37917	1.43664	17.3408	61.4872	2	1	1	0	0	0	0	0	0	0	1	-0.1862	-17.13	1	1	0	0	0	NA	NA	NA	NA	NA	0	0	1	0	0	0	0	0
NM_001098426	6603	SMARCD2 || SWI/SNF related, matrix associated, actin dependent regulator of chromatin, subfamily d, member 2 (2)	1.3718	0.720042	0.52489	1.59573	17.3408	61.5506	1	0	0	0	0	0	0	0	0	0	0	NA	-19.18	1	0	0	0	0	0	0	0	0	0	0	0	0	0	0	0	0	0
NM_020342	57181	SLC39A10 || solute carrier family 39 (zinc transporter), member 10 (1)	1.3703	0.524073	0.382453	1.43027	17.3408	61.6915	3	1	1	2	0	1	0	0	0	1	1	-0.4289	-21.74	3	2	1	0	0	0	0	0	0	0	2	1	1	1	0	0	1	0
NM_006041	9953	HS3ST3B1 || heparan sulfate (glucosamine) 3-O-sulfotransferase 3B1 (1)	1.36114	0.548875	0.403247	1.46623	17.3408	62.5512	2	1	1	2	1	1	1	0	0	1	1	-0.5123	-20.41	0	0	0	0	0	0	0	0	0	0	2	1	1	1	0	0	0	0
NM_005669	7905	C5orf18 || chromosome 5 open reading frame 18 (1)	1.36006	0.542279	0.398718	1.47866	17.3408	62.6528	0	0	0	0	0	0	0	0	0	0	0	NA	NA	0	0	0	0	0	0	0	0	0	0	0	0	0	0	0	0	0	0
NM_016118	51667	NYREN18 || NEDD8 ultimate buster-1 (1)	1.35835	0.619542	0.4561	1.52883	21.3555	62.8134	1	0	0	0	0	0	0	0	0	0	0	NA	-18.37	1	1	1	1	1	0	0	0	0	0	0	0	0	0	1	0	1	0
NM_018198	55735	DNAJC11 || DnaJ (Hsp40) homolog, subfamily C, member 11 (2)	1.35771	0.975458	0.718459	1.74755	21.3555	62.8733	1	1	0	1	0	0	0	0	0	0	1	0.0634	-17.33	0	0	0	0	0	NA	NA	NA	NA	NA	1	0	0	0	0	0	0	0
NM_016166	8554	PIAS1 || protein inhibitor of activated STAT, 1 (1)	1.35639	0.64375	0.474606	1.50632	21.3555	62.9974	0	0	0	0	0	0	0	0	0	0	0	NA	NA	1	2	0	1	0	0	0	0	0	0	0	0	0	0	1	1	0	0
NM_030790	81533	CDA08 || T-cell immunomodulatory protein (1)	1.35563	0.738243	0.544577	1.65873	21.3555	63.0689	0	0	0	0	0	0	0	0	0	0	0	NA	NA	2	1	0	2	0	0	0	0	0	0	0	0	0	0	2	1	0	0
NM_138701	136647	C7orf11 || chromosome 7 open reading frame 11 (1)	1.35173	0.662875	0.490392	1.66759	21.3555	63.4356	1	1	1	0	0	0	0	0	0	0	1	-0.3171	-21.17	0	1	0	0	0	0	0	0	0	0	0	0	1	0	0	0	0	0
NA	6181	RPLP2 || ribosomal protein, large P2 (3)	1.34961	0.899333	0.666363	2.22862	21.3555	63.6341	NA	NA	NA	NA	NA	0	0	0	0	0	0	NA	NA	NA	NA	NA	NA	NA	NA	NA	NA	NA	NA	NA	NA	NA	NA	NA	NA	NA	NA
NM_003025	6455	SH3GL1 || SH3-domain GRB2-like 1 (1)	1.34846	0.917333	0.68028	1.73136	21.3555	63.7423	2	2	1	1	0	0	0	0	0	0	1	-0.0463	-17.33	0	0	0	0	0	0	0	0	0	0	1	0	1	0	0	0	0	0
NM_015443	284058	LOC284058 || hypothetical protein LOC284058 (1)	1.34737	0.685371	0.508674	1.74157	21.3555	63.8453	0	0	0	0	0	0	0	0	0	0	0	NA	NA	1	2	1	1	1	0	0	0	0	0	0	0	0	0	1	0	1	0
NA	283927	NUDT7 || nudix (nucleoside diphosphate linked moiety X)-type motif 7 (1)	1.34674	0.695438	0.516387	1.7673	21.3555	63.9046	NA	NA	NA	NA	NA	0	0	0	0	0	0	NA	NA	NA	NA	NA	NA	NA	NA	NA	NA	NA	NA	NA	NA	NA	NA	NA	NA	NA	NA
NM_024569	9019	MPZL1 || myelin protein zero-like 1 (2)	1.34476	0.643	0.478152	1.53357	21.3555	64.0904	1	1	1	0	0	0	0	0	0	0	1	-0.2796	-19.03	0	0	0	0	0	0	0	0	0	0	0	0	1	0	0	0	0	0
NM_198401	157567	LOC157567 || hypothetical protein LOC157567 (2)	1.34027	0.65625	0.489642	1.60642	21.3555	64.5132	0	0	0	0	0	0	0	0	0	0	0	NA	NA	0	0	0	0	0	0	0	0	0	0	0	0	0	0	0	0	0	0
NM_018056	55116	TMEM39B || transmembrane protein 39B (1)	1.33976	0.647667	0.483421	1.53762	21.3555	64.561	0	0	0	0	0	0	0	0	0	0	0	NA	NA	1	1	1	0	0	0	0	0	0	0	0	0	0	0	0	0	1	1
NM_133496	148867	SLC30A7 || solute carrier family 30 (zinc transporter), member 7 (2)	1.33813	0.616313	0.460576	1.58252	21.3555	64.7137	3	1	0	1	0	0	0	0	0	0	1	-0.0083	-24.55	1	1	0	0	0	0	0	0	0	0	1	0	0	0	0	0	0	0
NM_001790	995	CDC25C || cell division cycle 25C (4)	1.33622	0.558146	0.417705	1.45508	21.3555	64.8939	2	1	1	1	1	0	0	0	0	0	1	NA	-18.1	0	0	0	0	0	0	0	0	0	0	1	0	1	0	0	0	0	0
NA	390773	na || similar to 60S ribosomal protein L17 (L23) (Amino acid starvation-induced protein) (ASI) (1)	1.33293	0.8915	0.668829	1.82839	21.3555	65.2035	NA	NA	NA	NA	NA	0	0	0	0	0	0	NA	NA	NA	NA	NA	NA	NA	NA	NA	NA	NA	NA	NA	NA	NA	NA	NA	NA	NA	NA
NM_001003713	9551	ATP5J2 || ATP synthase, H+ transporting, mitochondrial F0 complex, subunit f, isoform 2 (2)	1.3302	0.638083	0.479688	1.53028	21.3555	65.4597	0	0	0	0	0	0	0	0	0	0	0	NA	NA	0	0	0	0	0	NA	NA	NA	NA	NA	0	0	0	0	0	0	0	0
NM_024738	79794	FLJ21415 || hypothetical protein FLJ21415 (2)	1.32637	0.546354	0.411916	1.43978	21.3555	65.8202	1	2	1	0	0	0	0	0	0	0	1	-0.2872	-19.5	1	0	0	1	0	0	0	0	0	0	0	0	1	0	1	0	0	0
NM_005707	10081	PDCD7 || programmed cell death 7 (2)	1.32547	0.412875	0.311493	1.33262	21.3555	65.9053	1	0	0	0	0	0	0	0	0	0	0	NA	-22.26	0	1	0	0	0	0	0	0	0	0	0	0	0	0	0	0	0	0
NM_018154	55723	ASF1B || ASF1 anti-silencing function 1 homolog B (S. cerevisiae) (2)	1.3243	0.745333	0.562812	1.84014	21.3555	66.0151	1	0	0	0	0	0	0	0	0	0	0	NA	-18.17	0	0	0	0	0	0	0	0	0	0	0	0	0	0	0	0	0	0
NA	441447	na || similar to 40S ribosomal protein SA (p40) (34/67 kDa laminin rece1or) (Colon carcinoma laminin-binding protein) (NEM/1CHD4) (Multidrug resistance-associated protein MGr1-Ag) (1)	1.32128	0.512878	0.388169	1.41041	21.3555	66.2999	NA	NA	NA	NA	NA	0	0	0	0	0	0	NA	NA	NA	NA	NA	NA	NA	NA	NA	NA	NA	NA	NA	NA	NA	NA	NA	NA	NA	NA
NM_000194	3251	HPRT1 || hypoxanthine phosphoribosyltransferase 1 (Lesch-Nyhan syndrome) (41)	1.32046	0.615167	0.465874	1.50347	21.3555	66.377	1	0	0	0	0	0	0	0	0	0	0	NA	-18.76	1	0	0	0	0	0	0	0	0	0	0	0	0	0	0	0	0	0
NM_012088	25796	PGLS || 6-phosphogluconolactonase (1)	1.31806	0.698033	0.52959	1.58315	21.3555	66.6022	0	0	0	0	0	0	0	0	0	0	0	NA	NA	2	0	0	2	0	0	0	0	0	0	0	0	0	0	2	1	0	0
NM_001099285	5757	1MA || prothymosin, alpha (gene sequence 28) (2)	1.31137	1.07662	0.820992	1.85056	21.3555	67.2318	1	0	0	1	0	1	0	0	0	0	0	NA	-20.08	0	0	0	0	0	0	0	0	0	0	1	1	0	0	0	0	0	0
NM_006754	6856	SYPL1 || syna1ophysin-like 1 (2)	1.31067	0.658875	0.502701	1.64311	21.3555	67.2977	0	0	0	0	0	0	0	0	0	0	0	NA	NA	0	0	0	0	0	0	0	0	0	0	0	0	0	0	0	0	0	0
NM_001025247	27097	TAF5L || TAF5-like RNA polymerase II, p300/CBP-associated factor (PCAF)-associated factor, 65kDa (1)	1.31039	0.514958	0.392981	1.40798	21.3555	67.324	0	0	0	0	0	0	0	0	0	0	0	NA	NA	1	0	0	0	0	0	0	0	0	0	0	0	0	0	0	0	0	0
NM_004223	9246	UBE2L6 || ubiquitin-conjugating enzyme E2L 6 (1)	1.30997	0.686771	0.524264	1.58843	21.3555	67.3635	2	1	1	0	0	0	0	0	0	0	1	-0.1685	-17.78	0	0	0	0	0	0	0	0	0	0	0	0	1	0	0	0	0	0
NM_021131	5524	PPP2R4 || protein phosphatase 2A, regulatory subunit B' (PR 53) (1)	1.30338	0.698917	0.536233	1.55338	21.3555	67.9833	0	0	0	0	0	0	0	0	0	0	0	NA	NA	1	0	0	1	0	0	0	0	0	0	0	0	0	0	1	0	0	0
NM_004544	4705	NDUFA10 || NADH dehydrogenase (ubiquinone) 1 alpha subcomplex, 10, 42kDa (1)	1.30304	0.620375	0.476099	1.58472	21.3555	68.0156	0	0	0	0	0	0	0	0	0	0	0	NA	NA	1	0	0	0	0	0	0	0	0	0	0	0	0	0	0	0	0	0
NM_016156	8898	MT12 || myotubularin related protein 2 (2)	1.3019	0.537208	0.412634	1.44316	21.3555	68.1228	0	0	0	0	0	0	0	0	0	0	0	NA	NA	1	1	1	0	0	0	0	0	0	0	0	0	0	0	0	0	1	0
NM_001520	2975	GTF3C1 || general transcri1ion factor IIIC, polype1ide 1, alpha 220kDa (1)	1.30125	0.677042	0.520299	1.52834	21.3555	68.1834	1	1	1	1	1	0	0	0	0	0	1	-0.2177	-18.95	3	1	0	2	0	NA	NA	NA	NA	NA	1	0	1	0	2	0	0	0
NM_003366	7385	UQCRC2 || ubiquinol-cytochrome c reductase core protein II (2)	1.30125	0.560575	0.430796	1.4473	21.3555	68.1835	0	1	0	0	0	0	0	0	0	0	0	NA	-19.49	0	0	0	0	0	0	0	0	0	0	0	0	0	0	0	0	0	0
NM_203301	254170	FBXO33 || F-box protein 33 (1)	1.30038	0.60875	0.468133	1.50984	21.3555	68.2658	1	2	1	1	1	1	1	1	0	1	0	-0.3779	-20.85	0	0	0	0	0	0	0	0	0	0	1	1	1	1	0	0	0	0
NM_005717	10092	ARPC5 || actin related protein 2/3 complex, subunit 5, 16kDa (2)	1.29981	0.759625	0.584412	1.65657	21.3555	68.3192	0	2	0	0	0	0	0	0	0	0	0	NA	-16.75	0	0	0	0	0	0	0	0	0	0	0	0	0	0	0	0	0	0
NM_004827	9429	ABCG2 || ATP-binding cassette, sub-family G (WHITE), member 2 (1)	1.29542	0.589875	0.455356	1.46529	21.3555	68.7323	0	2	0	0	0	0	0	0	0	0	0	NA	-19.43	1	0	0	1	0	0	0	0	0	0	0	0	0	0	1	0	0	0
NM_033198	94005	PIGS || phosphatidylinositol glycan, class S (1)	1.29354	0.46825	0.36199	1.37934	21.3555	68.9082	0	0	0	0	0	0	0	0	0	0	0	NA	NA	0	1	0	0	0	NA	NA	NA	NA	NA	0	0	0	0	0	0	0	0
NM_001099743	55638	FLJ20366 || hypothetical protein FLJ20366 (1)	1.28646	0.623917	0.484988	1.51268	25.9702	69.5742	1	0	0	1	0	1	0	1	0	0	0	NA	-19.73	1	0	0	1	0	0	0	0	0	0	1	1	0	0	1	0	0	0
NM_018022	55092	TMEM51 || transmembrane protein 51 (1)	1.28633	0.415104	0.322705	1.33074	25.9702	69.5863	0	2	0	0	0	0	0	0	0	0	0	NA	NA	0	0	0	0	0	0	0	0	0	0	0	0	0	0	0	0	0	0
NM_018124	55159	RFWD3 || ring finger and WD repeat domain 3 (2)	1.28579	0.632167	0.491658	1.49479	25.9702	69.6373	2	1	1	1	1	0	0	0	0	0	1	-0.3128	-22.91	1	1	1	0	0	0	0	0	0	0	1	0	1	0	0	0	1	0
NM_000942	5479	PPIB || pe1idylprolyl isomerase B (cyclophilin B) (1)	1.2857	0.79475	0.618145	1.69836	25.9702	69.645	1	1	1	1	1	1	0	0	0	1	0	-0.2374	-17.02	0	0	0	0	0	0	0	0	0	0	1	1	1	1	0	0	0	0
NM_004339	754	1TG1IP || pituitary tumor-transforming 1 interacting protein (1)	1.28565	0.477142	0.371129	1.41674	25.9702	69.6501	2	1	1	0	0	0	0	0	0	0	1	-0.2376	-18.1	0	0	0	0	0	0	0	0	0	0	0	0	1	0	0	0	0	0
NM_002827	5770	1PN1 || protein tyrosine phosphatase, non-rece1or type 1 (1)	1.28429	0.581208	0.452552	1.55884	25.9702	69.7777	2	2	1	2	1	1	0	0	0	1	1	-0.1856	-16.6	0	1	0	0	0	0	0	0	0	0	2	0	1	0	0	0	0	0
NA	7784	ZP3 || zona pellucida glycoprotein 3 (sperm rece1or) (2)	1.28381	0.644333	0.501892	1.50301	25.9702	69.823	NA	NA	NA	NA	NA	0	0	0	0	0	0	NA	NA	NA	NA	NA	NA	NA	NA	NA	NA	NA	NA	NA	NA	NA	NA	NA	NA	NA	NA
NM_003668	8550	MAPKAPK5 || mitogen-activated protein kinase-activated protein kinase 5 (1)	1.28291	0.608563	0.474362	1.48201	25.9702	69.9077	0	0	0	0	0	0	0	0	0	0	0	NA	NA	0	0	0	0	0	0	0	0	0	0	0	0	0	0	0	0	0	0
NM_024104	79086	MGC2747 || hypothetical protein MGC2747 (3)	1.28209	0.499667	0.389729	1.3927	25.9702	69.9846	3	1	0	0	0	0	0	0	0	0	0	NA	NA	0	0	0	0	0	NA	NA	NA	NA	NA	0	0	0	0	0	0	0	0
NM_001003652	4087	SMAD2 || SMAD, mothers against DPP homolog 2 (Drosophila) (1)	1.27979	0.716083	0.559533	1.61635	25.9702	70.2004	3	3	1	1	1	0	0	0	0	0	1	-0.17	-27.59	1	0	0	1	0	0	0	0	0	0	1	0	1	0	1	1	0	0
NM_012482	23528	ZNF281 || zinc finger protein 281 (1)	1.27635	0.766046	0.600186	1.68865	25.9702	70.5234	1	2	0	1	0	1	0	0	0	1	0	-0.086	-19.33	0	0	0	0	0	0	0	0	0	0	1	1	0	0	0	0	0	0
NM_052905	114793	FMNL2 || formin-like 2 (1)	1.27558	0.471625	0.369734	1.4013	25.9702	70.5953	2	4	1	1	0	0	0	0	0	0	1	-0.2386	-20.02	0	2	0	0	0	0	0	0	0	0	1	0	1	0	0	0	0	0
NM_013237	27166	PX19 || px19-like protein (2)	1.27548	0.576042	0.451627	1.45412	25.9702	70.6047	0	0	0	0	0	0	0	0	0	0	0	NA	NA	0	0	0	0	0	0	0	0	0	0	0	0	0	0	0	0	0	0
NM_001079514	29855	UBN1 || ubinuclein 1 (1)	1.27297	0.589333	0.46296	1.4663	25.9702	70.8403	1	1	1	1	1	1	0	1	0	1	0	-0.2002	-17.24	1	1	0	0	0	0	0	0	0	0	1	1	1	1	0	0	0	0
NM_001038707	56882	CDC42SE1 || CDC42 small effector 1 (1)	1.27178	0.532737	0.41889	1.4416	25.9702	70.9515	2	2	2	1	1	0	0	0	0	0	1	-0.4833	-18.8	0	0	0	0	0	0	0	0	0	0	1	0	2	0	0	0	0	0
NM_002787	5683	PSMA2 || proteasome (prosome, macropain) subunit, alpha type, 2 (2)	1.2671	0.505396	0.398861	1.41006	25.9702	71.3908	0	0	0	0	0	0	0	0	0	0	0	NA	NA	1	1	0	0	0	NA	NA	NA	NA	NA	0	0	0	0	0	0	0	0
NM_014900	22837	COBLL1 || COBL-like 1 (1)	1.26537	0.527458	0.416843	1.41302	25.9702	71.553	0	1	0	0	0	0	0	0	0	0	0	NA	-17.08	3	2	1	3	1	0	0	0	0	0	0	0	0	0	3	0	1	0
NM_021241	58525	WIZ || widely-interspaced zinc finger motifs (2)	1.26351	0.738883	0.584784	1.64943	25.9702	71.7265	1	0	0	1	0	0	0	0	0	0	0	NA	-16.97	0	1	0	0	0	0	0	0	0	0	1	0	0	0	0	0	0	0
NM_000100	1476	CSTB || cystatin B (stefin B) (1)	1.2631	0.554167	0.438737	1.45663	25.9702	71.7656	0	0	0	0	0	0	0	0	0	0	0	NA	NA	0	0	0	0	0	0	0	0	0	0	0	0	0	0	0	0	0	0
NM_004973	3720	JARID2 || Jumonji, AT rich interactive domain 2 (1)	1.26301	0.655208	0.518769	1.5105	25.9702	71.774	1	1	1	1	1	0	1	0	0	0	1	-0.3012	NA	1	0	0	0	0	0	0	0	0	0	1	0	1	0	0	0	0	0
NM_017770	54898	ELOVL2 || elongation of very long chain fatty acids (FEN1/Elo2, SUR4/Elo3, yeast)-like 2 (1)	1.26185	0.466667	0.369828	1.36774	25.9702	71.8825	1	1	0	1	0	0	0	0	0	0	1	-0.1121	-20.52	0	1	0	0	0	0	0	0	0	0	1	0	0	0	0	0	0	0
NA	284593	FAM41C || family with sequence similarity 41, member C (1)	1.26128	0.51725	0.410098	1.42551	25.9702	71.9355	NA	NA	NA	NA	NA	0	0	0	0	0	0	NA	NA	NA	NA	NA	NA	NA	NA	NA	NA	NA	NA	NA	NA	NA	NA	NA	NA	NA	NA
NM_001690	523	ATP6V1A || ATPase, H+ transporting, lysosomal 70kDa, V1 subunit A (3)	1.25635	0.555687	0.442304	1.50718	25.9702	72.3974	1	2	1	0	0	1	0	0	0	1	0	-0.2928	-18.12	1	0	0	0	0	0	0	0	0	0	0	0	1	1	0	0	0	0
NM_020830	57590	WDFY1 || WD repeat and FYVE domain containing 1 (1)	1.25197	0.513705	0.410319	1.42336	25.9702	72.8072	3	1	1	1	0	0	0	0	0	0	1	-0.3024	-23.72	0	0	0	0	0	0	0	0	0	0	1	0	1	0	0	0	0	0
NM_013276	23729	CARKL || carbohydrate kinase-like (1)	1.25046	0.597042	0.477456	1.49457	25.9702	72.9475	2	2	2	1	1	0	0	0	0	0	1	-0.3685	-17.71	0	0	0	0	0	0	0	0	0	0	1	0	2	0	0	0	0	0
NM_016623	51571	FAM49B || family with sequence similarity 49, member B (2)	1.24904	0.766417	0.613606	1.83713	25.9702	73.081	0	0	0	0	0	0	0	0	0	0	0	NA	NA	0	0	0	0	0	0	0	0	0	0	0	0	0	0	0	0	0	0
NM_001677	481	ATP1B1 || ATPase, Na+/K+ transporting, beta 1 polype1ide (2)	1.24861	0.666417	0.533727	1.67926	25.9702	73.1209	0	1	0	0	0	0	0	0	0	0	1	-0.048	NA	0	0	0	0	0	0	0	0	0	0	0	0	0	0	0	0	0	0
NA	339991	na || similar to karyopherin alpha 2 (1)	1.24748	0.624333	0.500476	1.49509	25.9702	73.2266	NA	NA	NA	NA	NA	0	0	0	0	0	0	NA	NA	NA	NA	NA	NA	NA	NA	NA	NA	NA	NA	NA	NA	NA	NA	NA	NA	NA	NA
NA	122335	LOC122335 || similar to PPIA protein (1)	1.24705	0.48801	0.391332	1.39724	25.9702	73.2665	NA	NA	NA	NA	NA	0	0	0	0	0	0	NA	NA	NA	NA	NA	NA	NA	NA	NA	NA	NA	NA	NA	NA	NA	NA	NA	NA	NA	NA
NM_001042618	10038	PARP2 || poly (ADP-ribose) polymerase family, member 2 (2)	1.24287	0.555625	0.44705	1.45942	25.9702	73.6569	0	0	0	0	0	0	0	0	0	0	0	NA	NA	0	0	0	0	0	NA	NA	NA	NA	NA	0	0	0	0	0	0	0	0
NM_002734	5573	PRKAR1A || protein kinase, cAMP-dependent, regulatory, type I, alpha (tissue specific extinguisher 1) (2)	1.24182	0.596958	0.480711	1.55924	25.9702	73.7544	0	2	0	0	0	0	0	0	0	0	0	NA	-17.04	1	1	0	0	0	0	0	0	0	0	0	0	0	0	0	0	0	0
NM_001284	1176	AP3S1 || ada1or-related protein complex 3, sigma 1 subunit (1)	1.24135	0.735833	0.592771	1.73661	25.9702	73.7991	2	0	0	0	0	0	0	1	0	0	0	NA	NA	0	0	0	0	0	0	0	0	0	0	0	0	0	0	0	0	0	0
NM_001320	1460	CSNK2B || casein kinase 2, beta polype1ide (1)	1.23845	0.468908	0.378626	1.40567	25.9702	74.0694	0	0	0	0	0	0	0	0	0	0	0	NA	NA	0	0	0	0	0	0	0	0	0	0	0	0	0	0	0	0	0	0
NM_000175	2821	GPI || glucose phosphate isomerase (1)	1.23808	0.430375	0.347615	1.34837	25.9702	74.1038	0	0	0	0	0	0	0	0	0	0	0	NA	NA	0	0	0	0	0	0	0	0	0	0	0	0	0	0	0	0	0	0
NM_001149	288	ANK3 || ankyrin 3, node of Ranvier (ankyrin G) (19)	1.23764	0.815389	0.658824	2.10197	25.9702	74.1445	0	0	0	0	0	0	0	0	0	0	0	NA	NA	3	1	0	0	0	0	0	0	0	0	0	0	0	0	0	0	0	0
NM_181785	283537	LOC283537 || hypothetical protein LOC283537 (1)	1.23553	0.599542	0.485251	1.51224	25.9702	74.3414	1	1	1	1	1	0	0	0	0	0	1	-0.2901	-18.14	2	1	0	2	0	0	0	0	0	0	1	0	1	0	2	0	0	0
NM_032752	84838	ZNF496 || zinc finger protein 496 (1)	1.2335	0.434542	0.352283	1.34955	25.9702	74.5302	0	0	0	0	0	0	0	0	0	0	0	NA	NA	1	0	0	1	0	0	0	0	0	0	0	0	0	0	1	1	0	0
NM_006833	10980	COPS6 || COP9 constitutive photomorphogenic homolog subunit 6 (Arabidopsis) (1)	1.23319	0.596861	0.483997	1.4576	25.9702	74.5592	0	0	0	0	0	0	0	0	0	0	0	NA	NA	0	0	0	0	0	NA	NA	NA	NA	NA	0	0	0	0	0	0	0	0
NM_000895	4048	LTA4H || leukotriene A4 hydrolase (2)	1.23297	0.459083	0.37234	1.36713	25.9702	74.5801	0	0	0	0	0	0	0	0	0	0	0	NA	NA	0	0	0	0	0	0	0	0	0	0	0	0	0	0	0	0	0	0
NA	151146	LOC151146 || hypothetical protein LOC151146 (1)	1.23122	0.666268	0.541145	1.53721	25.9702	74.7428	NA	NA	NA	NA	NA	0	0	0	0	0	0	NA	NA	NA	NA	NA	NA	NA	NA	NA	NA	NA	NA	NA	NA	NA	NA	NA	NA	NA	NA
NM_015130	23158	KIAA0882 || KIAA0882 protein (1)	1.22956	0.537875	0.437454	1.43845	25.9702	74.8974	1	1	1	0	0	0	0	0	0	0	1	-0.3114	-27.62	1	0	0	0	0	0	0	0	0	0	0	0	1	0	0	0	0	0
NM_021079	4836	NMT1 || N-myristoyltransferase 1 (2)	1.22872	0.468771	0.381513	1.419	25.9702	74.9757	3	0	0	2	0	0	0	0	0	0	1	-0.0755	-18.79	1	1	1	1	1	NA	NA	NA	NA	NA	2	0	0	0	1	0	1	1
NM_013402	3992	FADS1 || fatty acid desaturase 1 (2)	1.22543	0.668292	0.545351	1.57171	31.6675	75.281	0	0	0	0	0	0	0	0	0	0	0	NA	-17.48	0	0	0	0	0	0	0	0	0	0	0	0	0	0	0	0	0	0
NM_004418	1844	DUSP2 || dual specificity phosphatase 2 (1)	1.22341	0.62975	0.51475	1.50332	31.6675	75.4691	0	1	0	0	0	0	0	0	0	0	0	NA	NA	0	0	0	0	0	0	0	0	0	0	0	0	0	0	0	0	0	0
NM_203298	118487	CHCHD1 || coiled-coil-helix-coiled-coil-helix domain containing 1 (2)	1.22294	0.57575	0.470792	1.4753	31.6675	75.5129	0	0	0	0	0	0	0	0	0	0	0	NA	NA	0	0	0	0	0	NA	NA	NA	NA	NA	0	0	0	0	0	0	0	0
NM_018848	8195	MKKS || McKusick-Kaufman syndrome (2)	1.22267	0.563125	0.460569	1.4702	31.6675	75.5377	0	0	0	0	0	0	0	0	0	0	0	NA	NA	0	0	0	0	0	1	1	1	0	0	0	0	0	0	0	0	0	0
NM_006442	10589	DRAP1 || DR1-associated protein 1 (negative cofactor 2 alpha) (1)	1.21902	0.595581	0.488573	1.48736	31.6675	75.8765	0	0	0	0	0	0	0	0	0	0	0	NA	NA	0	0	0	0	0	0	0	0	0	0	0	0	0	0	0	0	0	0
NM_002819	5725	1BP1 || polypyrimidine tract binding protein 1 (2)	1.21779	0.739125	0.606938	1.82928	31.6675	75.9906	2	1	1	1	0	1	1	0	0	1	1	-0.1713	NA	1	0	0	0	0	0	0	0	0	0	1	1	1	0	0	0	0	0
NM_001012321	3921	RPSA || ribosomal protein SA (3)	1.21523	0.600646	0.494264	1.55177	31.6675	76.228	0	0	0	0	0	0	0	0	0	0	0	NA	NA	0	0	0	0	0	NA	NA	NA	NA	NA	0	0	0	0	0	0	0	0
NM_001277	1119	CHKA || choline kinase alpha (2)	1.21408	0.619125	0.509953	1.48573	31.6675	76.3348	0	0	0	0	0	0	0	0	0	0	0	NA	NA	1	0	0	1	0	0	0	0	0	0	0	0	0	0	1	1	0	0
NM_001017980	203547	LOC203547 || hypothetical protein LOC203547 (2)	1.2123	0.531312	0.438269	1.49788	31.6675	76.5001	2	2	0	0	0	0	0	0	0	0	0	NA	-20.34	0	0	0	0	0	0	0	0	0	0	0	0	0	0	0	0	0	0
NM_006432	10577	NPC2 || Niemann-Pick disease, type C2 (1)	1.21087	0.525845	0.434269	1.42473	31.6675	76.632	0	0	0	0	0	0	0	0	0	0	0	NA	NA	2	1	1	0	0	0	0	0	0	0	0	0	0	0	0	0	1	0
NM_145052	139596	RP11-311P8.3 || hypothetical protein MGC23937 similar to CG4798 (1)	1.20995	0.51225	0.423366	1.46509	31.6675	76.7177	2	2	2	0	0	0	0	0	0	0	1	-0.3822	-19.34	0	0	0	0	0	0	0	0	0	0	0	0	2	0	0	0	0	0
NM_001040708	23462	HEY1 || hairy/enhancer-of-split related with YRPW motif 1 (2)	1.20978	0.556979	0.460396	1.55215	31.6675	76.7328	0	0	0	0	0	0	0	0	0	0	0	NA	NA	1	1	1	0	0	0	0	0	0	0	0	0	0	0	0	0	1	0
NM_212552	388962	BOLA3 || bolA-like 3 (E. coli) (2)	1.20836	0.518125	0.428785	1.41946	31.6675	76.8649	0	0	0	0	0	0	0	0	0	0	0	NA	-21.13	0	0	0	0	0	NA	NA	NA	NA	NA	0	0	0	0	0	0	0	0
NM_005868	10282	BET1 || BET1 homolog (S. cerevisiae) (1)	1.20764	0.5185	0.42935	1.49076	31.6675	76.9314	1	2	1	0	0	1	0	0	0	1	0	-0.2779	-20.91	0	0	0	0	0	0	0	0	0	0	0	0	1	1	0	0	0	0
NM_199245	6843	VAMP1 || vesicle-associated membrane protein 1 (syna1obrevin 1) (1)	1.20681	0.53125	0.44021	1.41378	31.6675	77.008	4	2	1	1	0	0	0	0	0	0	0	NA	-24.26	0	0	0	0	0	0	0	0	0	0	1	0	1	0	0	0	0	0
NM_004766	9276	COPB2 || coatomer protein complex, subunit beta 2 (beta prime) (1)	1.20421	0.507458	0.421404	1.44306	31.6675	77.2485	0	0	0	0	0	0	0	0	0	0	0	NA	NA	2	2	1	1	0	0	0	0	0	0	0	0	0	0	1	0	1	0
NM_133259	10128	LRPPRC || leucine-rich PPR-motif containing (1)	1.20258	0.487458	0.405343	1.38606	31.6675	77.3986	1	0	0	0	0	0	0	0	0	0	0	NA	-20.34	2	4	1	1	0	0	0	0	0	0	0	0	0	0	1	0	1	0
NM_007169	10400	PEMT || phosphatidylethanolamine N-methyltransferase (2)	1.20053	0.690625	0.575265	1.5413	31.6675	77.5877	1	1	1	0	0	0	0	0	0	0	1	-0.1424	-18.49	0	0	0	0	0	0	0	0	0	0	0	0	1	0	0	0	0	0
NM_025104	80174	DRF1 || Dbf4-related factor 1 (4)	1.19331	0.638917	0.535415	1.55609	31.6675	78.2535	0	0	0	0	0	0	0	0	0	0	0	NA	NA	0	0	0	0	0	0	0	0	0	0	0	0	0	0	0	0	0	0
NM_024685	79738	FLJ23560 || hypothetical protein FLJ23560 (1)	1.19291	0.536367	0.44963	1.4884	31.6675	78.2906	1	0	0	0	0	0	0	0	0	0	0	NA	-22.26	2	3	1	1	1	0	0	0	0	0	0	0	0	0	1	0	1	0
NM_032581	84668	DRCTNNB1A || down-regulated by Ctnnb1, a (2)	1.19225	0.485271	0.407023	1.37986	31.6675	78.3515	0	0	0	0	0	0	0	0	0	0	0	NA	NA	1	1	1	0	0	0	0	0	0	0	0	0	0	0	0	0	1	1
NM_024629	79682	MLF1IP || MLF1 interacting protein (1)	1.19223	0.616833	0.517377	1.47857	31.6675	78.3527	0	0	0	0	0	0	0	0	0	0	0	NA	NA	1	1	1	1	1	0	0	0	0	0	0	0	0	0	1	0	1	0
NM_005241	2122	EVI1 || ecotropic viral integration site 1 (2)	1.191	0.63725	0.535056	1.54625	31.6675	78.4663	0	0	0	0	0	0	0	0	0	0	0	NA	-19.54	1	1	0	1	0	0	1	0	0	0	0	0	1	1	1	0	0	0
NM_017526	54741	LEPROT || le1in rece1or overlapping transcri1 (1)	1.18878	0.696929	0.586258	1.70442	31.6675	78.6705	0	0	0	0	0	0	0	0	0	0	0	NA	-17.15	0	0	0	0	0	0	0	0	0	0	0	0	0	0	0	0	0	0
NM_014473	27292	HSA9761 || dimethyladenosine transferase (1)	1.18835	0.475158	0.399846	1.3787	31.6675	78.7094	2	2	2	0	0	0	0	0	0	0	1	-0.3718	NA	0	0	0	0	0	0	0	0	0	0	0	0	2	0	0	0	0	0
NM_001040613	54968	FLJ20533 || hypothetical protein FLJ20533 (1)	1.18332	0.542894	0.458791	1.47512	31.6675	79.1716	1	0	0	0	0	0	0	0	0	0	0	NA	-21.33	0	0	0	0	0	0	0	0	0	0	0	0	0	0	0	0	0	0
NA	6169	RPL38 || ribosomal protein L38 (2)	1.18091	0.516208	0.437128	1.39662	31.6675	79.3923	NA	NA	NA	NA	NA	0	0	0	0	0	0	NA	NA	NA	NA	NA	NA	NA	NA	NA	NA	NA	NA	NA	NA	NA	NA	NA	NA	NA	NA
NM_018473	55856	THEM2 || thioesterase superfamily member 2 (1)	1.18083	0.704056	0.596238	1.644	31.6675	79.3994	0	0	0	0	0	0	0	0	0	0	0	NA	NA	0	0	0	0	0	0	0	0	0	0	0	0	0	0	0	0	0	0
NM_017893	57715	SEMA4G || sema domain, immunoglobulin domain (Ig), transmembrane domain (TM) and short cytoplasmic domain, (semaphorin) 4G (1)	1.18068	0.539784	0.457182	1.44062	31.6675	79.4135	1	1	0	0	0	0	0	1	0	0	0	NA	-17.84	2	1	1	1	1	1	0	0	0	0	0	0	0	0	1	0	1	0
NM_033055	64645	HIAT1 || hippocampus abundant transcri1 1 (1)	1.18007	0.540583	0.458093	1.50316	31.6675	79.4687	1	1	1	1	1	1	1	0	0	1	0	-0.4344	-17.04	1	0	0	0	0	NA	NA	NA	NA	NA	1	1	1	1	0	0	0	0
NM_016063	51020	C6orf74 || chromosome 6 open reading frame 74 (2)	1.17983	0.632618	0.536192	1.58901	31.6675	79.4906	0	0	0	0	0	0	0	0	0	0	0	NA	NA	0	0	0	0	0	0	0	0	0	0	0	0	0	0	0	0	0	0
NM_207113	84255	SLC37A3 || solute carrier family 37 (glycerol-3-phosphate transporter), member 3 (3)	1.17835	0.520921	0.442076	1.42316	31.6675	79.6262	1	2	1	0	0	1	0	0	0	0	0	NA	-21.74	0	0	0	0	0	0	0	0	0	0	0	0	1	1	0	0	0	0
NM_022754	94081	SFXN1 || sideroflexin 1 (1)	1.17717	0.771333	0.655245	1.59306	31.6675	79.7346	1	1	0	1	0	0	0	0	0	0	1	-0.121	-22.1	1	1	0	0	0	0	0	0	0	0	1	0	0	0	0	0	0	0
NM_018999	54462	KIAA1128 || KIAA1128 (1)	1.17674	0.617125	0.524436	1.57705	31.6675	79.7736	0	1	0	0	0	0	0	0	0	0	0	NA	-23.92	3	2	2	1	1	0	0	0	0	0	0	0	0	0	1	0	2	0
NM_001003789	11158	RABL2B || RAB, member of RAS oncogene family-like 2B (3)	1.17662	0.409208	0.347784	1.3366	31.6675	79.785	1	1	0	1	0	0	0	0	1	0	1	-0.1035	-18.48	0	0	0	0	0	0	0	0	0	0	1	0	0	0	0	0	0	0
NM_014325	23603	CORO1C || coronin, actin binding protein, 1C (1)	1.17625	0.779375	0.662592	1.63044	31.6675	79.8183	4	3	2	2	2	1	1	0	0	1	0	-0.6129	-17.42	1	3	1	1	1	0	0	0	0	0	2	1	2	2	1	0	1	0
NM_144772	128240	APOA1BP || apolipoprotein A-I binding protein (2)	1.17585	0.567875	0.482948	1.44962	31.6675	79.8548	0	0	0	0	0	0	0	0	0	0	0	NA	NA	1	1	1	0	0	NA	NA	NA	NA	NA	0	0	0	0	0	0	1	0
NM_001655	372	ARCN1 || archain 1 (1)	1.17373	0.71675	0.610661	1.5578	31.6675	80.0487	3	4	2	1	1	1	1	1	1	1	1	-0.6033	-20.4	0	0	0	0	0	0	0	0	0	0	1	1	2	1	0	0	0	0
NM_018447	55831	LOC55831 || 30 kDa protein (2)	1.16877	0.479958	0.410654	1.38328	31.6675	80.5013	0	0	0	0	0	0	0	0	0	0	0	NA	NA	1	2	1	0	0	1	0	0	1	0	0	0	0	0	0	0	1	1
NM_015171	23214	XPO6 || exportin 6 (1)	1.16781	0.60975	0.522129	1.46888	31.6675	80.5879	2	0	0	2	0	1	1	0	1	1	0	-0.2442	-19.31	0	0	0	0	0	0	0	0	0	0	2	2	0	0	0	0	0	0
NM_001083613	124446	LOC124446 || hypothetical protein BC017488 (1)	1.16688	0.639542	0.548078	1.53319	31.6675	80.6728	0	0	0	0	0	0	0	0	0	0	0	NA	NA	1	1	1	1	1	0	0	0	0	0	0	0	0	0	1	1	1	1
NM_152296	478	ATP1A3 || ATPase, Na+/K+ transporting, alpha 3 polype1ide (2)	1.16669	0.46805	0.401176	1.36991	31.6675	80.6898	1	0	0	0	0	0	0	0	0	0	0	NA	-21.29	1	1	1	0	0	0	0	0	0	0	0	0	0	0	0	0	1	0
NM_031954	83892	KCTD10 || potassium channel tetramerisation domain containing 10 (1)	1.16651	0.524438	0.449578	1.42922	31.6675	80.7065	2	1	1	1	1	0	0	0	0	0	1	-0.3908	-19.56	0	0	0	0	0	0	0	0	0	0	1	0	1	0	0	0	0	0
NM_001025234	7106	1PAN4 || tetraspanin 4 (1)	1.16371	0.847767	0.728501	1.59915	31.6675	80.9608	1	1	1	1	1	1	0	0	0	1	0	-0.2919	-16.51	0	0	0	0	0	0	0	0	0	0	1	1	1	1	0	0	0	0
NM_018004	55076	TMEM45A || transmembrane protein 45A (1)	1.16253	0.482292	0.414866	1.43542	31.6675	81.0688	0	0	0	0	0	0	0	0	0	0	0	NA	NA	0	0	0	0	0	0	0	0	0	0	0	0	0	0	0	0	0	0
NM_004237	9319	TRIP13 || thyroid hormone rece1or interactor 13 (1)	1.16236	0.501831	0.431735	1.4124	31.6675	81.0838	0	0	0	0	0	0	0	0	0	0	0	NA	NA	1	0	0	1	0	0	0	0	0	0	0	0	0	0	1	0	0	0
NA	285958	LOC285958 || hypothetical protein LOC285958 (3)	1.16213	0.515833	0.443868	1.42431	31.6675	81.1045	NA	NA	NA	NA	NA	0	0	0	0	0	0	NA	NA	NA	NA	NA	NA	NA	NA	NA	NA	NA	NA	NA	NA	NA	NA	NA	NA	NA	NA
NM_000484	351	APP || amyloid beta (A4) precursor protein (protease nexin-II, Alzheimer disease) (23)	1.16174	0.6085	0.523782	1.4565	31.6675	81.1399	0	1	0	0	0	0	0	0	0	0	0	NA	-17.57	0	0	0	0	0	0	0	0	0	0	0	0	0	0	0	0	0	0
NM_024545	79595	SAP130 || mSin3A-associated protein 130 (1)	1.15999	0.416	0.358623	1.34282	31.6675	81.2985	1	1	0	0	0	0	0	0	0	0	0	NA	-20.32	5	0	0	1	0	0	0	0	0	0	0	0	0	0	1	0	0	0
NM_018405	55352	HSA272196 || hypothetical protein, clone 2746033 (2)	1.15962	0.688938	0.594106	1.55689	31.6675	81.3322	0	0	0	0	0	0	0	0	0	0	0	NA	NA	1	0	0	0	0	NA	NA	NA	NA	NA	0	0	0	0	0	0	0	0
NM_153269	140680	C20orf96 || chromosome 20 open reading frame 96 (1)	1.15944	0.428917	0.369934	1.33805	31.6675	81.3486	0	0	0	0	0	0	0	0	0	0	0	NA	NA	1	1	1	0	0	0	0	0	0	0	0	0	0	0	0	0	1	0
NM_023079	65264	FLJ13855 || hypothetical protein FLJ13855 (1)	1.15926	0.611792	0.527745	1.52258	31.6675	81.3652	1	0	0	0	0	0	0	0	0	0	0	NA	-16.72	0	0	0	0	0	0	0	0	0	0	0	0	0	0	0	0	0	0
NM_001098504	10521	DDX17 || DEAD (Asp-Glu-Ala-Asp) box polype1ide 17 (10)	1.1568	0.804075	0.695086	1.77198	31.6675	81.5879	1	1	1	0	0	1	0	0	0	0	0	NA	-17.29	0	0	0	0	0	0	0	0	0	0	0	0	1	1	0	0	0	0
NM_020839	57599	WDR48 || WD repeat domain 48 (1)	1.15445	0.547667	0.474394	1.51247	37.9074	81.8	1	1	1	1	1	1	1	0	0	1	0	-0.3858	NA	0	2	0	0	0	NA	NA	NA	NA	NA	1	1	1	1	0	0	0	0
NM_022003	53826	FXYD6 || FXYD domain containing ion transport regulator 6 (1)	1.15442	0.468708	0.406013	1.37569	37.9074	81.8035	1	0	0	0	0	0	0	0	0	0	0	NA	-20.08	0	0	0	0	0	0	0	0	0	0	0	0	0	0	0	0	0	0
NM_002574	5052	PRDX1 || peroxiredoxin 1 (2)	1.15391	0.462667	0.400955	1.39022	37.9074	81.849	0	0	0	0	0	0	0	0	0	0	0	NA	NA	1	1	1	0	0	0	0	0	0	0	0	0	0	0	0	0	1	1
NM_001839	1266	CNN3 || calponin 3, acidic (1)	1.15299	0.573958	0.497801	1.4418	37.9074	81.9325	1	1	1	0	0	1	1	0	0	1	0	-0.2994	-25.89	0	0	0	0	0	0	0	0	0	0	0	0	1	1	0	0	0	0
NM_001031	6234	RPS28 || ribosomal protein S28 (3)	1.15055	0.457292	0.397455	1.36824	37.9074	82.1527	0	0	0	0	0	0	0	0	0	0	0	NA	NA	0	0	0	0	0	NA	NA	NA	NA	NA	0	0	0	0	0	0	0	0
NM_018246	55246	FLJ10853 || hypothetical protein FLJ10853 (1)	1.14905	0.446833	0.388871	1.39952	37.9074	82.2877	1	1	0	1	0	0	0	0	0	0	1	0.061	NA	0	0	0	0	0	0	0	0	0	0	1	0	0	0	0	0	0	0
NA	441486	na || similar to 40S ribosomal protein S26 (1)	1.14827	0.578058	0.503418	1.45412	37.9074	82.3583	NA	NA	NA	NA	NA	0	0	0	0	0	0	NA	NA	NA	NA	NA	NA	NA	NA	NA	NA	NA	NA	NA	NA	NA	NA	NA	NA	NA	NA
NM_020185	56940	DUSP22 || dual specificity phosphatase 22 (1)	1.14783	0.447308	0.389701	1.37297	37.9074	82.3982	0	0	0	0	0	0	0	0	0	0	0	NA	NA	0	1	0	0	0	0	0	0	0	0	0	0	0	0	0	0	0	0
NM_030954	81790	RNF170 || ring finger protein 170 (1)	1.14621	0.578952	0.505102	1.45527	37.9074	82.5437	0	0	0	0	0	0	0	0	0	0	0	NA	NA	0	1	0	0	0	0	0	0	0	0	0	0	0	0	0	0	0	0
NM_181803	11065	UBE2C || ubiquitin-conjugating enzyme E2C (2)	1.14523	0.753	0.657512	2.0347	37.9074	82.6322	0	0	0	0	0	0	0	0	0	0	0	NA	NA	0	0	0	0	0	0	0	0	0	0	0	0	0	0	0	0	0	0
NM_020468	57231	SNX14 || sorting nexin 14 (1)	1.14376	0.575375	0.503054	1.44157	37.9074	82.7635	0	0	0	0	0	0	0	0	0	0	0	NA	NA	2	2	1	2	1	0	0	0	0	0	0	0	0	0	2	1	1	1
NM_018834	9782	MATR3 || matrin 3 (4)	1.14249	0.498833	0.436618	1.38757	37.9074	82.8776	1	1	1	1	1	1	1	0	0	1	0	-0.4331	-23.11	1	0	0	1	0	0	0	0	0	0	1	1	1	1	1	1	0	0
NM_001904	1499	CTNNB1 || catenin (cadherin-associated protein), beta 1, 88kDa (1)	1.14136	0.435375	0.381452	1.36083	37.9074	82.9793	0	0	0	0	0	0	0	0	0	0	0	NA	NA	3	0	0	2	0	0	0	0	0	0	0	0	0	0	2	1	0	0
NM_001033925	7073	TIAL1 || TIA1 cytotoxic granule-associated RNA binding protein-like 1 (2)	1.14129	0.853083	0.747471	1.7999	37.9074	82.9854	0	0	0	0	0	0	0	0	0	0	0	NA	-18.81	0	1	0	0	0	0	0	0	0	0	0	0	0	0	0	0	0	0
NM_006854	11014	KDELR2 || KDEL (Lys-Asp-Glu-Leu) endoplasmic reticulum protein retention rece1or 2 (1)	1.14103	0.49725	0.43579	1.44317	37.9074	83.0089	3	1	0	1	0	0	0	0	0	0	1	-0.1792	-23.46	0	0	0	0	0	0	0	0	0	0	NA	NA	NA	NA	NA	NA	NA	NA
NM_005052	5881	RAC3 || ras-related C3 botulinum toxin substrate 3 (rho family, small GTP binding protein Rac3) (1)	1.14028	0.725792	0.636501	1.66159	37.9074	83.0759	0	1	0	0	0	0	0	0	0	0	0	NA	-18.29	0	0	0	0	0	0	0	0	0	0	0	0	0	0	0	0	0	0
NM_130898	148327	CREB3L4 || cAMP responsive element binding protein 3-like 4 (1)	1.13973	0.531	0.4659	1.45965	37.9074	83.1257	0	0	0	0	0	0	0	0	0	0	0	NA	NA	1	0	0	1	0	0	0	0	0	0	0	0	0	0	1	0	0	0
NM_080821	116151	C20orf108 || chromosome 20 open reading frame 108 (1)	1.13912	0.584125	0.512784	1.44612	37.9074	83.1798	1	2	1	1	1	0	0	0	0	0	1	-0.2627	-24.07	0	0	0	0	0	0	0	0	0	0	1	0	1	0	0	0	0	0
NM_030579	80777	CYB5-M || outer mitochondrial membrane cytochrome b5 (1)	1.13852	0.422609	0.37119	1.34604	37.9074	83.2337	1	3	1	0	0	0	0	0	0	1	0	-0.2865	-17.42	0	0	0	0	0	0	0	0	0	0	0	0	1	0	0	0	0	0
NM_020703	57463	AMIGO || amphoterin-induced gene and ORF (1)	1.13696	0.504333	0.443582	1.39906	37.9074	83.3739	0	0	0	0	0	0	0	0	0	0	0	NA	NA	1	0	0	0	0	0	0	0	0	0	0	0	0	0	0	0	0	0
NM_032449	200014	KIAA1836 || KIAA1836 protein (2)	1.1357	0.515375	0.453797	1.46065	37.9074	83.4867	2	1	0	0	0	0	0	0	0	0	0	NA	-17.97	2	1	1	1	1	0	0	0	0	0	0	0	0	0	1	0	1	0
NA	6207	RPS13 || ribosomal protein S13 (3)	1.13527	0.471375	0.415208	1.36234	37.9074	83.5244	NA	NA	NA	NA	NA	0	0	0	0	0	0	NA	NA	NA	NA	NA	NA	NA	NA	NA	NA	NA	NA	NA	NA	NA	NA	NA	NA	NA	NA
NM_004374	1345	COX6C || cytochrome c oxidase subunit VIc (2)	1.13282	0.502182	0.443305	1.4094	37.9074	83.744	0	0	0	0	0	0	0	0	0	0	0	NA	NA	0	0	0	0	0	0	0	0	0	0	0	0	0	0	0	0	0	0
NM_016467	94101	ORMDL1 || ORM1-like 1 (S. cerevisiae) (4)	1.13205	0.506583	0.447493	1.4651	37.9074	83.8125	0	0	0	0	0	0	0	0	0	0	0	NA	-17.42	1	0	0	0	0	0	0	0	0	0	0	0	0	0	0	0	0	0
NM_144600	123811	FLJ31153 || hypothetical protein FLJ31153 (2)	1.13055	0.580167	0.513173	1.44976	37.9074	83.9462	0	0	0	0	0	0	0	0	0	0	0	NA	NA	0	0	0	0	0	NA	NA	NA	NA	NA	0	0	0	0	0	0	0	0
NM_002140	3190	HNRPK || heterogeneous nuclear ribonucleoprotein K (3)	1.12858	0.934708	0.828214	1.86541	37.9074	84.1211	1	1	1	0	0	1	1	0	0	0	0	NA	-22.86	1	0	0	1	0	0	0	0	0	0	0	0	1	1	1	0	0	0
NM_007353	2768	GNA12 || guanine nucleotide binding protein (G protein) alpha 12 (1)	1.12803	0.613958	0.544274	1.45253	37.9074	84.1702	2	1	1	1	0	0	0	0	0	0	1	-0.2229	-19.81	1	0	0	0	0	0	0	0	0	0	1	0	1	0	0	0	0	0
NM_017660	54815	GATAD2A || GATA zinc finger domain containing 2A (1)	1.12793	0.680458	0.60328	1.49571	37.9074	84.1791	0	1	0	0	0	0	0	0	0	0	0	NA	-21.33	2	3	2	1	1	0	0	0	0	0	0	0	0	0	1	0	2	1
NM_006808	10952	SEC61B || Sec61 beta subunit (2)	1.12752	0.521417	0.462444	1.39343	37.9074	84.2155	0	0	0	0	0	0	0	0	0	0	0	NA	-17.14	0	0	0	0	0	0	0	0	0	0	0	0	0	0	0	0	0	0
NM_022753	64766	S100PBPR || S100P binding protein Riken (1)	1.12747	0.357917	0.317452	1.28686	37.9074	84.2205	2	1	1	0	0	0	0	0	0	0	1	-0.0927	NA	1	0	0	0	0	0	0	0	0	0	0	0	1	0	0	0	0	0
NM_032521	84612	PARD6B || par-6 partitioning defective 6 homolog beta (C. elegans) (1)	1.12637	0.556208	0.493806	1.49734	37.9074	84.3181	3	2	0	0	0	0	0	0	0	0	0	NA	-22.65	0	0	0	0	0	0	0	0	0	0	0	0	0	0	0	0	0	0
NM_022100	63931	1PS14 || mitochondrial ribosomal protein S14 (1)	1.12124	0.426138	0.38006	1.35748	37.9074	84.773	0	0	0	0	0	0	0	0	0	0	0	NA	-17.52	0	0	0	0	0	NA	NA	NA	NA	NA	0	0	0	0	0	0	0	0
NM_018464	55847	C10orf70 || chromosome 10 open reading frame 70 (1)	1.12081	0.446583	0.398448	1.38426	37.9074	84.8114	0	0	0	0	0	0	0	0	0	0	0	NA	NA	0	0	0	0	0	0	0	0	0	0	0	0	0	0	0	0	0	0
NM_018838	55967	DAP13 || 13kDa differentiation-associated protein (2)	1.1198	0.509062	0.454602	1.38279	37.9074	84.9006	0	0	0	0	0	0	0	0	0	0	0	NA	NA	0	1	0	0	0	0	0	0	0	0	0	0	0	0	0	0	0	0
NM_005984	6576	SLC25A1 || solute carrier family 25 (mitochondrial carrier; citrate transporter), member 1 (2)	1.11868	0.754375	0.674346	1.53478	37.9074	84.9999	1	0	0	1	0	1	0	1	0	1	0	0.0289	-16.5	0	0	0	0	0	0	0	0	0	0	1	1	0	0	0	0	0	0
NM_012230	22932	POMZP3 || POM (POM121 homolog, rat) and ZP3 fusion (4)	1.11808	0.497008	0.444521	1.37968	37.9074	85.0528	0	0	0	0	0	0	0	0	0	0	0	NA	NA	1	0	0	1	0	0	0	0	0	0	0	0	0	0	1	0	0	0
NM_025203	80304	FLJ21945 || hypothetical protein FLJ21945 (1)	1.11465	0.397667	0.356763	1.31746	37.9074	85.3551	0	0	0	0	0	0	0	0	0	0	0	NA	NA	1	0	0	1	0	0	0	0	0	0	0	0	0	0	1	0	0	0
NM_002670	5357	PLS1 || plastin 1 (I isoform) (1)	1.11436	0.619268	0.555716	1.82259	37.9074	85.3808	0	0	0	0	0	0	0	0	0	0	0	NA	NA	1	1	1	0	0	0	0	0	0	0	0	0	0	0	0	0	1	0
NM_002713	5511	PPP1R8 || protein phosphatase 1, regulatory (inhibitor) subunit 8 (1)	1.11375	0.485625	0.436027	1.44072	37.9074	85.4346	0	0	0	0	0	0	0	0	0	0	0	NA	NA	0	0	0	0	0	0	2	0	0	0	0	0	0	0	0	0	0	0
NM_002840	5792	1PRF || protein tyrosine phosphatase, rece1or type, F (2)	1.11261	0.558708	0.502161	1.54499	37.9074	85.5352	2	3	1	1	1	0	0	0	0	0	1	-0.3702	-17.18	0	0	0	0	0	0	0	0	0	0	1	0	1	0	0	0	0	0
NA	60314	C12orf10 || chromosome 12 open reading frame 10 (2)	1.11244	0.519792	0.467253	1.42399	37.9074	85.5497	NA	NA	NA	NA	NA	0	0	0	0	0	0	NA	NA	NA	NA	NA	NA	NA	NA	NA	NA	NA	NA	NA	NA	NA	NA	NA	NA	NA	NA
NA	388076	na || similar to 40S ribosomal protein S8 (1)	1.11212	0.437229	0.393148	1.34291	37.9074	85.5778	NA	NA	NA	NA	NA	0	0	0	0	0	0	NA	NA	NA	NA	NA	NA	NA	NA	NA	NA	NA	NA	NA	NA	NA	NA	NA	NA	NA	NA
NM_004935	1020	CDK5 || cyclin-dependent kinase 5 (1)	1.1112	0.510167	0.459112	1.47315	37.9074	85.6587	0	0	0	0	0	0	0	0	0	0	0	NA	NA	1	0	0	0	0	0	0	0	0	0	0	0	0	0	0	0	0	0
NA	144438	LOC144438 || hypothetical protein LOC144438 (1)	1.10929	0.443083	0.39943	1.35189	37.9074	85.8268	NA	NA	NA	NA	NA	0	0	0	0	0	0	NA	NA	NA	NA	NA	NA	NA	NA	NA	NA	NA	NA	NA	NA	NA	NA	NA	NA	NA	NA
NM_001759	894	CCND2 || cyclin D2 (1)	1.10846	0.523167	0.471974	1.42026	37.9074	85.8993	3	4	2	1	0	1	0	0	0	1	1	-0.2884	-23.43	0	0	0	0	0	0	0	0	0	0	1	1	2	0	0	0	0	0
NM_138300	90780	PYGO2 || pygopus homolog 2 (Drosophila) (1)	1.10818	0.709037	0.63982	1.52791	37.9074	85.924	2	1	1	0	0	0	0	0	0	0	1	-0.0827	-17.74	1	0	0	0	0	0	0	0	0	0	0	0	1	0	0	0	0	0
NM_001096	47	ACLY || ATP citrate lyase (1)	1.10694	0.355417	0.32108	1.27462	37.9074	86.033	0	0	0	0	0	0	0	0	0	0	0	NA	NA	0	1	0	0	0	0	0	0	0	0	0	0	0	0	0	0	0	0
NM_004705	5612	PRKRIR || protein-kinase, interferon-inducible double stranded RNA dependent inhibitor, repressor of (P58 repressor) (2)	1.1066	0.558333	0.504546	1.4246	37.9074	86.0623	1	1	1	0	0	0	0	0	0	0	1	-0.2392	-20.12	0	0	0	0	0	NA	NA	NA	NA	NA	0	0	1	0	0	0	0	0
NA	253264	LOC253264 || hypothetical protein LOC253264 (1)	1.10627	0.494021	0.446565	1.43258	37.9074	86.0918	NA	NA	NA	NA	NA	0	0	0	0	0	0	NA	NA	NA	NA	NA	NA	NA	NA	NA	NA	NA	NA	NA	NA	NA	NA	NA	NA	NA	NA
NM_019004	54467	ANKIB1 || ankyrin repeat and IBR domain containing 1 (2)	1.10538	0.558563	0.505313	1.42779	37.9074	86.1697	1	1	1	0	0	0	0	0	0	0	0	NA	-23.07	0	0	0	0	0	0	0	0	0	0	0	0	1	1	0	0	0	0
NA	151162	LOC151162 || hypothetical protein LOC151162 (2)	1.10297	0.525917	0.476817	1.40801	37.9074	86.38	NA	NA	NA	NA	NA	0	0	0	0	0	0	NA	NA	NA	NA	NA	NA	NA	NA	NA	NA	NA	NA	NA	NA	NA	NA	NA	NA	NA	NA
NA	285321	na || similar to tropomyosin 4 (1)	1.09622	0.519958	0.474321	1.52774	37.9074	86.9689	NA	NA	NA	NA	NA	0	0	0	0	0	0	NA	NA	NA	NA	NA	NA	NA	NA	NA	NA	NA	NA	NA	NA	NA	NA	NA	NA	NA	NA
NM_001012271	332	BIRC5 || baculoviral IAP repeat-containing 5 (survivin) (1)	1.0948	0.472742	0.431805	1.39382	37.9074	87.0917	0	0	0	0	0	0	0	0	0	0	0	NA	NA	0	1	0	0	0	0	0	0	0	0	0	0	0	0	0	0	0	0
NM_005949	4494	MT1F || metallothionein 1F (functional) (2)	1.0947	0.597458	0.545775	1.44164	37.9074	87.1008	1	1	1	0	0	0	0	0	0	0	1	-0.2675	-22.22	0	0	0	0	0	0	0	0	0	0	0	0	1	0	0	0	0	0
NM_001011699	93323	NY-SAR-48 || sarcoma antigen NY-SAR-48 (1)	1.09459	0.455792	0.416405	1.37394	37.9074	87.1104	0	1	0	0	0	0	0	0	0	0	0	NA	NA	0	1	0	0	0	0	0	0	0	0	0	0	0	0	0	0	0	0
NM_032377	84337	ELOF1 || elongation factor 1 homolog (ELF1, S. cerevisiae) (1)	1.09405	0.707055	0.646274	1.5207	37.9074	87.1572	1	1	1	1	1	1	0	0	0	1	0	-0.2269	-16.38	0	0	0	0	0	0	0	0	0	0	1	0	1	1	0	0	0	0
NM_004870	9526	MPDU1 || mannose-P-dolichol utilization defect 1 (1)	1.09106	0.628542	0.576085	1.45856	43.9702	87.4164	2	0	0	0	0	0	0	0	0	0	0	NA	-17.96	0	0	0	0	0	0	0	0	0	0	0	0	0	0	0	0	0	0
NM_001008491	4735	SE12 || se1in 2 (2)	1.09098	0.616868	0.565425	1.52753	43.9702	87.4229	1	2	1	1	1	0	0	0	0	0	1	-0.472	-18.27	0	0	0	0	0	0	0	0	0	0	1	0	1	0	0	0	0	0
NM_001012	6202	RPS8 || ribosomal protein S8 (3)	1.08771	0.662083	0.608695	1.71183	43.9702	87.7057	0	0	0	0	0	0	0	0	0	0	0	NA	NA	0	0	0	0	0	NA	NA	NA	NA	NA	0	0	0	0	0	0	0	0
NM_024122	79135	MGC4825 || hypothetical protein MGC4825 (3)	1.0867	0.409375	0.376713	1.35664	43.9702	87.7925	0	0	0	0	0	0	0	0	0	0	0	NA	NA	0	0	0	0	0	0	0	0	0	0	0	0	0	0	0	0	0	0
NM_001077497	80742	PRR3 || proline rich 3 (1)	1.08407	0.549542	0.506926	1.41435	43.9702	88.0196	2	1	1	0	0	0	0	0	0	0	1	-0.1421	-22.88	0	0	0	0	0	0	0	0	0	0	0	0	1	0	0	0	0	0
NM_014320	23593	HEBP2 || heme binding protein 2 (1)	1.0836	0.551208	0.508683	1.41784	43.9702	88.0598	0	0	0	0	0	0	0	0	0	0	0	NA	-19.19	0	1	0	0	0	0	0	0	0	0	0	0	0	0	0	0	0	0
NM_001077511	6941	TCF19 || transcri1ion factor 19 (SC1) (1)	1.0825	0.551833	0.509779	1.4582	43.9702	88.1546	0	0	0	0	0	0	0	0	0	0	0	NA	-17.65	0	0	0	0	0	0	0	0	0	0	0	0	0	0	0	0	0	0
NM_020151	56910	STARD7 || START domain containing 7 (2)	1.08048	0.513479	0.475234	1.4885	43.9702	88.3281	1	1	1	1	1	1	0	1	0	1	0	-0.2805	-19.98	0	0	0	0	0	0	0	0	0	0	1	1	1	1	0	0	0	0
NM_020202	56954	NIT2 || nitrilase family, member 2 (3)	1.07783	0.386958	0.359016	1.31393	43.9702	88.5548	0	0	0	0	0	0	0	0	0	0	0	NA	NA	0	0	0	0	0	0	0	0	0	0	0	0	0	0	0	0	0	0
NM_012106	23568	ARL2BP || ADP-ribosylation factor-like 2 binding protein (1)	1.07606	0.472067	0.438701	1.4188	43.9702	88.7064	1	1	0	0	0	0	0	0	0	0	0	NA	-17.41	0	0	0	0	0	0	0	0	0	0	0	0	0	0	0	0	0	0
NM_001431	2037	EPB41L2 || erythrocyte membrane protein band 4.1-like 2 (1)	1.07521	0.516546	0.480415	1.43925	43.9702	88.7789	1	0	0	1	0	0	0	0	0	0	1	-0.054	-21.76	0	0	0	0	0	NA	NA	NA	NA	NA	1	0	0	0	0	0	0	0
NA	337996	RAB42 || RAB42, member RAS homolog family (1)	1.075	0.359	0.333953	1.28692	43.9702	88.7965	NA	NA	NA	NA	NA	0	0	0	0	0	0	NA	NA	NA	NA	NA	NA	NA	NA	NA	NA	NA	NA	NA	NA	NA	NA	NA	NA	NA	NA
NM_173480	126295	LOC126295 || hypothetical protein LOC126295 (1)	1.06976	0.531417	0.496762	1.40357	43.9702	89.2428	0	0	0	0	0	0	0	0	0	0	0	NA	NA	3	1	0	2	0	0	0	0	0	0	0	0	0	0	2	0	0	0
NM_014760	9797	TATDN2 || TatD DNase domain containing 2 (1)	1.06962	0.354333	0.331271	1.27314	43.9702	89.2548	0	0	0	0	0	0	0	0	0	0	0	NA	NA	1	1	1	1	1	0	0	0	0	0	0	0	0	0	1	0	1	0
NM_016310	51728	POLR3K || polymerase (RNA) III (DNA directed) polype1ide K, 12.3 kDa (2)	1.0668	0.519458	0.486931	1.4535	43.9702	89.4939	1	1	1	0	0	0	0	0	0	0	1	-0.1751	-19.4	0	0	0	0	0	NA	NA	NA	NA	NA	0	0	1	0	0	0	0	0
NM_030914	81605	C9orf74 || chromosome 9 open reading frame 74 (1)	1.06539	0.613875	0.576198	1.53693	43.9702	89.6134	0	0	0	0	0	0	0	0	0	0	0	NA	NA	0	0	0	0	0	NA	NA	NA	NA	NA	0	0	0	0	0	0	0	0
NM_000297	5311	PKD2 || polycystic kidney disease 2 (autosomal dominant) (1)	1.06306	0.435708	0.409864	1.36387	43.9702	89.8105	2	0	0	1	0	0	0	0	0	0	1	-0.179	-24.14	1	0	0	1	0	0	0	0	0	0	1	0	0	0	1	0	0	0
NM_015938	51068	NMD3 || NMD3 homolog (S. cerevisiae) (2)	1.06282	0.536208	0.504515	1.4622	43.9702	89.8304	1	1	0	1	0	0	0	0	0	0	1	-0.1454	-19.34	0	0	0	0	0	0	0	0	0	0	1	0	0	0	0	0	0	0
NM_002657	5326	PLAGL2 || pleiomorphic adenoma gene-like 2 (1)	1.06123	0.487875	0.459726	1.42545	43.9702	89.9645	3	0	0	1	0	0	0	0	0	0	1	-0.0085	-17.47	1	0	0	1	0	0	0	0	0	0	1	0	0	0	1	1	0	0
NM_145063	221443	C6orf130 || chromosome 6 open reading frame 130 (1)	1.06081	0.414542	0.39078	1.31931	43.9702	90.0003	1	0	0	1	0	0	0	0	0	0	1	-0.0898	-16.72	0	0	0	0	0	0	0	0	0	0	1	0	0	0	0	0	0	0
NM_000046	411	ARSB || arylsulfatase B (1)	1.06013	0.478127	0.451007	1.44892	43.9702	90.057	0	0	0	0	0	0	0	0	0	0	0	NA	NA	0	0	0	0	0	0	0	0	0	0	0	0	0	0	0	0	0	0
NM_005639	6857	SYT1 || syna1otagmin I (1)	1.05916	0.376367	0.355344	1.31883	43.9702	90.1388	4	0	0	2	0	1	1	1	0	1	0	-0.2096	-20.77	0	0	0	0	0	NA	NA	NA	NA	NA	2	2	0	0	0	0	0	0
NM_001030001	6235	RPS29 || ribosomal protein S29 (2)	1.05514	0.575792	0.545704	1.41868	43.9702	90.4766	0	0	0	0	0	0	0	0	0	0	0	NA	NA	0	0	0	0	0	NA	NA	NA	NA	NA	0	0	0	0	0	0	0	0
NM_033416	92856	IMP4 || IMP4, U3 small nucleolar ribonucleoprotein, homolog (yeast) (1)	1.05329	0.48756	0.462891	1.38136	43.9702	90.6306	0	0	0	0	0	0	0	0	0	0	0	NA	NA	1	0	0	0	0	NA	NA	NA	NA	NA	0	0	0	0	0	0	0	0
NM_018951	3206	HOXA10 || homeo box A10 (3)	1.05182	0.589625	0.560575	1.48326	43.9702	90.7537	0	0	0	0	0	0	0	0	0	0	0	NA	NA	0	0	0	0	0	0	0	0	0	0	0	0	0	0	0	0	0	0
NM_003526	8347	HIST1H2BC || histone 1, H2bc (2)	1.05164	0.471542	0.448389	1.44147	43.9702	90.7692	1	1	1	1	1	0	0	0	0	0	1	NA	NA	0	0	0	0	0	NA	NA	NA	NA	NA	1	0	1	0	0	0	0	0
NM_144726	153830	FLJ31951 || hypothetical protein FLJ31951 (1)	1.05106	0.566833	0.539297	1.43375	43.9702	90.8172	1	2	1	1	1	1	0	1	0	1	0	-0.3399	-16.98	1	0	0	0	0	NA	NA	NA	NA	NA	1	0	1	1	0	0	0	0
NA	389156	na || similar to 60S ribosomal protein L21 (1)	1.04916	0.736208	0.701712	1.47453	43.9702	90.9756	NA	NA	NA	NA	NA	0	0	0	0	0	0	NA	NA	NA	NA	NA	NA	NA	NA	NA	NA	NA	NA	NA	NA	NA	NA	NA	NA	NA	NA
NM_004579	5871	MAP4K2 || mitogen-activated protein kinase kinase kinase kinase 2 (1)	1.04511	0.657917	0.629517	1.51677	43.9702	91.3119	1	0	0	1	0	1	0	0	0	1	0	-0.0924	-18.69	1	0	0	0	0	0	0	0	0	0	1	1	0	0	0	0	0	0
NM_004412	1787	DNMT2 || DNA (cytosine-5-)-methyltransferase 2 (2)	1.04428	0.536708	0.51395	1.40982	43.9702	91.3808	1	1	0	1	0	0	0	0	0	0	1	-0.0762	NA	1	0	0	1	0	NA	NA	NA	NA	NA	1	0	0	0	1	1	0	0
NM_004890	9552	SPAG7 || sperm associated antigen 7 (2)	1.04153	0.943375	0.905756	1.63711	50.0188	91.6082	0	1	0	0	0	0	0	0	0	0	0	NA	NA	0	0	0	0	0	NA	NA	NA	NA	NA	0	0	0	0	0	0	0	0
NM_015577	26064	RAI14 || retinoic acid induced 14 (1)	1.04149	0.657917	0.63171	1.41504	50.0188	91.6121	1	0	0	0	0	0	0	0	0	0	0	NA	NA	1	1	0	1	0	0	0	0	0	0	0	0	0	0	1	0	0	0
NM_012428	27020	SDFR1 || stromal cell derived factor rece1or 1 (2)	1.04101	0.547292	0.52573	1.44742	50.0188	91.6512	1	1	0	0	0	0	0	0	0	0	0	NA	-17.51	0	0	0	0	0	0	0	0	0	0	0	0	0	0	0	0	0	0
NM_015359	23516	SLC39A14 || solute carrier family 39 (zinc transporter), member 14 (1)	1.03876	0.5085	0.489527	1.47182	50.0188	91.8371	2	1	0	0	0	0	0	0	0	0	0	NA	-21.12	0	0	0	0	0	0	0	0	0	0	0	0	0	0	0	0	0	0
NM_006062	10322	SMYD5 || SMYD family member 5 (1)	1.03816	0.381417	0.367398	1.30105	50.0188	91.8864	1	0	0	1	0	0	0	0	0	0	1	-0.0119	-17.68	0	0	0	0	0	NA	NA	NA	NA	NA	1	0	0	0	0	0	0	0
NM_014847	9898	UBAP2L || ubiquitin associated protein 2-like (1)	1.03154	0.438667	0.425252	1.35573	50.0188	92.4288	2	0	0	0	0	0	0	0	0	0	0	NA	-22.64	3	2	1	0	0	NA	NA	NA	NA	NA	0	0	0	0	0	0	1	0
NM_001102576	158511	CSAG1 || chondrosarcoma associated gene 1 (1)	1.03051	0.291042	0.282424	1.22162	50.0188	92.5129	0	0	0	0	0	0	0	0	0	0	0	NA	NA	0	0	0	0	0	0	0	0	0	0	0	0	0	0	0	0	0	0
NM_016091	51386	EIF3S6IP || eukaryotic translation initiation factor 3, subunit 6 interacting protein (3)	1.0276	0.489167	0.476027	1.39709	50.0188	92.75	0	1	0	0	0	0	0	0	0	0	0	NA	NA	1	1	0	0	0	0	0	0	0	0	0	0	0	0	0	0	0	0
NA	56945	1PS22 || mitochondrial ribosomal protein S22 (1)	1.02716	0.533917	0.5198	1.37381	50.0188	92.7863	NA	NA	NA	NA	NA	0	0	0	0	0	0	NA	NA	NA	NA	NA	NA	NA	NA	NA	NA	NA	NA	NA	NA	NA	NA	NA	NA	NA	NA
NM_006352	10472	ZNF238 || zinc finger protein 238 (1)	1.02682	0.580375	0.565216	1.69046	50.0188	92.8137	0	1	0	0	0	0	0	0	0	0	0	NA	-19.26	0	1	0	0	0	0	0	0	0	0	0	0	0	0	0	0	0	0
NM_004461	2193	FARSLA || phenylalanine-tRNA synthetase-like, alpha subunit (1)	1.0268	0.625375	0.609052	1.69908	50.0188	92.8152	0	0	0	0	0	0	0	0	0	0	0	NA	NA	1	0	0	0	0	NA	NA	NA	NA	NA	0	0	0	0	0	0	0	0
NM_001001977	514	ATP5E || ATP synthase, H+ transporting, mitochondrial F1 complex, epsilon subunit (2)	1.02577	0.447042	0.435811	1.35293	50.0188	92.899	1	0	0	1	0	0	0	0	0	0	1	-0.0949	-17.61	0	0	0	0	0	0	0	0	0	0	1	0	0	0	0	0	0	0
NM_024779	79837	PIP5K2C || phosphatidylinositol-4-phosphate 5-kinase, type II, gamma (2)	1.02523	0.38475	0.375282	1.29752	50.0188	92.943	2	0	0	1	0	0	0	0	0	0	1	-0.1361	-18.62	1	0	0	0	0	NA	NA	NA	NA	NA	1	0	0	0	0	0	0	0
NM_003498	8303	SNN || stannin (1)	1.02491	0.500833	0.48866	1.39148	50.0188	92.9687	1	2	1	0	0	0	0	1	0	0	1	0.0029	-26.72	0	0	0	0	0	0	0	0	0	0	0	0	1	0	0	0	0	0
NM_012154	27161	EIF2C2 || eukaryotic translation initiation factor 2C, 2 (1)	1.02457	0.385375	0.376135	1.32222	50.0188	92.9967	0	1	0	0	0	0	0	0	0	0	0	NA	-17.03	2	2	2	1	1	NA	NA	NA	NA	NA	0	0	0	0	1	0	1	0
NM_018346	55316	RSAD1 || radical S-adenosyl methionine domain containing 1 (1)	1.0232	0.453917	0.443624	1.36621	50.0188	93.1072	0	0	0	0	0	0	0	0	0	0	0	NA	-16.39	0	0	0	0	0	0	0	0	0	0	0	0	0	0	0	0	0	0
NM_018159	55190	NUDT11 || nudix (nucleoside diphosphate linked moiety X)-type motif 11 (1)	1.02215	0.445167	0.435519	1.33745	50.0188	93.192	1	1	1	0	0	0	0	0	0	0	1	-0.1517	-16.69	0	0	0	0	0	0	0	0	0	0	0	0	1	0	0	0	0	0
NM_032830	84916	CIRH1A || cirrhosis, autosomal recessive 1A (cirhin) (1)	1.02191	0.347361	0.339912	1.26886	50.0188	93.2113	0	0	0	0	0	0	0	0	0	0	0	NA	NA	1	0	0	0	0	NA	NA	NA	NA	NA	0	0	0	0	0	0	0	0
NM_001003785	10476	ATP5H || ATP synthase, H+ transporting, mitochondrial F0 complex, subunit d (2)	1.02185	0.542935	0.531327	1.40438	50.0188	93.2167	0	1	0	0	0	0	0	0	0	0	0	NA	-17.61	0	0	0	0	0	0	0	0	0	0	0	0	0	0	0	0	0	0
NM_000995	6164	RPL34 || ribosomal protein L34 (2)	1.02168	0.555167	0.543386	1.41803	50.0188	93.2302	0	0	0	0	0	0	0	0	0	0	0	NA	NA	0	0	0	0	0	NA	NA	NA	NA	NA	0	0	0	0	0	0	0	0
NM_005400	5581	PRKCE || protein kinase C, epsilon (1)	1.02067	0.416429	0.407998	1.35701	50.0188	93.3121	3	3	1	2	1	0	0	0	0	0	1	-0.3004	-20.15	0	1	0	0	0	1	0	0	0	0	2	0	1	0	0	0	0	0
NM_022836	64858	DCLRE1B || DNA cross-link repair 1B (PSO2 homolog, S. cerevisiae) (2)	1.01965	0.474833	0.465685	1.39234	50.0188	93.3944	1	0	0	0	0	0	0	0	0	0	0	NA	-18.62	2	0	0	1	0	0	0	0	0	0	0	0	0	0	1	0	0	0
NM_138376	91875	TTC5 || tetratricope1ide repeat domain 5 (1)	1.01928	0.389958	0.38258	1.29426	50.0188	93.4235	0	0	0	0	0	0	0	0	0	0	0	NA	NA	1	1	0	0	0	NA	NA	NA	NA	NA	0	0	0	0	0	0	0	0
NM_033280	90701	SEC11L3 || SEC11-like 3 (S. cerevisiae) (1)	1.01888	0.717552	0.704257	1.5878	50.0188	93.4562	0	0	0	0	0	0	0	0	0	0	0	NA	NA	1	1	1	1	1	0	0	0	0	0	0	0	0	0	1	0	1	1
NM_004711	9145	SYNGR1 || syna1ogyrin 1 (4)	1.01872	0.471333	0.462674	1.36117	50.0188	93.4692	1	0	0	0	0	0	0	0	0	0	0	NA	-16.85	0	0	0	0	0	0	0	0	0	0	0	0	0	0	0	0	0	0
NM_006936	6612	SUMO3 || SMT3 suppressor of mif two 3 homolog 3 (yeast) (1)	1.01862	0.413292	0.405738	1.31435	50.0188	93.4772	0	1	0	0	0	0	0	0	0	0	0	NA	-16.79	0	0	0	0	0	0	0	0	0	0	0	0	0	0	0	0	0	0
NM_174928	221143	LOC221143 || hypothetical protein LOC221143 (1)	1.01793	0.365167	0.358733	1.29695	50.0188	93.5322	1	1	1	0	0	0	0	0	0	0	1	-0.199	-18.69	0	0	0	0	0	0	0	0	0	0	0	0	1	0	0	0	0	0
NM_025250	80727	TTYH3 || tweety homolog 3 (Drosophila) (1)	1.01656	0.417042	0.410248	1.33133	50.0188	93.6425	0	1	0	0	0	0	0	0	0	0	0	NA	-16.42	0	0	0	0	0	0	0	0	0	0	0	0	0	0	0	0	0	0
NM_001005404	388403	YPEL2 || yippee-like 2 (Drosophila) (1)	1.01573	0.48475	0.477243	1.4078	50.0188	93.7092	1	2	1	0	0	1	0	0	0	1	0	-0.1466	-18.25	1	0	0	1	0	0	0	0	0	0	0	0	1	1	1	0	0	0
NM_006331	10436	C2F || C2f protein (1)	1.01477	0.37475	0.369294	1.28546	50.0188	93.7858	0	0	0	0	0	0	0	0	0	0	0	NA	NA	0	0	0	0	0	0	0	0	0	0	0	0	0	0	0	0	0	0
NM_022739	64750	SMURF2 || SMAD specific E3 ubiquitin protein ligase 2 (1)	1.0136	0.40625	0.400798	1.3099	50.0188	93.8795	0	1	0	0	0	0	0	0	0	0	0	NA	-18.67	1	1	1	1	1	0	0	0	0	0	0	0	0	0	1	0	1	1
NM_002646	5287	PIK3C2B || phosphoinositide-3-kinase, class 2, beta polype1ide (1)	1.0123	0.496391	0.490361	1.43739	50.0188	93.9841	2	1	0	1	0	0	0	0	0	0	1	-0.0719	-17.9	0	2	0	0	0	0	0	0	0	0	1	0	0	0	0	0	0	0
NA	8890	EIF2B4 || eukaryotic translation initiation factor 2B, subunit 4 delta, 67kDa (2)	1.0117	0.503375	0.497555	1.39994	50.0188	94.0318	NA	NA	NA	NA	NA	0	0	0	0	0	0	NA	NA	NA	NA	NA	NA	NA	NA	NA	NA	NA	NA	NA	NA	NA	NA	NA	NA	NA	NA
NM_005017	5130	PCYT1A || phosphate cytidylyltransferase 1, choline, alpha isoform (3)	1.01054	0.402479	0.398282	1.32992	50.0188	94.1244	0	0	0	0	0	0	0	0	0	0	0	NA	NA	0	0	0	0	0	0	0	0	0	0	0	0	0	0	0	0	0	0
NA	85028	C1orf79 || chromosome 1 open reading frame 79 (4)	1.01051	0.599833	0.593594	1.52104	50.0188	94.1265	NA	NA	NA	NA	NA	0	0	0	0	0	0	NA	NA	NA	NA	NA	NA	NA	NA	NA	NA	NA	NA	NA	NA	NA	NA	NA	NA	NA	NA
NM_012478	23558	WBP2 || WW domain binding protein 2 (2)	1.01033	0.536458	0.530974	1.49574	50.0188	94.1411	2	2	1	1	0	0	0	0	0	0	1	0.0257	-16.64	0	1	0	0	0	0	0	0	0	0	1	0	1	0	0	0	0	0
NA	121053	MGC40397 || hypothetical protein MGC40397 (1)	1.00987	0.633958	0.627763	1.55301	50.0188	94.1777	NA	NA	NA	NA	NA	0	0	0	0	0	0	NA	NA	NA	NA	NA	NA	NA	NA	NA	NA	NA	NA	NA	NA	NA	NA	NA	NA	NA	NA
NM_001017423	5832	ALDH18A1 || aldehyde dehydrogenase 18 family, member A1 (1)	1.00894	0.406875	0.403269	1.33737	50.0188	94.2516	1	0	0	1	0	0	0	0	0	0	1	-0.1198	-16.75	1	0	0	1	0	0	0	0	0	0	1	0	0	0	1	0	0	0
NA	90271	C10orf75 || chromosome 10 open reading frame 75 (2)	1.00889	0.630192	0.624636	1.41412	50.0188	94.2553	NA	NA	NA	NA	NA	0	0	0	0	0	0	NA	NA	NA	NA	NA	NA	NA	NA	NA	NA	NA	NA	NA	NA	NA	NA	NA	NA	NA	NA
NA	285398	LOC285398 || hypothetical locus LOC285398 (1)	1.00801	0.481492	0.477665	1.37788	50.0188	94.3254	NA	NA	NA	NA	NA	0	0	0	0	0	0	NA	NA	NA	NA	NA	NA	NA	NA	NA	NA	NA	NA	NA	NA	NA	NA	NA	NA	NA	NA
NA	131691	na || similar to pe1idylprolyl isomerase A (1)	1.00692	0.493117	0.489728	1.46001	50.0188	94.4122	NA	NA	NA	NA	NA	0	0	0	0	0	0	NA	NA	NA	NA	NA	NA	NA	NA	NA	NA	NA	NA	NA	NA	NA	NA	NA	NA	NA	NA
NM_015459	25923	DKFZP564J0863 || DKFZP564J0863 protein (3)	1.00453	0.417583	0.4157	1.34436	50.0188	94.6014	0	0	0	0	0	0	0	0	0	0	0	NA	NA	1	4	1	0	0	0	0	0	0	0	0	0	0	0	0	0	1	0
NM_006178	4905	NSF || N-ethylmaleimide-sensitive factor (1)	1.00382	0.321417	0.320192	1.24652	50.0188	94.6573	1	0	0	1	0	1	0	0	0	1	0	-0.1286	NA	0	1	0	0	0	0	0	0	0	0	1	0	0	0	0	0	0	0
NM_005737	10123	ARL7 || ADP-ribosylation factor-like 7 (2)	1.00368	0.42975	0.428175	1.35349	50.0188	94.6689	0	0	0	0	0	0	0	0	0	0	0	NA	-19.31	0	0	0	0	0	0	0	0	0	0	0	0	0	0	0	0	0	0
NM_018358	55324	ABCF3 || ATP-binding cassette, sub-family F (GCN20), member 3 (1)	1.00107	0.514542	0.513992	1.36951	50.0188	94.8746	0	0	0	0	0	0	0	0	0	0	0	NA	NA	0	1	0	0	0	0	0	0	0	0	0	0	0	0	0	0	0	0
NM_170746	280636	C11orf31 || chromosome 11 open reading frame 31 (3)	1.0009	0.455583	0.455172	1.35053	50.0188	94.8878	0	0	0	0	0	0	0	0	0	0	0	NA	NA	0	0	0	0	0	0	0	0	0	0	0	0	0	0	0	0	0	0
NM_015271	23321	TRIM2 || tripartite motif-containing 2 (1)	1.00043	0.436625	0.436439	1.34105	50.0188	94.9254	2	6	2	1	1	1	1	0	1	1	0	-0.5836	-21.01	2	2	1	1	0	0	0	0	0	0	1	1	2	2	1	0	1	0
NM_002149	3241	HPCAL1 || hippocalcin-like 1 (2)	0.99935	0.421042	0.421315	1.32756	50.0188	95.01	1	1	1	0	0	0	0	0	0	0	1	-0.0318	NA	0	0	0	0	0	0	0	0	0	0	0	0	1	0	0	0	0	0
NM_017919	55014	STX17 || syntaxin 17 (1)	0.997922	0.568963	0.570147	1.48708	50.0188	95.1221	0	2	0	0	0	0	0	0	0	0	0	NA	-22.4	0	0	0	0	0	0	0	0	0	0	2	0	2	0	0	0	0	0
NA	96610	LOC96610 || hypothetical protein similar to KIAA0187 gene product (1)	0.996167	0.476708	0.478543	1.487	50.0188	95.2596	NA	NA	NA	NA	NA	0	0	0	0	0	0	NA	NA	NA	NA	NA	NA	NA	NA	NA	NA	NA	NA	NA	NA	NA	NA	NA	NA	NA	NA
NM_003223	7023	TFAP4 || transcri1ion factor AP-4 (activating enhancer binding protein 4) (1)	0.996114	0.484333	0.486223	1.37059	50.0188	95.2637	0	0	0	0	0	0	0	0	0	0	0	NA	NA	1	1	1	1	1	0	0	0	0	0	0	0	0	0	1	1	1	1
NA	84233	DKFZp586C1924 || hypothetical protein DKFZp586C1924 (1)	0.993595	0.4695	0.472526	1.34042	50.0188	95.4606	NA	NA	NA	NA	NA	0	0	0	0	0	0	NA	NA	NA	NA	NA	NA	NA	NA	NA	NA	NA	NA	NA	NA	NA	NA	NA	NA	NA	NA
NM_004313	409	ARRB2 || arrestin, beta 2 (1)	0.992266	0.606625	0.611353	1.55299	50.0188	95.5642	1	0	0	0	0	0	0	0	0	0	0	NA	-17.75	0	1	0	0	0	0	0	0	0	0	0	0	0	0	0	0	0	0
NM_001642	334	APLP2 || amyloid beta (A4) precursor-like protein 2 (2)	0.992043	0.50475	0.508798	1.38285	50.0188	95.5815	0	2	0	0	0	0	0	0	0	0	0	NA	-17.69	0	1	0	0	0	0	0	0	0	0	0	0	0	0	0	0	0	0
NM_001003805	27109	ATP5S || ATP synthase, H+ transporting, mitochondrial F0 complex, subunit s (factor B) (1)	0.991132	0.372292	0.375623	1.2986	50.0188	95.6524	0	0	0	0	0	0	0	0	0	0	0	NA	NA	0	0	0	0	0	0	0	0	0	0	0	0	0	0	0	0	0	0
NM_006290	7128	TNFAIP3 || tumor necrosis factor, alpha-induced protein 3 (1)	0.990739	0.477338	0.4818	1.39294	50.0188	95.6829	1	0	0	1	0	0	0	0	0	0	1	0.0788	-16.61	1	0	0	0	0	0	0	0	0	0	1	0	0	0	0	0	0	0
NM_032826	84912	SLC35B4 || solute carrier family 35, member B4 (2)	0.990518	0.477667	0.482239	1.37007	50.0188	95.7001	8	4	2	5	2	0	0	0	0	0	1	-0.4233	-21.19	0	0	0	0	0	0	0	0	0	0	5	0	2	0	0	0	0	0
NM_006773	8886	DDX18 || DEAD (Asp-Glu-Ala-Asp) box polype1ide 18 (3)	0.990513	0.374062	0.377645	1.30692	50.0188	95.7005	1	1	1	1	1	0	0	0	0	0	1	-0.3984	-17.46	2	4	2	0	0	0	0	0	0	0	1	0	1	0	0	0	2	1
NM_213649	119559	SFXN4 || sideroflexin 4 (1)	0.990481	0.451417	0.455755	1.37797	50.0188	95.703	0	0	0	0	0	0	0	0	0	0	0	NA	NA	1	0	0	1	0	NA	NA	NA	NA	NA	0	0	0	0	1	0	0	0
NM_001153	307	ANXA4 || annexin A4 (1)	0.990282	0.519833	0.524935	1.52208	50.0188	95.7184	1	2	1	1	1	1	0	0	0	1	0	-0.464	-25.11	0	1	0	0	0	0	0	0	0	0	1	0	1	1	0	0	0	0
NM_013339	29929	ALG6 || asparagine-linked glycosylation 6 homolog (yeast, alpha-1,3-glucosyltransferase) (1)	0.990259	0.336149	0.339455	1.26099	50.0188	95.7202	0	0	0	0	0	0	0	0	0	0	0	NA	NA	0	0	0	0	0	0	0	0	0	0	0	0	0	0	0	0	0	0
NM_000551	7428	VHL || von Hippel-Lindau tumor suppressor (1)	0.990072	0.548083	0.553579	1.43057	50.0188	95.7347	1	2	1	0	0	0	0	0	0	0	1	-0.1449	-20.59	0	0	0	0	0	0	0	0	0	0	0	0	1	0	0	0	0	0
NM_016626	51320	RKHD2 || ring finger and KH domain containing 2 (1)	0.98923	0.518917	0.524566	1.37567	50.0188	95.8001	1	1	1	1	1	1	0	1	0	1	0	-0.3372	NA	0	0	0	0	0	NA	NA	NA	NA	NA	1	1	1	1	0	0	0	0
NM_020447	57184	C15orf17 || chromosome 15 open reading frame 17 (1)	0.988262	0.380375	0.384893	1.29703	50.0188	95.8751	0	1	0	0	0	0	0	0	0	0	0	NA	NA	0	0	0	0	0	0	0	0	0	0	0	0	0	0	0	0	0	0
NM_005466	10001	MED6 || mediator of RNA polymerase II transcri1ion, subunit 6 homolog (yeast) (1)	0.988232	0.493917	0.499798	1.40805	50.0188	95.8774	0	0	0	0	0	0	0	0	0	0	0	NA	NA	0	0	0	0	0	NA	NA	NA	NA	NA	0	0	0	0	0	0	0	0
NM_018270	55257	C20orf20 || chromosome 20 open reading frame 20 (1)	0.988217	0.372042	0.376478	1.31217	50.0188	95.8786	0	0	0	0	0	0	0	0	0	0	0	NA	NA	1	0	0	0	0	NA	NA	NA	NA	NA	0	0	0	0	0	0	0	0
NA	283267	LOC283267 || hypothetical protein LOC283267 (1)	0.987067	0.392042	0.397178	1.32234	50.0188	95.9675	NA	NA	NA	NA	NA	0	0	0	0	0	0	NA	NA	NA	NA	NA	NA	NA	NA	NA	NA	NA	NA	NA	NA	NA	NA	NA	NA	NA	NA
NA	145853	LOC145853 || hypothetical LOC145853 (1)	0.982512	0.428708	0.436339	1.37389	55.4077	96.3186	NA	NA	NA	NA	NA	0	0	0	0	0	0	NA	NA	NA	NA	NA	NA	NA	NA	NA	NA	NA	NA	NA	NA	NA	NA	NA	NA	NA	NA
NM_000965	5915	RARB || retinoic acid rece1or, beta (1)	0.98082	0.578192	0.589498	1.65846	55.4077	96.4484	1	1	1	0	0	1	1	0	0	1	0	-0.3027	-25.29	0	0	0	0	0	0	1	0	0	0	0	0	1	1	0	0	0	0
NM_017840	54948	1PL16 || mitochondrial ribosomal protein L16 (1)	0.980472	0.48225	0.491855	1.35524	55.4077	96.4751	0	0	0	0	0	0	0	0	0	0	0	NA	NA	1	0	0	0	0	0	0	0	0	0	0	0	0	0	0	0	0	0
NM_080764	140883	SUHW2 || suppressor of hairy wing homolog 2 (Drosophila) (1)	0.97991	0.339581	0.346543	1.26074	55.4077	96.5181	2	2	0	0	0	0	0	0	0	0	0	NA	-18.04	0	1	0	0	0	0	0	0	0	0	0	0	0	0	0	0	0	0
NA	137107	na || similar to ribosomal protein L10a (1)	0.979671	0.468283	0.478001	1.35871	55.4077	96.5364	NA	NA	NA	NA	NA	0	0	0	0	0	0	NA	NA	NA	NA	NA	NA	NA	NA	NA	NA	NA	NA	NA	NA	NA	NA	NA	NA	NA	NA
NM_001008660	8301	PICALM || phosphatidylinositol binding clathrin assembly protein (1)	0.978367	0.530167	0.541889	1.41239	55.4077	96.6361	1	1	1	0	0	1	0	0	0	1	0	-0.2209	-18	0	0	0	0	0	0	0	0	0	0	0	0	1	1	0	0	0	0
NA	442232	na || similar to Ac2-210 (1)	0.978042	0.797808	0.81572	1.59277	55.4077	96.6609	NA	NA	NA	NA	NA	0	0	0	0	0	0	NA	NA	NA	NA	NA	NA	NA	NA	NA	NA	NA	NA	NA	NA	NA	NA	NA	NA	NA	NA
NM_017907	55004	FLJ20625 || hypothetical protein FLJ20625 (1)	0.977663	0.572042	0.585111	1.41849	55.4077	96.6898	0	0	0	0	0	0	0	0	0	0	0	NA	NA	0	0	0	0	0	0	0	0	0	0	0	0	0	0	0	0	0	0
NM_018060	55699	IARS2 || isoleucine-tRNA synthetase 2, mitochondrial (1)	0.976145	0.517458	0.530104	1.36287	55.4077	96.8056	0	0	0	0	0	0	0	0	0	0	0	NA	NA	0	0	0	0	0	0	0	0	0	0	0	0	0	0	0	0	0	0
NM_004842	9465	AKAP7 || A kinase (PRKA) anchor protein 7 (2)	0.975978	0.464521	0.475954	1.37213	55.4077	96.8183	0	0	0	0	0	0	0	0	0	0	0	NA	NA	0	0	0	0	0	0	0	0	0	0	0	0	0	0	0	0	0	0
NM_181307	122704	1PL52 || mitochondrial ribosomal protein L52 (2)	0.975859	0.440708	0.451611	1.32981	55.4077	96.8273	1	0	0	1	0	0	0	0	0	0	1	-0.0965	-17.85	0	0	0	0	0	NA	NA	NA	NA	NA	1	0	0	0	0	0	0	0
NM_016406	51506	UFC1 || ubiquitin-fold modifier conjugating enzyme 1 (1)	0.975509	0.516875	0.529851	1.39162	55.4077	96.8539	0	0	0	0	0	0	0	0	0	0	0	NA	NA	1	1	1	0	0	0	1	0	0	0	0	0	0	0	0	0	1	0
NM_020967	57727	NCOA5 || nuclear rece1or coactivator 5 (1)	0.974112	0.31975	0.328248	1.24446	55.4077	96.9601	0	0	0	0	0	0	0	0	0	0	0	NA	NA	0	1	0	0	0	0	0	0	0	0	0	0	0	0	0	0	0	0
NM_015026	23041	KIAA1040 || KIAA1040 protein (1)	0.972848	0.366787	0.377025	1.31754	55.4077	97.056	1	1	1	1	1	0	0	1	0	1	0	-0.4429	-22.7	3	1	0	3	0	0	0	0	0	0	1	1	1	1	3	0	0	0
NM_002748	5597	MAPK6 || mitogen-activated protein kinase 6 (1)	0.972826	0.437667	0.449892	1.36611	55.4077	97.0576	0	1	0	0	0	0	0	1	0	0	0	NA	-18.46	0	1	0	0	0	1	0	0	0	0	0	0	0	0	0	0	0	0
NM_001098721	2786	GNG4 || guanine nucleotide binding protein (G protein), gamma 4 (1)	0.972764	0.442875	0.455275	1.33895	55.4077	97.0624	0	3	0	0	0	0	0	0	0	0	0	NA	-20.11	1	0	0	1	0	0	0	0	0	0	0	0	0	0	1	0	0	0
NM_017902	55662	HIF1AN || hypoxia-inducible factor 1, alpha subunit inhibitor (1)	0.972485	0.353708	0.363716	1.2673	55.4077	97.0835	1	1	1	1	1	0	0	0	0	0	0	NA	-17.37	1	0	0	0	0	0	0	0	0	0	1	0	1	0	0	0	0	0
NM_012426	23450	SF3B3 || splicing factor 3b, subunit 3, 130kDa (1)	0.972313	0.419917	0.431874	1.41507	55.4077	97.0965	1	0	0	0	0	0	0	0	0	0	0	NA	-17.34	2	1	0	1	0	0	0	0	0	0	0	0	0	0	NA	NA	NA	NA
NM_019063	27436	EML4 || echinoderm microtubule associated protein like 4 (1)	0.971238	0.457292	0.470834	1.32954	55.4077	97.1778	3	1	0	1	0	1	1	0	1	1	0	-0.0386	-19.9	3	2	2	2	2	0	0	0	0	0	1	1	0	0	2	0	2	0
NM_146388	51073	1PL4 || mitochondrial ribosomal protein L4 (1)	0.968381	0.664298	0.685988	1.43533	55.4077	97.3934	2	0	0	1	0	0	0	0	0	0	1	0.0168	-17.52	0	0	0	0	0	0	0	0	0	0	1	0	0	0	0	0	0	0
NM_000404	2720	GLB1 || galactosidase, beta 1 (1)	0.965655	0.433917	0.44935	1.36352	55.4077	97.5982	0	0	0	0	0	0	0	0	0	0	0	NA	-16.55	2	2	1	0	0	0	0	0	0	0	0	0	0	0	0	0	1	0
NM_016071	51650	1PS33 || mitochondrial ribosomal protein S33 (3)	0.965378	0.402687	0.417129	1.32573	55.4077	97.6189	0	1	0	0	0	0	0	0	0	0	0	NA	-18.12	0	0	0	0	0	0	0	0	0	0	0	0	0	0	0	0	0	0
NM_005243	2130	EWSR1 || Ewing sarcoma breakpoint region 1 (3)	0.964401	0.356167	0.369314	1.26612	55.4077	97.6921	0	0	0	0	0	0	0	0	0	0	0	NA	NA	1	0	0	0	0	0	0	0	0	0	0	0	0	0	0	0	0	0
NM_032936	85025	C7orf35 || chromosome 7 open reading frame 35 (1)	0.963463	0.386625	0.401287	1.2866	55.4077	97.7622	0	0	0	0	0	0	0	0	0	0	0	NA	NA	2	0	0	1	0	0	0	0	0	0	0	0	0	0	1	0	0	0
NM_001005339	6001	RGS10 || regulator of G-protein signalling 10 (1)	0.962318	0.461187	0.479246	1.34816	55.4077	97.8477	0	0	0	0	0	0	0	0	0	0	0	NA	NA	0	0	0	0	0	0	0	0	0	0	0	0	0	0	0	0	0	0
NM_031455	83643	CCDC3 || coiled-coil domain containing 3 (1)	0.962252	0.498508	0.518064	1.38133	55.4077	97.8527	2	0	0	2	0	0	0	0	0	0	1	0.0408	-20.19	0	0	0	0	0	0	0	0	0	0	2	0	0	0	0	0	0	0
NM_000945	5534	PPP3R1 || protein phosphatase 3 (formerly 2B), regulatory subunit B, 19kDa, alpha isoform (calcineurin B, type I) (1)	0.961462	0.505208	0.525459	1.4063	55.4077	97.9116	0	0	0	0	0	0	0	0	0	0	0	NA	NA	0	0	0	0	0	0	0	0	0	0	0	0	0	0	0	0	0	0
NM_006855	11015	KDELR3 || KDEL (Lys-Asp-Glu-Leu) endoplasmic reticulum protein retention rece1or 3 (3)	0.960481	0.362396	0.377307	1.27913	55.4077	97.9846	0	0	0	0	0	0	0	0	0	0	0	NA	NA	1	1	1	0	0	0	0	0	0	0	0	0	0	0	0	0	1	0
NM_003367	7392	USF2 || upstream transcri1ion factor 2, c-fos interacting (2)	0.960151	0.661042	0.688477	1.43893	55.4077	98.0091	0	0	0	0	0	0	0	0	0	0	0	NA	NA	1	0	0	1	0	0	0	0	0	0	0	0	0	0	1	1	0	0
NM_001829	1182	CLCN3 || chloride channel 3 (3)	0.960095	0.371042	0.386463	1.31697	55.4077	98.0133	1	1	1	1	1	1	1	0	1	1	0	-0.3764	NA	1	1	1	0	0	0	0	0	0	0	1	1	1	1	0	0	1	0
NM_001003897	63905	MANBAL || mannosidase, beta A, lysosomal-like (1)	0.959671	0.499125	0.5201	1.40701	55.4077	98.0448	2	0	0	1	0	0	0	0	0	0	1	0.0176	-17.11	1	0	0	0	0	0	0	0	0	0	1	0	0	0	0	0	0	0
NM_001247	955	ENTPD6 || ectonucleoside triphosphate diphosphohydrolase 6 (putative function) (2)	0.958396	0.694546	0.724696	1.4499	55.4077	98.1395	0	0	0	0	0	0	0	0	0	0	0	NA	NA	1	1	1	0	0	0	0	0	0	0	0	0	0	0	0	0	1	1
NM_001080401	147699	FLJ40125 || hypothetical protein FLJ40125 (1)	0.957841	0.49975	0.521746	1.35831	55.4077	98.1806	0	0	0	0	0	0	0	0	0	0	0	NA	NA	0	0	0	0	0	NA	NA	NA	NA	NA	0	0	0	0	0	0	0	0
NM_033088	85369	FAM40A || family with sequence similarity 40, member A (1)	0.956759	0.45725	0.477916	1.33849	55.4077	98.2607	0	0	0	0	0	0	0	0	0	0	0	NA	NA	1	0	0	0	0	NA	NA	NA	NA	NA	0	0	0	0	0	0	0	0
NM_001098786	29923	HIG2 || hypoxia-inducible protein 2 (1)	0.956145	0.491667	0.514217	1.3799	55.4077	98.306	1	0	0	0	0	0	0	0	0	0	0	NA	-16.55	0	0	0	0	0	0	0	0	0	0	0	0	0	0	0	0	0	0
NM_001019	6210	RPS15A || ribosomal protein S15a (1)	0.955638	0.474524	0.496553	1.40429	55.4077	98.3436	0	0	0	0	0	0	0	0	0	0	0	NA	NA	0	0	0	0	0	0	0	0	0	0	0	0	0	0	0	0	0	0
NM_052861	92070	MGC21675 || hypothetical protein MGC21675 (1)	0.955465	0.380811	0.398561	1.29953	55.4077	98.3563	0	0	0	0	0	0	0	0	0	0	0	NA	-19.55	0	0	0	0	0	0	0	0	0	0	0	0	0	0	0	0	0	0
NA	388734	na || similar to Px19-like protein (25 kDa protein of relevant evolutionary and lymphoid interest) (PRELI) (CGI-106) (SBBI12) (1)	0.955097	0.490796	0.51387	1.37545	55.4077	98.3834	NA	NA	NA	NA	NA	0	0	0	0	0	0	NA	NA	NA	NA	NA	NA	NA	NA	NA	NA	NA	NA	NA	NA	NA	NA	NA	NA	NA	NA
NM_031216	81929	SEH1L || SEH1-like (S. cerevisiae) (1)	0.953144	0.415375	0.435794	1.33237	55.4077	98.5273	2	0	0	1	0	0	0	0	0	0	0	NA	-19.24	1	0	0	0	0	0	0	0	0	0	1	0	0	0	0	0	0	0
NM_001167	331	BIRC4 || baculoviral IAP repeat-containing 4 (1)	0.95306	0.480167	0.503816	1.45868	55.4077	98.5335	1	0	0	1	0	0	0	0	0	0	1	0.0757	-19.69	0	0	0	0	0	0	0	0	0	0	1	0	0	0	0	0	0	0
NM_030768	80895	ILKAP || integrin-linked kinase-associated serine/threonine phosphatase 2C (1)	0.949522	0.50225	0.52895	1.5507	55.4077	98.7929	0	0	0	0	0	0	0	0	0	0	0	NA	NA	0	1	0	0	0	0	0	0	0	0	0	0	0	0	0	0	0	0
NM_003756	8667	EIF3S3 || eukaryotic translation initiation factor 3, subunit 3 gamma, 40kDa (1)	0.948558	0.45176	0.47626	1.37041	55.4077	98.8634	0	0	0	0	0	0	0	0	0	0	0	NA	NA	0	0	0	0	0	NA	NA	NA	NA	NA	0	0	0	0	0	0	0	0
NA	388132	dJ612B15.1 || similar to dJ612B15.1 (novel protein similar to 60S ribosomal protein L17 (RPL17)) (1)	0.947971	0.684563	0.722135	1.56369	55.4077	98.9062	NA	NA	NA	NA	NA	0	0	0	0	0	0	NA	NA	NA	NA	NA	NA	NA	NA	NA	NA	NA	NA	NA	NA	NA	NA	NA	NA	NA	NA
NM_139177	201266	SLC39A11 || solute carrier family 39 (metal ion transporter), member 11 (1)	0.946559	0.436261	0.460892	1.35653	55.4077	99.0091	0	2	0	0	0	0	0	1	0	0	0	NA	-17.97	0	0	0	0	0	0	0	0	0	0	0	0	0	0	0	0	0	0
NM_018000	55686	DSU || dilute suppressor (1)	0.946104	0.657042	0.694471	2.10088	55.4077	99.0422	0	1	0	0	0	0	0	0	0	0	0	NA	NA	0	0	0	0	0	0	0	0	0	0	0	0	0	0	0	0	0	0
NM_001861	1327	COX4I1 || cytochrome c oxidase subunit IV isoform 1 (1)	0.944958	0.47238	0.499895	1.35476	55.4077	99.1255	0	0	0	0	0	0	0	0	0	0	0	NA	NA	0	0	0	0	0	0	0	0	0	0	0	0	0	0	0	0	0	0
NM_004645	8161	COIL || coilin (1)	0.941997	0.477875	0.5073	1.3272	55.4077	99.3399	1	1	1	0	0	0	0	0	0	0	1	-0.1792	-17.47	0	0	0	0	0	NA	NA	NA	NA	NA	0	0	1	0	0	0	0	0
NM_032015	79102	RNF26 || ring finger protein 26 (1)	0.941488	0.425844	0.452309	1.31344	55.4077	99.3767	1	0	0	0	0	0	0	0	0	0	0	NA	-18.8	0	0	0	0	0	1	0	0	1	0	0	0	0	0	0	0	0	0
NM_020963	4343	MOV10 || Mov10, Moloney leukemia virus 10, homolog (mouse) (1)	0.940539	0.402458	0.427902	1.31306	55.4077	99.4451	1	0	0	1	0	0	0	0	0	0	1	0.0004	-16.67	1	2	1	0	0	0	0	0	0	0	1	0	0	0	0	0	1	0
NM_004231	9296	ATP6V1F || ATPase, H+ transporting, lysosomal 14kDa, V1 subunit F (2)	0.940329	0.342733	0.364482	1.26478	55.4077	99.4603	0	0	0	0	0	0	0	0	0	0	0	NA	NA	0	0	0	0	0	0	0	0	0	0	0	0	0	0	0	0	0	0
NM_004911	9601	PDIA4 || protein disulfide isomerase-associated 4 (1)	0.939298	0.354125	0.37701	1.28824	55.4077	99.5345	0	0	0	0	0	0	0	0	0	0	0	NA	NA	1	0	0	0	0	0	0	0	0	0	0	0	0	0	0	0	0	0
NM_006667	10857	PGRMC1 || progesterone rece1or membrane component 1 (1)	0.937689	0.509029	0.542855	1.35913	55.4077	99.6501	0	1	0	0	0	0	0	0	0	0	0	NA	NA	0	0	0	0	0	0	0	0	0	0	0	0	0	0	0	0	0	0
NM_001101	60	ACTB || actin, beta (9)	0.936531	0.475879	0.50813	1.34326	55.4077	99.7331	1	0	0	1	0	0	0	0	0	0	1	-0.1496	-19.37	0	0	0	0	0	0	0	0	0	0	1	0	0	0	0	0	0	0
NA	146517	LOC146517 || hypothetical protein LOC146517 (1)	0.935978	0.385583	0.411958	1.28801	55.4077	99.7726	NA	NA	NA	NA	NA	0	0	0	0	0	0	NA	NA	NA	NA	NA	NA	NA	NA	NA	NA	NA	NA	NA	NA	NA	NA	NA	NA	NA	NA
NM_006023	8872	C10orf7 || chromosome 10 open reading frame 7 (2)	0.935108	0.48195	0.515395	1.4371	55.4077	99.8348	0	1	0	0	0	0	0	0	0	0	0	NA	NA	0	1	0	0	0	0	0	0	0	0	0	0	0	0	0	0	0	0
NM_058246	10049	DNAJB6 || DnaJ (Hsp40) homolog, subfamily B, member 6 (4)	0.93376	0.476	0.509767	1.48111	55.4077	99.931	1	1	0	0	0	0	0	0	0	0	0	NA	-17.26	1	1	1	0	0	1	0	0	1	0	0	0	0	0	0	0	1	0
NA	220906	LOC220906 || hypothetical protein LOC220906 (2)	0.932868	0.371167	0.397877	1.2887	55.4077	99.9945	NA	NA	NA	NA	NA	0	0	0	0	0	0	NA	NA	NA	NA	NA	NA	NA	NA	NA	NA	NA	NA	NA	NA	NA	NA	NA	NA	NA	NA
NM_018448	55832	CAND1 || cullin-associated and neddylation-dissociated 1 (1)	0.930007	0.405713	0.436247	1.3322	61.9432	100	2	1	1	0	0	0	0	0	0	0	1	-0.2583	-23.31	3	1	1	1	0	0	0	0	0	0	0	0	1	0	1	1	1	1
NM_198705	374875	SCDR10 || short-chain dehydrogenase/reductase 10 (1)	0.928615	0.486312	0.523697	1.38073	61.9432	100	1	0	0	1	0	0	0	0	0	0	1	-0.1052	-18.06	0	0	0	0	0	0	0	0	0	0	1	0	0	0	0	0	0	0
NA	5380	PMS2L2 || postmeiotic segregation increased 2-like 2 (1)	0.928584	0.385125	0.414744	1.37174	61.9432	100	NA	NA	NA	NA	NA	0	0	0	0	0	0	NA	NA	NA	NA	NA	NA	NA	NA	NA	NA	NA	NA	NA	NA	NA	NA	NA	NA	NA	NA
NM_014230	6730	SRP68 || signal recognition particle 68kDa (1)	0.928224	0.369875	0.398476	1.28249	61.9432	100	1	0	0	0	0	0	0	0	0	0	0	NA	-19.89	1	1	0	0	0	NA	NA	NA	NA	NA	0	0	0	0	0	0	0	0
NM_001015885	8480	RAE1 || RAE1 RNA export 1 homolog (S. pombe) (1)	0.925645	0.490375	0.529765	1.3868	61.9432	100	1	0	0	1	0	0	0	0	0	0	1	-0.0373	-16.48	1	0	0	1	0	0	0	0	0	0	1	0	0	0	1	0	0	0
NM_001080791	90416	MGC20481 || hypothetical protein MGC20481 (1)	0.924116	0.431417	0.466842	1.3368	61.9432	100	1	1	0	0	0	0	0	0	0	0	0	NA	-17.2	0	0	0	0	0	0	0	0	0	0	0	0	0	0	0	0	0	0
NM_020470	10897	YIF1 || Yip1 interacting factor homolog (S. cerevisiae) (2)	0.923858	0.416167	0.450467	1.30119	61.9432	100	0	0	0	0	0	0	0	0	0	0	0	NA	NA	0	0	0	0	0	0	0	0	0	0	0	0	0	0	0	0	0	0
NM_014038	28969	BZW2 || basic leucine zipper and W2 domains 2 (1)	0.92269	0.401979	0.43566	1.31085	61.9432	100	0	0	0	0	0	0	0	0	0	0	0	NA	NA	0	0	0	0	0	0	0	0	0	0	0	0	0	0	0	0	0	0
NM_015463	25927	C2orf32 || chromosome 2 open reading frame 32 (1)	0.921688	0.409542	0.444339	1.35268	61.9432	100	1	0	0	1	0	0	0	0	0	0	1	-0.0782	-17.39	0	0	0	0	0	0	0	0	0	0	1	0	0	0	0	0	0	0
NM_053001	116039	OSR2 || odd-skipped related 2 (Drosophila) (1)	0.921276	0.336833	0.365616	1.25233	61.9432	100	0	0	0	0	0	0	0	0	0	0	0	NA	NA	1	0	0	1	0	0	0	0	0	0	0	0	0	0	1	1	0	0
NA	389835	MGC57827 || Similar to RIKEN cDNA 2700049P18 gene (1)	0.920688	0.431745	0.468938	1.38803	61.9432	100	NA	NA	NA	NA	NA	0	0	0	0	0	0	NA	NA	NA	NA	NA	NA	NA	NA	NA	NA	NA	NA	NA	NA	NA	NA	NA	NA	NA	NA
NM_002915	5983	RFC3 || replication factor C (activator 1) 3, 38kDa (4)	0.920657	0.406917	0.441985	1.30074	61.9432	100	0	0	0	0	0	0	0	0	0	0	0	NA	NA	0	0	0	0	0	0	0	0	0	0	0	0	0	0	0	0	0	0
NM_000775	1573	CYP2J2 || cytochrome P450, family 2, subfamily J, polype1ide 2 (1)	0.920491	0.362063	0.393336	1.26798	61.9432	100	0	0	0	0	0	0	0	0	0	0	0	NA	NA	0	1	0	0	0	NA	NA	NA	NA	NA	0	0	0	0	0	0	0	0
NM_014874	9927	MFN2 || mitofusin 2 (1)	0.919613	0.770125	0.837445	1.47833	61.9432	100	0	0	0	0	0	0	0	0	0	0	0	NA	NA	0	0	0	0	0	0	0	0	0	0	0	0	0	0	0	0	0	0
NM_194272	348093	RBPMS2 || RNA binding protein with multiple splicing 2 (1)	0.918416	0.35774	0.389518	1.2806	61.9432	100	0	0	0	0	0	0	0	0	0	0	0	NA	NA	0	0	0	0	0	0	0	0	0	0	0	0	0	0	0	0	0	0
NM_005973	5546	PRCC || papillary renal cell carcinoma (translocation-associated) (2)	0.916939	0.348662	0.380246	1.27227	61.9432	100	0	1	0	0	0	0	0	0	0	0	0	NA	NA	0	0	0	0	0	0	0	0	0	0	0	0	0	0	0	0	0	0
NM_004463	2245	FGD1 || FYVE, RhoGEF and PH domain containing 1 (faciogenital dysplasia) (1)	0.914766	0.540667	0.591043	1.48419	61.9432	100	0	0	0	0	0	0	0	0	0	0	0	NA	-21.18	0	0	0	0	0	0	0	0	0	0	0	0	0	0	0	0	0	0
NM_014517	7342	UBP1 || upstream binding protein 1 (LBP-1a) (1)	0.913934	0.337167	0.368918	1.28585	61.9432	100	1	1	0	0	0	0	0	0	0	0	0	NA	-19.21	0	1	0	0	0	0	0	0	0	0	0	0	0	0	0	0	0	0
NA	341457	na || similar to pe1idyl-Pro cis trans isomerase (1)	0.912999	0.402254	0.440585	1.30924	61.9432	100	NA	NA	NA	NA	NA	0	0	0	0	0	0	NA	NA	NA	NA	NA	NA	NA	NA	NA	NA	NA	NA	NA	NA	NA	NA	NA	NA	NA	NA
NM_015918	51367	POP5 || processing of precursor 5, ribonuclease P/1P subunit (S. cerevisiae) (1)	0.91243	0.452294	0.495702	1.39549	61.9432	100	1	0	0	0	0	0	0	0	0	0	0	NA	-16.68	0	0	0	0	0	NA	NA	NA	NA	NA	0	0	0	0	0	0	0	0
NA	84973	MGC16037 || hypothetical protein MGC16037 (3)	0.912204	0.659417	0.722883	1.65682	61.9432	100	NA	NA	NA	NA	NA	0	0	0	0	0	0	NA	NA	NA	NA	NA	NA	NA	NA	NA	NA	NA	NA	NA	NA	NA	NA	NA	NA	NA	NA
NM_018130	55164	SHQ1 || SHQ1 homolog (S. cerevisiae) (2)	0.911584	0.335708	0.368269	1.25242	61.9432	100	1	0	0	0	0	0	0	0	0	0	0	NA	-17.59	0	0	0	0	0	0	0	0	0	0	0	0	0	0	0	0	0	0
NA	283458	NME2P1 || non-metastatic cells 2, protein (NM23B) expressed in, pseudogene 1 (1)	0.911227	0.432042	0.474132	1.33992	61.9432	100	NA	NA	NA	NA	NA	0	0	0	0	0	0	NA	NA	NA	NA	NA	NA	NA	NA	NA	NA	NA	NA	NA	NA	NA	NA	NA	NA	NA	NA
NM_016505	51538	PS1D || putative S1 RNA binding domain protein (2)	0.911033	0.640625	0.703185	1.41399	61.9432	100	2	0	0	1	0	0	0	0	0	0	1	-0.1115	NA	0	0	0	0	0	0	0	0	0	0	1	0	0	0	0	0	0	0
NM_001033515	389833	na || similar to hypothetical protein MGC27019 (1)	0.910768	0.474583	0.52108	1.37695	61.9432	100	2	0	0	0	0	0	0	0	0	0	0	NA	NA	0	0	0	0	0	0	0	0	0	0	NA	NA	NA	NA	NA	NA	NA	NA
NM_021976	6257	RXRB || retinoid X rece1or, beta (1)	0.909569	0.358896	0.394578	1.26529	61.9432	100	0	0	0	0	0	0	0	0	0	0	0	NA	NA	0	0	0	0	0	0	0	0	0	0	0	0	0	0	0	0	0	0
NM_004284	9557	CHD1L || chromodomain helicase DNA binding protein 1-like (1)	0.909535	0.403083	0.443175	1.33163	61.9432	100	0	0	0	0	0	0	0	0	0	0	0	NA	NA	2	0	0	0	0	0	0	0	0	0	NA	NA	NA	NA	NA	NA	NA	NA
NM_173797	167153	PAPD4 || PAP associated domain containing 4 (1)	0.908837	0.335167	0.368786	1.25409	61.9432	100	0	0	0	0	0	0	0	1	0	0	0	NA	NA	2	1	1	1	0	0	0	0	0	0	0	0	0	0	1	0	1	1
NM_000161	2643	GCH1 || GTP cyclohydrolase 1 (dopa-responsive dystonia) (1)	0.907963	0.411125	0.452799	1.30054	61.9432	100	2	1	1	1	1	1	0	0	1	0	0	NA	NA	0	0	0	0	0	0	0	0	0	0	1	1	1	1	0	0	0	0
NM_031934	83871	RAB34 || RAB34, member RAS oncogene family (1)	0.90636	0.427991	0.472208	1.31185	61.9432	100	1	0	0	0	0	0	0	0	0	0	0	NA	-16.59	1	1	0	0	0	0	0	0	0	0	0	0	0	0	0	0	0	0
NM_003318	7272	TTK || TTK protein kinase (1)	0.906014	0.419125	0.462603	1.31295	61.9432	100	0	0	0	0	0	0	0	0	0	0	0	NA	NA	1	0	0	0	0	0	0	0	0	0	0	0	0	0	0	0	0	0
NM_003845	8798	DYRK4 || dual-specificity tyrosine-(Y)-phosphorylation regulated kinase 4 (1)	0.90566	0.480588	0.530649	1.42406	61.9432	100	0	0	0	0	0	0	0	0	0	0	0	NA	NA	0	1	0	0	0	0	0	0	0	0	0	0	0	0	0	0	0	0
NA	400156	RPS26L || 40S ribosomal protein S26-like (1)	0.903953	0.397036	0.439223	1.29196	61.9432	100	NA	NA	NA	NA	NA	0	0	0	0	0	0	NA	NA	NA	NA	NA	NA	NA	NA	NA	NA	NA	NA	NA	NA	NA	NA	NA	NA	NA	NA
NM_000852	2950	GSTP1 || glutathione S-transferase pi (1)	0.903741	0.423889	0.469038	1.31222	61.9432	100	0	0	0	0	0	0	0	0	0	0	0	NA	NA	0	0	0	0	0	NA	NA	NA	NA	NA	0	0	0	0	0	0	0	0
NM_003124	6697	SPR || sepia1erin reductase (7,8-dihydrobio1erin:NADP+ oxidoreductase) (1)	0.902598	0.421208	0.466662	1.30102	61.9432	100	0	0	0	0	0	0	0	0	0	0	0	NA	NA	0	0	0	0	0	NA	NA	NA	NA	NA	0	0	0	0	0	0	0	0
NM_018953	3222	HOXC5 || homeo box C5 (1)	0.901945	0.386458	0.428472	1.28045	61.9432	100	1	0	0	0	0	0	0	1	0	0	0	NA	-20.88	0	0	0	0	0	0	0	0	0	0	0	0	0	0	0	0	0	0
NM_153259	255231	MCOLN2 || mucolipin 2 (1)	0.900923	0.353083	0.391913	1.26252	61.9432	100	1	0	0	0	0	0	0	0	0	0	0	NA	-17.41	1	1	0	0	0	0	0	0	0	0	0	0	0	0	0	0	0	0
NM_004269	9442	CRSP8 || cofactor required for Sp1 transcri1ional activation, subunit 8, 34kDa (2)	0.898796	0.380167	0.422973	1.27439	61.9432	100	0	0	0	0	0	0	0	0	0	0	0	NA	NA	0	1	0	0	0	NA	NA	NA	NA	NA	0	0	0	0	0	0	0	0
NM_152709	219736	STOX1 || storkhead box 1 (1)	0.898365	0.291857	0.324876	1.22177	61.9432	100	0	0	0	0	0	0	0	0	0	0	0	NA	NA	1	0	0	0	0	NA	NA	NA	NA	NA	0	0	0	0	0	0	0	0
NM_002729	3087	HHEX || hematopoietically expressed homeobox (1)	0.897986	0.34225	0.381131	1.26293	61.9432	100	0	2	0	0	0	0	0	0	0	0	0	NA	-18.89	0	0	0	0	0	0	0	0	0	0	0	0	0	0	0	0	0	0
NM_020899	57659	ZBTB4 || zinc finger and BTB domain containing 4 (1)	0.897651	0.393708	0.438598	1.31415	61.9432	100	2	1	1	1	1	1	0	0	0	1	0	-0.2368	-18.98	0	0	0	0	0	0	0	0	0	0	1	1	1	1	0	0	0	0
NM_020153	56912	FLJ21827 || hypothetical protein FLJ21827 (1)	0.897591	0.34975	0.389654	1.26144	61.9432	100	0	0	0	0	0	0	0	0	0	0	0	NA	NA	1	0	0	0	0	0	0	0	0	0	0	0	0	0	0	0	0	0
NA	56624	ASAH2 || N-acylsphingosine amidohydrolase (non-lysosomal ceramidase) 2 (2)	0.897212	0.374667	0.41759	1.32491	61.9432	100	NA	NA	NA	NA	NA	0	0	0	0	0	0	NA	NA	NA	NA	NA	NA	NA	NA	NA	NA	NA	NA	NA	NA	NA	NA	NA	NA	NA	NA
NM_182922	55027	FLJ20718 || hypothetical protein FLJ20718 (2)	0.897068	0.347083	0.386909	1.28116	61.9432	100	0	2	0	0	0	0	0	0	0	0	0	NA	-19.55	0	0	0	0	0	0	0	0	0	0	0	0	0	0	0	0	0	0
NM_001960	1936	EEF1D || eukaryotic translation elongation factor 1 delta (guanine nucleotide exchange protein) (3)	0.896524	0.639542	0.713357	1.51324	61.9432	100	0	0	0	0	0	0	0	0	0	0	0	NA	NA	0	0	0	0	0	0	0	0	0	0	0	0	0	0	0	0	0	0
NM_006184	4924	NUCB1 || nucleobindin 1 (1)	0.894777	0.457292	0.511068	1.32362	61.9432	100	0	0	0	0	0	0	0	0	0	0	0	NA	NA	0	1	0	0	0	NA	NA	NA	NA	NA	0	0	0	0	0	0	0	0
NA	344227	na || similar to POTE2A (1)	0.893287	0.435738	0.487791	1.32477	61.9432	100	NA	NA	NA	NA	NA	0	0	0	0	0	0	NA	NA	NA	NA	NA	NA	NA	NA	NA	NA	NA	NA	NA	NA	NA	NA	NA	NA	NA	NA
NM_147148	2948	GSTM4 || glutathione S-transferase M4 (2)	0.89313	0.469083	0.525213	1.347	61.9432	100	0	0	0	0	0	0	0	0	0	0	0	NA	NA	0	0	0	0	0	0	0	0	0	0	0	0	0	0	0	0	0	0
NM_000127	2131	EXT1 || exostoses (multiple) 1 (1)	0.893005	0.341667	0.382603	1.27446	61.9432	100	0	0	0	0	0	0	0	0	0	0	0	NA	NA	0	2	0	0	0	0	0	0	0	0	0	0	0	0	0	0	0	0
NM_020189	56943	ENY2 || enhancer of yellow 2 homolog (Drosophila) (1)	0.892469	0.620792	0.695589	1.41658	61.9432	100	0	0	0	0	0	0	0	0	0	0	0	NA	NA	1	1	1	0	0	0	0	0	0	0	0	0	0	0	0	0	1	1
NM_002047	2617	GARS || glycyl-tRNA synthetase (1)	0.890798	0.398929	0.447834	1.30036	61.9432	100	0	0	0	0	0	0	0	0	0	0	0	NA	NA	1	2	1	1	1	0	0	0	0	0	0	0	0	0	1	1	1	1
NM_001039569	130340	AP1S3 || ada1or-related protein complex 1, sigma 3 subunit (1)	0.89022	0.523286	0.587816	1.34069	61.9432	100	1	1	1	1	1	0	0	0	0	0	1	-0.313	-17.31	0	0	0	0	0	0	0	0	0	0	1	0	1	0	0	0	0	0
NM_006599	10725	NFAT5 || nuclear factor of activated T-cells 5, tonicity-responsive (1)	0.889898	0.298233	0.335132	1.23139	61.9432	100	5	4	1	3	0	1	1	0	0	1	1	-0.2744	-25.73	0	0	0	0	0	0	0	0	0	0	3	2	1	0	0	0	0	0
NM_004674	9070	ASH2L || ash2 (absent, small, or homeotic)-like (Drosophila) (1)	0.889417	0.391417	0.440082	1.30467	61.9432	100	1	1	1	1	1	1	0	0	0	1	0	-0.4507	-19.02	0	0	0	0	0	0	0	NA	NA	NA	1	1	1	0	0	0	0	0
NM_007217	11235	PDCD10 || programmed cell death 10 (3)	0.889266	0.477458	0.536913	1.47665	61.9432	100	1	1	1	0	0	1	1	0	0	1	0	-0.3525	-19.7	0	0	0	0	0	0	0	0	0	0	0	0	1	1	0	0	0	0
NM_005665	7813	EVI5 || ecotropic viral integration site 5 (1)	0.888735	0.421458	0.474222	1.3157	61.9432	100	0	1	0	0	0	0	0	0	0	0	0	NA	-16.86	2	0	0	2	0	NA	NA	NA	NA	NA	0	0	0	0	2	1	0	0
NM_152594	161742	SPRED1 || sprouty-related, EVH1 domain containing 1 (2)	0.887962	0.421208	0.474354	1.3081	61.9432	100	3	3	2	1	1	1	1	1	0	1	1	-0.5706	-22.8	0	1	0	0	0	0	0	0	0	0	1	1	2	1	0	0	0	0
NM_006841	10991	SLC38A3 || solute carrier family 38, member 3 (1)	0.887785	0.4665	0.525465	1.42917	61.9432	100	2	1	1	1	1	1	0	0	0	1	0	-0.224	-17.48	1	0	0	0	0	0	0	0	0	0	1	1	1	1	0	0	0	0
NA	5721	PSME2 || proteasome (prosome, macropain) activator subunit 2 (PA28 beta) (2)	0.887695	0.437958	0.493366	1.34921	61.9432	100	NA	NA	NA	NA	NA	0	0	0	0	0	0	NA	NA	NA	NA	NA	NA	NA	NA	NA	NA	NA	NA	NA	NA	NA	NA	NA	NA	NA	NA
NM_014306	51493	HSPC117 || hypothetical protein HSPC117 (1)	0.885964	0.4265	0.481397	1.31083	61.9432	100	1	1	1	0	0	0	0	0	0	0	1	-0.2303	-18.56	1	1	1	0	0	0	0	0	0	0	0	0	1	0	0	0	1	0
NM_015960	51076	CUTC || cutC copper transporter homolog (E.coli) (2)	0.884469	0.299542	0.338668	1.23444	61.9432	100	0	0	0	0	0	0	0	0	0	0	0	NA	NA	0	1	0	0	0	0	0	0	0	0	0	0	0	0	0	0	0	0
NM_000362	7078	TIMP3 || tissue inhibitor of metalloproteinase 3 (Sorsby fundus dystrophy, pseudoinflammatory) (2)	0.883467	0.41788	0.473	1.29486	61.9432	100	2	2	1	2	1	1	1	1	1	1	0	-0.3001	-21.02	0	0	0	0	0	1	0	0	0	0	2	2	1	1	0	0	0	0
NM_001080394	23514	KIAA0146 || KIAA0146 protein (2)	0.883356	0.413396	0.467983	1.32609	61.9432	100	1	1	1	0	0	0	0	0	0	0	1	-0.2706	-17.85	0	1	0	0	0	NA	NA	NA	NA	NA	0	0	1	0	0	0	0	0
NM_138799	129642	OACT2 || O-acyltransferase (membrane bound) domain containing 2 (3)	0.882851	0.476792	0.540059	1.36754	61.9432	100	0	0	0	0	0	0	0	0	0	0	0	NA	NA	0	4	0	0	0	0	0	0	0	0	0	0	0	0	0	0	0	0
NM_020642	56672	C11orf17 || chromosome 11 open reading frame 17 (2)	0.882308	0.400167	0.453545	1.29003	61.9432	100	0	0	0	0	0	0	0	0	0	0	0	NA	NA	0	0	0	0	0	0	0	0	0	0	0	0	0	0	0	0	0	0
NM_152391	130814	C2orf22 || chromosome 2 open reading frame 22 (2)	0.881412	0.393542	0.44649	1.34612	61.9432	100	0	0	0	0	0	0	0	0	0	0	0	NA	NA	0	0	0	0	0	0	0	0	0	0	0	0	0	0	0	0	0	0
NM_014046	28973	1PS18B || mitochondrial ribosomal protein S18B (3)	0.881296	0.415208	0.471134	1.29683	61.9432	100	0	0	0	0	0	0	0	0	0	0	0	NA	NA	0	0	0	0	0	NA	NA	NA	NA	NA	0	0	0	0	0	0	0	0
NM_032997	11130	ZWINT || ZW10 interactor (2)	0.88101	0.367667	0.417324	1.29414	61.9432	100	1	1	0	0	0	0	0	0	0	0	0	NA	-18.01	0	0	0	0	0	NA	NA	NA	NA	NA	0	0	0	0	0	0	0	0
NM_004628	7508	XPC || xeroderma pigmentosum, complementation group C (1)	0.880991	0.369958	0.419934	1.31087	61.9432	100	0	0	0	0	0	0	0	0	0	0	0	NA	NA	1	0	0	1	0	0	0	0	0	0	0	0	0	0	1	0	0	0
NM_138820	192286	MGC2198 || hypothetical protein MGC2198 (2)	0.880626	0.475	0.539389	1.33852	61.9432	100	0	0	0	0	0	0	0	0	0	0	0	NA	NA	0	0	0	0	0	NA	NA	NA	NA	NA	0	0	0	0	0	0	0	0
NM_016006	51099	ABHD5 || abhydrolase domain containing 5 (1)	0.879676	0.355833	0.404505	1.30229	61.9432	100	0	0	0	0	0	0	0	0	0	0	0	NA	NA	1	2	1	1	1	0	0	0	0	0	0	0	0	0	1	1	1	1
NM_016037	51118	CGI-94 || comparative gene identification transcri1 94 (1)	0.879249	0.495583	0.563644	1.3565	82.4024	100	1	0	0	0	0	0	0	0	0	0	0	NA	-17.53	0	0	0	0	0	0	0	0	0	0	0	0	0	0	0	0	0	0
NM_016946	50848	F11R || F11 rece1or (2)	0.878779	0.273708	0.311464	1.21901	82.4024	100	1	0	0	1	0	0	0	0	0	0	1	0.0647	-18.2	1	0	0	0	0	0	0	0	0	0	1	0	0	0	0	0	0	0
NM_006423	10567	RABAC1 || Rab acce1or 1 (prenylated) (2)	0.878505	0.382708	0.435636	1.27542	82.4024	100	0	0	0	0	0	0	0	0	0	0	0	NA	NA	0	1	0	0	0	NA	NA	NA	NA	NA	0	0	0	0	0	0	0	0
NM_004275	9477	TRFP || Trf (TATA binding protein-related factor)-proximal homolog (Drosophila) (1)	0.878463	0.317917	0.361901	1.23606	82.4024	100	2	0	0	1	0	0	0	0	0	0	1	-0.021	-16.99	0	0	0	0	0	0	0	0	0	0	1	0	0	0	0	0	0	0
NA	55009	C19orf24 || chromosome 19 open reading frame 24 (1)	0.878085	0.577875	0.658108	1.36809	82.4024	100	NA	NA	NA	NA	NA	0	0	0	0	0	0	NA	NA	NA	NA	NA	NA	NA	NA	NA	NA	NA	NA	NA	NA	NA	NA	NA	NA	NA	NA
NM_014280	22826	DNAJC8 || DnaJ (Hsp40) homolog, subfamily C, member 8 (1)	0.877355	0.313917	0.357799	1.24371	82.4024	100	0	0	0	0	0	0	0	0	0	0	0	NA	NA	0	0	0	0	0	NA	NA	NA	NA	NA	0	0	0	0	0	0	0	0
NM_004891	9553	1PL33 || mitochondrial ribosomal protein L33 (2)	0.87701	0.481417	0.548929	1.35171	82.4024	100	0	0	0	0	0	0	0	0	0	0	0	NA	NA	0	1	0	0	0	0	0	0	0	0	0	0	0	0	0	0	0	0
NA	2971	GTF3A || general transcri1ion factor IIIA (1)	0.876663	0.30075	0.343062	1.22736	82.4024	100	NA	NA	NA	NA	NA	0	0	0	0	0	0	NA	NA	NA	NA	NA	NA	NA	NA	NA	NA	NA	NA	NA	NA	NA	NA	NA	NA	NA	NA
NM_145173	148252	DIRAS1 || DIRAS family, GTP-binding RAS-like 1 (1)	0.87574	0.450375	0.514279	1.35351	82.4024	100	1	0	0	0	0	0	0	0	0	0	0	NA	-21.6	0	0	0	0	0	0	0	0	0	0	0	0	0	0	0	0	0	0
NM_000244	4221	MEN1 || multiple endocrine neoplasia I (1)	0.875702	0.41925	0.478759	1.304	82.4024	100	0	0	0	0	0	0	0	0	0	0	0	NA	NA	0	0	0	0	0	0	0	0	0	0	0	0	0	0	0	0	0	0
NM_032320	84280	G1P-1 || K+ channel tetramerization protein (1)	0.875532	0.282292	0.322423	1.21913	82.4024	100	0	0	0	0	0	0	0	0	0	0	0	NA	NA	1	2	1	0	0	0	0	0	0	0	0	0	0	0	0	0	1	1
NM_007359	22794	CASC3 || cancer susce1ibility candidate 3 (1)	0.874655	0.408389	0.466914	1.29088	82.4024	100	0	0	0	0	0	0	0	0	0	0	0	NA	NA	0	1	0	0	0	0	0	0	0	0	0	0	0	0	0	0	0	0
NM_005524	3280	HES1 || hairy and enhancer of split 1, (Drosophila) (1)	0.874323	0.511458	0.584977	1.48966	82.4024	100	0	0	0	0	0	0	0	0	0	0	0	NA	-17.25	2	1	0	1	0	0	0	0	0	0	0	0	0	0	1	0	0	0
NM_000561	2944	GSTM1 || glutathione S-transferase M1 (2)	0.87396	0.498708	0.570631	1.33931	82.4024	100	0	0	0	0	0	0	0	0	0	0	0	NA	NA	0	0	0	0	0	0	0	0	0	0	0	0	0	0	0	0	0	0
NM_178545	339456	LOC339456 || hypothetical protein LOC339456 (2)	0.871946	0.445209	0.510592	1.32752	82.4024	100	0	0	0	0	0	0	0	0	0	0	0	NA	NA	0	0	0	0	0	NA	NA	NA	NA	NA	0	0	0	0	0	0	0	0
NM_005441	8208	CHAF1B || chromatin assembly factor 1, subunit B (p60) (1)	0.871937	0.385792	0.442454	1.34032	82.4024	100	0	0	0	0	0	0	0	0	0	0	0	NA	NA	0	0	0	0	0	0	0	0	0	0	0	0	0	0	0	0	0	0
NM_001017928	131076	LOC131076 || hypothetical LOC131076 (1)	0.870494	0.297458	0.341712	1.22118	82.4024	100	0	0	0	0	0	0	0	0	0	0	0	NA	NA	0	0	0	0	0	NA	NA	NA	NA	NA	0	0	0	0	0	0	0	0
NM_000405	2760	GM2A || GM2 ganglioside activator (2)	0.869982	0.388658	0.446743	1.27869	82.4024	100	0	1	0	0	0	0	0	0	0	0	0	NA	-17.53	0	0	0	0	0	0	0	0	0	0	0	0	0	0	0	0	0	0
NM_002106	3015	H2AFZ || H2A histone family, member Z (1)	0.869699	0.350998	0.403586	1.28116	82.4024	100	0	0	0	0	0	0	0	0	0	0	0	NA	NA	1	0	0	1	0	0	1	0	0	0	0	0	0	0	1	0	0	0
NM_018031	11180	WDR6 || WD repeat domain 6 (1)	0.869485	0.44975	0.51726	1.32125	82.4024	100	1	1	1	0	0	1	0	0	0	1	0	-0.2506	-18.68	0	0	0	0	0	NA	NA	NA	NA	NA	0	0	1	1	0	0	0	0
NA	441925	na || similar to Bcl-2-interacting protein beclin (1)	0.869087	0.506208	0.58246	1.35018	82.4024	100	NA	NA	NA	NA	NA	0	0	0	0	0	0	NA	NA	NA	NA	NA	NA	NA	NA	NA	NA	NA	NA	NA	NA	NA	NA	NA	NA	NA	NA
NM_018045	55108	FLJ10276 || hypothetical protein FLJ10276 (1)	0.868972	0.431417	0.496468	1.30598	82.4024	100	3	1	1	1	0	1	0	0	0	1	1	-0.0995	-17.8	1	1	1	0	0	NA	NA	NA	NA	NA	1	0	1	1	0	0	1	0
NM_016095	51659	Pfs2 || DNA replication complex GINS protein PSF2 (1)	0.868866	0.295514	0.340115	1.229	82.4024	100	0	1	0	0	0	0	0	0	0	0	0	NA	-17.07	0	0	0	0	0	0	0	0	0	0	0	0	0	0	0	0	0	0
NM_016128	22820	COPG || coatomer protein complex, subunit gamma (1)	0.867643	0.413292	0.476339	1.28653	82.4024	100	0	1	0	0	0	0	0	0	0	0	0	NA	NA	1	2	0	1	0	0	0	0	0	0	0	0	0	0	1	0	0	0
NM_006825	10970	CKAP4 || cytoskeleton-associated protein 4 (1)	0.866002	0.393917	0.454868	1.40168	82.4024	100	0	0	0	0	0	0	0	0	0	0	0	NA	NA	0	0	0	0	0	0	0	0	0	0	0	0	0	0	0	0	0	0
NA	342994	na || similar to ribosomal protein L34; 60S ribosomal protein L34 (1)	0.86597	0.508333	0.58701	1.3335	82.4024	100	NA	NA	NA	NA	NA	0	0	0	0	0	0	NA	NA	NA	NA	NA	NA	NA	NA	NA	NA	NA	NA	NA	NA	NA	NA	NA	NA	NA	NA
NM_006496	2773	GNAI3 || guanine nucleotide binding protein (G protein), alpha inhibiting activity polype1ide 3 (2)	0.864132	0.498708	0.57712	1.42177	82.4024	100	0	0	0	0	0	0	0	0	0	0	0	NA	-17.26	1	1	1	1	1	NA	NA	NA	NA	NA	0	0	0	0	1	1	1	1
NM_001007468	6598	SMARCB1 || SWI/SNF related, matrix associated, actin dependent regulator of chromatin, subfamily b, member 1 (1)	0.863661	0.551206	0.63822	1.43571	82.4024	100	1	1	1	1	1	1	0	0	0	1	0	-0.2425	-17.5	0	0	0	0	0	0	0	0	0	0	1	1	1	1	0	0	0	0
NM_005216	1650	DDOST || dolichyl-diphosphooligosaccharide-protein glycosyltransferase (1)	0.863321	0.456509	0.528782	1.31863	82.4024	100	0	0	0	0	0	0	0	0	0	0	0	NA	NA	0	2	0	0	0	0	0	0	0	0	0	0	0	0	0	0	0	0
NM_198337	3638	INSIG1 || insulin induced gene 1 (2)	0.862935	0.450896	0.522514	1.31	82.4024	100	1	1	0	0	0	0	0	0	0	0	0	NA	-16.99	0	0	0	0	0	0	0	0	0	0	0	0	0	0	0	0	0	0
NM_003762	8674	VAMP4 || vesicle-associated membrane protein 4 (3)	0.862311	0.328438	0.38088	1.25463	82.4024	100	1	1	1	1	1	0	1	0	0	1	0	-0.4423	-18.46	0	0	0	0	0	0	0	0	0	0	1	1	1	1	0	0	0	0
NM_022731	64710	NUCKS || nuclear ubiquitous casein kinase and cyclin-dependent kinase substrate (1)	0.861332	0.420854	0.488609	1.29078	82.4024	100	0	0	0	0	0	0	0	0	0	0	0	NA	-21.32	1	0	0	1	0	0	0	0	0	0	0	0	0	0	1	0	0	0
NM_021210	58485	TRAPPC1 || trafficking protein particle complex 1 (1)	0.861233	0.426	0.49464	1.30427	82.4024	100	0	0	0	0	0	0	0	0	0	0	0	NA	NA	0	0	0	0	0	0	0	0	0	0	0	0	0	0	0	0	0	0
NM_002032	2495	FTH1 || ferritin, heavy polype1ide 1 (2)	0.861083	0.328092	0.381022	1.2797	82.4024	100	1	0	0	0	0	0	0	0	0	0	0	NA	-19.1	0	0	0	0	0	0	0	0	0	0	0	0	0	0	0	0	0	0
NM_033271	90135	BTBD6 || BTB (POZ) domain containing 6 (1)	0.860442	0.49	0.569475	1.31104	82.4024	100	0	0	0	0	0	0	0	0	0	0	0	NA	NA	1	1	1	1	1	0	0	0	0	0	0	0	0	0	1	0	1	0
NM_018509	55379	PRO1855 || hypothetical protein PRO1855 (1)	0.858105	0.373875	0.435698	1.3263	82.4024	100	3	1	1	0	0	0	0	0	0	0	1	-0.2184	-20.5	0	0	0	0	0	0	0	0	0	0	0	0	1	0	0	0	0	0
NM_013446	23608	MKRN1 || makorin, ring finger protein, 1 (2)	0.857464	0.330625	0.385585	1.27181	82.4024	100	1	0	0	1	0	1	0	0	0	1	0	-0.0007	-17.59	1	0	0	1	0	0	0	0	0	0	1	1	0	0	1	1	0	0
NM_020990	1159	CKMT1B || creatine kinase, mitochondrial 1B (2)	0.856808	0.322042	0.375862	1.25644	82.4024	100	0	0	0	0	0	0	0	0	0	0	0	NA	NA	0	0	0	0	0	1	0	0	0	0	0	0	0	0	0	0	0	0
NM_005168	390	RND3 || Rho family GTPase 3 (1)	0.855513	0.3785	0.442425	1.29424	82.4024	100	0	0	0	0	0	0	0	0	0	0	0	NA	NA	0	0	0	0	0	0	0	0	0	0	0	0	0	0	0	0	0	0
NM_052936	115201	APG4A || APG4 autophagy 4 homolog A (S. cerevisiae) (2)	0.855071	0.517708	0.605456	1.36003	82.4024	100	0	0	0	0	0	0	0	0	0	0	0	NA	NA	0	0	0	0	0	0	0	0	0	0	0	0	0	0	0	0	0	0
NM_001008910	8576	STK16 || serine/threonine kinase 16 (1)	0.854963	0.461833	0.54018	1.32228	82.4024	100	1	0	0	1	0	0	0	0	0	0	1	-0.0382	-17.01	1	1	1	0	0	0	0	0	0	0	1	0	0	0	0	0	1	0
NA	387882	LOC387882 || hypothetical protein (1)	0.853604	0.359125	0.420716	1.31747	82.4024	100	NA	NA	NA	NA	NA	0	0	0	0	0	0	NA	NA	NA	NA	NA	NA	NA	NA	NA	NA	NA	NA	NA	NA	NA	NA	NA	NA	NA	NA
NM_006606	10741	RBBP9 || retinoblastoma binding protein 9 (1)	0.852454	0.370667	0.434823	1.3557	82.4024	100	2	3	1	1	1	0	0	0	0	0	1	-0.1909	-22.05	0	0	0	0	0	0	0	0	0	0	1	0	1	0	0	0	0	0
NM_022908	64943	FLJ12442 || hypothetical protein FLJ12442 (1)	0.850859	0.360208	0.423347	1.25752	82.4024	100	0	0	0	0	0	0	0	0	0	0	0	NA	NA	0	1	0	0	0	0	0	0	0	0	0	0	0	0	0	0	0	0
NM_003860	8815	BANF1 || barrier to autointegration factor 1 (3)	0.849697	0.467958	0.550736	1.31407	82.4024	100	0	0	0	0	0	0	0	0	0	0	0	NA	NA	0	0	0	0	0	0	0	0	0	0	0	0	0	0	0	0	0	0
NM_001007226	8405	SPOP || speckle-type POZ protein (1)	0.848546	0.437667	0.515784	1.35478	82.4024	100	0	0	0	0	0	0	0	0	0	0	0	NA	NA	0	0	0	0	0	0	0	0	0	0	0	0	0	0	0	0	0	0
NM_002945	6117	RPA1 || replication protein A1, 70kDa (1)	0.848533	0.329542	0.388366	1.27711	82.4024	100	1	1	1	0	0	0	0	0	0	0	1	-0.2127	-19.7	0	0	0	0	0	NA	NA	NA	NA	NA	0	0	1	0	0	0	0	0
NM_021237	58515	SELK || selenoprotein K (2)	0.848199	0.467617	0.551305	1.34183	82.4024	100	0	0	0	0	0	0	0	0	0	0	0	NA	NA	0	0	0	0	0	0	0	0	0	0	0	0	0	0	0	0	0	0
NA	284064	na || similar to 60S ribosomal protein L29 (Cell surface heparin binding protein HIP) (1)	0.848139	0.447736	0.527904	1.31393	82.4024	100	NA	NA	NA	NA	NA	0	0	0	0	0	0	NA	NA	NA	NA	NA	NA	NA	NA	NA	NA	NA	NA	NA	NA	NA	NA	NA	NA	NA	NA
NM_001009570	10574	CCT7 || chaperonin containing TCP1, subunit 7 (eta) (1)	0.846992	0.288904	0.341094	1.21661	82.4024	100	0	0	0	0	0	0	0	0	0	0	0	NA	NA	0	2	0	0	0	0	0	0	0	0	0	0	0	0	0	0	0	0
NM_016235	51704	GPRC5B || G protein-coupled rece1or, family C, group 5, member B (1)	0.845926	0.501875	0.593284	1.35661	82.4024	100	1	0	0	0	0	0	0	0	0	0	0	NA	-19.08	0	0	0	0	0	0	0	0	0	0	0	0	0	0	0	0	0	0
NM_005032	5358	PLS3 || plastin 3 (T isoform) (1)	0.845702	0.397515	0.470041	1.29755	82.4024	100	0	0	0	0	0	0	0	1	0	0	0	NA	-20.74	0	0	0	0	0	0	0	0	0	0	0	0	0	0	0	0	0	0
NM_014763	9801	1PL19 || mitochondrial ribosomal protein L19 (2)	0.845584	0.509271	0.602271	1.35167	82.4024	100	2	1	0	1	0	0	0	0	0	0	1	-0.0643	-19.67	2	1	1	1	1	NA	NA	NA	NA	NA	1	0	0	0	1	0	1	0
NM_014924	22863	KIAA0831 || KIAA0831 (1)	0.845531	0.376208	0.444937	1.30415	82.4024	100	2	1	1	0	0	1	0	0	0	1	0	-0.1444	NA	0	1	0	0	0	NA	NA	NA	NA	NA	0	0	1	1	0	0	0	0
NA	441371	na || similar to hypothetical protein A630048M13 (1)	0.845353	0.334585	0.395794	1.25508	82.4024	100	NA	NA	NA	NA	NA	0	0	0	0	0	0	NA	NA	NA	NA	NA	NA	NA	NA	NA	NA	NA	NA	NA	NA	NA	NA	NA	NA	NA	NA
NM_024615	79668	PARP8 || poly (ADP-ribose) polymerase family, member 8 (1)	0.842969	0.349652	0.414786	1.25266	82.4024	100	0	0	0	0	0	0	0	0	0	0	0	NA	NA	1	0	0	1	0	0	0	0	0	0	0	0	0	0	1	1	0	0
NM_014762	1718	DHCR24 || 24-dehydrocholesterol reductase (1)	0.839988	0.402833	0.47957	1.32578	82.4024	100	2	0	0	2	0	0	0	0	0	0	1	0.0494	-17.42	1	2	1	0	0	0	0	0	0	0	2	0	0	0	0	0	1	1
NM_001009932	1774	DNASE1L1 || deoxyribonuclease I-like 1 (2)	0.839492	0.390583	0.465262	1.36943	82.4024	100	0	0	0	0	0	0	0	0	0	0	0	NA	NA	0	0	0	0	0	0	0	0	0	0	0	0	0	0	0	0	0	0
NM_004287	9570	GOSR2 || golgi SNAP rece1or complex member 2 (4)	0.838334	0.310167	0.36998	1.24385	82.4024	100	2	0	0	0	0	0	0	0	0	0	0	NA	-17.62	0	0	0	0	0	0	0	0	0	0	0	0	0	0	0	0	0	0
NM_020438	57171	DOLPP1 || dolichyl pyrophosphate phosphatase 1 (3)	0.838286	0.519833	0.620114	1.34582	82.4024	100	1	0	0	1	0	0	0	0	0	0	1	-0.0392	-17.33	2	0	0	0	0	NA	NA	NA	NA	NA	1	0	0	0	0	0	0	0
NM_007213	11230	PRAF2 || PRA1 domain family, member 2 (1)	0.838259	0.321667	0.383732	1.23839	82.4024	100	0	0	0	0	0	0	0	0	0	0	0	NA	NA	0	0	0	0	0	NA	NA	NA	NA	NA	0	0	0	0	0	0	0	0
NM_006471	10627	1CL3 || myosin regulatory light chain 1CL3 (1)	0.838236	0.313292	0.373751	1.25022	82.4024	100	0	0	0	0	0	0	0	0	0	0	0	NA	-18.05	0	0	0	0	0	0	0	0	0	0	0	0	0	0	0	0	0	0
NM_004528	4259	MGST3 || microsomal glutathione S-transferase 3 (1)	0.83717	0.42125	0.503183	1.29535	82.4024	100	0	0	0	0	0	0	0	0	0	0	0	NA	NA	0	0	0	0	0	0	0	0	0	0	0	0	0	0	0	0	0	0
NM_032313	84273	C4orf14 || chromosome 4 open reading frame 14 (2)	0.8366	0.33725	0.40312	1.28772	82.4024	100	0	0	0	0	0	0	0	0	0	0	0	NA	NA	1	2	1	0	0	0	0	0	0	0	0	0	0	0	0	0	1	0
NM_001003796	4809	NHP2L1 || NHP2 non-histone chromosome protein 2-like 1 (S. cerevisiae) (2)	0.835934	0.299729	0.358556	1.22401	82.4024	100	0	0	0	0	0	0	0	0	0	0	0	NA	NA	0	0	0	0	0	0	0	0	0	0	0	0	0	0	0	0	0	0
NM_003418	7555	ZNF9 || zinc finger protein 9 (a cellular retroviral nucleic acid binding protein) (1)	0.835431	0.529958	0.634353	1.34892	82.4024	100	0	0	0	0	0	0	0	0	0	0	0	NA	NA	0	1	0	0	0	0	0	0	0	0	0	0	0	0	0	0	0	0
NM_001033578	23678	SGKL || serum/glucocorticoid regulated kinase-like (3)	0.834929	0.496958	0.59521	1.34063	82.4024	100	1	0	0	0	0	0	0	0	0	0	0	NA	NA	3	1	1	1	1	0	0	0	0	0	0	0	0	0	1	0	1	0
NM_001040158	9555	H2AFY || H2A histone family, member Y (1)	0.834852	0.329167	0.394281	1.23874	82.4024	100	0	0	0	0	0	0	0	0	0	0	0	NA	NA	0	0	0	0	0	0	0	0	0	0	0	0	0	0	0	0	0	0
NA	286440	LOC286440 || hypothetical protein LOC286440 (1)	0.833758	0.351625	0.421735	1.27504	82.4024	100	NA	NA	NA	NA	NA	0	0	0	0	0	0	NA	NA	NA	NA	NA	NA	NA	NA	NA	NA	NA	NA	NA	NA	NA	NA	NA	NA	NA	NA
NM_001014990	29093	1PL22 || mitochondrial ribosomal protein L22 (1)	0.833684	0.46181	0.553939	1.33138	82.4024	100	0	0	0	0	0	0	0	0	0	0	0	NA	NA	0	0	0	0	0	0	0	0	0	0	0	0	0	0	0	0	0	0
[truncated: 8,003 more rows]

## Sheet: Ago2_vs_Ago2miR1_EXP_SAM_in
entrez_id	description	mock Expression (#1)|| gene expression BATCH GROUP 4	mock Expression (#2)|| gene expression BATCH GROUP 4	mock Expression (#3)|| gene expression BATCH GROUP 4	Ago2 Expression (#1)|| gene expression BATCH GROUP 4	Ago2 Expression (#2)|| gene expression BATCH GROUP 4	Ago2 Expression (#3)|| gene expression BATCH GROUP 4	Ago2 Expression (#4)|| gene expression BATCH GROUP 5	Ago2 Expression (#5)|| gene expression BATCH GROUP 5	Ago2 Expression (#6)|| gene expression BATCH GROUP 5	Ago2 Expression (#7)|| gene expression BATCH GROUP 5	Ago2+ miR-1 Expression (#1)|| gene expression BATCH GROUP 5	Ago2 + miR-1 Expression (#2)|| gene expression BATCH GROUP 5	Ago2 + miR-1 Expression (#3)|| gene expression BATCH GROUP 5	Ago2 + miR-1 Expression (#4)|| gene expression BATCH GROUP 5
[truncated: 13,577 more rows]

[truncated: 1 more sheets: Ago2_vs_Ago2miR1_EXP_SAM_out]
