# Supplementary material for: Systematic Identification of mRNAs Recruited to Argonaute 2 by Specific microRNAs and Corresponding Changes in Transcript Abundance
Source: PLoS One. 2008 May 7;3(5):e2126. doi: 10.1371/journal.pone.0002126 (PMC2330160; doi:10.1371/journal.pone.0002126)
Supplement: Dataset S3 — Ago2/miR-124 versus Ago2, IP and expression HEEBO microarray data (14.55 MB XLS) [file pone.0002126.s006.xls]

## Sheet: key
worksheets:
Ago2_vs_Ago2miR124_IP_SAM_in = Batch normalized microarray data from Ago2 + miR-124 and Ago2 IPs.
Ago2_vs_Ago2miR124_IP_SAM_out = SAM output plus other information.
Ago2_vs_Ago2miR124_EXP_SAM_in = = Normalized microarry data from Ago2 + miR-124 and Ago2 and mock expression analyses.
Ago2_vs_Ago2miR124_EXP_SAM_out = SAM ouput plus other information.
key to SAM output worksheets:
refseq
entrez_id
description
sam_score = D score from SAM. Similar to t-score.
sam_numerator = log2 of fold change between average Ago2 values and mock values.
sam_denominator = standard deviation plus SAM fudge factor.
fold_change
fdr = q-value from SAM.
local_fdr = local FDR from SAM.
X3UTR_6mer_n2_7 = 3'-UTR 6mer_n2-7 seed match
X3UTR_6mer_n3_8 = 3'-UTR 6mer_n3-8 seed match
X3UTR_7merm8 = 3'-UTR 7mer-m8 seed match
X3UTR_7merA1 = 3'-UTR 7mer-A1 seed match
X3UTR_8mer = 3'-UTR 8mer seed match
targetscan3.0 = if yes, 1, else 0.
pictar5way = if yes, 1, else 0.
miranda = if yes, 1, else 0.
lim_expression = if significantly down-regulated in Lim et al. 2005 1, else 0.
targetscan4.0_conserved = if yes, 1, else 0.
targetscan4.0_nonconserved = if yes, 1, else 0.
targetscan4.0_cum_cs = Cumulative context score.
PITA_315 = DDG value for interaction with miRNA.
ORFn2_7 = coding sequence 6mer_n2-7 seed match
ORFn3_8 = coding sequence 6mer_n3-8 seed match
ORF_7merm8 = coding sequence 7mer-m8 seed match
ORF_7merA1 = coding sequence 7mer-A1 seed match
ORF_8mer = coding sequence 8mer seed match
X5UTRn2_7 = 5'-UTR 6mer_n-7 seed match
X5UTRn3_8 = 5'-UTR 6mer_n3-8 seed match
X5UTR_7merm8 = 5'-UTR 7mer-m8 seed match
X5UTR_7merA1 = 5'-UTR 7mer-A1 seed match
X5UTR_8mer = 5'-UTR 8mer seed match
X3UTR_hs_s7merA1 = Human 3'-UTR 7mer-A1 seed match in human, dog, mouse, rat multiple alighment file
X3UTR_con_s7merA1 = Conserved 3'-UTR 7mer-m8 seed match in human, dog, mouse, rat multiple alighment file
X3UTR_hs_s7merm8 = Human 3'-UTR 7mer-m8 seed match in human, dog, mouse, rat multiple alighment file
X3UTR_con_s7merm8 = Conserved 3'-UTR 7mer-m8 seed match in human, dog, mouse, rat multiple alighment file
ORF_hs_s7merA1 = Human coding sequence 7mer-A1 seed match in human, dog, mouse, rat multiple alighment file
ORF_con_s7merA1 = Conserved coding sequence 7mer-m8 seed match in human, dog, mouse, rat multiple alighment file
ORF_hs_s7merm8 = Human coding sequence 7mer-m8 seed match in human, dog, mouse, rat multiple alighment file
ORF_con_s7merm8 = Conserved coding sequence 7mer-m8 seed match in human, dog, mouse, rat multiple alighment file

## Sheet: Ago2miR124_vs_Ago2_IP_SAM_in
entrez_id	description	Ago2 IP (#1)|| BATCH GROUP 1	Ago2 IP (#2)|| BATCH GROUP 1	Ago2 IP (#3)|| BATCH GROUP 1	Ago2 IP (#4)|| BATCH GROUP 1	Ago2 IP (#5)|| BATCH GROUP 2	Ago2 IP (#6)|| BATCH GROUP 2	Ago2 IP (#7)|| BATCH GROUP 2	Ago2 IP (#8)|| BATCH GROUP 3	Ago2 + miR-124 IP (#1)|| BATCH GROUP 2	Ago2 + miR-124 IP (#2)|| BATCH GROUP 2	Ago2 + miR-124 IP (#3)|| BATCH GROUP 3
1	A1BG || alpha-1-B glycoprotein (1)	0.41	0.12	-0.12	-1.08	-2.53e-08	-0.113	1.12	-0.287	-0.2	0.472	0.237
100	ADA || adenosine deaminase (2)	0.025	0.345	-0.025	-0.72	-0.38	-0.163	0.57	0.2	-0.56	0.0466	-0.385
1000	CDH2 || cadherin 2, type 1, N-cadherin (neuronal) (1)	0.24	0.63	-0.47	-0.24	0.665	0.197	-1.28	-0.0025	0.46	-0.948	0.297
10001	MED6 || mediator of RNA polymerase II transcription, subunit 6 homolog (yeast) (1)	-0.125	0.105	0.255	-0.105	0.43	0.777	-0.47	-0.085	-2.31e-08	-0.868	0.085
10005	PTE1 || peroxisomal acyl-CoA thioesterase (2)	0.025	0.055	-0.025	-0.34	-0.63	0.037	0.885	-0.34	-0.02	1.21	0.34
10007	GNPDA1 || glucosamine-6-phosphate deaminase 1 (2)	-0.105	-0.465	0.41	0.105	-0.52	0.067	0.04	0.132	0.43	0.602	-0.578
10009	ZBTB33 || zinc finger and BTB domain containing 33 (2)	-0.02	-0.22	0.02	0.91	0.013	-1.79e-09	-0.042	0.175	0.323	-0.155	0.54
10010	TANK || TRAF family member-associated NFKB activator (4)	-0.315	0.052	-0.052	1.38	0.407	0.691	-0.155	0.559	1.07	0.108	0.616
10011	SRA1 || steroid receptor RNA activator 1 (3)	-0.102	-0.0875	0.198	0.0875	-0.0645	0.28	-0.0205	0.05	-0.47	-0.109	-0.05
10013	HDAC6 || histone deacetylase 6 (1)	0.69	0.47	-0.47	-0.63	0.18	-0.183	2.15e-08	0.04	0.2	-0.878	-0.535
10014	HDAC5 || histone deacetylase 5 (3)	-0.781	-0.151	0.498	0.151	-0.43	-1.11	0.7	0.034	1.64e-09	0.302	-0.848
10015	PDCD6IP || programmed cell death 6 interacting protein (1)	-0.15	0.15	-0.59	0.43	0.113	5.96e-09	-0.987	0.452	0.133	-0.865	0.152
10016	PDCD6 || programmed cell death 6 (2)	-0.0375	-0.422	0.203	0.0375	0.125	0.367	-0.47	0.28	0.455	0.387	0.914
10018	BCL2L11 || BCL2-like 11 (apoptosis facilitator) (3)	0.18	-0.23	0.17	-0.17	0.00333	-0.0147	1.83e-09	-0.668	-0.177	-0.332	0.262
10020	GNE || glucosamine (UDP-N-acetyl)-2-epimerase/N-acetylmannosamine kinase (1)	-0.01	-0.25	0.01	0.13	-0.12	0.227	-2.62e-08	0.27	3.54	-0.158	0.22
10024	TROAP || trophinin associated protein (tastin) (1)	0.04	0.03	-0.03	-0.29	-0.23	-0.573	0.57	-0.258	-2.31e-08	0.0117	-0.658
10025	THRAP5 || thyroid hormone receptor associated protein 5 (2)	-0.45	0.175	0.23	-0.175	-0.9	-0.168	1.43	-0.0975	-0.78	0.867	-1.66
10036	CHAF1A || chromatin assembly factor 1, subunit A (p150) (3)	0.245	0.115	-1.22	-0.115	-3.72e-08	-0.183	0.27	0.02	0.65	-0.448	-1.38
10038	PARP2 || poly (ADP-ribose) polymerase family, member 2 (2)	-0.0075	0.0075	-0.128	0.228	0.228	-1.49e-09	-0.727	-0.438	1.24	-0.39	1.64
10040	TOM1L1 || target of myb1-like 1 (chicken) (2)	-0.642	-0.302	0.507	0.302	-0.235	0.262	-0.64	-0.383	0.205	-0.563	0.397
10042	HMG2L1 || high-mobility group protein 2-like 1 (3)	-0.035	0.035	-0.585	0.945	0.25	0.067	-0.11	-0.128	0.23	-0.118	0.102
10049	DNAJB6 || DnaJ (Hsp40) homolog, subfamily B, member 6 (4)	0.073	-0.39	-0.073	0.167	0.093	0.448	-0.382	0.216	-0.449	-1.03	-0.216
10051	SMC4L1 || SMC4 structural maintenance of chromosomes 4-like 1 (yeast) (2)	-0.085	0.085	-0.365	0.5	1.12	0.752	-0.585	-0.0335	-0.075	0.142	0.159
10054	UBA2 || SUMO-1 activating enzyme subunit 2 (3)	-0.185	-0.08	0.08	0.518	0.17	0.404	-0.63	0.859	-7e-09	-0.333	0.368
10055	SAE1 || SUMO-1 activating enzyme subunit 1 (3)	-0.224	-0.283	0.224	0.353	-0.747	0.23	-0.207	-0.406	0.317	0.152	1.04
10056	FARSLB || phenylalanine-tRNA synthetase-like, beta subunit (2)	-0.185	-0.005	0.005	0.065	3.58e-09	0.472	-0.025	0.469	-0.42	0.365	0.873
10058	ABCB6 || ATP-binding cassette, sub-family B (MDR/TAP), member 6 (1)	0.28	0.51	-0.28	-1.07	-1.46e-08	0.087	0.265	-0.0025	0.15	-0.618	-0.887
10059	DNM1L || dynamin 1-like (3)	-0.139	-0.248	0.139	0.351	-2.98e-09	0.264	-0.09	-0.408	0.7	-0.185	0.0815
10061	ABCF2 || ATP-binding cassette, sub-family F (GCN20), member 2 (1)	-0.11	0.08	-0.08	0.33	-0.2	0.012	-2.86e-08	-0.0725	-0.21	-0.358	-0.517
10062	NR1H3 || nuclear receptor subfamily 1, group H, member 3 (2)	0.12	0.78	-0.12	-0.28	-0.55	0.032	0.065	-0.173	0.115	-0.0233	0.173
10063	COX17 || COX17 homolog, cytochrome c oxidase assembly protein (yeast) (2)	0.647	0.618	-0.998	-0.618	0.315	0.252	-1.52	-0.0525	0.31	-0.568	0.632
10066	SCAMP2 || secretory carrier membrane protein 2 (2)	0.12	-4.1e-09	-3.28e-09	-0.38	-0.885	-0.273	0.19	-0.353	0.86	2.03	1.83
10067	SCAMP3 || secretory carrier membrane protein 3 (3)	-0.025	0.125	0.025	-0.385	-0.987	2.79e-08	0.45	-0.005	0.3	1.47	-0.345
10072	DPP3 || dipeptidylpeptidase 3 (13)	-0.325	0.486	0.155	-0.155	-1.36	-0.945	0.48	-0.321	-2.53e-10	1.4	0.064
10073	RNUT1 || RNA, U transporter 1 (1)	0.07	-0.05	0.03	-0.03	5.07e-09	0.467	-0.12	0.14	0.57	-0.418	0.24
10076	PTPRU || protein tyrosine phosphatase, receptor type, U (1)	0.715	0.095	-0.095	-1.16	2.98e-10	-0.883	0.09	-0.675	0.53	-0.638	-0.565
10079	ATP9A || ATPase, Class II, type 9A (2)	-0.085	-0.3	0.085	0.085	0.598	2.24e-10	0.348	0.144	-0.162	-0.815	-0.401
10081	PDCD7 || programmed cell death 7 (2)	-2.98e-10	-0.215	0.02	0	-6.26e-09	-0.163	-0.205	0.052	-0.655	-0.228	-0.233
10090	UST || uronyl-2-sulfotransferase (2)	-0.58	0.02	-0.02	0.385	0.078	-1.79e-08	-0.347	0.235	0.168	-1.05	-0.235
10092	ARPC5 || actin related protein 2/3 complex, subunit 5, 16kDa (2)	-0.01	-0.1	0.01	1.17	0.128	0.36	-0.477	-0.47	-0.242	4.17e-09	1.73e-08
10093	ARPC4 || actin related protein 2/3 complex, subunit 4, 20kDa (1)	-0.12	0.19	0.12	-0.8	-0.477	3.73e-10	0.883	-0.738	0.723	1.07	0.202
10094	ARPC3 || actin related protein 2/3 complex, subunit 3, 21kDa (2)	0.228	0.417	-0.228	-0.677	7.45e-11	0.367	-1.23	-0.285	-0.115	-1.4	-0.256
10095	ARPC1B || actin related protein 2/3 complex, subunit 1B, 41kDa (2)	-0.08	0.69	0.08	-1.38	-0.12	0.007	-1.67e-08	-0.856	1.2	0.402	1
10096	ACTR3 || ARP3 actin-related protein 3 homolog (yeast) (1)	-0.225	-0.095	0.095	0.545	0.27	0.012	-1.3	-0.098	-4.47e-10	-0.948	0.027
10097	ACTR2 || ARP2 actin-related protein 2 homolog (yeast) (3)	-0.2	-0.36	0.2	1.03	0.48	0.567	-0.64	0.38	0.283	-0.608	0.71
10098	TSPAN5 || tetraspanin 5 (2)	-0.155	0.035	-0.035	0.845	0.0475	-0.305	-0.0475	0.167	0	-0.521	0.457
10099	TSPAN3 || tetraspanin 3 (2)	-0.195	0.195	0.485	-0.745	0.21	0.787	-0.35	0.562	-0.605	-0.353	-0.028
101	ADAM8 || a disintegrin and metalloproteinase domain 8 (1)	0.445	-0.185	0.185	-0.285	0.76	-0.233	1.02	-0.276	0	0.502	-0.991
10101	NUBP2 || nucleotide binding protein 2 (MinD homolog, E. coli) (2)	0.13	0.45	-0.13	-1.21	-0.65	-0.328	1.29	-0.38	-7e-09	1.46	0.16
10102	TSFM || Ts translation elongation factor, mitochondrial (2)	0.035	0.295	-0.035	-0.075	0.12	0.617	-9.54e-09	-1.55e-08	-0.435	-0.603	0.36
10105	PPIF || peptidylprolyl isomerase F (cyclophilin F) (1)	-0.015	0.015	0.275	-0.365	-0.23	-0.023	-0.22	0.117	1.12	1.31	1.4
10106	CTDSP2 || CTD (carboxy-terminal domain, RNA polymerase II, polypeptide A) small phosphatase 2 (1)	-0.175	-0.075	0.515	0.075	-0.16	-0.333	-1.19e-08	-0.775	1.91	1.5	0.535
10111	RAD50 || RAD50 homolog (S. cerevisiae) (1)	1	0.83	-1.47	-0.83	0.719	0.436	-0.561	0.22	0	-0.149	0.43
10112	KIF20A || kinesin family member 20A (2)	0.27	0.245	-0.28	-0.245	3.28e-09	0.067	-0.29	0.025	-0.24	-0.653	-0.885
10116	FEM1B || fem-1 homolog b (C. elegans) (1)	-0.01	0.01	-0.36	0.23	0.07	-0.123	-0.16	-0.225	1.1	0.122	1.58
10120	ACTR1B || ARP1 actin-related protein 1 homolog B, centractin beta (yeast) (1)	-0.005	0.565	0.005	-0.395	0.07	-0.163	0.3	0.262	6.11e-09	0.732	0.742
10121	ACTR1A || ARP1 actin-related protein 1 homolog A, centractin alpha (yeast) (2)	0.0475	0.0725	-0.0475	-0.412	-0.637	-0.63	0.0934	0.04	0.723	-2.56e-08	-0.15
10123	ARL7 || ADP-ribosylation factor-like 7 (2)	0.125	-0.125	0.295	-0.51	0.085	-0.178	-4.77e-09	-0.418	-0.06	-0.353	0.062
10126	DNAL4 || dynein, axonemal, light polypeptide 4 (1)	0.315	0.365	-0.315	-0.565	0.11	-0.043	0.56	0.117	-0.19	0.402	-0.053
10127	ZNF263 || zinc finger protein 263 (1)	0.05	3.88e-08	-0.56	0	2.47e-08	-0.353	-0.96	0.085	0.38	-0.538	0.775
10128	LRPPRC || leucine-rich PPR-motif containing (1)	-0.11	0.05	-0.05	0.31	0.45	0.307	-0.37	-0.14	-0.07	-0.508	0.14
10131	TRAP1 || TNF receptor-associated protein 1 (3)	-0.536	0.167	0.167	-0.167	-0.23	0.417	0.827	-0.263	-0.18	-0.138	0.0267
10133	OPTN || optineurin (1)	0.205	0.095	-1.16	-0.095	0.36	0.367	-0.59	0.055	-0.35	-1.25	-0.325
10135	PBEF1 || pre-B-cell colony enhancing factor 1 (5)	-0.637	-0.403	0.403	0.733	4.83e-09	0.541	-0.318	0.074	0.1	0.238	0.576
10137	RBM12 || RNA binding motif protein 12 (2)	0.0025	-0.0025	-0.0125	0.233	0.215	-0.423	-0.765	-0.095	1.25	0.0867	1.15
10139	ARFRP1 || ADP-ribosylation factor related protein 1 (2)	0.107	0.393	-0.107	-0.792	0.43	-0.103	1.21	-0.676	-0.47	-0.143	-0.592
10140	TOB1 || transducer of ERBB2, 1 (1)	0.125	-0.115	-0.095	0.095	-0.06	-0.353	-1.09	-0.125	0.98	0.552	2.77
10142	AKAP9 || A kinase (PRKA) anchor protein (yotiao) 9 (1)	0.335	0.325	-0.325	-0.635	0.416	0.173	0.386	0.995	0	-0.173	-0.125
10144	FAM13A1 || family with sequence similarity 13, member A1 (1)	0.015	-0.015	-0.105	1.08	0.14	-0.633	-3.58e-09	0.047	0.6	-0.573	0.282
10146	G3BP || Ras-GTPase-activating protein SH3-domain-binding protein (4)	-0.329	-0.094	0.094	0.781	-0.19	0.142	-0.475	0.027	1.34	0.829	0.564
10147	SFRS14 || splicing factor, arginine/serine-rich 14 (3)	0.335	0.265	-0.855	-0.265	0.43	0.117	0.457	0.357	-0.04	-0.698	-0.743
10148	EBI3 || Epstein-Barr virus induced gene 3 (1)	0.53	0.34	-0.34	-1	-0.245	-0.808	0.425	-0.105	-0.395	-0.563	-0.405
10152	ABI2 || abl interactor 2 (3)	-0.679	-0.203	0.65	0.203	0.523	0.634	0	-0.071	0.175	-0.173	-0.678
10156	RASA4 || RAS p21 protein activator 4 (2)	-0.138	2	-0.818	0.138	0.0375	-1.31	-0.0375	0.342	-2.19	1.1	-0.368
10159	ATP6AP2 || ATPase, H+ transporting, lysosomal accessory protein 2 (5)	-0.687	-0.176	0.176	0.322	0.118	0.947	0.094	0.22	-0.195	-0.0508	0.316
10160	FARP1 || FERM, RhoGEF (ARHGEF) and pleckstrin domain protein 1 (chondrocyte-derived) (2)	-5.21e-09	-4.1e-09	-0.34	0.03	-0.06	-0.428	0.205	-0.14	0	-0.368	-0.1
10163	WASF2 || WAS protein family, member 2 (2)	-0.04	-0.08	0.04	0.915	-0.77	-0.798	0.175	-0.416	1.07	0.227	-0.063
10165	SLC25A13 || solute carrier family 25, member 13 (citrin) (3)	-0.547	-0.427	0.427	0.793	0.14	0.367	0.186	0.218	-0.0437	-0.345	0.0855
10169	SERF2 || small EDRK-rich factor 2 (2)	0.347	0.453	-0.583	-0.347	-0.638	-0.461	0.187	0.17	-0.778	-0.107	-0.17
1017	CDK2 || cyclin-dependent kinase 2 (2)	-0.453	-0.223	0.637	0.223	-0.572	-2.5e-08	-0.297	-0.645	0.648	0.46	0.804
10171	RCL1 || RNA terminal phosphate cyclase-like 1 (3)	-0.416	-0.146	0.604	0.146	-0.533	0.694	-2.57e-08	0.0583	0.047	-0.0544	0.0963
10175	CNIH || cornichon homolog (Drosophila) (1)	-0.09	-0.03	0.03	0.25	-0.12	0.027	-1.29	0.56	1.81	1.96	2.56
10180	RBM6 || RNA binding motif protein 6 (1)	0.4	-0.21	-0.32	0.21	0.888	2.98e-08	0.153	0.122	-0.277	-0.465	-0.188
10186	LHFP || lipoma HMGIC fusion partner (1)	-0.175	0.175	-0.075	0.075	0.46	0.347	-2.38e-08	0.517	0.08	-0.258	0.188
10188	TNK2 || tyrosine kinase, non-receptor, 2 (1)	0.04	-0.04	0.14	-1.49	0.27	-0.823	0.95	-0.443	0.08	-0.278	-0.513
10189	THOC4 || THO complex 4 (2)	0.102	0.472	-0.102	-0.703	-0.25	0.022	0.74	-0.085	-1.02	-0.373	-0.86
1019	CDK4 || cyclin-dependent kinase 4 (3)	-0.0815	0.0815	0.189	-0.288	-1.17	-3.22e-08	0.463	-0.055	1.02	1.95	0.545
10190	TXNDC9 || thioredoxin domain containing 9 (1)	-0.545	-0.185	0.185	0.245	0.0965	0.0935	-0.614	0.365	0.117	0.438	0.425
10194	SDCCAG33 || serologically defined colon cancer antigen 33 (1)	0.01	-0.01	-0.87	0.23	-0.14	-0.533	-0.98	-0.16	0.54	-0.738	0.45
10195	ALG3 || asparagine-linked glycosylation 3 homolog (yeast, alpha-1,3-mannosyltransferase) (3)	0.255	0.045	-0.045	-0.465	-1.2	-2.74e-08	0.243	-0.165	-1.36	0.235	-1.17
10197	PSME3 || proteasome (prosome, macropain) activator subunit 3 (PA28 gamma; Ki) (1)	0.315	0.585	-0.315	-0.455	-0.33	-0.213	-0.2	-0.245	-0.09	0.00165	-0.845
10198	MPHOSPH9 || M-phase phosphoprotein 9 (1)	-0.415	-0.605	0.745	0.415	0.5	0.407	-0.725	0.378	0.63	-0.0483	0.128
102	ADAM10 || a disintegrin and metalloproteinase domain 10 (1)	-0.33	-0.07	0.07	0.98	0.294	0.251	-0.0958	0.38	0	0.0958	1.24
1020	CDK5 || cyclin-dependent kinase 5 (1)	0.15	-8.87e-09	-8.05e-09	-0.1	-0.24	0.057	0.48	0.385	-0.47	-0.178	0.035
10201	NME6 || non-metastatic cells 6, protein expressed in (nucleoside-diphosphate kinase) (2)	-0.0425	-0.0225	0.427	0.0225	-0.497	5.96e-09	0.018	-0.355	-0.002	0.16	0.065
10202	DHRS2 || dehydrogenase/reductase (SDR family) member 2 (1)	-0.3	0.3	-0.38	0.42	-0.44	-0.343	0.23	-1.74	-0.23	0.952	0.54
10204	NUTF2 || nuclear transport factor 2 (2)	-0.102	0.102	0.122	-0.767	-1.07	-1.31e-08	-0.937	0.167	0.493	0.835	0.947
10206	RFP2 || ret finger protein 2 (2)	0.27	0.06	-0.06	-0.19	0.418	-0.875	0.188	-0.125	0.438	2.38e-09	0.432
10208	C13orf22 || chromosome 13 open reading frame 22 (1)	-0.26	-0.37	0.26	0.39	0.33	0.517	-0.24	0.42	-0.1	0.552	0.31
10211	FLOT1 || flotillin 1 (3)	-0.055	0.302	0.055	-0.335	-0.307	3.93e-08	0.933	-0.502	1.1	2.1	0.065
10212	DDX39 || DEAD (Asp-Glu-Ala-Asp) box polypeptide 39 (3)	0.001	-0.001	0.243	-0.139	-0.207	0.074	0.22	0.0895	-0.16	0.189	-0.925
10217	CTDSPL || CTD (carboxy-terminal domain, RNA polymerase II, polypeptide A) small phosphatase-like (3)	-0.0775	-0.147	0.0775	0.362	-0.455	-0.098	0.36	0.0045	1.54	0.762	0.539
1022	CDK7 || cyclin-dependent kinase 7 (MO15 homolog, Xenopus laevis, cdk-activating kinase) (3)	-0.607	-0.387	0.643	0.387	0.928	1.5	-0.005	0.552	0.065	-0.215	0.297
10224	ZNF443 || zinc finger protein 443 (2)	0.477	0.177	-0.388	-0.177	0.307	0.0337	-0.278	0.265	0	-0.0267	0.625
10227	TETRAN || tetracycline transporter-like protein (2)	-0.02	0.02	0.29	-0.705	-0.222	-4.77e-09	1.27	0.075	-0.462	0.885	-1.42
10230	NBR2 || neighbor of BRCA1 gene 2 (1)	-0.49	-0.17	0.17	0.25	0.305	0.642	-0.12	0.163	-0.205	0.0867	0.677
10233	B7 || B7 gene (2)	0.425	0.985	-0.555	-0.425	0.146	-0.127	0.346	-0.28	0.577	-0.732	0.28
10236	HNRPR || heterogeneous nuclear ribonucleoprotein R (2)	-0.005	0.005	-0.025	0.825	0.1	0.647	0.57	1.09	-0.18	-0.488	0.215
10237	SLC35B1 || solute carrier family 35, member B1 (2)	-0.01	0.01	0.3	-0.145	-0.292	5.84e-08	0.158	0.292	0.938	2.19	1.55
10238	WDR68 || WD repeat domain 68 (1)	-0.005	0.005	0.195	-0.245	-0.67	-0.343	0.01	-0.25	-0.8	-0.238	-0.37
1024	CDK8 || cyclin-dependent kinase 8 (2)	-1.02	-0.328	0.328	0.797	0.05	0.207	-0.315	-0.336	1.36	0.712	0.369
10240	MRPS31 || mitochondrial ribosomal protein S31 (4)	-0.631	-0.231	0.816	0.231	0.482	0.554	-1.38	0.528	-0.155	-1.24	0.269
10243	GPHN || gephyrin (1)	-4.47e-10	0.16	-0.07	0	-0.037	2.98e-09	-0.817	0.197	0.163	-0.0454	1.74
10244	RAB9P40 || Rab9 effector p40 (2)	0.152	0.278	-0.158	-0.152	-0.14	0.277	0.08	-0.435	-0.465	-0.603	-0.0655
10247	HRSP12 || heat-responsive protein 12 (1)	-0.085	0.085	-0.615	0.575	0.59	0.687	-1.44	1.12	7.9e-09	-0.368	0.505
10248	POP7 || processing of precursor 7, ribonuclease P subunit (S. cerevisiae) (1)	-0.26	-5.22e-10	0.02	0	-0.432	0.0554	0.698	-0.005	-1	-2.98e-09	0.005
10250	SRRM1 || serine/arginine repetitive matrix 1 (4)	0.015	0.005	-0.005	-0.095	5.81e-08	0.517	-0.37	0.382	-0.14	-1.55	0.21
10252	SPRY1 || sprouty homolog 1, antagonist of FGF signaling (Drosophila) (2)	0.175	0.015	-0.305	-0.015	-0.135	-0.063	-0.29	-0.48	1.11	1.1	2.11
10253	SPRY2 || sprouty homolog 2 (Drosophila) (1)	-0.13	-0.18	0.13	0.57	-0.0085	0.0085	-1.07	0.19	1.51	0.813	0.72
10254	STAM2 || signal transducing adaptor molecule (SH3 domain and ITAM motif) 2 (1)	0.03	-0.04	-0.03	0.51	-0.0358	-0.439	-0.466	-0.073	0	0.0358	0.597
10257	ABCC4 || ATP-binding cassette, sub-family C (CFTR/MRP), member 4 (1)	-0.135	-0.565	0.135	0.765	0.663	-4.77e-09	0.183	-0.43	0.163	-0.0254	0.56
1026	CDKN1A || cyclin-dependent kinase inhibitor 1A (p21, Cip1) (1)	-0.1	0.09	0.18	-0.09	-0.4	0.017	-2.38e-09	-0.348	0.38	1.08	-1.02
10263	CDK2AP2 || CDK2-associated protein 2 (2)	0.48	-0.18	-0.01	0.01	-0.66	0.337	-0.64	-0.455	-8.79e-09	0.472	-0.495
10269	ZMPSTE24 || zinc metallopeptidase (STE24 homolog, yeast) (1)	-0.07	-0.16	0.07	0.1	-2.77e-08	0.247	-0.74	0.625	2.42	2.05	2.29
1027	CDKN1B || cyclin-dependent kinase inhibitor 1B (p27, Kip1) (1)	-0.005	-0.005	0.005	0.065	0.61	0.097	-0.64	-9.18e-08	0.15	-0.588	0.01
10270	AKAP8 || A kinase (PRKA) anchor protein 8 (1)	0.33	0.04	-0.7	-0.04	0.44	-0.043	-0.21	-0.273	0.35	-0.818	0.547
10274	STAG1 || stromal antigen 1 (2)	-0.5	2.16e-09	0.19	0	0.19	0.082	-5.96e-10	0.124	-0.14	-0.528	-0.42
10276	NET1 || neuroepithelial cell transforming gene 1 (1)	-0.105	-0.185	0.105	0.635	0.043	-1.31e-08	-0.787	-0.01	-0.327	-0.415	0.01
10277	UBE4B || ubiquitination factor E4B (UFD2 homolog, yeast) (2)	-0.295	-0.095	0.095	0.32	-0.085	0.042	1.43e-08	-0.12	0.115	-1.24	-0.453
10279	PRSS16 || protease, serine, 16 (thymus) (2)	0.165	0.135	-0.135	-0.215	-0.405	-0.948	0.115	-0.193	0.715	0.372	0.193
1028	CDKN1C || cyclin-dependent kinase inhibitor 1C (p57, Kip2) (1)	0.08	0.16	-0.08	-0.51	-0.247	-1.19e-09	0.713	0.612	0	3.46	-0.478
10280	OPRS1 || opioid receptor, sigma 1 (2)	-0.15	0.15	0.8	-0.56	-1.29	-0.698	-2.38e-09	-0.885	1.13	2.1	-0.085
10282	BET1 || BET1 homolog (S. cerevisiae) (1)	-0.065	-0.175	0.065	0.105	0.23	0.207	0	-0.275	-0.75	-0.898	0.275
10283	SDCCAG10 || serologically defined colon cancer antigen 10 (1)	0.37	4.83e-08	-0.24	0	0.29	0.217	-1.75	0.36	-0.39	-1.23	-0.36
10284	SAP18 || sin3-associated polypeptide, 18kDa (1)	0.025	-0.025	0.215	-0.295	0.58	-0.333	-0.47	0.383	1.6	0.582	1.04
10286	BCAS2 || breast carcinoma amplified sequence 2 (2)	-0.453	-0.347	0.438	0.347	0.83	0.762	-0.82	0.635	1.64e-09	-0.823	0.155
10287	RGS19 || regulator of G-protein signalling 19 (1)	0.255	0.355	-0.255	-0.805	-0.71	-0.723	0.96	0.095	-0.96	0.222	-1.25
10289	GC20 || translation factor sui1 homolog (1)	0.05	-0.05	-0.11	0.18	-0.22	0.167	-0.64	-0.05	2.94e-08	0.112	0.26
1029	CDKN2A || cyclin-dependent kinase inhibitor 2A (melanoma, p16, inhibits CDK4) (2)	-0.025	0.16	0.025	-0.695	-0.69	-0.073	0.89	-0.508	1.94e-09	0.942	0.449
10291	SF3A1 || splicing factor 3a, subunit 1, 120kDa (1)	0.425	0.405	-0.835	-0.405	-0.37	-0.253	0.08	-0.17	0.18	-0.128	-0.58
10293	TRIP || TRAF interacting protein (1)	0.235	0.225	-0.225	-0.395	-8.64e-09	-0.193	0.55	-0.748	1.06	0.922	0.642
10294	DNAJA2 || DnaJ (Hsp40) homolog, subfamily A, member 2 (2)	-0.185	-0.965	0.2	0.185	0.23	0.482	-1.49e-10	0.75	-0.48	-0.708	-0.566
10295	BCKDK || branched chain ketoacid dehydrogenase kinase (2)	0.0425	-0.0425	0.422	-0.497	-1.03	-0.683	0.04	-0.385	-1.83e-08	0.642	0.145
10298	PAK4 || p21(CDKN1A)-activated kinase 4 (2)	-0.095	0.095	0.155	-0.655	-0.365	-0.933	0.585	-0.275	0.365	0.517	-0.005
103	ADAR || adenosine deaminase, RNA-specific (1)	-0.095	-0.325	0.095	0.555	2.09e-09	0.187	0.29	-0.363	-0.92	-0.568	-0.403
1030	CDKN2B || cyclin-dependent kinase inhibitor 2B (p15, inhibits CDK4) (2)	-0.147	-0.113	0.113	0.233	0.55	0.167	-0.222	-0.407	-0.38	7.75e-10	0.163
10300	KATNB1 || katanin p80 (WD repeat containing) subunit B 1 (1)	-0.095	0.675	0.095	-0.395	-0.325	-0.688	1.4	-0.505	-0.205	0.697	-2.33
10301	DLEU1 || deleted in lymphocytic leukemia, 1 (1)	0.445	0.235	-0.235	-0.555	-0.347	-2.38e-09	-0.317	0.175	3.64	3.08	4.29
10302	SNAPC5 || small nuclear RNA activating complex, polypeptide 5, 19kDa (2)	-0.03	0.63	-1.19	0.03	0.323	4.41e-08	-0.327	-0.478	0.133	-1.27	0.312
10307	APBB3 || amyloid beta (A4) precursor protein-binding, family B, member 3 (1)	0.12	0.33	-0.12	-0.24	0.13	-0.403	0.7	-0.248	7.9e-09	0.202	-1.43
10308	ZNF267 || zinc finger protein 267 (1)	-0.33	-0.14	0.14	0.71	0.154	0.461	-1.87	0.735	0.0842	-0.0842	0.205
10309	UNG2 || uracil-DNA glycosylase 2 (1)	-0.03	0.36	0.03	-0.15	-0.24	-0.453	1.04	-0.05	-0.44	0.312	-0.35
1031	CDKN2C || cyclin-dependent kinase inhibitor 2C (p18, inhibits CDK4) (1)	0.095	0.135	-0.095	-0.365	0.189	0.526	-0.361	-0.273	0	0.171	0.554
10311	DSCR3 || Down syndrome critical region gene 3 (2)	-0.165	-0.325	0.555	0.165	-0.245	0.317	-0.265	-0.21	0.095	0.137	-0.246
10314	LANCL1 || LanC lantibiotic synthetase component C-like 1 (bacterial) (2)	-0.075	0.075	-0.22	0.29	-0.195	0.877	0.14	0.107	7.9e-09	0.292	0.338
10322	SMYD5 || SMYD family member 5 (1)	-0.005	0.085	-0.425	0.005	-0.2	-0.353	0.09	-0.235	-3.26e-08	-0.268	-1.77
10327	AKR1A1 || aldo-keto reductase family 1, member A1 (aldehyde reductase) (1)	0.525	0.205	-0.205	-0.405	-0.16	-0.493	-0.01	-0.653	0.96	0.932	0.847
10328	NOC4 || neighbor of COX4 (2)	0.115	0.005	-0.005	-0.365	-0.23	-0.003	0.85	-0.033	-0.35	0.472	-0.443
1033	CDKN3 || cyclin-dependent kinase inhibitor 3 (CDK2-associated dual specificity phosphatase) (3)	-0.365	-0.145	0.145	0.209	-0.07	0.657	-0.217	0.395	1.19	1.12	1.53
10330	TMEM4 || transmembrane protein 4 (1)	0.49	0.59	-0.49	-0.67	-0.07	0.017	-0.03	0.217	-2.83e-09	-0.348	0.347
10342	TFG || TRK-fused gene (2)	-0.855	-0.115	0.235	0.115	0.075	0.567	-1.59	0.22	-0.045	-0.0784	0.19
10352	WARS2 || tryptophanyl tRNA synthetase 2 (mitochondrial) (1)	-0.235	-0.625	0.305	0.235	-5.07e-09	-0.053	-0.27	0.382	-0.2	-0.698	-0.508
1036	CDO1 || cysteine dioxygenase, type I (1)	-0.345	-0.015	0.395	0.015	-0.115	-0.178	-0.535	-0.475	0	0.622	0.539
10360	NPM3 || nucleophosmin/nucleoplasmin, 3 (1)	-0.02	0.37	0.02	-0.37	-0.19	-0.203	-9.54e-09	-0.935	-0.84	-0.398	-0.665
10363	HMG20A || high-mobility group 20A (1)	0.07	-0.07	-0.52	0.14	-0.04	0.237	1.79e-09	0.835	-0.27	0.202	0.275
10365	KLF2 || Kruppel-like factor 2 (lung) (1)	-0.14	-0.21	0.62	0.14	0.085	-0.608	-0.975	-0.145	0	0.617	-0.775
10367	CBARA1 || calcium binding atopy-related autoantigen 1 (2)	-0.412	-0.0475	0.0575	0.0475	0.17	0.107	-0.535	0.519	-0.35	-1.71	0.184
10370	CITED2 || Cbp/p300-interacting transactivator, with Glu/Asp-rich carboxy-terminal domain, 2 (1)	-0.155	0.155	-0.175	0.215	-0.681	-0.474	-1.03	0.377	0	-0.349	-0.703
10380	BPNT1 || 3'(2'), 5'-bisphosphate nucleotidase 1 (3)	-0.1	0.1	-0.14	1.3	-0.028	0.565	0.122	0.599	-0.975	-0.246	-0.538
10383	TUBB2 || tubulin, beta, 2 (2)	0.05	0.275	-0.05	-0.55	-0.835	-0.083	0.305	-0.065	-0.26	0.487	0.065
10385	BTN2A2 || butyrophilin, subfamily 2, member A2 (3)	0.555	0.56	-0.555	-0.815	0.213	4.77e-09	-0.354	-0.21	0.303	-0.755	-0.304
10389	SCML2 || sex comb on midleg-like 2 (Drosophila) (1)	-0.175	-0.305	0.175	0.865	-7.45e-09	0.517	-0.27	0.385	0	0.532	0.835
1039	CDR2 || cerebellar degeneration-related protein 2, 62kDa (2)	-0.0475	0.198	-0.343	0.0475	0.178	0.295	-0.272	-0.386	0.0784	6.56e-09	0.7
10390	CEPT1 || choline/ethanolamine phosphotransferase 1 (1)	0.1	-0.02	0.02	-0.39	-0.087	-1.07e-08	0.043	1	-0.137	0.0347	0.055
103910	MRLC2 || myosin regulatory light chain MRLC2 (3)	-0.243	-0.373	0.243	0.252	-0.36	0.66	-0.31	-0.113	0.323	0.535	0.75
10393	ANAPC10 || anaphase promoting complex subunit 10 (1)	-0.055	-0.085	0.235	0.055	1.28e-08	0.287	-0.62	0.83	-0.96	0.312	0.48
104	ADARB1 || adenosine deaminase, RNA-specific, B1 (RED1 homolog rat) (1)	0.22	-0.13	0.13	-0.34	0.32	0.527	0.65	-0.253	0	-1.4	-0.922
10400	PEMT || phosphatidylethanolamine N-methyltransferase (2)	0.025	-0.025	0.125	-0.545	-1.22	-0.713	-0.07	-1.23	0.7	1.01	0.372
10412	TINP1 || TGF beta-inducible nuclear protein 1 (2)	0.125	-0.125	-0.915	0.145	0.51	0.232	-1.64	-0.295	7.9e-09	-1.18	0.975
10413	YAP1 || Yes-associated protein 1, 65kDa (2)	-0.135	-0.405	0.135	0.655	0.1	0.207	-0.05	0.23	1.46	-0.498	0.98
10418	SPON1 || spondin 1, extracellular matrix protein (1)	-0.06	1.97e-08	2.06e-08	0	-0.12	0.447	-0.2	0.39	0	-0.248	0.19
10419	SKB1 || SKB1 homolog (S. pombe) (2)	-0.583	-1.13	0.583	0.598	-1.03	0.097	-0.125	-0.373	-0.2	1.22	0.432
10421	CD2BP2 || CD2 antigen (cytoplasmic tail) binding protein 2 (3)	0.152	0.298	-0.152	-1.08	-0.3	0.587	1.23	0.0535	-0.58	0.979	-0.0535
10422	UBADC1 || ubiquitin associated domain containing 1 (1)	-0.22	0.46	0.22	-0.6	-0.457	-3.22e-08	0.643	-0.125	-0.697	0.135	-0.415
10423	CDIPT || CDP-diacylglycerol--inositol 3-phosphatidyltransferase (phosphatidylinositol synthase) (3)	0.137	0.117	-0.117	-0.536	-0.272	-1.79e-09	1.36	-0.139	-0.082	1.29	-0.165
10426	TUBGCP3 || tubulin, gamma complex associated protein 3 (1)	0.085	-0.085	-0.635	1.03	0.423	1.31e-08	0.253	-0.075	-0.397	-0.625	0.315
10428	CFDP1 || craniofacial development protein 1 (1)	0.15	2.93e-08	-0.55	0	0.65	0.667	-0.34	0.347	-3.74e-08	-1.08	-0.023
10432	RBM14 || RNA binding motif protein 14 (1)	0.26	0.37	-0.26	-0.36	0.14	-0.433	-0.06	-0.195	-0.28	-0.318	-1.48
10434	LYPLA1 || lysophospholipase I (3)	-0.502	-0.234	0.234	0.676	-0.138	0.465	0.005	1.08	3.13e-09	1.12	0.84
10435	CDC42EP2 || CDC42 effector protein (Rho GTPase binding) 2 (1)	0.19	0.25	-0.19	-0.62	-2.77e-08	-0.293	0.97	-1.15	-0.11	0.322	-0.2
10436	C2F || C2f protein (1)	0.09	-0.09	-0.46	0.18	0.12	0.247	1.91e-08	0.187	-0.92	-1.09	-0.353
10437	IFI30 || interferon, gamma-inducible protein 30 (2)	0.278	0.138	-0.138	-0.623	-0.44	0.062	-0.145	-0.045	0.27	0.0867	-0.045
10438	C1D || nuclear DNA-binding protein (2)	-0.155	0.015	-0.015	0.405	0.389	0.796	-0.286	1.69	-0.891	-0.264	-0.175
10445	MCRS1 || microspherule protein 1 (1)	1.94e-09	0.16	-0.08	0	-0.61	-0.433	0.78	-0.32	-0.13	0.582	-1.51
10447	FAM3C || family with sequence similarity 3, member C (3)	-0.13	-4.1e-09	-3.28e-09	1.48	1.03	0.957	-0.337	0.133	-0.077	-0.568	0.254
10449	ACAA2 || acetyl-Coenzyme A acyltransferase 2 (mitochondrial 3-oxoacyl-Coenzyme A thiolase) (4)	-0.586	-0.269	0.349	0.269	-0.0925	0.814	-0.528	-0.192	2.92	1.51	2.52
1045	CDX2 || caudal type homeo box transcription factor 2 (2)	0.412	0.858	-0.412	-0.593	-0.287	8.34e-09	0.903	-0.998	-0.207	-0.195	-0.642
10450	PPIE || peptidylprolyl isomerase E (cyclophilin E) (3)	0.13	0.166	-0.13	-1.01	-0.328	0.241	0.07	0.035	-0.373	-0.191	0.318
10452	TOMM40 || translocase of outer mitochondrial membrane 40 homolog (yeast) (2)	-0.135	0.135	0.165	-1.06	-0.225	-0.213	1.03	-0.295	-0.41	-0.138	-1.65
10454	MAP3K7IP1 || mitogen-activated protein kinase kinase kinase 7 interacting protein 1 (2)	0.67	0.59	-1.14	-0.59	1.86e-10	-0.823	0.225	0.061	0.07	-0.418	-1.1
10455	PECI || peroxisomal D3,D2-enoyl-CoA isomerase (1)	-0.15	-0.13	0.69	0.13	-0.01	0.177	-0.64	0.0275	2.77	0.902	1.21
10456	HAX1 || HCLS1 associated protein X-1 (2)	0.32	0.1	-0.1	-0.13	-0.75	-0.038	0.565	-0.242	0.005	1.09	0.0825
10458	BAIAP2 || BAI1-associated protein 2 (2)	0.848	0.0775	-0.292	-0.0775	-0.153	-0.366	1.09	-0.206	-0.508	0.153	-1.15
10460	TACC3 || transforming, acidic coiled-coil containing protein 3 (1)	0.19	0.6	-0.19	-0.27	-0.237	-3.22e-08	0.343	-0.58	-0.727	-1.27	-0.88
10463	SLC30A9 || solute carrier family 30 (zinc transporter), member 9 (2)	-0.555	-0.415	0.415	0.63	0.52	0.237	-0.39	0.81	7.3e-09	-0.488	0.27
10465	PPIH || peptidyl prolyl isomerase H (cyclophilin H) (2)	0.207	0.0975	-0.0975	-0.367	0.39	0.072	-0.725	0.04	-7.6e-09	-0.378	-0.04
10467	ZNHIT1 || zinc finger, HIT domain containing 1 (2)	0.407	0.172	-0.172	-0.713	-0.532	0	0.028	-0.02	0.068	-0.245	0.48
10469	TIMM44 || translocase of inner mitochondrial membrane 44 homolog (yeast) (2)	0.225	0.675	-0.225	-0.46	-0.075	-0.063	0.605	-0.035	-0.775	-0.0333	-1.26
10471	HKE2 || HLA class II region expressed gene KE2 (1)	0.15	2.93e-08	-1.24	0	0.45	0.717	0.11	-0.073	-0.83	-1.05	0.007
10472	ZNF238 || zinc finger protein 238 (1)	0.16	-0.07	0.07	-0.46	0.49	0.067	0.36	0.02	-0.07	-0.428	-0.243
10474	TADA3L || transcriptional adaptor 3 (NGG1 homolog, yeast)-like (1)	0.265	0.795	-0.265	-0.635	-0.367	-1.31e-08	1.3	-0.0175	-0.627	0.415	-2.16
10477	UBE2E3 || ubiquitin-conjugating enzyme E2E 3 (UBC4/5 homolog, yeast) (2)	-0.0675	0.0325	0.233	-0.0325	0.158	-2.27e-08	-0.244	-0.275	-0.657	-0.27	0.07
10479	SLC9A6 || solute carrier family 9 (sodium/hydrogen exchanger), isoform 6 (1)	-0.135	-0.295	0.255	0.135	0.348	-0.265	-1.02	-0.438	0.728	-2.56e-08	0.557
10480	GA17 || dendritic cell protein (2)	-0.292	-0.0525	0.482	0.0525	0.135	0.612	-0.8	0.475	-1.12e-08	-0.168	0.445
10481	HOXB13 || homeo box B13 (1)	-0.06	0.06	0.39	-0.87	-0.52	-0.623	0.91	-0.313	1.42	2.05	1.3
10482	NXF1 || nuclear RNA export factor 1 (1)	0.02	-0.06	0.02	-0.02	-0.427	-5.96e-09	-0.467	-0.558	1.42	0.565	0.902
10483	SEC23B || Sec23 homolog B (S. cerevisiae) (2)	-0.57	-0.1	0.1	0.505	0.185	0.612	-0.22	0.353	1.27e-08	-0.163	0.503
10484	SEC23A || Sec23 homolog A (S. cerevisiae) (1)	-0.37	-0.5	0.37	0.38	9.24e-09	0.077	-0.54	0.977	-0.37	-0.418	0.157
10486	CAP2 || CAP, adenylate cyclase-associated protein, 2 (yeast) (2)	-0.415	-0.02	0.02	0.46	0.15	0.057	5.96e-08	0.59	0.07	-0.158	0.48
10487	CAP1 || CAP, adenylate cyclase-associated protein 1 (yeast) (1)	-0.035	0.065	-0.335	0.035	2.68e-09	-0.038	-0.89	0.122	-0.2	-0.283	-0.122
10488	CREB3 || cAMP responsive element binding protein 3 (2)	0.0125	-0.0125	-0.0675	0.253	-0.19	0.147	0.315	-0.085	-0.25	0.0966	-0.57
10489	LRRC41 || leucine rich repeat containing 41 (1)	0.045	-0.045	0.235	-0.455	-0.54	-0.483	0.29	-0.11	1.27e-08	0.352	-0.89
10492	SYNCRIP || synaptotagmin binding, cytoplasmic RNA interacting protein (2)	-0.05	0.05	-0.52	0.06	0.485	0.172	-0.775	0.507	0.15	-0.603	1.52
10494	STK25 || serine/threonine kinase 25 (STE20 homolog, yeast) (3)	-0.155	-0.275	0.225	0.155	-0.577	-3.58e-09	1.42	0.165	-0.527	0.502	-1.42
10497	UNC13B || unc-13 homolog B (C. elegans) (1)	0.125	-0.125	-0.625	0.185	0.555	0.132	0.335	0.315	0	-0.733	-0.035
10498	CARM1 || coactivator-associated arginine methyltransferase 1 (2)	0.035	0.345	-0.035	-0.865	-0.0708	-0.169	0.494	-0.33	-0.161	-0.0242	-1.39
1050	CEBPA || CCAAT/enhancer binding protein (C/EBP), alpha (1)	0.065	0.115	-0.065	-0.535	-0.97	-0.733	-5.01e-08	-0.428	1.34	1.41	1.26
10500	SEMA6C || sema domain, transmembrane domain (TM), and cytoplasmic domain, (semaphorin) 6C (1)	-6.41e-09	0.09	-0.3	0	-0.492	-1.19	0.0825	0.017	-0.0825	0.349	-0.438
10505	SEMA4F || sema domain, immunoglobulin domain (Ig), transmembrane domain (TM) and short cytoplasmic domain, (semaphorin) 4F (1)	1.94e-09	-0.17	0.38	0	-0.19	-0.393	0.16	-1.36	0.16	-0.268	-0.695
1051	CEBPB || CCAAT/enhancer binding protein (C/EBP), beta (1)	0.285	0.265	-0.265	-1.02	0.065	-0.288	0.595	0.272	-0.515	0.847	-0.438
10512	SEMA3C || sema domain, immunoglobulin domain (Ig), short basic domain, secreted, (semaphorin) 3C (1)	-0.04	0.04	-0.42	0.37	0.681	0.0885	-0.0885	0.845	-0.269	-0.437	-0.045
10513	APPBP2 || amyloid beta precursor protein (cytoplasmic tail) binding protein 2 (1)	0.04	-1.84e-08	-0.46	0	3.28e-09	0.447	-1.06	1.19	0.05	0.0216	0.345
10514	MYBBP1A || MYB binding protein (P160) 1a (1)	0.465	0.385	-0.385	-1.25	0.638	-0.455	0.988	0.582	-0.452	-6.56e-09	-1.61
10518	CIB2 || calcium and integrin binding family member 2 (1)	0.105	0.355	-0.105	-0.455	-0.152	-0.165	1.12	-0.298	-0.302	-2.98e-10	-1.28
10520	ZNF211 || zinc finger protein 211 (1)	-0.535	-0.605	0.535	0.875	-0.1	0.397	0.2	-0.023	-0.17	0.732	0.047
10521	DDX17 || DEAD (Asp-Glu-Ala-Asp) box polypeptide 17 (10)	-0.085	0.085	-1.33	0.515	0.128	-0.0646	0.949	0.09	-0.272	-1.79e-09	0.04
10523	CHERP || calcium homeostasis endoplasmic reticulum protein (2)	0.268	0.458	-0.383	-0.268	0.328	-0.575	-0.0466	-0.383	0.0233	-1.79e-09	0.133
10524	HTATIP || HIV-1 Tat interacting protein, 60kDa (1)	0.22	2.45e-08	-0.06	0	-0.352	-0.275	0.678	-0.015	-0.492	1.73e-08	-0.235
10525	HYOU1 || hypoxia up-regulated 1 (1)	0.575	0.415	-0.415	-0.485	-0.62	-0.583	0.01	0.152	0.05	-0.368	-0.678
10526	IPO8 || importin 8 (2)	0.025	-0.025	-0.075	1.2	-0.28	0.097	-0.09	-0.133	0.95	0.0717	0.787
10527	IPO7 || importin 7 (1)	-0.33	-0.55	0.33	0.64	0.11	-0.043	0.075	0.77	0.11	-1.29	7.75e-09
10528	NOL5A || nucleolar protein 5A (56kDa with KKE/D repeat) (3)	0.21	0.26	-0.21	-1.08	0.26	0.237	0.1	-0.293	-0.09	-0.568	0.047
10529	NEBL || nebulette (24)	-0.035	-0.235	0.035	0.325	0.0325	0.13	-0.0325	0.181	0.168	0.454	0.288
10531	PITRM1 || pitrilysin metalloproteinase 1 (2)	0.02	-0.05	-0.02	0.39	0.168	-2.38e-09	-0.727	-0.105	0.078	-1.34	-0.045
10533	APG7L || APG7 autophagy 7-like (S. cerevisiae) (2)	0.285	0.145	-0.145	-0.2	-0.1	-0.218	0.045	-0.285	0.09	-0.133	0.065
10536	LEPREL2 || leprecan-like 2 (1)	0.09	1.15	-0.09	-1.63	-0.251	-0.214	0.789	0.07	-1.18	-0.209	-1.45
10539	TXNL2 || thioredoxin-like 2 (2)	-0.47	-0.425	0.455	0.425	0.25	0.277	-0.017	0.744	-0.145	-0.578	0.432
1054	CEBPG || CCAAT/enhancer binding protein (C/EBP), gamma (3)	-0.02	0.02	-0.23	0.305	0.386	0.493	-0.527	0.495	-0.104	-0.238	0.095
10541	ANP32B || acidic (leucine-rich) nuclear phosphoprotein 32 family, member B (2)	-0.725	0.915	0.015	-0.015	0.65	0.657	-0.89	0.16	-0.06	-2.4	0.19
10542	HBXIP || hepatitis B virus x interacting protein (2)	0.343	0.297	-0.482	-0.297	0.84	0.712	-7.15e-09	0.115	-0.345	-0.283	-0.02
10544	PROCR || protein C receptor, endothelial (EPCR) (1)	-0.02	0.06	0.02	-0.36	-0.28	0.577	0.04	-0.158	0.16	0.182	0.652
10548	TM9SF1 || transmembrane 9 superfamily member 1 (1)	-2.43e-08	-0.09	0.11	0	-0.32	-0.163	-2.15e-08	0.165	1.05	1.47	1.77
10549	PRDX4 || peroxiredoxin 4 (1)	0.025	0.355	-0.025	-0.335	-0.169	0.169	-0.719	-0.285	-1.04	0.593	0.345
10550	ARL6IP5 || ADP-ribosylation-like factor 6 interacting protein 5 (3)	-0.558	-0.211	0.211	0.288	0.167	0.484	-0.627	0.974	-0.4	-0.155	0.601
10552	ARPC1A || actin related protein 2/3 complex, subunit 1A, 41kDa (5)	-0.342	-0.116	0.366	0.116	9.24e-09	0.711	-0.634	-0.015	0.76	-0.202	0.329
10553	HTATIP2 || HIV-1 Tat interactive protein 2, 30kDa (1)	0.015	-0.015	0.165	-0.085	-0.12	0.207	-0.74	-0.133	1.96	1.21	3.11
10554	AGPAT1 || 1-acylglycerol-3-phosphate O-acyltransferase 1 (lysophosphatidic acid acyltransferase, alpha) (2)	0.16	0.86	-0.16	-0.5	-0.167	-0.3	1.31e-09	-0.368	-0.097	0.125	-1.09
10555	AGPAT2 || 1-acylglycerol-3-phosphate O-acyltransferase 2 (lysophosphatidic acid acyltransferase, beta) (2)	-0.235	0.235	0.62	-0.705	-0.17	-0.088	1.81	-0.025	-0.825	1.11	-1.57
10556	RPP30 || ribonuclease P/MRP 30kDa subunit (1)	-0.02	0.34	-0.03	0.02	0.47	0.487	-0.68	0.682	-0.25	-0.478	0.403
10558	SPTLC1 || serine palmitoyltransferase, long chain base subunit 1 (11)	-0.898	-0.314	0.314	0.781	-0.128	0.747	-0.265	0.377	1.18	1.04	1.98
10559	SLC35A1 || solute carrier family 35 (CMP-sialic acid transporter), member A1 (3)	-0.319	-0.121	0.121	0.474	0.617	0.844	0.063	-0.101	0.31	-0.193	0.419
10560	SLC19A2 || solute carrier family 19 (thiamine transporter), member 2 (2)	-0.667	-0.228	0.228	0.468	8.94e-10	0.372	-0.2	0.223	0.88	1.02	1.57
10566	AKAP3 || A kinase (PRKA) anchor protein 3 (1)	0.075	-0.075	-0.475	0.415	5.96e-10	-0.233	0.55	0.11	-0.61	0.232	-1.65
10567	RABAC1 || Rab acceptor 1 (prenylated) (2)	0.24	0.08	-0.08	-0.635	-0.312	2.98e-08	0.428	-0.308	-0.372	0.46	-0.238
10571	SMA3 || SMA3 (1)	0.035	-0.035	0.235	-0.405	0.168	0.575	0.698	0.667	-0.212	-4.17e-09	-0.573
10572	SIVA || CD27-binding (Siva) protein (2)	0.135	0.035	-0.035	-0.815	-0.625	-0.078	0.18	-0.0275	0.34	1.79	0.361
10573	MRPL28 || mitochondrial ribosomal protein L28 (1)	0.205	0.415	-0.205	-0.945	-0.07	-0.033	0.97	-0.05	-0.49	-0.258	-0.42
1058	CENPA || centromere protein A, 17kDa (1)	-0.31	-0.24	0.33	0.24	-0.24	0.437	0.59	-0.055	-0.55	0.252	0.055
10581	IFITM2 || interferon induced transmembrane protein 2 (1-8D) (2)	0.163	0.0275	-0.0275	-0.573	-1.39	-0.563	-0.515	-0.548	1.81	2.22	2.46
10585	POMT1 || protein-O-mannosyltransferase 1 (2)	0.917	0.0175	-0.0175	-0.0825	0.01	-1.05	0.222	-0.365	-0.96	0.0617	-0.475
10588	MTHFS || 5,10-methenyltetrahydrofolate synthetase (5-formyltetrahydrofolate cyclo-ligase) (1)	-0.015	0.015	0.095	-0.475	0.38	-0.068	-0.2	-0.0075	0.01	0.832	0.522
10594	PRPF8 || PRP8 pre-mRNA processing factor 8 homolog (yeast) (1)	0.25	-0.2	-0.25	0.2	0.28	-0.033	0.45	-0.418	-0.02	-0.818	-1.02
10597	SEDLP || spondyloepiphyseal dysplasia, late, pseudogene (1)	-0.335	-0.275	0.575	0.275	-0.156	0.381	0.184	-0.018	0	0.156	0.332
1060	CENPC1 || centromere protein C 1 (2)	-0.0625	0.0625	0.158	-0.0625	0.688	1.79e-09	-0.197	-0.113	-0.112	-0.25	0.113
10600	USP16 || ubiquitin specific protease 16 (1)	-0.1	0.1	-0.69	0.91	0.649	0.496	-1.98	0.485	1.16	0.331	0.025
10605	PAIP1 || poly(A) binding protein interacting protein 1 (2)	0.06	-0.28	-0.06	0.565	-0.098	0.069	-1.91e-09	0.255	0.367	0.889	0.182
10607	TBL3 || transducin (beta)-like 3 (1)	0.045	0.295	-0.045	-0.815	-0.29	-0.463	1.85	-0.475	-4.02e-09	1	-0.905
10608	MXD4 || MAX dimerization protein 4 (1)	0.43	0.27	-0.27	-1.42	-0.6	-0.903	0.76	-0.248	0	0.00165	-1.67
10609	SC65 || synaptonemal complex protein SC65 (1)	0.29	0.24	-0.24	-0.48	-0.01	-0.443	0.15	0.267	-0.38	-0.678	-0.263
10611	PDLIM5 || PDZ and LIM domain 5 (2)	0.005	0.245	-0.425	-0.005	0.153	-1.79e-08	-0.537	-0.165	0.313	-0.535	0.469
10613	SPFH1 || SPFH domain family, member 1 (1)	-0.09	-0.25	0.11	0.09	-0.237	-2.74e-08	-0.117	0.38	0.853	0.135	1.54
10614	HIS1 || HMBA-inducible (2)	0.08	-0.08	0.41	-0.25	0.545	-0.273	2.62e-08	-0.435	0.66	-0.978	0.185
10615	SPAG5 || sperm associated antigen 5 (1)	-0.04	0.04	-0.31	0.07	-0.06	0.777	7.15e-09	0.225	-0.09	-1.28	-1.06
10616	C20orf18 || chromosome 20 open reading frame 18 (1)	-0.3	0.11	-1.19e-09	0	-0.32	-0.083	0.45	0.17	1.36	0.942	-0.76
10617	STAMBP || STAM binding protein (1)	-0.24	-0.15	0.23	0.15	0.123	2.74e-08	-0.292	0.145	-0.202	0.0296	0.78
10618	TGOLN2 || trans-golgi network protein 2 (1)	-1.04e-09	-0.28	0.17	0	0.063	6.56e-09	-0.397	-0.196	0.533	0.135	0.904
1062	CENPE || centromere protein E, 312kDa (1)	0.33	0.36	-0.5	-0.33	0.695	0.462	0.295	0.19	0	-0.373	0.2
10623	POLR3C || polymerase (RNA) III (DNA directed) polypeptide C (62kD) (1)	-0.055	-0.005	0.485	0.005	0.49	0.307	-0.64	-0.123	-2.31e-08	-0.878	-0.503
10625	IVNS1ABP || influenza virus NS1A binding protein (2)	0.0825	-0.0825	-0.388	1.09	0.113	1.43e-08	-0.837	0.0495	0.093	-0.38	0.364
10626	TRIM16 || tripartite motif-containing 16 (1)	-0.01	0.49	0.01	-0.16	-0.05	-0.263	0.13	0.037	0.27	-0.138	0.072
10627	MRCL3 || myosin regulatory light chain MRCL3 (1)	-0.04	-0.13	0.28	0.04	-8.94e-10	0.297	-0.22	-0.04	-0.42	-0.218	0.02
10628	TXNIP || thioredoxin interacting protein (1)	-0.235	-0.285	0.235	0.255	2.95e-08	0.037	-0.4	-0.258	0.05	0.0216	0.492
10629	TAF6L || TAF6-like RNA polymerase II, p300/CBP-associated factor (PCAF)-associated factor, 65kDa (1)	0.115	0.215	-0.115	-1.65	-0.86	-0.433	1.1	0.145	-0.55	0.692	-1.52
10632	ATP5L || ATP synthase, H+ transporting, mitochondrial F0 complex, subunit g (3)	0.333	0.237	-0.237	-0.247	0.704	0.964	-0.05	0.183	1.79e-08	-0.00835	-0.183
10635	RAD51AP1 || RAD51 associated protein 1 (4)	-0.0799	0.0799	-0.407	0.608	-2.34e-08	0.282	-0.732	0.356	1.99	1.36	3.19
10636	RGS14 || regulator of G-protein signalling 14 (1)	0.275	0.155	-0.215	-0.155	-0.796	-0.479	0.534	0.05	-0.246	0.246	-0.05
10642	IMP-1 || IGF-II mRNA-binding protein 1 (3)	0.099	0.005	-0.005	-0.318	-0.275	0.019	0.342	0.3	-0.535	-0.623	-0.453
10643	IMP-3 || IGF-II mRNA-binding protein 3 (2)	0.0225	0.113	-0.253	-0.0225	0.105	-0.158	-7.15e-09	-1.34e-09	0.245	-0.153	0.27
10644	IMP-2 || IGF-II mRNA-binding protein 2 (2)	0.155	0.355	-0.29	-0.155	0.48	0.017	-0.565	0.647	9.09e-09	-1.35	-0.228
10650	C18orf43 || chromosome 18 open reading frame 43 (1)	0.11	0.02	-0.02	-0.49	1.76e-08	-0.563	0.09	-1.01	0.37	0.222	-0.168
10651	MTX2 || metaxin 2 (1)	0.04	-1.12e-09	-0.03	0	0.13	0.347	2.68e-09	0.88	-0.52	-0.308	0.04
10654	PMVK || phosphomevalonate kinase (1)	1.86e-08	0.45	-0.47	0	-0.877	1.55e-08	0.333	-0.32	-1.69	0.105	-0.03
10656	KHDRBS3 || KH domain containing, RNA binding, signal transduction associated 3 (1)	0.05	0.38	-0.41	-0.05	5.33e-08	-0.003	0.04	0.23	-0.14	-0.638	0.519
10657	KHDRBS1 || KH domain containing, RNA binding, signal transduction associated 1 (2)	-0.225	0.225	-0.285	0.695	-1.58e-08	0.307	-1.04	0.875	-0.04	-1.02	0.355
10658	CUGBP1 || CUG triplet repeat, RNA binding protein 1 (2)	-0.22	-0.08	0.245	0.08	0.015	0.287	0.1	0.204	-0.535	-0.0284	-0.425
10659	CUGBP2 || CUG triplet repeat, RNA binding protein 2 (2)	0.015	-0.39	9.84e-09	0	-0.202	-1.12e-10	-0.097	0.217	-0.137	-0.365	0.807
10664	CTCF || CCCTC-binding factor (zinc finger protein) (2)	-0.275	0.035	-0.035	1.44	0.47	0.117	-0.075	-0.215	0.26	-0.718	-0.165
10667	FARS2 || phenylalanine-tRNA synthetase 2 (mitochondrial) (1)	0.07	-0.05	0.05	-0.49	0.22	0.197	-0.01	-0.06	-0.74	-0.108	0.06
10668	CGRRF1 || cell growth regulator with ring finger domain 1 (1)	-0.665	-0.235	0.235	0.255	0.16	0.717	4.05e-08	1.09	-0.99	0.622	0.6
10671	DCTN6 || dynactin 6 (3)	1.46e-09	2.58e-09	-0.094	0.066	0.913	1.02	-0.107	0.562	-0.14	-0.578	-0.255
10672	GNA13 || guanine nucleotide binding protein (G protein), alpha 13 (2)	-0.158	-0.297	0.158	0.583	2.24e-08	-0.358	-0.462	-0.113	1.86	1.03	1.11
10675	CSPG5 || chondroitin sulfate proteoglycan 5 (neuroglycan C) (1)	-0.655	0.265	-0.115	0.115	0.72	-0.033	-0.03	0.225	-5.17e-08	0.282	-0.225
10678	B3GNT1 || UDP-GlcNAc:betaGal beta-1,3-N-acetylglucosaminyltransferase 1 (1)	-0.045	-0.145	0.045	0.255	-3.87e-09	-0.143	-0.46	-0.015	1	0.692	1.35
10682	EBP || emopamil binding protein (sterol isomerase) (2)	0.22	0.165	-0.165	-0.565	-0.125	0.262	0.365	0.072	-0.02	0.712	0.207
10683	DLL3 || delta-like 3 (Drosophila) (2)	0.497	0.207	-0.207	-0.482	-0.785	0.162	0.63	0.105	-0.625	0.457	0.005
10687	PNMA2 || paraneoplastic antigen MA2 (1)	-0.08	0.08	-4.12	1.4	8.94e-10	0.267	-0.25	0.455	-0.53	-0.588	0.445
1069	CETN2 || centrin, EF-hand protein, 2 (1)	-0.2	6.71e-10	0.12	0	-0.38	0.077	-0.94	-0.673	0.74	0.0717	1.1
10693	CCT6B || chaperonin containing TCP1, subunit 6B (zeta 2) (1)	0.13	-7.67e-09	-0.22	0	0.618	0.675	-0.152	0.742	0	-1.64e-09	0.322
10694	CCT8 || chaperonin containing TCP1, subunit 8 (theta) (2)	-0.412	-0.297	0.652	0.297	0.623	1.28	-0.43	0.634	-0.372	5.36e-09	0.041
10695	TNRC5 || trinucleotide repeat containing 5 (2)	0.427	0.398	-0.398	-0.777	-0.69	-0.043	0.375	0.095	-0.48	0.272	-0.545
10712	C1orf2 || chromosome 1 open reading frame 2 (1)	0.065	-0.065	0.265	-0.625	-0.15	-0.753	-3.58e-09	-1	1.14	1.3	0.106
10713	USP39 || ubiquitin specific protease 39 (4)	-0.421	-0.234	0.259	0.234	-0.14	0.392	-0.105	0.0375	-0.218	0.297	0.36
10714	POLD3 || polymerase (DNA-directed), delta 3, accessory subunit (1)	0.02	-0.01	-2.38e-09	0	0.465	0.392	-1.19e-09	0.484	-0.045	-0.213	-0.15
10715	LASS1 || LAG1 longevity assurance homolog 1 (S. cerevisiae) (2)	0.03	0.01	-0.01	-0.86	-0.215	-0.503	1.13	-0.245	-1.04e-09	0.707	-0.15
10717	AP4B1 || adaptor-related protein complex 4, beta 1 subunit (2)	-0.15	-0.06	0.185	0.06	0.03	0.607	0.21	0.0025	-0.39	-0.0184	-0.0925
10721	POLQ || polymerase (DNA directed), theta (1)	-0.195	0.225	-0.245	0.195	0.369	0.386	-0.921	0.87	0.559	0.0308	0.39
10723	SLC12A7 || solute carrier family 12 (potassium/chloride transporters), member 7 (1)	0.23	0.03	-0.03	-0.11	0.74	-0.183	1.14	0.097	-0.36	-0.328	0.137
10724	MGEA5 || meningioma expressed antigen 5 (hyaluronidase) (2)	-0.075	-0.145	0.225	0.075	-0.19	0.222	0.165	0.217	0.02	0.0316	0.338
10725	NFAT5 || nuclear factor of activated T-cells 5, tonicity-responsive (1)	0.31	-2.91e-09	-0.14	-4.92e-09	-0.122	0.0254	-0.0316	-0.105	0.548	3.58e-09	0.505
10726	NUDC || nuclear distribution gene C homolog (A. nidulans) (1)	-0.82	-0.22	0.22	2.34	0.646	-0.0473	-0.144	-0.32	0	0.0473	-0.26
10730	YME1L1 || YME1-like 1 (S. cerevisiae) (3)	-0.855	0.295	-0.295	0.49	0.14	0.332	-0.558	-0.003	-0.18	-0.683	0.277
10732	TCFL5 || transcription factor-like 5 (basic helix-loop-helix) (1)	0.11	0.1	-0.1	-0.64	0.311	0.178	0.842	-0.253	-0.518	0.643	0.087
10733	PLK4 || polo-like kinase 4 (Drosophila) (1)	-0.18	-0.32	0.18	0.46	0.68	0.237	-0.04	-0.2	0.47	0.342	0.68
10735	STAG2 || stromal antigen 2 (2)	-0.135	0.135	-0.265	0.89	-1.82e-08	0.342	-0.49	1.01	-0.88	-0.188	-0.11
10736	SIX2 || sine oculis homeobox homolog 2 (Drosophila) (1)	-0.07	0.24	0.07	-0.55	-0.64	-1.24	-1.43e-08	-0.535	1	0.502	0.095
10741	RBBP9 || retinoblastoma binding protein 9 (1)	3.13e-09	-0.08	0.23	0	-0.07	-0.063	5.96e-10	0.263	1.41	1.42	1.57
10743	RAI1 || retinoic acid induced 1 (1)	0.27	0.16	-0.16	-1.19	1.33	-0.243	0.55	-0.038	-1.64e-09	-0.248	-0.278
10744	PTTG2 || pituitary tumor-transforming 2 (1)	-0.035	-0.015	0.015	0.235	-0.54	0.217	-0.57	-0.063	1.46	1.59	1.32
10745	PHTF1 || putative homeodomain transcription factor 1 (1)	0.03	0.22	-0.06	-0.03	0.77	0.197	-0.58	-0.655	0.17	0.222	1
10746	MAP3K2 || mitogen-activated protein kinase kinase kinase 2 (1)	-0.26	-0.14	0.14	1.6	0.656	0.563	-0.674	0.385	0.996	-0.563	0.815
1075	CTSC || cathepsin C (7)	0.00522	0.0679	-0.00522	-0.136	-0.524	-2.5e-08	-0.686	-0.0818	-0.783	-0.645	0.252
10755	RGS19IP1 || regulator of G-protein signalling 19 interacting protein 1 (2)	-0.172	0.507	0.172	-0.897	-0.015	-0.273	1.2	-0.06	-0.57	1.02	-1.56
10758	TRAF3IP2 || TRAF3 interacting protein 2 (1)	-0.48	-2.56e-08	0.4	0	-0.4	0.157	-0.05	0.235	0.43	0.262	0.0297
10761	PLAC1 || placenta-specific 1 (1)	-1.64e-09	-0.02	0.46	0	-0.537	-2.27e-08	0.023	-0.46	-0.407	0.205	0.46
10762	NUP50 || nucleoporin 50kDa (2)	-0.28	-0.52	0.28	0.455	0.823	0.918	-0.447	-0.0375	0.508	-4.1e-10	0.0375
10765	JARID1B || Jumonji, AT rich interactive domain 1B (RBP2-like) (1)	0.23	0.05	-0.05	-0.07	0.518	-0.115	0.298	-0.418	0.438	1.49e-08	0.322
10766	TOB2 || transducer of ERBB2, 2 (1)	-0.035	0.035	-0.065	0.185	0.32	-0.093	-0.7	0.062	0.39	-0.408	0.062
10767	HBS1L || HBS1-like (S. cerevisiae) (1)	-0.04	0.14	0.01	-0.01	0.44	0.127	-1.25	0.21	0.09	-0.958	0.25
10772	FUSIP1 || FUS interacting protein (serine-arginine rich) 1 (1)	-0.02	0.05	-0.27	0.02	0.53	0.097	-0.5	0.385	-0.14	0.0717	0.135
10775	POP4 || processing of precursor 4, ribonuclease P/MRP subunit (S. cerevisiae) (1)	-0.035	0.095	0.035	-0.065	0.15	0.587	-3.58e-09	0.165	-0.39	-0.0683	0.295
10776	ARPP-19 || cyclic AMP phosphoprotein, 19 kD (2)	-0.0375	-0.0125	0.0125	0.273	-0.305	-0.068	2.86e-08	-0.833	1.4	0.857	1.47
10778	ZNF271 || zinc finger protein 271 (1)	0.01	-0.22	0.21	-0.01	1.76e-08	0.387	-1	0.74	0.82	0.182	1.18
10781	ZNF266 || zinc finger protein 266 (1)	0.05	0.03	-0.46	-0.03	-0.147	-3.58e-09	-0.077	0.01	0.943	0.735	-0.01
10782	ZNF274 || zinc finger protein 274 (1)	0.055	-0.055	-0.945	0.055	0.46	0.217	-1.02	-0.0955	7.9e-09	-0.228	-0.0305
10785	WDR4 || WD repeat domain 4 (3)	-0.132	0.088	0.012	-0.012	-0.0573	1.38e-10	0.956	-0.433	0.006	0.455	0.513
10787	NCKAP1 || NCK-associated protein 1 (1)	-0.29	-0.19	0.19	0.47	0.368	0.115	-0.672	0.025	-0.332	3.64e-08	-0.025
10793	ZNF273 || zinc finger protein 273 (4)	-0.416	0.0565	-0.0565	0.279	0.4	0.247	-0.7	0.545	0.51	0.162	0.665
10795	ZNF268 || zinc finger protein 268 (1)	-0.04	-0.17	0.04	0.57	-6.26e-09	0.667	-0.925	0.33	0.56	-0.528	0.95
10797	MTHFD2 || methylenetetrahydrofolate dehydrogenase (NADP+ dependent) 2, methenyltetrahydrofolate cyclohydrolase (2)	-0.315	-0.265	0.515	0.265	5.66e-09	0.517	0.105	0.77	-0.34	-0.303	-0.06
10801	SEPT9 || septin 9 (1)	0.17	0.2	-0.17	-1.24	0.08	-1.01	9.54e-09	-0.893	0.55	0.0717	0.907
10806	SDCCAG8 || serologically defined colon cancer antigen 8 (1)	0.345	-0.015	0.015	-0.245	0.57	0.647	4.77e-09	0.512	-0.18	-0.508	0.862
10807	SDCCAG3 || serologically defined colon cancer antigen 3 (4)	-0.0585	0.0235	0.0165	-0.0165	-0.422	-0.561	0.63	-0.392	-0.412	0.0541	-0.032
10808	HSPH1 || heat shock 105kDa/110kDa protein 1 (2)	-0.417	-0.438	0.417	0.453	0.665	0.802	-0.725	0.0345	0.625	-0.558	0.494
10809	STARD10 || START domain containing 10 (4)	0.115	0.28	-0.115	-1.05	-0.542	0.0184	0.673	0.253	-1.1	-1.19e-09	-1.61
10813	UTP14A || UTP14, U3 small nucleolar ribonucleoprotein, homolog A (yeast) (1)	0.305	0.045	-0.105	-0.045	0.36	0.337	0.19	5.13e-08	-0.58	-0.238	0.14
10814	CPLX2 || complexin 2 (1)	-0.035	0.035	0.035	-0.815	-0.291	-0.694	0.709	-0.163	-0.000825	0.000825	-0.243
10817	FRS3 || fibroblast growth factor receptor substrate 3 (1)	-0.25	0.04	-3.67e-08	0	-0.851	-0.594	0.619	-0.01	-1.06	0.231	-1.55
10827	C5orf3 || chromosome 5 open reading frame 3 (1)	0.075	-0.075	-0.315	0.355	0.139	-0.0738	0.0292	0.275	0.699	-0.0292	0.265
10838	ZNF275 || zinc finger protein 275 (2)	-0.163	-0.482	0.163	0.652	-0.34	-0.153	0.075	0.0425	0.535	-0.123	-0.0425
10844	TUBGCP2 || tubulin, gamma complex associated protein 2 (1)	-0.31	0.17	0.01	-0.01	-0.3	0.237	0.9	-0.145	-0.62	-0.0483	-1.65
10847	SRCAP || Snf2-related CBP activator protein (1)	0.72	0.6	-0.6	-0.82	-0.04	0.107	0.57	0.0075	-0.17	-0.173	-0.287
10848	PPP1R13L || protein phosphatase 1, regulatory (inhibitor) subunit 13 like (1)	0.35	0.32	-0.32	-0.9	-0.1	-0.463	0.37	-0.958	1.52	0.582	0.502
10858	CYP46A1 || cytochrome P450, family 46, subfamily A, polypeptide 1 (1)	0.19	-2.78e-17	-0.07	0	-0.45	0.117	0.54	-0.805	-0.22	1.61	0.115
10865	ARID5A || AT rich interactive domain 5A (MRF1-like) (1)	0.515	0.665	-0.515	-1.23	0.488	-0.935	0.978	-0.04	-0.282	1.01e-08	-1.22
10867	TSPAN9 || tetraspanin 9 (2)	0.265	0.04	-0.04	-0.8	0.283	-0.68	0.543	-0.36	-0.0216	5.96e-10	-0.075
10869	USP19 || ubiquitin specific protease 19 (1)	0.125	-0.055	-0.085	0.055	0.07	-0.253	0.87	-0.02	-0.31	-0.308	-1.01
10874	NMU || neuromedin U (1)	-0.09	0.15	0.09	-0.27	-0.087	-1.19e-09	-0.247	0.467	0.693	0.905	2.09
10882	C1QL1 || complement component 1, q subcomponent-like 1 (1)	0.075	0.055	-0.055	-0.955	-0.38	-0.743	1.04	-0.395	-0.97	0.272	-1.85
10884	MRPS30 || mitochondrial ribosomal protein S30 (1)	0.02	-0.02	0.32	-0.07	-0.18	0.407	-0.27	0.182	-0.67	-0.168	-0.008
10885	WDR3 || WD repeat domain 3 (1)	-0.405	-0.395	0.395	0.605	0.46	0.277	0.17	0.223	4.32e-09	-0.698	-0.223
10890	RAB10 || RAB10, member RAS oncogene family (3)	-0.105	0.128	-0.132	0.105	-0.04	-3.8e-10	-0.457	0.314	0.255	0.192	0.416
10898	CPSF4 || cleavage and polyadenylation specific factor 4, 30kDa (1)	0.05	0.21	-0.05	-0.6	3.9e-08	-0.563	0.69	-0.925	0.77	0.642	0.045
10901	DHRS4 || dehydrogenase/reductase (SDR family) member 4 (2)	0.12	0.46	-0.13	-0.12	-0.01	0.017	-0.49	-0.02	0.25	-0.193	0.02
10904	BLCAP || bladder cancer associated protein (1)	0.005	-0.005	0.135	-0.495	-0.41	-0.153	-0.195	-0.07	1.33	0.942	0.52
10906	TRAFD1 || TRAF-type zinc finger domain containing 1 (2)	-0.265	0.255	-0.015	0.015	-0.947	2.68e-09	-0.137	-0.415	0.743	1.18	0.415
10907	TXNL4A || thioredoxin-like 4A (1)	0.23	0.03	-0.03	-0.9	-0.18	0.017	0.01	-0.131	0.02	0.482	0.585
10910	SUGT1 || SGT1, suppressor of G2 allele of SKP1 (S. cerevisiae) (2)	-0.01	-0.065	0.12	0.01	0.948	0.4	-0.427	0.228	1.01	-4.77e-09	1.49
10914	PAPOLA || poly(A) polymerase alpha (3)	-0.501	-0.382	0.382	1.03	0.21	0.274	-0.043	0.0103	0.647	-0.0954	0.591
10915	TCERG1 || transcription elongation regulator 1 (2)	2.1e-08	-0.18	0.195	0	-0.465	-1.06	2.38e-09	-0.173	0.745	0.377	0.907
10916	MAGED2 || melanoma antigen family D, 2 (2)	-0.168	0.0675	0.163	-0.0675	-0.09	0.147	0.542	-0.14	7.45e-10	0.667	-0.447
10919	BAT8 || HLA-B associated transcript 8 (1)	0.265	-0.315	0.115	-0.115	0.18	-0.333	0.105	-0.191	-0.01	-1.04	-0.466
10921	RNPS1 || RNA binding protein S1, serine-rich domain (2)	0.08	0.2	-0.08	-0.315	-0.585	-0.368	0.17	-0.145	0.08	-0.428	-1.23
10922	FASTK || Fas-activated serine/threonine kinase (5)	-0.115	0.115	0.535	-0.387	-0.102	-0.167	1.51	-0.19	-2.6e-08	1.38	-0.53
10923	PC4 || activated RNA polymerase II transcription cofactor 4 (2)	-0.362	-0.158	0.158	0.432	-1.49e-09	0.537	-0.085	0.115	-0.32	0.577	0.535
10927	SPIN || spindlin (1)	0.05	-0.12	-0.05	0.53	-0.257	-1.07e-08	-0.117	0.255	0.753	0.165	0.855
10929	SRP46 || Splicing factor, arginine/serine-rich, 46kD (1)	-0.26	-7.45e-10	0.36	0	-0.473	0.114	-0.143	-0.13	0	0.438	0.13
10934	MORF4 || mortality factor 4 (1)	-0.025	0.025	-0.085	0.845	0.58	0.837	-0.34	0.14	-8.79e-09	-0.308	0.58
10938	EHD1 || EH-domain containing 1 (1)	-7.6e-09	-0.02	0.18	0	-0.77	-0.913	0.26	-0.748	-1.49e-10	0.222	1.17
10939	AFG3L2 || AFG3 ATPase family gene 3-like 2 (yeast) (2)	-0.535	-0.415	0.415	0.645	0.07	0.147	-0.51	-0.735	-1.12e-08	-1.31	-0.495
10940	POP1 || processing of precursor 1, ribonuclease P/MRP subunit (S. cerevisiae) (1)	0.045	-0.245	-0.045	0.945	2e-08	0.287	0.91	0.707	-0.19	-0.138	-0.133
10943	MSL3L1 || male-specific lethal 3-like 1 (Drosophila) (3)	0.085	-0.425	0.115	-0.085	-0.035	-0.383	-0.38	0.405	7.45e-10	0.392	0.639
10944	SMAP || small acidic protein (3)	-0.145	0.145	-0.105	0.105	0.12	0.733	-0.684	1.06	-0.062	-0.0184	0.493
10945	KDELR1 || KDEL (Lys-Asp-Glu-Leu) endoplasmic reticulum protein retention receptor 1 (2)	0.03	-0.03	0.45	-0.17	-0.797	-0.00465	0.288	3.7e-08	-0.0717	-5.42e-08	-0.1
10946	SF3A3 || splicing factor 3a, subunit 3, 60kDa (2)	0.005	0.165	-0.415	-0.005	-0.005	-0.013	-0.975	0.03	0.11	-0.943	-0.395
10947	AP3M2 || adaptor-related protein complex 3, mu 2 subunit (1)	-0.045	-0.545	0.045	0.275	-0.4	-0.073	0.08	0.335	-0.78	-1.02	-0.065
10948	STARD3 || START domain containing 3 (1)	-0.02	0.37	0.02	-0.9	-0.52	-0.423	1.32	-0.122	-0.19	1.02	-0.443
10951	CBX1 || chromobox homolog 1 (HP1 beta homolog Drosophila ) (4)	0.08	-0.08	-0.09	1.54	0.16	0.017	-1.4	-0.18	0.833	-1.43	1.86
10952	SEC61B || Sec61 beta subunit (2)	0.24	0.42	-0.24	-0.65	-2.77e-08	0.027	-0.525	0.29	-0.74	-0.0184	-0.29
10953	TOMM34 || translocase of outer mitochondrial membrane 34 (1)	-0.18	0.09	0.15	-0.09	0.16	0.147	-0.54	-0.108	2.36	1.48	3.28
10954	PDIA5 || protein disulfide isomerase-associated 5 (2)	-0.01	0.01	-0.25	0.32	-0.015	0.492	-4.05e-08	-0.34	1.73	0.387	1.58
10955	TDE1 || tumor differentially expressed 1 (4)	-0.18	-0.07	0.16	0.07	-0.455	-0.198	3.1e-08	0.143	1.44	1.16	2
10956	OS9 || amplified in osteosarcoma (1)	0.19	2.69e-08	-0.5	0	-0.137	3.58e-09	0.093	-4.17e-09	0.323	-0.175	-0.6
10959	RNP24 || coated vesicle membrane protein (1)	0.005	0.035	-0.015	-0.005	-0.91	-0.603	-0.65	1.19e-09	0.44	0.552	0.88
10960	LMAN2 || lectin, mannose-binding 2 (1)	-0.105	0.315	0.105	-0.475	-2.98e-09	0.337	0.08	0.827	-0.69	0.562	-0.003
10962	MLLT11 || myeloid/lymphoid or mixed-lineage leukemia (trithorax homolog, Drosophila); translocated to, 11 (1)	0.215	-0.075	0.075	-0.185	4.47e-09	0.367	-0.29	0.645	-0.3	0.162	0.005
10965	ZAP128 || peroxisomal long-chain acyl-coA thioesterase (2)	-0.0725	0.172	0.0725	-0.258	-0.167	2.03e-08	0.313	0.145	-0.342	0.545	-0.145
10966	RAB40B || RAB40B, member RAS oncogene family (1)	-0.025	0.025	0.025	-0.345	0.063	5.96e-09	-0.447	0.157	0.513	-0.305	0.307
10970	CKAP4 || cytoskeleton-associated protein 4 (1)	-0.03	0.03	0.17	-0.25	-0.25	-0.143	0.1	0.035	0.31	-0.888	-0.835
10971	YWHAQ || tyrosine 3-monooxygenase/tryptophan 5-monooxygenase activation protein, theta polypeptide (2)	0.0075	-0.0875	-0.0075	0.412	-0.435	-0.278	-1.16	0.415	-0.325	0.247	0.44
10973	ASCC3 || activating signal cointegrator 1 complex subunit 3 (1)	-0.025	0.025	-0.425	0.215	0.69	0.257	-0.57	-0.005	2.24	0.522	1.8
10975	UQCR || ubiquinol-cytochrome c reductase, 6.4kDa subunit (2)	0.273	0.223	-0.223	-0.273	-0.4	0.242	0.145	0.347	-0.085	0.0267	0.158
10978	HEAB || ATP/GTP-binding protein (1)	0.005	-0.125	0.115	-0.005	-0.16	-0.023	0.05	-0.725	-0.23	0.0316	-0.095
10979	PLEKHC1 || pleckstrin homology domain containing, family C (with FERM domain) member 1 (1)	-0.335	0.165	-0.045	0.045	-0.0885	-0.0415	-1.29	0.38	0.382	0.723	0.29
10982	MAPRE2 || microtubule-associated protein, RP/EB family, member 2 (1)	-0.22	0.13	0.15	-0.13	-0.157	1.19e-09	-1.01	0.175	-0.317	-0.615	-0.175
10987	COPS5 || COP9 constitutive photomorphogenic homolog subunit 5 (Arabidopsis) (2)	-0.352	-0.193	0.383	0.193	-0.135	0.037	-0.305	-0.195	-1.36e-08	0.0466	0.365
10988	METAP2 || methionyl aminopeptidase 2 (2)	-3.86e-08	-3.75e-08	-0.06	0.43	0.395	0.627	-0.82	0.748	-1.12e-08	-0.688	0.282
10994	ILVBL || ilvB (bacterial acetolactate synthase)-like (13)	-0.078	0.078	0.618	-0.09	-0.455	0.138	1.65	0.176	-0.97	0.867	-0.925
11004	KIF2C || kinesin family member 2C (2)	0.31	0.6	-0.56	-0.31	-0.14	1	0.13	0.095	-0.94	-0.468	-0.435
11011	TLK2 || tousled-like kinase 2 (2)	-0.12	-0.34	0.12	0.54	0.015	0.252	0.135	-0.361	-0.265	-0.0233	-0.0411
11014	KDELR2 || KDEL (Lys-Asp-Glu-Leu) endoplasmic reticulum protein retention receptor 2 (1)	-0.195	-0.175	0.465	0.175	-0.15	0.147	-0.18	-0.025	4.84e-08	0.482	0.295
11015	KDELR3 || KDEL (Lys-Asp-Glu-Leu) endoplasmic reticulum protein retention receptor 3 (3)	-0.0955	0.0315	0.511	-0.0315	-0.167	-0.076	-2.62e-08	-0.205	0.98	0.642	0.875
11017	RY1 || putative nucleic acid binding protein RY-1 (2)	-0.0925	0.122	0.0925	-0.228	0.44	0.752	-0.525	0.9	-1.49e-10	-0.258	-0.22
11018	TMED1 || transmembrane emp24 domain containing 1 (1)	-0.25	0.12	-3.28e-09	0	-0.177	1.19e-09	1.75	-1.48	1.67	3.38	1.53
11019	LIAS || lipoic acid synthetase (2)	-0.152	0.198	0.152	-0.172	0.67	0.632	-0.405	0.497	0	-1.1	-0.0375
11020	RABL4 || RAB, member of RAS oncogene family-like 4 (2)	0.465	0.495	-0.465	-0.905	-0.435	-0.233	0.64	0.0895	-0.42	0.0916	-0.0755
11021	RAB35 || RAB35, member RAS oncogene family (2)	0.46	1.35	-0.47	-0.46	8.94e-10	-0.978	0.105	-0.23	-0.255	0.402	0.03
11022	TDRKH || tudor and KH domain containing (1)	0.035	-0.255	-0.035	0.465	0.01	1.01	-0.12	0.275	-0.54	-0.798	-0.275
11031	RAB31 || RAB31, member RAS oncogene family (3)	-0.506	-0.257	0.257	1.19	-0.845	-0.11	-0.493	-0.602	1.7	0.667	1.7
11034	DSTN || destrin (actin depolymerizing factor) (1)	-0.42	-0.2	0.2	0.23	0.47	0.977	-1.1	1.01	-0.21	-0.188	0.21
11039	SMA4 || SMA4 (1)	-0.025	0.025	0.085	-0.305	5.66e-09	0.827	0.61	0.642	0.14	-0.188	0.022
1104	RCC1 || regulator of chromosome condensation 1 (2)	0.17	0.31	-0.17	-0.55	0.08	-0.003	0.55	-0.843	0.81	-0.328	-0.193
11040	PIM2 || pim-2 oncogene (1)	0.045	-0.045	0.245	-0.445	-0.38	-0.593	0.27	-0.428	1.44	0.912	0.592
11041	B3GNT6 || UDP-GlcNAc:betaGal beta-1,3-N-acetylglucosaminyltransferase 6 (1)	0.12	0.43	-0.12	-1.06	0.0184	-0.345	-1.04	1	0.158	2.98e-09	0.315
11042	SMA5 || SMA5 (1)	0.015	0.155	-0.015	-0.125	0.37	0.227	0.64	0.174	-0.16	-0.368	-0.666
11049	YDD19 || YDD19 protein (1)	-0.59	-0.71	0.59	0.91	-0.275	0.832	-0.015	-0.078	0	0.507	0.832
1105	CHD1 || chromodomain helicase DNA binding protein 1 (2)	0.198	-0.198	-0.242	0.438	0.27	-0.008	8.94e-10	-2.09e-09	0.015	-0.208	0.075
11051	CPSF5 || cleavage and polyadenylation specific factor 5, 25 kDa (1)	-0.035	-0.355	0.465	0.035	-0.142	0.0353	-0.232	-0.32	-0.312	2.92e-08	0.38
11057	ABHD2 || abhydrolase domain containing 2 (2)	-0.17	-0.1	0.26	0.1	-0.457	-0.775	-0.547	-0.698	-0.857	-2.56e-08	-0.038
11059	WWP1 || WW domain containing E3 ubiquitin protein ligase 1 (3)	-0.301	-0.288	0.288	0.876	0.257	0.127	-0.116	0.402	0.314	-0.631	0.285
1106	CHD2 || chromodomain helicase DNA binding protein 2 (2)	-0.378	0.378	-0.627	0.777	0.29	0.762	-0.543	0.121	-6.71e-10	0.642	0.801
11064	CEP1 || centrosomal protein 1 (1)	0.3	-2.32e-08	-0.54	0	0.384	0.521	0.0442	0.125	-0.726	-0.00417	-0.035
11065	UBE2C || ubiquitin-conjugating enzyme E2C (2)	-0.245	-0.2	0.2	0.29	-0.703	-0.356	-4.29e-10	0.462	0	2.08	0.129
11068	CYB561D2 || cytochrome b-561 domain containing 2 (2)	0.11	-0.07	-4.14e-08	0	-0.8	-0.373	0.5	-0.92	-0.835	0.852	0.08
11070	PL6 || placental protein 6 (1)	0.51	0.47	-0.47	-1.06	-0.57	-0.593	0.88	-1.43e-08	-0.38	0.342	-0.9
11073	TOPBP1 || topoisomerase (DNA) II binding protein 1 (1)	-0.1	-0.13	0.1	0.27	0.21	0.127	-0.68	0.855	-4.02e-09	-1.02	0.195
11078	HRIHFB2122 || Tara-like protein (10)	0.067	-0.067	0.308	-0.348	0.428	-0.344	1.27	-0.196	-0.799	-1.18e-08	-1.54
11079	RER1 || RER1 retention in endoplasmic reticulum 1 homolog (S. cerevisiae) (3)	0.339	-0.277	0.0885	-0.0885	-0.228	0.205	0.475	-0.0315	-0.531	-6.08e-09	0.0315
11080	DNAJB4 || DnaJ (Hsp40) homolog, subfamily B, member 4 (1)	-0.47	-0.79	0.47	0.56	0.148	0.505	-0.382	0.34	0	-1.13e-08	1.24
11083	DATF1 || death associated transcription factor 1 (2)	0.13	-0.1	0.07	-0.07	0.203	1.19e-09	1.11	0.428	-0.412	-0.71	0.15
11091	WDR5 || WD repeat domain 5 (1)	-0.18	-0.16	0.5	0.16	-0.02	-0.253	0.01	-0.698	1.98	0.922	1.46
11093	ADAMTS13 || a disintegrin-like and metalloprotease (reprolysin type) with thrombospondin type 1 motif, 13 (1)	0.12	2.69e-08	-1.4	0	0.531	-0.792	0.711	0.159	0	-0.0577	-0.436
11094	C9orf7 || chromosome 9 open reading frame 7 (2)	0.07	-0.02	0.02	-0.735	-1.58e-08	-0.458	1.01	-0.235	0.135	1.06	0.035
11096	ADAMTS5 || a disintegrin-like and metalloprotease (reprolysin type) with thrombospondin type 1 motif, 5 (aggrecanase-2) (1)	0.175	-0.355	-0.175	0.395	-0.14	-0.183	0.14	0.155	1.35	0.522	1.31
11097	NUPL2 || nucleoporin like 2 (3)	-0.364	-0.102	0.102	0.208	0.174	0.321	0.03	0.0415	-0.676	-0.0914	0.169
11098	PRSS23 || protease, serine, 23 (1)	-0.105	0.015	-0.015	0.525	-3.28e-09	0.352	-0.465	-0.515	-0.305	0.757	0.149
11101	ATE1 || arginyltransferase 1 (2)	-0.42	-0.32	0.32	0.455	0.775	0.792	0	0.265	-0.395	-1.24	0.475
11102	RPP14 || ribonuclease P 14kDa subunit (2)	0.0575	-0.0325	0.0325	-0.0425	0.165	0.407	1.31e-08	0.228	-0.3	0.237	0.748
11103	HRB2 || HIV-1 rev binding protein 2 (2)	-0.21	-0.02	0.42	0.02	-3.87e-09	0.292	-0.935	0.667	0.625	-0.458	1.62
11108	PRDM4 || PR domain containing 4 (2)	-0.362	-0.273	0.273	0.598	0.408	-3.22e-08	-0.902	-0.163	0.808	-0.24	0.937
11112	HIBADH || 3-hydroxyisobutyrate dehydrogenase (1)	-0.29	-0.1	0.1	0.43	0.45	0.757	2.38e-09	1.43	-0.61	-0.108	-0.27
11113	CIT || citron (rho-interacting, serine/threonine kinase 21) (1)	0.53	0.33	-0.42	-0.33	0.19	-0.513	0.535	0.792	0.49	-0.648	-0.318
11116	FGFR1OP || FGFR1 oncogene partner (1)	-0.04	5.44e-09	0.85	0	0.87	0.967	-0.56	0.872	-0.16	-0.538	0.452
11118	BTN3A2 || butyrophilin, subfamily 3, member A2 (2)	-0.16	0.06	0.1	-0.06	0.02	0.197	-0.43	-0.198	0	-0.768	0.198
1112	CHES1 || checkpoint suppressor 1 (2)	-0.075	0.035	-0.035	0.465	0.12	-0.068	-7.15e-09	0.662	0.835	-0.953	0.142
11120	BTN2A1 || butyrophilin, subfamily 2, member A1 (1)	0.135	-0.135	-0.525	0.225	0.54	0.527	-0.22	-0.177	0.39	-0.308	-0.562
11123	DSCR1L2 || Down syndrome critical region gene 1-like 2 (1)	-0.755	-0.455	0.545	0.455	0.323	-2.98e-09	-0.077	-0.825	0	-0.355	-0.025
11124	FAF1 || Fas (TNFRSF6) associated factor 1 (5)	-0.521	-0.013	0.367	0.013	-0.468	0.361	4.29e-09	-0.06	-0.162	0.115	-0.152
11128	POLR3A || polymerase (RNA) III (DNA directed) polypeptide A, 155kDa (2)	0.08	-0.09	-0.08	0.49	0.25	0.217	0.285	-0.083	-0.22	-0.788	-1.46
11130	ZWINT || ZW10 interactor (2)	-0.09	0.09	-0.62	0.2	-0.305	-0.113	9.54e-09	0.07	1.58	0.997	0.9
11133	KPTN || kaptin (actin binding protein) (1)	-0.3	4.25e-09	0.01	0	-0.622	-0.485	0.498	-0.173	-0.752	-1.49e-10	-1.5
11135	CDC42EP1 || CDC42 effector protein (Rho GTPase binding) 1 (1)	0.145	0.505	-0.145	-0.775	-0.375	-1.01	1.14	-0.44	0.025	0.217	-1.61e-08
11137	PWP1 || PWP1 homolog (S. cerevisiae) (1)	-0.06	-6.48e-09	0.09	0	0.33	0.517	3.58e-09	-0.075	-0.13	-0.518	0.075
11140	CDC37 || CDC37 cell division cycle 37 homolog (S. cerevisiae) (3)	0.19	0.4	-0.65	-0.19	-0.12	0.487	0.81	0.245	-0.47	-0.128	-0.245
11143	MYST2 || MYST histone acetyltransferase 2 (2)	0.02	-0.02	-0.405	0.255	-0.212	2.03e-08	-0.032	-0.0355	1.56	1.08	0.325
11145	HRASLS3 || HRAS-like suppressor 3 (1)	0.28	9.69e-10	-0.01	0	-0.107	6.56e-09	-0.007	-0.618	1.01	0.985	1.17
11146	GLMN || glomulin, FKBP associated protein (3)	-0.64	-0.36	0.4	0.36	0.417	0.424	-0.86	0.476	0.095	-0.238	0.56
11147	HHLA3 || HERV-H LTR-associating 3 (1)	-0.015	0.145	0.015	-0.285	-1.09	2.03e-08	-0.557	-0.245	0.573	0.375	0.245
11149	BVES || blood vessel epicardial substance (1)	0.04	-0.28	0.51	-0.04	0.07	-0.193	-0.25	0.133	1.74	0.592	0.973
11151	CORO1A || coronin, actin binding protein, 1A (1)	0.01	-0.01	0.01	-0.69	-0.422	-0.345	0.797	-0.305	-0.507	0.354	-1.27
11152	WDR45 || WD repeat domain 45 (2)	0.323	0.412	-0.323	-0.557	-0.097	-1.19e-09	0.678	-0.065	-0.352	0.355	-1.09
11156	PTP4A3 || protein tyrosine phosphatase type IVA, member 3 (2)	0.155	0.215	-0.155	-0.74	-0.07	-0.703	0.97	-0.27	-1.04e-09	0.877	-1.1
11158	RABL2B || RAB, member of RAS oncogene family-like 2B (3)	0.093	-0.007	0.007	-0.253	-0.233	-0.253	7.03e-09	-0.025	-0.533	-0.378	-0.788
11159	RABL2A || RAB, member of RAS oncogene family-like 2A (3)	-0.033	0.237	0.033	-0.187	-0.39	-0.353	9.54e-09	0.141	-0.13	-0.545	-0.727
11164	NUDT5 || nudix (nucleoside diphosphate linked moiety X)-type motif 5 (2)	0.0075	-0.0825	0.0425	-0.0075	-2.68e-09	0.092	-0.088	0.016	-0.645	-0.708	0.188
11167	FSTL1 || follistatin-like 1 (3)	-0.65	0.07	-0.07	0.545	-0.587	0.42	-0.247	-0.174	0.398	-8.94e-10	0.503
11168	PSIP1 || PC4 and SFRS1 interacting protein 1 (9)	-0.405	0.405	-0.925	0.685	-0.26	0.283	0.028	0.315	-0.35	0.487	0.395
11169	WDHD1 || WD repeat and HMG-box DNA binding protein 1 (1)	-0.02	0.02	-0.17	0.06	0.68	0.457	-0.11	0.552	0.37	-0.508	0.138
11171	STRAP || serine/threonine kinase receptor associated protein (2)	0.005	-0.005	0.275	-0.06	2e-08	0.802	-0.265	0.092	-0.165	-0.363	0.167
11176	BAZ2A || bromodomain adjacent to zinc finger domain, 2A (1)	0.02	0.26	-0.81	-0.02	0.42	-0.623	0.96	0.0825	3.73e-11	-0.628	-0.203
11177	BAZ1A || bromodomain adjacent to zinc finger domain, 1A (1)	-1.85	0.17	-0.17	0.74	0.51	0.552	-0.59	0.352	0.75	-2.44	0.733
11179	ZNF277 || zinc finger protein 277 (1)	-0.41	-0.41	0.61	0.41	0.213	-2.38e-09	-1.23	0.165	0.993	0.235	1.4
11180	WDR6 || WD repeat domain 6 (1)	0.225	0.345	-0.225	-0.465	-0.31	-0.743	0.24	-0.865	-0.66	-0.638	-0.505
11182	SLC2A6 || solute carrier family 2 (facilitated glucose transporter), member 6 (1)	0.105	0.065	-0.065	-0.925	-0.22	-1.16	0.82	-0.555	1.03e-08	0.432	-0.035
11183	MAP4K5 || mitogen-activated protein kinase kinase kinase kinase 5 (1)	0.12	-0.12	-1.73	0.5	0.874	0.431	-1.22	1.28	-0.266	-0.224	0.025
11186	RASSF1 || Ras association (RalGDS/AF-6) domain family 1 (2)	-0.468	-0.152	0.152	0.583	-0.502	0.285	-1.6e-10	-0.34	1.22	0.758	0.568
1119	CHKA || choline kinase alpha (2)	-0.23	-0.96	0.57	0.23	-0.015	0.107	0.215	0.242	-5.21e-09	-0.328	-0.463
11190	CEP2 || centrosomal protein 2 (1)	0.17	-0.17	0.41	-0.45	1.12	-0.083	1.92	0.092	-0.72	-0.0784	-0.868
11194	ABCB8 || ATP-binding cassette, sub-family B (MDR/TAP), member 8 (1)	3.29e-08	0.15	-0.48	0	-0.51	-0.063	1.62	-0.005	-0.23	1.5	-2.38
11196	SEC23IP || SEC23 interacting protein (3)	-0.357	-0.297	0.297	1.24	0.27	0.437	-0.966	0.465	1.24	-0.131	1.2
11198	SUPT16H || suppressor of Ty 16 homolog (S. cerevisiae) (1)	0.345	0.175	-0.175	-0.265	0.183	5.96e-09	-0.482	0.207	0.008	0.105	-1.07
112	ADCY6 || adenylate cyclase 6 (1)	-0.215	0.075	-0.075	0.435	0.145	1.55	1.44	0.432	0.565	-0.193	-0.432
1120	CHKB || choline kinase beta (10)	-0.036	0.036	0.428	-0.087	-0.043	1.67e-09	0.945	0.0165	-0.854	0.344	-0.601
11200	CHEK2 || CHK2 checkpoint homolog (S. pombe) (2)	-0.0825	-0.0875	0.142	0.0825	-0.315	0.112	-0.48	0.275	1.09	0.307	1.5
11215	AKAP11 || A kinase (PRKA) anchor protein 11 (2)	0.085	-0.695	-0.085	0.275	0.518	0.0254	-0.237	0.186	-0.402	1.79e-09	0.167
11216	AKAP10 || A kinase (PRKA) anchor protein 10 (1)	-0.44	-0.62	0.44	0.58	-2.3e-08	0.407	0.37	0.18	-0.04	-0.198	-0.02
11218	DDX20 || DEAD (Asp-Glu-Ala-Asp) box polypeptide 20 (1)	-0.315	-0.295	0.445	0.295	0.38	0.227	0	0.635	-0.29	-0.228	0.105
11219	TREX2 || three prime repair exonuclease 2 (2)	-0.055	0.35	0.055	-0.995	-0.76	-0.673	0.193	-0.657	0.15	0.0517	-0.0238
11222	MRPL3 || mitochondrial ribosomal protein L3 (3)	-0.365	-0.065	0.155	0.065	0.385	0.822	-0.112	-0.275	0.148	-1.83e-09	0.275
1123	CHN1 || chimerin (chimaerin) 1 (1)	-9.98e-09	-0.2	0.36	0	-0.172	0.115	-0.312	0.19	0.0583	-2.98e-09	0.664
11230	PRAF2 || PRA1 domain family, member 2 (1)	0.15	0.1	-0.1	-0.4	-0.447	-2.74e-08	-0.447	-0.24	-0.147	0.265	-0.1
11234	HPS5 || Hermansky-Pudlak syndrome 5 (1)	-0.275	-0.385	0.275	0.545	0.31	0.677	0.34	-0.743	-0.29	-0.418	0.227
11235	PDCD10 || programmed cell death 10 (3)	-0.302	-0.0825	0.0825	0.367	-2.3e-08	0.184	-0.717	-0.325	-0.13	-0.00835	1.24
112398	EGLN2 || egl nine homolog 2 (C. elegans) (2)	-0.02	0.36	0.02	-0.76	0.2	-0.323	0.795	-0.653	-0.425	-0.138	-1.63
11243	PMF1 || polyamine-modulated factor 1 (1)	0.31	0.14	-0.14	-0.47	-0.1	-0.463	0.73	-0.758	0.47	1.1	-0.258
11247	NXPH4 || neurexophilin 4 (1)	0.39	0.33	-0.33	-0.97	-0.55	-1.1	-0.01	-0.915	0.48	0.842	-0.665
112483	SAT2 || spermidine/spermine N1-acetyltransferase 2 (2)	0.015	0.2	-0.015	-0.98	0.165	0.362	0.55	0.289	-0.495	-0.178	-0.251
112495	C6orf51 || chromosome 6 open reading frame 51 (2)	0.09	0.3	-0.09	-0.22	0.485	0.562	-1.02	-0.055	-0.085	-1.47	0.055
11253	MAN1B1 || mannosidase, alpha, class 1B, member 1 (1)	1.94e-09	-0.01	0.12	0	-4.2e-08	-0.313	1.36	-1.02	-0.21	0.432	0.165
11257	TP53AP1 || TP53 activated protein 1 (1)	0.76	0.29	-0.29	-0.8	-0.68	-0.093	-1.79e-09	-0.258	0.92	1.38	0.572
11260	XPOT || exportin, tRNA (nuclear export receptor for tRNAs) (2)	-0.135	-0.085	0.085	0.925	0.275	-0.108	-1.33	0.07	1	0.277	0.19
112616	CKLFSF7 || chemokine-like factor super family 7 (2)	0.26	0.3	-0.26	-0.61	-0.635	-0.193	-0.22	-1.13	2	1.98	0.9
11266	DUSP12 || dual specificity phosphatase 12 (1)	-0.115	0.035	0.245	-0.035	-0.19	0.387	-0.08	0.425	0.53	0.902	1.65
11267	EAP30 || EAP30 subunit of ELL complex (1)	0.15	0.35	-0.15	-0.47	-6.26e-09	0.207	0.11	-0.01	-0.54	-0.958	0.01
11269	DDX19 || DEAD (Asp-Glu-Ala-As) box polypeptide 19 (2)	0.185	0.235	-0.485	-0.185	-1.34e-08	0.507	-0.6	0.04	-0.26	-0.598	0.645
11270	NRM || nurim (nuclear envelope membrane protein) (1)	0.15	-0.15	0.22	-0.35	-0.5	-0.393	0.29	-1.55e-08	-8.79e-09	0.202	-0.11
112703	LOC112703 || hypothetical protein BC004941 (2)	0.205	0.075	-0.075	-0.555	-0.045	-0.258	0.92	-0.3	-0.47	0.842	-0.475
11272	PRR4 || proline rich 4 (lacrimal) (1)	4.72e-08	-0.07	4.92e-08	0.18	3.28e-09	0.507	-0.17	0.665	0.13	-0.188	0.035
112724	RDH13 || retinol dehydrogenase 13 (all-trans and 9-cis) (1)	-0.01	0.12	0.01	-0.37	-0.0817	-0.405	1.45	-0.105	-0.962	-4.17e-09	-0.265
11273	ATXN2L || ataxin 2-like (3)	2.29	0.515	-0.775	-0.515	-0.667	-2.09e-09	-0.007	-0.256	1.13	0.41	-0.779
11274	USP18 || ubiquitin specific protease 18 (2)	-0.19	-0.69	0.19	0.41	-0.265	-0.323	-0.28	-0.402	0.825	0.482	0.842
112752	MGC16028 || MGC16028 similar to RIKEN cDNA 1700019E19 gene (1)	0.085	0.145	-0.085	-0.605	-0.59	0.187	-0.08	-0.34	-1.12	-0.608	0.34
11276	AP1GBP1 || AP1 gamma subunit binding protein 1 (1)	-0.11	-0.38	0.11	0.47	0.44	0.457	-0.27	-0.42	0.78	-0.218	-0.005
11278	KLF12 || Kruppel-like factor 12 (1)	0.065	0.015	-0.635	-0.015	0.0075	-0.0255	-0.0075	0.394	0	-0.216	-0.212
11282	MGAT4B || mannosyl (alpha-1,3-)-glycoprotein beta-1,4-N-acetylglucosaminyltransferase, isoenzyme B (3)	-0.0985	0.248	0.0985	-0.692	-0.703	0.0237	0.777	0.044	-1.17e-09	0.851	-0.597
11284	PNKP || polynucleotide kinase 3'-phosphatase (2)	-0.15	0.15	0.19	-0.38	0.0534	-0.415	1.49	-0.37	-0.947	-5.36e-09	-1.14
112849	C14orf149 || chromosome 14 open reading frame 149 (1)	-0.005	-0.295	0.215	0.005	-0.147	7.15e-09	0.483	0.31	0.413	0.855	1.08
11285	B4GALT7 || xylosylprotein beta 1,4-galactosyltransferase, polypeptide 7 (galactosyltransferase I) (1)	-0.065	0.605	0.065	-0.555	-0.117	2.38e-09	1.53	0.185	-0.237	0.545	-0.935
112869	LOC112869 || hypothetical protein BC011981 (1)	0.59	0.26	-0.26	-0.58	-0.48	0.257	0.25	-0.43	-0.37	0.132	0.09
112936	MGC10485 || hypothetical protein MGC10485 (2)	0.0525	-0.0525	0.247	-0.762	1.79e-09	-0.548	0.315	-0.487	-0.295	-0.568	-0.0075
112939	BTBD14B || BTB (POZ) domain containing 14B (2)	-2.43e-08	-0.11	0.12	0	-1.82e-08	-0.828	-0.34	-0.518	0.13	0.182	-0.003
112942	MGC15407 || similar to RIKEN cDNA 4931428D14 gene (2)	0.315	0.965	-0.465	-0.315	0.75	0.952	-0.86	0.795	-3.26e-08	-1.85	0.41
112950	MED8 || mediator of RNA polymerase II transcription, subunit 8 homolog (yeast) (2)	-0.125	-0.2	0.47	0.125	0.025	0.362	-0.69	-0.08	-7.6e-09	-0.673	-0.11
1130	LYST || lysosomal trafficking regulator (1)	0.27	0.26	-0.5	-0.26	0.869	0.266	0.569	0.245	0	0.0708	0.685
113000	RPUSD1 || RNA pseudouridylate synthase domain containing 1 (1)	0.23	0.52	-0.23	-0.91	-0.47	-0.313	1.2	0.1	-0.09	0.622	-1.8
11311	VPS45A || vacuolar protein sorting 45A (yeast) (1)	-0.145	-0.065	0.065	0.305	1.28e-08	0.897	0.44	0.732	-0.49	-0.0184	-0.418
113115	FAM54A || family with sequence similarity 54, member A (1)	0.025	-0.025	0.225	-0.135	0.173	-1.79e-08	0.233	-0.06	-0.207	-0.0154	0.89
11313	LYPLA2 || lysophospholipase II (2)	0.18	0.08	-0.08	-0.345	-0.157	-0.4	0.728	-0.21	-0.277	-1.85e-08	-0.89
113130	CDCA5 || cell division cycle associated 5 (1)	0.09	0.45	-0.17	-0.09	-0.18	0.017	-7.15e-09	0.34	-0.55	-0.208	-0.34
113174	LOC113174 || hypothetical protein BC012010 (1)	-0.27	-0.03	0.03	0.37	0.52	0.507	-0.96	0.53	-0.02	-0.0784	0.53
113178	SCAMP4 || secretory carrier membrane protein 4 (1)	-0.05	0.27	0.05	-0.65	-0.44	-0.673	0.98	-0.418	1.04	1.1	0.732
113189	D4ST1 || dermatan 4 sulfotransferase 1 (1)	5.68e-08	0.21	-0.21	0	-1	-0.823	-1.91e-08	-0.548	2.3	2.5	1.75
11319	HSGT1 || suppressor of S. cerevisiae gcr2 (1)	-0.425	-0.065	0.415	0.065	0.13	0.607	-0.11	0.305	0.25	-0.208	0.175
11321	XAB1 || XPA binding protein 1 (1)	-0.115	-0.475	0.115	0.295	-0.17	0.327	-0.42	0.275	0.14	0.0517	0.955
113235	MGC9564 || similar to RIKEN cDNA 1110002C08 gene (3)	-0.0425	0.133	0.0425	-0.552	-0.763	-0.866	-7.58e-09	-0.423	0.177	1.06	0.26
113246	GRCC10 || likely ortholog of mouse gene rich cluster, C10 gene (1)	0.5	0.36	-0.36	-0.7	-0.547	0	0.263	0.297	-0.597	-0.0254	0.027
11328	FKBP9 || FK506 binding protein 9, 63 kDa (2)	-0.177	0.107	-0.107	0.352	0.163	5.96e-09	-0.072	-0.172	0.218	-1.08	-0.227
11332	BACH || brain acyl-CoA hydrolase (3)	-0.153	0.57	0.153	-0.773	-0.937	-0.4	0.368	-0.547	-0.397	0.228	-0.143
11333	PDAP1 || PDGFA associated protein 1 (2)	0.16	0.72	-0.89	-0.16	0.155	-0.358	0.305	0.14	-0.245	-0.863	-1.35
11334	TUSC2 || tumor suppressor candidate 2 (2)	0.113	0.193	-0.113	-0.682	0.608	-0.0496	0.303	-0.17	-0.412	-1.01e-08	0.17
11335	CBX3 || chromobox homolog 3 (HP1 gamma homolog, Drosophila) (3)	-0.455	0.015	-0.015	0.205	1.01e-09	0.09	-0.127	-0.101	0.103	-0.652	-0.0405
113402	C6orf83 || chromosome 6 open reading frame 83 (1)	0.115	0.305	-0.115	-0.475	-0.025	0.292	-0.405	0.54	-0.815	-0.123	0.51
11342	RNF13 || ring finger protein 13 (2)	-0.273	-0.417	0.273	0.463	0.093	-1.07e-08	-0.487	0.295	0.863	0.29	1.54
113451	ODC-p || ornithine decarboxylase-like (1)	-0.085	0.085	0.485	-0.135	-0.000825	0.0162	0.939	-0.033	-0.721	0.000825	-0.227
113452	BCLP || beta-casein-like protein (2)	0.24	-0.07	0.07	-0.525	-0.6	-0.123	0.54	0.015	-0.79	0.262	-1.35
113655	LOC113655 || hypothetical protein BC011982 (2)	0.36	0.25	-0.25	-0.855	-0.492	4.77e-09	1.2	-0.628	1.49	2.38	0.602
113675	SDSL || serine dehydratase-like (1)	1.39e-08	0.19	-0.05	0	-0.03	-0.153	1.36	-0.36	-0.52	1.68	0.12
113763	C7orf29 || chromosome 7 open reading frame 29 (1)	-5.29e-08	-5.18e-08	0.17	-0.21	0.25	-0.423	0.35	0.245	-1.09	-0.548	-0.035
113791	MGC17330 || HGFL gene (1)	-0.09	-0.08	0.18	0.08	0.483	-1.12e-10	0.303	-0.325	0.503	-0.115	0.755
113829	SLC35A4 || solute carrier family 35, member A4 (1)	0.035	0.215	-0.035	-0.165	-0.33	-0.143	2.86e-08	0.172	2.16	2.08	2.46
113878	DTX2 || deltex homolog 2 (Drosophila) (2)	-0.06	0.06	0.16	-0.47	3.28e-09	-0.573	0.79	-0.19	1.2	1.25	0.407
1139	CHRNA7 || cholinergic receptor, nicotinic, alpha polypeptide 7 (2)	-0.315	-0.245	0.245	0.385	-0.16	-0.138	0.09	-0.202	-0.85	-0.118	-0.575
1140	CHRNB1 || cholinergic receptor, nicotinic, beta polypeptide 1 (muscle) (1)	0.075	0.085	-0.075	-0.425	-8.64e-09	0.347	-0.19	-0.995	0.11	-0.698	-0.095
114034	TOE1 || target of EGR1, member 1 (nuclear) (1)	-0.28	-0.02	0.02	0.16	-0.0267	1.24	-0.317	-0.065	0.183	-1.37e-08	0.065
114043	C21orf90 || chromosome 21 open reading frame 90 (2)	0.335	0.095	-0.095	-0.25	-1.24	-0.611	-0.228	-0.165	0.823	1.06	0.165
114049	WBSCR22 || Williams Beuren syndrome chromosome region 22 (6)	-0.13	0.13	0.4	-0.33	-8.64e-09	0.269	-0.123	-0.0585	-0.87	-1.23	0.0585
1141	CHRNB2 || cholinergic receptor, nicotinic, beta polypeptide 2 (neuronal) (1)	0.145	0.055	-0.115	-0.055	0.06	0.357	-0.06	-0.243	0.33	0.112	-0.233
114112	TXNRD3 || thioredoxin reductase 3 (1)	-0.13	-0.14	0.13	0.43	-0.05	-0.473	-4.77e-09	-0.948	-6.41e-09	-0.0984	-0.648
114135	LOC114135 || putative acid phosphatase (1)	0.28	0.13	-0.67	-0.13	0.18	0.137	-1.08	0.402	-1.07	-1.85	-1.06
114327	EFHC1 || EF-hand domain (C-terminal) containing 1 (1)	-0.02	-0.2	0.29	0.02	0.08	0.187	0.17	0.482	-0.29	0.322	0.323
114609	TIRAP || toll-interleukin 1 receptor (TIR) domain containing adaptor protein (4)	0.609	-0.169	-0.592	0.169	-0.035	-0.77	2.62e-08	0.139	-0.315	0.387	-0.677
114659	LRRC37B || leucine rich repeat containing 37B (2)	-0.61	-0.225	0.77	0.225	0.907	0.789	-0.858	0.87	0	-0.0759	0.03
1147	CHUK || conserved helix-loop-helix ubiquitous kinase (3)	-0.01	0.01	-0.57	1.2	0.1	1.03	-0.337	0.306	1.49e-09	0.582	0.493
114783	LMTK3 || lemur tyrosine kinase 3 (1)	0.14	-0.06	0.06	-0.69	0.47	-0.263	0.33	0.292	0.07	-0.608	-0.808
114787	KIAA1893 || G protein-regulated inducer of neurite outgrowth 1 (1)	0.66	0.36	-0.36	-0.9	0.22	-0.453	0.56	-0.31	0	-0.418	-1.77
114790	STK11IP || serine/threonine kinase 11 interacting protein (1)	0.425	0.325	-0.325	-0.735	-2.09e-09	-0.413	0.98	-0.585	0.08	0.282	-0.225
114793	FMNL2 || formin-like 2 (1)	0.085	-0.105	-0.015	0.015	-6.26e-09	-0.113	0.22	-0.34	0.63	-0.168	0.95
114799	ESCO1 || establishment of cohesion 1 homolog 1 (S. cerevisiae) (2)	0.065	-0.065	-0.16	0.28	0.253	0.15	-0.229	0.305	0.308	4.17e-09	0.925
114804	RNF157 || ring finger protein 157 (1)	-9.98e-09	-0.48	0.23	0	-0.24	-0.133	0.65	0.158	-0.26	0.152	-0.598
114822	RHPN1 || rhophilin, Rho GTPase binding protein 1 (1)	0.04	0.2	-0.04	-0.88	-0.44	-0.768	0.95	-0.142	1.19	0.567	-1.72
114826	SMYD4 || SET and MYND domain containing 4 (1)	0.15	-1.36e-08	-0.12	0	-0.17	-0.103	0.34	0.577	0.25	-0.128	-0.368
114879	OSBPL5 || oxysterol binding protein-like 5 (1)	0.18	-0.01	0.01	-1.17	0.827	-0.336	0.987	-0.148	-0.003	-0.0513	-0.908
114880	OSBPL6 || oxysterol binding protein-like 6 (1)	2.34e-08	-0.24	0.24	0	-6.26e-09	0.037	-0.49	0.213	0.59	-0.678	0.449
114883	OSBPL9 || oxysterol binding protein-like 9 (2)	-0.165	-0.215	0.165	0.7	0.165	0.397	-0.355	1.22	-0.315	-0.113	-0.04
114884	OSBPL10 || oxysterol binding protein-like 10 (2)	-0.133	-0.217	0.133	0.417	-0.19	-0.703	-0.025	-0.388	0	0.482	1.22
114885	OSBPL11 || oxysterol binding protein-like 11 (1)	0.025	-0.185	-0.025	0.655	-8.64e-09	-0.093	-0.64	0.345	1.3	0.332	1.42
114907	FBXO32 || F-box protein 32 (3)	0.005	0.29	-0.005	-0.285	-1.1e-08	0.43	-0.11	-0.003	0.82	0.247	0.827
114915	TIGA1 || TIGA1 (1)	0.045	-0.015	-0.215	0.015	-0.145	1.05	0.92	0.332	-0.13	0.712	0.942
114926	LOC114926 || hypothetical protein BC013035 (1)	0.05	0.12	-0.05	-0.3	-0.17	0.067	0.12	0.37	0.14	0.272	0.86
114971	PTPMT1 || protein tyrosine phosphatase, mitochondrial 1 (3)	0.215	0.148	-0.148	-0.415	0.006	-1e-08	-0.057	0.025	-0.511	-0.762	-0.548
114984	LOC114984 || hypothetical protein BC014089 (1)	0.32	0.57	-0.32	-1.25	-0.037	1.07e-08	1.43	-0.19	-0.677	0.325	-1.19
114991	ZNF618 || zinc finger protein 618 (1)	0.335	0.015	-0.165	-0.015	0.16	0.147	0.29	0.347	-0.33	-1.21	-0.283
115024	MGC20781 || hypothetical protein MGC20781 (3)	-0.286	0.0325	0.591	-0.0325	-1.06	-1.74e-08	0.32	0.0525	-0.685	0.185	-0.709
115106	CCDC5 || coiled-coil domain containing 5 (spindle associated) (2)	-0.357	-0.163	0.163	0.163	0.603	0.529	-0.752	-0.195	-0.0475	-0.616	0.385
115123	MARCH3 || membrane-associated ring finger (C3HC4) 3 (1)	-0.405	-0.395	0.465	0.395	-0.392	-0.145	-0.142	-0.343	-0.122	-3.99e-08	0.467
115201	APG4A || APG4 autophagy 4 homolog A (S. cerevisiae) (2)	-0.755	-0.15	0.15	0.605	-0.12	0.507	-0.947	-0.789	2.03	0.692	2.3
115207	KCTD12 || potassium channel tetramerisation domain containing 12 (2)	-0.05	0.05	-2.69	0.51	-0.22	-0.373	-0.63	0.5	0.03	0.192	0.96
115290	FBXO17 || F-box protein 17 (2)	-0.0325	0.0225	-0.0225	0.0875	-0.385	-0.628	0.635	-0.315	-0.105	0.477	-0.265
1153	CIRBP || cold inducible RNA binding protein (3)	-0.01	0.48	-0.15	0.01	0.293	-8.34e-09	0.443	0.215	-0.317	-0.675	-0.45
115353	LRRC42 || leucine rich repeat containing 42 (1)	-0.075	0.025	0.415	-0.025	-0.09	-0.073	-0.55	0.16	1.74	1.22	2.91
115426	UHRF2 || ubiquitin-like, containing PHD and RING finger domains, 2 (2)	-0.35	-0.175	0.175	0.26	0.0433	0.235	0.118	0.145	-0.557	2.68e-08	0.085
1155	CKAP1 || cytoskeleton associated protein 1 (1)	0.145	0.425	-0.145	-0.975	-1.2	-0.462	0.471	-1.3	0.462	1.11	1.3
115509	ZNF689 || zinc finger protein 689 (1)	-0.33	-0.33	0.33	0.83	-0.22	-0.363	0.17	-0.953	0.71	0.382	0.677
115548	FCHO2 || FCH domain only 2 (1)	0.11	-0.11	-0.36	0.26	0.57	-0.013	-0.22	0.185	2.74	1.74	2.88
115703	SNX26 || sorting nexin 26 (1)	-0.095	0.095	0.345	-0.635	0.468	-1.19	0.758	-0.07	0	-5.96e-10	-0.95
115704	EVI5L || ecotropic viral integration site 5-like (1)	0.09	0.04	-0.04	-1.53	0.71	-0.093	1.41	0.245	0	-0.318	-0.555
115827	RAB3C || RAB3C, member RAS oncogene family (1)	-3.13e-09	0.26	-0.41	0	1.19e-09	0.377	-0.76	0.47	0.58	0.492	1.62
1159	CKMT1B || creatine kinase, mitochondrial 1B (2)	0.117	0.0725	-0.0725	-0.302	-0.09	0.187	2.09e-09	0.325	0.405	-0.433	-0.065
116028	MGC24665 || hypothetical protein MGC24665 (1)	-0.17	0.01	0.14	-0.01	-0.16	0.127	0.33	-0.22	-0.34	-0.508	5.96e-10
116039	OSR2 || odd-skipped related 2 (Drosophila) (1)	-0.095	-0.075	0.235	0.075	-0.0385	0.0385	-0.518	-0.19	-0.0485	-0.107	-0.85
116068	LOC116068 || hypothetical protein LOC116068 (2)	-0.145	-0.005	0.005	0.485	-0.045	0.162	-0.2	0.665	0.045	0.647	0.71
1161	ERCC8 || excision repair cross-complementing rodent repair deficiency, complementation group 8 (2)	-0.14	-0.435	0.14	0.33	0.023	0.617	-0.14	0.291	-0.457	0.54	0.311
116115	ZNF526 || zinc finger protein 526 (3)	1.97	0.618	-0.618	-0.969	-0.102	-0.596	0.525	-0.322	-0.0134	-7.63e-10	-0.379
116150	C6orf68 || chromosome 6 open reading frame 68 (2)	-0.22	-0.36	0.285	0.22	0.338	-0.155	-1.22	0.323	0.913	7.75e-09	1.17
116151	C20orf108 || chromosome 20 open reading frame 108 (1)	-0.74	-0.36	0.64	0.36	-1.82e-08	0.332	-0.39	0.037	-0.55	-1.12	-0.883
116225	ZMYND19 || zinc finger, MYND domain containing 19 (2)	0.58	0.83	-0.58	-0.61	0.13	0.187	0.42	-0.142	1.98e-08	-0.548	-0.443
116238	LOC116238 || hypothetical protein BC014072 (1)	0.2	0.12	-0.12	-0.34	-0.789	-0.0823	0.231	0.265	-0.849	0.0823	-0.265
1163	CKS1B || CDC28 protein kinase regulatory subunit 1B (2)	0.175	0.035	-0.035	-0.355	-0.237	-5.13e-08	0.223	-0.613	1.13	1.48	1.61
116412	LOC116412 || hypothetical protein BC012365 (1)	-0.11	0.38	0.11	-0.81	-0.11	-1.47	1.09	-0.338	0	0.502	-0.0675
116447	TOP1MT || topoisomerase (DNA) I, mitochondrial (1)	0.755	0.405	-1.56	-0.405	0.3	0.077	0.32	-0.195	-0.37	-1.14	-0.515
116540	MRPL53 || mitochondrial ribosomal protein L53 (1)	0.305	0.165	-0.165	-0.705	-0.15	-0.023	0.23	-0.35	-0.7	-0.228	-0.53
116832	RPL39L || ribosomal protein L39-like (1)	0.495	0.565	-0.495	-0.805	-0.5	-0.223	-0.09	-0.738	0.32	1.5	0.662
116840	LIP8 || LYST-interacting protein LIP8 (1)	0.185	0.015	-0.015	-0.275	-4.47e-10	-0.373	0.71	0.472	-0.3	-0.258	-1.65
116841	IMAGE3451454 || SVAP1 protein (2)	0.0875	0.163	-0.0875	-0.588	-0.652	-2.98e-09	0.008	1.79e-08	-0.552	-0.28	-0.64
116843	C6orf192 || chromosome 6 open reading frame 192 (1)	0.055	-0.025	0.025	-0.665	-0.24	0.007	-0.54	0.615	1.54	1.49	1.45
116936	RNU86 || RNA, U86 small nucleolar (1)	-0.04	0.41	0.04	-0.47	-0.44	0.507	0.2	-0.475	-0.13	0.452	0.375
116969	ART5 || ADP-ribosyltransferase 5 (1)	0.545	0.535	-0.535	-0.925	-1.82e-08	-0.473	0.25	0.095	0.04	-0.0883	-0.095
116985	CENTD2 || centaurin, delta 2 (2)	0.015	0.155	-0.015	-0.705	0.06	-0.293	0.76	-0.42	-0.145	-0.303	-0.737
117143	STAF42 || SPT3-associated factor 42 (1)	-0.105	-0.305	0.205	0.105	0.04	0.517	-0.04	0.66	-0.4	-0.488	0.1
117145	CTMP || C-terminal modulator protein (1)	0.02	0.04	-0.02	-0.11	0.145	-0.023	-0.58	-0.04	1.31	0.252	1.73
1173	AP2M1 || adaptor-related protein complex 2, mu 1 subunit (1)	0.03	0.1	-0.14	-0.03	-0.6	-0.213	0.05	-2.03e-08	0.36	0.292	-0.69
1174	AP1S1 || adaptor-related protein complex 1, sigma 1 subunit (3)	0.44	0.57	-0.44	-1.4	-0.222	5.96e-10	0.638	0.167	-0.972	0.0946	-0.733
1175	AP2S1 || adaptor-related protein complex 2, sigma 1 subunit (3)	0.195	0.145	-0.145	-0.525	-0.962	2.03e-08	-0.232	-0.315	0.118	0.75	0.015
117581	TWIST2 || twist homolog 2 (Drosophila) (1)	0.425	0.015	-0.015	-0.585	-0.14	-0.503	0.39	-0.993	2.69	2.55	2.24
1176	AP3S1 || adaptor-related protein complex 3, sigma 1 subunit (1)	1.15e-08	-0.13	0.3	0	-0.437	-6.56e-09	-1.26	-0.005	-0.347	0.0347	0.005
118	ADD1 || adducin 1 (alpha) (3)	-0.125	0.125	-1.5	0.595	0.025	0.082	0.363	-0.021	-0.345	-0.253	0.021
1181	CLCN2 || chloride channel 2 (1)	0.225	0.115	-0.115	-0.315	0.05	-0.023	0.31	-0.08	-0.14	-0.448	-0.79
1182	CLCN3 || chloride channel 3 (3)	-0.055	-0.225	0.055	0.175	-0.087	0.224	0.1	0.186	-2.23e-09	-0.278	0.034
118424	UBE2J2 || ubiquitin-conjugating enzyme E2, J2 (UBC6 homolog, yeast) (3)	-0.0375	0.0375	0.343	-0.425	0.128	-4.77e-09	0.188	-0.394	-0.202	0.53	0.725
118432	RPL29P2 || ribosomal protein L29 pseudogene 2 (1)	0.7	0.26	-0.26	-0.42	2.47e-08	0.427	-0.04	0.947	-0.64	-1.05	-0.223
118472	ZNF511 || zinc finger protein 511 (2)	-0.055	0.065	0.055	-0.785	-0.177	2.38e-09	1.2	0.01	-0.212	0.83	-0.06
118487	CHCHD1 || coiled-coil-helix-coiled-coil-helix domain containing 1 (2)	0.565	0.365	-0.385	-0.365	-0.102	2.98e-09	-0.407	-0.133	0.528	0.235	0.743
118491	TTC18 || tetratricopeptide repeat domain 18 (2)	0.22	1.97e-08	-0.42	0	0.451	0.0377	0.391	0.035	-2.09	-0.0377	0.165
1185	CLCN6 || chloride channel 6 (13)	0.36	-0.06	0.06	-0.4	-0.335	0.137	0.37	-0.0195	-0.225	0.412	-0.288
1186	CLCN7 || chloride channel 7 (2)	-0.04	0.04	0.275	-1.51	-0.065	-0.368	1.75	-0.158	-0.09	0.637	-1.42
118738	ZNF488 || zinc finger protein 488 (1)	-0.02	0.21	-6.86e-09	0	-0.437	5.36e-09	-0.127	-0.07	0.163	-0.425	-1.66
118812	C10orf83 || chromosome 10 open reading frame 83 (1)	0.455	0.185	-0.185	-0.235	0.0265	-0.0265	-0.153	0.0495	2.41	0.238	0.299
118813	ZFYVE27 || zinc finger, FYVE domain containing 27 (1)	0.265	0.275	-0.265	-0.835	0.0984	-0.465	0.798	0.225	-0.572	5.54e-08	-0.125
118945	na || similar to Cathepsin L, preproprotein (1)	0.19	2.93e-08	-1.23	0	0.548	0.245	-0.242	-0.218	0.308	-4.95e-08	0.612
118980	SFXN2 || sideroflexin 2 (3)	-0.142	-0.0275	0.968	0.0275	-6.86e-09	-0.028	0.402	0.108	0.975	0.947	0.63
118987	PDZK8 || PDZ domain containing 8 (1)	-0.835	-0.445	0.515	0.445	0.9	0.687	-0.46	-0.193	0.64	-0.328	0.277
119	ADD2 || adducin 2 (beta) (1)	0.235	-0.235	-0.305	0.265	-0.3	-0.603	-2.38e-09	-0.905	1.01	-0.0984	-0.02
119016	CTGLF1 || centaurin, gamma-like family, member 1 (2)	0.065	0.555	-0.065	-0.445	0.813	-4.17e-08	-0.297	1.1	-0.827	0.0347	-0.175
119032	C10orf32 || chromosome 10 open reading frame 32 (2)	-0.0025	0.0025	0.273	-0.107	0.15	-0.033	-1.07	0.383	-0.475	-0.768	-0.113
1191	CLU || clusterin (complement lysis inhibitor, SP-40,40, sulfated glycoprotein 2, testosterone-repressed prostate message 2, apolipoprotein J) (2)	0.268	0.233	-0.752	-0.233	-0.245	-1.16	0.315	-0.475	-0.285	0.242	0.1
119391	GSTO2 || glutathione S-transferase omega 2 (1)	0.69	0.25	-0.25	-0.58	-0.29	-0.343	0.21	-4.77e-09	1.6	1.84	1.81
1195	CLK1 || CDC-like kinase 1 (2)	-0.465	-0.345	0.345	0.64	0.505	0.852	-0.425	0.38	5.51e-09	0.527	0.54
119504	C10orf104 || chromosome 10 open reading frame 104 (2)	0.0175	0.0875	-0.0175	-0.568	0.495	0.187	-0.57	0.818	-0.49	-0.388	0.117
119559	SFXN4 || sideroflexin 4 (1)	0.135	0.025	-0.025	-0.725	1.04e-08	0.197	0.15	0.245	-0.23	-0.358	0.005
1196	CLK2 || CDC-like kinase 2 (2)	0.025	0.465	-0.025	-0.695	-1.34e-08	0.007	0.14	0.07	0	-0.358	-0.45
119710	LOC119710 || hypothetical protein BC009561 (2)	0.145	0.435	-0.335	-0.145	0.848	1.01	-0.122	0.0725	0.0883	5.54e-08	0.107
1198	CLK3 || CDC-like kinase 3 (2)	-0.492	-0.158	0.328	0.158	-0.205	0.732	0.655	-0.453	-0.14	-0.0733	-1.2
120	ADD3 || adducin 3 (gamma) (5)	4.32e-09	5.44e-09	-0.19	0.895	2.95e-08	-0.119	-0.43	0.164	1.51	0.226	1.37
1200	TPP1 || tripeptidyl peptidase I (2)	0.0875	0.133	-0.263	-0.0875	-0.31	-0.283	2.86e-08	-0.223	1.66	0.642	0.677
120071	GYLTL1B || glycosyltransferase-like 1B (1)	-0.205	0.215	0.205	-0.865	-0.18	-0.713	1	-0.573	1.16	1.08	0.547
1201	CLN3 || ceroid-lipofuscinosis, neuronal 3, juvenile (Batten, Spielmeyer-Vogt disease) (2)	-0.0175	0.0175	0.107	-1.26	-0.695	-0.088	0.375	0.04	1.74e-08	0.887	-0.04
120103	SLC36A4 || solute carrier family 36 (proton/amino acid symporter), member 4 (1)	-0.52	-0.4	0.4	0.55	0.4	-0.313	-0.36	-0.473	0.22	-0.388	0.067
120227	CYP2R1 || cytochrome P450, family 2, subfamily R, polypeptide 1 (1)	-0.15	7.82e-09	0.25	5.81e-09	-0.117	5.36e-08	-0.067	0.155	0.703	0.315	0.895
120318	na || similar to 40S ribosomal protein S6 (Phosphoprotein NP33) (1)	0.3	0.28	-1.13	-0.28	0.49	0.667	-1.22	0.13	0.35	-0.748	0.62
120526	ZCSL3 || zinc finger, CSL domain containing 3 (1)	0.12	0.14	-0.12	-0.54	0.19	0.307	-1.08	0.395	-2.83e-09	-0.108	0.815
120534	FLJ38968 || hypothetical protein FLJ38968 (1)	2.82e-08	-0.01	0.81	0	8.05e-09	0.377	-1.36	-0.065	0.11	0.262	1.41
1207	CLNS1A || chloride channel, nucleotide-sensitive, 1A (2)	-0.443	-0.0125	0.278	0.0125	-9.84e-09	0.582	0.175	-0.708	0.1	-0.118	0.967
121053	MGC40397 || hypothetical protein MGC40397 (1)	3.29e-08	0.16	-0.18	0	1.09	1.21	-0.15	0.545	-0.01	-0.548	-0.165
121054	na || similar to Keratin, type I cytoskeletal 18 (Cytokeratin 18) (K18) (CK 18) (1)	-0.04	0.28	0.04	-1.31	3.9e-08	-0.123	0.42	-0.71	-0.16	0.382	0.06
1211	CLTA || clathrin, light polypeptide (Lca) (2)	-0.0925	0.233	0.0925	-0.507	-0.105	0.627	-0.095	-0.173	-0.04	-0.233	0.317
121260	SLC15A4 || solute carrier family 15, member 4 (1)	-0.185	0.125	0.095	-0.095	-0.067	-5.96e-09	-0.517	0.532	1.19	1.32	1.47
121268	RHEBL1 || Ras homolog enriched in brain like 1 (1)	-5.77e-08	-0.26	0.51	0	-0.207	-1.79e-08	0.243	-0.21	-0.907	0.0347	-0.22
1213	CLTC || clathrin, heavy polypeptide (Hc) (1)	-0.525	-0.335	0.335	0.345	0.78	0.687	-0.85	0.36	0	0.542	-0.23
121441	NEDD1 || neural precursor cell expressed, developmentally down-regulated 1 (1)	0.06	-0.06	-0.19	0.1	0.14	-0.053	-0.46	0.725	0.07	0.0717	0.235
121457	IKIP || IKK interacting protein (2)	-0.393	-0.273	0.273	0.578	0.885	0.797	-0.085	0.278	1.74e-08	-0.368	0.792
121536	AEBP2 || AE binding protein 2 (1)	-0.05	-0.11	0.13	0.05	0.318	-0.00465	0.338	-1.08	0.0583	1.49e-08	0.14
121642	MGC90512 || similar to hypothetical protein 9530023G02 (1)	0.055	-0.055	0.065	-0.495	-0.03	0.007	0.43	-0.67	-0.12	-0.0184	-0.06
122060	FLJ30046 || hypothetical protein FLJ30046 (1)	0.025	-0.025	0.215	-0.225	0.083	-2.03e-08	-0.217	0.8	0.073	0.355	0.46
122509	FAM14B || family with sequence similarity 14, member B (1)	0.76	0.51	-0.51	-1	0.32	-0.053	0.44	-0.613	-0.22	-0.218	0.167
122704	MRPL52 || mitochondrial ribosomal protein L52 (2)	0.515	0.28	-0.28	-0.53	-0.155	0.052	-0.425	-0.188	-0.62	-0.788	-0.838
122769	PPIL5 || peptidylprolyl isomerase (cyclophilin)-like 5 (4)	-0.229	-0.211	0.211	0.421	-0.62	-0.59	5.48e-08	-0.117	-0.603	0.282	0.106
122809	SOCS4 || suppressor of cytokine signaling 4 (1)	0.075	-0.075	0.085	-0.315	0.42	-1.18	0.2	0.135	-1.59e-08	0.582	0.89
122830	C14orf35 || chromosome 14 open reading frame 35 (2)	-0.615	-0.665	0.615	0.815	-0.0333	0.0687	0.242	0.474	0	0.0333	0.644
122953	JDP2 || jun dimerization protein 2 (1)	0.3	0.18	-0.37	-0.18	0.74	-0.183	0.16	-0.27	-0.16	-0.428	-1.63
122961	HBLD1 || HESB like domain containing 1 (1)	0.115	-0.115	0.205	-0.295	2.71e-08	-0.003	0.5	-0.245	0.48	0.742	0.665
123	ADFP || adipose differentiation-related protein (1)	-0.61	-0.42	0.42	0.45	-0.32	0.487	-0.21	-0.243	0.34	0.252	0.287
123016	TTC8 || tetratricopeptide repeat domain 8 (2)	-0.425	-0.365	0.575	0.365	-6.26e-09	0.332	-0.57	0.09	0.65	-0.218	0.81
123169	LOC123169 || senescence downregulated leo1-like (1)	-0.025	0.025	-0.935	1	0.27	0.017	-4.53e-08	-0.348	-0.17	-1.96	-0.198
123346	LOC123346 || hypothetical protein LOC123346 (1)	1.14e-07	0.01	-0.11	0	-0.8	-0.003	0.6	-0.365	-0.39	0.732	-0.615
123355	LRRC28 || leucine rich repeat containing 28 (1)	0.31	-0.02	0.02	-0.37	-0.52	-0.423	0.22	-0.108	1.24	1.08	0.892
123720	KIAA1971 || similar to junction-mediating and regulatory protein p300 JMY (1)	-0.155	-0.145	0.335	0.145	-0.017	1.19e-09	-0.797	0.055	0.643	0.235	0.935
123803	NTAN1 || N-terminal asparagine amidase (2)	-0.095	-0.035	0.415	0.035	-0.1	-0.373	-0.41	0.002	0.23	-0.0883	0.242
123811	FLJ31153 || hypothetical protein FLJ31153 (2)	0.142	-0.412	0.0775	-0.0775	0.86	0.792	-0.07	-0.108	3.13e-09	-0.378	0.108
123920	CKLFSF3 || chemokine-like factor super family 3 (1)	0.285	0.345	-0.285	-0.765	-0.207	-1.55e-08	0.083	0.577	0.303	1.23	0.207
124044	MGC26885 || hypothetical protein MGC26885 (1)	-0.13	9.6e-08	0.19	0	-0.51	-0.703	1.39	0.075	-0.29	1.24	-0.615
124152	MGC35048 || hypothetical protein MGC35048 (1)	-0.23	0.01	0.24	-0.01	-0.108	0.108	-0.538	5.6e-08	1.5	1.07	0.67
124245	LOC124245 || hypothetical protein BC001584 (2)	0.158	0.138	-0.362	-0.138	0.785	-0.098	1.78	-0.112	0.295	-0.943	-0.911
124401	KIAA1977 || KIAA1977 protein (1)	0.605	0.605	-0.715	-0.605	0.408	-0.385	0.678	-0.195	-0.702	2.92e-08	-0.375
124402	LOC124402 || LOC124402 (2)	0.11	0.27	-0.11	-0.87	-0.775	-0.653	0.87	-0.35	-0.77	0.402	-0.82
124446	LOC124446 || hypothetical protein BC017488 (1)	0.53	0.3	-0.3	-0.9	-0.59	-0.503	-1.43e-08	-5.96e-09	-0.81	-0.848	-0.64
124454	KIAA1970 || KIAA1970 protein (2)	-0.545	-0.095	0.095	0.22	0.035	-0.188	-0.235	-0.268	0.745	-0.0683	-0.403
124491	LOC124491 || LOC124491 (1)	0.325	-0.015	-0.055	0.015	-0.047	-3.35e-10	0.123	0.21	0.013	-0.185	0.29
124512	LOC124512 || hypothetical protein LOC124512 (2)	0.207	0.388	-0.207	-0.973	-0.06	0.062	-0.025	-0.107	5.51e-09	0.982	0.858
124540	MSI2 || musashi homolog 2 (Drosophila) (3)	0.202	-0.202	-1.58	0.445	0.153	-0.142	-0.152	-0.098	0.0457	-0.0457	0.098
124565	MGC15523 || hypothetical protein MGC15523 (1)	0.27	0.28	-0.27	-0.91	-0.42	-0.743	0.83	0.105	0.03	1	-0.545
124637	FLJ32499 || hypothetical protein FLJ32499 (1)	-0.44	-0.27	0.27	0.28	0.08	0.257	-0.09	-0.298	1.15	0.332	1.23
124685	na || similar to Myosin light polypeptide 6 (Myosin light chain alkali 3) (Myosin light chain 3) (MLC-3) (LC17) (1)	0.49	0.63	-0.49	-0.92	-0.71	0.187	-0.73	0.337	0.58	1.13	1.53
124801	FLJ30656 || hypothetical protein FLJ30656 (3)	-0.296	0.001	0.414	-0.001	0.013	-0.093	3.58e-09	0.642	-0.5	-0.485	-0.693
124808	FLJ31795 || hypothetical protein FLJ31795 (1)	-0.115	-0.195	0.115	0.775	0.39	0.197	-0.26	0.297	-0.21	-1.19	-0.303
124930	FLJ25555 || hypothetical protein FLJ25555 (1)	0.535	0.375	-0.375	-1.14	-0.381	-0.514	-0.0308	0.18	0.929	-0.00918	-0.8
124936	MGC32124 || hypothetical protein MGC32124 (1)	0.345	0.315	-0.485	-0.315	0.0465	-0.0465	0.167	-0.81	-0.464	-0.172	0.02
124944	MGC49942 || hypothetical protein MGC49942 (2)	0.482	0.443	-0.443	-0.502	-0.0817	0.53	0.823	0.107	-0.587	-6.56e-09	-0.703
124997	FLJ33817 || hypothetical protein FLJ33817 (1)	-4.02e-09	0.16	-0.41	0	-0.1	-0.653	0.92	-0.013	0.07	0.212	0.017
125050	RN7SK || RNA, 7SK, nuclear (1)	0.86	0.76	-0.76	-0.99	-0.91	0.077	1.65	0.945	-0.71	1.25	-0.065
125061	AFMID || arylformamidase (2)	-0.465	-0.01	0.23	0.01	0.066	0.555	-1e-08	-0.033	-0.512	-0.263	-0.259
125144	MGC40157 || hypothetical protein MGC40157 (2)	0.28	0.275	-0.275	-0.635	-0.005	0.482	0.005	0.565	0	-0.498	-0.545
125150	LOC125150 || hypothetical protein LOC125150 (1)	0.3	0.21	-0.21	-0.38	0.72	0.207	-0.13	-0.623	0.8	-0.298	0.387
125476	C18orf37 || chromosome 18 open reading frame 37 (5)	0.0715	0.124	-0.0715	-0.301	-1.13e-09	-0.003	-0.706	-0.115	1.4	0.659	2.15
125919	ZNF543 || zinc finger protein 543 (1)	0.01	-0.55	5.39e-08	0	0.579	0.226	-0.611	0.042	-0.811	0.111	0.252
125950	RAVER1 || RAVER1 (2)	0.253	0.142	-0.142	-0.438	-0.61	-0.888	0.18	-0.27	0.84	0.0566	-0.74
125988	QIL1 || QIL1 protein (2)	0.525	0.205	-0.205	-0.89	-0.342	7.15e-09	0.868	0.067	-1.01	-0.115	-0.668
126003	TRAPPC5 || trafficking protein particle complex 5 (1)	0.49	0.24	-0.24	-0.56	-0.44	-0.223	1.33	-0.295	-1.07	0.242	-0.265
126074	FLJ35119 || hypothetical protein FLJ35119 (1)	-3.86e-08	-0.06	0.07	0	-0.47	-0.003	1.01	-0.578	1.1	2.1	1.74
126119	SBBI54 || hypothetical transmembrane protein SBBI54 (2)	0.2	0.27	-0.2	-0.22	-0.63	-0.443	0.69	-0.748	-1.24e-08	0.872	-0.422
126129	CPT1C || carnitine palmitoyltransferase 1C (1)	0.2	0.4	-0.2	-1.31	0.37	0.177	-4.47e-10	-0.075	-0.22	-0.948	0.075
126133	ALDH16A1 || aldehyde dehydrogenase 16 family, member A1 (1)	-0.105	0.235	0.105	-0.845	0.22	-0.423	2.21	-0.525	-0.37	1.34	-1.19
126170	na || similar to peptidyl-Pro cis trans isomerase (1)	-0.105	-0.135	0.155	0.105	-0.227	1.79e-08	0.093	0.13	-0.917	0.0246	-0.13
126208	LOC126208 || hypothetical protein LOC126208 (1)	0.27	0.18	-0.18	-1.17	-0.355	-0.433	1.03	-0.133	-0.6	0.162	-1.13
126295	LOC126295 || hypothetical protein LOC126295 (1)	-0.235	-0.375	0.465	0.235	0.03	-0.123	-0.94	-0.383	-1.36e-08	-0.178	0.787
1263	PLK3 || polo-like kinase 3 (Drosophila) (1)	-0.055	0.035	0.205	-0.035	0.52	-0.153	0.64	-0.045	0.8	0.952	-0.025
126308	MOBKL2A || MOB1, Mps One Binder kinase activator-like 2A (yeast) (1)	0.235	0.095	-0.095	-0.545	-0.27	-0.513	-0.18	0.175	1.08	-0.0384	-0.335
126321	C19orf28 || chromosome 19 open reading frame 28 (2)	-0.19	0.19	0.32	-1.48	-0.277	-5.36e-09	0.263	-0.0975	-0.627	0.635	-1.45
126353	C19orf21 || chromosome 19 open reading frame 21 (1)	0.305	0.145	-0.145	-0.595	-0.32	-0.613	0.07	-0.875	0.27	0.172	-0.075
126364	LRRC25 || leucine rich repeat containing 25 (1)	0.105	0.205	-0.105	-0.655	-2.06e-08	-0.353	0.51	-1.08	0.48	0.582	0.117
126382	TRA16 || TR4 orphan receptor associated protein TRA16 (2)	0.0375	0.0475	-0.0375	-0.677	-0.331	4.17e-10	0.579	-0.457	-0.367	0.241	0.264
126402	FLJ40365 || hypothetical protein FLJ40365 (1)	-0.065	-0.075	0.105	0.065	-0.42	-0.423	0.58	-0.3	0.04	0.442	-0.24
1265	CNN2 || calponin 2 (5)	0.227	0.169	-0.169	-0.286	-0.0717	0.192	0.335	-0.195	-0.108	-0.473	-1.55
1266	CNN3 || calponin 3, acidic (1)	0.005	-0.145	0.065	-0.005	-0.43	-1.14	-0.65	-0.753	0.81	0.482	1.12
126661	LOC126661 || hypothetical protein LOC126661 (2)	0.372	0.263	-0.667	-0.263	-0.97	-0.413	0.1	-0.375	-4.47e-10	0.167	0.185
126792	B3GALT6 || UDP-Gal:betaGal beta 1,3-galactosyltransferase polypeptide 6 (1)	0.26	0.45	-0.26	-0.29	0.26	-0.203	0.63	-0.743	0.29	-0.318	-0.543
126917	LOC126917 || hypothetical protein LOC126917 (2)	0.78	0.45	-0.45	-0.82	0.765	-0.733	0.33	0.047	0.04	-1.25	0.007
127018	LYPLAL1 || lysophospholipase-like 1 (2)	-0.525	-0.205	0.205	0.34	0.645	0.852	-1.31e-08	0.152	-0.285	-0.228	-0.152
127253	LOC127253 || hypothetical protein BC009514 (2)	0.24	-0.24	-1.39	0.84	0.438	0.389	-1.52	0.296	0.115	-1.3	0.0335
127262	LOC127262 || hypothetical protein LOC127262 (1)	-0.24	-0.28	0.24	0.48	-0.375	0.217	0.32	0.0325	-0.03	-0.183	-0.0325
127281	MGC26818 || hypothetical protein MGC26818 (1)	0.2	0.39	-0.2	-1.26	0.238	-0.325	0.598	-0.803	-0.0517	-1.01e-08	-1.78
127428	C1orf83 || chromosome 1 open reading frame 83 (1)	6.11e-09	-0.14	0.57	0	3.28e-09	0.637	-0.625	0.0985	-0.11	-0.0583	0.108
127550	LOC127550 || similar to iGb3 synthase (1)	0.58	0.31	-0.31	-0.93	-0.03	0.357	0.51	0.817	-0.5	-0.378	-0.133
127557	ZBTB8 || zinc finger and BTB domain containing 8 (1)	-0.09	-0.31	0.34	0.09	0.22	0.227	-0.41	-0.303	-0.01	-0.568	0.727
127687	FLJ45459 || FLJ45459 protein (2)	0.302	0.383	-0.302	-0.998	-0.31	-0.338	1.05	-0.185	-1.25	0.477	-0.59
127700	NOR1 || oxidored-nitro domain-containing protein (5)	-0.341	-0.202	0.676	0.202	0.362	0.565	-0.112	0.15	-1.64e-08	-0.192	-0.09
127933	UHMK1 || U2AF homology motif (UHM) kinase 1 (1)	-0.135	-0.175	0.135	0.335	-0.0558	-0.419	-0.256	-0.145	0.814	0.0558	0.8
128	ADH5 || alcohol dehydrogenase 5 (class III), chi polypeptide (4)	-0.2	-0.25	0.22	0.2	-0.275	0.402	-0.595	-0.0585	0.505	0.537	1.45
128077	LIX1L || Lix1 homolog (mouse) like (1)	-0.055	-0.105	0.365	0.055	-0.077	-2.38e-09	-0.087	0.275	1.01	-0.0454	0.685
128153	LOC128153 || hypothetical protein BC014608 (1)	-0.375	-0.095	0.095	0.145	1.1	1.17	-0.45	0.002	-1.36e-08	-0.258	0.532
128229	SSTK-IP || SSTK-interacting protein (1)	0.34	2.21e-08	-0.17	0	-0.32	0.007	0.09	-0.82	-0.58	0.342	-0.39
128240	APOA1BP || apolipoprotein A-I binding protein (2)	0.425	0.145	-0.145	-0.65	6.86e-09	-0.058	0.665	-0.173	-0.525	-0.263	-0.448
128322	na || similar to Nuclear transport factor 2 (NTF-2) (1)	0.01	-0.01	0.27	-0.52	-1.1	-0.373	0.11	-0.433	0.85	0.702	1.15
128439	LOC128439 || hypothetical gene LOC128439 (1)	0.2	0.4	-0.2	-0.47	-0.34	0.247	1.22	0.095	-0.84	0.842	-0.095
128637	TBC1D20 || TBC1 domain family, member 20 (1)	-0.65	-0.26	0.31	0.26	0.11	0.497	4.53e-08	-0.755	0.71	0.262	0.245
1287	COL4A5 || collagen, type IV, alpha 5 (Alport syndrome) (1)	0.51	-0.04	-0.5	0.04	1.07	0.197	1.03	0.605	5.51e-09	-0.188	-0.425
128869	CDC91L1 || CDC91 cell division cycle 91-like 1 (S. cerevisiae) (2)	0.03	0.08	-0.03	-0.91	-0.63	0.037	0.215	-0.0355	-1.64e-09	0.427	0.669
128977	LOC128977 || hypothetical protein LOC128977 (1)	0.36	0.91	-0.36	-0.63	0.62	0.737	-0.85	1.08	0	-1.44	0.125
128989	DKFZp761P1121 || hypothetical protein DKFZp761P1121 (2)	0.28	-0.2	0.2	-0.205	-1.49e-09	-0.573	0.63	-0.0375	-0.65	-0.338	-0.177
1291	COL6A1 || collagen, type VI, alpha 1 (1)	0.615	0.415	-0.415	-0.585	0.42	-0.473	0.3	0.092	-1.36e-08	-0.958	-1.26
129138	LOC129138 || hypothetical protein BC014641 (2)	-0.552	0.203	0.237	-0.203	-0.367	1.43e-08	0.988	-0.188	-0.567	0.275	-0.993
129401	NUP35 || nucleoporin 35kDa (3)	-0.169	-0.151	0.151	0.236	-0.0367	0.55	-0.117	0.972	-0.602	-1.37e-08	0.421
129450	FLJ37953 || hypothetical protein FLJ37953 (2)	-0.468	-0.333	0.333	1.86	0.51	0.582	-0.615	0.107	0.44	-0.148	0.593
129530	LOC129530 || hypothetical protein LOC129530 (1)	0.03	-0.03	0.77	-0.08	0.358	0.345	0.0284	0.48	0.0184	-1.79e-09	0.25
129531	LOC129531 || hypothetical protein BC018453 (1)	-0.28	-0.16	0.41	0.16	0.94	0.557	-0.23	0.06	0.27	-0.748	-0.06
129563	MGC42174 || hypothetical protein MGC42174 (1)	0.26	0.24	-0.24	-0.71	0.01	-0.653	1.26	-0.18	-0.05	0.642	-0.96
129642	OACT2 || O-acyltransferase (membrane bound) domain containing 2 (3)	-0.661	-0.382	0.382	0.854	-0.122	1.79e-08	-0.177	-0.127	1.06	0.2	0.692
129787	TMEM18 || transmembrane protein 18 (1)	-0.04	0.04	0.21	-0.12	-5.22e-10	0.317	-0.06	0.067	0.22	-0.978	-0.663
129831	DRB1 || developmentally regulated RNA-binding protein 1 (1)	-0.33	0.1	0.41	-0.1	-1.79e-09	0.257	-0.33	0.622	0	-0.588	0.142
130340	AP1S3 || adaptor-related protein complex 1, sigma 3 subunit (1)	-0.975	-0.585	0.585	0.805	0.21	0.167	-0.23	-0.281	0.02	-0.618	0.244
130355	LOC130355 || hypothetical protein LOC130355 (1)	0.25	0.6	-0.4	-0.25	0.518	0.535	-0.292	0.71	2.19	1.97e-08	-0.14
130429	na || similar to 40S ribosomal protein SA (p40) (34/67 kDa laminin receptor) (Colon carcinoma laminin-binding protein) (NEM/1CHD4) (Multidrug resistance-associated protein MGr1-Ag) (1)	0.05	-0.05	0.09	-0.29	-0.025	0.732	0.025	0.075	-0.575	0.437	-0.015
130535	KCTD18 || potassium channel tetramerisation domain containing 18 (1)	-0.715	-0.195	0.355	0.195	0.597	-0.0865	-0.293	-0.1	0.666	0.508	0.71
130557	ZNF513 || zinc finger protein 513 (1)	0.125	0.035	-0.035	-0.535	0.248	-0.565	0.828	-0.07	-0.202	5.36e-09	-0.99
130574	MGC52057 || hypothetical protein MGC52057 (1)	0.135	0.135	-0.135	-0.355	0.0942	-0.249	-0.506	-0.553	1.32	-0.0242	0.877
130612	MGC99813 || similar to RIKEN cDNA A230078I05 gene (1)	-0.09	0.12	-2.71e-08	0	-0.0935	0.0535	1.4	-0.14	-0.464	1.47	-1.31
130617	LOC130617 || hypothetical protein BC018415 (3)	0.11	0.446	-0.11	-1.37	-0.413	0.007	1.25	-0.0665	-0.033	1.28	0.0665
130678	na || similar to 60S acidic ribosomal protein P1 (1)	-0.26	-4.22e-08	0.02	0	-1.06	-1.79e-08	0.363	0.62	-2.02	-0.225	-0.62
130773	na || similar to 60S ribosomal protein L23a (1)	0.375	0.725	-0.425	-0.375	-0.08	0.507	-0.87	0.882	-0.92	-0.778	-0.318
130814	C2orf22 || chromosome 2 open reading frame 22 (2)	-0.1	0.035	0.04	-0.035	-0.302	-4.77e-09	0.503	-0.3	0.573	0.685	0.565
130865	na || similar to 60S ribosomal protein L26-like 1 (1)	0.11	0.33	-0.73	-0.11	0.83	0.777	-1.67	0.695	-0.83	-1.24	-0.695
130888	FBXO36 || F-box protein 36 (1)	-0.035	0.035	0.365	-0.405	0.35	0.367	-0.35	0.0545	0.96	0.572	0.83
131076	LOC131076 || hypothetical LOC131076 (1)	-0.135	0.175	-0.075	0.075	0.4	0.087	-0.15	-0.01	-1.24e-08	-0.388	0.01
1312	COMT || catechol-O-methyltransferase (3)	-0.738	-0.0175	0.0925	0.0175	-0.77	-0.146	0.75	-0.71	-4.02e-09	0.809	0.15
1314	COPA || coatomer protein complex, subunit alpha (1)	-2.24e-10	8.94e-10	-0.32	0	0.14	-0.033	0.07	0.54	-0.31	-0.258	-0.12
131408	MGC21688 || hypothetical protein MGC21688 (1)	0.21	0.66	-0.21	-0.84	1.52e-08	-0.643	0.2	-0.448	0.49	0.642	0.742
131474	CHCHD4 || coiled-coil-helix-coiled-coil-helix domain containing 4 (2)	-0.0625	0.0625	-0.172	0.362	0.09	0.627	-0.39	-0.01	-0.3	0.332	0.01
1315	COPB || coatomer protein complex, subunit beta (1)	-0.3	-0.5	0.3	0.45	0.253	9.54e-09	-0.027	-0.448	0.883	-0.365	0.572
131544	DKFZp667G2110 || hypothetical protein DKFZp667G2110 (1)	0.25	-0.08	-0.08	0.08	0.476	-0.0265	0.536	0.38	0	-0.572	-0.23
131566	DCBLD2 || discoidin, CUB and LCCL domain containing 2 (1)	-0.11	0.03	-0.03	0.21	0.083	-2.98e-10	-0.557	0.93	-0.867	-0.425	0.24
131583	FAM43A || family with sequence similarity 43, member A (1)	0.2	0.31	-0.2	-0.54	-0.291	-0.884	0.859	0.19	0.529	0.121	-0.44
131601	GPR175 || G protein-coupled receptor 175 (2)	0.29	0.3	-0.315	-0.29	-1.25	-0.203	0.78	0.258	0.43	1.04	-0.258
131616	TMEM42 || transmembrane protein 42 (1)	0.35	0.05	-0.05	-0.37	-0.37	0.097	0.76	0.045	-0.5	0.0316	-0.045
131691	na || similar to peptidylprolyl isomerase A (1)	0.49	-0.1	0.1	-0.26	-0.162	0.395	0.0984	0.435	-0.152	1.37e-08	0.075
1317	SLC31A1 || solute carrier family 31 (copper transporters), member 1 (3)	-0.16	-0.306	0.16	0.59	-0.39	-0.03	6.68e-09	-0.238	0.913	0.0916	1.11
1318	SLC31A2 || solute carrier family 31 (copper transporters), member 2 (1)	-0.115	0.115	0.355	-0.175	-0.34	-0.323	-0.31	-0.143	0.65	0.792	1.41
131870	NUDT16 || nudix (nucleoside diphosphate linked moiety X)-type motif 16 (2)	0.57	0.09	-0.88	-0.09	-0.317	4.41e-08	0.023	-0.39	-0.067	-0.625	0.21
131965	MGC24132 || hypothetical protein MGC24132 (3)	-0.125	-0.245	0.405	0.125	0.217	0.434	-0.373	-0.03	1.31e-08	-0.346	0.08
132	ADK || adenosine kinase (1)	0.05	-0.05	0.48	-0.15	0.328	0.465	-0.462	0.505	0.378	1.49e-08	0.645
132001	MGC16471 || hypothetical protein BC015088 (2)	0.1	-0.06	0.06	-0.23	-0.065	-0.073	-0.55	-0.378	-5.21e-09	0.332	0.762
132241	LOC132241 || hypothetical protein LOC132241 (2)	1.75	0.265	-0.265	-1.8	0.56	0.657	0.62	-0.233	-9.46e-08	-0.598	-0.593
132320	FLJ30655 || hypothetical protein FLJ30655 (1)	-0.105	0.825	0.105	-0.345	0.85	1.03	-0.4	0.375	0	-1.78	0.255
1325	CORT || cortistatin (2)	0.333	0.102	-0.102	-0.848	-0.353	-0.303	-0.61	-0.899	-0.0133	0.0267	0.297
132556	na || similar to Transcription factor BTF3 homolog 3 (1)	-0.08	0.32	-0.08	0.08	0.055	0.342	0.075	0.32	-0.645	-0.833	1.97e-08
132720	FLJ39370 || hypothetical protein FLJ39370 (1)	-0.08	1.26e-08	0.4	0	0.56	-0.003	-0.23	-0.19	0.3	0.402	0.61
1329	COX5B || cytochrome c oxidase subunit Vb (2)	0.37	0.205	-0.205	-0.735	-0.18	0.352	0.395	0.0575	-0.94	-0.598	-0.152
133	ADM || adrenomedullin (2)	-0.932	0.212	0.637	-0.212	-0.71	0.117	-0.425	-0.338	-0.24	0.972	0.932
133015	MGC29898 || hypothetical protein MGC29898 (2)	-0.598	-0.323	0.323	0.472	-0.055	0.377	9.54e-09	0.347	0.56	0.0167	1.11
133790	na || similar to ribosomal protein S18 (1)	-4.47e-10	0.05	-0.44	0	-0.02	0.687	-0.34	1.02	-0.89	0.00165	-0.23
134218	DNAJA5 || DnaJ homology subfamily A member 5 (2)	0.095	-0.095	-0.445	0.745	-0.295	0.402	0.255	0.187	-0.255	-0.733	0.137
134266	GRPEL2 || GrpE-like 2, mitochondrial (E. coli) (1)	-0.065	-0.195	0.105	0.065	0.273	-1.79e-08	-0.607	-0.1	-0.397	-1.08	0.05
134359	FLJ35779 || hypothetical protein FLJ35779 (2)	-0.03	-0.3	0.41	0.03	0.00835	-0.43	0.0284	-0.445	-0.577	4.11e-08	-0.02
134429	STARD4 || START domain containing 4, sterol regulated (1)	3.77e-08	-0.35	0.31	0	-0.63	-0.383	-0.84	-0.07	2.09	0.792	2.15
134430	WDR36 || WD repeat domain 36 (1)	0.125	-0.215	-0.125	1.15	-0.03	0.367	0.42	-0.045	-0.36	0.562	0.225
134492	NUDCD2 || NudC domain containing 2 (2)	-0.145	0.345	-0.335	0.145	0.84	0.827	-0.875	0.875	-0.235	0.477	-0.15
134548	ANKRD43 || ankyrin repeat domain 43 (1)	-0.135	0.135	0.425	-0.735	0.22	-0.233	-0.23	-0.698	0.63	-0.168	0.602
134553	FLJ37562 || hypothetical protein FLJ37562 (1)	-0.02	0.02	-1.36	1.17	0.2	0.197	-0.38	0.52	0.54	0.252	0.8
1347	COX7A2 || cytochrome c oxidase subunit VIIa polypeptide 2 (liver) (2)	0.107	0.352	-0.107	-0.502	-1.1e-08	0.287	0.34	0.38	-0.95	-0.988	-0.75
1348	COX7AP2 || cytochrome c oxidase subunit VIIa pseudogene 2 (1)	0.27	0.5	-0.28	-0.27	0.08	0.767	-0.38	1.19	-0.93	-0.268	0.045
1349	COX7B || cytochrome c oxidase subunit VIIb (2)	1.62e-08	0.165	-0.48	0	0.27	0.417	-0.9	0.68	-0.85	-0.708	-0.41
1351	COX8A || cytochrome c oxidase subunit 8A (ubiquitous) (1)	0.445	0.135	-0.135	-0.435	-0.692	0.435	0.828	0.29	-1.06	-4.77e-09	-0.01
135114	HINT3 || histidine triad nucleotide binding protein 3 (1)	-0.685	0.095	-0.095	0.755	0.588	0.515	-1.48	0.4	0.398	5.96e-09	1.4
135138	PACRG || PARK2 co-regulated (1)	-0.02	0.02	0.2	-0.34	-0.235	0.182	-0.065	-1.01	2.33	1.91	2.04
135293	ACY1L2 || aminoacylase 1-like 2 (1)	-0.155	-0.095	0.095	1.53	-0.037	-8.94e-10	-0.787	-0.153	0	0.345	0.407
135295	SRrp35 || serine-arginine repressor protein (35 kDa) (1)	-0.28	0.18	0.38	-0.18	0.491	0.199	-0.648	0.165	0	-1.44	0.065
1353	COX11 || COX11 homolog, cytochrome c oxidase assembly protein (yeast) (2)	0.122	0.0025	-0.343	-0.0025	0.45	0.072	-0.095	-0.178	6.71e-09	-0.218	0.334
1355	COX15 || COX15 homolog, cytochrome c oxidase assembly protein (yeast) (2)	-0.37	-0.675	0.37	0.905	-0.0916	0.162	-0.202	-0.418	0.313	-5.96e-10	0.482
135521	FKBP1C || FK506 binding protein 1C (1)	0.36	0.4	-0.36	-0.46	-0.222	-0.165	-0.132	0.722	0.208	-4.1e-10	-0.468
136	ADORA2B || adenosine A2b receptor (1)	0.2	0.13	-0.13	-0.55	-0.33	-0.253	-0.22	-0.118	0.41	0.492	0.732
1362	CPD || carboxypeptidase D (1)	-0.085	-0.495	0.085	0.495	0.35	0.357	-0.425	-0.398	1.65	0.772	1.01
1363	CPE || carboxypeptidase E (1)	-0.68	0.01	-0.01	0.4	2.98e-10	0.357	-0.46	0.855	0.25	-0.368	0.435
136319	MTPN || myotrophin (1)	0.045	0.035	-0.245	-0.035	-0.17	-0.513	-1.1	-1.07	2.94e-08	-0.458	0.264
136647	C7orf11 || chromosome 7 open reading frame 11 (1)	0.165	0.345	-0.165	-0.205	0.11	0.537	7.45e-11	0.07	-0.93	-0.318	-0.21
137107	na || similar to ribosomal protein L10a (1)	0.26	0.12	-0.39	-0.12	0.0384	0.165	-0.932	0.075	-0.452	2.38e-09	-0.075
137392	LOC137392 || similar to CG6405 gene product (1)	-0.27	-0.3	0.45	0.27	0.06	-0.083	-0.76	-0.045	1.2	0.182	0.44
1376	CPT2 || carnitine palmitoyltransferase II (1)	-0.195	0.295	-0.285	0.195	-0.4	-0.133	1.19e-08	-0.313	1.14	0.922	0.917
137682	MGC40214 || hypothetical protein MGC40214 (1)	-0.275	0.155	0.425	-0.155	0.69	0.357	-0.73	-0.26	-0.2	0.462	0.9
137695	FLJ32370 || hypothetical protein FLJ32370 (1)	0.01	-0.01	0.08	-0.23	0.206	-0.0273	-0.824	-0.478	0.746	0.0273	1.12
137886	LOC137886 || hypothetical protein LOC137886 (2)	-0.175	0.175	-0.185	0.18	0.095	0.097	-0.305	0.354	0.23	-0.373	0.291
137964	DKFZp586M1819 || putative lysophosphatidic acid acyltransferase (1)	0.005	0.285	-0.795	-0.005	-0.13	0.507	0.33	-0.65	1.11	0.0216	0.08
137994	LETM2 || leucine zipper-EF-hand containing transmembrane protein 2 (3)	-0.38	-0.33	0.33	0.43	0.257	0.0535	-0.353	0.027	-0.0535	0.358	-1.11
138050	FLJ32731 || hypothetical protein FLJ32731 (1)	0.3	0.16	-0.16	-0.28	2.24e-08	-0.713	0.7	0.212	0	0.322	-0.798
138162	C9orf116 || chromosome 9 open reading frame 116 (1)	0.18	-0.1	2.06e-08	0	-0.18	0.467	0.04	-0.535	0.36	0.502	0.105
138199	C9orf41 || chromosome 9 open reading frame 41 (1)	-0.09	-2.79e-08	0.21	0	1.86e-10	-0.493	-0.51	-0.375	1.7	0.642	1.49
138241	C9orf85 || chromosome 9 open reading frame 85 (3)	-0.393	-0.133	0.133	0.163	0.26	0.66	-1.54	0.315	1.46	0.772	1.96
138311	MGC20262 || hypothetical protein MGC20262 (1)	-0.01	0.01	0.15	-0.83	0.04	-0.583	1.35	-0.46	-0.75	0.242	-0.27
1384	CRAT || carnitine acetyltransferase (2)	-0.0075	0.188	0.0075	-0.472	-0.21	-0.688	3.28e-09	-0.267	0.675	0.36	-0.587
138428	C9orf115 || chromosome 9 open reading frame 115 (1)	-0.02	0.29	0.02	-0.37	-0.087	9.54e-09	0.758	-0.253	-0.527	0.545	0.0875
1385	CREB1 || cAMP responsive element binding protein 1 (3)	-0.689	-0.181	0.181	0.476	0.193	0.28	-0.184	0.26	0.233	-7.15e-09	0.93
1386	ATF2 || activating transcription factor 2 (1)	-0.045	0.045	-0.055	0.965	0.21	0.277	-1.06	0.685	-0.14	0.552	0.515
1387	CREBBP || CREB binding protein (Rubinstein-Taybi syndrome) (1)	0.14	-0.08	-0.22	0.08	0.843	3.28e-09	-0.087	0.155	-0.527	-0.325	-0.145
139285	FLJ39827 || hypothetical protein FLJ39827 (1)	0.23	0.05	-0.05	-0.06	0.263	5.96e-09	0.583	-0.08	0.603	-0.0353	0.22
139341	FUNDC1 || FUN14 domain containing 1 (1)	0.095	0.225	-0.095	-0.125	0.41	0.347	-0.8	0.08	-0.38	-0.698	0.04
139596	RP11-311P8.3 || hypothetical protein MGC23937 similar to CG4798 (1)	-0.03	0.03	0.27	-0.07	0.08	0.357	-0.27	-0.025	1.49e-10	-0.638	0.055
1397	CRIP2 || cysteine-rich protein 2 (1)	0.115	0.095	-0.095	-0.675	-0.566	-0.824	0.769	-0.27	-0.651	0.246	-0.875
1398	CRK || v-crk sarcoma virus CT10 oncogene homolog (avian) (2)	-0.37	0.05	-0.05	1.75	-0.93	0.067	-0.23	0.292	0.39	-0.378	-0.123
139886	LOC139886 || hypothetical protein LOC139886 (1)	0.66	0.1	-0.1	-0.38	-6.26e-09	-0.263	-0.25	0.365	0.15	0.772	1.15
14	AAMP || angio-associated, migratory cell protein (1)	0.275	0.415	-0.415	-0.275	0.233	-2.5e-08	0.323	0.212	-0.717	-1.05	-0.868
140290	TCP10L || t-complex 10 (mouse)-like (2)	0.15	0.09	-0.09	-0.83	0.79	0.667	0.09	0.317	-0.52	-0.458	-0.168
140459	ASB6 || ankyrin repeat and SOCS box-containing 6 (2)	0.135	-0.085	0.085	-1.35	0.225	-0.128	0.055	-0.312	-0.055	-0.523	-0.0275
140460	ASB7 || ankyrin repeat and SOCS box-containing 7 (3)	-0.329	-0.296	0.296	0.457	0.196	-0.0375	0.0375	-0.157	-0.252	0.192	0.528
140461	ASB8 || ankyrin repeat and SOCS box-containing 8 (2)	-0.28	-0.075	0.075	0.16	0.36	0.377	-0.525	0.152	-0.1	-0.0483	0.0675
140465	MLC1SA || myosin light chain 1 slow a (1)	0.08	-1.36e-08	-0.88	0	-2.77e-08	-0.203	0.43	0.01	-0.14	-0.208	-0.01
140467	ZNF358 || zinc finger protein 358 (2)	0.47	-0.76	0.45	-0.45	-0.32	-0.623	0.46	-0.275	0.28	0.932	-1.58
140606	SELM || selenoprotein M (1)	-9.98e-09	-0.46	-8.05e-09	0	-0.8	-0.123	-2.38e-09	-0.375	0.9	1.97	0.765
140680	C20orf96 || chromosome 20 open reading frame 96 (1)	0.355	0.035	-0.275	-0.035	-0.33	0.027	-9.54e-09	-0.203	-0.14	-0.0384	-1.7
1407	CRY1 || cryptochrome 1 (photolyase-like) (1)	0.01	-0.04	0.32	-0.01	0.393	-1.79e-09	-0.177	-0.325	0.163	-0.0154	0.825
140707	BRI3BP || BRI3 binding protein (1)	-1.7	-0.535	0.535	2.73	0.0765	0.0235	0.426	-0.218	-0.293	-0.702	-0.178
140730	RIMS4 || regulating synaptic membrane exocytosis 4 (1)	0.05	0.12	-0.05	-0.73	0.29	-0.523	0.79	-0.503	0.13	-0.658	-0.043
140738	TMEM37 || transmembrane protein 37 (2)	0.025	-0.025	0.115	-0.295	-0.16	-0.133	0.515	0.115	0.04	0.622	-0.12
140739	NCE2 || NEDD8-conjugating enzyme (4)	0.005	-0.005	0.297	-0.06	0.085	0.825	-0.417	0.477	1.18	-0.115	0.17
140801	RPL10L || ribosomal protein L10-like (1)	-0.195	-0.135	0.145	0.135	-0.7	0.217	0.23	0.27	-1.92	-0.188	-0.91
140809	SRXN1 || sulfiredoxin 1 homolog (S. cerevisiae) (1)	-0.325	-0.175	0.175	0.475	-0.01	0.047	-0.62	0.222	0.05	-1.2	-0.538
140823	C20orf52 || chromosome 20 open reading frame 52 (1)	0.59	0.24	-0.24	-0.65	-0.63	0.037	0.14	0.272	-1.2	-0.428	-0.568
140826	BXDC1P || brix domain containing 1 pseudogene (1)	0.055	0.745	-0.665	-0.055	0.82	0.557	-1.54	0.155	0.13	-0.738	-0.085
140831	ZSWIM3 || zinc finger, SWIM domain containing 3 (1)	0.03	1.02e-08	-0.25	0	-0.247	-1.31e-08	0.423	0.245	-0.357	0.635	0.795
140838	HDHD4 || haloacid dehalogenase-like hydrolase domain containing 4 (1)	-0.09	2.21e-08	1.46	0	-0.08	0.427	-0.455	0.0725	3.13e-09	0.0617	0.667
140846	C20orf120 || chromosome 20 open reading frame 120 (1)	0.035	-0.055	-0.035	0.075	-0.15	-0.333	0.55	-0.165	-0.6	-0.558	0.095
140890	SFRS12 || splicing factor, arginine/serine-rich 12 (2)	-0.1	-0.34	1.06	0.1	0.23	0.947	-0.41	0.79	0.77	-0.388	0.495
140901	STK35 || serine/threonine kinase 35 (1)	0.24	0.21	-0.25	-0.21	0.09	-0.133	-0.01	-0.48	1.34	-0.268	0.48
1415	CRYBB2 || crystallin, beta B2 (1)	0.405	0.385	-0.385	-0.455	0.16	0.347	-0.39	-0.0175	-4.02e-09	-0.938	0.0175
142	PARP1 || poly (ADP-ribose) polymerase family, member 1 (2)	-0.135	-0.085	0.085	0.195	-0.43	0.217	-0.05	0.642	-0.04	-0.798	-0.968
1421	CRYGD || crystallin, gamma D (1)	0.365	0.305	-0.305	-0.375	-0.421	-0.624	0.619	-0.065	0	-0.159	-0.675
142678	MIB2 || mindbomb homolog 2 (Drosophila) (1)	0.13	-0.08	0.08	-0.16	-0.02	-0.323	0.52	-0.443	2.22e-08	0.222	-1.12
142679	DUSP19 || dual specificity phosphatase 19 (2)	-0.14	-0.4	0.14	0.22	0.263	-4.17e-09	-0.357	0.325	0.303	0.355	0.388
1431	CS || citrate synthase (3)	-0.307	-0.057	0.057	0.107	-0.28	0.062	-0.467	0.009	0.34	-0.602	-0.009
143158	na || similar to centaurin, gamma-like family, member 1; ARF GTPase-activating protein; Em:AC012044.1 (1)	-0.025	0.055	0.025	-0.615	0.25	-0.033	1.03	-0.44	-0.15	-0.318	-0.63
1432	MAPK14 || mitogen-activated protein kinase 14 (3)	-0.873	-0.33	0.33	0.49	-0.033	0.116	2.91e-08	-0.448	1.96	0.914	1.07
143243	na || similar to Eukaryotic translation initiation factor 5A (eIF-5A) (eIF-4D) (Rev-binding factor) (1)	0.185	0.725	-0.195	-0.185	-1.05	-0.415	0.478	-3.46e-08	-0.492	1.49e-08	-1.36
143379	C10orf82 || chromosome 10 open reading frame 82 (1)	-0.12	-0.11	0.24	0.11	-0.07	0.377	-0.51	-0.24	-0.48	0.122	-0.76
143384	C10orf46 || chromosome 10 open reading frame 46 (2)	-0.122	-0.0375	0.0375	1.04	-1.1e-08	-0.048	-0.37	-0.118	0.96	0.207	0.462
1434	CSE1L || CSE1 chromosome segregation 1-like (yeast) (15)	-0.655	-0.468	0.468	0.748	-0.213	0.777	-0.03	0.462	1.18	1.5	0.997
143458	LOC143458 || hypothetical protein LOC143458 (1)	-0.095	-0.485	0.175	0.095	0.09	-0.003	-0.29	0.23	-0.1	-0.868	-0.23
143879	KBTBD3 || kelch repeat and BTB (POZ) domain containing 3 (1)	-0.065	-0.145	0.065	0.295	-0.00583	0.761	0.0942	0.215	-0.676	0.00583	0.445
143888	KDELC2 || KDEL (Lys-Asp-Glu-Leu) containing 2 (2)	-0.45	0.45	-0.57	0.83	0.0184	0.31	-0.402	0.603	0.328	-8.94e-09	0.502
143903	LOC143903 || layilin (1)	-0.335	-0.205	0.235	0.205	0.0465	-0.0465	-0.373	-0.458	0.626	-0.282	0.122
144097	LOC144097 || hypothetical protein BC007540 (1)	0.26	0.4	-0.26	-0.69	-0.64	-1.06	0.87	-0.055	-0.24	0.732	-1.72
144108	FLJ39441 || hypothetical protein FLJ39441 (1)	0.08	-4.1e-09	-0.07	0	0.208	0.525	-0.282	0.15	1.2	-4.17e-09	1.41
144110	FLJ90119 || hypothetical protein FLJ90119 (1)	0.06	-0.1	0.44	-0.06	0.025	-0.308	0.215	-1.03	1.12	1.33	0.762
1442	CSH1 || chorionic somatomammotropin hormone 1 (placental lactogen) (2)	0.1	-0.1	0.21	-0.21	-0.26	-0.303	1.67e-08	-0.96	0.33	1.26	0.31
144203	OVOS2 || ovostatin 2 (2)	0.1	-0.05	0.05	-0.18	0.578	0.885	0.463	0.305	-0.342	-1.49e-10	-0.235
144233	LOC144233 || hypothetical protein LOC144233 (1)	0.115	-0.105	0.085	-0.085	0.42	0.587	-0.04	-0.023	0.38	-0.0683	0.417
144363	LOC144363 || hypothetical protein LOC144363 (2)	-0.0425	0.0425	-0.672	0.938	0.76	0.687	-0.775	0.912	1.74e-08	0.632	0.527
144438	LOC144438 || hypothetical protein LOC144438 (1)	0.01	-0.49	0.2	-0.01	0.36	-0.043	0.26	0.027	1.5e-08	-0.118	-0.113
144455	E2F7 || E2F transcription factor 7 (1)	-0.245	-0.305	0.245	0.445	0.333	-5.96e-09	0.443	0.48	-0.107	-0.00535	0.08
1445	CSK || c-src tyrosine kinase (1)	0.215	0.585	-0.215	-1.49	-1.05	-1.05	0.435	0.05	0.285	0.337	-0.05
144581	RPL14L || ribosomal protein L14-like (1)	0.185	0.575	-0.595	-0.185	0.89	0.807	-1.6	0.325	-0.36	-0.438	-0.325
144638	FAM10A3 || family with sequence similarity 10, member A3 (1)	-0.03	-0.21	0.03	0.9	0.14	0.417	-1.79e-09	0.445	-0.11	-0.888	-0.245
144871	LOC144871 || hypothetical protein LOC144871 (1)	0.345	-0.025	-0.395	0.025	0.364	-0.239	-0.396	-0.125	0.494	-0.0842	0.125
145165	FAM10A4 || family with sequence similarity 10, member A4 (2)	0.01	-0.01	-0.82	0.3	0.765	0.507	-1.39	0.273	-0.135	-0.648	-0.228
1452	CSNK1A1 || casein kinase 1, alpha 1 (5)	-0.0855	-0.0125	0.0125	0.774	0.105	0.279	-0.26	-0.032	-0.368	-0.556	0.032
145258	GSC || goosecoid (1)	0.245	0.355	-0.245	-0.885	0.07	-0.283	0.28	-0.25	1.49e-09	-0.268	-0.12
1453	CSNK1D || casein kinase 1, delta (3)	-0.105	0.245	0.105	-0.145	0.031	-0.042	0.118	-0.14	-0.892	-0.277	-0.377
145389	SLC38A6 || solute carrier family 38, member 6 (2)	0.065	-0.175	0.835	-0.065	2.24e-08	0.007	0.155	0.285	-0.465	0.387	0.56
1454	CSNK1E || casein kinase 1, epsilon (2)	0.203	0.193	-0.193	-0.512	-0.27	-0.613	0.67	-1.04	-0.17	0.352	0.105
145553	MGC5987 || hypothetical protein MGC5987 (1)	0.495	0.385	-0.385	-0.425	-0.12	0.337	-0.12	0.46	0.64	0.972	1.68
145567	TTC7B || tetratricopeptide repeat domain 7B (1)	0.145	0.095	-0.215	-0.095	-0.25	0.007	-0.63	-0.215	0.69	-0.318	-0.085
1456	CSNK1G3 || casein kinase 1, gamma 3 (2)	-0.647	-0.422	0.422	0.593	0.255	0.037	-0.11	0.182	0.08	-0.658	0.236
1457	CSNK2A1 || casein kinase 2, alpha 1 polypeptide (1)	-0.105	-0.275	0.195	0.105	0.05	0.147	0.37	-0.44	0.15	-0.478	0.415
145748	FLJ33008 || hypothetical protein FLJ33008 (2)	-0.045	-0.235	0.045	1.19	-0.05	-0.273	0.78	-0.04	0.11	0.0817	0.04
145758	LOC145758 || hypothetical protein LOC145758 (1)	-0.015	-0.305	0.015	0.475	0.383	1.55e-08	0.253	-0.158	-0.007	-0.315	-0.078
145786	LOC145786 || hypothetical protein LOC145786 (1)	-0.005	-0.265	0.005	0.585	-0.0216	0.285	-0.152	0.325	1.17	1.79e-09	0.595
145815	MGC18216 || hypothetical protein MGC18216 (1)	0.15	-0.15	-0.3	0.42	0.67	0.357	-0.34	0.715	-1.18	-0.928	-0.125
1459	CSNK2A2 || casein kinase 2, alpha prime polypeptide (15)	-0.339	-0.45	0.339	0.801	0.12	0.551	-0.0237	-0.039	0.251	1.04e-08	-0.227
1460	CSNK2B || casein kinase 2, beta polypeptide (1)	0.24	-1.84e-08	-1.76e-08	0	-0.322	-0.0246	-0.162	-1.07e-08	-0.192	5.96e-10	-0.1
146198	ZFP90 || zinc finger protein 90 homolog (mouse) (2)	-0.28	-0.38	0.28	0.825	0.2	-0.003	-0.23	0.593	0.89	-0.188	0.562
146206	RLTPR || RGD, leucine-rich repeat, tropomodulin and proline-rich containing protein (1)	0.025	-0.025	0.025	-0.855	-0.285	-0.768	0.975	-0.035	-0.265	0.357	-1.39
146223	CKLFSF4 || chemokine-like factor super family 4 (3)	0.0517	-0.0517	-0.162	0.8	-0.652	-0.53	-0.147	-0.922	0.166	0.188	-0.106
146517	LOC146517 || hypothetical protein LOC146517 (1)	0.265	-0.175	0.025	-0.025	0.32	-0.213	-0.3	-0.563	0.15	-0.658	-0.263
146542	ZNF688 || zinc finger protein 688 (1)	-0.03	0.16	0.03	-0.92	-8.94e-10	-0.423	0.62	-0.393	0.32	1.38	0.627
1466	CSRP2 || cysteine and glycine-rich protein 2 (2)	0.32	0.385	-0.43	-0.32	-0.317	0	-0.027	0.125	-0.822	0.23	-0.495
146691	TOM1L2 || target of myb1-like 2 (chicken) (1)	0.355	0.285	-0.285	-0.585	0.325	-0.168	0.05	0.072	-0.115	-0.793	-2.25
146712	LOC146712 || hypothetical protein LOC146712 (2)	-0.05	-0.01	0.01	0.05	-0.133	-0.226	0.868	-0.245	0.0375	0.619	-0.015
146923	RUNDC1 || RUN domain containing 1 (1)	-0.01	0.01	-0.27	0.04	0.01	-0.233	0.23	0.1	-0.49	-0.418	-0.1
147007	C17orf32 || chromosome 17 open reading frame 32 (1)	-0.16	-0.08	0.29	0.08	0.15	-0.123	-0.83	-0.065	0.85	0.182	1.41
147015	MGC23280 || hypothetical protein MGC23280 (1)	-0.505	0.075	-0.075	0.095	3.28e-09	-0.183	1.02	0.02	-0.48	0.272	-0.22
1471	CST3 || cystatin C (amyloid angiopathy and cerebral hemorrhage) (1)	0.425	0.365	-0.365	-0.585	-0.4	0.997	-0.085	-0.412	1.92	1.05	0.333
147166	na || similar to tripartite motif-containing 16; estrogen-responsive B box protein (1)	-0.085	0.295	-0.255	0.085	0.05	-0.113	0.06	0.177	0.35	-0.188	0.537
147172	DKFZp667M2411 || hypothetical protein DKFZp667M2411 (2)	-0.02	0.02	-0.28	0.56	0.48	-0.058	-9.54e-09	-0.625	1.38	0.107	0.754
147184	MGC21518 || hypothetical protein MGC21518 (1)	0.165	0.135	-0.285	-0.135	-0.682	0.125	0.608	-0.218	-0.692	2.2e-08	-0.018
1476	CSTB || cystatin B (stefin B) (1)	2.34e-08	0.1	-0.64	0	-0.352	0.285	0.278	0.085	-0.522	2.98e-09	-0.085
147650	LOC147650 || hypothetical protein LOC147650 (1)	-0.045	0.045	0.095	-1.25	0.14	0.247	0.84	0.63	0	-0.488	-0.03
147699	FLJ40125 || hypothetical protein FLJ40125 (1)	0.675	0.505	-0.505	-0.525	0.36	-0.163	-0.32	-0.273	-2.31e-08	-0.778	-0.473
1477	CSTF1 || cleavage stimulation factor, 3' pre-RNA, subunit 1, 50kDa (2)	0.06	-0.14	0.17	-0.06	-0.76	-0.533	-0.08	-0.753	0.79	0.832	0.857
147727	LOC147727 || hypothetical protein LOC147727 (2)	0.33	0.3	-0.64	-0.3	-1.01	-0.233	0.19	-0.71	1.5e-08	0.232	0.55
1478	CSTF2 || cleavage stimulation factor, 3' pre-RNA, subunit 2, 64kDa (1)	0.27	-0.07	-0.44	0.07	0.598	-0.135	-0.0617	-0.805	-0.342	-4.47e-08	0.0495
147808	LOC147808 || similar to zinc finger protein (1)	0.355	0.485	-0.355	-0.625	0.015	-0.808	-0.245	-1.36	1.75	0.927	0.305
147841	SPBC24 || spindle pole body component 24 homolog (S. cerevisiae) (1)	-0.22	0.02	0.02	-0.02	-0.18	-0.173	0.38	0.227	-0.65	-0.768	-0.863
1479	CSTF3 || cleavage stimulation factor, 3' pre-RNA, subunit 3, 77kDa (1)	-0.155	-0.205	0.175	0.155	6.56e-09	-0.033	-0.67	0.25	2.2	0.552	2.1
147965	LOC147965 || hypothetical protein LOC147965 (1)	1.86e-08	0.02	-0.15	0	-0.662	-0.445	0.448	0.112	-1.02	-1.37e-08	-1.26
148022	TRIF || TIR domain containing adaptor inducing interferon-beta (3)	0.01	-0.01	0.67	-0.3	-2.68e-09	-0.633	0.79	-0.497	-0.295	0.125	0.0235
148113	CILP2 || cartilage intermediate layer protein 2 (1)	-0.03	0.03	0.15	-0.11	-0.446	-1.05	0.464	-0.23	0.604	0.346	-0.69
148131	KRTDAP || keratinocyte differentiation-associated protein (1)	0.03	-0.03	0.14	-0.51	-0.21	0.457	0.15	0.655	0	0.682	0.105
148189	LOC148189 || hypothetical protein LOC148189 (2)	-0.13	-0.04	0.04	1.08	0.297	0.434	-0.066	0.0035	-0.318	-0.0563	0.337
148203	LOC148203 || hypothetical protein LOC148203 (1)	0.455	0.145	-0.145	-0.175	-0.007	-7.15e-09	0.393	0.205	0.433	0.0746	0.905
148206	LOC148206 || hypothetical protein LOC148206 (2)	0.06	0.35	-0.425	-0.06	-3.87e-09	0.027	-0.58	0.113	0.565	-0.308	0.403
148223	C19orf25 || chromosome 19 open reading frame 25 (1)	0.15	0.11	-0.11	-1.16	-0.251	-0.944	0.959	-0.195	-0.371	0.251	-1.49
148252	DIRAS1 || DIRAS family, GTP-binding RAS-like 1 (1)	0.22	0.05	-0.05	-0.93	-0.42	-0.743	-2.15e-08	-0.61	0.48	-0.328	-0.56
148254	ZNF555 || zinc finger protein 555 (2)	-0.09	-0.19	0.09	0.24	0.293	0.4	-0.637	0.02	0.278	-1.61e-08	0.16
148304	C1orf74 || chromosome 1 open reading frame 74 (1)	0.565	0.255	-0.275	-0.255	0.188	-0.215	-0.412	-0.133	-0.342	-2.98e-09	0.507
148398	SAMD11 || sterile alpha motif domain containing 11 (1)	-0.15	0.15	0.29	-0.86	0.158	-0.315	0.883	-0.312	-0.542	-1.25e-08	-1.15
148413	LOC148413 || hypothetical protein LOC148413 (2)	0.25	0.52	-0.41	-0.25	0.118	-0.0646	0.193	-0.243	-0.942	-1.13e-08	0.197
148423	C1orf52 || chromosome 1 open reading frame 52 (2)	-0.212	-0.297	0.212	0.552	-0.08	0.087	-0.315	-0.247	0.66	-0.00835	0.787
1487	CTBP1 || C-terminal binding protein 1 (1)	0.22	0.68	-0.22	-0.56	-0.0216	-0.415	0.348	0.152	0.288	7.45e-11	-0.238
1488	CTBP2 || C-terminal binding protein 2 (4)	-0.9	-0.33	0.33	1.3	0.014	0.126	-2.34e-08	-0.0645	-0.295	-0.154	0.539
148867	SLC30A7 || solute carrier family 30 (zinc transporter), member 7 (2)	-0.065	-0.03	0.03	0.38	1.79e-09	-0.168	-0.515	0.0575	0.995	0.182	0.988
148898	LOC148898 || hypothetical protein BC007899 (1)	-0.05	5.31e-08	0.28	0	-0.1	0.067	0.24	0.145	-0.99	0.452	-0.145
149013	KIAA1245 || chomosome one amplified sequence 1 cyclophilin (1)	0.295	1.01	-0.605	-0.295	0.073	-1.08e-07	-0.757	0.555	1.82	-1.22	1.35
149076	FLJ25476 || FLJ25476 protein (1)	-0.04	0.04	0.52	-0.27	-2.77e-08	-0.623	-2.62e-08	-0.495	0.02	-0.568	0.075
1491	CTH || cystathionase (cystathionine gamma-lyase) (2)	-0.04	-0.04	0.04	0.26	-0.14	0.347	3.58e-08	0.0445	-0.55	0.292	0.0495
149224	na || similar to 40S ribosomal protein S7 (S8) (1)	1.19e-09	-0.25	0.1	2.98e-10	0.353	3.58e-09	-1.34	0.177	-1.21	-0.765	-0.543
149420	PDIK1L || PDLIM1 interacting kinase 1 like (1)	0.08	-1.24e-08	-0.32	-1.45e-08	0.344	0.391	-0.766	0.35	0	0.0258	0.94
149448	LOC149448 || hypothetical protein LOC149448 (2)	0.005	0.025	-0.765	-0.005	0.67	0.067	-0.58	-0.08	0.09	-0.778	0.08
1495	CTNNA1 || catenin (cadherin-associated protein), alpha 1, 102kDa (1)	-9.98e-09	0.08	-0.28	0	0.29	0.397	-0.82	0.025	-0.52	-0.988	-0.025
149603	LOC149603 || hypothetical protein LOC149603 (1)	0.2	0.49	-0.2	-0.56	0.1	-0.483	-0.58	-0.148	0.79	1.18	0.287
1497	CTNS || cystinosis, nephropathic (1)	0.1	-0.06	0.06	-0.33	-1.15	-1.22	2.38e-09	-1.26	0.31	0.922	1.16
149775	SANG || GNAS1 antisense (2)	0.598	0.323	-0.323	-0.378	0.182	-0.446	0.197	-0.344	-0.723	-0.221	-0.079
149832	LOC149832 || hypothetical protein LOC149832 (1)	-0.02	-0.19	0.02	0.21	0.24	0.237	0.33	0.857	-1.09	-0.968	-0.893
149840	FLJ25067 || hypothetical protein FLJ25067 (1)	0.105	-0.105	0.135	-0.415	-0.247	2.5e-08	0.413	0.245	0.333	1.25	0.325
1499	CTNNB1 || catenin (cadherin-associated protein), beta 1, 88kDa (1)	-0.135	-0.155	0.285	0.135	5.66e-09	0.017	-0.36	-0.118	0.4	-0.508	-0.458
1500	CTNND1 || catenin (cadherin-associated protein), delta 1 (1)	0.375	0.315	-0.565	-0.315	-0.1	-0.938	-0.548	-0.333	1.1	0.947	0.189
150051	na || hypothetical LOC150051 (1)	0.005	0.175	-0.005	-0.815	0.23	-0.303	0.55	-0.035	0	0.272	-0.145
150094	SNF1LK || SNF1-like kinase (1)	2.58e-08	2.69e-08	0.44	0	-0.0085	0.0085	-0.888	0.817	-0.678	0.143	0.107
150223	LOC150223 || hypothetical protein LOC150223 (2)	-0.02	0.13	0.02	-0.75	-0.415	-0.163	1.45	-0.42	0.04	1.28	0.08
150274	HSC20 || J-type co-chaperone HSC20 (2)	0.325	0.325	-0.685	-0.325	1.08	0.822	-1.08	0.85	-0.05	-0.178	0.345
150275	FLJ33814 || hypothetical protein FLJ33814 (1)	0.045	-0.045	0.135	-0.265	0.48	0.217	-0.23	-0.02	0.19	-0.138	0.02
150290	DUSP18 || dual specificity phosphatase 18 (1)	0.135	-0.315	0.005	-0.005	0.11	-0.643	6.56e-09	-0.948	0.97	-0.0984	0.462
1503	CTPS || CTP synthase (2)	-0.895	-0.365	0.365	0.565	-1.58e-08	0.672	-0.01	0.554	-0.23	-0.903	-0.596
150383	LOC150383 || similar to RIKEN cDNA 2210021J22 (2)	0.343	0.113	-0.113	-0.968	-0.253	-0.29	0.787	-0.042	0.307	0.714	0.042
150465	TTL || tubulin tyrosine ligase (2)	-0.335	-0.235	0.235	1.01	-2.68e-09	0.317	-0.04	-0.105	1.48	0.112	0.649
150472	CBWD2 || COBW domain containing 2 (4)	-0.319	-0.208	0.431	0.208	0.545	0.639	-0.535	0.639	-0.428	-0.53	0.474
150519	FLJ30428 || similar to hypothetical protein A230046P18; cDNA sequence BC055759 (1)	-0.01	1.5e-08	0.51	0	0.35	0.497	-0.12	-0.045	-0.9	-0.348	0.045
150590	C2orf15 || chromosome 2 open reading frame 15 (1)	-0.335	-0.175	0.175	0.175	2.95e-08	0.317	-1.11	0.23	1.81	0.952	2.31
150684	COMMD1 || copper metabolism (Murr1) domain containing 1 (2)	0.177	0.0475	-0.0475	-0.122	0.16	0.312	-1.43e-08	-0.03	-0.595	-0.623	0.145
150771	KIAA1754L || KIAA1754-like (1)	0.02	-0.17	0.02	-0.02	-0.06	-0.273	1.91e-08	-0.835	1.21	0.212	-0.045
150776	FLJ41352 || FLJ41352 protein (1)	-0.015	0.015	0.245	-0.295	1.04e-08	-0.363	-0.08	0.357	0.51	0.472	0.017
1508	CTSB || cathepsin B (1)	0.06	-0.04	0.04	-0.37	0.3	0.197	-1.43e-08	0.032	-1.59e-08	-0.0184	-0.348
1509	CTSD || cathepsin D (lysosomal aspartyl protease) (11)	0.071	-0.071	0.274	-0.448	-0.638	-1.05e-08	0.904	-0.17	-0.458	1.78	-1.56
151146	LOC151146 || hypothetical protein LOC151146 (1)	0.35	0.09	-0.83	-0.09	0.385	-0.538	0.445	-0.533	-0.075	-0.353	-0.443
151162	LOC151162 || hypothetical protein LOC151162 (2)	-0.125	-0.445	0.41	0.125	0.31	-0.418	0.325	-0.568	6.11e-09	-0.473	0.568
151176	FLJ37034 || hypothetical protein FLJ37034 (1)	-0.07	0.08	0.07	-1	-8.64e-09	-0.753	0.89	-0.875	-0.49	1.14	0.235
151195	FLJ40432 || hypothetical protein FLJ40432 (1)	-0.755	-0.525	0.525	0.965	-1.82e-08	0.342	-0.015	-0.258	0.425	-0.0683	0.557
1512	CTSH || cathepsin H (1)	-9.98e-09	-0.14	0.15	0	-0.79	-0.403	-1.67e-08	-0.46	0.9	1.13	0.39
151230	KLHL23 || kelch-like 23 (Drosophila) (2)	0.075	-0.075	-0.195	1	-3.87e-09	-0.473	-0.715	0.072	0.54	-0.423	0.447
151246	SGOL2 || shugoshin-like 2 (S. pombe) (1)	-0.04	-0.27	0.19	0.04	0.59	0.317	-0.74	0.62	0.12	-0.368	0.4
151313	DKFZp434N062 || hypothetical protein DKFZp434N062 (2)	0.133	0.328	-0.388	-0.133	-0.4	-0.348	0.255	-0.172	-1.64e-09	0.217	0.172
1514	CTSL || cathepsin L (2)	0.075	-0.075	-0.175	0.175	0.25	0.267	0.23	-0.155	0.24	-0.168	1.09
1515	CTSL2 || cathepsin L2 (1)	-0.365	0.905	-0.635	0.365	0.44	0.527	-1.38	0.6	-0.16	-0.808	0.7
151507	na || similar to male-specific lethal 3-like 1 isoform a; drosophila MSL3-like 1 (1)	-0.125	-0.115	0.115	0.215	-0.169	0.0985	-0.0985	-0.238	1.21	1.16	1.67
151525	WDSUB1 || WD repeat, SAM and U-box domain containing 1 (1)	-0.165	-0.095	0.355	0.095	0.323	-1.79e-08	-0.677	-0.093	0.303	-0.555	0.287
151534	LOC151534 || hypothetical protein BC009264 (1)	0.165	0.395	-0.355	-0.165	-0.46	-0.773	0.16	-0.135	0	0.632	-1.54
151613	TTC14 || tetratricopeptide repeat domain 14 (2)	-0.04	-0.08	0.04	0.06	0.355	0.212	-2.86e-08	0.532	-0.215	-0.298	0.0425
151827	LRRC34 || leucine rich repeat containing 34 (1)	-0.76	-0.19	0.19	0.25	0.82	0.487	-0.3	-0.14	-1.64e-09	0.492	0.14
152002	C3orf21 || chromosome 3 open reading frame 21 (1)	0.15	0.35	-0.15	-0.23	0.603	-1.31e-08	-0.077	-0.405	0.013	-1.03	-0.645
152007	C9orf19 || chromosome 9 open reading frame 19 (1)	0.03	-0.03	0.23	-0.31	-0.3	-0.783	0.18	-0.36	0.06	0.0216	-0.69
152137	C3orf6 || chromosome 3 open reading frame 6 (1)	-0.11	-0.49	0.11	0.37	0.808	0.345	-0.402	0.66	0.168	2.98e-09	-0.18
152189	CKLFSF8 || chemokine-like factor super family 8 (1)	0.28	0.03	-0.03	-0.19	-0.05	-0.263	-0.77	-0.188	1.45	1.33	1.4
152217	LOC152217 || hypothetical protein BC007882 (2)	0.217	0.228	-0.217	-0.927	0.005	-0.183	0.08	-0.66	-0.495	-0.223	0.349
1523	CUTL1 || cut-like 1, CCAAT displacement protein (Drosophila) (3)	0.0525	-0.0525	-0.887	0.545	0.08	-0.553	0.277	-0.0225	0.76	-0.348	-1.42
152302	CICE || cell death-inducing CIDE-like effector pseudogene (1)	0.235	0.305	-0.235	-0.425	-0.13	0.187	0.01	0.105	-0.44	-0.328	-0.265
152485	LOC152485 || hypothetical protein LOC152485 (1)	0.035	-0.035	-0.785	0.095	-0.2	-0.613	0.12	0.06	0	-0.228	-0.93
1525	CXADR || coxsackie virus and adenovirus receptor (1)	-0.18	-0.39	0.18	1.17	-0.397	-5.36e-09	-0.747	0.16	1.26	0.895	1.65
152518	NFXL1 || nuclear transcription factor, X-box binding-like 1 (1)	-0.28	4.36e-08	0.46	0	0.258	0.305	-0.482	0.365	0.108	1.19e-09	0.235
152559	PAQR3 || progestin and adipoQ receptor family member III (1)	-4.62e-09	0.04	-0.24	-5.51e-09	0.363	-1.07e-08	-0.387	0.212	2.13	1.65	2.17
152815	THAP6 || THAP domain containing 6 (1)	-0.635	-0.425	0.425	0.625	0.543	-1.19e-09	-0.387	-0.115	0.093	-0.805	0.895
152926	PPM1K || protein phosphatase 1K (PP2C domain containing) (2)	-0.16	-0.02	0.02	1.07	-0.095	0.242	-0.125	0.035	0.285	-0.413	0.995
153090	DAB2IP || DAB2 interacting protein (2)	0.545	0.215	-0.215	-1.4	0.285	-0.0529	0.265	-0.225	-0.21	-1.62e-09	-0.955
153129	FLJ90709 || hypothetical protein FLJ90709 (1)	0.18	-0.02	0.02	-0.13	0.02	0.357	-0.64	0.575	-0.71	-0.708	0.285
153222	LOC153222 || adult retina protein (2)	-0.175	-1.81	0.175	0.505	-0.677	4.89e-08	-0.442	0.102	1.31	1.76	1.56
153241	FLJ36090 || hypothetical protein FLJ36090 (1)	0.2	-0.17	8.64e-09	0	0.355	0.272	-0.615	0.605	-0.305	-0.263	0.075
153339	MGC23909 || hypothetical protein MGC23909 (2)	-0.0075	0.0075	0.372	-0.0375	0.618	0.345	-0.302	0.58	-0.227	3.73e-11	0.125
153396	MGC33214 || hypothetical protein MGC33214 (3)	-0.2	-0.07	0.166	0.07	0.243	1.07e-08	0.086	0.421	-0.727	-0.529	0.211
1535	CYBA || cytochrome b-245, alpha polypeptide (2)	0.18	0.285	-0.18	-1.21	-0.055	-0.078	1.19	-0.381	-0.345	0.557	-0.257
153527	ZMAT2 || zinc finger, matrin type 2 (1)	-0.045	0.045	-0.945	0.095	1.49e-09	-0.013	-0.24	0.265	0.03	-0.338	0.305
153642	DKFZp313G1735 || hypothetical protein DKFZp313G1735 (1)	-0.15	-0.4	0.24	0.15	0.06	0.017	-7.15e-09	-0.913	-0.06	-0.298	0.387
153830	FLJ31951 || hypothetical protein FLJ31951 (1)	0.05	0.03	-0.08	-0.03	0.31	0.047	-1.24	0.365	-5.21e-09	-1.29	-0.225
153914	LOC153914 || hypothetical protein LOC153914 (1)	-0.15	-0.38	0.15	0.34	-2.98e-10	0.017	-0.92	-0.323	0.5	-1.02	0.407
1540	CYLD || cylindromatosis (turban tumor syndrome) (1)	-0.235	-0.245	0.235	0.715	1.16	-1.1	-0.667	0.644	0	-5.96e-10	0.45
154007	C6orf151 || chromosome 6 open reading frame 151 (1)	-0.125	-0.475	0.185	0.125	-0.02	0.247	0.03	0.602	-0.48	-0.528	0.142
154064	RAET1L || retinoic acid early transcript 1L (2)	-0.215	-0.2	0.41	0.2	-0.235	0.217	4.05e-08	-0.055	0.24	0.552	0.04
154467	C6orf129 || chromosome 6 open reading frame 129 (3)	0.844	0.663	-0.663	-0.933	-0.713	-1.31e-09	-0.363	-0.0345	1.12	1.41	1.19
154661	RPIB9 || Rap2-binding protein 9 (2)	-0.23	-0.465	0.23	0.94	0.258	-0.0396	0.0534	-0.415	0.858	-8.94e-09	0.644
154743	FLJ31818 || hypothetical protein FLJ31818 (1)	-0.28	-0.48	0.48	0.28	-0.143	0.143	-0.363	0.75	0	0.228	0.33
154791	HSPC268 || hypothetical protein HSPC268 (1)	0.665	0.675	-0.665	-1.3	0.37	0.297	-1.03	0.56	-0.36	-1.48	-0.03
154807	VKORC1L1 || vitamin K epoxide reductase complex, subunit 1-like 1 (2)	-0.73	0.37	-0.37	1.18	-0.115	0.627	-0.04	0.855	-1.12e-08	0.0717	0.58
155054	ZNF425 || zinc finger protein 425 (1)	-2.23e-09	-0.1	0.35	0	-0.297	5.96e-10	0.533	0.005	-0.667	0.755	-0.245
155061	FLJ31413 || hypothetical protein FLJ31413 (1)	-9.98e-09	-0.08	0.07	0	0.24	-0.333	-0.03	-0.353	-0.46	-0.238	0.147
155066	ATP6V0E2L || ATPase, H+ transporting V0 subunit E isoform 2-like (rat) (2)	0.233	0.362	-0.233	-1.04	0.053	2.98e-09	0.713	-0.23	-0.452	0.57	-0.755
155370	SBDSP || Shwachman-Bodian-Diamond syndrome pseudogene (1)	-0.39	-0.01	0.83	0.01	0.47	0.837	-0.46	0.605	0.5	0.212	2.29
155400	WBSCR20B || Williams-Beuren Syndrome critical region protein 20 copy B (2)	-0.15	0.17	0.15	-0.64	-0.33	0.302	1.41	0.0965	-0.615	1.23	-0.628
156	ADRBK1 || adrenergic, beta, receptor kinase 1 (1)	0.305	0.235	-0.235	-0.905	-1.25	-0.513	0.24	-0.005	-0.24	0.722	-1.08
157	ADRBK2 || adrenergic, beta, receptor kinase 2 (1)	0.295	0.245	-0.245	-0.505	0.15	0.787	-0.42	0.134	0.11	-0.838	0.571
157247	MGC27345 || hypothetical protein MGC27345 (1)	0.495	0.265	-0.265	-0.335	0.32	-0.183	0.96	-0.173	0.17	-0.358	-0.083
157285	DKFZp761P0423 || hypothetical protein DKFZp761P0423 (1)	0.22	-0.03	0.03	-0.3	0.16	-0.453	0.98	-0.205	-0.16	-0.248	-0.315
1573	CYP2J2 || cytochrome P450, family 2, subfamily J, polypeptide 2 (1)	-0.065	-0.145	0.285	0.065	0.236	0.0135	-0.513	-0.318	-0.0135	-0.342	0.052
157317	CYCSL1 || cytochrome c, somatic-like 1 (2)	-0.193	-0.0175	0.512	0.0175	0.39	0.627	-0.285	0.263	-4.02e-09	-0.543	0.307
157506	RDH10 || retinol dehydrogenase 10 (all-trans) (3)	-0.195	0.05	-0.05	0.537	0.108	3.73e-10	-0.38	0.203	0.643	0.725	2.09
157567	LOC157567 || hypothetical protein LOC157567 (2)	-0.65	-0.05	0.05	0.16	1.76e-08	-0.653	0.18	-0.005	-0.51	0.512	0.48
157638	NSE2 || breast cancer membrane protein 101 (1)	0.01	-0.25	0.01	-0.01	-0.194	0.0735	0.206	-0.065	0	-0.172	0.595
157697	LOC157697 || hypothetical protein LOC157697 (1)	0.02	0.06	-0.51	-0.02	0.863	-5.13e-08	-0.077	-0.045	0.053	-0.865	1.02
158067	C9orf98 || chromosome 9 open reading frame 98 (1)	0.21	-0.21	0.21	-0.33	-0.0685	0.0685	-0.308	-0.115	-0.379	0.153	-0.635
158104	na || similar to 40S ribosomal protein S10 (1)	0.385	0.535	-0.385	-1.09	-0.498	-0.0715	-0.118	0.525	0.561	1.21	1.3
158135	C9orf20 || chromosome 9 open reading frame 20 (1)	-0.07	0.16	0.07	-0.17	0.873	-2.27e-08	0.023	-0.255	0	-0.695	-0.645
158158	RASEF || RAS and EF hand domain containing (1)	1.86e-08	-0.61	0.11	0	-0.22	-0.103	-0.06	-0.113	1.14	0.522	1.67
158160	LOC158160 || hypothetical protein LOC158160 (2)	-0.383	-0.383	0.637	0.383	0.315	0.352	-0.23	-0.308	-0.11	-0.618	0.612
158293	C9orf10OS || chromosome 9 open reading frame 10 opposite strand (2)	-0.15	-0.07	0.315	0.07	0.31	-0.048	-5.96e-10	-0.225	-0.77	-0.303	0.225
158345	na || similar to ribosomal protein L4; 60S ribosomal protein L4; homologue of Xenopus ribosomal protein L1 (1)	0.35	0.26	-0.26	-0.91	0.36	0.797	-1.48	0.155	-0.12	-0.368	0.225
158427	C9orf97 || chromosome 9 open reading frame 97 (1)	-0.015	0.165	-0.645	0.015	0.93	0.297	-0.99	-0.005	0	0.502	0.005
158511	CSAG1 || chondrosarcoma associated gene 1 (1)	-0.09	0.09	0.11	-0.1	0.117	0.0035	-0.0035	0.082	0.0465	-0.0519	-0.368
158960	LOC158960 || hypothetical protein BC009467 (1)	1.34e-09	0.04	-0.79	0	-0.7	0.017	8.34e-09	0.07	-0.56	0.292	-0.07
159	ADSS || adenylosuccinate synthase (1)	-0.15	-0.11	0.11	0.47	-7.45e-09	0.137	-0.87	-0.155	0.57	-0.518	0.435
159090	LOC159090 || similar to hypothetical protein MGC17347 (1)	0.015	-0.015	-0.355	0.075	0.22	-0.413	-0.64	-0.295	0	1.33	2.67
159110	LOC159110 || hypothetical protein LOC159110 (1)	0.085	0.175	-0.465	-0.085	-0.897	1.55e-08	1.98	-0.06	-3.19	1.07	-0.03
159296	NKX2-3 || NK2 transcription factor related, locus 3 (Drosophila) (1)	0.85	0.73	-0.73	-0.91	0.1	-0.773	0.63	-0.145	-1.11	-0.678	-0.215
1594	CYP27B1 || cytochrome P450, family 27, subfamily B, polypeptide 1 (1)	-0.17	-0.5	0.56	0.17	-0.535	-0.338	0.675	-0.145	0.075	0.667	-0.235
1595	CYP51A1 || cytochrome P450, family 51, subfamily A, polypeptide 1 (1)	-0.49	-0.24	0.24	0.36	-0.347	-3.73e-10	-0.797	0.263	0.383	0.26	0.713
160	AP2A1 || adaptor-related protein complex 2, alpha 1 subunit (2)	0.27	0.275	-0.27	-0.605	-0.428	-0.586	0.992	-0.247	-0.348	-0.342	-1.25
1601	DAB2 || disabled homolog 2, mitogen-responsive phosphoprotein (Drosophila) (1)	-0.26	-0.22	0.22	0.46	2.09e-09	-0.543	0.27	-0.698	1.72	0.902	1.29
1602	DACH1 || dachshund homolog 1 (Drosophila) (4)	-0.79	0.41	-0.41	0.47	-2.53e-08	-0.018	-0.265	-0.269	0.353	-0.823	0.141
1604	DAF || decay accelerating factor for complement (CD55, Cromer blood group system) (1)	-0.185	-0.205	0.435	0.185	0.12	0.017	-0.7	-0.188	0.17	-0.0184	0.882
1605	DAG1 || dystroglycan 1 (dystrophin-associated glycoprotein 1) (1)	-0.09	-0.34	0.25	0.09	-5.07e-09	-0.933	-0.195	0.037	1.13	0.442	1.61
1606	DGKA || diacylglycerol kinase, alpha 80kDa (1)	-0.035	-0.165	0.045	0.035	0.198	-0.195	0.0583	-0.325	0.888	3.58e-09	-0.445
160760	TA-PP2C || T-cell activation protein phosphatase 2C (1)	-0.535	-0.205	0.205	1.12	0.05	0.027	-0.47	0.167	-6.41e-09	-0.878	0.807
1612	DAPK1 || death-associated protein kinase 1 (1)	0.08	-0.13	-0.08	0.08	0.26	-0.453	0.07	-0.228	-1.94e-09	-0.218	0.002
1613	DAPK3 || death-associated protein kinase 3 (2)	-0.005	0.415	0.005	-0.705	-1.34e-08	-0.323	0.755	-0.11	-1.35	0.282	-0.9
1615	DARS || aspartyl-tRNA synthetase (1)	-0.1	-0.11	0.1	0.91	0.47	0.707	-0.32	0.96	7.9e-09	-0.788	-2.98e-09
161527	LOC161527 || hypothetical protein LOC161527 (1)	0.11	2.93e-08	-0.15	0	1.01	-2.27e-08	-0.087	0.37	0.543	0.245	0.31
161742	SPRED1 || sprouty-related, EVH1 domain containing 1 (2)	-0.113	0.113	-0.237	0.542	-0.19	-0.533	-0.74	-0.225	0.15	0.252	0.985
161882	ZFPM1 || zinc finger protein, multitype 1 (1)	0.14	0.42	-0.14	-1.23	-0.426	-1.26	0.714	-0.665	-0.426	0.366	-1.34
1622	DBI || diazepam binding inhibitor (GABA receptor modulator, acyl-Coenzyme A binding protein) (2)	0.44	0.66	-0.44	-0.48	1.64e-09	0.142	-0.845	-1.19e-09	0.03	-0.968	0.08
162239	ZFP1 || zinc finger protein 1 homolog (mouse) (1)	0.01	0.04	-0.07	-0.01	0.0615	-0.0615	-0.139	0.055	-0.129	-0.587	-0.225
162427	LOC162427 || hypothetical protein LOC162427 (1)	-0.025	0.025	0.145	-0.175	5.81e-08	0.267	0.94	-0.88	-0.8	-1.07	-0.23
162835	na || similar to single stranded DNA binding protein 4 (1)	-0.25	0.42	0.25	-0.5	-0.91	-0.803	0.67	0.13	7.45e-10	1.23	-1.62
1629	DBT || dihydrolipoamide branched chain transacylase E2 (1)	-0.39	0.39	-1.19	0.61	0.348	0.155	-0.612	0.305	1.34	-6.56e-09	1.56
162972	ZNF550 || zinc finger protein 550 (1)	-0.015	-0.355	0.015	0.325	0.003	5.96e-09	-0.357	-0.353	0.013	1.35	1.12
162979	ZNF342 || zinc finger protein 342 (1)	0.025	0.155	-0.025	-0.525	-0.16	-0.493	0.125	0.14	3.13e-09	0.792	-0.14
162989	DEDD2 || death effector domain containing 2 (1)	-0.055	0.125	0.055	-0.495	-3.72e-08	-0.053	-0.39	-0.015	-0.82	-0.0384	-0.845
163	AP2B1 || adaptor-related protein complex 2, beta 1 subunit (2)	0.005	-0.03	-0.005	0.075	-0.13	-0.483	2.98e-09	-0.138	0.11	-0.00835	-0.573
163033	ZNF579 || zinc finger protein 579 (1)	0.225	0.135	-0.135	-0.815	-1.12	-1.62	0.73	-0.4	-3.74e-08	1.1	-0.33
163126	CRI2 || CREBBP/EP300 inhibitor 2 (1)	0.38	0.66	-0.71	-0.38	0.92	0.437	-0.96	0.02	-0.48	-1.31	0.12
163259	FLJ37099 || FLJ37099 protein (1)	0.12	-0.12	0.41	-0.12	0.737	0.124	-0.563	-0.01	0.107	0.0383	0.01
1633	DCK || deoxycytidine kinase (1)	-0.395	-0.335	0.535	0.335	-0.19	0.387	-0.06	0.53	0.01	0.552	0.59
1635	DCTD || dCMP deaminase (1)	0.025	-0.055	0.055	-0.025	-0.32	-0.563	-0.61	-0.493	1.47	0.662	1.28
163732	CITED4 || Cbp/p300-interacting transactivator, with Glu/Asp-rich carboxy-terminal domain, 4 (1)	0.375	0.025	-0.025	-0.775	-0.985	-1.09	0.085	-0.175	0.435	1.15	-0.995
163786	SAS-6 || spindle assembly abnormal protein 6 (1)	0.215	-0.045	-0.535	0.045	0.273	2.09e-09	-0.157	0.58	-0.267	0.0746	-0.06
163859	C1orf55 || chromosome 1 open reading frame 55 (2)	-0.3	0.3	-0.55	0.41	0.163	0.247	-0.565	0.0705	0.16	-0.148	0.423
163882	C1orf71 || chromosome 1 open reading frame 71 (2)	-0.045	-0.105	0.045	1.02	0.065	0.007	0.135	0.32	-0.215	-0.503	0.585
164	AP1G1 || adaptor-related protein complex 1, gamma 1 subunit (2)	-0.0375	-0.233	0.0375	0.287	0.24	0.197	-0.015	-0.138	0.795	-0.998	0.138
1643	DDB2 || damage-specific DNA binding protein 2, 48kDa (5)	-0.0805	-0.0885	0.258	0.0805	-0.324	0.517	0.25	0.234	-0.889	1.04e-08	-0.952
1647	GADD45A || growth arrest and DNA-damage-inducible, alpha (1)	-0.5	-2.32e-08	0.45	0	0.4	0.177	-1.95	0.217	6.71e-09	-1.06	0.747
1649	DDIT3 || DNA-damage-inducible transcript 3 (1)	0.455	0.405	-0.785	-0.405	1.04e-08	0.047	-0.42	0.272	-0.29	0.192	0.012
1652	DDT || D-dopachrome tautomerase (2)	0.43	0.205	-0.205	-0.58	-0.11	-0.013	1.19e-08	-0.453	-0.78	-0.573	-0.483
1653	DDX1 || DEAD (Asp-Glu-Ala-Asp) box polypeptide 1 (1)	-0.21	-0.19	0.29	0.19	0.84	0.857	-0.61	0.73	-2.07e-08	-1.32	0.18
165324	UBXD4 || UBX domain containing 4 (1)	-0.295	-0.115	0.165	0.115	0.77	0.477	-0.47	-0.553	0.26	-0.388	0.647
1657	DMXL1 || Dmx-like 1 (1)	0.265	-0.095	-0.195	0.095	0.35	0.417	-4.47e-10	0.95	-0.88	0.0416	0.11
1659	DHX8 || DEAH (Asp-Glu-Ala-His) box polypeptide 8 (1)	0.34	0.15	-0.15	-0.16	-0.027	5.96e-09	0.533	0.0345	0.283	-0.185	0.209
1660	DHX9 || DEAH (Asp-Glu-Ala-His) box polypeptide 9 (13)	-0.1	-0.26	0.1	1.07	0.088	0.462	-0.072	0.067	1.03e-08	-0.393	0.517
1662	DDX10 || DEAD (Asp-Glu-Ala-Asp) box polypeptide 10 (3)	0.705	-0.245	-0.085	0.085	0.24	0.207	-0.33	0.092	0.1	-0.958	0.742
1663	DDX11 || DEAD/H (Asp-Glu-Ala-Asp/His) box polypeptide 11 (CHL1-like helicase homolog, S. cerevisiae) (3)	0.127	0.0265	-0.0265	-0.203	0.194	-0.049	0.877	0.0186	-0.11	-0.0883	-0.671
1666	DECR1 || 2,4-dienoyl CoA reductase 1, mitochondrial (2)	-0.52	-0.28	0.675	0.28	0.225	1.04	-0.215	0.235	5.43	2.64	4.26
166815	TIGD2 || tigger transposable element derived 2 (1)	2.82e-08	-0.15	0.35	0	0.005	0.202	-0.335	-0.02	-0.005	-0.0833	0.34
167127	LOC167127 || hypothetical protein LOC167127 (1)	0.245	-0.075	0.075	-0.135	-0.436	-0.999	-0.286	-0.165	0.384	0.286	0.055
167153	PAPD4 || PAP associated domain containing 4 (1)	0.2	2.46e-09	-0.1	0	2.98e-10	-0.443	-0.08	-0.405	0.99	0.512	1.61
167227	DCP2 || DCP2 decapping enzyme homolog (S. cerevisiae) (1)	-0.115	-0.315	0.115	0.205	0.41	0.217	0.03	1.01	-0.4	-0.288	-0.025
1675	DF || D component of complement (adipsin) (1)	0.59	0.16	-0.16	-0.98	-0.097	-1.31e-08	1.08	0.01	-0.637	0.205	-0.01
1676	DFFA || DNA fragmentation factor, 45kDa, alpha polypeptide (2)	-0.03	0.03	-0.22	0.27	-2.53e-08	-0.038	-0.13	-0.178	1.06	-0.253	1.14
1678	TIMM8A || translocase of inner mitochondrial membrane 8 homolog A (yeast) (2)	0.177	0.0975	-0.128	-0.0975	0.0883	0.385	0.658	-0.406	-0.352	6.56e-09	0.2
168374	ZNF92 || zinc finger protein 92 (HTF12) (2)	0.075	-0.425	0.145	-0.075	0.193	0.125	-0.762	-0.163	0.493	-0.125	0.542
169200	DKFZp762C1112 || hypothetical protein DKFZp762C1112 (1)	-0.145	-0.475	0.425	0.145	-0.287	-1.31e-08	0.373	0.515	0.133	0.665	1.26
169714	QSCN6L1 || quiescin Q6-like 1 (1)	0.065	0.005	-0.005	-0.325	0.6	-0.073	0.49	-0.293	0.85	-0.278	-0.053
170394	PWWP2 || PWWP domain containing 2 (1)	0.015	0.015	-0.015	-0.895	4.47e-09	-0.073	0.63	-0.195	-0.63	-0.0784	-1.11
170463	SSBP4 || single stranded DNA binding protein 4 (4)	0.22	0.05	-0.05	-0.69	-2.38e-09	-0.328	1.1	-0.318	-0.202	1.1	-1.27
170506	DHX36 || DEAH (Asp-Glu-Ala-His) box polypeptide 36 (1)	-0.06	-0.02	0.02	0.62	0.28	0.067	1.31e-08	-0.21	0.1	-0.918	0.44
170622	COMMD6 || COMM domain containing 6 (2)	-0.203	0.0825	-0.0175	0.0175	-0.015	0.067	-1.25	-0.043	0.43	0.502	1.18
170685	NUDT10 || nudix (nucleoside diphosphate linked moiety X)-type motif 10 (1)	0.07	-0.02	-0.08	0.02	-0.384	-0.0465	-1.13	-0.673	0.936	0.528	1.04
170688	NUDT4P2 || nudix (nucleoside diphosphate linked moiety X)-type motif 4 pseudogene 2 (1)	-0.005	0.005	-0.135	0.005	0.326	-0.0873	-0.964	-0.34	0	0.0873	0.36
170850	KCNG3 || potassium voltage-gated channel, subfamily G, member 3 (1)	-0.14	-0.35	0.14	0.24	0.236	-0.167	-0.243	-0.193	0	0.288	0.577
170954	KIAA1949 || KIAA1949 (1)	0.31	0.11	-0.11	-0.63	-0.105	-0.208	0.635	0.077	0	0.537	-1.29
171017	ZNF384 || zinc finger protein 384 (5)	0.827	0.627	-0.993	-0.627	-0.707	0.45	1.91e-09	-0.14	-0.529	0.213	-0.96
171023	ASXL1 || additional sex combs like 1 (Drosophila) (2)	0.583	0.217	-0.217	-0.328	0.13	-0.173	0.375	0.215	0.095	0.132	-0.115
171220	LOC171220 || destrin-2 pseudogene (1)	-0.88	0.01	-0.01	0.36	0.11	0.217	-0.5	0.242	0	-0.748	-0.088
171546	C14orf147 || chromosome 14 open reading frame 147 (3)	-0.117	0.346	0.099	-0.099	0.42	0.772	-0.577	-0.062	1.98e-08	-0.508	0.062
171586	ABHD3 || abhydrolase domain containing 3 (1)	-0.09	-0.09	0.37	0.09	-5.16e-08	-0.183	-0.32	-0.068	1	0.452	1.39
1716	DGUOK || deoxyguanosine kinase (2)	-0.0425	0.282	0.0425	-0.203	0.057	0.449	7.63e-09	-0.12	-0.993	-0.311	0.12
1718	DHCR24 || 24-dehydrocholesterol reductase (1)	0.44	0.21	-0.31	-0.21	-0.0208	-0.334	-0.441	-0.623	0	0.0208	0.917
1719	DHFR || dihydrofolate reductase (2)	-0.265	-0.225	0.225	1.16	-0.23	1.24	0.727	0.31	-0.56	-0.538	-0.19
1723	DHODH || dihydroorotate dehydrogenase (1)	-0.23	0.23	0.25	-0.59	0.015	-0.068	0.47	-0.225	-1.21	-0.193	0.035
1725	DHPS || deoxyhypusine synthase (3)	0.0466	0.0267	-0.0267	-0.177	-0.377	-0.113	0.0463	-0.798	0.69	0.178	0.442
1728	NQO1 || NAD(P)H dehydrogenase, quinone 1 (2)	-0.14	0.14	-0.54	0.24	-0.1	0.267	-0.33	-0.0565	0	0.0617	-0.0665
1729	DIAPH1 || diaphanous homolog 1 (Drosophila) (2)	0.175	-0.265	-0.115	0.115	0.14	0.217	0.13	0.575	-4.47e-10	-0.153	-0.388
1734	DIO2 || deiodinase, iodothyronine, type II (1)	-0.06	0.06	0.11	-0.07	-0.0808	0.0762	0.929	0.115	0.249	-0.0292	-0.475
1737	DLAT || dihydrolipoamide S-acetyltransferase (E2 component of pyruvate dehydrogenase complex) (1)	-0.53	-0.27	0.27	0.81	0.285	0.359	-0.948	0.5	0.185	0.227	0.263
1738	DLD || dihydrolipoamide dehydrogenase (E3 component of pyruvate dehydrogenase complex, 2-oxo-glutarate complex, branched chain keto acid dehydrogenase complex) (2)	-0.105	-0.27	0.105	0.3	0.4	0.567	-1.49e-10	0.074	-0.42	-0.353	-0.074
1739	DLG1 || discs, large homolog 1 (Drosophila) (3)	-0.406	0.161	-0.161	1.14	0.141	0.288	-0.346	-0.0165	0.106	2.5e-09	0.346
1741	DLG3 || discs, large homolog 3 (neuroendocrine-dlg, Drosophila) (1)	-0.19	0.19	-0.49	0.34	0.38	0.387	-0.11	0.015	0	-0.848	-0.695
1742	DLG4 || discs, large homolog 4 (Drosophila) (1)	0.12	0.59	-0.12	-0.17	-0.345	-1.01	0.345	-0.175	0.215	-0.263	-0.505
1743	DLST || dihydrolipoamide S-succinyltransferase (E2 component of 2-oxo-glutarate complex) (1)	0.58	0.34	-0.34	-0.49	0.07	0.027	-0.53	-0.237	0.05	-0.858	-0.963
1745	DLX1 || distal-less homeo box 1 (1)	0.3	0.35	-0.45	-0.3	0.203	5.96e-09	-0.647	-0.018	1.91	-0.935	0.217
1746	DLX2 || distal-less homeo box 2 (1)	0.135	0.255	-0.135	-0.465	-0.71	-0.643	0.32	-0.375	1.74e-08	0.0817	-1.15
1749	DLX5 || distal-less homeo box 5 (1)	-0.05	0.18	0.05	-0.6	-0.739	0.148	-0.939	-0.195	0.211	-0.717	0.165
175	AGA || aspartylglucosaminidase (3)	-0.429	-0.365	0.365	0.558	0.23	0.647	-0.02	0.235	-0.288	0.576	0.675
1774	DNASE1L1 || deoxyribonuclease I-like 1 (2)	-0.01	0.01	0.15	-0.325	-0.14	-0.128	-9.54e-09	-0.583	0.14	0.312	-0.367
1777	DNASE2 || deoxyribonuclease II, lysosomal (1)	0.12	0.33	-0.12	-0.66	-0.0117	0.735	0.558	-0.06	0.288	-4.95e-08	0.06
178	AGL || amylo-1, 6-glucosidase, 4-alpha-glucanotransferase (glycogen debranching enzyme, glycogen storage disease type III) (2)	0.115	-0.14	-0.115	0.405	-0.1	-0.008	0.025	0.225	-3.13e-09	0.282	0.0982
1781	DNCI2 || dynein, cytoplasmic, intermediate polypeptide 2 (2)	0.02	-0.045	-0.02	0.455	4.47e-10	0.457	-0.235	0.211	-0.575	-0.588	0.0515
1785	DNM2 || dynamin 2 (2)	1.02	-0.145	0.145	-1.13	-0.34	-1.24	0.775	-4.89e-08	-7e-09	0.902	-0.08
1787	DNMT2 || DNA (cytosine-5-)-methyltransferase 2 (2)	-0.405	-0.305	0.785	0.305	0.376	-6.44e-09	-0.549	0.07	-0.534	-0.0123	-0.07
1788	DNMT3A || DNA (cytosine-5-)-methyltransferase 3 alpha (1)	0.04	-0.36	0.32	-0.04	0.58	-0.033	0.115	-0.294	-7.45e-10	-0.468	-0.174
1793	DOCK1 || dedicator of cytokinesis 1 (1)	0.155	-0.055	-0.445	0.055	0.783	-3.22e-08	0.143	0.222	-0.057	-0.985	-0.478
1796	DOK1 || docking protein 1, 62kDa (downstream of tyrosine kinase 1) (3)	0.28	0.77	-0.28	-1.39	-0.01	-0.323	1.33	0.105	-0.41	0.907	-0.695
1797	DOM3Z || dom-3 homolog Z (C. elegans) (3)	0.01	-0.01	0.15	-0.253	-0.493	-0.5	0.38	-0.545	0.63	1.39	-0.145
1798	DPAGT1 || dolichyl-phosphate (UDP-N-acetylglucosamine) N-acetylglucosaminephosphotransferase 1 (GlcNAc-1-P transferase) (2)	0.015	-0.015	0.26	-0.145	-0.295	0.077	0.555	-0.76	3.13e-09	0.827	0.654
1802	DPH2L2 || DPH2-like 2 (S. cerevisiae) (2)	0.02	0.015	-0.015	-0.375	-0.485	-0.168	0.85	-0.725	0.395	1.35	-0.37
1808	DPYSL2 || dihydropyrimidinase-like 2 (1)	0.065	-0.065	-0.535	0.405	2.71e-08	-0.033	-0.5	-0.17	0.96	-0.178	-0.165
1810	DR1 || down-regulator of transcription 1, TBP-binding (negative cofactor 2) (1)	-0.465	-0.385	0.385	0.385	0.19	0.107	-0.07	0.398	1.74e-08	-0.118	0.578
1818	DRD5P2 || dopamine receptor D5 pseudogene 2 (1)	0.3	0.27	-0.27	-0.62	-0.06	0.157	0.25	0.115	-0.25	0.0817	-0.435
1822	ATN1 || atrophin 1 (1)	0.295	0.575	-0.295	-1.25	0.0742	-1.08	0.174	-0.085	0	-0.0742	-0.465
1824	DSC2 || desmocollin 2 (1)	0.045	-0.215	-0.045	0.225	0.52	0.057	-0.52	-0.075	0.35	-0.478	0.075
1829	DSG2 || desmoglein 2 (1)	-0.46	0.04	-0.04	1.53	-0.085	0.512	0.065	0.022	1.04	0.417	0.192
1831	TSC22D3 || TSC22 domain family 3 (2)	0.185	-0.745	0.15	-0.15	-0.547	0.042	-0.263	-0.731	-8.79e-09	1.02	0.646
1832	DSP || desmoplakin (1)	-0.09	0.01	-0.01	0.53	0.277	0.0335	0.246	0.567	0	-1.14	0.017
1836	SLC26A2 || solute carrier family 26 (sulfate transporter), member 2 (2)	-0.105	-0.205	0.105	0.275	0.37	-0.053	-0.32	-0.085	2.77	1.1	2.79
1837	DTNA || dystrobrevin, alpha (4)	-0.01	-0.17	0.22	0.01	-0.202	-0.093	-0.107	-0.914	1.2	1.28	0.694
1838	DTNB || dystrobrevin, beta (2)	0.41	0.3	-0.44	-0.3	-0.3	-0.753	-1.19e-08	-1.06	1.28	0.117	0.273
1839	HBEGF || heparin-binding EGF-like growth factor (1)	0.015	-0.105	0.195	-0.015	0.39	0.007	-0.08	-0.743	0.62	0.432	0.457
1841	DTYMK || deoxythymidylate kinase (thymidylate kinase) (2)	0.198	0.278	-0.198	-0.583	-0.51	0.097	0.41	-0.41	-0.495	0.367	0.75
1844	DUSP2 || dual specificity phosphatase 2 (1)	5.68e-08	5.79e-08	0.14	-0.5	-1.03	-0.753	0.17	-0.545	-1.2	0.132	-1.12
1845	DUSP3 || dual specificity phosphatase 3 (vaccinia virus phosphatase VH1-related) (2)	-0.468	-0.263	0.497	0.263	-0.14	0.327	0.295	-0.125	0.375	0.462	0.015
1850	DUSP8 || dual specificity phosphatase 8 (2)	-0.025	0.025	0.975	-0.265	0.14	-0.338	0.81	-1.1	-0.19	1.85	0.38
1852	DUSP9 || dual specificity phosphatase 9 (1)	-0.19	0.21	0.19	-1.23	-0.28	-0.843	1.52	-0.908	1.3	2.28	0.902
1856	DVL2 || dishevelled, dsh homolog 2 (Drosophila) (2)	1.21	0.45	-0.45	-0.55	-0.33	-0.723	0.01	-0.125	0.68	0.132	-0.205
1857	DVL3 || dishevelled, dsh homolog 3 (Drosophila) (2)	0.245	0.245	-0.245	-0.485	-0.115	-0.373	0.165	-0.323	-2.83e-09	-0.348	-0.932
1859	DYRK1A || dual-specificity tyrosine-(Y)-phosphorylation regulated kinase 1A (1)	0.255	0.025	-0.115	-0.025	0.29	0.107	0.14	-0.075	1.98e-08	-0.0984	0.075
1869	E2F1 || E2F transcription factor 1 (1)	-0.29	0.48	0.29	-0.82	-0.66	-0.283	1.16	-0.04	-1.34	0.0517	-2.46
1870	E2F2 || E2F transcription factor 2 (1)	-2.67e-08	-0.38	0.19	0	5.66e-09	-0.213	0.19	-0.378	0.26	-0.598	0.322
1871	E2F3 || E2F transcription factor 3 (2)	0.0975	0.278	-0.297	-0.0975	0.323	1.55e-08	-0.627	-0.148	0.773	-0.7	0.672
1874	E2F4 || E2F transcription factor 4, p107/p130-binding (1)	-0.105	0.285	0.105	-0.105	-0.56	-0.143	0.38	-0.26	0.39	-0.0184	-0.46
1875	E2F5 || E2F transcription factor 5, p130-binding (1)	-0.29	-0.2	0.2	0.39	-0.981	-0.904	-0.841	0.135	1.48	0.841	-0.135
1876	E2F6 || E2F transcription factor 6 (2)	-0.27	0.025	-0.025	0.35	-0.927	0.087	-0.493	0.298	1.17	1.37	1.95
1894	ECT2 || epithelial cell transforming sequence 2 oncogene (1)	-0.185	-0.245	0.185	1.6	0.5	0.787	-0.42	0.635	1.49e-09	0.0817	0.255
1901	EDG1 || endothelial differentiation, sphingolipid G-protein-coupled receptor, 1 (1)	-0.155	-0.185	0.385	0.155	0.458	-0.175	-0.582	-0.03	0	1.73e-08	1.12
1902	EDG2 || endothelial differentiation, lysophosphatidic acid G-protein-coupled receptor, 2 (2)	-0.863	-0.323	0.323	1.18	0.075	0.082	-0.255	-0.17	0.855	0.457	1.4
191	AHCY || S-adenosylhomocysteine hydrolase (2)	0.0975	0.448	-0.0975	-0.398	-0.52	-0.403	-0.115	0.27	0.105	0.0117	-0.235
1911	PHC1 || polyhomeotic-like 1 (Drosophila) (2)	-0.0725	0.0725	-0.122	0.642	-0.31	-0.083	1.19e-09	-0.225	0.36	0.00165	-0.262
1912	PHC2 || polyhomeotic-like 2 (Drosophila) (11)	0.208	0.0115	-0.0115	-0.246	-0.138	-0.748	-2.34e-08	-0.51	0.792	0.434	-0.349
1915	EEF1A1 || eukaryotic translation elongation factor 1 alpha 1 (2)	0.0275	0.188	-0.0275	-0.0975	0.35	0.752	-2	0.54	-0.585	-0.188	-0.535
192111	MGC5352 || Bcl-XL-binding protein v68 (2)	-0.105	-5.89e-09	0.86	0	-0.557	0	0.713	0.0375	-1.31	0.5	-0.588
192137	C2orf12 || chromosome 2 open reading frame 12 (2)	-0.887	-0.627	0.627	2.22	-0.22	0.762	0.33	0.015	2.22	0.892	3.65
192683	SCAMP5 || secretory carrier membrane protein 5 (2)	0.255	0.075	-0.075	-0.285	-0.438	-0.271	0.403	-0.09	0.138	0.694	-0.39
1933	EEF1B2 || eukaryotic translation elongation factor 1 beta 2 (5)	-0.17	-0.05	0.27	0.05	0.89	1.52	-0.048	0.209	1.5e-08	-0.318	0.233
1935	EEF1B4 || eukaryotic translation elongation factor 1 beta 4 (1)	-0.07	0.32	-0.07	0.07	1.04	0.957	-0.56	0.585	-0.08	-0.768	0.185
1936	EEF1D || eukaryotic translation elongation factor 1 delta (guanine nucleotide exchange protein) (3)	0.305	0.582	-0.305	-1.04	-0.28	-1.24	0.81	-0.175	-0.76	-0.408	-0.775
1938	EEF2 || eukaryotic translation elongation factor 2 (14)	-0.804	-0.474	0.685	0.474	-0.77	0.354	0.484	-0.073	-1.08	0.119	-1.1
1939	LGTN || ligatin (1)	0.09	0.23	-0.09	-0.09	1.4e-08	-0.243	0.31	-0.123	-0.64	-0.468	-0.573
1942	EFNA1 || ephrin-A1 (1)	0.17	0.17	-0.17	-0.5	-0.097	-2.74e-08	0.283	0.027	0.403	1.05	0.767
1944	EFNA3 || ephrin-A3 (1)	0.065	0.435	-0.065	-0.415	-0.0258	-0.569	1	-0.35	-0.326	0.0258	0.17
1947	EFNB1 || ephrin-B1 (1)	0.54	0.21	-0.21	-1.1	-0.686	-1.14	0.00417	-0.175	0.384	-0.00417	0.175
1948	EFNB2 || ephrin-B2 (1)	0.035	-0.075	-0.035	0.665	-8.94e-10	-0.513	0.09	-0.463	0.1	-0.878	-0.443
1952	CELSR2 || cadherin, EGF LAG seven-pass G-type receptor 2 (flamingo homolog, Drosophila) (1)	0.4	0.12	-0.12	-0.7	0.453	-1.19e-09	0.413	-0.278	0.563	-0.845	-1.3
1954	EGFL4 || EGF-like-domain, multiple 4 (1)	-0.04	0.11	0.04	-0.5	-0.055	-0.368	0.775	-0.455	0.035	-0.0634	-1.16
195827	C9orf21 || chromosome 9 open reading frame 21 (1)	-0.255	0.025	-0.025	0.115	0.249	0.676	-0.511	0.05	2.14	-0.249	0.23
195828	ZNF367 || zinc finger protein 367 (1)	-0.12	-0.14	0.12	0.84	0.16	-0.053	-0.84	0.21	0.45	0.222	0.95
196051	PPAPDC1 || phosphatidic acid phosphatase type 2 domain containing 1 (2)	0.145	-0.135	0.135	-0.495	0.02	0.017	0.535	-0.018	-0.245	-0.238	-0.438
196074	METT5D1 || methyltransferase 5 domain containing 1 (2)	-0.06	-0.22	0.075	0.06	0.5	0.412	-0.595	0.568	0.385	-0.428	0.212
1962	EHHADH || enoyl-Coenzyme A, hydratase/3-hydroxyacyl Coenzyme A dehydrogenase (1)	-0.08	0.07	-0.07	0.48	0.651	0.0385	-0.528	-0.245	0	0.973	1.75
196294	FLJ25059 || hypothetical protein FLJ25059 (2)	-0.228	0.113	-0.113	0.182	-0.185	0.307	0.37	0.172	-0.78	0.562	0.637
196383	MGC7036 || hypothetical protein MGC7036 (1)	0.25	0.6	-1.48	-0.25	0.908	-0.245	-0.162	-0.493	1.67	2.68e-08	1.77
196394	LOC196394 || hypothetical protein LOC196394 (1)	-0.005	-0.285	0.345	0.005	0.41	-0.143	-0.15	-0.02	1.14	0.572	1.48
1964	EIF1AX || eukaryotic translation initiation factor 1A, X-linked (3)	-0.02	0.02	-1.13	0.987	-1.77e-08	0.194	-0.853	0.666	-0.378	-0.0914	0.457
196483	SB153 || hypothetical protein SB153 (3)	-0.132	0.132	0.339	-0.325	-0.472	0.185	0.383	-0.115	-0.437	0.00465	-0.165
196513	DCP1B || DCP1 decapping enzyme homolog B (S. cerevisiae) (1)	-0.375	-0.435	0.525	0.375	-0.097	2.5e-08	0.393	-0.135	-0.137	0.00465	-0.635
196515	FLJ30092 || AF-1 specific protein phosphatase (1)	0.275	-0.375	-0.115	0.115	1.09	0.147	0.4	-0.133	-0.61	-0.738	0.027
1967	EIF2B1 || eukaryotic translation initiation factor 2B, subunit 1 alpha, 26kDa (2)	-0.475	-0.245	0.245	0.425	-1.1e-08	0.22	-0.667	-0.872	0.95	0.169	0.988
1968	EIF2S3 || eukaryotic translation initiation factor 2, subunit 3 gamma, 52kDa (1)	2.82e-08	-0.01	0.51	0	-0.09	0.387	-0.91	0.64	0.1	-0.368	0.35
197258	FUK || fucokinase (1)	-0.15	0.34	0.15	-0.42	-0.08	-0.933	0.65	-0.013	0.21	0.832	-0.903
1973	EIF4A1 || eukaryotic translation initiation factor 4A, isoform 1 (3)	0.618	0.548	-0.548	-0.958	-5.07e-09	0.107	-0.217	0.112	-0.38	-0.348	-0.918
197336	LOC197336 || similar to RIKEN cDNA 3230401M21 [Mus musculus] (1)	0.05	0.03	-0.03	-0.94	0.18	-0.453	1.29	-0.323	-0.53	0.232	-1.17
197370	NSMCE1 || non-SMC element 1 homolog (S. cerevisiae) (1)	-0.025	0.035	0.025	-0.705	-0.56	0.097	-0.04	-0.215	-0.34	-0.858	0.215
1974	EIF4A2 || eukaryotic translation initiation factor 4A, isoform 2 (1)	-0.285	-0.145	0.605	0.145	0.22	0.097	-1.32	0.22	-2.79e-08	-0.738	0.7
197407	ZNF553 || zinc finger protein 553 (2)	-0.075	0.075	-0.215	1.31	-0.172	-1.03	0.138	-0.163	-0.727	4.1e-10	-0.787
1975	EIF4B || eukaryotic translation initiation factor 4B (3)	0.27	0.04	-0.74	-0.04	0.327	0.49	-0.77	0.547	-0.22	-2.01	-0.208
1977	EIF4E || eukaryotic translation initiation factor 4E (3)	-0.25	-0.03	0.03	0.95	-0.363	0.577	-0.406	0.344	0.247	0.709	1.18
1979	EIF4EBP2 || eukaryotic translation initiation factor 4E binding protein 2 (2)	-0.05	0.4	0.05	-0.05	0.008	2.03e-08	-0.072	0.152	-0.462	-0.285	-0.078
1981	EIF4G1 || eukaryotic translation initiation factor 4 gamma, 1 (1)	0.26	0.14	-0.14	-0.73	8.94e-10	-0.103	1	-0.733	-0.14	-0.388	-0.328
1983	EIF5 || eukaryotic translation initiation factor 5 (3)	-0.36	-0.3	0.3	1.03	0.002	0.681	1.05e-08	0.02	-0.469	-0.279	-0.02
1992	SERPINB1 || serine (or cysteine) proteinase inhibitor, clade B (ovalbumin), member 1 (1)	-0.395	-0.065	1.02	0.065	0.06	0.817	1.64e-09	0.267	-0.1	0.142	0.797
1994	ELAVL1 || ELAV (embryonic lethal, abnormal vision, Drosophila)-like 1 (Hu antigen R) (2)	-1.14	-0.1	0.1	0.36	0.415	0.447	0	-0.147	0.295	-0.393	0.383
199692	ZNF627 || zinc finger protein 627 (1)	-9.98e-09	-0.16	0.43	0	-1.34e-08	0.507	-0.04	0.225	-0.73	0.702	-0.025
199704	ZNF585A || zinc finger protein 585A (3)	-0.1	-0.217	0.1	0.733	-0.127	0.15	9.54e-09	-0.104	0.41	0.632	0.302
199746	U2AF1L3 || U2(RNU2) small nuclear RNA auxiliary factor 1-like 3 (1)	0.485	0.365	-0.365	-0.705	-0.1	-0.263	0.66	-0.03	-0.4	0.112	-0.53
1998	ELF2 || E74-like factor 2 (ets domain transcription factor) (5)	0.356	-0.556	-0.356	1.14	0.216	0.573	8.58e-09	0.324	-0.172	-0.592	0.183
199800	LOC199800 || hypothetical protein LOC199800 (1)	6.71e-09	0.08	-0.29	0	-0.143	0.0135	0.776	0.347	0	-0.232	-0.883
2000	ELF4 || E74-like factor 4 (ets domain transcription factor) (1)	0.19	0.02	-0.24	-0.02	-0.36	-0.463	0.34	-0.443	1.32	1.16	0.597
200014	KIAA1836 || KIAA1836 protein (2)	0.198	-0.0375	0.0375	-0.142	-0.075	-0.573	-0.455	-0.468	1.48	0.0867	0.468
200030	LOC200030 || hypothetical protein LOC200030 (1)	0.205	-0.095	0.095	-0.105	0.35	-0.293	0.05	0.007	1.07	0.872	0.532
200035	NUDT17 || nudix (nucleoside diphosphate linked moiety X)-type motif 17 (1)	-0.015	0.085	0.015	-0.045	0.35	0.267	0.05	-0.28	-0.58	-0.218	-0.91
200081	DKFZp451J0118 || taxilin (1)	0.265	0.095	-0.095	-0.535	-0.06	-0.133	0.74	-1.03	1.03	0.242	-0.295
200186	TORC2 || transducer of regulated cAMP response element-binding protein (CREB) 2 (2)	-0.03	0.06	0.03	-0.3	-0.405	-0.803	0.245	-0.626	0.055	0.427	-1.25
2002	ELK1 || ELK1, member of ETS oncogene family (2)	-0.05	0.05	0.11	-0.77	-0.0216	-0.12	0.708	-0.26	-0.287	3.58e-09	-1.08
200205	C1orf69 || chromosome 1 open reading frame 69 (1)	-0.12	0.2	2.06e-08	0	-0.497	-1.31e-08	1.42	-0.11	-1.08	1.17	-1.17
200576	PIP5K3 || phosphatidylinositol-3-phosphate/phosphatidylinositol 5-kinase, type III (1)	-5.21e-09	-0.44	0.12	0	0.33	0.337	0.55	0.085	-0.45	-0.138	-0.085
200734	SPRED2 || sprouty-related, EVH1 domain containing 2 (1)	-0.12	-0.2	0.19	0.12	-0.51	-0.633	3.58e-08	-0.36	1.38	0.612	1.61
200810	LOC200810 || similar to beta-1,4-mannosyltransferase; beta-1,4 mannosyltransferase (1)	0.255	0.065	-0.065	-0.365	-0.293	0.0335	0.727	0.02	0	0.528	-0.04
200845	KCTD6 || potassium channel tetramerisation domain containing 6 (2)	-0.03	-0.02	0.02	0.265	1.76e-08	0.432	-0.575	0.117	0.045	0.0267	0.158
200894	ARL2L1 || ADP-ribosylation factor-like 2-like 1 (3)	-0.48	0.11	-0.11	1.03	0.108	0.408	-0.652	0.46	1.14	-1.31	0.85
2009	EML1 || echinoderm microtubule associated protein like 1 (1)	-3.86e-08	-0.28	0.55	0	-0.05	0.357	-0.58	0.047	1.08	-0.308	0.657
200916	RPL22L1 || ribosomal protein L22 like 1 (2)	-0.26	-0.215	0.215	0.28	-6.26e-09	0.162	0.355	0.494	-1.29	-0.303	-0.675
200933	FBXO45 || F-box protein 45 (2)	0.0325	-0.0325	-0.0725	0.302	0.155	0.292	-0.16	0.268	0.09	-0.573	-0.0425
200942	MGC35097 || hypothetical protein MGC35097 (1)	0.275	0.445	-0.275	-0.905	-0.1	-0.143	0.91	-1.14	1.1	1.54	-0.273
201161	PRR6 || proline rich 6 (1)	0.05	-0.05	0.13	-0.33	-0.4	0.107	0.9	-0.895	-0.23	1.33	-0.305
201163	FLCN || folliculin (3)	0.015	0.315	-0.015	-0.065	0.391	7.87e-09	0.896	-0.0385	-0.049	0.948	-0.174
201164	LOC201164 || similar to CG12314 gene product (1)	0.04	-0.04	0.64	-0.15	5.66e-09	-0.103	0.05	-0.51	0.16	-0.198	0.01
201229	LOC201229 || hypothetical protein LOC201229 (2)	0.613	0.297	-0.297	-0.618	0.228	-3.22e-08	-0.007	-0.487	1.65	1.29	1.26
201266	SLC39A11 || solute carrier family 39 (metal ion transporter), member 11 (1)	-0.14	0.14	-0.27	0.16	0.00417	-0.179	-0.196	-0.878	0	-0.00417	0.352
201292	TRIM65 || tripartite motif-containing 65 (1)	-0.045	0.115	0.045	-0.615	0.0865	-0.0865	0.737	0.182	-0.114	-0.582	-0.738
201299	RAD52B || RAD52 homolog B (S. cerevisiae) (1)	0.1	0.36	-0.1	-0.72	-0.03	0.157	-0.07	-0.708	2.22e-08	-0.558	-0.618
2013	EMP2 || epithelial membrane protein 2 (1)	7.9e-09	-0.63	0.41	0	-0.72	-0.903	-4.77e-09	-0.685	0.18	0.312	0.215
2014	EMP3 || epithelial membrane protein 3 (2)	0.52	0.01	-0.01	-0.1	-0.895	0.032	0.3	0.547	-1.21	0.172	-0.643
201514	ZNF584 || zinc finger protein 584 (1)	-0.1	0.02	-0.02	0.05	-0.06	-0.153	0.32	-0.615	-8.79e-09	0.152	0.145
201562	PTPLB || protein tyrosine phosphatase-like (proline instead of catalytic arginine), member b (1)	0.05	-0.38	-8.05e-09	0	-0.274	-0.0865	-1.16	0.125	0.0865	0.168	-0.125
201595	SIMP || source of immunodominant MHC-associated peptides (1)	-0.255	-0.095	0.095	0.575	-1.34e-08	0.097	-0.21	-0.07	0.31	-0.238	0.52
201626	2'-PDE || 2'-phosphodiesterase (1)	-0.565	-0.305	0.305	0.575	0.03	-0.283	-0.69	-0.818	-6.41e-09	-0.788	0.392
201627	FLJ34969 || hypothetical protein FLJ34969 (1)	0.04	-0.12	-0.04	0.09	0.144	-0.569	-0.676	-0.35	1.16	0.106	1.08
2017	CTTN || cortactin (1)	0.12	-0.22	1.58e-08	0	0.13	0.772	0.4	-4.89e-08	-0.13	-0.538	-1.19
201725	LOC201725 || hypothetical protein LOC201725 (2)	-0.295	-0.52	0.295	0.54	-0.252	2.74e-08	0.038	-0.0105	2.45	1.77	2.78
201965	MGC10198 || hypothetical protein MGC10198 (2)	0.193	-0.0025	-0.598	0.0025	0.32	0.042	-0.38	0.71	0.21	0.117	0.21
2020	EN2 || engrailed homolog 2 (1)	0.25	-0.06	-0.18	0.06	1.49e-09	-0.333	-0.32	-0.8	0.86	-0.128	-0.06
202018	FLJ90013 || hypothetical protein FLJ90013 (1)	0.095	-0.095	-0.315	0.105	0.44	-0.023	-0.675	-0.0655	0.17	0.182	0.419
2021	ENDOG || endonuclease G (1)	0.02	0.04	-0.02	-0.82	-0.462	-0.155	1.11	0.045	-0.862	-6.56e-09	-0.235
202181	LOC202181 || hypothetical protein LOC202181 (1)	-0.275	0.005	-0.005	0.335	-0.189	-0.181	2.04	0.07	0.392	-0.367	-0.46
2022	ENG || endoglin (Osler-Rendu-Weber syndrome 1) (3)	-0.03	0.03	0.16	-0.25	-0.774	4.77e-09	0.593	-0.221	-0.15	1.59	-0.105
202227	na || similar to peptidyl-Pro cis trans isomerase (1)	0.12	0.04	-0.04	-0.38	-0.0517	0.215	0.508	0.225	-0.132	7.75e-09	-0.155
202459	LOC202459 || similar to RIKEN cDNA 2310008M10 (1)	0.035	0.305	-0.215	-0.035	0.113	2.98e-09	-2.14	0.175	0.813	1.43	0.05
2026	ENO2 || enolase 2 (gamma, neuronal) (1)	0.21	0.16	-0.16	-0.84	-1.49e-09	-0.263	0.07	1.08e-07	-0.06	-0.758	-1.24
203	AK1 || adenylate kinase 1 (1)	0.12	0.55	-0.12	-0.84	-0.025	-0.368	0.395	-0.42	-0.145	-0.383	0.19
2030	SLC29A1 || solute carrier family 29 (nucleoside transporters), member 1 (1)	-0.115	0.115	0.305	-0.425	-0.917	5.96e-09	-0.552	-0.62	2.59	2.65	0.185
203068	TUBB || tubulin, beta polypeptide (2)	0.0975	0.367	-0.0975	-0.487	-0.492	-0.265	-0.192	0.74	0.248	1.49e-08	-0.43
203069	LOC203069 || hypothetical protein LOC203069 (3)	0.21	0.533	-0.21	-0.86	-0.5	-0.383	0.837	0.003	0.215	1.07	-0.003
203076	LOC203076 || similar to RIKEN cDNA 4930578I06 (1)	0.31	0.45	-0.31	-0.45	-0.565	-0.368	-9.54e-09	0.652	-0.055	0.0966	-1.03
203197	C9orf91 || chromosome 9 open reading frame 91 (1)	-0.11	0.11	-0.76	0.11	0.043	0	0.523	-2.03e-08	0.543	-0.285	-0.49
203245	C9orf90 || chromosome 9 open reading frame 90 (1)	0.08	-0.08	-0.33	0.28	0.285	-0.138	-0.065	-0.248	0	0.307	1.07
203259	C9orf25 || chromosome 9 open reading frame 25 (1)	6.71e-09	0.01	-0.32	0	9.24e-09	-0.193	0.48	-0.045	-0.23	-0.0984	-1.33
203260	MGC31967 || hypothetical protein MGC31967 (1)	0.645	0.595	-1.35	-0.595	-1.82e-08	0.367	0.71	-0.218	-0.41	-0.428	-0.413
203286	SAMD6 || sterile alpha motif domain containing 6 (2)	-0.128	0.0175	0.0225	-0.0175	0.445	-0.323	0.245	-0.048	0.5	-0.258	-0.238
2033	EP300 || E1A binding protein p300 (1)	0.1	-0.1	-0.95	0.5	0.46	-0.013	0.45	0.397	-1.24e-08	-0.178	-0.653
203411	LOC203411 || hypothetical protein LOC203411 (1)	0.11	-0.11	-0.53	0.17	0.063	3.58e-09	-0.087	-0.035	0.063	0.285	0.215
203427	LOC203427 || similar to solute carrier family 25 , member 16 (1)	-0.305	0.025	0.115	-0.025	0.15	-0.053	-0.55	0.53	0.13	0.762	1.71
2035	EPB41 || erythrocyte membrane protein band 4.1 (elliptocytosis 1, RH-linked) (1)	0.335	0.295	-0.295	-0.505	0.15	-0.033	0.23	-0.095	0.17	-0.748	0.095
203547	LOC203547 || hypothetical protein LOC203547 (2)	-0.0375	0.0375	0.0775	-0.0525	0.46	0.347	1.07e-08	-0.0225	-0.07	-0.618	0.188
2036	EPB41L1 || erythrocyte membrane protein band 4.1-like 1 (2)	-0.665	0.035	-0.035	0.465	-0.27	-0.403	0.584	-0.135	0	-0.658	-0.318
203859	TMEM16E || transmembrane protein 16E (1)	-0.1	0.1	-0.33	0.14	0.486	0.0235	-0.0235	-0.075	0	-0.392	0.675
204	AK2 || adenylate kinase 2 (3)	-0.535	-0.175	0.175	0.395	-0.0386	0.342	-0.119	0.0725	1.03	-1.85e-08	0.6
2040	STOM || stomatin (4)	-0.138	-0.45	0.412	0.138	6.86e-09	0.047	-0.197	0.312	2.92	2.55	3.32
2043	EPHA4 || EPH receptor A4 (2)	-0.468	0.468	-0.547	1.27	0.045	0.132	-0.425	0.442	1.11	-0.533	1.43
2048	EPHB2 || EPH receptor B2 (2)	0.135	0.07	-0.605	-0.07	-0.577	-0.66	0.703	-0.05	-0.362	-1.37e-08	0.05
205	AK3L1 || adenylate kinase 3-like 1 (2)	-0.065	0.3	0.065	-0.435	0.073	0.353	-0.467	0.485	-0.797	0.255	-0.329
2050	EPHB4 || EPH receptor B4 (1)	0.22	0.07	-0.07	-0.62	-0.04	-0.783	0.9	-0.083	0.87	0.472	1.1
205251	LOC205251 || hypothetical protein LOC205251 (1)	-9.58e-08	-0.21	0.01	0	-0.41	0.347	0.64	0.31	-0.61	0.592	0.19
205327	FLJ38973 || hypothetical protein FLJ38973 (1)	-0.28	-0.03	0.03	0.23	-2.3e-08	-0.013	-0.49	0.24	0.87	0.192	1.72
2054	EPIM || epimorphin (1)	-0.09	-0.32	0.09	0.09	1.64e-09	-0.063	-0.32	0.14	1.94	1.21	1.76
205428	MGC33365 || hypothetical protein MGC33365 (1)	0.225	0.065	-0.745	-0.065	0.286	-0.127	-0.744	0.16	2.5	1.26	2.5
205717	KIAA2018 || KIAA2018 (1)	0.095	-0.235	-0.095	0.845	-0.29	-0.003	0.62	0.14	1.55	0.212	1.1
2058	EPRS || glutamyl-prolyl-tRNA synthetase (3)	0.255	-0.255	-0.355	0.905	0.583	0.65	-0.51	0.565	0.32	-1.46	0.635
2063	NR2F6 || nuclear receptor subfamily 2, group F, member 6 (1)	0.19	0.24	-0.19	-1.26	0.085	-0.368	1.32	-0.325	-0.705	0.707	-0.175
206358	SLC36A1 || solute carrier family 36 (proton/amino acid symporter), member 1 (2)	-0.1	0.185	0.07	-0.07	-0.08	-0.068	8.94e-10	-1.05	0.975	-0.443	-0.28
2067	ERCC1 || excision repair cross-complementing rodent repair deficiency, complementation group 1 (includes overlapping antisense sequence) (5)	0.119	0.245	-0.119	-0.367	-0.238	0.117	0.224	0.11	-0.185	0.161	-0.61
207	AKT1 || v-akt murine thymoma viral oncogene homolog 1 (2)	-0.0825	0.318	0.0825	-0.443	6.86e-09	-0.008	1.02	0.06	-0.405	-0.418	-1.68
2071	ERCC3 || excision repair cross-complementing rodent repair deficiency, complementation group 3 (xeroderma pigmentosum group B complementing) (1)	0.37	0.01	-0.01	-0.13	-0.0535	0.0535	0.587	0.087	0.127	-0.352	-0.323
2077	ERF || Ets2 repressor factor (1)	-0.245	0.245	0.385	-1.25	-0.84	-1.05	0.87	0.4	0.33	0.382	-0.4
2098	ESD || esterase D/formylglutathione hydrolase (2)	-0.095	0.095	0.125	-0.51	-0.0517	0.0754	-0.742	-0.075	-0.392	8.94e-09	0.075
2101	ESRRA || estrogen-related receptor alpha (2)	-0.045	0.045	0.225	-0.385	-0.605	-0.538	1.02	-0.555	1.98e-08	1.75	-0.355
2107	ETF1 || eukaryotic translation termination factor 1 (2)	-0.147	-0.258	0.147	0.782	0.0333	-0.12	-0.382	0.307	0.918	5.36e-09	1.31
2108	ETFA || electron-transfer-flavoprotein, alpha polypeptide (glutaric aciduria II) (2)	-0.625	-0.435	0.605	0.435	0.138	1.02	0.288	-0.125	-0.417	5.36e-09	1.17
2109	ETFB || electron-transfer-flavoprotein, beta polypeptide (1)	0.37	0.37	-0.37	-1.16	0.493	-4.65e-08	0.503	-0.67	0.023	-0.295	1.01e-08
211	ALAS1 || aminolevulinate, delta-, synthase 1 (1)	6.71e-09	-0.02	0.31	0	-0.42	0.247	-0.22	-0.201	-0.01	0.212	0.284
2110	ETFDH || electron-transferring-flavoprotein dehydrogenase (1)	-0.16	-0.27	0.16	0.59	0.798	0.735	-0.512	0.28	0	-2.09e-08	1.18
2114	ETS2 || v-ets erythroblastosis virus E26 oncogene homolog 2 (avian) (2)	0.005	-0.005	-0.235	0.44	-0.113	0.004	5.24e-09	-0.3	0.177	-0.451	-0.01
2120	ETV6 || ets variant gene 6 (TEL oncogene) (1)	0.005	-0.075	0.015	-0.005	0.19	0.097	-1.19e-08	0.072	-0.02	-0.908	-0.718
2121	EVC || Ellis van Creveld syndrome (1)	0.595	0.075	-0.075	-0.255	0.322	-0.0215	0.732	-0.258	0.0215	-0.997	0.258
2122	EVI1 || ecotropic viral integration site 1 (2)	0.18	-0.18	-0.29	1.04	1.28e-08	0.022	-0.195	-0.275	1.01	-0.603	0.55
2130	EWSR1 || Ewing sarcoma breakpoint region 1 (3)	0.245	0.215	-0.215	-0.295	2.95e-08	0.037	0.11	-0.365	-0.96	-1.18	-1.01
2131	EXT1 || exostoses (multiple) 1 (1)	5.2e-08	0.12	-0.02	5.11e-08	0.073	1.43e-08	-0.537	-0.06	0.983	-0.355	0.58
2135	EXTL2 || exostoses (multiple)-like 2 (1)	0.05	0.07	-0.05	-0.39	-1.1e-08	0.037	0.18	0.3	0.28	-0.548	0.23
2137	EXTL3 || exostoses (multiple)-like 3 (1)	0.315	0.025	-0.025	-0.325	-0.05	-0.243	0.72	-0.535	0.01	-0.0784	-1.2
2145	EZH1 || enhancer of zeste homolog 1 (Drosophila) (1)	0.22	0.16	-0.37	-0.16	0.703	-8.34e-09	0.273	-0.383	-0.237	-0.325	-0.993
2146	EZH2 || enhancer of zeste homolog 2 (Drosophila) (4)	-0.407	-0.217	0.217	0.365	1.37e-09	0.219	-0.543	-0.412	0.185	-0.581	0.077
217	ALDH2 || aldehyde dehydrogenase 2 family (mitochondrial) (1)	0.41	0.77	-0.41	-0.41	0.51	-0.173	-1	0.257	0.05	-1.15	-0.753
2171	FABP5 || fatty acid binding protein 5 (psoriasis-associated) (2)	0.23	0.21	-0.21	-0.45	-0.1	0.337	-1	-0.3	-0.83	-1.54	-0.57
2175	FANCA || Fanconi anemia, complementation group A (3)	-0.103	0.137	-0.143	0.103	0.0464	0.131	0.404	0.045	-0.259	-6.44e-09	-0.308
2176	FANCC || Fanconi anemia, complementation group C (1)	-0.035	-0.335	0.035	0.415	-0.03	-0.233	0.8	0.377	0	0.152	-1.05
2177	FANCD2 || Fanconi anemia, complementation group D2 (2)	-0.492	-0.0525	0.0525	0.537	-0.18	-0.208	9.54e-09	0.0875	0.43	-0.168	0.948
2178	FANCE || Fanconi anemia, complementation group E (2)	-0.545	0.065	0.045	-0.045	-0.555	0.142	0.5	-0.258	1.94e-09	0.777	-0.357
2182	ACSL4 || acyl-CoA synthetase long-chain family member 4 (2)	-0.147	-0.463	0.147	0.858	0.293	0.375	-0.117	0.383	0.443	-5.36e-09	0.547
2184	FAH || fumarylacetoacetate hydrolase (fumarylacetoacetase) (2)	0.04	-0.02	0.02	-0.81	-0.41	0.157	0.23	0.095	-0.24	-0.113	-0.41
2186	FALZ || fetal Alzheimer antigen (5)	-0.49	0.27	-0.27	0.8	0.793	-2.27e-08	0.421	0.102	0.143	-2.69	-0.128
2187	FANCB || Fanconi anemia, complementation group B (1)	-0.33	-1.71e-09	1.1	0	1.52e-08	-0.033	-0.63	-0.09	1.24	0.282	1.14
2189	FANCG || Fanconi anemia, complementation group G (2)	0.125	-0.005	-0.015	0.005	-0.35	-0.373	0.35	-0.0575	0.14	0.852	-0.487
219	ALDH1B1 || aldehyde dehydrogenase 1 family, member B1 (1)	-0.44	0.02	-0.02	0.81	0.133	-5.96e-09	-0.497	0.112	0.253	-1.48	-0.788
2192	FBLN1 || fibulin 1 (5)	0.183	0.306	-0.183	-0.184	-0.0677	-0.549	-0.0256	-0.192	0.0256	0.132	-0.459
219293	FLJ37183 || FLJ37183 protein (1)	0.31	0.18	-0.18	-0.99	-0.37	0.017	1.01	0.31	7.45e-10	0.842	-0.7
2193	FARSLA || phenylalanine-tRNA synthetase-like, alpha subunit (1)	0.15	0.24	-0.15	-0.46	-0.11	-0.463	0.83	-3.93e-08	-0.1	-0.198	-0.02
219402	MTIF3 || mitochondrial translational initiation factor 3 (1)	-5.77e-08	0.3	-0.14	0	0.49	0.497	-1.99	0.065	-0.6	-1.41	-0.065
219404	MGC9850 || hypothetical protein MGC9850 (1)	-0.22	-0.09	0.09	0.28	0.11	0.237	-0.5	0.035	0.05	-0.638	-0.375
2195	FAT || FAT tumor suppressor homolog 1 (Drosophila) (1)	0.05	-0.24	0.32	-0.05	0.89	-0.083	0.7	-0.116	2.93	0.372	0.424
219541	MED19 || mediator of RNA polymerase II transcription, subunit 19 homolog (yeast) (1)	0.265	0.145	-0.145	-0.415	0.2	0.297	0.24	-0.04	-0.46	-0.448	0.4
219654	C10orf56 || chromosome 10 open reading frame 56 (2)	0.877	-0.733	-0.0025	0.0025	6.26e-09	-0.923	-0.905	-0.388	2.31	0.0916	2.5
219699	UNC5B || unc-5 homolog B (C. elegans) (1)	0.105	-0.005	-0.315	0.005	-0.39	-0.393	0.35	-0.743	0	-0.178	-1.07
2197	FAU || Finkel-Biskis-Reilly murine sarcoma virus (FBR-MuSV) ubiquitously expressed (fox derived); ribosomal protein S30 (2)	0.395	0.32	-0.32	-0.63	-0.427	-1.19e-09	0.423	-2.38e-09	-0.827	-0.215	-0.25
219738	C10orf35 || chromosome 10 open reading frame 35 (1)	-0.01	0.06	-2.95e-08	0	-0.0617	0.775	0.758	0.17	-0.392	-5.36e-09	-0.15
219771	C10orf9 || chromosome 10 open reading frame 9 (3)	-0.156	0.156	-0.206	0.499	-0.235	-0.163	0.317	-0.121	0.195	-0.0833	-0.454
219844	HYLS1 || hydrolethalus syndrome 1 (1)	-0.055	-0.385	0.105	0.055	0.56	0.227	-1.19e-08	-0.298	-0.18	0.00165	0.272
219854	LOC219854 || hypothetical protein LOC219854 (2)	0.545	0.285	-0.285	-0.38	-0.175	0.022	0.45	-0.441	0.245	0.627	0.825
219899	LRRC35 || leucine rich repeat containing 35 (1)	-0.18	-0.14	0.14	0.75	0.72	0.387	-5.96e-10	0.085	1	-0.258	0.845
219902	MGC17839 || hypothetical protein MGC17839 (2)	-0.0125	-0.477	0.0125	0.492	-0.405	-0.068	0.37	-0.985	-0.22	0.0316	-0.17
219927	MRPL21 || mitochondrial ribosomal protein L21 (2)	0.292	0.207	-0.207	-0.237	0.7	0.707	-0.33	-0.141	4.92e-09	-0.338	0.46
219931	TPCN2 || two pore segment channel 2 (1)	0.055	-0.085	0.405	-0.055	0.12	-0.463	0.84	0.202	0.11	0.192	-0.413
220002	CYBASC3 || cytochrome b, ascorbate dependent 3 (1)	-0.29	1.02e-08	0.14	0	-0.24	-0.103	0.86	-0.405	-0.32	0.682	-0.325
220042	FLJ25416 || hypothetical protein FLJ25416 (2)	0.255	-0.24	-0.515	0.24	0.29	-0.113	-0.44	0.548	1.34	0.652	1.75
220064	ORAOV1 || oral cancer overexpressed 1 (1)	0.115	0.005	-0.115	-0.005	0.05	0.037	-0.225	0.412	0.94	0.642	-0.293
220074	LRRC51 || leucine rich repeat containing 51 (2)	0.233	0.247	-0.233	-0.623	-0.365	-0.578	-0.04	-0.136	0.655	0.592	0.69
220134	C18orf24 || chromosome 18 open reading frame 24 (1)	-0.135	-0.295	0.375	0.135	-0.35	-0.103	-0.22	-0.12	0.1	-0.128	0.12
220686	LOC220686 || hypothetical protein LOC220686 (2)	0.318	0.142	-0.142	-0.273	0.635	-0.133	0.36	-0.198	-0.21	0.632	-0.178
220869	LOC220869 || dopamine responsive protein (1)	0.005	-0.005	0.055	-0.075	0.504	0.581	-1.49	1.53	-0.366	0.106	0.165
220885	LAMR1P15 || laminin receptor 1 pseudogene 15 (1)	0.055	0.255	-0.055	-0.635	-0.025	0.242	0.135	1.18	-0.615	-0.143	0.23
220906	LOC220906 || hypothetical protein LOC220906 (2)	0.128	0.0425	-0.203	-0.0425	0.45	0.397	-0.07	-0.194	-0.235	-1.06	-0.264
220972	MARCH8 || membrane-associated ring finger (C3HC4) 8 (1)	0.32	0.07	-0.1	-0.07	0.46	-0.063	0.08	-0.215	1.26	0.752	0.865
221002	RASGEF1A || RasGEF domain family, member 1A (1)	0.23	-0.07	5.87e-08	0	-0.09	0.237	-0.46	0.422	0.36	-0.148	0.332
221017	C10orf37 || chromosome 10 open reading frame 37 (1)	-0.62	-0.38	0.46	0.38	0.6	0.037	-0.79	0.04	0.56	-0.0483	0.7
221035	C10orf74 || chromosome 10 open reading frame 74 (2)	-0.0375	0.0375	-0.343	0.667	0.475	0.432	-0.93	0.316	1.39e-08	-0.0233	1.49
221120	DEPC-1 || prostate cancer antigen-1 (3)	0.155	0.179	-0.155	-0.231	5.19e-09	0.347	-0.38	-0.186	-0.18	-0.485	0.318
221143	LOC221143 || hypothetical protein LOC221143 (1)	5.51e-09	0.13	-0.06	0	-0.0835	0.0835	-0.394	-0.04	-0.564	-0.272	-0.63
221150	C13orf3 || chromosome 13 open reading frame 3 (2)	-0.323	-0.463	0.637	0.323	0.58	0.622	-1.49e-09	0.0775	1.08	-0.128	0.207
221154	EFHA1 || EF hand domain family, member A1 (2)	-0.795	-0.375	0.375	1	0.615	1.32	-0.42	1.21	-0.25	-0.233	0.305
221184	CPNE2 || copine II (2)	-0.818	0.782	-0.0425	0.0425	-0.27	-0.153	7.45e-11	0.112	0	0.562	-0.828
221362	LOC221362 || hypothetical protein LOC221362 (2)	0.085	-0.085	-0.395	0.705	-0.14	-0.143	-0.3	-0.29	0.28	-1.11	0.135
221443	C6orf130 || chromosome 6 open reading frame 130 (1)	0.1	2.21e-08	-0.1	0	4.47e-09	0.537	-0.07	0.51	-0.12	-1.09	-0.35
221491	C6orf1 || chromosome 6 open reading frame 1 (2)	0.13	-0.81	0.38	-0.13	-0.24	-0.483	-2.15e-08	-0.435	-0.15	0.0916	-0.085
221496	LEMD2 || LEM domain containing 2 (1)	0.17	0.41	-0.17	-0.27	-0.01	-0.523	0.53	-0.21	0.58	0.0717	-0.82
221545	C6orf136 || chromosome 6 open reading frame 136 (1)	0.235	0.045	-0.045	-0.345	-0.17	-0.173	-3.58e-08	-0.133	0.15	-0.358	-0.123
2217	FCGRT || Fc fragment of IgG, receptor, transporter, alpha (1)	0.255	0.315	-0.255	-0.855	-0.38	-0.413	0.7	-1.19e-09	0.11	0.532	-0.46
2218	FCMD || Fukuyama type congenital muscular dystrophy (fukutin) (1)	0.26	0.1	-0.39	-0.1	0.1	0.017	2.62e-08	0.03	-0.6	-0.888	-0.02
221908	MGC22793 || hypothetical protein MGC22793 (2)	-0.0525	0.0525	0.142	-0.642	-0.157	2.98e-09	1.11	0.07	-0.757	0.445	-0.76
221927	C7orf27 || chromosome 7 open reading frame 27 (2)	-0.06	0.19	0.06	-1	-0.45	-0.263	1.56	-0.3	0.64	1.64	-0.45
221937	FOXK1 || forkhead box K1 (2)	0.76	-0.03	0.03	-0.52	-0.502	-0.625	0.652	-0.07	-0.443	0.604	-0.39
221955	LOC221955 || KCCR13L (2)	0.22	0.43	-0.33	-0.22	-0.092	-9.54e-09	0.653	-0.19	-0.657	0.335	-0.74
222068	TMED4 || transmembrane emp24 protein transport domain containing 4 (1)	-0.145	-0.145	0.435	0.145	1.04e-08	0.067	0.55	-0.29	-0.25	0.242	0.85
222166	Ells1 || hypothetical protein Ells1 (1)	-3.86e-08	-0.1	0.07	0	-0.03	0.127	0.03	0.427	1.98e-08	-1.12	-0.813
222194	RSBN1L || round spermatid basic protein 1-like (2)	-0.755	-0.295	0.295	1.39	0.73	0.652	-0.005	0.302	-0.465	-0.358	0.138
222229	DKFZp434K1815 || hypothetical protein DKFZp434K1815 (1)	-0.015	0.665	0.015	-0.985	-0.27	-0.743	1.4	-0.48	0.11	0.992	-0.83
2224	FDPS || farnesyl diphosphate synthase (farnesyl pyrophosphate synthetase, dimethylallyltranstransferase, geranyltranstransferase) (2)	0.175	0.145	-0.355	-0.145	-0.0825	0.539	0.0825	-0.475	0	-1.21	0.195
222484	LNX2 || ligand of numb-protein X 2 (1)	-0.085	-0.315	0.185	0.085	-5.63e-08	-0.343	-0.28	0.095	0.92	0.942	1.85
222658	C6orf69 || chromosome 6 open reading frame 69 (1)	-0.45	-0.05	0.05	0.53	4.38e-08	0.317	-0.9	0.457	0.26	-0.898	-0.108
222699	LOC222699 || transducer of erbB-2 2 related gene (1)	0.195	-0.055	-0.055	0.055	-0.355	-0.098	7.15e-09	0.19	0.815	0.482	-0.19
222962	SLC29A4 || solute carrier family 29 (nucleoside transporters), member 4 (2)	0.19	0.25	-0.19	-0.96	-0.855	-1.67	0.42	-0.391	0.47	0.0717	-0.356
2230	FDX1 || ferredoxin 1 (1)	-0.135	0.085	-0.005	0.005	-0.32	0.817	0.41	-0.155	1.64e-09	0.262	0.235
2232	FDXR || ferredoxin reductase (2)	0.0875	0.917	-0.0875	-1.17	-0.203	0.0285	1.6	-0.07	-0.903	1.09	-1.05
2237	FEN1 || flap structure-specific endonuclease 1 (2)	0.285	0.185	-0.185	-0.245	0.19	0.192	-0.625	-0.072	-0.175	-1.42	0.072
224	ALDH3A2 || aldehyde dehydrogenase 3 family, member A2 (2)	-0.492	-0.142	0.142	0.603	-1.79e-09	-0.033	-0.14	-0.869	0.49	0.0216	0.371
2245	FGD1 || FYVE, RhoGEF and PH domain containing 1 (faciogenital dysplasia) (1)	-0.03	0.11	0.03	-0.13	0.524	-0.229	1.14	-0.263	-0.0158	0.0158	-1.85
2247	FGF2 || fibroblast growth factor 2 (basic) (1)	-0.145	-0.175	0.145	0.265	0.59	0.077	-0.25	-0.295	0.24	-0.188	0.295
2256	FGF11 || fibroblast growth factor 11 (1)	-1.16e-09	0.36	7.82e-10	-0.47	-0.105	-0.608	0.115	0.035	-0.285	-0.303	-1.06
226	ALDOA || aldolase A, fructose-bisphosphate (3)	-0.18	0.06	0.44	-0.06	-0.717	-1.36e-08	0.091	-0.276	-0.344	0.668	-0.632
2271	FH || fumarate hydratase (1)	-0.425	-0.245	0.845	0.245	0.36	0.637	-0.82	0.055	0.35	-0.808	0.605
2273	FHL1 || four and a half LIM domains 1 (1)	-0.09	-0.07	0.28	0.07	-0.05	0.357	-0.09	-0.336	1.77	1.06	1.15
2274	FHL2 || four and a half LIM domains 2 (1)	-0.17	-0.06	0.68	0.06	-0.037	2.5e-08	0.413	0.18	2.23	2.21	2.6
2275	FHL3 || four and a half LIM domains 3 (2)	-0.1	0.04	0.47	-0.04	-0.88	-0.453	-7.15e-09	0.08	0.15	0.232	-0.7
22796	COG2 || component of oligomeric golgi complex 2 (1)	-0.285	-0.685	0.285	0.295	-0.24	0.257	0.03	0.467	-4.47e-10	-0.528	-0.243
228	ALDOAP2 || aldolase A, fructose-bisphosphate pseudogene 2 (1)	0.09	0.04	-0.04	-0.61	-0.82	-0.143	0.56	0.31	-0.52	0.0416	-0.33
2280	FKBP1A || FK506 binding protein 1A, 12kDa (4)	0.23	0.7	-0.23	-0.715	-0.215	-0.028	0.145	0.408	-1.49e-10	-0.0459	0.0285
22800	RRAS2 || related RAS viral (r-ras) oncogene homolog 2 (2)	-0.195	-0.22	0.195	0.265	-0.165	-0.048	1.19e-08	-0.425	0.565	0.00665	0.162
22803	XRN2 || 5'-3' exoribonuclease 2 (3)	-0.425	-0.075	0.075	1.26	2.43e-08	1.18	-0.14	0.45	0.683	0.235	1.71
22808	MRAS || muscle RAS oncogene homolog (1)	0.05	0.11	-0.31	-0.05	0.12	-0.033	-0.18	-0.508	0.49	-0.458	0.382
2281	FKBP1B || FK506 binding protein 1B, 12.6 kDa (1)	0.05	0.06	-0.05	-0.42	-0.49	-0.393	3.58e-09	-1.12	0.14	0.292	1.25e-08
22818	COPZ1 || coatomer protein complex, subunit zeta 1 (1)	0.025	0.475	-0.025	-0.315	-0.65	-0.133	-0.17	-0.103	0.52	0.722	0.227
22820	COPG || coatomer protein complex, subunit gamma (1)	-1.04e-09	0.03	-0.6	0	-0.98	-0.723	-0.69	-0.05	0.02	-0.848	-1.48
22826	DNAJC8 || DnaJ (Hsp40) homolog, subfamily C, member 8 (1)	0.09	-0.15	-0.09	0.14	0.34	0.217	5.96e-09	0.315	-0.48	-1.58	-0.315
22827	SIAHBP1 || fuse-binding protein-interacting repressor (3)	0.163	0.333	-0.163	-1.02	-0.75	-0.413	0.36	-0.18	-1.35	-0.528	-1.71
22834	ZNF652 || zinc finger protein 652 (1)	-7.67e-08	-0.38	0.27	0	-0.151	0.336	-0.181	0.95	-0.721	-0.0892	-0.07
22836	RHOBTB3 || Rho-related BTB domain containing 3 (3)	-0.195	0.195	-0.455	1.06	-0.64	-0.233	-2.38e-09	-0.259	-0.13	-0.818	0.259
22837	COBLL1 || COBL-like 1 (1)	0.01	-0.2	-0.01	0.21	0.76	-0.153	-0.1	0.138	0.61	-0.478	-0.138
22843	PPM1E || protein phosphatase 1E (PP2C domain containing) (1)	1.15e-08	-0.38	0.19	0	0.108	0.0254	-0.0416	0.105	-0.762	6.56e-09	0.465
22849	CPEB3 || cytoplasmic polyadenylation element binding protein 3 (1)	0.53	5.31e-08	5.39e-08	-0.24	0.72	0.397	-0.65	-1.19e-09	-0.17	-0.448	2.98e-09
22850	KIAA0863 || KIAA0863 protein (1)	-0.715	-0.605	0.605	0.785	1.76e-08	0.207	0.03	0.077	0.25	0.112	0.447
2286	FKBP2 || FK506 binding protein 2, 13kDa (3)	0.283	0.473	-0.283	-0.324	-0.3	-0.263	-2.57e-08	-0.005	-0.743	-1.15	0.005
22863	KIAA0831 || KIAA0831 (1)	-0.19	-0.35	0.2	0.19	0.27	0.577	-2.38e-09	0.32	-0.62	-0.938	-0.1
22870	KIAA1115 || KIAA1115 (1)	0.795	1.19	-0.795	-1.58	0.0883	-0.405	0.288	0.387	-0.102	2.2e-08	-1.44
22872	SEC31L1 || SEC31-like 1 (S. cerevisiae) (2)	-0.58	-0.32	0.32	0.705	0.105	0.247	-0.212	-0.0262	0.22	-0.453	-0.129
22876	INPP5F || inositol polyphosphate-5-phosphatase F (11)	-0.5	-0.53	0.885	0.5	0.398	0.29	3.41e-09	0.419	-0.807	-0.355	-0.015
22878	KIAA1012 || KIAA1012 (2)	-0.23	-0.21	0.21	1	-0.02	0.497	-1.43e-08	0.855	-0.47	0.177	0.325
22879	MON1B || MON1 homolog B (yeast) (2)	-0.065	0.065	-0.335	0.205	0.31	-0.193	0.06	0.04	-5.21e-09	-0.108	-0.04
22880	ZCWCC1 || zinc finger, CW type with coiled-coil domain 1 (1)	0.52	0.4	-0.49	-0.4	0.46	-0.123	0.89	-0.323	-0.52	-0.0784	-0.813
22882	ZHX2 || zinc fingers and homeoboxes 2 (1)	0.14	-0.22	-0.14	0.26	-1.46e-08	-0.213	0.44	-0.098	-0.47	-0.448	0.142
22883	CLSTN1 || calsyntenin 1 (1)	0.38	-4.1e-09	-0.45	0	-0.02	-0.163	0.36	0.377	-0.28	-0.648	-0.563
22884	WDR37 || WD repeat domain 37 (1)	0.05	0.04	-0.25	-0.04	0.05	0.057	-0.22	0.132	-0.31	-0.0583	0.022
22887	FOXJ3 || forkhead box J3 (1)	-0.035	-0.075	0.035	0.125	-0.25	0.027	-0.32	0.32	0.98	0.192	1.27
22888	UBOX5 || U-box domain containing 5 (3)	0.075	0.095	-0.075	-0.175	3.9e-08	-0.258	0.45	-0.145	0.37	0.542	-0.295
22889	KIAA0907 || KIAA0907 protein (2)	0.895	-0.195	0.185	-0.185	-0.288	-0.116	0.257	0.055	-0.523	0.269	0.685
2289	FKBP5 || FK506 binding protein 5 (2)	-0.075	-0.325	0.075	1.1	-1.34e-08	0.122	-0.3	0.0275	-0.505	-1.05	-0.472
22894	KIAA1008 || KIAA1008 (2)	-0.0025	0.0025	-1.22	0.0675	0.63	0.272	-0.29	0.046	1.41	0.322	0.492
22902	RIPX || rap2 interacting protein x (1)	0.265	-0.045	-0.405	0.045	0.301	0.139	0.141	0.117	-0.139	-0.817	0.277
22903	BTBD3 || BTB (POZ) domain containing 3 (1)	0.085	-0.085	-0.265	0.635	-0.21	0.287	-0.36	0.085	-0.13	-0.118	-0.14
22904	KIAA0963 || KIAA0963 (1)	0.395	0.255	-0.255	-0.825	-0.32	-0.913	0.94	-0.165	0.32	0.962	-0.225
22905	EPN2 || epsin 2 (2)	-0.095	0.12	-0.805	0.095	3.28e-09	-0.403	0.743	-0.68	0.3	-0.0853	-0.417
22907	DHX30 || DEAH (Asp-Glu-Ala-His) box polypeptide 30 (1)	-1.12e-08	-0.06	0.15	0	5.96e-10	-0.383	1.46	-0.29	-0.62	0.152	-1.36
22908	SACM1L || SAC1 suppressor of actin mutations 1-like (yeast) (1)	-0.03	-0.26	0.03	0.16	0.31	-0.013	-0.13	0.365	0.95	0.482	1.66
22909	KIAA1018 || KIAA1018 protein (2)	-0.455	0.015	-0.015	0.215	-0.0135	-0.0115	0.371	-0.225	1.43	-0.417	0.225
2291	FOXG1A || forkhead box G1A (2)	0.31	-2.56e-08	-0.4	0	0.289	0.171	-0.171	0.195	-0.221	-0.299	0.184
22911	WDR47 || WD repeat domain 47 (1)	-0.065	-0.305	0.065	0.335	0.493	-1.79e-08	-0.277	-0.088	-0.107	0.0746	0.102
22913	RALY || RNA binding protein (autoantigenic, hnRNP-associated with lethal yellow) (1)	0.325	0.665	-0.325	-1.35	-0.562	0.185	1.03	-0.03	-0.692	3.16e-08	-1.22
22916	NCBP2 || nuclear cap binding protein subunit 2, 20kDa (1)	0.43	0.15	-0.3	-0.15	0.58	0.167	-0.92	-0.06	1.74e-08	-1.07	0.25
22919	MAPRE1 || microtubule-associated protein, RP/EB family, member 1 (2)	0.09	-0.185	-0.09	0.54	-0.192	1.43e-08	-0.347	0.04	0.583	-0.31	-0.04
22920	KIFAP3 || kinesin-associated protein 3 (1)	0.18	0.15	-0.15	-0.4	0.57	0.117	-0.73	-0.103	0.21	-0.408	0.837
22921	MSRB2 || methionine sulfoxide reductase B2 (1)	0.65	0.56	-0.56	-0.65	2e-08	0.187	0.33	0.375	-0.23	0.0916	0.815
22927	HABP4 || hyaluronan binding protein 4 (1)	0.275	-0.225	0.225	-0.415	2.95e-08	0.147	0.07	0.442	0	-1.47	-0.578
22929	SEPHS1 || selenophosphate synthetase 1 (2)	0.0825	-0.0825	-0.297	0.472	0.31	-0.033	4.77e-09	0.447	0.155	-0.428	-0.218
22931	RAB18 || RAB18, member RAS oncogene family (2)	-0.66	-0.285	0.285	0.35	2e-08	0.127	-1.05	0.193	0.51	-0.148	1.22
22932	POMZP3 || POM (POM121 homolog, rat) and ZP3 fusion (4)	0.345	0.075	-0.075	-0.355	-0.752	-0.555	-0.302	-0.34	-0.292	2.98e-09	-0.81
22933	SIRT2 || sirtuin (silent mating type information regulation 2 homolog) 2 (S. cerevisiae) (2)	-2.43e-08	-0.03	0.325	-2.52e-08	-1.03	-0.243	0.745	0.08	1.94e-09	1.46	-0.63
22936	ELL2 || elongation factor, RNA polymerase II, 2 (2)	-0.168	-0.133	0.133	0.492	-0.37	0.242	-0.27	0.385	0.33	0.302	0.529
22937	SCAP || SREBP cleavage-activating protein (1)	-2.83e-09	0.2	-8.94e-10	-0.2	-0.26	-0.523	1.09	-0.33	-3.13e-09	0.712	0.03
2294	FOXF1 || forkhead box F1 (1)	0.12	0.02	-0.02	-0.39	-0.157	-8.34e-09	-0.127	0.272	-0.057	-0.375	-0.038
2295	FOXF2 || forkhead box F2 (1)	0.08	0.25	-0.08	-0.68	-1.18	-0.793	0.37	-0.04	-0.17	0.652	-0.64
22950	SLC4A1AP || solute carrier family 4 (anion exchanger), member 1, adaptor protein (2)	-0.265	-0.125	0.125	0.875	0.88	0.917	-1.26	1.52	-1.36e-08	-0.778	0.725
22954	TRIM32 || tripartite motif-containing 32 (1)	-0.11	-0.13	0.11	0.39	-0.07	-0.143	0.18	0.025	1.32	-0.0583	0.825
22955	SCMH1 || sex comb on midleg homolog 1 (Drosophila) (2)	-0.185	0.085	0.04	-0.04	-0.497	-0.155	0.641	0.346	-0.647	-5.96e-10	-0.876
2296	FOXC1 || forkhead box C1 (2)	0.163	-0.163	0.247	-1.34	-0.167	-1.79e-08	1.21	0.55	-0.557	0.68	-1.77
22974	TPX2 || TPX2, microtubule-associated protein homolog (Xenopus laevis) (1)	-0.095	-0.075	0.075	0.285	-0.01	0.087	0.18	-0.925	0.48	-0.228	0.055
22977	AKR7A3 || aldo-keto reductase family 7, member A3 (aflatoxin aldehyde reductase) (1)	-0.045	0.045	0.255	-0.315	-0.507	0	0.473	0.26	1.23	2.27	1.31
22978	NT5C2 || 5'-nucleotidase, cytosolic II (2)	-0.403	0.0225	-0.0225	0.177	0.59	0.307	-0.235	0.217	-0.31	-0.718	0.644
22980	KIAA1049 || KIAA1049 protein (2)	-0.095	0.105	-0.105	0.095	0.013	4.89e-08	0.523	0.315	-0.477	-0.135	-0.555
22981	KIAA0980 || KIAA0980 protein (1)	0.425	0.375	-0.375	-0.805	1.1	-0.153	0.75	-0.095	-0.77	-0.268	-0.665
22983	MAST1 || microtubule associated serine/threonine kinase 1 (1)	-0.08	0.08	0.19	-1.22	-0.145	-1.84	0.885	-0.013	-0.765	0.147	-1.52
22984	PDCD11 || programmed cell death 11 (2)	-0.315	-0.395	0.345	0.315	1.15	-1.31e-08	1.56	0.402	0.453	-1.18	0.062
22985	ACIN1 || apoptotic chromatin condensation inducer 1 (1)	0.125	-0.105	0.105	-1.09	0.01	-0.273	0.85	0.225	-0.26	-0.158	-0.505
22990	PCNX || pecanex homolog (Drosophila) (1)	0.115	-0.105	-0.025	0.025	0.583	2.03e-08	0.323	0.127	0.373	-0.195	-0.393
22992	FBXL11 || F-box and leucine-rich repeat protein 11 (2)	0.0425	-0.0475	0.0675	-0.0425	0.805	-0.128	0.295	-0.063	0.725	-0.533	0.217
22993	KIAA0194 || KIAA0194 protein (2)	0.09	0.075	-0.075	-0.215	-0.115	-0.083	1.43	-0.0175	-6.41e-09	0.782	-0.782
230	ALDOC || aldolase C, fructose-bisphosphate (1)	-0.065	0.255	0.065	-0.375	-0.551	-0.424	-0.101	0.055	0.789	0.101	-0.185
23002	DAAM1 || dishevelled associated activator of morphogenesis 1 (1)	1.39e-08	-0.05	0.37	0	6.86e-09	0.307	-1.05	-0.328	0.78	-0.348	1.1
23005	MAPKBP1 || mouse mitogen-activated protein kinase binding protein 1-like (1)	-0.045	0.045	0.055	-1.09	0.82	-0.523	0.93	-0.0075	0	-0.288	-0.988
23014	FBXO21 || F-box protein 21 (2)	-0.52	0.12	-0.12	0.815	0.193	-4.47e-10	-0.602	0.505	0.173	-0.29	0.735
23015	GM88 || 88-kDa golgi protein (1)	0.105	0.455	-0.105	-0.165	-0.341	-2.92	-0.641	0.045	0.869	0.341	-0.045
23016	EXOSC7 || exosome component 7 (1)	0.35	0.05	-0.05	-0.56	1.28e-08	0.157	0.17	-0.67	-0.49	-0.958	0.09
23019	CNOT1 || CCR4-NOT transcription complex, subunit 1 (2)	-0.07	-0.21	0.07	0.21	0.135	-0.158	0.045	0.19	0.075	-0.523	-0.19
23020	ASCC3L1 || activating signal cointegrator 1 complex subunit 3-like 1 (2)	-0.14	-0.03	0.03	0.915	-0.277	-1.31e-08	0.013	-0.0355	-0.247	-0.28	-0.525
23022	KIAA0992 || palladin (1)	-0.03	-0.21	0.03	0.13	0.46	0.057	-0.18	0.185	0.91	0.232	0.755
23023	TMCC1 || transmembrane and coiled-coil domains 1 (1)	-0.01	-0.19	0.06	0.01	-2.53e-08	0.197	-0.03	-0.155	-0.13	-1.14	-0.215
23028	AOF2 || amine oxidase (flavin containing) domain 2 (1)	-0.265	-0.145	0.145	0.795	-0.11	0.377	-7.15e-09	0.225	-0.3	-0.778	-1.03
23029	KIAA0117 || KIAA0117 protein (2)	0.175	0.315	-0.325	-0.175	0.475	0.127	-1.97	0.142	0.46	-0.818	0.672
23030	JMJD2B || jumonji domain containing 2B (1)	0.4	0.21	-0.21	-1.13	0.5	-0.173	1.56	-0.328	-1.36e-08	-0.598	0.297
23032	USP33 || ubiquitin specific protease 33 (1)	-0.07	-0.07	0.07	0.75	0.643	0.61	-1.1	0.1	-0.232	-1.79e-09	-0.1
23034	SAMD4 || sterile alpha motif domain containing 4 (1)	0.045	-0.045	0.075	-0.105	0.0384	-0.455	0.0184	0.1	0	1.79e-09	0.58
23036	ZNF292 || zinc finger protein 292 (2)	-0.01	-0.01	0.01	0.77	0.515	0.197	-0.22	0.642	0.83	-0.628	1.33
23039	XPO7 || exportin 7 (1)	-0.375	0.105	-0.015	0.015	-0.257	-2.27e-08	-0.137	0.187	0.313	0.285	0.327
23041	KIAA1040 || KIAA1040 protein (1)	-0.23	-0.04	0.04	0.13	0.164	-0.139	0.0242	0.0525	-0.276	-0.0242	-0.0525
23042	KIAA0251 || KIAA0251 protein (1)	0.1	-0.22	-0.1	0.16	0.44	-0.043	-0.12	-0.21	1.05	-0.0784	1.18
23045	KIAA0826 || KIAA0826 (1)	0.3	-0.03	0.03	-0.26	1.07	0.436	0.239	0.0975	-0.341	-0.239	-0.0275
23047	APRIN || androgen-induced proliferation inhibitor (2)	0.29	-0.59	0.03	-0.03	0.35	0.074	0.045	0.595	0.14	-0.408	0.01
23049	SMG1 || PI-3-kinase-related kinase SMG-1 (11)	-0.553	-0.23	0.56	0.23	0.26	0.257	-0.21	0.165	-0.36	0.902	0.261
2305	FOXM1 || forkhead box M1 (1)	0.01	-0.01	-0.17	0.32	0.29	-0.143	1.07e-08	0.0625	0.16	-0.788	-0.407
23051	ZHX3 || zinc fingers and homeoboxes 3 (2)	0.16	0.475	-0.54	-0.16	0.267	-0.0765	0.436	0.154	-0.314	-0.172	0.299
23052	KIAA0830 || KIAA0830 protein (2)	-0.43	-0.31	0.31	1.16	0.173	1.55e-08	-0.567	0.42	1.87	0.00465	1.74
23053	KIAA0913 || KIAA0913 (1)	0.445	0.295	-0.295	-0.695	0.24	-0.363	1.03	-0.06	-1.12e-08	0.212	-1.51
23054	NCOA6 || nuclear receptor coactivator 6 (2)	0.02	0.34	-0.36	-0.02	-1.27	0.077	-0.545	-0.16	0.43	-0.848	0.16
23059	CLUAP1 || clusterin associated protein 1 (1)	0.33	0.07	-0.24	-0.07	0.43	0.537	-1.07e-08	0.822	-0.62	-0.768	0.042
23060	ZNF609 || zinc finger protein 609 (2)	0.0725	-0.0725	-0.662	0.0975	-0.187	-0.135	0.468	0.127	-0.632	-1.49e-10	-1.1
23061	KIAA0676 || KIAA0676 protein (1)	0.355	0.065	-0.405	-0.065	0.1	-0.373	0.07	-0.643	0.54	-0.918	-0.343
23062	GGA2 || golgi associated, gamma adaptin ear containing, ARF binding protein 2 (5)	-0.301	-0.0425	0.0425	0.426	-0.267	0.214	0.29	-0.248	1.09	0.547	0.834
23063	KIAA0261 || KIAA0261 (2)	-2.43e-08	-2.32e-08	-1.63	0.655	-0.15	0.142	-0.495	-0.11	0.71	-0.428	0.5
23065	KIAA0090 || KIAA0090 (1)	-0.03	0.06	-0.66	0.03	0.494	0.086	-0.111	0.544	-0.086	-0.264	-0.52
23067	KIAA1076 || KIAA1076 protein (2)	0.652	0.242	-0.242	-0.312	2.95e-08	-0.358	0.22	0.035	-0.36	-0.758	-0.57
23076	KIAA0179 || KIAA0179 (2)	0.085	-0.145	-0.085	0.255	0.615	-0.093	0.18	-0.372	-2.31e-08	-0.233	-0.422
23078	KIAA0564 || KIAA0564 protein (1)	-0.055	0.055	-0.075	0.325	1.12	0.487	-8.34e-09	1.15	0	-0.00835	-0.61
23080	KIAA0241 || KIAA0241 protein (2)	0.113	-0.113	-0.733	1.13	0.303	0.395	-0.502	0.14	-0.367	-2.38e-09	0.12
23082	PPRC1 || peroxisome proliferative activated receptor, gamma, coactivator-related 1 (1)	0.215	0.175	-0.485	-0.175	0.45	-0.023	1.79e-09	-0.938	0.515	-0.273	0.0875
23087	TRIM35 || tripartite motif-containing 35 (1)	-0.225	-0.265	0.455	0.225	0.099	0.016	-0.016	0.727	-1.1	-0.0794	0.012
2309	FOXO3A || forkhead box O3A (2)	0.005	-0.005	-0.56	0.075	-0.067	1.79e-08	-0.027	-0.0255	1.09	-0.29	0.17
23091	KIAA0853 || KIAA0853 (2)	-0.055	0.055	-0.185	0.165	-0.58	-0.553	3.58e-09	0.06	0.07	-0.0384	0.207
23093	KIAA0998 || KIAA0998 (1)	-4.47e-10	-0.44	0.3	0	0.16	0.127	0.45	-0.03	-0.39	-0.278	-0.56
23095	KIF1B || kinesin family member 1B (26)	0.0025	-0.343	-0.0025	0.372	0.15	0.219	5.53e-09	-0.075	0.11	-0.65	-0.525
23099	ZNF297B || zinc finger protein 297B (2)	-0.07	-0.13	0.07	1.64	-1.58e-08	0.092	-0.175	0.182	0.31	-0.118	0.587
231	AKR1B1 || aldo-keto reductase family 1, member B1 (aldose reductase) (2)	-0.16	0.16	0.43	-0.245	-0.871	0.071	0.394	-0.748	0	0.906	1.24
23102	KIAA1055 || KIAA1055 protein (1)	0.055	-0.005	-0.045	0.005	0.25	0.737	0.425	-0.028	-0.14	-0.168	-0.753
23107	MRPS27 || mitochondrial ribosomal protein S27 (2)	-0.517	-0.0825	0.182	0.0825	-0.39	0.057	-0.26	-0.11	7.9e-09	0.0916	0.48
23112	TNRC6B || trinucleotide repeat containing 6B (1)	0.185	0.135	-0.575	-0.135	2.24e-08	-0.098	0.675	-0.267	0.72	-0.243	0.246
23117	LOC23117 || KIAA0220-like protein (1)	0.185	0.105	-0.105	-0.305	0.92	0.107	0.43	-2.03e-08	-0.8	-0.788	-0.89
23118	MAP3K7IP2 || mitogen-activated protein kinase kinase kinase 7 interacting protein 2 (1)	-0.075	-0.405	0.075	0.455	0.17	0.047	-0.57	0.22	0.25	-0.288	0.85
23119	HIC2 || hypermethylated in cancer 2 (1)	0.07	-0.07	0.11	-1.18	0.26	-0.433	0.115	-0.05	-0.45	-1.2	-0.65
23126	POGZ || pogo transposable element with ZNF domain (1)	0.085	0.045	-0.045	-0.095	0.24	0.047	0.85	0.26	-0.12	-0.528	-0.26
23130	KIAA0404 || KIAA0404 protein (1)	0.04	-0.27	-4.14e-08	0	-0.19	-0.673	0.95	-0.765	6.11e-09	0.412	-1.26
23133	PHF8 || PHD finger protein 8 (1)	0.465	0.035	-0.265	-0.035	0.203	7.15e-09	0.713	-0.018	-0.987	-0.135	-1.43
23135	JMJD3 || jumonji domain containing 3 (2)	0.122	0.343	-0.122	-0.247	-0.155	-0.748	0.57	0.158	0.005	-0.663	-0.752
23136	EPB41L3 || erythrocyte membrane protein band 4.1-like 3 (2)	-0.345	-0.065	0.065	1.09	0.265	0.142	-0.51	0.213	0.27	-0.618	-0.0065
23139	MAST2 || microtubule associated serine/threonine kinase 2 (1)	0.465	0.135	-0.615	-0.135	0.003	2.5e-08	0.293	-0.168	-0.197	-0.155	-1.44
23141	KIAA0692 || KIAA0692 protein (2)	-0.0275	-0.0575	0.0275	0.362	0.165	0.247	-0.105	0.89	0.175	0.257	0.365
23142	KIAA0276 || KIAA0276 protein (1)	0.1	-0.44	2.68e-09	0	-0.0985	0.0285	-0.118	0.195	1.3	0.563	1.48
23144	ZC3HDC3 || zinc finger CCCH-type domain containing 3 (1)	0.25	0.27	-0.25	-1.13	3.28e-09	-0.353	1.24	-0.56	-0.03	0.212	-2.5
23149	FCHO1 || FCH domain only 1 (2)	0.115	-0.025	0.025	-0.475	-0.515	-0.468	-0.115	-0.425	0.405	0.417	-0.795
23154	NCDN || neurochondrin (1)	0.11	2.45e-08	-0.08	0	-0.05	-0.253	0.59	-0.175	0.09	0.292	-1.05
23155	MCLC || Mid-1-related chloride channel 1 (2)	-0.04	1.5e-08	0.51	1.3e-08	0.375	0.377	-0.42	-0.0025	0.605	-0.788	0.757
23158	KIAA0882 || KIAA0882 protein (1)	0.015	-0.015	-0.355	0.075	0.36	-0.303	-0.68	-0.12	0.35	-0.768	0.78
23160	WDR43 || WD repeat domain 43 (2)	-0.185	-0.015	0.015	0.115	0.01	-0.303	-0.29	0.567	0.075	-0.273	-0.148
23162	MAPK8IP3 || mitogen-activated protein kinase 8 interacting protein 3 (1)	0.37	0.41	-0.37	-1.38	1.15	-0.243	1.7	0.18	5.51e-09	0.232	-0.12
23163	GGA3 || golgi associated, gamma adaptin ear containing, ARF binding protein 3 (1)	0.07	-0.07	-0.16	0.43	2.98e-10	-0.033	0.07	-0.0615	-0.51	0.182	-0.371
23164	M-RIP || myosin phosphatase-Rho interacting protein (1)	0.08	0.1	-0.08	-0.75	0.31	-0.473	-0.15	-0.005	0.06	-0.678	-0.415
23167	KIAA0143 || KIAA0143 protein (1)	-0.09	-0.28	0.09	0.63	0.25	0.327	0.65	0.002	-0.37	-0.358	0.042
23168	KIAA0252 || KIAA0252 (2)	-0.0875	-0.0625	0.0625	0.188	0.118	-1.19e-08	0.188	-0.328	-0.592	-0.4	-0.158
23169	SLC35D1 || solute carrier family 35 (UDP-glucuronic acid/UDP-N-acetylgalactosamine dual transporter), member D1 (1)	-0.175	-0.385	0.175	0.945	-0.02	-0.143	-0.24	0.022	-0.28	0.00165	-0.368
2317	FLNB || filamin B, beta (actin binding protein 278) (1)	0.21	-0.11	6.26e-09	0	0.105	-0.853	-0.41	-0.208	0.52	0.342	0.862
23171	GPD1L || glycerol-3-phosphate dehydrogenase 1-like (1)	3.77e-08	-0.09	0.52	0	-0.71	0.037	-0.42	-0.018	0.47	-0.0984	0.272
23172	KIAA0157 || KIAA0157 (1)	-0.09	3.65e-09	0.04	1.64e-09	0.183	-8.34e-09	-1.18	0.32	1.18	0.745	0.94
23173	METAP1 || methionyl aminopeptidase 1 (1)	-0.165	-0.145	0.155	0.145	-1.22e-08	0.407	-0.77	1.17	1.26	0.632	0.562
23176	SEPT8 || septin 8 (2)	-0.065	-0.375	0.065	0.885	0.143	1.31e-08	-0.347	-0.427	-0.292	-0.42	0.0225
23177	KIAA0582 || KIAA0582 (2)	-0.163	0.0075	-0.0075	0.623	-0.0717	-0.22	0.338	0.0675	0.373	5.96e-10	-0.0675
23178	PASK || PAS domain containing serine/threonine kinase (1)	-1.24e-08	-1.12e-08	-0.38	0	0.141	-0.0515	-0.0685	0.23	-0.399	-0.207	0.2
23179	RGL1 || ral guanine nucleotide dissociation stimulator-like 1 (1)	-0.125	-0.455	0.125	0.505	0.383	-2.27e-08	0.063	0.015	0	0.0847	0.435
23181	C21orf106 || chromosome 21 open reading frame 106 (18)	1.38	-1.29	0.141	-0.141	0.332	-0.324	-0.201	0.015	0.629	0.843	-0.505
23184	MESDC2 || mesoderm development candidate 2 (1)	0.06	-0.19	-0.06	0.89	-0.075	-0.288	0.5	-0.185	0	0.417	0.104
23185	KIAA0217 || KIAA0217 (2)	-0.0425	-0.0525	0.0425	0.138	0.035	0.182	0.135	0.102	-0.51	-0.878	0.0275
23187	PHLDB1 || pleckstrin homology-like domain, family B, member 1 (1)	0.24	0.19	-0.19	-1.03	-7.45e-09	-0.383	0.16	-0.0725	0.7	-0.0683	-0.677
23189	ANKRD15 || ankyrin repeat domain 15 (2)	0.133	0.253	-0.247	-0.133	-0.02	-0.448	-0.135	-0.441	1.56	0.322	1.36
2319	FLOT2 || flotillin 2 (1)	0.275	0.035	-0.035	-0.125	-0.83	-0.823	4.77e-09	-0.28	0.58	0.0517	-0.577
23190	UBXD2 || UBX domain containing 2 (1)	1.86e-08	-0.21	0.23	0	0.15	-0.083	-0.84	0.02	0.16	-0.408	-0.02
23191	CYFIP1 || cytoplasmic FMR1 interacting protein 1 (1)	0.12	-0.12	-0.39	0.29	0.2	0.057	-0.18	0.17	0.45	-0.158	-0.716
23193	GANAB || glucosidase, alpha; neutral AB (1)	0.315	0.525	-0.315	-0.515	-0.422	0.165	0.508	-0.2	-0.0617	-7.75e-09	-0.93
23196	C9orf10 || chromosome 9 open reading frame 10 (2)	-0.06	-0.11	0.06	1.15	-0.405	-0.316	8.34e-09	-0.746	0.715	-0.123	0.807
23199	KIAA0182 || KIAA0182 protein (3)	0.395	0.205	-0.205	-0.48	0.54	1.31e-08	-0.294	-0.176	0.396	-0.365	-0.186
23201	KIAA0280 || KIAA0280 protein (2)	0.455	0.215	-0.595	-0.215	0.14	-0.273	-1.14	0.14	-0.355	-1.07	-0.461
23203	PMPCA || peptidase (mitochondrial processing) alpha (1)	-0.07	0.09	0.07	-0.08	0.03	-0.153	0.95	-0.11	-0.38	-0.568	0.11
23207	PLEKHM2 || pleckstrin homology domain containing, family M (with RUN domain) member 2 (3)	0.142	-0.0475	0.0475	-0.36	0.01	-0.073	0.78	0.09	-0.385	-0.0554	-1.49
23210	PTDSR || phosphatidylserine receptor (2)	1.39	0.16	-0.16	-0.74	0.023	5.96e-09	-0.077	-0.343	0.378	-0.685	-0.233
23211	C19orf7 || chromosome 19 open reading frame 7 (2)	0.677	0.578	-0.603	-0.578	0.165	-0.513	6.56e-09	0.725	-0.22	0.102	-0.3
23212	RRS1 || RRS1 ribosome biogenesis regulator homolog (S. cerevisiae) (1)	0.395	0.135	-0.135	-0.905	1.16	0.127	-1.04	0.472	4.84e-08	-2.34	-0.348
23214	XPO6 || exportin 6 (1)	-0.105	-0.045	0.045	0.275	-1.02	-0.753	0.1	-0.695	0	-0.178	-0.105
23215	BAT2D1 || BAT2 domain containing 1 (1)	-0.335	0.195	-0.195	0.845	0.298	0.685	0.498	-0.138	0.778	-2.32e-08	0.492
23216	TBC1D1 || TBC1 (tre-2/USP6, BUB2, cdc16) domain family, member 1 (1)	-0.03	0.03	0.1	-0.04	-0.2	-0.263	0.45	0.217	-0.03	0.0367	-0.217
23218	NBEAL2 || neurobeachin-like 2 (4)	0.045	0.07	-0.065	-0.045	0.345	0.392	1.26	0.0255	-0.052	-0.0934	-1.72
23219	FBXO28 || F-box protein 28 (1)	-0.015	-0.295	0.015	0.035	0.59	0.387	-0.07	-0.14	-0.05	0.272	0.14
23225	NUP210 || nucleoporin 210kDa (1)	0.255	-0.075	0.065	-0.065	0.31	-0.793	0.45	-0.568	0.43	0.232	1.26
23230	VPS13A || vacuolar protein sorting 13A (yeast) (4)	0.005	-0.005	-1.22	0.485	0.51	0.127	5.01e-08	0.575	0.6	-0.768	0.435
23231	KIAA0746 || KIAA0746 protein (1)	0.15	-0.17	-0.15	0.49	0.853	2.09e-09	0.053	-0.06	0.633	-0.675	0.06
23234	DNAJC9 || DnaJ (Hsp40) homolog, subfamily C, member 9 (2)	-0.145	0.035	0.425	-0.035	-0.6	0.552	0.1	0.0875	-1.14	-0.923	-0.0875
23239	PHLPP || PH domain and leucine rich repeat protein phosphatase (1)	0.375	0.035	-0.035	-0.525	0.103	3.58e-09	0.723	0.037	0	-0.215	-1.46
23240	KIAA0922 || KIAA0922 protein (1)	-0.215	-0.535	0.315	0.215	0.63	0.137	-0.62	-0.345	0.53	-1.49	-0.065
23246	BOP1 || block of proliferation 1 (4)	-0.031	0.031	0.188	-0.086	-0.277	-0.82	0.866	-0.903	-0.854	0.385	-3.32
23248	KIAA0460 || KIAA0460 (1)	0.705	0.415	-0.545	-0.415	0.06	-0.413	2.15e-08	1.08	0.03	-0.388	0.337
23252	KIAA0459 || KIAA0459 protein (1)	0.065	-0.075	0.225	-0.065	0.153	9.54e-09	0.723	0.582	-0.507	-0.445	-0.658
23254	KIAA1026 || kazrin (2)	0.0325	0.0275	-0.0275	-0.0875	2e-08	-0.158	1.09	-0.0225	-0.285	-0.283	-0.938
23256	SCFD1 || sec1 family domain containing 1 (2)	-0.512	-0.422	0.422	0.588	0.655	1.32	-0.55	0.955	1.34e-09	-0.248	0.545
23258	RAB6IP1 || RAB6 interacting protein 1 (1)	0.03	-0.04	-0.03	0.44	-0.04	-0.093	0.26	0.065	-0.35	-0.548	-0.565
23259	DDHD2 || DDHD domain containing 2 (1)	0.005	-0.065	-0.005	0.555	-0.06	0.667	-0.1	-0.375	0.35	-0.428	0.375
23261	CAMTA1 || calmodulin binding transcription activator 1 (3)	-0.12	0.01	-0.01	0.065	0.038	0.383	-0.584	0.297	-1.01	-1.5	2.23
23265	EXOC7 || exocyst complex component 7 (3)	0.43	0.43	-0.52	-0.43	0.246	-0.39	0.24	-0.105	-0.537	-0.425	-0.155
23266	LPHN2 || latrophilin 2 (1)	-0.2	0.2	-0.43	0.2	-0.075	0.102	-0.405	0.0975	2.27	0.667	1.45
23268	DNMBP || dynamin binding protein (1)	0.125	-0.535	-0.075	0.075	0.4	-0.093	0.29	-0.135	3.32	0.382	0.695
23269	MGA || MAX gene associated (1)	0.01	-0.35	-6.86e-09	0	0.46	-0.393	0.15	0.69	0.55	-0.448	-0.375
23270	TSPYL4 || TSPY-like 4 (1)	0.13	-0.1	-0.26	0.1	0.0384	-0.285	-0.642	-0.153	1.53	-8.94e-09	0.617
23274	KIAA0350 || KIAA0350 protein (2)	0.045	-0.045	-0.355	0.355	0.59	-0.483	1.63	0.565	2.13	-1.09	-0.645
23275	POFUT2 || protein O-fucosyltransferase 2 (1)	0.305	0.375	-0.415	-0.305	-0.27	-0.523	2.62e-08	0.105	0.4	0.492	-0.295
23279	NUP160 || nucleoporin 160kDa (2)	-0.372	-0.0975	0.0975	0.477	-0.395	0.012	-0.18	0.25	1.5e-08	0.00165	0.22
23291	FBXW11 || F-box and WD-40 domain protein 11 (1)	0.025	-0.025	-0.105	0.355	0.18	-0.253	-0.28	-0.0845	0.92	0.0617	0.726
23293	C17orf31 || chromosome 17 open reading frame 31 (1)	0.215	0.035	-0.035	-0.755	0.56	-0.043	1.16	0.08	-0.15	-0.138	-0.15
23295	MGRN1 || mahogunin, ring finger 1 (2)	0.13	0.275	-0.13	-0.17	0.105	-0.673	0.215	-0.42	-0.32	-0.103	-0.295
23299	BICD2 || bicaudal D homolog 2 (Drosophila) (2)	-0.05	0.05	-0.13	1.6	-0.103	0.103	-0.213	-0.64	0.117	0.178	0.08
23300	KIAA0431 || KIAA0431 protein (2)	-0.0525	0.0525	-0.652	0.233	0.065	0.027	-0.275	0.0625	0.93	0.472	1.59
23301	EHBP1 || EH domain binding protein 1 (1)	0.175	-0.005	0.005	-0.025	0.565	0.292	0.665	0.417	-0.495	-0.813	-0.343
23306	KIAA0286 || KIAA0286 protein (1)	0.025	-0.105	-0.025	0.595	-0.04	0.127	-0.35	-0.133	0.33	-0.658	0.327
23309	SIN3B || SIN3 homolog B, transcription regulator (yeast) (1)	0.41	0.1	-0.1	-0.46	0.465	-0.278	0.875	-0.358	0.525	-0.413	-0.408
23310	KIAA0056 || KIAA0056 protein (1)	-0.01	0.01	-0.08	0.11	0.4	0.167	-0.09	0.742	-0.17	-0.328	-0.228
23313	C22orf9 || chromosome 22 open reading frame 9 (2)	0.4	0.43	-0.46	-0.4	-2.53e-08	-0.693	-0.1	-0.172	1.16	0.0717	-0.128
23321	TRIM2 || tripartite motif-containing 2 (1)	-0.19	-0.66	0.24	0.19	1.16e-08	-0.313	-0.41	0.082	-0.47	-0.558	-0.128
23326	USP22 || ubiquitin specific protease 22 (2)	-0.0375	-0.168	0.0375	0.323	0.275	-0.258	0.49	-0.723	0.97	-0.668	-0.302
23335	WDR7 || WD repeat domain 7 (1)	-0.19	-0.38	0.54	0.19	0.604	0.271	-0.181	-0.166	-0.336	-0.0642	0.0095
23339	VPS39 || vacuolar protein sorting 39 (yeast) (1)	-0.12	0.12	-0.36	0.17	-0.23	-0.353	0.12	-0.015	-4.02e-09	-0.378	-0.675
23341	KIAA0962 || KIAA0962 protein (1)	0.38	0.12	-0.16	-0.12	0.351	0.0685	-0.399	-0.095	0.202	-0.407	0.095
23350	SR140 || U2-associated SR140 protein (1)	0.225	-0.035	-0.445	0.035	0.63	0.017	-0.07	0.145	0.95	-0.308	0.765
23351	KIAA0323 || KIAA0323 (1)	-0.11	-0.06	0.22	0.06	-0.29	0.277	0.35	0.275	0.83	-0.798	-0.605
23353	UNC84A || unc-84 homolog A (C. elegans) (1)	-0.155	0.155	-1.14	0.205	0.49	0.097	-1.03	-0.178	-0.25	-0.358	-0.428
23355	KIAA0804 || KIAA0804 (1)	-0.01	-0.21	0.01	0.19	0.3	0.087	0.22	0.052	-0.19	-0.648	-0.808
23358	USP24 || ubiquitin specific protease 24 (1)	0.105	-0.155	-0.105	0.285	0.433	1.79e-09	-0.707	0.07	0.093	-0.795	0.197
23360	FNBP4 || formin binding protein 4 (2)	-0.292	0.292	-0.482	0.463	-0.08	0.147	0.01	-0.15	0.265	-0.228	0.06
23373	MECT1 || mucoepidermoid carcinoma translocated 1 (2)	0.168	0.182	-0.168	-0.858	-0.458	-1.1	0.107	-0.089	-0.0283	0.0283	-0.963
23376	KIAA0776 || KIAA0776 (1)	0.065	-0.065	-0.435	0.365	0.5	0.057	-0.51	-0.1	0.29	-0.378	0.1
23378	KIAA0409 || KIAA0409 protein (2)	0.158	-0.138	-0.0525	0.0525	0.225	-0.078	-0.195	-0.703	0.16	-0.113	0.862
23379	KIAA0947 || KIAA0947 protein (2)	-0.085	-0.17	0.085	0.585	0.038	0	-0.127	0.082	0	0.16	1.21
23381	EST1B || Est1p-like protein B (1)	0.405	0.215	-0.215	-0.545	-0.06	-0.043	1.49	-0.015	-0.23	0.442	-1.34
23383	KIAA0892 || KIAA0892 (1)	-0.125	0.015	0.115	-0.015	0.04	-0.393	0.3	-0.09	-0.38	0.412	0.09
23386	NUDCD3 || NudC domain containing 3 (1)	0.06	-0.27	-0.06	0.19	-0.29	-0.493	0.12	-1.24	0.49	-0.318	0.12
23387	KIAA0999 || KIAA0999 protein (1)	0.115	-0.115	-0.175	0.195	-0.692	0.0654	0.488	0.01	-0.912	-2.38e-09	-0.54
23389	THRAP2 || thyroid hormone receptor associated protein 2 (2)	0.188	-0.0025	-1.31	0.0025	0.705	0.092	-0.675	0.755	-0.155	-1.31	-0.1
2339	FNTA || farnesyltransferase, CAAX box, alpha (2)	-0.258	-0.188	0.188	0.297	0.255	0.017	-0.45	0.205	-0.68	-1.41	-0.995
23392	KIAA0368 || KIAA0368 (2)	0.08	-0.08	-1.45	0.56	0.71	-0.303	-0.05	-0.17	0	-0.778	0.22
23394	ADNP || activity-dependent neuroprotector (2)	0.04	-0.04	-0.8	0.55	0.103	-5.96e-09	0.113	-0.05	-0.087	0.24	0.38
23395	LARS2 || leucyl-tRNA synthetase 2, mitochondrial (1)	9.09e-09	-0.22	0.24	0	-0.14	0.047	0.05	-0.265	-0.05	-0.368	-0.585
23396	PIP5K1C || phosphatidylinositol-4-phosphate 5-kinase, type I, gamma (1)	0.475	0.015	-0.015	-0.765	0.4	0.527	-0.2	-0.11	1.26	-0.498	-0.63
23397	BRRN1 || barren homolog (Drosophila) (1)	0.26	4.83e-08	-0.05	0	-0.07	0.147	-0.82	0.35	0.09	-0.558	0.62
23399	DULLARD || dullard homolog (Xenopus laevis) (2)	0.56	0.67	-0.56	-1.51	-1.33	-0.613	0.56	0.05	2.46e-08	0.832	-0.05
23400	ATP13A2 || ATPase type 13A2 (1)	-0.34	0.22	0.22	-0.22	-0.43	-0.433	0.65	0.0975	7.3e-09	-0.178	-1.74
23403	FBXO46 || F-box protein 46 (2)	0.22	0.13	-0.13	-0.575	-0.56	-0.328	0.18	-0.015	0.39	0.512	0.525
23404	EXOSC2 || exosome component 2 (1)	0.145	0.065	-0.065	-0.505	0.233	-2.98e-09	-1.01	0.17	0.033	-0.895	-0.03
23405	DICER1 || Dicer1, Dcr-1 homolog (Drosophila) (1)	-0.115	-0.645	0.115	0.445	0.528	0.532	0.0817	-0.029	0	-1.13e-08	0.511
23406	COTL1 || coactosin-like 1 (Dictyostelium) (1)	0.17	0.3	-0.17	-0.43	-0.492	-0.605	-0.0817	-0.21	0.958	1.64e-09	-0.01
23408	SIRT5 || sirtuin (silent mating type information regulation 2 homolog) 5 (S. cerevisiae) (2)	-0.04	-0.11	0.04	0.14	0.36	0.197	0.165	0.016	-0.13	-0.618	0.041
23409	SIRT4 || sirtuin (silent mating type information regulation 2 homolog) 4 (S. cerevisiae) (1)	-0.115	0.025	0.215	-0.025	-0.21	-0.103	-0.53	-0.143	0.96	1.56	1.59
23410	SIRT3 || sirtuin (silent mating type information regulation 2 homolog) 3 (S. cerevisiae) (2)	-0.17	0.17	0.22	-0.48	-0.19	-0.008	0.47	-0.237	-0.115	0.232	-0.388
23411	SIRT1 || sirtuin (silent mating type information regulation 2 homolog) 1 (S. cerevisiae) (1)	-0.025	0.025	-0.135	0.095	0.14	-0.293	-0.04	0.072	0.77	0.562	1.91
23412	COMMD3 || COMM domain containing 3 (1)	-0.085	0.085	0.245	-0.105	0.189	0.356	-0.341	0.165	-0.331	-0.189	0.195
23420	NOMO1 || NODAL modulator 1 (1)	0.04	-0.04	-0.47	0.19	-2.98e-10	-0.143	-0.51	-0.048	-0.33	-1.06	-0.128
23421	ITGB3BP || integrin beta 3 binding protein (beta3-endonexin) (3)	-0.385	0.035	-0.035	0.215	0.417	0.56	-1.14	0.418	-6.41e-09	-0.271	0.548
23423	TMED3 || transmembrane emp24 domain containing 3 (2)	0.21	0.175	-0.175	-0.415	-0.77	0.127	0.055	-0.0025	-0.585	0.327	-0.537
23432	GPR161 || G protein-coupled receptor 161 (3)	-0.01	0.307	0.01	-0.03	-0.15	-0.473	0.473	-0.533	-2.07e-08	0.0966	-0.227
23433	RHOQ || ras homolog gene family, member Q (2)	-0.465	-0.035	0.655	0.035	8.05e-09	0.452	-0.59	0.463	0.44	-0.0384	0.497
23435	TARDBP || TAR DNA binding protein (1)	-0.07	-0.48	0.07	1.09	-0.3	-0.023	-0.32	0.23	0.07	-0.378	-1.13e-08
23438	HARSL || histidyl-tRNA synthetase-like (1)	-0.165	0.245	0.025	-0.025	0.37	0.277	-0.33	0.505	-0.1	-0.468	-0.055
23446	CDW92 || CDW92 antigen (2)	-0.3	1.5e-08	0.715	0	-1.22e-08	-0.163	-0.15	-0.28	0	0.492	1.05
23450	SF3B3 || splicing factor 3b, subunit 3, 130kDa (1)	0.14	-0.15	2.98e-09	0	0.11	0.207	-7.15e-09	-0.013	-0.09	-0.798	-0.628
23457	ABCB9 || ATP-binding cassette, sub-family B (MDR/TAP), member 9 (1)	0.37	0.18	-0.18	-0.69	-0.035	-0.638	0.405	0.008	0.035	-0.538	-0.48
23463	ICMT || isoprenylcysteine carboxyl methyltransferase (2)	-0.045	0.045	0.815	-0.115	-0.325	-0.313	1.67e-08	0.0305	1.62	0.952	1.24
23469	PHF3 || PHD finger protein 3 (1)	2.82e-08	-0.19	0.31	0	0.343	2.74e-08	-0.257	0.725	-0.777	-0.705	-0.255
23471	TRAM1 || translocation associated membrane protein 1 (2)	-0.09	-0.06	0.71	0.06	5.66e-09	0.047	-0.53	0.323	-0.14	0.307	0.362
23474	ETHE1 || ethylmalonic encephalopathy 1 (1)	0.17	0.13	-0.13	-0.49	-0.67	-0.333	0.17	0.05	-0.32	0.0817	-0.05
23475	QPRT || quinolinate phosphoribosyltransferase (nicotinate-nucleotide pyrophosphorylase (carboxylating)) (1)	0.04	0.12	-0.04	-0.57	-0.01	-0.113	1.76	-0.035	-0.77	0.892	-1.23
23479	NIFUN || NifU-like N-terminal domain containing (2)	0.0725	0.177	-0.0725	-0.427	-0.2	0.387	-0.245	0.742	0.795	0.277	1.39
23480	SEC61G || Sec61 gamma subunit (1)	0.49	0.51	-0.49	-0.69	-0.17	0.357	1.19e-08	0.62	-0.11	0.892	-5.96e-10
23483	TGDS || TDP-glucose 4,6-dehydratase (2)	-0.782	-0.338	0.338	0.393	-0.29	0.527	-0.345	0.365	3.08	2.5	2.62
23484	LEPROTL1 || leptin receptor overlapping transcript-like 1 (2)	-0.22	-0.54	0.22	1.18	-0.207	2.98e-10	-0.097	-0.06	-0.687	0.345	0.07
23492	CBX7 || chromobox homolog 7 (1)	0.115	0.095	-0.095	-0.505	0.54	-0.073	0.23	-0.01	-1.36e-08	-1.24	0.09
23505	RW1 || RW1 protein (2)	0.0125	-0.0125	-0.147	0.0175	0.54	0.222	-0.135	-0.045	0.135	-0.283	0.05
23509	POFUT1 || protein O-fucosyltransferase 1 (2)	-0.688	-0.133	2.43	0.133	0.122	-0.166	-0.212	-0.332	1.06	0.244	0.134
23510	KCTD2 || potassium channel tetramerisation domain containing 2 (1)	-0.01	-8.87e-09	0.18	0	-0.322	-0.0447	-0.102	0.11	0.628	-1.85e-08	-0.11
23512	SUZ12 || suppressor of zeste 12 homolog (Drosophila) (1)	0.02	-0.02	-0.35	0.69	0.206	0.0827	-1.66	0.66	-0.444	-0.0827	0.04
23513	SCRIB || scribbled homolog (Drosophila) (1)	0.06	0.09	-0.06	-0.41	-9.84e-09	-0.143	0.84	0.0425	-0.35	-0.808	-2.14
23515	ZCWCC3 || zinc finger, CW type with coiled-coil domain 3 (1)	0.255	0.135	-0.235	-0.135	0.498	0.175	-0.972	0.675	0.128	-1.37e-08	0.755
23516	SLC39A14 || solute carrier family 39 (zinc transporter), member 14 (1)	-5.21e-09	0.1	-0.16	0	-0.05	0.107	-0.46	0.595	-0.08	-0.0583	0.135
23518	R3HDM || R3H domain (binds single-stranded nucleic acids) containing (1)	-0.08	0.08	-0.1	0.18	-0.335	-0.178	-3.28e-09	0.05	0.79	0.162	0.46
23522	MYST4 || MYST histone acetyltransferase (monocytic leukemia) 4 (1)	0.085	-0.235	-0.085	1.16	0.01	-0.543	0.11	0.115	2.94e-08	-0.438	0.325
23523	CABIN1 || calcineurin binding protein 1 (1)	0.81	0.65	-0.76	-0.65	0.04	-0.973	1.08	-0.1	0	-0.248	-1.71
23524	SRRM2 || serine/arginine repetitive matrix 2 (1)	0.145	0.055	-0.055	-0.455	-0.437	-4.17e-08	0.913	-0.11	-0.227	0.835	0.0325
23527	CENTB2 || centaurin, beta 2 (1)	-0.11	-0.16	0.11	0.55	0.214	0.151	-0.0658	-0.318	0	0.0658	0.602
23528	ZNF281 || zinc finger protein 281 (1)	-0.16	-0.31	0.16	1.01	-0.432	0.0853	-0.762	-0.005	0.0583	2.44e-08	0.475
23530	NNT || nicotinamide nucleotide transhydrogenase (2)	0.0025	-0.307	-0.0025	0.297	0.35	0.232	-0.31	0.018	-0.005	-0.558	-0.01
23531	MMD || monocyte to macrophage differentiation-associated (1)	-0.06	-0.47	0.08	0.06	-3.87e-09	-0.263	-0.73	-0.425	0.91	0.912	1.18
23532	PRAME || preferentially expressed antigen in melanoma (1)	0.1	0.03	-0.03	-0.3	-0.087	1.19e-09	-1.21	-0.375	0.323	-0.945	0.105
23534	TNPO3 || transportin 3 (1)	-0.33	-0.25	0.25	0.76	0.12	0.257	-0.63	-0.495	0.36	-1.46	-0.19
23543	RBM9 || RNA binding motif protein 9 (2)	0.335	-0.335	-0.925	0.895	-0.265	0.187	-0.493	0.057	-1.64e-09	-1.06	0.047
23552	CCRK || cell cycle related kinase (3)	-0.396	0.011	0.401	-0.011	-0.717	-1.19e-09	0.373	-0.312	-0.322	0.735	-0.495
23555	TSPAN15 || tetraspanin 15 (1)	-0.13	0.13	0.39	-0.65	-0.99	-0.243	1.67e-08	0.03	0.3	1.52	-0.5
23557	SNAPAP || SNAP-associated protein (1)	-0.035	0.035	0.245	-0.275	-0.14	0.277	0.02	-0.01	0.07	0.172	0.75
23558	WBP2 || WW domain binding protein 2 (2)	0.02	0.34	-0.02	-0.615	-0.187	-0.41	0.298	-0.595	-0.227	-8.94e-09	-2.04
23559	WBP1 || WW domain binding protein 1 (2)	0.175	0.275	-0.175	-0.765	-0.16	-0.563	0.595	-0.678	0.505	1.36	0.377
2356	FPGS || folylpolyglutamate synthase (4)	0.045	-0.045	0.045	-0.66	-0.157	-6.71e-10	1.1	-0.185	0.888	1.76	-0.283
23564	DDAH2 || dimethylarginine dimethylaminohydrolase 2 (1)	0.03	0.59	-0.03	-0.39	-0.15	0.007	0.16	0.2	0.39	-0.628	-0.22
23567	ZNF346 || zinc finger protein 346 (5)	-0.384	-0.248	0.604	0.248	-0.675	-0.038	0.02	-0.511	0.85	1.46	0.81
23582	CCNDBP1 || cyclin D-type binding-protein 1 (6)	-0.592	-0.262	0.569	0.262	-0.262	0.919	0.2	-0.0615	0.402	0.984	0.684
23583	SMUG1 || single-strand selective monofunctional uracil DNA glycosylase (3)	0.24	0.29	-0.24	-0.517	-0.515	-0.075	0.465	0.144	0.295	1.18	0.767
23585	SMP1 || small membrane protein 1 (1)	0.26	3.88e-08	-0.59	0	0.167	0.153	-1.89	0.18	-0.153	0.418	0.81
23587	DERP6 || S-phase 2 protein (4)	0.316	0.332	-0.316	-0.466	-0.8	-0.256	-0.025	0.187	-0.917	0.0736	-0.413
23588	KLHDC2 || kelch domain containing 2 (2)	-0.278	-0.113	0.468	0.113	-0.47	0.262	1.05	0.035	-2.83e-09	1.15	0.845
23589	CARHSP1 || calcium regulated heat stable protein 1, 24kDa (1)	0.3	0.32	-0.3	-0.79	-0.702	-0.105	0.638	-0.16	-0.792	-1.49e-10	-0.3
23590	TPRT || trans-prenyltransferase (2)	-0.37	-0.155	1.01	0.155	-0.22	0.282	0.045	0.338	0.505	1.07	1.39
23592	LEMD3 || LEM domain containing 3 (1)	-0.17	-0.12	0.12	0.21	0.223	-3.7e-08	-0.717	0.24	1.95	0.955	1.8
23593	HEBP2 || heme binding protein 2 (1)	0.39	0.29	-0.29	-0.7	0.6	0.277	-0.37	-0.18	2.46e-08	-0.258	0.18
23594	ORC6L || origin recognition complex, subunit 6 homolog-like (yeast) (1)	-0.16	0.16	-0.32	0.76	-0.11	-0.323	-2.13	-0.3	0.35	0.0216	0.3
23595	ORC3L || origin recognition complex, subunit 3-like (yeast) (3)	1.94e-09	-0.127	0.205	1.04e-09	0.857	0.627	5.24e-09	0.15	-0.063	-0.261	0.127
23598	ZNF278 || zinc finger protein 278 (4)	0.651	0.358	-0.358	-0.469	-0.245	-0.318	0.005	-0.209	1.03e-08	-0.483	-0.701
23603	CORO1C || coronin, actin binding protein, 1C (1)	0.055	-0.055	-0.245	0.745	-0.19	0.127	-1.09	1.13	-0.34	-0.998	-0.573
23607	CD2AP || CD2-associated protein (1)	-0.395	-0.525	0.395	0.625	-0.04	0.207	-0.57	0.195	1.4	0.862	1.48
23608	MKRN1 || makorin, ring finger protein, 1 (2)	0.045	-0.055	-0.045	0.265	0.073	2.03e-08	-0.137	0.417	-0.137	-0.93	-0.213
23609	MKRN2 || makorin, ring finger protein, 2 (2)	-0.217	-0.0975	0.0975	0.417	-2.98e-10	0.237	-0.53	0.455	-0.895	-0.273	-0.605
23612	PHLDA3 || pleckstrin homology-like domain, family A, member 3 (1)	-0.04	0.06	0.04	-0.97	0.118	-0.725	0.778	-0.25	-0.702	-2.56e-08	-0.09
23613	PRKCBP1 || protein kinase C binding protein 1 (3)	0.12	-0.12	-0.33	1.03	-0.14	0.682	0.14	-0.285	-0.19	-1.38	-0.775
23625	MTVR1 || Mouse Mammary Turmor Virus Receptor homolog 1 (1)	0.39	-0.13	0.13	-1.02	-0.19	-0.383	1.2	0.125	-0.16	0.482	-0.645
23633	KPNA6 || karyopherin alpha 6 (importin alpha 7) (2)	0.06	-0.41	2.53e-08	0	-0.42	-0.023	0.145	0.292	-5.81e-09	-0.198	-0.522
23635	SSBP2 || single-stranded DNA binding protein 2 (1)	-0.02	-0.22	0.03	0.02	0.0384	0.485	-0.262	0.77	0.328	-1.19e-09	0.18
23636	NUP62 || nucleoporin 62kDa (2)	0.185	0.015	-0.415	-0.015	-0.045	-0.093	-0.255	-0.253	1.13	0.737	1.11
23637	RABGAP1 || RAB GTPase activating protein 1 (2)	0.145	-0.51	-0.145	0.245	0.19	0.187	-0.058	0.742	1.29	-0.488	0.255
23640	HSPBP1 || hsp70-interacting protein (1)	0.14	0.12	-0.12	-0.6	-0.25	-0.403	1.34	-0.56	0	0.952	-0.97
23641	LDOC1 || leucine zipper, down-regulated in cancer 1 (1)	0.255	0.695	-0.305	-0.255	-0.502	0.325	0.228	0.035	-0.332	5.96e-10	-0.635
23644	RCD-8 || autoantigen (1)	0.285	0.195	-0.195	-1.11	0.08	-0.373	1.09	-0.163	-0.51	-0.0683	-0.253
23645	PPP1R15A || protein phosphatase 1, regulatory (inhibitor) subunit 15A (1)	0.28	0.09	-0.09	-0.18	-1.49e-09	-0.083	-0.45	0.06	0.22	1.14	-0.06
23646	PLD3 || phospholipase D family, member 3 (1)	0.16	0.58	-0.16	-0.78	-0.5	-0.353	0.56	-0.045	0.42	0.392	-1.19
23647	ARFIP2 || ADP-ribosylation factor interacting protein 2 (arfaptin 2) (1)	0.215	0.255	-0.245	-0.215	-0.16	-0.503	0.43	-0.53	-5.21e-09	0.462	-0.87
23649	POLA2 || polymerase (DNA directed), alpha 2 (70kD subunit) (1)	0.07	0.42	-0.07	-0.51	9.24e-09	-0.183	0.14	-0.268	-0.06	0.132	0.192
23654	PLXNB2 || plexin B2 (1)	0.245	-0.015	0.015	-0.995	0.34	-0.173	1.13	-0.273	1.22	1.02	-0.703
23658	LSM5 || LSM5 homolog, U6 small nuclear RNA associated (S. cerevisiae) (2)	0.17	0.25	-0.17	-0.36	0.26	0.437	-0.46	0.718	-0.11	0.272	0.278
23659	LYPLA3 || lysophospholipase 3 (lysosomal phospholipase A2) (1)	0.055	0.205	-0.055	-0.385	0.05	-0.423	0.69	-0.24	-0.23	-0.0984	-1.32
23660	ZFP95 || zinc finger protein 95 homolog (mouse) (1)	0.24	-0.07	-0.32	0.07	0.47	0.287	0.095	-0.221	0.35	-0.578	-0.31
23670	TMEM2 || transmembrane protein 2 (1)	-0.005	-0.275	0.025	0.005	0.56	0.277	-0.54	-0.11	0.6	-0.138	0.12
23673	STX12 || syntaxin 12 (1)	-0.175	-0.255	0.215	0.175	0.43	0.537	-0.46	0.71	-1.12e-08	-0.768	0.47
23677	SH3BP4 || SH3-domain binding protein 4 (1)	0.02	-0.12	2.09e-09	0	1.76e-08	-0.093	-0.36	0.24	0.73	0.172	0.85
23678	SGKL || serum/glucocorticoid regulated kinase-like (3)	-0.34	-0.26	0.26	1.14	1.83e-09	0.3	-0.817	-0.112	0.278	-0.205	0.967
23683	PRKD3 || protein kinase D3 (1)	0.03	-0.09	-0.03	0.19	-0.15	0.377	-0.16	-0.245	-4.02e-09	0.712	1.05
23710	GABARAPL1 || GABA(A) receptor-associated protein like 1 (1)	1.62e-08	0.1	-0.04	0	0.123	-1.79e-09	-0.622	-0.065	-0.337	-0.945	0.065
23729	CARKL || carbohydrate kinase-like (1)	0.1	-0.02	-0.25	0.02	-0.31	-0.693	0.14	-0.878	1.6	0.712	0.342
23741	CRI1 || CREBBP/EP300 inhibitor 1 (1)	0.065	-0.065	-0.525	0.195	0.01	0.037	-1.1	0.285	-0.96	-1.08	-0.435
23760	PITPNB || phosphatidylinositol transfer protein, beta (2)	-0.515	-0.165	0.165	0.815	-3.73e-10	0.302	-0.95	0.0795	0.025	-1.28	0.419
23761	PISD || phosphatidylserine decarboxylase (1)	-0.11	-0.18	0.11	0.16	2.71e-08	-0.193	-0.177	-0.347	-0.42	0.427	-0.37
23762	OSBP2 || oxysterol binding protein 2 (1)	0.45	0.26	-0.26	-0.43	0.651	-0.172	0.712	0.132	-0.709	-0.527	-1.11
23770	FKBP8 || FK506 binding protein 8, 38kDa (1)	0.21	0.52	-0.21	-0.91	-0.55	-0.373	1.15	-0.0225	-0.31	0.0717	-1.5
23779	ARHGAP8 || Rho GTPase activating protein 8 (2)	-0.0175	0.0175	0.398	-0.438	-0.43	-0.208	0.572	-0.0515	-0.94	0.0646	-0.325
23786	BCL2L13 || BCL2-like 13 (apoptosis facilitator) (2)	-0.172	-0.247	0.172	0.407	0.388	-4.17e-09	0.093	0.0075	-0.477	-0.0754	-0.598
23787	MTCH1 || mitochondrial carrier homolog 1 (C. elegans) (2)	-0.23	-0.01	0.32	0.01	-0.3	0.407	1.47	-0.22	-0.35	0.262	-0.243
23788	MTCH2 || mitochondrial carrier homolog 2 (C. elegans) (2)	-0.287	-0.627	0.792	0.287	0.105	-0.243	-0.54	0.265	-0.21	-0.828	0.285
24140	FTSJ1 || FtsJ homolog 1 (E. coli) (2)	-0.03	0.04	-0.035	0.03	-0.43	0.057	0.1	-0.132	1.61	1.28	0.721
24144	TFIP11 || tuftelin interacting protein 11 (1)	0.32	0.4	-0.32	-0.33	0.07	-0.103	0.37	0.005	-0.24	-0.418	-0.005
24146	CLDN15 || claudin 15 (4)	-0.05	0.64	0.05	-1.44	0.29	0.055	1.31	-0.163	-0.37	0.0617	-1.48
24147	FJX1 || four jointed box 1 (Drosophila) (1)	0.24	0.55	-0.24	-0.81	2e-08	-0.433	0.03	-0.853	-0.33	-0.898	-0.323
245908	DEFB105A || defensin, beta 105A (1)	-0.355	-0.165	0.165	0.225	0.0407	0.00768	0.261	0.135	0	-0.00768	-0.135
246184	CDC26 || cell division cycle 26 (1)	0.575	0.465	-0.465	-0.995	-0.07	0.977	0.04	-0.078	-0.4	-0.528	0.352
246243	RNASEH1 || ribonuclease H1 (2)	0.015	-0.015	-0.635	0.815	0.55	0.677	-0.5	-0.005	0.33	-0.798	0.955
246721	POLR2J2 || DNA directed RNA polymerase II polypeptide J-related gene (2)	0.245	0.18	-0.18	-0.235	-1.76	-0.996	0.0325	-0.547	0.688	0.779	-0.0425
2475	FRAP1 || FK506 binding protein 12-rapamycin associated protein 1 (1)	-0.03	0.04	-0.02	0.02	1.35	0.487	-0.18	0.05	-0.01	-0.408	0.19
2483	FRG1 || FSHD region gene 1 (1)	0.135	0.445	-0.135	-0.205	-0.17	0.152	-0.28	0.105	0.19	-0.558	0.185
2496	FTHL1 || ferritin, heavy polypeptide-like 1 (1)	-0.06	-0.15	0.3	0.06	-0.606	0.211	-0.0258	-0.78	-0.706	0.0258	0.22
2497	FTHL2 || ferritin, heavy polypeptide-like 2 (1)	-0.06	0.06	0.08	-0.3	-0.12	0.067	-0.47	0.032	-0.45	-0.968	0.402
25	ABL1 || v-abl Abelson murine leukemia viral oncogene homolog 1 (1)	0.505	0.025	-0.025	-0.605	-8.94e-10	-0.223	0.055	-0.209	0.04	0.162	-0.689
2501	FTHL8 || ferritin, heavy polypeptide-like 8 (1)	0.05	0.28	-0.3	-0.05	0.033	-4.77e-09	-0.557	-0.378	-0.447	-0.315	0.162
2509	FTHP1 || ferritin, heavy polypeptide pseudogene 1 (1)	0.065	0.475	-0.065	-0.105	-0.06	0.017	-0.58	-0.065	-0.56	-0.678	0.295
2516	NR5A1 || nuclear receptor subfamily 5, group A, member 1 (1)	1.94e-09	-0.23	0.19	0	-0.34	-0.193	0.54	-0.385	1.49e-10	0.372	-0.525
2517	FUCA1 || fucosidase, alpha-L- 1, tissue (1)	-0.13	-0.43	0.13	0.38	-6.26e-09	0.097	-0.64	0.44	0.2	0.212	0.92
252839	TMEM9 || transmembrane protein 9 (2)	-0.0525	0.0525	0.0525	-0.542	-0.3	0.027	0.82	-0.205	-0.385	0.607	0.554
252969	NEIL2 || nei like 2 (E. coli) (1)	0.115	0.195	-0.235	-0.115	-2.68e-09	-0.353	-0.14	-0.653	1.67	-0.148	2.06
2534	FYN || FYN oncogene related to SRC, FGR, YES (3)	-0.285	0.298	-0.165	0.165	-0.617	-0.036	-0.303	-0.005	0.48	-0.768	0.005
2535	FZD2 || frizzled homolog 2 (Drosophila) (1)	0.065	0.295	-0.065	-0.715	0.1	-0.363	0.96	0.015	-0.39	-0.0683	-0.705
253512	SLC25A30 || solute carrier family 25, member 30 (1)	0.06	-0.15	-0.06	0.36	-0.05	-0.183	-0.23	-0.833	2.99	1.15	2.3
253558	LYCAT || lysocardiolipin acyltransferase (1)	0.415	0.135	-0.135	-0.155	-0.12	-0.083	-0.56	0.147	1.57	1.14	2.69
253635	FLJ38348 || hypothetical protein FLJ38348 (1)	-0.08	0.08	-0.8	0.62	1.52e-08	0.087	-1.41	-0.108	0.23	-1.91	0.672
253639	ZNF620 || zinc finger protein 620 (1)	-0.3	-0.28	0.28	0.3	0.243	-6.56e-09	-0.727	0.277	0.283	-0.855	-0.003
253665	na || similar to Transcription elongation factor B polypeptide 2 (RNA polymerase II transcription factor SIII subunit B) (SIII p18) (Elongin B) (EloB) (Elongin 18 kDa subunit) (1)	0.565	0.265	-0.265	-0.785	-0.417	-4.17e-09	0.453	0.175	-1.22	-0.325	-0.455
2537	G1P3 || interferon, alpha-inducible protein (clone IFI-6-16) (1)	0.585	0.365	-0.365	-0.955	-0.86	0.137	0.4	0.197	0.08	0.692	-0.243
253725	FAM21C || family with sequence similarity 21, member C (2)	-0.03	0.03	-0.16	0.43	0.39	0.402	2.38e-09	0.547	-0.545	-0.843	-0.698
253738	EBF3 || early B-cell factor 3 (2)	-0.005	-0.05	0.005	0.205	-3.73e-10	0.097	-0.1	-0.11	0.755	-0.668	1.48
253832	ZDHHC20 || zinc finger, DHHC domain containing 20 (1)	-0.02	-0.31	0.02	0.16	0.41	-0.063	4.17e-09	-0.35	0.36	-0.163	0.74
2539	G6PD || glucose-6-phosphate dehydrogenase (1)	0.01	0.36	-0.01	-0.89	-0.462	-0.785	0.698	-0.645	0	4.17e-09	-2.66
253943	YTHDF3 || YTH domain family, member 3 (1)	-0.155	0.005	-0.005	0.055	-0.139	0.139	-0.339	1.05	0	0.313	0.395
253981	LOC253981 || hypothetical protein LOC253981 (1)	-0.17	-0.27	0.17	0.41	0.46	0.017	-0.43	-0.32	0.06	-0.588	0.75
254170	FBXO33 || F-box protein 33 (1)	-0.275	-0.225	0.225	0.225	0.083	-2.5e-08	-0.857	-0.35	0.463	-0.105	0.96
254225	KIAA1991 || hypothetical protein KIAA1991 (2)	0.345	-0.005	-0.145	0.005	-1.1e-08	0.047	0.225	0.187	-0.505	-0.743	-0.473
254295	PHYHD1 || phytanoyl-CoA dioxygenase domain containing 1 (2)	-0.0125	0.0125	0.0675	-0.453	-0.415	-0.118	0.53	-0.448	0.67	0.952	0.562
254359	ZDHHC24 || zinc finger, DHHC domain containing 24 (1)	0.26	0.05	-0.05	-0.65	-0.405	-0.308	1.53	0.03	-0.245	1.46	-0.28
254531	LOC254531 || PLSC domain containing protein (2)	0.265	0.695	-0.265	-0.415	-0.27	-0.733	0.3	-0.15	0.195	0.352	-0.585
254552	NUDT8 || nudix (nucleoside diphosphate linked moiety X)-type motif 8 (1)	0.08	0.1	-0.08	-0.91	-0.234	0.153	1.12	-0.36	-0.353	1.39	-0.23
2547	XRCC6 || X-ray repair complementing defective repair in Chinese hamster cells 6 (Ku autoantigen, 70kDa) (3)	-0.015	-0.305	0.345	0.015	0.0925	1.4	-0.282	0.252	-1	-0.981	0.342
254863	MGC40107 || hypothetical protein MGC40107 (1)	0.08	1.02e-08	-0.81	0	-1.13	-0.113	0.08	0.172	0.56	0.822	1.36
254887	ZDHHC23 || zinc finger, DHHC domain containing 23 (1)	0.16	-0.16	-0.19	0.39	0.23	0.127	-0.06	-0.073	0.95	-0.0883	0.907
2550	GABBR1 || gamma-aminobutyric acid (GABA) B receptor, 1 (2)	1.12	0.775	-0.775	-2.31	0.262	-0.121	0.426	-0.018	0.121	-0.557	-0.358
255231	MCOLN2 || mucolipin 2 (1)	0.25	-0.25	-0.44	0.34	-0.16	0.027	-1.91e-08	-0.205	0.24	-0.178	1.05
255252	FLJ36812 || hypothetical protein FLJ36812 (1)	0.1	-0.36	-8.94e-10	0	0.225	0.062	-0.045	0.195	0.045	0.197	0.655
2553	GABPB2 || GA binding protein transcription factor, beta subunit 2 (1)	0.17	-0.14	-0.09	0.09	-0.077	-1.31e-08	-0.077	0.34	0.763	0.445	0.99
255488	IBRDC2 || IBR domain containing 2 (1)	-0.06	-0.59	0.06	0.63	0.123	-9.54e-09	0.013	0.135	0	0.135	0.375
255520	ELMOD2 || ELMO domain containing 2 (1)	0.02	-0.38	1.34e-08	0	0.18	0.807	0	0.43	-0.82	-0.568	-0.43
255758	MGC33212 || hypothetical protein MGC33212 (1)	0.02	-0.02	-0.03	0.16	0.43	0.427	-0.44	0.512	-0.66	-0.248	-0.098
255783	LOC255783 || hypothetical protein LOC255783 (1)	0.29	0.21	-0.21	-1.49	-0.64	-0.093	0.92	0.38	0.33	1.6	-0.45
255919	FLJ38101 || hypothetical protein FLJ38101 (2)	-0.55	-0.21	0.26	0.21	-5.16e-08	0.347	-0.28	0.332	0.82	0.662	2.22
256306	DKFZp762H185 || hypothetical protein DKFZp762H185 (2)	-0.045	0.045	0.1	-0.65	-0.19	-0.303	0.15	-0.1	-1.36e-08	-0.888	-0.725
256364	EML3 || echinoderm microtubule associated protein like 3 (2)	0.185	0.075	-0.075	-0.51	-0.0416	-0.625	1.27	-0.365	-0.467	4.17e-09	-0.78
256435	ST6GALNAC3 || ST6 (alpha-N-acetyl-neuraminyl-2,3-beta-galactosyl-1,3)-N-acetylgalactosaminide alpha-2,6-sialyltransferase 3 (1)	-0.16	-0.18	0.34	0.16	-0.0735	0.0735	-1.25	0.26	1.01	0.0882	0.71
256714	FLJ14503 || hypothetical protein FLJ14503 (1)	0.37	-0.01	-5.57e-08	0	0.083	-1.55e-08	0.003	-0.0005	-0.537	-0.855	-0.365
256949	FLJ46061 || FLJ46061 protein (1)	-0.41	-1.36e-08	0.19	0	-0.095	-0.768	1.27	-0.608	-1.05	0.897	-0.558
257039	na || similar to ribosomal protein S17 (1)	-4.34e-08	0.11	-0.79	0	0.138	0.865	-0.992	-0.13	-1.37	-4.47e-08	-1.57
257054	MGC25181 || hypothetical protein MGC25181 (1)	-0.24	0.24	0.27	-1.22	0.48	-0.513	1.46	-0.435	-0.87	0.722	-0.325
2571	GAD1 || glutamate decarboxylase 1 (brain, 67kDa) (11)	-0.0215	-0.0615	0.0215	0.316	0.443	0	0.181	0.214	0.173	-0.965	-0.03
257160	DKFZp547C195 || hypothetical protein DKFZp547C195 (1)	0.265	0.045	-0.645	-0.045	4.47e-09	0.097	-1.38	0.125	0.22	-0.748	-0.345
25759	SHC2 || SHC (Src homology 2 domain containing) transforming protein 2 (2)	0.23	0.45	-0.23	-0.655	-0.126	-0.084	1.07	-0.177	0.084	1.75	-0.472
25764	HYPK || Huntingtin interacting protein K (1)	0.955	0.755	-0.845	-0.755	0.31	0.307	-0.05	0.71	0.19	-1.04	1.23
25771	TBC1D22A || TBC1 domain family, member 22A (1)	-1.64e-09	-5.22e-10	0.15	-0.19	0.01	-0.243	0.33	-0.23	-0.49	-0.468	0.21
25776	PGEA1 || PKD2 interactor, golgi and endoplasmic reticulum associated 1 (1)	-0.02	0.04	-0.62	0.02	2.09e-09	0.007	0.11	0.065	-0.27	-0.398	0.195
25782	RAB3-GAP150 || rab3 GTPase-activating protein, non-catalytic subunit (150kD) (1)	-4.34e-08	0.08	-0.26	0	0.525	0.412	-1.15	0.89	-0.005	0.0566	0.33
25791	NGEF || neuronal guanine nucleotide exchange factor (1)	0.29	0.26	-0.26	-1.12	-0.52	-0.433	0.55	0.145	0	-0.238	-1.51
25797	QPCT || glutaminyl-peptide cyclotransferase (glutaminyl cyclase) (2)	-0.588	-0.128	0.427	0.128	-2.77e-08	0.382	-0.465	0.198	0.69	0.642	1.47
25798	BRI3 || brain protein I3 (2)	0.105	0.255	-0.105	-0.525	2.47e-08	0.247	-0.51	0.065	-0.84	0.482	-0.065
25799	ZNF324 || zinc finger protein 324 (1)	0.265	0.455	-0.265	-0.285	0.01	-0.353	0.59	-0.155	1.15e-08	-0.0184	-1.06
2580	GAK || cyclin G associated kinase (1)	1.62e-08	0.12	-0.73	0	-0.35	-0.643	0.86	-0.418	-1.19	-0.728	-0.158
25800	SLC39A6 || solute carrier family 39 (zinc transporter), member 6 (1)	-0.33	-0.31	0.31	0.4	-0.02	0.077	-0.58	0.077	0.21	-0.858	0.077
25801	GCA || grancalcin, EF-hand calcium binding protein (2)	-0.25	-0.4	0.25	0.415	-0.287	0.335	-0.492	0.163	0	0.62	0.6
25805	BAMBI || BMP and activin membrane-bound inhibitor homolog (Xenopus laevis) (2)	0.115	-0.115	0.465	-0.315	-0.31	-0.053	2.38e-09	-0.795	0.12	-0.0583	0.26
25807	C22orf3 || chromosome 22 open reading frame 3 (1)	0.28	0.21	-0.21	-1.08	0.13	-0.143	1.5	0.12	1.94e-09	0.942	-1.13
25809	TTLL1 || tubulin tyrosine ligase-like family, member 1 (2)	0.045	0.335	-0.315	-0.045	0.133	-8.34e-09	-0.017	-0.233	0.908	-0.77	-0.632
25814	ATXN10 || ataxin 10 (2)	0.0175	-0.0175	0.223	-0.273	0.19	0.037	-0.555	0.005	-0.065	-0.243	-0.005
25819	CCRN4L || CCR4 carbon catabolite repression 4-like (S. cerevisiae) (1)	-0.135	0.025	-0.005	0.005	-0.47	-0.623	4.05e-08	-0.305	0.03	0.252	0.305
25820	ARIH1 || ariadne homolog, ubiquitin-conjugating enzyme E2 binding protein, 1 (Drosophila) (2)	-0.138	-0.627	0.138	0.943	0.797	0.451	-0.836	0.032	0.21	-0.631	0.455
25822	DNAJB5 || DnaJ (Hsp40) homolog, subfamily B, member 5 (1)	0.435	0.145	-0.315	-0.145	0.06	-0.303	0.49	0.617	-0.7	-0.198	-0.753
25824	PRDX5 || peroxiredoxin 5 (2)	0.312	0.598	-0.443	-0.312	-0.45	-0.048	0.495	0.06	-0.915	-0.328	-0.29
25825	BACE2 || beta-site APP-cleaving enzyme 2 (3)	-0.0585	0.0585	0.208	-0.118	-0.617	-0.18	-1.43e-08	0.165	1.09	0.862	1.09
25827	FBXL2 || F-box and leucine-rich repeat protein 2 (1)	-0.31	-0.43	0.31	0.57	-0.0508	0.116	-0.611	0.14	0.429	-0.0292	0.26
25828	TXN2 || thioredoxin 2 (1)	0.385	0.175	-0.175	-0.775	-0.24	-0.483	0.6	-1.19	0.57	0.642	0.102
25829	C22orf5 || chromosome 22 open reading frame 5 (1)	0.17	0.28	-0.17	-0.65	-1.34e-08	-0.653	-0.64	-0.205	0.59	0.412	-0.455
25830	SULT4A1 || sulfotransferase family 4A, member 1 (1)	0.12	-0.13	-0.12	0.17	0.445	0.567	0.19	0.102	-0.055	-0.433	-0.185
25831	HECTD1 || HECT domain containing 1 (1)	0.245	-0.005	0.005	-0.025	0.623	-1.49e-10	0.213	0.035	-0.287	-0.265	-0.035
25832	DJ328E19.C1.1 || hypothetical protein DJ328E19.C1.1 (1)	6.71e-09	-0.35	0.53	0	-1	0.937	-0.39	0.647	1.07	1.57	0.897
25839	COG4 || component of oligomeric golgi complex 4 (1)	0.02	4.84e-09	-0.19	0	-0.09	-0.253	0.29	-0.393	-0.08	0.272	-0.142
25841	ABTB2 || ankyrin repeat and BTB (POZ) domain containing 2 (1)	0.69	0.29	-0.29	-0.51	0.1	-0.283	1.19	-0.1	-1.3	-0.368	-0.59
25843	PREI3 || preimplantation protein 3 (3)	-0.645	-0.378	0.378	0.553	0.0614	0.513	-0.102	0.714	-0.529	-1.42e-08	0.234
25844	C6orf109 || chromosome 6 open reading frame 109 (2)	-0.045	0.125	0.045	-0.395	-0.512	-1.31e-08	0.663	0.12	-0.907	0.0246	-0.34
25845	DKFZP564I1171 || DKFZP564I1171 protein (2)	0.02	0.115	-0.02	-0.35	-1.19e-09	-0.528	-0.055	-0.392	2.17	1.76	2.11
2585	GALK2 || galactokinase 2 (2)	-0.4	0.155	-0.025	0.025	0.438	0.82	-0.112	0.779	0.0284	-1.19e-09	0.469
25852	ARMC8 || armadillo repeat containing 8 (12)	-0.55	-0.205	0.205	0.265	-0.21	0.287	-0.27	0.05	0.54	0.402	1.86
25855	BRMS1 || breast cancer metastasis suppressor 1 (2)	0.045	-0.045	-1.05	0.205	-0.437	2.5e-08	0.558	0.245	-1.08	-0.0353	-0.425
25861	DFNB31 || deafness, autosomal recessive 31 (1)	0.245	0.395	-0.245	-0.965	0.33	-0.603	0.74	0.15	-0.33	-0.128	-0.15
25864	ABHD14A || abhydrolase domain containing 14A (1)	0.32	0.22	-0.22	-0.72	-0.55	-0.643	0.55	-0.163	-0.37	0.422	0.307
25865	PRKD2 || protein kinase D2 (1)	0.27	0.33	-0.27	-0.54	-0.06	-0.173	0.98	0.335	1.04e-09	-0.0883	-0.425
25869	DKFZP564M1416 || DKFZP564M1416 protein (1)	-0.445	-0.145	0.145	0.685	0.02	0.037	-0.48	0.475	1.02	0.132	1.26
25870	SUMF2 || sulfatase modifying factor 2 (2)	-0.593	0.102	0.517	-0.102	-0.443	0.184	1.17	0.542	0	0.269	-1.01
25871	C3orf17 || chromosome 3 open reading frame 17 (2)	-0.168	-0.472	0.198	0.168	0.513	-2.74e-08	-0.132	-0.12	0.613	0.485	1.21
25873	RPL36 || ribosomal protein L36 (3)	0.22	0.33	-0.22	-0.94	-0.64	0.087	0.207	0.196	-1.18	-0.928	-0.671
25874	BRP44 || brain protein 44 (2)	0.0225	0.0875	-0.0225	-0.512	0.27	0.437	-0.115	0.512	-0.765	-0.0284	0.268
25875	LETMD1 || LETM1 domain containing 1 (1)	0.06	-0.05	0.05	-0.52	-0.15	0.017	0	0.28	-0.02	0.572	0.39
25879	WDSOF1 || WD repeats and SOF1 domain containing (1)	0.135	0.275	-0.135	-0.355	0.19	0.577	-0.79	0.0275	-0.29	-0.368	0.247
25880	C16orf51 || chromosome 16 open reading frame 51 (1)	0.255	0.105	-0.105	-0.945	0.33	0.727	-1.19e-08	-0.503	1.22	-0.298	0.687
25885	POLR1A || polymerase (RNA) I polypeptide A, 194kDa (1)	0.4	0.04	-0.04	-0.44	0.6	-0.163	1.04	0.412	-0.51	-0.628	-0.308
25886	WDR51A || WD repeat domain 51A (2)	0.27	0.35	-0.38	-0.27	-0.372	5.96e-09	0.363	-0.148	0.988	1.15	0.942
25888	ZNF473 || zinc finger protein 473 (2)	-0.155	-0.165	0.155	0.525	-1.82e-08	0.107	-0.3	-1.22	0.73	0.202	-0.125
25896	C1orf73 || chromosome 1 open reading frame 73 (1)	-0.23	-0.33	0.23	0.56	0.0142	0.201	0.584	-0.043	-0.736	-0.0142	-0.133
25898	RCHY1 || ring finger and CHY zinc finger domain containing 1 (3)	-0.0115	-0.172	0.0585	0.0115	4.86e-08	0.367	-0.29	0.4	-0.333	0.0216	0.87
2590	GALNT2 || UDP-N-acetyl-alpha-D-galactosamine:polypeptide N-acetylgalactosaminyltransferase 2 (GalNAc-T2) (1)	0.45	0.05	-0.05	-0.21	0.13	-0.213	-0.07	0.147	0.45	-0.0583	-0.243
25900	HOM-TES-103 || HOM-TES-103 tumor antigen-like (2)	0.0625	0.107	-0.0625	-0.682	-0.2	-0.358	0.945	-0.205	-0.205	0.382	-0.37
25901	C6orf80 || chromosome 6 open reading frame 80 (1)	-0.145	-0.235	0.405	0.145	-0.12	0.517	-0.43	-1.51	0.72	0.442	0.624
25902	MTHFD1L || methylenetetrahydrofolate dehydrogenase (NADP+ dependent) 1-like (1)	0.02	-0.02	-0.29	0.6	0.283	-4.17e-09	0.283	-0.065	-0.397	-0.465	0.065
25904	CNOT10 || CCR4-NOT transcription complex, subunit 10 (1)	-0.355	-0.245	0.245	0.445	-0.04	0.137	-0.27	0.407	0.05	-0.698	-0.203
25906	DKFZP564M082 || DKFZP564M082 protein (2)	0.372	0.383	-0.762	-0.372	-0.23	0.247	-0.225	0.133	0.325	-0.873	-0.583
25907	RIS1 || Ras-induced senescence 1 (1)	0.015	0.355	-0.295	-0.015	-0.085	-0.278	0.445	0.185	0.035	1.01	-0.185
25909	ELYS || ELYS transcription factor-like protein TMBS62 (1)	0.4	-0.4	-0.8	0.63	1.1	0.463	-0.787	-0.06	0.813	0.344	0.06
25911	RP11-529I10.4 || deleted in a mouse model of primary ciliary dyskinesia (2)	0.443	0.282	-0.282	-0.302	-0.25	0.167	0.325	-0.3	-0.505	-0.588	-0.115
25912	C1orf43 || chromosome 1 open reading frame 43 (2)	-0.23	0.1	0.1	-0.1	-0.43	0.727	3.58e-08	0.51	-0.58	0.682	-0.35
25914	RTTN || rotatin (1)	0.105	-0.105	-0.135	0.845	0.224	0.701	-0.176	0.567	0	-0.00417	-0.483
25917	THUMPD3 || THUMP domain containing 3 (1)	-0.02	-0.06	0.02	0.69	0.22	0.307	-0.47	0.12	0.14	-0.508	0.37
2592	GALT || galactose-1-phosphate uridylyltransferase (2)	0.195	-0.08	0.08	-0.265	0.063	-0.02	6.68e-09	0.0115	-0.552	-0.5	-0.748
25920	COBRA1 || cofactor of BRCA1 (1)	-0.18	0.36	-0.18	0.18	-0.344	-0.206	1.94	0.31	-0.913	1.16	-1.36
25921	ZDHHC5 || zinc finger, DHHC domain containing 5 (1)	0.285	0.255	-0.255	-1.49	0.32	-0.013	-0.62	0.477	0.05	-0.898	-0.893
25923	DKFZP564J0863 || DKFZP564J0863 protein (3)	-0.0275	-0.578	0.163	0.0275	-0.418	-0.153	-0.298	-0.03	0.885	0.527	0.637
259230	TMEM23 || transmembrane protein 23 (1)	-0.245	0.115	-0.115	0.505	0.203	8.34e-09	-0.787	0.595	0	-0.235	1.15
25925	ZNF521 || zinc finger protein 521 (1)	-0.02	0.02	-0.23	0.65	0.103	-3.28e-09	-0.137	-0.015	0	-0.355	0.015
25926	DKFZP586L0724 || DKFZP586L0724 protein (3)	-0.307	-0.01	0.01	0.483	1.21e-08	0.754	-0.156	0.075	-0.008	0.0157	0.805
25927	C2orf32 || chromosome 2 open reading frame 32 (1)	0.005	0.205	-0.005	-0.505	-0.29	-0.333	-0.5	0.04	-0.17	0.322	-0.17
2593	GAMT || guanidinoacetate N-methyltransferase (3)	0.24	-0.08	0.08	-0.63	-0.548	-0.511	1.23	0.338	0.547	1.53	-0.338
25932	CLIC4 || chloride intracellular channel 4 (2)	-0.302	-0.362	0.302	1.19	0.065	0.502	-0.565	-0.0575	0.055	-0.373	0.0575
25936	C1orf48 || chromosome 1 open reading frame 48 (2)	-1.16	-0.228	0.407	0.228	0.14	0.697	-4.17e-09	0.595	-0.405	-0.278	0.28
25938	C14orf125 || chromosome 14 open reading frame 125 (2)	-0.675	-0.095	0.095	0.62	-8.94e-10	0.032	-0.3	0.355	1.13	0.487	1.72
25940	DKFZP564F0522 || DKFZP564F0522 protein (1)	-0.22	-0.25	0.22	0.62	0.34	0.297	-1.29	0.535	-0.06	-0.498	0.245
25941	C18orf10 || chromosome 18 open reading frame 10 (2)	-0.0125	0.0125	0.407	-0.207	-1.05	0.257	4.05e-08	0.275	-0.72	0.142	-0.275
25945	PVRL3 || poliovirus receptor-related 3 (1)	-0.19	-0.31	0.19	0.71	0.0384	0.485	-0.367	0.502	0	2.44e-08	0.652
25946	ZNF385 || zinc finger protein 385 (1)	-0.165	0.165	0.435	-0.815	-0.2	-0.493	0.4	0.055	-0.11	-0.488	-0.795
25948	KBTBD2 || kelch repeat and BTB (POZ) domain containing 2 (1)	-0.005	-0.055	0.455	0.005	0.46	0.257	-0.34	0.115	0.15	-0.188	0.605
25949	CBPIN || CCNDBP1 interactor (2)	0.115	0.085	-0.395	-0.085	0.18	0.392	-1.82	0.432	0.315	-1.11	1.04
25950	RWDD3 || RWD domain containing 3 (1)	-0.1	0.1	0.28	-0.44	0.479	0.556	-0.411	0.695	0	-0.309	0.365
25953	MR-1 || myofibrillogenesis regulator 1 (2)	0.0725	-0.0675	0.0675	-0.458	-0.785	-1.02	-0.185	-0.385	0.16	-0.75	-0.56
25956	SEC31L2 || SEC31-like 2 (S. cerevisiae) (2)	-0.02	0.02	-0.19	2.45	0.125	0.252	0.825	-0.065	-1	-0.543	-0.525
25961	NUDT13 || nudix (nucleoside diphosphate linked moiety X)-type motif 13 (1)	0.03	-0.03	0.04	-0.06	-0.33	-0.033	-0.03	0.17	0.53	1.52	0.92
25962	DKFZP434I116 || DKFZP434I116 protein (10)	-0.44	-0.3	0.3	0.614	0.409	0.872	-0.134	0.587	-2.6e-08	-0.42	0.102
25963	DKFZP564G2022 || DKFZP564G2022 protein (2)	-0.578	-0.522	0.522	0.693	0.39	0.527	-0.67	0.3	1.03e-08	-0.478	0.45
2597	GAPDH || glyceraldehyde-3-phosphate dehydrogenase (7)	-0.0145	0.0145	0.357	-0.358	-1.4	0.01	0.093	-0.1	0	-0.278	-0.49
25970	SH2B || SH2-B homolog (2)	0.122	0.333	-0.122	-0.938	0.12	-0.228	1	-0.22	-0.415	-0.0634	-1.61
25973	DKFZp727A071 || similar to tRNA synthetase class II (1)	0.25	0.03	-0.13	-0.03	4.38e-08	-0.273	0.3	-0.35	-0.12	-0.388	0.25
25974	DKFZp564I122 || DKFZp564I122 protein (1)	0.215	-0.185	0.045	-0.045	-0.547	-3.35e-10	-0.137	0.145	-0.997	-0.365	-0.235
25977	NECAP1 || adaptin-ear-binding coat-associated protein 1 (3)	-0.39	-0.726	0.39	0.447	0.048	1.19e-09	-0.122	-0.165	0.428	-0.25	0.325
25978	CHMP2B || chromatin modifying protein 2B (1)	-0.09	-0.15	0.09	0.37	0.77	0.507	-0.21	0.175	0.22	0.702	0.275
25979	DKFZp566O084 || DKFZP566O084 protein (1)	0.09	-0.09	0.22	-0.29	-0.49	0.127	-0.15	0.125	0.47	0.592	0.805
25980	C20orf4 || chromosome 20 open reading frame 4 (1)	-0.06	3.88e-08	0.22	0	-0.86	-0.903	5.96e-08	-0.57	0.46	0.632	0.06
25987	TSK || tsukushi (1)	0.13	0.28	-0.13	-0.72	-0.79	-0.503	3.1e-08	-0.49	0.91	0.722	0.35
25989	ULK3 || unc-51-like kinase 3 (C. elegans) (1)	-0.24	0.18	0.28	-0.18	0.43	-0.213	1.14	-0.888	-0.02	0.452	0.422
25994	HIG1 || likely ortholog of mouse hypoxia induced gene 1 (1)	-0.145	0.145	0.265	-0.215	0.85	0.677	-1.86e-10	0.72	-0.33	-0.328	2.44e-08
26001	RNF167 || ring finger protein 167 (3)	0.095	0.315	-0.095	-0.755	-1.1	-0.096	0.21	-0.23	0.02	1.21	-0.84
26002	MOXD1 || monooxygenase, DBH-like 1 (1)	-0.19	-0.23	0.19	0.21	-5.22e-10	0.367	-0.07	0.022	-0.18	-1.29	-1.09
26003	GORASP2 || golgi reassembly stacking protein 2, 55kDa (2)	-0.497	-0.718	0.497	0.618	-0.22	0.047	4.05e-08	0.337	0.62	0.242	-1.17
26007	DKFZP586B1621 || DKFZP586B1621 protein (1)	0.095	0.155	-0.095	-0.945	-0.492	-0.675	0.728	0.045	-0.532	-6.56e-09	-1.5
26009	ZZZ3 || zinc finger, ZZ domain containing 3 (1)	0.11	-0.22	-0.11	0.31	0.07	0.032	1.19e-08	0.026	0.2	0.392	-0.261
26010	DNAPTP6 || DNA polymerase-transactivated protein 6 (1)	0.04	0.08	-0.04	-0.12	0.38	0.317	-0.21	-0.075	-0.24	-0.708	0.055
26012	NELF || nasal embryonic LHRH factor (2)	-0.06	0.325	0.06	-1.25	0.052	-0.531	0.889	-0.254	-0.768	-0.196	-2.38
26017	FAM32A || family with sequence similarity 32, member A (1)	0.585	0.345	-0.345	-0.705	0.42	0.437	-0.72	0.08	-0.18	-1.61	5.36e-09
26018	LRIG1 || leucine-rich repeats and immunoglobulin-like domains 1 (1)	0.145	-0.015	0.015	-0.145	-2.98e-10	-0.143	-0.28	0.39	0.93	-0.568	1.15
26019	UPF2 || UPF2 regulator of nonsense transcripts homolog (yeast) (1)	0.055	-0.185	-0.055	0.155	0.258	-2.03e-08	1.13	-0.29	0.333	-0.965	-0.08
26022	DKFZP564K1964 || DKFZP564K1964 protein (2)	0.055	-0.055	0.095	-0.775	-0.492	-4.77e-09	0.863	0.2	-0.052	1.11	0.16
260294	WBSCR20C || Williams Beuren syndrome chromosome region 20C (2)	0.0225	0.102	-0.0225	-0.263	-0.04	0.217	0.317	0.025	-2.37	-0.318	-0.025
26033	ATRNL1 || attractin-like 1 (1)	-0.095	0.095	0.145	-0.175	0.443	-1.07e-08	0.243	0.882	-0.667	-0.0754	-0.428
26035	GLCE || glucuronyl C5-epimerase (1)	-1.24e-08	-0.16	0.43	0	-0.18	-0.333	-0.35	-0.035	0.85	0.472	1.42
26037	SIPA1L1 || signal-induced proliferation-associated 1 like 1 (1)	0.175	-0.175	-0.235	0.385	0.22	-0.173	0.32	-0.145	0.32	-0.548	-0.965
26039	SS18L1 || synovial sarcoma translocation gene on chromosome 18-like 1 (1)	-0.095	-0.375	0.215	0.095	0.345	-0.098	0.435	0.215	0.115	-0.263	0.345
26046	ZNF294 || zinc finger protein 294 (1)	-0.055	-0.315	0.055	0.305	0.102	0.0985	-0.298	1.07	-0.0985	0.343	0.49
26048	ZNF500 || zinc finger protein 500 (1)	0.155	0.305	-0.155	-0.185	-0.145	-0.448	0.685	0.182	-0.295	0.242	-0.558
26049	KIAA0888 || KIAA0888 protein (1)	0.29	0.01	-0.03	-0.01	0.605	0.442	-0.37	1.26	-0.265	0.207	0.0175
26053	AUTS2 || autism susceptibility candidate 2 (1)	0.22	0.33	-0.67	-0.22	0.41	-0.013	-0.7	0.112	0.66	-0.508	0.922
26054	SENP6 || SUMO1/sentrin specific protease 6 (2)	-0.0925	-0.193	0.0925	0.752	0.848	1.79e-09	0.163	0.119	0.698	-0.89	0.44
26056	RAB11FIP5 || RAB11 family interacting protein 5 (class I) (1)	-0.055	-0.195	0.055	0.125	-0.642	-0.905	-0.402	-1.12	1.01	7.75e-09	0.897
26058	TNRC15 || trinucleotide repeat containing 15 (1)	0.34	0.13	-0.13	-0.28	0.433	2.09e-09	0.513	0.132	0.023	-0.855	-0.078
26061	HPCL2 || 2-hydroxyphytanoyl-CoA lyase (4)	-0.829	-0.481	0.722	0.481	2.66e-08	0.96	0.523	0.0685	-0.377	0.605	0.336
26064	RAI14 || retinoic acid induced 14 (1)	0.06	-0.32	-0.04	0.04	-0.25	1.55	-0.64	-0.298	-4.02e-09	-0.958	-0.228
26065	FAM61A || family with sequence similarity 61, member A (2)	-0.26	0.505	-0.11	0.11	0.628	0.569	-1.21	0.313	5.51e-09	-1.03	-0.313
26084	SGEF || Src homology 3 domain-containing guanine nucleotide exchange factor (1)	-0.25	-0.33	0.26	0.25	0.05	0.347	-0.32	-0.773	0.45	0.0617	0.487
26090	C20orf22 || chromosome 20 open reading frame 22 (1)	-0.37	3.05e-09	0.03	0	0.06	0.017	-0.39	0.147	-0.75	-0.0284	0.457
26091	HERC4 || hect domain and RLD 4 (1)	-0.06	0.06	-0.4	0.67	0.696	0.113	0.166	0.09	-0.334	-0.113	-0.06
26092	LAP1B || lamina-associated polypeptide 1B (1)	-0.12	-0.24	0.12	0.22	-0.15	-0.283	0.1	0.375	-0.45	0.0117	0.175
26097	C1orf77 || chromosome 1 open reading frame 77 (1)	-0.01	0.65	0.01	-3.35	0.104	0.431	-0.126	0.51	0	-0.104	0.2
26099	DKFZp566C0424 || putative MAPK activating protein PM20,PM21 (2)	-0.03	0.03	0.05	-0.235	-4.47e-09	-0.173	0.17	0.055	-0.34	-0.388	-0.87
26100	WIPI-2 || WIPI49-like protein 2 (3)	-0.191	-0.0984	0.512	0.0984	-0.0617	0.279	0.623	-0.292	-0.379	1.19e-09	-0.275
26115	DKFZP564D166 || putative ankyrin-repeat containing protein (1)	0.06	2.46e-09	-0.12	0	-6.86e-09	0.147	0.13	0.07	-0.51	-0.438	0.115
26118	WSB1 || WD repeat and SOCS box-containing 1 (2)	0.445	0.155	-1.43	-0.155	0.0984	-0.0946	-0.492	1.09	1.17	-6.56e-09	2.29
26119	LDLRAP1 || low density lipoprotein receptor adaptor protein 1 (2)	-0.448	-0.128	0.128	0.482	5.66e-09	-0.583	0.23	-0.731	1.57	0.662	0.865
26121	PRPF31 || PRP31 pre-mRNA processing factor 31 homolog (yeast) (1)	0.465	0.415	-0.415	-0.955	0.28	-0.203	-0.07	-0.545	-0.14	-0.338	-0.715
26122	EPC2 || enhancer of polycomb homolog 2 (Drosophila) (1)	-0.095	-0.145	0.095	0.775	0.51	0.577	-0.36	0.405	-0.49	0.0517	0.175
26123	C10orf61 || chromosome 10 open reading frame 61 (1)	-0.005	0.055	0.005	-0.355	-0.21	-0.383	-0.14	-0.318	0.52	0.132	-0.213
26127	FGFR1OP2 || FGFR1 oncogene partner 2 (1)	-0.005	0.165	-0.305	0.005	0.72	0.627	-0.74	0.0925	-6.41e-09	-1.21	0.502
26130	GAPVD1 || GTPase activating protein and VPS9 domains 1 (1)	0.135	-0.055	-0.395	0.055	0.278	0.644	0.328	0.57	0	-0.181	0.0995
26133	TRPC4AP || transient receptor potential cation channel, subfamily C, member 4 associated protein (1)	0.17	-0.18	-1.28e-08	-1.57e-08	0.03	-0.183	0.49	-0.39	-0.01	-0.158	-1.01
26145	IRF2BP1 || interferon regulatory factor 2 binding protein 1 (1)	0.225	0.175	-0.175	-0.625	-0.0916	-0.335	1.39	0.03	-0.592	5.36e-09	-1.64
26146	TRAF3IP1 || TNF receptor-associated factor 3 interacting protein 1 (1)	0.055	-0.335	-0.055	0.405	0.48	0.137	-1.43e-08	0.605	-0.13	-0.468	-0.005
26147	PHF19 || PHD finger protein 19 (1)	0.185	0.115	-0.115	-0.505	-0.02	-0.713	0.55	-0.593	1.27	0.732	0.657
26149	ZNF658 || zinc finger protein 658 (1)	-0.21	-0.05	0.05	0.13	0.9	0.197	-2.38e-09	0.065	0.77	-0.108	-0.065
26151	NAT9 || N-acetyltransferase 9 (1)	-1.95e-08	0.04	-0.18	0	-0.07	-0.393	0.57	-0.138	-0.84	0.0117	0.032
26152	ZNF337 || zinc finger protein 337 (2)	-0.27	-0.16	0.16	0.75	-8.64e-09	0.517	-0.205	-0.055	0.57	-0.218	-0.415
26153	KIF26A || kinesin family member 26A (1)	5.51e-09	0.06	-0.23	0	0.76	-0.423	0.18	0.0045	0	-0.728	-0.415
26155	DKFZP564C186 || DKFZP564C186 protein (2)	0.463	0.532	-0.463	-0.772	2.47e-08	-0.273	0.93	0.06	-1.31	0.112	-0.865
[truncated: 6,788 more rows]

## Sheet: Ago2miR124_vs_Ago2_IP_SAM_out
refseq	entrez_id	description	sam_score	sam_numerator	sam_denominator	fold_change	fdr	local_fdr	X3UTR_6mer_n2_7	X3UTR_6mer_n3_8	X3UTR_7merm8	X3UTR_7merA1	X3UTR_8mer	targetscan3.0	pictar5way	miranda	lim_expression	targetscan4.0_conserved	targetscan4.0_nonconserved	targetscan4.0_cum_cs	PITA_315	ORFn2_7	ORFn3_8	ORF_7merm8	ORF_7merA1	ORF_8mer	X5UTRn2_7	X5UTRn3_8	X5UTR_7merm8	X5UTR_7merA1	X5UTR_8mer	X3UTR_hs_s7merA1	X3UTR_con_s7merA1	X3UTR_hs_s7merm8	X3UTR_con_s7merm8	ORF_hs_s7merA1	ORF_con_s7merA1	ORF_hs_s7merm8	ORF_con_s7merm8
NM_002306	3958	LGALS3 || lectin, galactoside-binding, soluble, 3 (galectin 3) (1)	5.89757	2.87225	0.487022	7.32402	0	0	0	0	0	0	0	0	0	0	0	0	0	NA	NA	3	2	1	1	1	0	0	0	0	0	0	0	0	0	1	0	1	0
NA	10301	DLEU1 || deleted in lymphocytic leukemia, 1 (1)	5.3371	3.74487	0.701668	13.8651	0	0	NA	NA	NA	NA	NA	0	0	0	0	0	0	NA	NA	NA	NA	NA	NA	NA	NA	NA	NA	NA	NA	NA	NA	NA	NA	NA	NA	NA	NA
NM_018845	55974	LOC55974 || stromal cell protein (1)	4.95515	2.99797	0.605022	8.14405	0	0	3	0	0	3	0	0	0	0	0	0	1	-0.4435	-17.89	0	1	0	0	0	0	0	0	3	3	3	0	0	0	0	0	0	0
NM_003641	8519	IFITM1 || interferon induced transmembrane protein 1 (9-27) (1)	4.84054	3.22799	0.666865	9.63342	0	0	0	0	0	0	0	0	0	0	0	0	0	NA	NA	0	1	0	0	0	0	0	0	0	0	0	0	0	0	0	0	0	0
NM_006016	8763	CD164 || CD164 antigen, sialomucin (1)	4.78432	2.60494	0.544474	6.17616	0	0.000120484	3	2	2	2	2	1	0	1	1	1	0	-0.7756	-22.75	0	0	0	0	0	0	0	0	2	3	2	2	2	2	0	0	0	0
NM_020188	56942	DC13 || DC13 protein (3)	4.73193	2.517	0.531918	5.68953	0	0.0021137	1	0	0	0	0	0	0	0	0	0	0	NA	-17.93	0	0	0	0	0	0	0	0	0	1	0	0	0	0	0	0	0	0
NM_004099	2040	STOM || stomatin (4)	4.64565	2.9145	0.627362	7.59622	0	0.00632783	2	1	1	1	1	0	0	0	1	0	1	-0.3676	-19.57	0	0	0	0	0	0	0	0	1	2	1	0	1	0	0	0	0	0
NM_016946	50848	F11R || F11 receptor (2)	4.55551	2.53254	0.555929	5.94319	0	0.0121296	3	3	0	2	0	1	0	0	1	1	1	-0.1618	-22.52	1	4	1	0	0	0	0	0	2	3	2	1	0	0	0	0	1	0
NM_022044	23753	SDF2L1 || stromal cell-derived factor 2-like 1 (1)	4.53064	2.73937	0.604632	6.60286	0	0.0140048	1	1	1	0	0	1	0	0	0	1	0	-0.2535	-16.46	1	1	1	0	0	0	0	0	0	1	0	0	1	1	0	0	1	0
NM_015702	27249	C2orf25 || chromosome 2 open reading frame 25 (2)	4.46734	3.25088	0.727698	9.51532	0	0.0193345	0	0	0	0	0	0	0	0	0	0	0	NA	NA	0	0	0	0	0	0	0	0	0	0	0	0	0	0	0	0	0	0
NM_004862	9516	LITAF || lipopolysaccharide-induced TNF factor (1)	4.42878	3.15163	0.711624	9.4622	0	0.0229848	4	1	0	2	0	1	0	0	1	1	0	-0.1062	-17.55	0	1	0	0	0	0	0	0	2	4	2	2	0	0	0	0	0	0
NM_000183	3032	HADHB || hydroxyacyl-Coenzyme A dehydrogenase/3-ketoacyl-Coenzyme A thiolase/enoyl-Coenzyme A hydratase (trifunctional protein), beta subunit (3)	4.27474	2.85425	0.667702	7.61041	0	0.040676	0	1	0	0	0	0	0	0	1	0	0	NA	NA	1	0	0	0	0	0	1	0	0	0	0	0	0	0	0	0	0	0
NM_002301	3948	LDHC || lactate dehydrogenase C (2)	4.25547	2.79481	0.656758	6.96621	0	0.0432236	0	0	0	0	0	0	0	0	0	0	0	NA	NA	0	1	0	0	0	1	1	1	0	0	0	0	0	0	0	0	0	0
NM_080670	113829	SLC35A4 || solute carrier family 35, member A4 (1)	4.15389	2.26471	0.545202	4.80459	0	0.0576865	1	1	1	0	0	1	0	1	0	1	0	-0.1861	NA	0	0	0	0	0	0	0	0	0	1	0	0	1	1	0	0	0	0
NM_001359	1666	DECR1 || 2,4-dienoyl CoA reductase 1, mitochondrial (2)	4.08182	3.93	0.962806	19.0385	0	0.0687969	0	0	0	0	0	0	0	0	0	0	0	NA	NA	1	1	1	0	0	0	0	0	0	0	0	0	0	0	0	0	1	0
NM_003068	6591	SNAI2 || snail homolog 2 (Drosophila) (2)	4.03838	4.03929	1.00023	22.7311	0	0.0756559	3	3	3	1	1	0	0	0	1	0	1	-0.7801	NA	0	0	0	0	0	0	0	0	1	3	1	0	3	0	0	0	0	0
NM_001914	1528	CYB5 || cytochrome b-5 (1)	3.98038	2.34079	0.588083	5.02854	0	0.0847979	1	1	1	0	0	0	0	0	0	0	0	NA	-21.74	0	0	0	0	0	0	0	0	0	1	0	0	1	1	0	0	0	0
NM_022821	64834	ELOVL1 || elongation of very long chain fatty acids (FEN1/Elo2, SUR4/Elo3, yeast)-like 1 (2)	3.89928	2.68879	0.689561	6.64004	0	0.0970803	1	1	0	1	0	0	0	1	1	0	1	-0.0453	-18.06	1	0	0	0	0	0	0	0	1	1	1	0	0	0	0	0	0	0
NM_006714	10924	SMPDL3A || sphingomyelin phosphodiesterase, acid-like 3A (1)	3.88783	2.53136	0.651099	6.15215	0	0.0987209	1	0	0	1	0	0	0	0	0	0	1	-0.1669	-18.17	0	0	0	0	0	0	0	0	1	1	1	0	0	0	0	0	0	0
NM_014305	23483	TGDS || TDP-glucose 4,6-dehydratase (2)	3.80671	2.74983	0.722365	6.52209	0	0.109176	1	1	0	1	0	0	0	0	0	0	1	-0.1509	-16.68	2	2	2	0	0	0	0	0	1	1	1	0	0	0	0	0	2	1
NM_030969	81853	TMEM14B || transmembrane protein 14B (2)	3.79696	2.20398	0.580458	4.56551	0	0.11025	0	0	0	0	0	0	0	0	0	0	0	NA	NA	1	1	1	0	0	0	0	0	0	0	0	0	0	0	0	0	1	0
NM_016361	51205	ACP6 || acid phosphatase 6, lysophosphatidic (1)	3.77548	2.5885	0.685608	6.66858	0	0.112443	1	1	1	0	0	0	0	0	0	0	1	-0.27	-20.15	1	0	0	0	0	0	0	0	0	1	NA	NA	NA	NA	NA	NA	NA	NA
NM_022075	29956	LASS2 || LAG1 longevity assurance homolog 2 (S. cerevisiae) (2)	3.77128	2.49175	0.660718	5.97857	0	0.112842	4	1	1	1	1	1	0	0	1	1	0	-0.3186	-17.88	2	0	0	0	0	0	0	0	1	4	1	1	1	1	0	0	0	0
NM_024592	79644	SRD5A2L || steroid 5 alpha-reductase 2-like (2)	3.77082	2.42704	0.643637	5.30053	0	0.112884	0	0	0	0	0	0	0	0	0	0	0	NA	NA	2	2	1	1	1	0	0	0	0	0	0	0	0	0	1	0	1	0
NA	25845	DKFZP564I1171 || DKFZP564I1171 protein (2)	3.74748	2.16458	0.57761	4.46674	0	0.114899	NA	NA	NA	NA	NA	0	0	0	0	0	0	NA	NA	NA	NA	NA	NA	NA	NA	NA	NA	NA	NA	NA	NA	NA	NA	NA	NA	NA	NA
NM_031216	81929	SEH1L || SEH1-like (S. cerevisiae) (1)	3.73998	2.58537	0.691281	6.30882	0	0.115473	1	1	0	1	0	0	0	0	0	0	1	-0.1781	-19.69	0	0	0	0	0	0	0	0	2	1	1	0	0	0	0	0	0	0
NM_017811	54926	UBE2R2 || ubiquitin-conjugating enzyme E2R 2 (1)	3.70475	2.05127	0.553686	4.20096	0	0.117636	0	0	0	0	0	0	0	0	0	0	0	NA	NA	2	1	1	0	0	0	0	0	0	0	0	0	0	0	0	0	1	1
NA	117581	TWIST2 || twist homolog 2 (Drosophila) (1)	3.69527	2.66908	0.722296	6.10903	0	0.118056	NA	NA	NA	NA	NA	0	0	0	0	0	0	NA	NA	NA	NA	NA	NA	NA	NA	NA	NA	NA	NA	NA	NA	NA	NA	NA	NA	NA	NA
NM_015917	373156	GSTK1 || glutathione S-transferase kappa 1 (2)	3.67712	1.9657	0.534576	3.8824	0	0.118651	1	1	1	0	0	0	0	0	0	0	1	-0.2628	-23.24	0	0	0	0	0	NA	NA	NA	0	1	0	0	1	0	0	0	0	0
NM_001039492	2274	FHL2 || four and a half LIM domains 2 (1)	3.67024	2.21342	0.603071	4.59216	0	0.1188	2	0	0	0	0	0	0	0	0	0	0	NA	-18.35	0	0	0	0	0	0	1	0	0	2	0	0	0	0	0	0	0	0
NM_002211	3688	ITGB1 || integrin, beta 1 (fibronectin receptor, beta polypeptide, antigen CD29 includes MDF2, MSK12) (3)	3.6697	2.43783	0.664313	5.32867	0	0.118809	4	2	2	0	0	1	0	0	1	1	0	-0.6056	-20.96	2	0	0	1	0	0	0	0	1	4	0	0	2	2	1	0	0	0
NM_144578	93487	C14orf32 || chromosome 14 open reading frame 32 (1)	3.65729	2.64329	0.722746	6.89567	0	0.118959	2	1	0	1	0	0	0	0	1	0	1	-0.1411	-21.98	2	3	2	0	0	0	0	0	1	2	1	0	0	0	0	0	2	2
NM_007218	11236	RNF139 || ring finger protein 139 (1)	3.62523	2.0668	0.570116	4.25648	0	0.118628	0	0	0	0	0	0	0	0	0	0	0	NA	NA	3	4	1	0	0	0	0	0	0	0	0	0	0	0	0	0	1	1
NM_018943	51807	TUBA8 || tubulin, alpha 8 (1)	3.6167	2.39304	0.661665	5.11775	0	0.118352	1	1	0	1	0	0	0	0	0	0	1	0.0162	-16.23	0	0	0	0	0	0	0	0	1	1	1	0	0	0	0	0	0	0
NM_006435	10581	IFITM2 || interferon induced transmembrane protein 2 (1-8D) (2)	3.53653	2.59158	0.732804	5.84606	0	0.111214	0	0	0	0	0	0	0	0	0	0	0	NA	NA	0	2	0	0	0	0	0	0	0	0	0	0	0	0	0	0	0	0
NM_138782	115548	FCHO2 || FCH domain only 2 (1)	3.50343	2.40058	0.685209	5.48342	0	0.105482	1	3	1	0	0	1	0	0	1	1	0	-0.2625	NA	0	0	0	0	0	NA	NA	NA	0	1	0	0	1	1	0	0	0	0
NM_001497	2683	B4GALT1 || UDP-Gal:betaGlcNAc beta 1,4- galactosyltransferase, polypeptide 1 (1)	3.49309	2.33596	0.668737	5.35693	0	0.103309	6	5	3	1	1	1	0	0	1	1	1	-0.7046	-25.3	0	0	0	0	0	0	0	0	1	6	1	1	3	2	0	0	0	0
NM_130468	113189	D4ST1 || dermatan 4 sulfotransferase 1 (1)	3.48621	2.47971	0.711291	5.4925	0	0.101758	1	2	1	0	0	0	0	0	1	0	1	-0.2227	-21.12	0	0	0	0	0	0	0	0	0	1	0	0	1	0	0	0	0	0
NM_001008393	201725	LOC201725 || hypothetical protein LOC201725 (2)	3.46889	2.3589	0.680014	5.21355	0	0.0974696	1	1	1	1	1	0	0	0	0	0	1	-0.382	NA	1	0	0	0	0	0	0	0	1	1	1	0	1	0	0	0	0	0
NM_024792	79850	FAM57A || family with sequence similarity 57, member A (1)	3.45445	2.31454	0.670018	5.41928	0	0.0934549	1	1	1	0	0	1	0	0	0	1	0	-0.2776	-22.22	1	0	0	0	0	NA	NA	NA	0	1	0	0	1	1	0	0	0	0
NM_005857	10269	ZMPSTE24 || zinc metallopeptidase (STE24 homolog, yeast) (1)	3.40902	2.24433	0.658351	4.62291	0	0.0780414	2	2	1	0	0	1	0	1	0	1	0	-0.2524	NA	0	0	0	0	0	0	0	0	0	2	0	0	1	1	0	0	0	0
NM_003909	8895	CPNE3 || copine III (1)	3.40377	2.01638	0.592395	4.14672	0	0.0759677	3	4	2	1	1	0	0	0	1	0	1	-0.4834	NA	1	1	1	0	0	0	0	0	1	3	1	0	2	0	0	0	1	1
NM_001080378	135138	PACRG || PARK2 co-regulated (1)	3.39526	2.25183	0.663229	4.66354	0	0.0724722	0	2	0	0	0	0	0	0	0	0	0	NA	-19.97	3	1	1	1	1	1	1	1	0	0	0	0	0	0	1	0	1	0
NM_031469	83699	SH3BGRL2 || SH3 domain binding glutamic acid-rich protein like 2 (1)	3.38965	2.87794	0.849037	9.19931	0	0.0700778	3	1	0	0	0	0	0	0	0	0	0	NA	-18.75	0	0	0	0	0	0	0	0	0	3	0	0	0	0	0	0	0	0
NM_000728	797	CALCB || calcitonin-related polypeptide, beta (1)	3.37822	2.22412	0.658372	4.6584	0	0.0649591	1	1	1	0	0	0	0	0	0	0	1	-0.2106	-16.83	0	0	0	0	0	0	0	0	0	1	0	0	1	0	0	0	0	0
NM_001040202	152559	PAQR3 || progestin and adipoQ receptor family member III (1)	3.37583	1.98483	0.587954	3.96365	0	0.0638499	2	2	0	0	0	0	0	0	0	0	0	NA	-21.13	0	0	0	0	0	0	0	0	1	2	0	0	0	0	0	0	0	0
NM_032547	60592	SCOC || short coiled-coil protein (2)	3.35027	3.03433	0.905699	9.87613	0	0.0510705	0	1	0	0	0	0	0	0	0	0	0	NA	NA	0	0	0	0	0	0	0	0	0	0	0	0	0	0	0	0	0	0
NA	439982	na || similar to Transmembrane protein 14B (1)	3.34194	2.17954	0.652179	4.76361	0	0.0465383	NA	NA	NA	NA	NA	0	0	0	0	0	0	NA	NA	NA	NA	NA	NA	NA	NA	NA	NA	NA	NA	NA	NA	NA	NA	NA	NA	NA	NA
NA	391824	na || similar to tubulin, alpha 6; tubulin alpha 6 (1)	3.31787	1.99067	0.599983	3.96411	0	0.0323815	NA	NA	NA	NA	NA	0	0	0	0	0	0	NA	NA	NA	NA	NA	NA	NA	NA	NA	NA	NA	NA	NA	NA	NA	NA	NA	NA	NA	NA
NM_021238	58516	FAM60A || family with sequence similarity 60, member A (1)	3.3115	2.09636	0.633055	4.54653	0	0.0283569	1	1	0	0	0	0	0	0	0	0	0	NA	-18.3	0	1	0	0	0	0	0	0	0	1	0	0	0	0	0	0	0	0
NA	51275	FLJ39616 || apoptosis-related protein PNAS-1 (2)	3.29011	2.11665	0.643336	4.53466	0	0.0139955	NA	NA	NA	NA	NA	0	0	0	0	0	0	NA	NA	NA	NA	NA	NA	NA	NA	NA	NA	NA	NA	NA	NA	NA	NA	NA	NA	NA	NA
NM_001077269	7456	WASPIP || Wiskott-Aldrich syndrome protein interacting protein (1)	3.28756	2.64079	0.803268	6.63831	0	0.012191	3	2	1	1	1	1	0	0	0	1	0	-0.3683	-23.24	2	2	2	0	0	0	0	0	1	3	1	1	1	1	0	0	2	1
NM_006809	10953	TOMM34 || translocase of outer mitochondrial membrane 34 (1)	3.26449	2.41971	0.741221	6.00168	0	0	3	1	1	0	0	1	0	0	0	1	0	-0.0992	-18.49	2	2	1	0	0	0	0	0	0	3	0	0	1	1	0	0	1	1
NM_004781	9341	VAMP3 || vesicle-associated membrane protein 3 (cellubrevin) (3)	3.23719	2.33067	0.719965	4.91443	0	0	5	3	3	1	1	1	0	0	1	1	0	-0.8226	NA	0	0	0	0	0	0	0	0	2	5	1	1	3	3	0	0	0	0
NA	28971	PTD015 || PTD015 protein (1)	3.22362	3.09554	0.960268	8.24965	0	0	NA	NA	NA	NA	NA	0	0	0	0	0	0	NA	NA	NA	NA	NA	NA	NA	NA	NA	NA	NA	NA	NA	NA	NA	NA	NA	NA	NA	NA
NA	63933	C6orf79 || chromosome 6 open reading frame 79 (2)	3.21317	2.42908	0.755977	5.45777	0	0	NA	NA	NA	NA	NA	0	0	0	0	0	0	NA	NA	NA	NA	NA	NA	NA	NA	NA	NA	NA	NA	NA	NA	NA	NA	NA	NA	NA	NA
NM_018004	55076	TMEM45A || transmembrane protein 45A (1)	3.19218	1.68529	0.527943	3.19795	0	0	1	0	0	1	0	0	0	0	0	0	1	-0.1545	-18.21	2	0	0	1	0	0	0	0	1	1	1	0	0	0	1	0	0	0
NA	81625	GALIG || galectin-3 internal gene (1)	3.18498	2.22829	0.699624	5.00562	0	0	NA	NA	NA	NA	NA	0	0	0	0	0	0	NA	NA	NA	NA	NA	NA	NA	NA	NA	NA	NA	NA	NA	NA	NA	NA	NA	NA	NA	NA
NM_006335	10440	TIMM17A || translocase of inner mitochondrial membrane 17 homolog A (yeast) (1)	3.17749	2.30294	0.724767	5.48435	0	0	0	0	0	0	0	0	0	0	0	0	0	NA	NA	2	1	1	1	1	NA	NA	NA	0	0	0	0	0	0	1	1	1	1
NM_005768	10162	C3F || putative protein similar to nessy (Drosophila) (1)	3.1691	2.28353	0.72056	4.76291	0	0	1	1	0	1	0	0	1	1	0	1	0	-0.0585	-17.64	2	0	0	1	0	0	0	0	1	1	1	1	0	0	1	1	0	0
NM_206824	79001	VKORC1 || vitamin K epoxide reductase complex, subunit 1 (3)	3.16883	2.26754	0.715577	4.71541	0	0	0	1	0	0	0	0	0	0	0	0	0	NA	NA	0	0	0	0	0	0	0	0	0	0	0	0	0	0	0	0	0	0
NM_032731	84817	TXNL5 || thioredoxin-like 5 (3)	3.10627	1.93104	0.62166	3.8198	0	0	1	2	1	1	1	0	0	0	0	0	0	NA	-20.32	0	1	0	0	0	0	0	0	2	1	1	0	1	0	0	0	0	0
NM_001013653	389816	LOC389816 || similar to CDNA sequence BC004853 (1)	3.10404	2.35412	0.758406	5.04467	0	0	1	0	0	0	0	0	0	0	0	0	0	NA	-19.76	2	2	1	0	0	0	0	0	0	1	0	0	0	0	0	0	1	0
NM_152261	90488	MGC17943 || hypothetical protein MGC17943 (2)	3.08917	2.48263	0.803655	5.92219	0	0	1	2	0	1	0	0	0	1	0	1	0	-0.1301	-18.4	1	1	1	0	0	0	0	0	1	1	1	1	0	0	0	0	1	1
NM_001042574	64784	TORC3 || transducer of regulated cAMP response element-binding protein (CREB) 3 (1)	3.0604	1.54513	0.504876	2.90685	0	0	2	3	2	2	2	0	0	0	0	0	1	-0.4634	-18.98	1	1	0	0	0	0	0	0	2	2	2	0	2	0	0	0	0	0
NM_021034	10410	IFITM3 || interferon induced transmembrane protein 3 (1-8U) (1)	3.05987	2.24565	0.733905	4.64022	0	0	0	0	0	0	0	0	0	0	0	0	0	NA	NA	0	1	0	0	0	0	0	0	0	0	0	0	0	0	0	0	0	0
NM_032740	84826	MGC5391 || hypothetical protein MGC5391 (1)	3.05768	1.94796	0.63707	4.08129	0	0	4	1	1	2	1	0	0	0	0	0	1	-0.4203	-22.15	0	2	0	0	0	1	0	0	2	4	2	0	1	0	0	0	0	0
NM_006014	8270	DXS9879E || DNA segment on chromosome X (unique) 9879 expressed sequence (2)	3.05552	2.41297	0.78971	5.20186	0	0	0	0	0	0	0	0	0	0	0	0	0	NA	NA	1	1	1	0	0	0	0	0	1	0	0	0	0	0	0	0	1	1
NM_014713	9741	LAPTM4A || lysosomal-associated protein transmembrane 4 alpha (1)	3.03823	2.16539	0.712713	4.63817	0	0	2	0	0	0	0	0	0	0	0	0	0	NA	NA	2	0	0	1	0	0	0	0	0	2	0	0	0	0	1	0	0	0
NA	283491	OR7E156P || olfactory receptor, family 7, subfamily E, member 156 pseudogene (2)	3.03303	2.26367	0.746339	4.71741	0	0	NA	NA	NA	NA	NA	0	0	0	0	0	0	NA	NA	NA	NA	NA	NA	NA	NA	NA	NA	NA	NA	NA	NA	NA	NA	NA	NA	NA	NA
NM_203458	388677	NOTCH2NL || Notch homolog 2 (Drosophila) N-terminal like (1)	3.0243	1.93138	0.638618	3.90228	0	0	0	1	0	0	0	0	0	0	0	0	0	NA	-18.75	2	2	1	0	0	0	0	0	0	0	0	0	0	0	0	0	1	0
NM_001017998	2790	GNG10 || guanine nucleotide binding protein (G protein), gamma 10 (1)	3.02429	2.61642	0.865135	6.51319	0	0	3	1	1	0	0	0	0	0	1	1	0	-0.2828	-20.5	0	0	0	0	0	0	0	0	0	3	0	0	1	1	NA	NA	NA	NA
NM_017801	54918	CKLFSF6 || chemokine-like factor super family 6 (1)	3.01307	2.04735	0.679492	4.10321	0	0	0	1	0	0	0	0	0	0	0	0	0	NA	-18.79	1	1	1	0	0	0	0	0	1	0	0	0	0	0	0	0	1	0
NM_003870	8826	IQGAP1 || IQ motif containing GTPase activating protein 1 (2)	3.0104	2.27204	0.75473	5.12887	0	0	4	2	2	1	1	1	0	0	1	1	1	-0.6001	-21.72	3	1	0	1	0	0	0	0	2	4	1	1	2	1	1	0	0	0
NM_005665	7813	EVI5 || ecotropic viral integration site 5 (1)	2.98117	2.33579	0.783516	5.58237	0	0	4	2	2	0	0	1	0	0	0	1	0	-0.5618	-22.08	1	1	0	0	0	NA	NA	NA	0	4	0	0	2	2	0	0	0	0
NM_006111	10449	ACAA2 || acetyl-Coenzyme A acyltransferase 2 (mitochondrial 3-oxoacyl-Coenzyme A thiolase) (4)	2.98035	2.3461	0.787192	5.22755	0	0	2	0	0	2	0	0	0	0	1	0	1	-0.2391	-21.22	1	0	0	0	0	NA	NA	NA	2	2	2	0	0	0	0	0	0	0
NM_001017368	117584	RFFL || rififylin (1)	2.96931	1.98474	0.668416	4.22715	0	0	3	1	1	2	1	1	0	0	0	1	1	-0.2797	-17.88	1	1	0	0	0	0	0	0	3	3	2	1	1	1	0	0	0	0
NM_032574	84661	LOC84661 || dpy-30-like protein (2)	2.95805	1.89875	0.641893	3.72949	0	0	0	0	0	0	0	0	0	0	0	0	0	NA	NA	0	2	0	0	0	0	0	0	0	0	0	0	0	0	0	0	0	0
NM_012434	26503	SLC17A5 || solute carrier family 17 (anion/sugar transporter), member 5 (1)	2.94523	1.99767	0.678273	4.23613	0	0	2	2	2	0	0	1	0	0	1	1	1	-0.4048	-18.24	1	0	0	1	0	0	0	0	0	2	0	0	2	1	1	0	0	0
NM_001010875	253512	SLC25A30 || solute carrier family 25, member 30 (1)	2.93163	2.28242	0.778549	5.40281	0	0	0	0	0	0	0	0	0	0	1	0	0	NA	NA	0	0	0	0	0	0	0	0	0	0	0	0	0	0	0	0	0	0
NM_001001664	339745	LOC339745 || hypothetical protein LOC339745 (1)	2.92493	2.14653	0.733873	4.8142	0	0	4	4	3	0	0	1	1	0	0	1	1	-0.7006	-26.72	0	2	0	0	0	0	0	0	1	4	0	0	3	2	0	0	0	0
NM_000112	1836	SLC26A2 || solute carrier family 26 (sulfate transporter), member 2 (2)	2.92332	2.22225	0.760181	5.2393	0	0	5	2	1	1	0	0	0	0	0	0	1	-0.3187	-25.21	3	3	2	1	1	0	0	0	3	5	1	0	1	0	1	1	2	1
NM_016006	51099	ABHD5 || abhydrolase domain containing 5 (1)	2.92037	1.65383	0.56631	3.15287	0	0	1	1	1	0	0	1	0	0	1	1	0	-0.2893	NA	1	1	1	0	0	0	0	0	0	1	0	0	1	1	0	0	1	0
NM_173552	205428	MGC33365 || hypothetical protein MGC33365 (1)	2.91953	2.20479	0.755188	4.79943	0	0	1	1	1	0	0	0	0	1	0	1	0	-0.2935	-22.03	0	0	0	0	0	0	0	0	0	1	0	0	1	1	0	0	0	0
NM_001031727	84245	MGC3207 || hypothetical protein MGC3207 (1)	2.91744	1.81179	0.62102	3.49674	0	0	2	4	2	0	0	0	0	0	0	0	1	-0.3875	-17.09	2	0	0	0	0	0	0	0	0	2	0	0	2	0	0	0	0	0
NM_004339	754	PTTG1IP || pituitary tumor-transforming 1 interacting protein (1)	2.91453	2.1127	0.724885	4.97238	0	0	2	2	1	1	1	1	0	0	1	1	0	-0.4612	-23.48	0	1	0	0	0	0	0	0	1	2	1	0	1	0	0	0	0	0
NM_194356	2054	EPIM || epimorphin (1)	2.91421	1.69579	0.581904	3.29036	0	0	2	1	1	0	0	1	0	0	1	0	0	NA	-18.29	0	0	0	0	0	0	0	0	0	2	0	0	1	1	0	0	0	0
NM_022365	64215	DNAJC1 || DnaJ (Hsp40) homolog, subfamily C, member 1 (2)	2.90432	1.98408	0.683149	4.11943	0	0	1	1	1	1	1	1	1	0	1	1	0	-0.5145	-28.81	1	0	0	1	0	0	0	0	1	1	1	1	1	1	1	1	0	0
NM_018366	55330	CNO || cappuccino homolog (mouse) (1)	2.90088	2.05079	0.706955	4.54152	0	0	0	0	0	0	0	0	0	0	0	0	0	NA	-16.31	0	0	0	0	0	0	0	0	0	0	0	0	0	0	0	0	0	0
NM_014415	27107	ZBTB11 || zinc finger and BTB domain containing 11 (1)	2.87538	1.88808	0.656638	3.63524	0	0	1	1	1	0	0	1	0	1	0	1	0	-0.2913	-19.19	1	2	1	0	0	0	0	0	0	1	0	0	1	1	0	0	1	1
NM_005776	10175	CNIH || cornichon homolog (Drosophila) (1)	2.86937	2.19287	0.764237	4.45842	0	0	0	0	0	0	0	0	0	0	0	0	0	NA	NA	0	0	0	0	0	0	0	0	0	0	0	0	0	0	0	0	0	0
NM_006606	10741	RBBP9 || retinoblastoma binding protein 9 (1)	2.83142	1.43167	0.505636	2.69049	0	0	1	1	0	0	0	0	0	0	0	0	0	NA	-22.71	0	0	0	0	0	0	0	0	0	1	0	0	0	0	0	0	0	0
NM_032435	84451	KIAA1804 || mixed lineage kinase 4 (1)	2.82778	1.86734	0.660358	3.69883	0	0	3	1	1	1	1	0	0	0	0	0	1	NA	-18.23	2	4	1	1	0	0	0	0	1	3	1	0	1	0	1	0	1	0
NM_001098520	10553	HTATIP2 || HIV-1 Tat interactive protein 2, 30kDa (1)	2.8271	2.18158	0.771668	5.17276	0	0	1	1	1	0	0	1	0	0	1	0	0	NA	-16.23	1	1	0	0	0	0	0	0	0	1	0	0	1	1	0	0	0	0
NA	83742	MARVELD1 || MARVEL domain containing 1 (1)	2.81863	2.19229	0.777786	4.70227	0	0	NA	NA	NA	NA	NA	1	0	0	0	0	0	NA	NA	NA	NA	NA	NA	NA	NA	NA	NA	NA	NA	NA	NA	NA	NA	NA	NA	NA	NA
NM_014170	29083	HSPC135 || HSPC135 protein (2)	2.79994	2.06804	0.738603	4.56386	0	0	1	2	1	0	0	0	0	0	0	0	1	-0.1914	-25.38	0	0	0	0	0	NA	NA	NA	0	1	0	0	1	0	0	0	0	0
NM_002508	4811	NID || nidogen (enactin) (1)	2.79389	1.80183	0.644919	3.51611	0	0	2	2	2	2	2	0	0	0	0	0	1	NA	-17.85	0	2	0	0	0	0	0	0	3	2	2	0	2	0	0	0	0	0
NA	26255	PTTG3 || pituitary tumor-transforming 3 (2)	2.79276	1.64721	0.589813	3.09997	0	0	NA	NA	NA	NA	NA	0	0	0	0	0	0	NA	NA	NA	NA	NA	NA	NA	NA	NA	NA	NA	NA	NA	NA	NA	NA	NA	NA	NA	NA
NA	441371	na || similar to hypothetical protein A630048M13 (1)	2.79175	1.61391	0.5781	3.03819	0	0	NA	NA	NA	NA	NA	0	0	0	0	0	0	NA	NA	NA	NA	NA	NA	NA	NA	NA	NA	NA	NA	NA	NA	NA	NA	NA	NA	NA	NA
NM_007167	9204	ZNF258 || zinc finger protein 258 (3)	2.77647	2.51319	0.905173	6.60481	0	0	0	0	0	0	0	0	0	0	0	0	0	NA	NA	1	0	0	0	0	0	0	0	0	0	0	0	0	0	0	0	0	0
NM_013330	29922	NME7 || non-metastatic cells 7, protein expressed in (nucleoside-diphosphate kinase) (2)	2.74894	1.95843	0.712431	3.99762	0	0	0	0	0	0	0	0	0	0	0	0	0	NA	NA	0	0	0	0	0	0	0	0	0	0	0	0	0	0	0	0	0	0
NM_019054	54537	FAM35A || family with sequence similarity 35, member A (2)	2.74154	1.73256	0.631967	3.2573	0	0	1	1	1	1	1	0	0	0	1	0	1	-0.4029	-23.21	1	1	1	0	0	0	0	0	1	1	1	0	1	0	0	0	1	0
NA	8677	STX10 || syntaxin 10 (1)	2.74115	2.07076	0.755435	4.24345	0	0	NA	NA	NA	NA	NA	0	0	0	1	0	0	NA	NA	NA	NA	NA	NA	NA	NA	NA	NA	NA	NA	NA	NA	NA	NA	NA	NA	NA	NA
NM_032800	84886	FLJ14525 || hypothetical protein FLJ14525 (1)	2.73979	1.89421	0.691371	4.11529	0	0	0	0	0	0	0	0	0	0	0	0	0	NA	-23.83	0	1	0	0	0	NA	NA	NA	1	0	0	0	0	0	0	0	0	0
NM_001102559	84513	HTPAP || HTPAP protein (1)	2.73022	1.602	0.586766	2.99939	0	0	0	0	0	0	0	0	0	0	0	0	0	NA	NA	1	1	1	0	0	NA	NA	NA	1	0	0	0	0	0	0	0	1	0
NM_199337	374395	LOC374395 || similar to RIKEN cDNA 1810059G22 (1)	2.72625	1.83825	0.674277	3.63641	0	0	0	1	0	0	0	0	0	0	0	0	0	NA	NA	0	0	0	0	0	NA	NA	NA	0	0	0	0	0	0	0	0	0	0
NM_002524	4893	NRAS || neuroblastoma RAS viral (v-ras) oncogene homolog (1)	2.71265	2.046	0.754243	4.36232	0	0	1	1	1	0	0	1	0	0	0	1	0	-0.269	-20.04	0	0	0	0	0	0	0	0	0	1	0	0	1	1	0	0	0	0
NM_004685	9107	MTMR6 || myotubularin related protein 6 (1)	2.70858	1.48037	0.546551	2.79045	0	0	3	1	1	1	0	0	1	0	1	0	1	-0.2167	-18.59	0	1	0	0	0	0	0	0	2	3	1	0	1	0	0	0	0	0
NM_025188	80263	TRIM45 || tripartite motif-containing 45 (1)	2.70653	2.19121	0.809602	5.15674	0	0	4	5	4	1	1	0	0	0	0	0	1	-1.0631	-19.23	1	0	0	0	0	0	0	0	1	4	1	0	4	0	0	0	0	0
NA	144383	na || similar to Interferon-induced transmembrane protein 3 (Interferon-inducible protein 1-8U) (1)	2.70177	2.13601	0.790595	4.29027	0	0	NA	NA	NA	NA	NA	0	0	0	0	0	0	NA	NA	NA	NA	NA	NA	NA	NA	NA	NA	NA	NA	NA	NA	NA	NA	NA	NA	NA	NA
NM_024501	3231	HOXD1 || homeo box D1 (1)	2.69198	1.91587	0.711698	3.59806	0	0	0	1	0	0	0	0	0	0	0	0	0	NA	-16.65	0	0	0	0	0	0	0	0	0	0	0	0	0	0	0	0	0	0
NM_001154	308	ANXA5 || annexin A5 (2)	2.68776	2.03121	0.755726	4.05973	0	0	2	1	0	1	0	1	0	0	0	1	0	-0.1147	-19.76	1	0	0	0	0	0	0	0	1	2	1	1	0	0	0	0	0	0
NM_002971	6304	SATB1 || special AT-rich sequence binding protein 1 (binds to nuclear matrix/scaffold-associating DNA's) (1)	2.68456	2.01288	0.749798	4.34419	0	0	1	0	0	0	0	0	0	1	0	0	0	NA	-17.78	1	1	1	0	0	0	0	0	0	1	0	0	0	0	0	0	1	1
NM_020159	56916	SMARCAD1 || SWI/SNF-related, matrix-associated actin-dependent regulator of chromatin, subfamily a, containing DEAD/H box 1 (1)	2.68429	1.71162	0.637645	3.42708	0	0	1	1	1	1	1	1	1	0	0	1	0	-0.4506	-16.46	1	0	0	0	0	0	1	0	1	1	1	1	1	1	0	0	0	0
NM_052940	115353	LRRC42 || leucine rich repeat containing 42 (1)	2.67893	1.98329	0.740331	4.40998	0	0	0	0	0	0	0	0	0	0	0	0	0	NA	NA	1	1	1	0	0	0	0	0	0	0	0	0	0	0	0	0	1	1
NM_183239	119391	GSTO2 || glutathione S-transferase omega 2 (1)	2.67885	1.78913	0.667871	3.34119	0	0	0	0	0	0	0	0	0	0	0	0	0	NA	NA	1	1	0	0	0	0	0	0	0	0	0	0	0	0	0	0	0	0
NM_006479	10635	RAD51AP1 || RAD51 associated protein 1 (4)	2.66788	2.16663	0.812115	4.98545	0	0	1	1	1	0	0	0	0	0	0	0	1	-0.2485	-18.7	0	0	0	0	0	0	0	0	0	1	0	0	1	0	0	0	0	0
NM_014367	26355	E2IG5 || growth and transformation-dependent protein (1)	2.66731	1.81029	0.678696	3.63517	0	0	0	1	0	0	0	0	0	0	0	0	0	NA	NA	1	1	1	0	0	0	0	0	0	0	0	0	0	0	0	0	1	0
NM_017966	55048	VPS37C || vacuolar protein sorting 37C (yeast) (1)	2.66047	1.97408	0.742005	4.35513	0	0	3	4	2	0	0	1	0	0	0	1	0	-0.369	-21.9	0	1	0	0	0	0	0	0	0	3	0	0	2	2	0	0	0	0
NM_000320	5860	QDPR || quinoid dihydropteridine reductase (3)	2.66028	1.45175	0.545713	2.72285	0	0	1	1	0	1	0	0	0	0	0	0	1	-0.1291	-16.59	0	0	0	0	0	NA	NA	NA	1	1	1	0	0	0	0	0	0	0
NM_006811	10955	TDE1 || tumor differentially expressed 1 (4)	2.64754	1.59958	0.604178	3.09566	0	0	0	0	0	0	0	0	0	0	0	0	0	NA	-19.03	0	1	0	0	0	0	0	0	0	0	0	0	0	0	0	0	0	0
NM_022133	64089	SNX16 || sorting nexin 16 (1)	2.64038	1.77038	0.670501	3.67358	0	0	2	2	2	0	0	0	0	0	0	0	1	-0.5104	NA	1	0	0	0	0	0	0	0	0	2	0	0	2	0	0	0	0	0
NM_024092	79073	MGC5508 || hypothetical protein MGC5508 (1)	2.63565	1.87238	0.710404	3.78663	0	0	2	2	1	1	1	0	0	0	0	1	0	-0.3081	-18.74	1	1	0	0	0	0	0	0	1	2	1	1	1	1	0	0	0	0
NM_004275	9477	TRFP || Trf (TATA binding protein-related factor)-proximal homolog (Drosophila) (1)	2.6319	1.45338	0.552216	2.74979	0	0	1	1	1	1	1	0	0	0	0	0	1	-0.2662	-18.9	1	0	0	1	0	0	0	0	1	1	1	0	1	0	1	0	0	0
NM_001098477	2926	GRSF1 || G-rich RNA sequence binding factor 1 (3)	2.61408	1.66971	0.638737	3.21105	0	0	4	2	1	0	0	1	0	1	0	0	0	NA	NA	2	0	0	2	0	0	0	0	0	4	0	0	1	1	2	1	0	0
NM_016551	51768	TM7SF3 || transmembrane 7 superfamily member 3 (3)	2.60861	2.00575	0.768897	4.05922	0	0	0	1	0	0	0	0	0	0	0	0	0	NA	NA	1	1	1	0	0	NA	NA	NA	0	0	0	0	0	0	0	0	1	1
NM_002196	3642	INSM1 || insulinoma-associated 1 (1)	2.60367	1.94437	0.746782	3.77633	0	0	3	1	1	0	0	1	0	0	0	1	0	-0.1054	-18.97	0	0	0	0	0	0	0	0	0	3	0	0	1	1	0	0	0	0
NM_017851	54956	PARP16 || poly (ADP-ribose) polymerase family, member 16 (2)	2.60263	1.57783	0.606245	2.97273	0	0	5	1	1	1	1	1	1	1	1	1	0	-0.4356	-21.68	0	0	0	0	0	0	0	0	1	5	1	1	1	1	0	0	0	0
NM_014380	27018	NGFRAP1 || nerve growth factor receptor (TNFRSF16) associated protein 1 (2)	2.59671	2.95829	1.13925	6.61731	0	0	2	0	0	0	0	0	0	0	0	0	0	NA	-19.19	2	0	0	1	0	1	1	0	0	2	0	0	0	0	1	1	0	0
NM_005009	4833	NME4 || non-metastatic cells 4, protein expressed in (3)	2.59215	2.49921	0.964146	6.7511	0	0	1	1	1	0	0	1	0	0	1	1	0	-0.1862	-23.31	0	0	0	0	0	NA	NA	NA	0	1	0	0	1	1	0	0	0	0
NM_018983	54433	NOLA1 || nucleolar protein family A, member 1 (H/ACA small nucleolar RNPs) (3)	2.59127	2.3095	0.891262	5.80152	0	0	0	1	0	0	0	0	0	0	0	0	0	NA	NA	1	1	1	1	1	0	0	0	0	0	0	0	0	0	1	0	1	0
NM_024033	78996	MGC5242 || hypothetical protein MGC5242 (2)	2.58828	1.68625	0.651495	3.29699	0	0	1	1	1	0	0	0	0	0	0	0	1	-0.1958	-16.67	0	0	0	0	0	0	0	0	0	1	0	0	1	0	0	0	0	0
NM_001014842	10548	TM9SF1 || transmembrane 9 superfamily member 1 (1)	2.58517	1.46725	0.567564	2.80866	0	0	0	0	0	0	0	0	0	0	0	0	0	NA	NA	2	1	1	0	0	1	0	0	0	0	0	0	0	0	0	0	0	0
NM_004710	9144	SYNGR2 || synaptogyrin 2 (3)	2.58151	2.02779	0.785505	4.01269	0	0	0	2	0	0	0	0	0	0	1	0	0	NA	NA	0	0	0	0	0	NA	NA	NA	0	0	0	0	0	0	0	0	0	0
NM_178868	152189	CKLFSF8 || chemokine-like factor super family 8 (1)	2.56	1.54096	0.601937	2.85896	0	0	0	0	0	0	0	0	0	0	0	0	0	NA	NA	2	1	1	0	0	0	0	0	0	0	0	0	0	0	0	0	1	0
NM_139164	134429	STARD4 || START domain containing 4, sterol regulated (1)	2.55531	1.92271	0.752436	4.00167	0	0	1	3	1	1	1	0	0	0	0	0	1	-0.2452	NA	0	0	0	0	0	0	0	0	1	1	1	0	1	0	0	0	0	0
NA	10744	PTTG2 || pituitary tumor-transforming 2 (1)	2.55335	1.55117	0.607502	2.88471	0	0	NA	NA	NA	NA	NA	0	0	0	0	0	0	NA	NA	NA	NA	NA	NA	NA	NA	NA	NA	NA	NA	NA	NA	NA	NA	NA	NA	NA	NA
NM_005327	3033	HADHSC || L-3-hydroxyacyl-Coenzyme A dehydrogenase, short chain (1)	2.54569	1.69808	0.667043	3.46969	0	0	2	2	1	0	0	1	0	0	1	1	0	-0.1389	NA	0	1	0	0	0	0	0	0	0	2	0	0	1	1	0	0	0	0
NM_001002257	253558	LYCAT || lysocardiolipin acyltransferase (1)	2.53578	1.8445	0.727388	3.92934	0	0	3	2	1	2	1	1	0	0	0	1	1	-0.4055	-22.07	0	1	0	0	0	0	0	0	3	3	2	1	1	1	0	0	0	0
NM_018346	55316	RSAD1 || radical S-adenosyl methionine domain containing 1 (1)	2.53557	1.63225	0.643741	3.11422	0	0	1	2	1	0	0	0	0	0	0	0	1	-0.1477	-17.25	0	0	0	0	0	0	0	0	0	1	0	0	1	0	0	0	0	0
NM_017444	54108	CHRAC1 || chromatin accessibility complex 1 (2)	2.52649	1.62973	0.645055	3.08912	0	0	0	0	0	0	0	0	0	0	0	0	0	NA	NA	0	0	0	0	0	0	0	0	0	0	0	0	0	0	0	0	0	0
NM_020195	56948	C14orf124 || chromosome 14 open reading frame 124 (2)	2.52509	1.85231	0.733562	3.56527	0	0	0	0	0	0	0	0	0	0	0	0	0	NA	NA	1	0	0	1	0	NA	NA	NA	0	0	0	0	0	0	1	0	0	0
NM_138410	112616	CKLFSF7 || chemokine-like factor super family 7 (2)	2.52176	1.93767	0.768377	3.87416	0	0	3	2	1	1	1	0	0	0	0	0	1	-0.4019	-19.12	1	0	0	0	0	0	0	0	1	3	1	0	1	0	0	0	0	0
NM_006270	6237	RRAS || related RAS viral (r-ras) oncogene homolog (1)	2.51809	1.827	0.725549	3.3969	0	0	2	1	1	0	0	0	0	0	0	0	1	-0.164	NA	1	0	0	0	0	NA	NA	NA	0	2	0	0	1	0	0	0	0	0
NA	151507	na || similar to male-specific lethal 3-like 1 isoform a; drosophila MSL3-like 1 (1)	2.51414	1.38629	0.551398	2.63395	0	0	NA	NA	NA	NA	NA	0	0	0	0	0	0	NA	NA	NA	NA	NA	NA	NA	NA	NA	NA	NA	NA	NA	NA	NA	NA	NA	NA	NA	NA
NM_003348	7334	UBE2N || ubiquitin-conjugating enzyme E2N (UBC13 homolog, yeast) (2)	2.50903	1.59846	0.637082	3.03568	0	0	1	0	0	0	0	0	0	0	0	0	0	NA	-21.7	0	0	0	0	0	0	0	0	0	1	0	0	0	0	0	0	0	0
NM_012240	23409	SIRT4 || sirtuin (silent mating type information regulation 2 homolog) 4 (S. cerevisiae) (1)	2.50686	1.48075	0.590679	2.81862	0	0	1	0	0	0	0	0	0	0	0	0	0	NA	-21.25	1	0	0	0	0	NA	NA	NA	0	1	0	0	0	0	0	0	0	0
NM_001010924	221061	C10orf38 || chromosome 10 open reading frame 38 (1)	2.50461	1.77016	0.70676	3.70145	0	0	2	1	1	0	0	0	0	0	0	1	0	-0.2203	-22.38	1	1	0	0	0	NA	NA	NA	0	2	0	0	1	1	0	0	0	0
NM_024762	79818	ZNF552 || zinc finger protein 552 (1)	2.49809	1.53637	0.61502	2.8856	0	0	0	0	0	0	0	0	0	0	0	0	0	NA	NA	0	0	0	0	0	0	0	0	1	0	0	0	0	0	0	0	0	0
NA	388885	na || hypothetical LOC388885 (1)	2.49522	1.38508	0.555094	2.6146	0	0	NA	NA	NA	NA	NA	0	0	0	0	0	0	NA	NA	NA	NA	NA	NA	NA	NA	NA	NA	NA	NA	NA	NA	NA	NA	NA	NA	NA	NA
NM_005697	10066	SCAMP2 || secretory carrier membrane protein 2 (2)	2.49492	1.77096	0.709826	3.52714	0	0	2	1	1	1	1	1	0	1	0	1	0	-0.2492	-17.91	1	1	1	0	0	0	0	0	1	2	1	1	1	1	0	0	1	1
NM_004364	1050	CEBPA || CCAAT/enhancer binding protein (C/EBP), alpha (1)	2.49362	1.65554	0.663912	3.05003	0	0	4	4	3	0	0	1	0	0	1	1	0	-0.4839	-19.36	0	0	0	0	0	NA	NA	NA	0	4	0	0	3	3	0	0	0	0
NM_001037811	3028	HADH2 || hydroxyacyl-Coenzyme A dehydrogenase, type II (1)	2.49287	1.78867	0.717514	3.45818	0	0	0	1	0	0	0	0	0	0	0	0	0	NA	NA	1	0	0	0	0	NA	NA	NA	0	0	0	0	0	0	0	0	0	0
NM_001826	1163	CKS1B || CDC28 protein kinase regulatory subunit 1B (2)	2.48536	1.50754	0.606569	2.82484	0	0	1	0	0	0	0	0	0	0	0	0	0	NA	-17.85	0	0	0	0	0	NA	NA	NA	0	1	0	0	0	0	0	0	0	0
NM_032525	84617	TUBB6 || tubulin, beta 6 (1)	2.4825	1.89829	0.764668	3.97905	0	0	1	1	0	1	0	1	0	0	0	1	0	-0.0627	-20.41	0	0	0	0	0	NA	NA	NA	1	1	1	1	0	0	0	0	0	0
NM_197939	84282	RNF135 || ring finger protein 135 (1)	2.47681	1.59717	0.644849	3.00815	0	0	3	1	1	0	0	1	0	0	0	1	0	-0.2628	-22.04	0	0	0	0	0	0	0	0	0	3	0	0	1	1	0	0	0	0
NM_016033	51115	CGI-90 || CGI-90 protein (2)	2.47604	1.66871	0.673942	3.08996	0	0	2	0	0	1	0	0	0	0	0	0	1	0.0435	-20.94	3	0	0	1	0	0	0	0	1	2	1	0	0	0	1	0	0	0
NM_006764	7866	IFRD2 || interferon-related developmental regulator 2 (1)	2.46902	1.86158	0.753974	3.65637	0	0	1	1	1	0	0	0	0	0	1	0	1	-0.1481	-16.84	3	1	0	0	0	0	0	0	0	1	0	0	1	0	0	0	0	0
NM_032488	84518	CNFN || cornifelin (1)	2.45443	2.01454	0.820777	4.05516	0	0	0	0	0	0	0	0	0	0	0	0	0	NA	NA	1	1	1	0	0	0	0	0	0	0	0	0	0	0	0	0	1	0
NM_005841	10252	SPRY1 || sprouty homolog 1, antagonist of FGF signaling (Drosophila) (2)	2.44946	1.57725	0.643916	3.13074	0	0	1	0	0	1	0	0	1	0	0	0	1	-0.0754	-17.11	1	2	1	0	0	0	0	0	2	1	1	0	0	0	0	0	1	0
NM_000922	5140	PDE3B || phosphodiesterase 3B, cGMP-inhibited (1)	2.43256	1.77637	0.730248	3.38292	0	0	1	0	0	0	0	0	0	0	0	0	0	NA	-17.4	3	2	1	0	0	0	0	0	1	1	0	0	0	0	0	0	1	0
NM_002305	3956	LGALS1 || lectin, galactoside-binding, soluble, 1 (galectin 1) (1)	2.42793	2.18096	0.89828	5.4388	0	0	0	0	0	0	0	0	0	0	0	0	0	NA	NA	1	2	1	0	0	0	0	0	0	0	0	0	0	0	0	0	1	0
NM_052831	116843	C6orf192 || chromosome 6 open reading frame 192 (1)	2.4181	1.58933	0.657265	2.91061	0	0	0	0	0	0	0	0	0	0	0	0	0	NA	-16.6	1	1	1	0	0	0	0	0	1	0	0	0	0	0	0	0	1	0
NM_005729	10105	PPIF || peptidylprolyl isomerase F (cyclophilin F) (1)	2.4144	1.33242	0.551863	2.50373	0	0	2	4	1	1	0	1	0	0	0	1	1	-0.1786	-16.65	0	0	0	0	0	0	0	0	1	2	1	0	1	1	0	0	0	0
NM_003621	8495	PPFIBP2 || PTPRF interacting protein, binding protein 2 (liprin beta 2) (1)	2.39759	1.50921	0.629468	2.84115	0	0	2	2	2	2	2	0	0	0	0	0	1	-0.7594	-18.19	1	0	0	0	0	0	0	0	2	2	2	0	2	0	0	0	0	0
NM_021158	57761	TRIB3 || tribbles homolog 3 (Drosophila) (2)	2.39691	1.79408	0.748499	3.45099	0	0	2	2	1	0	0	1	0	0	0	1	0	-0.146	-18.63	0	0	0	0	0	0	0	0	0	2	0	0	1	1	0	0	0	0
NM_080652	90407	TMEM41A || transmembrane protein 41A (2)	2.38555	1.93788	0.812338	3.55009	0	0	1	0	0	0	0	0	0	0	0	0	0	NA	-16.64	1	1	1	0	0	0	0	0	0	1	0	0	0	0	0	0	1	0
NM_033414	90441	ZNF622 || zinc finger protein 622 (1)	2.37237	1.73971	0.733321	3.50365	0	0	0	0	0	0	0	0	0	0	0	0	0	NA	NA	1	0	0	0	0	0	0	0	0	0	0	0	0	0	0	0	0	0
NM_024779	79837	PIP5K2C || phosphatidylinositol-4-phosphate 5-kinase, type II, gamma (2)	2.3712	1.41142	0.595233	2.68609	0	0	2	1	1	0	0	1	0	0	0	1	0	-0.2605	-20.3	0	1	0	0	0	NA	NA	NA	0	2	0	0	1	1	0	0	0	0
NM_001042678	389	RHOC || ras homolog gene family, member C (1)	2.36703	1.60692	0.678876	3.03524	0	0	0	0	0	0	0	0	0	0	0	0	0	NA	NA	1	2	1	0	0	0	0	0	0	0	0	0	0	0	0	0	1	0
NM_002897	5937	RBMS1 || RNA binding motif, single stranded interacting protein 1 (2)	2.36654	1.93054	0.815764	3.81417	0	0	2	0	0	1	0	1	1	0	1	1	0	-0.1435	-19.76	0	0	0	0	0	0	0	0	1	2	1	1	0	0	0	0	0	0
NM_014319	23592	LEMD3 || LEM domain containing 3 (1)	2.35706	1.59508	0.676727	3.09138	0	0	1	3	1	1	1	1	1	0	0	1	0	-0.3348	-17.2	0	0	0	0	0	NA	NA	NA	1	1	1	1	1	1	0	0	0	0
NM_016125	51136	LOC51136 || PTD016 protein (1)	2.35691	1.80246	0.764754	3.63289	0	0	0	0	0	0	0	0	0	0	0	0	0	NA	NA	3	1	1	1	0	0	0	0	0	0	0	0	0	0	1	0	1	0
NM_004239	9321	TRIP11 || thyroid hormone receptor interactor 11 (1)	2.35121	1.71887	0.731061	3.50418	0	0	0	0	0	0	0	0	0	0	1	0	0	NA	NA	1	0	0	1	0	0	0	0	0	0	0	0	0	0	1	0	0	0
NM_002061	2730	GCLM || glutamate-cysteine ligase, modifier subunit (2)	2.34702	1.48204	0.631457	2.85395	0	0	0	0	0	0	0	0	0	0	0	0	0	NA	NA	0	0	0	0	0	1	1	1	0	0	0	0	0	0	0	0	0	0
NM_002498	4752	NEK3 || NIMA (never in mitosis gene a)-related kinase 3 (1)	2.3396	1.85221	0.791676	3.89827	0	0	0	0	0	0	0	0	0	0	0	0	0	NA	NA	3	2	1	1	0	0	1	0	0	0	0	0	0	0	1	1	1	0
NM_022171	6988	TCTA || T-cell leukemia translocation altered gene (2)	2.33574	1.69287	0.72477	3.55842	0	0	2	3	1	1	1	0	0	0	0	0	1	-0.3002	NA	0	0	0	0	0	0	0	0	1	2	1	0	1	0	0	0	0	0
NM_152707	8034	SLC25A16 || solute carrier family 25 (mitochondrial carrier; Graves disease autoantigen), member 16 (1)	2.32668	1.43017	0.614681	2.6435	0	0	0	0	0	0	0	0	0	0	0	0	0	NA	NA	1	1	1	1	1	0	0	0	0	0	0	0	0	0	0	0	0	0
NM_006303	7965	JTV1 || JTV1 gene (1)	2.32628	1.30979	0.563041	2.45948	0	0	0	0	0	0	0	0	0	0	0	0	0	NA	NA	0	1	0	0	0	0	0	0	0	0	0	0	0	0	0	0	0	0
NM_005827	10237	SLC35B1 || solute carrier family 35, member B1 (2)	2.32284	1.52021	0.654461	3.02512	0	0	0	0	0	0	0	0	0	0	0	0	0	NA	NA	1	0	0	1	0	0	0	0	0	0	0	0	0	0	1	1	0	0
NM_145251	6815	STYX || serine/threonine/tyrosine interacting protein (1)	2.31246	1.44883	0.626534	2.80677	0	0	1	1	1	0	0	1	0	0	0	1	0	-0.2595	NA	0	0	0	0	0	0	0	0	0	1	0	0	1	1	0	0	0	0
NM_012067	22977	AKR7A3 || aldo-keto reductase family 7, member A3 (aflatoxin aldehyde reductase) (1)	2.3086	1.58258	0.685516	3.10461	0	0	0	0	0	0	0	0	0	0	0	0	0	NA	NA	1	1	0	0	0	0	0	0	0	0	0	0	0	0	0	0	0	0
NM_019022	54495	TXNDC10 || thioredoxin domain containing 10 (1)	2.30513	1.53208	0.664641	3.06821	0	0	2	0	0	1	0	0	0	0	0	0	1	-0.0639	-19.11	0	1	0	0	0	0	0	0	1	2	1	0	0	0	0	0	0	0
NM_144706	150590	C2orf15 || chromosome 2 open reading frame 15 (1)	2.29925	1.78104	0.774618	3.54715	0	0	2	0	0	1	0	0	0	0	0	0	1	-0.1639	-18.96	0	0	0	0	0	0	0	0	1	2	1	0	0	0	0	0	0	0
NM_018719	55536	CDCA7L || cell division cycle associated 7-like (2)	2.29686	1.8475	0.804359	3.49899	0	0	1	2	1	1	1	0	0	0	0	0	1	-0.293	-18.3	0	0	0	0	0	0	0	0	2	1	1	0	1	0	0	0	0	0
NM_004776	9334	B4GALT5 || UDP-Gal:betaGlcNAc beta 1,4- galactosyltransferase, polypeptide 5 (1)	2.29527	1.60288	0.698339	3.33252	0	0	4	2	0	0	0	0	0	0	0	0	0	NA	-20.17	0	0	0	0	0	0	0	0	0	4	0	0	0	0	0	0	0	0
NM_007198	11212	PROSC || proline synthetase co-transcribed homolog (bacterial) (1)	2.29449	1.68255	0.7333	3.50846	0	0	2	0	0	1	0	0	0	0	0	0	1	-0.0896	-19.02	0	0	0	0	0	0	0	0	1	2	1	0	0	0	0	0	0	0
NM_006887	678	ZFP36L2 || zinc finger protein 36, C3H type-like 2 (1)	2.28983	2.13579	0.932731	5.05057	0	0	1	0	0	0	0	0	0	0	0	0	0	NA	-20.32	1	1	1	0	0	0	0	0	0	1	0	0	0	0	0	0	1	0
NM_198256	1876	E2F6 || E2F transcription factor 6 (2)	2.28762	1.61604	0.706429	3.03922	0	0	1	2	0	1	0	1	0	0	0	1	0	-0.1253	-17.21	0	0	0	0	0	0	0	0	1	1	1	1	0	0	0	0	0	0
NM_005443	9061	PAPSS1 || 3'-phosphoadenosine 5'-phosphosulfate synthase 1 (1)	2.28148	1.43958	0.630986	2.79962	0	0	1	0	0	1	0	0	0	0	0	0	1	-0.1476	-20.93	1	1	1	0	0	0	0	0	1	1	1	0	0	0	0	0	1	0
NM_002734	5573	PRKAR1A || protein kinase, cAMP-dependent, regulatory, type I, alpha (tissue specific extinguisher 1) (2)	2.2813	1.50562	0.659985	2.89488	0	0	1	1	0	0	0	0	0	0	0	0	0	NA	-17.29	0	0	0	0	0	0	0	0	1	1	0	0	0	0	0	0	0	0
NM_014048	57496	MKL2 || MKL/myocardin-like 2 (1)	2.277	1.39542	0.612831	2.73273	0	0	3	1	1	0	0	0	0	0	0	0	1	-0.0538	-17.04	2	0	0	0	0	0	0	0	2	3	0	0	1	0	0	0	0	0
NM_001008530	5641	LGMN || legumain (2)	2.27688	1.44033	0.632591	2.77116	0	0	0	0	0	0	0	0	0	0	0	0	0	NA	NA	1	2	1	0	0	0	0	0	0	0	0	0	0	0	0	0	1	0
NM_012388	26258	PLDN || pallidin homolog (mouse) (2)	2.27168	1.74067	0.766245	3.63118	0	0	6	1	1	1	1	1	0	0	1	1	0	-0.435	-24.63	0	0	0	0	0	0	0	0	1	6	1	1	1	1	0	0	0	0
NA	441019	na || hypothetical gene supported by X97260; BC070289 (1)	2.26653	1.76367	0.778134	3.18927	0	0	NA	NA	NA	NA	NA	0	0	0	0	0	0	NA	NA	NA	NA	NA	NA	NA	NA	NA	NA	NA	NA	NA	NA	NA	NA	NA	NA	NA	NA
NM_000182	3030	HADHA || hydroxyacyl-Coenzyme A dehydrogenase/3-ketoacyl-Coenzyme A thiolase/enoyl-Coenzyme A hydratase (trifunctional protein), alpha subunit (2)	2.26393	1.63596	0.722619	3.20315	0	0	1	1	1	0	0	1	0	0	0	1	0	-0.1881	-19.1	1	2	0	0	0	0	0	0	0	1	0	0	1	1	0	0	0	0
NM_017638	54797	MED18 || mediator of RNA polymerase II transcription, subunit 18 homolog (yeast) (1)	2.25897	1.37156	0.607163	2.58121	0	0	0	0	0	0	0	0	0	0	0	0	0	NA	NA	0	0	0	0	0	1	1	1	0	0	0	0	0	0	0	0	0	0
NM_015983	51619	UBE2D4 || ubiquitin-conjugating enzyme E2D 4 (putative) (1)	2.25709	1.30137	0.576573	2.44527	0	0	2	1	1	0	0	0	0	0	0	0	1	NA	-18.27	1	0	0	0	0	0	0	0	0	2	0	0	1	0	0	0	0	0
NM_001020818	91663	MYADM || myeloid-associated differentiation marker (1)	2.24838	1.55058	0.689645	3.14101	0	0	2	1	1	1	1	1	0	0	0	1	0	-0.204	-18.55	0	1	0	0	0	0	0	0	1	2	1	1	1	1	0	0	0	0
NM_017588	11091	WDR5 || WD repeat domain 5 (1)	2.23461	1.53412	0.68653	2.95291	0	0	1	1	0	0	0	0	0	0	0	0	0	NA	NA	0	3	0	0	0	0	0	0	0	1	0	0	0	0	0	0	0	0
NM_001078174	2030	SLC29A1 || solute carrier family 29 (nucleoside transporters), member 1 (1)	2.23302	2.08446	0.93347	5.23075	0	0	2	1	1	0	0	1	0	1	0	1	0	-0.2239	-20.1	3	1	1	0	0	0	0	0	0	2	0	0	1	1	0	0	1	0
NM_031934	83871	RAB34 || RAB34, member RAS oncogene family (1)	2.23149	1.64788	0.738468	3.22218	0	0	1	1	1	1	1	1	0	0	0	1	0	-0.4257	-20.36	0	1	0	0	0	0	0	0	1	1	1	1	1	1	0	0	0	0
NM_018214	55227	LRRC1 || leucine rich repeat containing 1 (4)	2.22845	1.87258	0.840308	3.71348	0	0	2	3	2	2	2	1	1	1	1	1	1	-0.6726	-22.67	2	0	0	0	0	0	0	0	2	2	2	1	2	2	0	0	0	0
NM_145648	121260	SLC15A4 || solute carrier family 15, member 4 (1)	2.22146	1.34067	0.603508	2.49311	0	0	1	1	1	1	1	1	0	0	1	1	0	-0.3527	-16.37	1	1	1	0	0	0	0	0	1	1	1	0	1	1	0	0	1	1
NM_016023	51633	CGI-77 || CGI-77 protein (2)	2.21946	1.4221	0.640744	2.79954	0	0	0	0	0	0	0	0	0	0	0	0	0	NA	-17.16	1	1	0	0	0	0	0	NA	2	0	0	0	0	0	0	0	0	0
NM_175871	126074	FLJ35119 || hypothetical protein FLJ35119 (1)	2.20994	1.65054	0.746873	3.09723	0	0	1	1	0	1	0	0	0	0	0	0	1	-0.1542	-22.68	1	0	0	1	0	NA	NA	NA	1	1	1	0	0	0	1	0	0	0
NM_001093771	7296	TXNRD1 || thioredoxin reductase 1 (1)	2.20769	1.559	0.70617	3.19293	0	0	1	1	1	0	0	0	0	0	0	0	1	-0.1821	-17.54	2	1	1	2	1	NA	NA	NA	0	1	0	0	1	0	2	0	1	0
NM_032121	84061	DKFZp564K142 || implantation-associated protein (3)	2.20503	1.45171	0.658363	2.7156	0	0	3	2	2	3	2	1	1	0	0	1	1	-1.052	-18.8	0	0	0	0	0	NA	NA	NA	3	3	3	2	2	2	0	0	0	0
NM_016486	51249	LOC51249 || hypothetical protein LOC51249 (2)	2.20217	1.60069	0.72687	3.25769	0	0	0	0	0	0	0	0	0	0	0	0	0	NA	NA	1	0	0	0	0	1	2	1	0	0	0	0	0	0	0	0	0	0
NM_013322	29887	SNX10 || sorting nexin 10 (1)	2.19965	1.7579	0.799176	3.15558	0	0	0	1	0	0	0	0	0	0	0	0	0	NA	-16.67	1	0	0	1	0	0	0	0	0	0	0	0	0	0	1	0	0	0
NM_001326	1479	CSTF3 || cleavage stimulation factor, 3' pre-RNA, subunit 3, 77kDa (1)	2.19823	1.67771	0.76321	3.53635	0	0	1	1	0	1	0	1	1	0	0	1	0	-0.1464	-21.57	2	3	0	1	0	0	0	0	1	1	1	1	0	0	1	1	0	0
NM_001449	2273	FHL1 || four and a half LIM domains 1 (1)	2.19112	1.31779	0.601425	2.52901	0	0	0	0	0	0	0	0	0	0	0	0	0	NA	-19.22	1	1	1	0	0	0	0	0	0	0	0	0	0	0	0	0	1	1
NM_001012732	1635	DCTD || dCMP deaminase (1)	2.1824	1.38558	0.63489	2.64151	0	0	1	1	0	0	0	0	0	0	1	0	0	NA	NA	2	0	0	0	0	0	0	0	0	1	0	0	0	0	0	0	0	0
NM_152420	138199	C9orf41 || chromosome 9 open reading frame 41 (1)	2.1751	1.43458	0.659548	2.79059	0	0	2	1	1	1	0	1	0	0	0	1	1	-0.2854	-23.9	1	0	0	0	0	0	0	0	2	2	1	0	1	1	0	0	0	0
NM_006361	10481	HOXB13 || homeo box B13 (1)	2.17361	1.71825	0.790504	3.1362	0	0	1	1	0	0	0	0	0	0	0	0	0	NA	-21.58	2	1	1	1	1	0	0	0	0	1	0	0	0	0	1	1	1	1
NM_001005861	6259	RYK || RYK receptor-like tyrosine kinase (1)	2.17204	1.65377	0.76139	3.13868	0	0	2	2	1	1	1	0	0	0	1	0	1	-0.3406	-21.3	1	1	0	1	0	0	0	0	1	2	1	0	1	0	1	0	0	0
NM_015391	25847	ANAPC13 || anaphase promoting complex subunit 13 (1)	2.16356	1.20942	0.558993	2.30048	0	0	0	0	0	0	0	0	0	0	0	0	0	NA	-17	1	0	0	1	0	0	0	0	0	0	0	0	0	0	1	0	0	0
NM_001098817	125476	C18orf37 || chromosome 18 open reading frame 37 (5)	2.16194	1.52812	0.70683	3.10335	0	0	1	1	1	0	0	0	0	0	1	0	0	NA	NA	2	2	1	0	0	0	0	0	0	1	0	0	1	0	0	0	1	0
NM_002069	2770	GNAI1 || guanine nucleotide binding protein (G protein), alpha inhibiting activity polypeptide 1 (1)	2.16028	1.86479	0.863217	3.84268	0	0	2	1	1	0	0	1	0	0	0	1	0	-0.3049	-19.73	0	0	0	0	0	0	0	0	0	2	0	0	1	1	0	0	0	0
NM_016332	51734	SEPX1 || selenoprotein X, 1 (2)	2.15485	1.50658	0.699161	2.84769	0	0	2	2	1	1	1	0	0	0	0	0	1	-0.3275	-18.12	0	0	0	0	0	0	0	0	1	2	1	0	1	0	0	0	0	0
NM_012425	6251	RSU1 || Ras suppressor protein 1 (1)	2.15281	1.47998	0.687462	2.67528	0	0	0	0	0	0	0	0	0	0	0	0	0	NA	NA	0	0	0	0	0	0	0	0	0	0	0	0	0	0	0	0	0	0
NM_153607	153222	LOC153222 || adult retina protein (2)	2.14889	1.83358	0.85327	3.28584	0	0	1	2	1	0	0	1	0	1	0	1	0	-0.2359	-18.24	2	0	0	0	0	0	0	0	0	1	0	0	1	1	0	0	0	0
NM_006754	6856	SYPL1 || synaptophysin-like 1 (2)	2.14465	1.33187	0.621021	2.48126	0	0	3	1	1	1	0	1	0	1	0	1	1	-0.3628	-19.89	0	0	0	0	0	0	0	0	2	3	1	0	1	1	0	0	0	0
NM_030791	81537	SGPP1 || sphingosine-1-phosphate phosphatase 1 (1)	2.1435	1.40162	0.653895	2.61368	0	0	1	2	1	0	0	1	0	0	0	1	0	-0.1891	-20.26	0	0	0	0	0	0	0	0	0	1	0	0	1	1	0	0	0	0
NM_020731	57491	AHRR || aryl-hydrocarbon receptor repressor (2)	2.14249	1.67912	0.783727	3.22753	0	0	1	3	1	0	0	0	0	0	1	0	1	-0.2993	-23.01	1	4	1	0	0	NA	NA	NA	1	1	0	0	1	0	0	0	1	0
NM_052936	115201	APG4A || APG4 autophagy 4 homolog A (S. cerevisiae) (2)	2.13956	1.86138	0.869979	3.74597	0	0	0	1	0	0	0	0	0	0	0	0	0	NA	NA	0	0	0	0	0	0	0	0	0	0	0	0	0	0	0	0	0	0
NM_004184	7453	WARS || tryptophanyl-tRNA synthetase (1)	2.12596	1.43204	0.673599	2.93881	0	0	0	0	0	0	0	0	0	0	0	0	0	NA	-17.11	1	1	1	1	1	0	0	0	0	0	0	0	0	0	1	0	1	0
NM_012302	23266	LPHN2 || latrophilin 2 (1)	2.12441	1.52615	0.718386	3.14278	0	0	1	1	0	0	0	0	0	0	0	0	0	NA	-16.98	1	2	0	0	0	0	0	0	1	1	0	0	0	0	0	0	0	0
NM_006628	10776	ARPP-19 || cyclic AMP phosphoprotein, 19 kD (2)	2.12084	1.36365	0.642974	2.56473	0	0	2	1	0	0	0	0	1	0	0	0	0	NA	-20.23	0	0	0	0	0	0	0	0	1	2	0	0	0	0	0	0	0	0
NM_006572	10672	GNA13 || guanine nucleotide binding protein (G protein), alpha 13 (2)	2.11943	1.41421	0.667258	2.69272	0	0	4	1	0	2	0	1	0	0	0	1	1	-0.2868	-19.52	0	0	0	0	0	NA	NA	NA	4	4	2	1	0	0	0	0	0	0
NM_025125	80195	C10orf57 || chromosome 10 open reading frame 57 (1)	2.11882	1.25479	0.592213	2.39493	0	0	1	2	1	0	0	0	0	0	0	0	1	-0.104	-21.99	0	0	0	0	0	NA	NA	NA	0	1	0	0	1	0	0	0	0	0
NM_006858	11018	TMED1 || transmembrane emp24 domain containing 1 (1)	2.11865	2.19796	1.03744	4.60956	0	0	1	1	1	1	1	1	0	0	0	1	0	-0.3744	-19.23	0	0	0	0	0	0	0	0	1	1	1	1	1	1	0	0	0	0
NM_001076680	201229	LOC201229 || hypothetical protein LOC201229 (2)	2.1141	1.43388	0.678243	2.62558	0	0	1	2	0	0	0	0	0	0	0	0	0	NA	-17.26	0	0	0	0	0	0	0	0	0	1	0	0	0	0	0	0	0	0
NM_032564	84649	DGAT2 || diacylglycerol O-acyltransferase homolog 2 (mouse) (1)	2.11374	1.47096	0.695903	2.73281	0	0	2	1	1	0	0	1	0	0	0	1	0	-0.1806	-17.55	1	1	1	0	0	0	0	0	0	2	0	0	1	1	0	0	1	1
NM_018062	55120	FANCL || Fanconi anemia, complementation group L (5)	2.10716	1.55412	0.737545	2.97816	0	0	0	0	0	0	0	0	0	0	0	0	0	NA	-17.42	1	1	0	1	0	0	0	0	0	0	0	0	0	0	1	0	0	0
NM_012280	24140	FTSJ1 || FtsJ homolog 1 (E. coli) (2)	2.10518	1.25367	0.595516	2.44629	0	0	0	0	0	0	0	0	0	0	0	0	0	NA	NA	1	1	1	0	0	0	0	0	1	0	0	0	0	0	0	0	1	0
NM_080764	140883	SUHW2 || suppressor of hairy wing homolog 2 (Drosophila) (1)	2.10226	1.39681	0.664432	2.79898	0	0	0	3	0	0	0	0	0	0	0	0	0	NA	NA	0	1	0	0	0	0	0	0	0	0	0	0	0	0	0	0	0	0
NM_181784	200734	SPRED2 || sprouty-related, EVH1 domain containing 2 (1)	2.09721	1.38979	0.662687	2.68127	0	0	0	1	0	0	0	0	0	0	0	0	0	NA	-20.63	1	0	0	0	0	0	0	0	1	0	0	0	0	0	0	0	0	0
NM_153371	222484	LNX2 || ligand of numb-protein X 2 (1)	2.09573	1.31958	0.629654	2.59465	0	0	1	1	1	0	0	0	0	0	0	0	1	-0.2291	-17.98	3	2	0	0	0	0	0	0	0	1	0	0	1	0	0	0	0	0
NM_021177	57819	LSM2 || LSM2 homolog, U6 small nuclear RNA associated (S. cerevisiae) (2)	2.09483	1.46179	0.697808	2.64419	0	0	1	0	0	0	0	0	0	0	0	0	0	NA	NA	0	0	0	0	0	0	0	0	0	1	0	0	0	0	0	0	0	0
NM_021198	58190	CTDSP1 || CTD (carboxy-terminal domain, RNA polymerase II, polypeptide A) small phosphatase 1 (2)	2.09393	1.81683	0.867669	3.32863	0	0	8	5	4	1	0	1	0	0	1	1	1	-0.6334	-19.87	0	0	0	0	0	0	0	0	1	8	1	0	4	4	0	0	0	0
NM_016001	51096	WDR50 || WD repeat domain 50 (2)	2.09281	1.45775	0.696551	2.77488	0	0	0	0	0	0	0	0	0	0	0	0	0	NA	NA	2	1	1	1	1	NA	NA	NA	0	0	0	0	0	0	1	0	1	0
NM_032497	84527	ZNF559 || zinc finger protein 559 (1)	2.09256	1.43321	0.684908	2.6816	0	0	1	0	0	1	0	0	0	0	0	0	1	-0.1265	-16.65	2	0	0	2	0	2	1	1	3	1	1	0	0	0	2	0	0	0
NM_006216	5270	SERPINE2 || serine (or cysteine) proteinase inhibitor, clade E (nexin, plasminogen activator inhibitor type 1), member 2 (1)	2.08698	1.62796	0.780056	3.08244	0	0	1	1	0	0	0	0	0	0	0	0	0	NA	-18.09	2	1	1	0	0	0	0	0	0	1	0	0	0	0	0	0	1	1
NM_014918	22856	CHSY1 || carbohydrate (chondroitin) synthase 1 (1)	2.08649	1.6066	0.769998	3.32834	0	0	3	1	1	1	1	1	1	1	1	1	0	-0.5388	-25.8	1	0	0	0	0	0	0	0	1	3	1	1	1	1	0	0	0	0
NM_001042452	51765	MASK || Mst3 and SOK1-related kinase (1)	2.07882	1.26767	0.6098	2.35798	0	0	2	2	1	0	0	1	0	0	0	1	0	-0.2414	-18.56	0	1	0	0	0	NA	NA	NA	0	2	0	0	1	1	0	0	0	0
NM_001718	654	BMP6 || bone morphogenetic protein 6 (1)	2.06293	1.66684	0.807996	3.63002	0	0	4	1	1	2	1	1	0	0	0	1	1	-0.556	-22.65	0	0	0	0	0	0	0	0	2	4	2	1	1	0	0	0	0	0
NM_080430	140606	SELM || selenoprotein M (1)	2.05712	1.43142	0.695836	2.8545	0	0	1	0	0	0	0	0	0	0	0	0	0	NA	NA	0	0	0	0	0	0	0	0	0	1	0	0	0	0	0	0	0	0
NM_018155	55186	FLJ10618 || hypothetical protein FLJ10618 (2)	2.05533	1.62312	0.789716	3.3607	0	0	1	0	0	0	0	0	0	0	0	0	0	NA	-21.92	0	0	0	0	0	0	0	0	0	1	0	0	0	0	0	0	0	0
NM_000235	3988	LIPA || lipase A, lysosomal acid, cholesterol esterase (Wolman disease) (1)	2.04299	1.38938	0.68007	2.77103	0	0	1	0	0	1	0	0	0	0	0	0	1	-0.0802	-18.95	1	1	1	1	1	0	0	0	1	1	1	0	0	0	1	0	1	0
NM_001018159	8883	APPBP1 || amyloid beta precursor protein binding protein 1 (3)	2.0417	1.55554	0.761885	2.9621	0	0	1	0	0	0	0	0	0	0	0	0	0	NA	-17.46	1	1	1	1	1	0	0	0	0	1	0	0	0	0	1	1	1	1
NM_003012	6422	SFRP1 || secreted frizzled-related protein 1 (1)	2.04128	1.45188	0.711256	2.82334	0	0	3	2	0	0	0	0	0	0	0	0	0	NA	NA	0	0	0	0	0	0	0	0	0	3	0	0	0	0	0	0	0	0
NM_032997	11130	ZWINT || ZW10 interactor (2)	2.03962	1.255	0.615309	2.40817	0	0	1	1	1	1	1	0	0	0	0	0	1	-0.4796	-19.59	0	0	0	0	0	NA	NA	NA	1	1	1	0	1	0	0	0	0	0
NM_005911	4144	MAT2A || methionine adenosyltransferase II, alpha (2)	2.03711	1.26523	0.62109	2.36326	0	0	1	1	1	0	0	1	0	1	0	1	0	-0.3079	-19.77	3	2	1	0	0	0	0	0	0	1	0	0	1	1	0	0	1	0
NM_012329	23531	MMD || monocyte to macrophage differentiation-associated (1)	2.03423	1.22667	0.603011	2.30839	0	0	3	0	0	0	0	0	0	0	0	0	0	NA	-22.38	0	0	0	0	0	0	0	0	0	3	0	0	0	0	0	0	0	0
NM_023943	66000	MGC3040 || hypothetical protein MGC3040 (2)	2.03285	1.27229	0.625865	2.36736	0	0	0	0	0	0	0	0	0	0	0	0	0	NA	NA	2	1	1	0	0	0	0	0	0	0	0	0	0	0	0	0	1	1
NM_022121	64065	PERP || PERP, TP53 apoptosis effector (1)	2.02979	1.21946	0.600781	2.36825	0	0	0	0	0	0	0	0	0	0	0	0	0	NA	-17.59	2	1	1	0	0	0	0	0	0	0	0	0	0	0	0	0	1	0
NM_002826	5768	QSCN6 || quiescin Q6 (1)	2.02527	1.69813	0.83847	3.57416	0	0	3	2	2	1	1	1	0	0	0	1	1	-0.4142	-17.59	0	0	0	0	0	0	0	0	1	3	1	0	2	1	0	0	0	0
NM_007353	2768	GNA12 || guanine nucleotide binding protein (G protein) alpha 12 (1)	2.02295	1.56062	0.771461	2.91151	0	0	3	5	1	0	0	0	0	0	0	0	1	-0.0524	-17	0	0	0	0	0	0	1	0	0	3	0	0	1	0	0	0	0	0
NM_001078650	80194	FLJ21749 || hypothetical protein FLJ21749 (1)	2.01962	2.21075	1.09463	6.31281	0	0	1	1	1	1	1	1	0	0	0	1	0	-0.325	-17.67	1	1	0	0	0	0	0	0	1	1	1	1	1	1	0	0	0	0
NM_001219	813	CALU || calumenin (3)	2.01559	1.37579	0.682575	2.52325	0	0	3	1	1	0	0	1	0	0	0	1	0	-0.2456	-19.31	2	1	0	0	0	0	0	0	1	3	0	0	1	1	0	0	0	0
NM_001343	1601	DAB2 || disabled homolog 2, mitogen-responsive phosphoprotein (Drosophila) (1)	2.01284	1.40037	0.695721	2.62044	0	0	2	0	0	1	0	0	0	0	0	0	1	-0.0959	-18.26	4	2	1	1	0	1	0	0	2	2	1	0	0	0	1	0	1	0
NM_017613	29980	DONSON || downstream neighbor of SON (2)	2.00764	1.3459	0.670388	2.51789	0	0	0	0	0	0	0	0	0	0	0	0	0	NA	NA	1	0	0	0	0	0	0	0	0	0	0	0	0	0	0	0	0	0
NA	55180	LINS1 || lines homolog 1 (Drosophila) (1)	2.00708	1.55056	0.772548	2.95557	0	0	NA	NA	NA	NA	NA	0	0	0	0	0	0	NA	NA	NA	NA	NA	NA	NA	NA	NA	NA	NA	NA	NA	NA	NA	NA	NA	NA	NA	NA
NM_018075	55129	FLJ10375 || hypothetical protein FLJ10375 (1)	2.00599	1.23663	0.616465	2.35997	0	0	0	0	0	0	0	0	0	0	0	0	0	NA	NA	3	2	0	1	0	0	0	0	0	0	0	0	0	0	1	0	0	0
NM_033161	6836	SURF4 || surfeit 4 (1)	2.00305	1.34788	0.672912	2.47211	0	0	3	0	0	2	0	1	0	0	0	1	0	-0.1293	NA	0	0	0	0	0	0	0	0	2	3	2	2	0	0	0	0	0	0
NM_172240	282809	WDR51B || WD repeat domain 51B (1)	2.00239	1.48925	0.743735	2.99231	0	0	2	1	1	0	0	0	0	0	0	0	1	-0.3026	-21.39	1	0	0	0	0	0	0	0	0	2	0	0	1	0	0	0	0	0
NM_004048	567	B2M || beta-2-microglobulin (37)	2.00088	1.31727	0.658347	2.54284	0	0	0	0	0	0	0	0	0	0	0	0	0	NA	NA	0	0	0	0	0	0	0	0	0	0	0	0	0	0	0	0	0	0
NM_014168	29081	METTL5 || methyltransferase like 5 (3)	2.00082	1.67234	0.835826	3.0759	0	0	0	0	0	0	0	0	0	0	0	0	0	NA	NA	0	0	0	0	0	1	1	1	0	0	0	0	0	0	0	0	0	0
NM_000505	2161	F12 || coagulation factor XII (Hageman factor) (1)	1.9976	1.52063	0.761225	2.9519	0	0	0	0	0	0	0	0	0	0	0	0	0	NA	-18.21	0	2	0	0	0	NA	NA	NA	0	0	0	0	0	0	0	0	0	0
NM_006117	10455	PECI || peroxisomal D3,D2-enoyl-CoA isomerase (1)	1.99541	1.61552	0.809619	3.53206	0	0	1	1	1	0	0	0	0	0	1	0	1	-0.312	-16.2	1	0	0	0	0	0	0	0	0	1	0	0	1	0	0	0	0	0
NM_032471	5570	PKIB || protein kinase (cAMP-dependent, catalytic) inhibitor beta (3)	1.99497	1.13971	0.57129	2.18811	0	0	0	1	0	0	0	0	0	0	0	0	0	NA	NA	1	0	0	1	0	0	0	0	0	0	0	0	0	0	1	0	0	0
NM_003254	7076	TIMP1 || tissue inhibitor of metalloproteinase 1 (erythroid potentiating activity, collagenase inhibitor) (1)	1.99176	1.39471	0.70024	2.62066	0	0	0	0	0	0	0	0	0	0	0	0	0	NA	NA	0	0	0	0	0	0	0	0	0	0	0	0	0	0	0	0	0	0
NM_012346	23636	NUP62 || nucleoporin 62kDa (2)	1.99112	1.10183	0.553374	2.14654	0	0	1	1	0	0	0	0	0	0	0	0	0	NA	-17.41	1	0	0	0	0	0	0	0	0	1	0	0	0	0	0	0	0	0
NM_002805	5705	PSMC5 || proteasome (prosome, macropain) 26S subunit, ATPase, 5 (3)	1.98691	1.6995	0.855346	3.6619	0	0	0	0	0	0	0	0	0	0	0	0	0	NA	NA	0	0	0	0	0	NA	NA	NA	0	0	0	0	0	0	0	0	0	0
NM_016101	51388	CGI-37 || comparative gene identification transcript 37 (2)	1.9836	1.32046	0.665687	2.65348	0	0	1	2	1	0	0	0	0	0	0	0	1	-0.2221	-18.74	0	0	0	0	0	0	0	0	0	1	0	0	1	0	0	0	0	0
NM_015920	51065	RPS27L || ribosomal protein S27-like (1)	1.98248	1.25905	0.63509	2.37215	0	0	1	0	0	0	0	0	0	0	0	0	0	NA	-23.43	1	0	0	0	0	0	0	0	1	1	0	0	0	0	0	0	0	0
NM_022764	64779	FLJ12998 || hypothetical protein FLJ12998 (1)	1.98008	1.34881	0.681192	2.52401	0	0	1	2	1	1	1	0	0	0	0	0	1	-0.2697	-18.09	0	0	0	0	0	0	0	0	2	1	1	0	1	0	0	0	0	0
NM_006242	5509	PPP1R3D || protein phosphatase 1, regulatory subunit 3D (1)	1.97895	1.42052	0.717814	2.66382	0	0	2	1	1	0	0	1	0	0	0	1	0	-0.2058	-19.15	0	1	0	0	0	0	0	0	0	2	0	0	1	1	0	0	0	0
NM_016647	51337	LOC51337 || mesenchymal stem cell protein DSCD75 (1)	1.96657	1.73251	0.880983	3.09853	0	0	2	3	0	1	0	0	0	0	0	0	1	-0.0295	-16.81	0	0	0	0	0	0	0	0	1	2	1	0	0	0	0	0	0	0
NM_001100164	9749	PHACTR2 || phosphatase and actin regulator 2 (2)	1.96255	1.80604	0.920251	3.57234	0	0	3	3	1	2	1	0	0	0	0	0	0	NA	-18.84	1	4	0	1	0	0	0	0	2	3	2	1	1	1	1	1	0	0
NM_138355	90507	SCRN2 || secernin 2 (1)	1.95547	1.67846	0.858339	2.92677	0	0	1	0	0	1	0	0	0	0	0	0	1	-0.0935	-20.21	1	1	1	0	0	NA	NA	NA	1	1	1	0	0	0	0	0	1	0
NM_198157	7332	UBE2L3 || ubiquitin-conjugating enzyme E2L 3 (2)	1.9505	1.26913	0.650668	2.41215	0	0	2	0	0	0	0	0	0	0	0	0	0	NA	-19.55	0	0	0	0	0	0	0	0	0	2	0	0	0	0	0	0	0	0
NM_005730	10106	CTDSP2 || CTD (carboxy-terminal domain, RNA polymerase II, polypeptide A) small phosphatase 2 (1)	1.94989	1.431	0.733888	2.82289	0	0	5	5	1	1	0	1	0	0	1	1	1	-0.2047	-16.92	0	2	0	0	0	0	0	0	1	5	1	0	1	0	0	0	0	0
NM_002582	5073	PARN || poly(A)-specific ribonuclease (deadenylation nuclease) (2)	1.94899	1.59542	0.818588	3.46584	0	0	0	1	0	0	0	0	0	0	0	0	0	NA	NA	1	1	1	0	0	0	0	0	0	0	0	0	0	0	0	0	1	0
NM_144570	90861	C16orf34 || chromosome 16 open reading frame 34 (1)	1.94557	1.12621	0.578859	2.24958	0	0	3	3	1	0	0	0	0	0	0	0	1	-0.0685	-19.76	0	0	0	0	0	NA	NA	NA	2	3	0	0	1	0	0	0	0	0
NM_005595	4774	NFIA || nuclear factor I/A (1)	1.94492	1.64246	0.844487	3.85526	0	0	0	0	0	0	0	0	0	0	0	0	0	NA	NA	0	1	0	0	0	0	0	0	0	0	0	0	0	0	0	0	0	0
NM_020639	54101	RIPK4 || receptor-interacting serine-threonine kinase 4 (1)	1.94289	1.46621	0.754655	3.08594	0	0	2	3	2	0	0	0	0	0	0	0	1	-0.4386	-21.55	0	1	0	0	0	NA	NA	NA	0	2	0	0	2	0	0	0	0	0
NM_006751	6744	SSFA2 || sperm specific antigen 2 (1)	1.93921	1.39604	0.719901	2.61823	0	0	1	1	1	1	1	0	0	0	1	0	1	-0.4489	-23.8	2	1	1	0	0	0	0	0	1	1	1	0	1	0	0	0	1	1
NM_144598	123355	LRRC28 || leucine rich repeat containing 28 (1)	1.9392	1.18204	0.609551	2.23652	0	0	1	0	0	0	0	0	0	0	0	0	0	NA	-19.52	2	1	1	1	0	0	1	0	0	1	0	0	0	0	1	1	1	1
NM_007069	11145	HRASLS3 || HRAS-like suppressor 3 (1)	1.93836	1.11275	0.574069	2.13927	0	0	0	0	0	0	0	0	0	0	0	0	0	NA	NA	0	0	0	0	0	0	1	0	0	0	0	0	0	0	0	0	0	0
NM_001077195	80818	ZNF436 || zinc finger protein 436 (1)	1.9372	1.37113	0.707786	2.82032	0	0	1	1	0	0	0	0	0	0	0	0	0	NA	-17.94	0	0	0	0	0	0	0	0	0	1	0	0	0	0	0	0	0	0
NA	11104	KATNA1 || katanin p60 (ATPase-containing) subunit A 1 (1)	1.93338	1.57373	0.813977	3.16158	0	0	NA	NA	NA	NA	NA	0	0	1	1	0	0	NA	NA	NA	NA	NA	NA	NA	NA	NA	NA	NA	NA	NA	NA	NA	NA	NA	NA	NA	NA
NM_153367	219654	C10orf56 || chromosome 10 open reading frame 56 (2)	1.92954	1.89287	0.980993	4.28836	0	0	4	3	1	2	1	1	1	0	1	1	1	-0.3724	-17.79	1	0	0	0	0	0	0	0	2	4	2	1	1	1	0	0	0	0
NM_014452	27242	TNFRSF21 || tumor necrosis factor receptor superfamily, member 21 (1)	1.92479	1.46142	0.759262	3.04947	0	0	2	0	0	0	0	0	0	0	1	0	0	NA	-22.52	2	1	1	0	0	0	0	0	0	2	0	0	0	0	0	0	1	1
NM_001040613	54968	FLJ20533 || hypothetical protein FLJ20533 (1)	1.92108	1.17456	0.611406	2.23127	0	0	1	1	0	0	0	0	0	0	0	0	0	NA	-18.49	0	0	0	0	0	0	0	0	1	1	0	0	0	0	0	0	0	0
NM_153448	80712	ESX1L || extraembryonic, spermatogenesis, homeobox 1-like (1)	1.91988	1.20683	0.6286	2.27514	0	0	0	0	0	0	0	0	0	0	0	0	0	NA	NA	0	1	0	0	0	0	0	0	0	0	0	0	0	0	0	0	0	0
NM_000270	4860	NP || nucleoside phosphorylase (2)	1.91833	1.2834	0.669016	2.35259	0	0	2	1	0	1	0	0	0	0	0	0	1	-0.1717	-19.45	0	0	0	0	0	0	0	0	2	2	1	0	0	0	0	0	0	0
NM_001008397	493869	LOC493869 || similar to RIKEN cDNA 2310016C16 (1)	1.91533	1.19938	0.626196	2.34977	0	0	1	1	0	0	0	0	0	0	0	0	0	NA	NA	1	0	0	0	0	NA	NA	NA	0	1	0	0	0	0	0	0	0	0
NM_012405	23463	ICMT || isoprenylcysteine carboxyl methyltransferase (2)	1.91406	1.2591	0.657819	2.3656	0	0	1	3	0	1	0	1	0	0	0	1	0	-0.0247	NA	1	0	0	0	0	0	0	0	2	1	1	1	0	0	0	0	0	0
NM_152573	158158	RASEF || RAS and EF hand domain containing (1)	1.91405	1.23517	0.645314	2.45568	0	0	0	0	0	0	0	0	0	0	0	0	0	NA	NA	0	0	0	0	0	0	1	0	0	0	0	0	0	0	0	0	0	0
NM_030802	81558	LOC81558 || C/EBP-induced protein (1)	1.91295	1.16642	0.609748	2.25925	0	0	2	1	1	0	0	1	0	0	0	1	0	-0.1351	-17.13	1	1	0	0	0	0	0	0	0	2	0	0	1	1	0	0	0	0
NM_003761	8673	VAMP8 || vesicle-associated membrane protein 8 (endobrevin) (2)	1.91243	1.84075	0.96252	3.24154	0	0	0	0	0	0	0	0	0	0	0	0	0	NA	NA	1	1	1	0	0	0	0	0	0	0	0	0	0	0	0	0	1	0
NM_000098	1376	CPT2 || carnitine palmitoyltransferase II (1)	1.912	1.0975	0.574007	2.11713	0	0	0	1	0	0	0	0	0	0	0	0	0	NA	NA	3	1	1	2	0	0	1	0	0	0	0	0	0	0	2	0	1	0
NM_001660	378	ARF4 || ADP-ribosylation factor 4 (2)	1.90877	1.14817	0.601521	2.25788	0	0	0	0	0	0	0	0	0	0	0	0	0	NA	-21.17	0	0	0	0	0	0	0	0	0	0	0	0	0	0	0	0	0	0
NM_013323	29916	SNX11 || sorting nexin 11 (1)	1.9072	1.02871	0.539382	2.03177	0	0	0	0	0	0	0	0	0	0	0	0	0	NA	-16.36	1	3	1	0	0	0	0	0	0	0	0	0	0	0	0	0	1	0
NM_139014	1432	MAPK14 || mitogen-activated protein kinase 14 (3)	1.90438	1.40817	0.739436	2.69305	0	0	1	2	1	1	1	1	1	0	1	1	0	-0.4225	-18.33	0	0	0	0	0	0	0	0	1	1	1	1	1	1	0	0	0	0
NM_005389	5110	PCMT1 || protein-L-isoaspartate (D-aspartate) O-methyltransferase (3)	1.90365	1.30475	0.685395	2.38472	0	0	0	0	0	0	0	0	0	0	0	0	0	NA	NA	1	1	1	0	0	0	0	0	0	0	0	0	0	0	0	0	1	1
NM_032927	85013	MGC13159 || hypothetical protein MGC13159 (2)	1.90282	1.34371	0.706165	2.52818	0	0	1	2	1	0	0	0	0	0	0	0	1	-0.2809	-17.28	1	1	1	0	0	1	0	0	0	1	0	0	1	0	0	0	1	0
NM_005950	4495	MT1G || metallothionein 1G (2)	1.90261	1.51929	0.79853	2.81511	0	0	0	0	0	0	0	0	0	0	0	0	0	NA	NA	0	0	0	0	0	0	0	0	0	0	0	0	0	0	0	0	0	0
NM_001085354	79710	ZCWCC2 || zinc finger, CW type with coiled-coil domain 2 (1)	1.90258	1.38833	0.729712	2.75843	0	0	2	0	0	1	0	1	0	0	0	0	0	NA	-18.24	1	1	1	1	1	0	0	0	1	2	1	1	0	0	1	0	1	0
NM_005749	10140	TOB1 || transducer of ERBB2, 1 (1)	1.89994	1.63625	0.861213	3.82794	0	0	0	0	0	0	0	0	0	1	0	0	0	NA	-17.23	1	0	0	0	0	NA	NA	NA	0	0	0	0	0	0	0	0	0	0
NM_022091	10973	ASCC3 || activating signal cointegrator 1 complex subunit 3 (1)	1.89956	1.50042	0.789876	3.06673	0	0	1	0	0	1	0	0	0	0	0	0	1	-0.1087	-16.27	0	0	0	0	0	0	0	0	2	1	1	0	0	0	0	0	0	0
NM_005192	1033	CDKN3 || cyclin-dependent kinase inhibitor 3 (CDK2-associated dual specificity phosphatase) (3)	1.89524	1.20388	0.63521	2.26443	0	0	0	0	0	0	0	0	0	0	0	0	0	NA	NA	1	0	0	1	0	0	0	0	0	0	0	0	0	0	1	0	0	0
NM_001040197	57085	AGTRAP || angiotensin II receptor-associated protein (2)	1.89518	1.46513	0.773081	2.72107	0	0	0	3	0	0	0	0	0	0	0	0	0	NA	NA	0	0	0	0	0	0	0	0	0	0	0	0	0	0	0	0	0	0
NM_013388	10113	PREB || prolactin regulatory element binding (1)	1.89407	1.13832	0.60099	2.22082	0	0	1	0	0	0	0	0	0	0	0	0	0	NA	NA	1	3	1	0	0	0	0	0	0	1	0	0	0	0	0	0	1	0
NM_001390	1837	DTNA || dystrobrevin, alpha (4)	1.89154	1.21625	0.642993	2.31102	0	0	2	1	0	1	0	1	1	0	0	1	0	0.0306	-21.58	0	0	0	0	0	0	0	0	2	2	1	1	0	0	0	0	0	0
NM_018257	55251	C20orf36 || chromosome 20 open reading frame 36 (1)	1.89023	1.35375	0.716183	2.7303	0	0	2	0	0	0	0	0	0	0	0	0	0	NA	-17.81	0	0	0	0	0	0	0	0	0	2	0	0	0	0	0	0	0	0
NA	375601	OR7E31P || olfactory receptor, family 7, subfamily E, member 31 pseudogene (3)	1.88872	1.31746	0.69754	2.39975	0	0	NA	NA	NA	NA	NA	0	0	0	0	0	0	NA	NA	NA	NA	NA	NA	NA	NA	NA	NA	NA	NA	NA	NA	NA	NA	NA	NA	NA	NA
NM_000523	3239	HOXD13 || homeo box D13 (1)	1.8886	1.41392	0.74866	2.4934	0	0	1	0	0	0	0	0	0	0	0	0	0	NA	-18.42	1	1	1	1	1	0	0	0	0	1	0	0	0	0	1	0	1	0
NM_001040402	23142	KIAA0276 || KIAA0276 protein (1)	1.88826	1.15596	0.612183	2.29202	0	0	2	1	1	0	0	0	0	0	0	0	1	-0.1212	NA	0	0	0	0	0	0	0	0	1	2	0	0	1	0	0	0	0	0
NM_017802	54919	FLJ20397 || hypothetical protein FLJ20397 (2)	1.88712	1.11075	0.588597	2.15931	0	0	0	1	0	0	0	0	0	0	0	0	0	NA	NA	0	1	0	0	0	NA	NA	NA	0	0	0	0	0	0	0	0	0	0
NM_016060	51003	MED31 || mediator of RNA polymerase II transcription, subunit 31 homolog (yeast) (2)	1.88006	1.07727	0.572997	2.12985	0	0	0	0	0	0	0	0	0	0	0	0	0	NA	-18.54	0	0	0	0	0	0	0	0	0	0	0	0	0	0	0	0	0	0
NM_024887	79947	DHDDS || dehydrodolichyl diphosphate synthase (3)	1.87964	1.02195	0.543696	2.02721	0	0	1	1	1	0	0	0	0	0	0	0	1	-0.1392	NA	0	1	0	0	0	0	0	0	0	1	0	0	1	0	0	0	0	0
NM_031307	83480	PUS3 || pseudouridylate synthase 3 (1)	1.8754	1.74775	0.931934	3.91219	0	0	1	1	1	0	0	0	0	0	0	0	1	-0.2461	-20.83	3	2	2	0	0	0	0	0	0	1	0	0	1	0	0	0	2	1
NM_017768	55631	LRRC40 || leucine rich repeat containing 40 (1)	1.87366	1.32486	0.707098	2.43623	0	0	0	0	0	0	0	0	0	0	0	0	0	NA	NA	0	1	0	0	0	0	0	0	0	0	0	0	0	0	0	0	0	0
NA	55522	ILK-2 || integrin-linked kinase-2 (1)	1.87237	1.27246	0.679596	2.60065	0	0	NA	NA	NA	NA	NA	0	0	0	0	0	0	NA	NA	NA	NA	NA	NA	NA	NA	NA	NA	NA	NA	NA	NA	NA	NA	NA	NA	NA	NA
NM_003380	7431	VIM || vimentin (8)	1.8707	1.37338	0.73415	2.70173	0	0	1	1	1	0	0	1	0	0	0	1	0	-0.2665	-17.13	1	0	0	0	0	0	0	0	0	1	0	0	1	1	0	0	0	0
NM_001040181	56650	C3orf4 || chromosome 3 open reading frame 4 (1)	1.86877	1.48404	0.794127	2.90527	0	0	1	1	1	0	0	0	0	0	0	1	0	-0.2197	-18.93	0	0	0	0	0	0	0	0	0	1	0	0	1	1	0	0	0	0
NM_153208	124152	MGC35048 || hypothetical protein MGC35048 (1)	1.86841	1.146	0.613355	2.24946	0	0	0	1	0	0	0	0	0	0	0	0	0	NA	NA	0	0	0	0	0	0	0	0	0	0	0	0	0	0	0	0	0	0
NM_138992	25825	BACE2 || beta-site APP-cleaving enzyme 2 (3)	1.86491	1.08175	0.580054	2.09464	0	0	2	1	0	0	0	0	0	0	0	0	0	NA	-22.1	0	0	0	0	0	0	0	0	0	2	0	0	0	0	0	0	0	0
NM_031942	83879	CDCA7 || cell division cycle associated 7 (1)	1.86278	1.22454	0.657372	2.36333	0	0	2	1	1	0	0	0	0	0	1	0	1	-0.2936	-18.72	1	0	0	0	0	0	0	0	0	2	0	0	1	0	0	0	0	0
NM_024584	79635	FLJ13646 || hypothetical protein FLJ13646 (2)	1.86257	1.35329	0.72657	2.77041	0	0	1	1	1	0	0	0	0	0	0	0	1	-0.3021	-20.23	0	1	0	0	0	0	0	0	0	1	0	0	1	0	0	0	0	0
NM_005627	6446	SGK || serum/glucocorticoid regulated kinase (2)	1.85681	1.47825	0.796125	2.55708	0	0	1	1	1	0	0	1	0	0	0	1	0	-0.2699	-19.83	1	2	1	0	0	0	0	0	1	1	0	0	1	1	0	0	1	0
NM_017814	54929	FLJ20422 || hypothetical protein FLJ20422 (2)	1.85642	1.72012	0.926584	3.45015	0	0	0	1	0	0	0	0	0	0	0	0	0	NA	NA	3	4	1	0	0	NA	NA	NA	0	0	0	0	0	0	0	0	1	0
NM_006577	10678	B3GNT1 || UDP-GlcNAc:betaGal beta-1,3-N-acetylglucosaminyltransferase 1 (1)	1.85524	1.0775	0.580786	2.12914	0	0	1	1	0	0	0	0	0	0	0	0	0	NA	-16.47	1	1	1	0	0	0	0	0	0	1	0	0	0	0	0	0	1	1
NA	55672	FLJ20719 || hypothetical protein FLJ20719 (1)	1.85032	1.13712	0.614555	2.18651	0	0	NA	NA	NA	NA	NA	0	0	0	0	0	0	NA	NA	NA	NA	NA	NA	NA	NA	NA	NA	NA	NA	NA	NA	NA	NA	NA	NA	NA	NA
NA	286044	LOC286044 || hypothetical protein LOC286044 (1)	1.84974	1.23454	0.667414	2.38869	0	0	NA	NA	NA	NA	NA	0	0	0	0	0	0	NA	NA	NA	NA	NA	NA	NA	NA	NA	NA	NA	NA	NA	NA	NA	NA	NA	NA	NA	NA
NM_014481	27301	APEX2 || APEX nuclease (apurinic/apyrimidinic endonuclease) 2 (1)	1.84648	1.41037	0.76382	2.71497	0	0	1	1	1	1	1	0	0	0	1	0	1	-0.388	-19.06	0	1	0	0	0	0	0	0	1	1	1	0	1	0	0	0	0	0
NM_001081491	10482	NXF1 || nuclear RNA export factor 1 (1)	1.84364	1.14883	0.623132	2.25616	0	0	7	1	1	0	0	0	0	0	0	0	0	NA	-25.38	0	0	0	0	0	0	0	0	0	7	0	0	1	1	0	0	0	0
NM_000373	7372	UMPS || uridine monophosphate synthetase (orotate phosphoribosyl transferase and orotidine-5'-decarboxylase) (2)	1.84027	1.24429	0.676145	2.32889	0	0	0	0	0	0	0	0	0	0	0	0	0	NA	NA	2	2	1	1	1	0	0	0	0	0	0	0	0	0	1	0	1	0
NM_016016	51629	CGI-69 || CGI-69 protein (1)	1.83786	1.31767	0.716957	2.39362	0	0	1	1	1	0	0	1	0	0	0	1	0	-0.2107	-16.16	2	2	0	0	0	0	0	0	0	1	0	0	1	1	0	0	0	0
NM_207306	57212	KIAA0495 || KIAA0495 (1)	1.8365	1.20308	0.655097	2.42689	0	0	4	1	1	0	0	0	0	0	0	0	1	-0.0271	-18.45	0	0	0	0	0	1	1	0	1	4	0	0	1	0	0	0	0	0
NM_000522	3209	HOXA13 || homeo box A13 (1)	1.83447	1.4125	0.769979	3.01724	0	0	0	0	0	0	0	0	0	0	0	0	0	NA	NA	1	1	1	1	1	NA	NA	NA	0	0	0	0	0	0	1	0	1	0
NM_001500	2762	GMDS || GDP-mannose 4,6-dehydratase (1)	1.83288	1.34787	0.735385	2.49858	0	0	0	0	0	0	0	0	0	0	0	0	0	NA	NA	1	0	0	0	0	0	0	0	0	0	0	0	0	0	0	0	0	0
NM_002703	5471	PPAT || phosphoribosyl pyrophosphate amidotransferase (2)	1.82642	1.22746	0.672058	2.46541	0	0	1	1	0	0	0	0	0	0	0	0	0	NA	-18.49	0	0	0	0	0	0	0	0	1	1	0	0	0	0	0	0	0	0
NM_013995	3920	LAMP2 || lysosomal-associated membrane protein 2 (4)	1.82491	1.08058	0.592131	2.14227	0	0	1	1	0	0	0	0	0	0	0	0	0	NA	-19.8	1	0	0	0	0	0	0	0	1	1	0	0	0	0	0	0	0	0
NM_004869	9525	VPS4B || vacuolar protein sorting 4B (yeast) (1)	1.82437	1.44775	0.793562	2.76626	0	0	2	1	1	0	0	1	0	0	0	1	0	-0.2252	NA	0	0	0	0	0	0	0	0	0	2	0	0	1	1	0	0	0	0
NM_005953	4502	MT2A || metallothionein 2A (2)	1.82255	1.49633	0.821012	2.63787	0	0	0	0	0	0	0	0	0	0	0	0	0	NA	NA	0	0	0	0	0	0	0	0	0	0	0	0	0	0	0	0	0	0
NM_005702	26284	ERAL1 || Era G-protein-like 1 (E. coli) (2)	1.82182	1.42913	0.78445	2.88626	0	0	1	0	0	1	0	0	0	0	0	0	1	-0.0587	-16.52	1	1	1	1	1	NA	NA	NA	1	1	1	0	0	0	1	0	1	0
NM_017953	54680	FLJ20729 || hypothetical protein FLJ20729 (1)	1.81568	1.546	0.851473	3.72694	0	0	1	1	1	0	0	0	0	0	0	0	1	-0.2302	-22.38	0	0	0	0	0	0	0	0	0	1	0	0	1	0	0	0	0	0
NM_014445	27230	SERP1 || stress-associated endoplasmic reticulum protein 1 (1)	1.81456	1.7025	0.938244	3.38348	0	0	3	2	2	1	1	1	0	1	1	1	0	-0.4753	-24.46	0	0	0	0	0	0	0	0	1	3	1	1	2	2	0	0	0	0
NM_004515	3608	ILF2 || interleukin enhancer binding factor 2, 45kDa (2)	1.8125	1.29771	0.715978	2.42571	0	0	0	0	0	0	0	0	0	0	0	0	0	NA	NA	1	1	1	1	1	0	0	0	0	0	0	0	0	0	1	0	1	0
NA	157708	SEC11L2 || SEC11-like 2 (S. cerevisiae) (1)	1.81002	1.34558	0.743408	2.5399	0	0	NA	NA	NA	NA	NA	0	0	0	0	0	0	NA	NA	NA	NA	NA	NA	NA	NA	NA	NA	NA	NA	NA	NA	NA	NA	NA	NA	NA	NA
NM_012216	11043	MID2 || midline 2 (2)	1.80742	0.9683	0.535736	1.95834	0	0	0	0	0	0	0	0	0	0	0	0	0	NA	NA	2	1	1	1	1	0	0	0	0	0	0	0	0	0	1	1	1	1
NM_003596	8460	TPST1 || tyrosylprotein sulfotransferase 1 (1)	1.807	1.05729	0.58511	2.09198	0	0	1	1	0	0	0	0	0	0	0	0	0	NA	-16.74	1	1	0	0	0	0	0	0	0	1	0	0	0	0	0	0	0	0
NM_017971	55052	MRPL20 || mitochondrial ribosomal protein L20 (2)	1.80633	1.0985	0.608139	2.14885	0	0	0	0	0	0	0	0	0	0	0	0	0	NA	NA	2	0	0	0	0	0	0	0	0	0	0	0	0	0	0	0	0	0
NM_148957	55504	TNFRSF19 || tumor necrosis factor receptor superfamily, member 19 (1)	1.80577	1.64046	0.908453	3.64407	0	0	1	1	0	0	0	0	0	0	0	0	0	NA	-21.57	1	1	1	0	0	2	0	0	0	1	0	0	0	0	0	0	1	0
NM_001421	2000	ELF4 || E74-like factor 4 (ets domain transcription factor) (1)	1.80299	1.14767	0.636534	2.22188	0	0	1	3	1	0	0	0	0	0	1	0	1	-0.3228	-18.05	1	0	0	0	0	0	0	0	0	1	0	0	1	0	0	0	0	0
NM_032431	84447	SYVN1 || synovial apoptosis inhibitor 1, synoviolin (1)	1.80181	1.285	0.71317	2.34812	0	0	0	0	0	0	0	0	0	0	0	0	0	NA	-16.68	1	0	0	0	0	0	0	0	0	0	0	0	0	0	0	0	0	0
NM_032314	84274	MGC4767 || hypothetical protein MGC4767 (2)	1.8001	1.03823	0.576763	2.03494	0	0	2	1	1	0	0	0	0	0	0	0	1	-0.1544	-20.2	1	0	0	0	0	NA	NA	NA	0	2	0	0	1	0	0	0	0	0
NM_001007538	387914	TMEM46 || transmembrane protein 46 (1)	1.79809	1.04479	0.581056	2.05631	0	0	2	1	0	0	0	0	0	0	0	0	0	NA	-22.93	0	0	0	0	0	0	0	0	0	2	0	0	0	0	0	0	0	0
NM_006868	11031	RAB31 || RAB31, member RAS oncogene family (3)	1.79764	1.52642	0.849123	2.73971	0	0	2	0	0	1	0	0	0	0	0	0	1	-0.1553	-24.34	2	2	2	0	0	0	0	0	1	2	1	0	0	0	0	0	2	1
NM_175902	79701	FLJ22222 || hypothetical protein FLJ22222 (3)	1.79495	1.53729	0.856455	2.81182	0	0	1	1	1	1	1	1	0	0	0	0	0	NA	-20.8	0	0	0	0	0	0	1	0	1	1	1	1	1	1	0	0	0	0
NM_018290	55276	PGM2 || phosphoglucomutase 2 (1)	1.79473	1.68583	0.939323	3.07071	0	0	1	1	1	1	1	0	0	0	0	0	1	-0.4989	-18.79	1	0	0	1	0	NA	NA	NA	1	1	1	0	1	0	1	0	0	0
NM_006698	10904	BLCAP || bladder cancer associated protein (1)	1.79265	1.07917	0.601996	2.14814	0	0	1	0	0	0	0	0	0	0	0	0	0	NA	-18.05	1	1	1	0	0	1	0	0	0	1	0	0	0	0	0	0	1	0
NM_002835	5782	PTPN12 || protein tyrosine phosphatase, non-receptor type 12 (1)	1.79185	1.43528	0.801006	3.04222	0	0	3	1	1	2	0	1	1	1	1	1	0	-0.6047	-20.61	1	0	0	0	0	NA	NA	NA	2	3	2	2	1	1	0	0	0	0
NM_001012333	4192	MDK || midkine (neurite growth-promoting factor 2) (1)	1.78934	1.44979	0.810239	2.58066	0	0	2	1	1	0	0	1	0	0	0	1	0	-0.155	-19.43	0	0	0	0	0	0	0	0	0	2	0	0	1	1	0	0	0	0
NM_001156	310	ANXA7 || annexin A7 (27)	1.78882	1.40401	0.784881	2.5028	0	0	2	0	0	1	0	1	1	0	0	1	0	-0.1681	-20.51	2	1	0	0	0	NA	NA	NA	1	2	1	1	0	0	0	0	0	0
NM_000152	2548	GAA || glucosidase, alpha; acid (Pompe disease, glycogen storage disease type II) (1)	1.78743	1.46704	0.820754	2.52814	0	0	0	0	0	0	0	0	0	0	0	0	0	NA	NA	1	3	0	0	0	0	0	0	0	0	0	0	0	0	0	0	0	0
NM_173797	167153	PAPD4 || PAP associated domain containing 4 (1)	1.78652	1.14083	0.638579	2.29288	0	0	1	0	0	1	0	0	0	1	0	0	1	-0.1109	NA	1	1	1	0	0	0	0	0	1	1	1	0	0	0	0	0	1	1
NM_022496	64431	ACTR6 || ARP6 actin-related protein 6 homolog (yeast) (2)	1.78603	1.30012	0.727941	2.53067	0	0	0	0	0	0	0	0	0	0	0	0	0	NA	NA	0	0	0	0	0	0	0	0	0	0	0	0	0	0	0	0	0	0
NM_012120	23607	CD2AP || CD2-associated protein (1)	1.78469	1.26083	0.706472	2.33992	0	0	0	2	0	0	0	0	0	0	0	0	0	NA	NA	0	0	0	0	0	0	0	0	1	0	0	0	0	0	0	0	0	0
NM_024989	80055	PGAP1 || GPI deacylase (2)	1.78191	1.32321	0.742578	2.4207	0	0	5	4	1	1	0	0	0	0	0	1	1	-0.1691	-29.46	2	3	1	1	1	0	0	0	1	5	1	0	1	1	1	1	1	1
NM_015158	23189	ANKRD15 || ankyrin repeat domain 15 (2)	1.78088	1.21042	0.679675	2.4349	0	0	1	2	1	1	1	1	1	1	1	1	0	-0.4859	-21.13	1	2	0	0	0	1	0	0	1	1	1	1	1	1	0	0	0	0
NM_003070	6595	SMARCA2 || SWI/SNF related, matrix associated, actin dependent regulator of chromatin, subfamily a, member 2 (1)	1.77515	1.38163	0.778313	2.89994	0	0	0	1	0	0	0	0	0	0	0	0	0	NA	-19.65	0	0	0	0	0	0	0	0	0	0	0	0	0	0	0	0	0	0
NM_005437	8031	NCOA4 || nuclear receptor coactivator 4 (1)	1.76719	1.35112	0.76456	2.40272	0	0	1	1	1	0	0	1	0	0	0	1	0	-0.1844	-16.36	0	3	0	0	0	0	0	0	0	1	NA	NA	NA	NA	NA	NA	NA	NA
NM_006517	6567	SLC16A2 || solute carrier family 16 (monocarboxylic acid transporters), member 2 (1)	1.76606	1.4085	0.797537	2.74137	0	0	1	0	0	0	0	0	0	0	0	0	0	NA	-16.14	0	0	0	0	0	0	0	0	0	1	0	0	0	0	0	0	0	0
NM_019556	56180	MOSPD1 || motile sperm domain containing 1 (1)	1.76495	1.10496	0.626058	2.13719	0	0	1	0	0	0	0	0	0	0	0	0	0	NA	-19.4	1	1	0	1	0	0	0	0	0	1	0	0	0	0	1	1	0	0
NM_006496	2773	GNAI3 || guanine nucleotide binding protein (G protein), alpha inhibiting activity polypeptide 3 (2)	1.76313	1.51871	0.86137	3.18271	0	0	3	3	2	0	0	1	0	0	1	1	0	-0.4141	-17.87	0	0	0	0	0	NA	NA	NA	0	3	0	0	2	2	0	0	0	0
NA	441243	na || similar to RIKEN cDNA 2610034N24 (1)	1.76244	1.08146	0.613614	2.18082	0	0	NA	NA	NA	NA	NA	0	0	0	0	0	0	NA	NA	NA	NA	NA	NA	NA	NA	NA	NA	NA	NA	NA	NA	NA	NA	NA	NA	NA	NA
NM_032367	84327	ZBED3 || zinc finger, BED domain containing 3 (1)	1.75855	1.57537	0.895837	2.87536	0	0	1	2	0	0	0	0	0	0	1	0	0	NA	-16.34	0	0	0	0	0	0	0	0	0	1	0	0	0	0	0	0	0	0
NM_000391	1200	TPP1 || tripeptidyl peptidase I (2)	1.75743	1.11125	0.632315	2.27148	0	0	3	2	0	1	0	0	0	0	0	0	1	-0.072	-22.12	0	1	0	0	0	0	0	0	1	3	1	0	0	0	0	0	0	0
NA	401606	na || similar to MYST histone acetyltransferase 2; histone acetyltransferase (1)	1.75677	1.14496	0.651739	2.19795	0	0	NA	NA	NA	NA	NA	0	0	0	0	0	0	NA	NA	NA	NA	NA	NA	NA	NA	NA	NA	NA	NA	NA	NA	NA	NA	NA	NA	NA	NA
NM_017832	54942	FLJ20457 || hypothetical protein FLJ20457 (1)	1.75659	1.25183	0.712651	2.27558	0	0	0	1	0	0	0	0	0	0	0	0	0	NA	NA	1	1	1	0	0	0	0	0	0	0	0	0	0	0	0	0	1	0
NM_024815	79873	FLJ22494 || hypothetical protein FLJ22494 (1)	1.75552	1.38054	0.786402	2.57552	0	0	1	1	1	0	0	0	0	0	0	0	1	-0.1995	-17.11	0	0	0	0	0	0	0	0	0	1	0	0	1	0	0	0	0	0
NM_006681	10874	NMU || neuromedin U (1)	1.75532	1.22771	0.699422	2.54747	0	0	0	0	0	0	0	0	0	0	0	0	0	NA	NA	0	0	0	0	0	0	0	0	0	0	0	0	0	0	0	0	0	0
NM_021826	60493	FLJ13149 || hypothetical protein FLJ13149 (1)	1.75297	1.36079	0.776279	2.72555	0	0	0	0	0	0	0	0	0	0	0	0	0	NA	NA	1	0	0	0	0	0	0	0	0	0	0	0	0	0	0	0	0	0
NM_145018	220042	FLJ25416 || hypothetical protein FLJ25416 (2)	1.75202	1.24421	0.710155	2.40833	0	0	2	1	1	0	0	0	0	0	0	0	1	-0.267	-20.86	3	0	0	0	0	1	0	0	0	2	0	0	1	0	0	0	0	0
NM_024097	79078	C1orf50 || chromosome 1 open reading frame 50 (2)	1.74276	0.951354	0.545888	1.93314	0	0.127687	1	0	0	0	0	0	0	0	0	0	0	NA	-17.95	0	1	0	0	0	NA	NA	NA	0	1	0	0	0	0	0	0	0	0
NM_020962	57722	NOPE || likely ortholog of mouse neighbor of Punc E11 (1)	1.74109	1.34779	0.774107	2.61104	0	0.158181	3	2	0	1	0	1	0	0	0	1	0	-0.1058	-20.21	0	1	0	0	0	0	0	0	1	3	1	1	0	0	0	0	0	0
NM_001860	1318	SLC31A2 || solute carrier family 31 (copper transporters), member 2 (1)	1.73943	1.06767	0.613803	2.12611	0	0.188682	2	1	1	1	1	1	0	0	0	1	0	-0.3408	-17.64	0	0	0	0	0	0	0	0	1	2	1	1	1	0	0	0	0	0
NM_001755	865	CBFB || core-binding factor, beta subunit (2)	1.73795	1.24158	0.714397	2.28593	0	0.216064	2	0	0	2	0	1	1	1	0	1	1	-0.053	-18.67	0	0	0	0	0	0	0	0	2	2	2	1	0	0	0	0	0	0
NM_000381	4281	MID1 || midline 1 (Opitz/BBB syndrome) (1)	1.737	1.24121	0.714571	2.43031	0	0.233669	2	0	0	1	0	0	0	0	0	0	0	NA	-22.69	2	2	1	1	0	0	0	0	1	2	1	0	0	0	1	0	1	1
NM_173490	134285	PRP2 || proline-rich protein PRP2 (1)	1.73567	1.16491	0.671161	2.23673	0	0.258457	0	0	0	0	0	0	0	0	0	0	0	NA	NA	1	1	1	1	1	0	0	0	0	0	0	0	0	0	1	0	1	0
NM_006875	11040	PIM2 || pim-2 oncogene (1)	1.73076	1.14771	0.663123	2.22876	0	0.35106	0	0	0	0	0	0	0	0	0	0	0	NA	-21.72	0	1	0	0	0	0	0	0	0	0	0	0	0	0	0	0	0	0
NM_003463	7803	PTP4A1 || protein tyrosine phosphatase type IVA, member 1 (1)	1.73004	1.11312	0.643411	2.22297	0	0.364894	3	2	0	0	0	0	0	0	0	0	0	NA	-20.45	0	0	0	0	0	0	0	0	2	3	0	0	0	0	0	0	0	0
NM_020123	56889	SMBP || SM-11044 binding protein (1)	1.72947	1.29792	0.750472	2.7463	0	0.375782	0	0	0	0	0	0	0	0	0	0	0	NA	NA	2	2	1	0	0	0	0	0	0	0	0	0	0	0	0	0	1	1
NM_024544	79594	FLJ12875 || hypothetical protein FLJ12875 (1)	1.72823	1.05372	0.609709	2.08507	0	0.399514	2	0	0	0	0	0	0	0	0	0	0	NA	NA	1	1	1	1	1	0	0	0	0	2	0	0	0	0	1	1	1	1
NM_003848	8801	SUCLG2 || succinate-CoA ligase, GDP-forming, beta subunit (1)	1.72626	1.10653	0.640999	2.28362	0	0.437612	1	0	0	1	0	1	0	0	0	1	0	-0.1406	-18.28	0	0	0	0	0	NA	NA	0	2	1	1	1	0	0	0	0	0	0
NA	81137	OR7E104P || olfactory receptor, family 7, subfamily E, member 104 pseudogene (1)	1.72155	1.67633	0.973732	4.24534	0	0.52977	NA	NA	NA	NA	NA	0	0	0	0	0	0	NA	NA	NA	NA	NA	NA	NA	NA	NA	NA	NA	NA	NA	NA	NA	NA	NA	NA	NA	NA
NM_014365	26353	HSPB8 || heat shock 22kDa protein 8 (1)	1.72072	1.66367	0.966842	4.28035	0	0.546244	1	1	1	0	0	0	0	0	0	0	1	-0.171	-19.53	0	1	0	0	0	0	0	0	0	1	0	0	1	0	0	0	0	0
NA	192137	C2orf12 || chromosome 2 open reading frame 12 (2)	1.72038	1.9765	1.14887	4.1633	0	0.553033	NA	NA	NA	NA	NA	0	0	0	0	0	0	NA	NA	NA	NA	NA	NA	NA	NA	NA	NA	NA	NA	NA	NA	NA	NA	NA	NA	NA	NA
NM_145858	9946	CRYZL1 || crystallin, zeta (quinone reductase)-like 1 (2)	1.72015	1.26152	0.73338	2.37629	0	0.557665	0	0	0	0	0	0	0	0	0	0	0	NA	NA	2	2	1	0	0	0	0	0	0	0	0	0	0	0	0	0	1	0
NM_001017396	7549	ZNF2 || zinc finger protein 2 (1)	1.71877	1.22746	0.714147	2.5074	0	0.584999	3	1	1	1	0	1	0	0	0	0	1	-0.2662	-23.7	1	0	0	0	0	0	0	0	1	3	1	0	1	0	0	0	0	0
NM_138493	154467	C6orf129 || chromosome 6 open reading frame 129 (3)	1.71814	1.38994	0.808978	2.4015	0	0.597696	0	0	0	0	0	0	0	0	0	0	0	NA	NA	0	0	0	0	0	0	0	0	0	0	0	0	0	0	0	0	0	0
NM_003432	7690	ZNF131 || zinc finger protein 131 (clone pHZ-10) (2)	1.71811	1.10196	0.641381	2.19396	0	0.598304	0	0	0	0	0	0	0	0	0	0	0	NA	NA	1	0	0	0	0	NA	NA	NA	0	0	0	0	0	0	0	0	0	0
NM_015426	25886	WDR51A || WD repeat domain 51A (2)	1.71528	1.05004	0.61217	2.03124	0	0.655341	1	0	0	0	0	0	0	0	0	0	0	NA	-17.06	1	0	0	0	0	NA	NA	NA	0	1	0	0	0	0	0	0	0	0
NM_145284	159090	LOC159090 || similar to hypothetical protein MGC17347 (1)	1.71392	1.50933	0.880633	3.65462	0	0.682946	6	2	1	2	0	1	0	0	0	1	1	-0.2393	-17.53	0	0	0	0	0	0	1	0	3	6	2	0	1	1	0	0	0	0
NM_001395	1852	DUSP9 || dual specificity phosphatase 9 (1)	1.71102	1.68538	0.985011	2.9229	0	0.742221	0	1	0	0	0	0	0	0	0	0	0	NA	NA	0	2	0	0	0	0	0	0	0	0	0	0	0	0	0	0	0	0
NM_006810	10954	PDIA5 || protein disulfide isomerase-associated 5 (2)	1.70974	1.20646	0.705637	2.45376	0	0.768596	0	0	0	0	0	0	0	0	0	0	0	NA	NA	1	1	0	0	0	NA	NA	NA	0	0	0	0	0	0	0	0	0	0
NM_004393	1605	DAG1 || dystroglycan 1 (dystrophin-associated glycoprotein 1) (1)	1.70838	1.20829	0.707273	2.37616	0	0.796846	4	0	0	0	0	0	0	0	0	0	0	NA	-18.36	3	3	0	0	0	0	0	0	0	4	0	0	0	0	0	0	0	0
NM_006001	7278	TUBA2 || tubulin, alpha 2 (2)	1.70628	1.13054	0.662576	2.15555	0	0.840659	0	0	0	0	0	0	0	0	0	0	0	NA	NA	1	1	1	0	0	NA	NA	NA	0	0	0	0	0	0	0	0	1	0
NM_021227	58505	DC2 || DC2 protein (2)	1.70583	1.25663	0.736665	2.33085	0	0.850168	2	1	1	0	0	0	0	0	0	0	1	NA	-17.25	0	0	0	0	0	0	0	0	0	2	0	0	1	0	0	0	0	0
NA	113655	LOC113655 || hypothetical protein BC011982 (2)	1.70402	1.54254	0.905236	2.98277	0	0.888242	NA	NA	NA	NA	NA	0	0	0	0	0	0	NA	NA	NA	NA	NA	NA	NA	NA	NA	NA	NA	NA	NA	NA	NA	NA	NA	NA	NA	NA
NM_006275	6431	SFRS6 || splicing factor, arginine/serine-rich 6 (1)	1.70283	1.08516	0.637268	2.12633	0	0.913528	2	1	1	1	0	1	0	0	0	1	0	-0.3716	-21.5	0	0	0	0	0	0	0	0	1	2	1	1	1	1	0	0	0	0
NM_022743	64754	SMYD3 || SET and MYND domain containing 3 (1)	1.70281	1.11262	0.653406	2.16551	0	0.913958	1	0	0	1	0	0	0	0	0	0	1	-0.1139	-21.53	2	0	0	1	0	1	0	0	1	1	1	0	0	0	1	0	0	0
NM_001033521	1477	CSTF1 || cleavage stimulation factor, 3' pre-RNA, subunit 1, 50kDa (2)	1.7022	1.08833	0.63937	2.06962	0	0.926957	0	0	0	0	0	0	0	0	0	0	0	NA	-16.1	1	1	1	0	0	0	0	0	0	0	0	0	0	0	0	0	1	0
NM_015901	25961	NUDT13 || nudix (nucleoside diphosphate linked moiety X)-type motif 13 (1)	1.70005	1.02038	0.600202	2.10342	0	0.972798	0	1	0	0	0	0	0	0	0	0	0	NA	NA	1	1	0	0	0	0	0	0	0	0	0	0	0	0	0	0	0	0
NM_001360	1717	DHCR7 || 7-dehydrocholesterol reductase (1)	1.69833	1.19433	0.703239	2.23034	0	1.00996	2	0	0	0	0	0	0	0	0	0	0	NA	-16.68	2	2	1	2	1	0	0	0	0	2	0	0	0	0	2	0	1	0
NM_001688	515	ATP5F1 || ATP synthase, H+ transporting, mitochondrial F0 complex, subunit b, isoform 1 (3)	1.69653	1.17808	0.694409	2.24793	0	1.04892	2	0	0	0	0	0	0	0	0	0	0	NA	-18.74	0	0	0	0	0	0	0	0	0	2	0	0	0	0	0	0	0	0
NM_182505	138241	C9orf85 || chromosome 9 open reading frame 85 (3)	1.695	1.46421	0.863842	2.6971	0	1.08231	1	1	1	0	0	0	0	0	0	0	1	-0.3072	-22.62	0	1	0	0	0	0	0	0	0	1	0	0	1	0	0	0	0	0
NM_001839	1266	CNN3 || calponin 3, acidic (1)	1.69384	1.18562	0.699964	2.22602	0	1.10767	2	0	0	1	0	1	1	0	0	1	0	-0.1608	-22.52	0	0	0	0	0	0	0	0	1	2	1	1	0	0	0	0	0	0
NM_006289	7094	TLN1 || talin 1 (11)	1.69165	1.58208	0.93523	3.33304	0	1.15586	1	3	1	0	0	1	0	0	1	1	0	-0.1315	-19.67	3	1	1	0	0	0	0	0	0	1	0	0	1	1	0	0	1	1
NM_004473	2304	FOXE1 || forkhead box E1 (thyroid transcription factor 2) (1)	1.69117	1.01353	0.599305	1.98333	0	1.16652	1	1	1	0	0	0	0	0	0	0	1	-0.2089	-20.2	0	0	0	0	0	0	0	0	0	1	0	0	1	0	0	0	0	0
NM_017658	54813	BTBD5 || BTB (POZ) domain containing 5 (1)	1.69001	1.35975	0.804582	2.47916	0.135597	1.19234	4	0	0	2	0	0	0	0	0	1	0	-0.2864	-20.83	1	0	0	1	0	0	0	0	2	4	2	2	0	0	1	0	0	0
NM_020247	56997	CABC1 || chaperone, ABC1 activity of bc1 complex like (S. pombe) (1)	1.68955	1.06729	0.631704	2.17841	0.135597	1.20263	0	0	0	0	0	0	0	0	0	0	0	NA	NA	1	3	0	0	0	0	0	0	0	0	0	0	0	0	0	0	0	0
NM_003051	6566	SLC16A1 || solute carrier family 16 (monocarboxylic acid transporters), member 1 (1)	1.68415	1.35761	0.806112	2.4444	0.135597	1.32428	1	2	1	1	1	1	1	0	1	1	0	-0.505	-19.22	3	0	0	0	0	0	0	0	3	1	1	1	1	1	0	0	0	0
NM_004059	883	CCBL1 || cysteine conjugate-beta lyase; cytoplasmic (glutamine transaminase K, kyneurenine aminotransferase) (1)	1.68344	1.13301	0.673033	2.1379	0.135597	1.34049	1	1	0	0	0	0	0	0	0	0	0	NA	-16.15	0	0	0	0	0	0	0	0	0	1	0	0	0	0	0	0	0	0
NM_018375	55334	SLC39A9 || solute carrier family 39 (zinc transporter), member 9 (1)	1.68293	0.896458	0.532678	1.87903	0.135597	1.35215	0	1	0	0	0	0	0	1	0	0	0	NA	-17.89	0	1	0	0	0	0	0	0	0	0	0	0	0	0	0	0	0	0
NM_006996	10560	SLC19A2 || solute carrier family 19 (thiamine transporter), member 2 (2)	1.68188	1.13217	0.673155	2.17839	0.135597	1.37605	2	0	0	1	0	0	0	0	0	0	1	-0.082	-18.41	1	0	0	0	0	0	1	0	1	2	1	0	0	0	0	0	0	0
NM_017907	55004	FLJ20625 || hypothetical protein FLJ20625 (1)	1.68148	1.36056	0.809145	2.55662	0.135597	1.38529	0	0	0	0	0	0	0	0	0	0	0	NA	NA	1	0	0	0	0	0	0	0	0	0	0	0	0	0	0	0	0	0
NM_053055	117145	CTMP || C-terminal modulator protein (1)	1.6788	1.16833	0.695933	2.4242	0.135597	1.44713	0	0	0	0	0	0	0	0	0	0	0	NA	-16.61	1	1	0	0	0	0	0	0	0	0	0	0	0	0	0	0	0	0
NM_007038	11096	ADAMTS5 || a disintegrin-like and metalloprotease (reprolysin type) with thrombospondin type 1 motif, 5 (aggrecanase-2) (1)	1.67766	1.05917	0.631337	2.12422	0.135597	1.47373	2	2	0	0	0	0	0	0	0	0	0	NA	-22.29	0	0	0	0	0	0	0	0	0	2	0	0	0	0	0	0	0	0
NM_020376	57104	PNPLA2 || patatin-like phospholipase domain containing 2 (1)	1.67591	1.25079	0.746334	2.60041	0.135597	1.51445	1	1	1	1	1	1	0	0	0	1	0	-0.2735	-16.98	0	0	0	0	0	0	0	0	1	1	1	0	1	1	0	0	0	0
NM_001759	894	CCND2 || cyclin D2 (1)	1.67327	1.19717	0.715467	2.36752	0.135597	1.57681	5	3	1	2	1	1	0	0	0	1	1	-0.2757	-21.24	0	0	0	0	0	0	0	0	3	5	2	1	1	1	0	0	0	0
NM_153347	144110	FLJ90119 || hypothetical protein FLJ90119 (1)	1.67179	1.16542	0.697108	2.1916	0.135597	1.61186	1	0	0	0	0	0	0	0	0	0	0	NA	-16.54	1	2	1	0	0	0	0	0	0	1	0	0	0	0	0	0	1	0
NA	5050	PAFAH1B3 || platelet-activating factor acetylhydrolase, isoform Ib, gamma subunit 29kDa (1)	1.67147	1.28991	0.771723	2.66826	0.135597	1.61943	NA	NA	NA	NA	NA	0	0	0	0	0	0	NA	NA	NA	NA	NA	NA	NA	NA	NA	NA	NA	NA	NA	NA	NA	NA	NA	NA	NA	NA
NM_012279	23567	ZNF346 || zinc finger protein 346 (5)	1.67016	1.163	0.696342	2.20366	0.135597	1.6508	2	1	0	0	0	0	0	0	0	0	0	NA	-17.17	0	0	0	0	0	NA	NA	NA	2	2	0	0	0	0	0	0	0	0
NM_207337	196394	LOC196394 || hypothetical protein LOC196394 (1)	1.66924	1.04438	0.625658	2.10402	0.135597	1.6727	0	0	0	0	0	0	0	0	0	0	0	NA	-22.27	0	0	0	0	0	1	0	0	0	0	0	0	0	0	0	0	0	0
NM_001018111	5420	PODXL || podocalyxin-like (1)	1.66765	1.55544	0.932711	3.05757	0.135597	1.71099	2	4	1	0	0	0	0	0	1	0	1	-0.1472	-16.77	0	0	0	0	0	0	0	0	1	2	0	0	1	0	0	0	0	0
NM_007073	11149	BVES || blood vessel epicardial substance (1)	1.66631	1.10292	0.66189	2.2393	0.135597	1.74336	3	0	0	0	0	0	0	0	0	0	0	NA	-22.93	4	4	3	0	0	0	0	0	1	3	0	0	0	0	0	0	3	0
NA	128322	na || similar to Nuclear transport factor 2 (NTF-2) (1)	1.66626	1.15642	0.69402	2.16356	0.135597	1.74471	NA	NA	NA	NA	NA	0	0	0	0	0	0	NA	NA	NA	NA	NA	NA	NA	NA	NA	NA	NA	NA	NA	NA	NA	NA	NA	NA	NA	NA
NM_144580	112770	C1orf85 || chromosome 1 open reading frame 85 (3)	1.66512	1.20381	0.722955	2.37396	0.135597	1.7723	1	1	0	0	0	0	0	0	0	0	0	NA	-16.33	2	1	1	1	0	NA	NA	NA	0	1	0	0	0	0	1	0	1	1
NM_001001974	59338	PLEKHA1 || pleckstrin homology domain containing, family A (phosphoinositide binding specific) member 1 (3)	1.66502	1.3055	0.784075	2.65128	0.135597	1.77482	0	2	0	0	0	0	0	0	0	0	0	NA	-17.57	1	0	0	1	0	0	0	0	0	0	0	0	0	0	1	0	0	0
NM_006959	7565	ZNF17 || zinc finger protein 17 (HPF3, KOX 10) (2)	1.66451	1.15583	0.694398	2.1813	0.135597	1.78719	0	0	0	0	0	0	0	0	0	0	0	NA	NA	0	0	0	0	0	0	1	0	0	0	0	0	0	0	0	0	0	0
NM_001304	1362	CPD || carboxypeptidase D (1)	1.66239	1.1585	0.696888	2.23592	0.135597	1.8392	3	2	2	0	0	1	0	1	0	1	0	-0.4307	-19.65	1	1	0	1	0	NA	NA	NA	0	3	0	0	2	2	1	0	0	0
NM_000849	2947	GSTM3 || glutathione S-transferase M3 (brain) (1)	1.658	1.35567	0.817651	3.03211	0.135597	1.94794	0	2	0	0	0	0	0	0	0	0	0	NA	NA	0	1	0	0	0	0	0	0	1	0	0	0	0	0	0	0	0	0
NM_003104	6652	SORD || sorbitol dehydrogenase (3)	1.6563	1.10067	0.664532	2.2934	0.135597	1.99045	2	2	2	1	1	1	0	0	0	1	1	-0.568	-20.26	0	0	0	0	0	0	0	0	1	2	1	1	2	0	0	0	0	0
NA	441181	na || LOC441181 (1)	1.65322	1.08975	0.659169	2.09038	0.135597	2.06838	NA	NA	NA	NA	NA	0	0	0	0	0	0	NA	NA	NA	NA	NA	NA	NA	NA	NA	NA	NA	NA	NA	NA	NA	NA	NA	NA	NA	NA
NM_017875	54977	FLJ20551 || hypothetical protein FLJ20551 (2)	1.6529	0.938021	0.567499	1.92074	0.135597	2.07635	2	0	0	0	0	0	0	0	0	0	0	NA	-18.67	0	1	0	0	0	0	0	0	0	2	1	0	1	0	0	0	0	0
NM_018472	55855	FAM45B || family with sequence similarity 45, member B (1)	1.65237	1.15771	0.700633	2.22497	0.135597	2.08982	0	0	0	0	0	0	0	0	0	0	0	NA	NA	2	0	0	1	0	0	0	0	0	0	0	0	0	0	1	0	0	0
NM_012238	23411	SIRT1 || sirtuin (silent mating type information regulation 2 homolog) 1 (S. cerevisiae) (1)	1.6519	1.10079	0.666378	2.3363	0.135597	2.10182	1	1	0	1	0	1	1	1	0	1	0	-0.1016	-18.03	0	1	0	0	0	0	0	0	1	1	1	1	0	0	0	0	0	0
NM_031465	83695	MGC13204 || hypothetical protein MGC13204 (2)	1.6506	0.935917	0.567016	1.90733	0.135597	2.13517	0	0	0	0	0	0	0	0	0	0	0	NA	NA	0	0	0	0	0	0	0	0	0	0	0	0	0	0	0	0	0	0
NM_006415	10558	SPTLC1 || serine palmitoyltransferase, long chain base subunit 1 (11)	1.6494	1.32325	0.802263	2.4422	0.135597	2.16602	1	1	1	0	0	1	0	0	0	1	0	-0.2679	-19.72	0	0	0	0	0	NA	NA	NA	0	1	0	0	1	1	0	0	0	0
NM_001338	1525	CXADR || coxsackie virus and adenovirus receptor (1)	1.64928	1.29383	0.784482	2.31896	0.135597	2.16893	1	0	0	0	0	0	0	0	0	0	0	NA	-17.59	0	1	0	0	0	0	0	0	0	1	0	0	0	0	0	0	0	0
NM_032264	84224	AE2 || hypothetical protein AE2 (2)	1.64558	1.0232	0.621791	2.03963	0.135597	2.26494	1	1	1	0	0	0	0	0	0	0	1	-0.2734	NA	1	1	1	0	0	0	0	0	1	1	0	0	1	0	0	0	1	0
NM_005981	6302	SAS || sarcoma amplified sequence (2)	1.6447	1.08156	0.657605	2.15716	0.135597	2.28783	1	0	0	0	0	0	0	0	0	0	0	NA	-16.79	1	1	1	0	0	0	0	0	0	1	0	0	0	0	0	0	1	1
NM_000917	5033	P4HA1 || procollagen-proline, 2-oxoglutarate 4-dioxygenase (proline 4-hydroxylase), alpha polypeptide I (3)	1.64427	1.05262	0.64018	2.01785	0.135597	2.29918	2	2	1	2	1	1	1	0	0	1	1	-0.4962	-17.21	0	1	0	0	0	0	0	0	2	2	2	1	1	1	0	0	0	0
NA	26628	OR7E47P || olfactory receptor, family 7, subfamily E, member 47 pseudogene (1)	1.64101	1.49998	0.914057	3.40644	0.135597	2.3848	NA	NA	NA	NA	NA	0	0	0	0	0	0	NA	NA	NA	NA	NA	NA	NA	NA	NA	NA	NA	NA	NA	NA	NA	NA	NA	NA	NA	NA
NM_014283	51430	C1orf9 || chromosome 1 open reading frame 9 (1)	1.64076	1.21958	0.743306	2.33324	0.135597	2.39161	1	2	1	0	0	1	0	0	0	1	0	-0.282	-21.07	0	0	0	0	0	0	0	0	0	1	0	0	1	1	0	0	0	0
NM_000165	2697	GJA1 || gap junction protein, alpha 1, 43kDa (connexin 43) (2)	1.63782	1.25863	0.768477	2.46076	0.135597	2.4698	1	1	0	0	0	0	0	0	0	0	0	NA	-18.49	1	0	0	0	0	1	1	0	1	1	0	0	0	0	0	0	0	0
NA	29092	HSPC157 || HSPC157 protein (2)	1.63714	1.30204	0.795316	2.3571	0.135597	2.488	NA	NA	NA	NA	NA	0	0	0	0	0	0	NA	NA	NA	NA	NA	NA	NA	NA	NA	NA	NA	NA	NA	NA	NA	NA	NA	NA	NA	NA
NM_018373	55333	SYNJ2BP || synaptojanin 2 binding protein (2)	1.63631	1.05125	0.64245	2.0836	0.135597	2.51016	0	1	0	0	0	0	0	0	0	0	0	NA	-19.51	0	0	0	0	0	0	0	0	1	0	0	0	1	0	0	0	0	0
NM_004635	7867	MAPKAPK3 || mitogen-activated protein kinase-activated protein kinase 3 (1)	1.63516	1.22583	0.749673	2.36096	0.135597	2.54132	2	2	0	0	0	0	0	0	0	0	0	NA	-16.43	1	1	1	0	0	0	0	0	2	2	0	0	0	0	0	0	1	0
NA	326343	MTM || metallothionein M (2)	1.63303	1.12689	0.690061	2.19266	0.135597	2.59891	NA	NA	NA	NA	NA	0	0	0	0	0	0	NA	NA	NA	NA	NA	NA	NA	NA	NA	NA	NA	NA	NA	NA	NA	NA	NA	NA	NA	NA
NM_006066	10327	AKR1A1 || aldo-keto reductase family 1, member A1 (aldehyde reductase) (1)	1.63204	1.0625	0.651027	2.02335	0.135597	2.62597	0	0	0	0	0	0	0	0	0	0	0	NA	NA	1	2	0	0	0	0	0	0	0	0	0	0	0	0	0	0	0	0
NM_003901	8879	SGPL1 || sphingosine-1-phosphate lyase 1 (1)	1.63173	0.880951	0.539889	1.84267	0.135597	2.63443	3	3	1	0	0	1	0	0	0	1	0	-0.1145	-20.87	1	0	0	0	0	0	0	0	1	3	0	0	1	1	0	0	0	0
NM_032881	84967	LSM10 || LSM10, U7 small nuclear RNA associated (1)	1.63018	1.13246	0.694682	2.12333	0.135597	2.67674	1	0	0	0	0	0	0	0	0	0	0	NA	-16.28	0	0	0	0	0	0	0	0	0	1	0	0	0	0	0	0	0	0
NM_002354	4072	TACSTD1 || tumor-associated calcium signal transducer 1 (1)	1.62868	1.25308	0.769385	2.22699	0.135597	2.71801	1	0	0	0	0	0	0	0	0	0	0	NA	-17.4	0	0	0	0	0	0	0	0	0	1	0	0	0	0	0	0	0	0
NM_015627	26119	LDLRAP1 || low density lipoprotein receptor adaptor protein 1 (2)	1.62702	1.16358	0.715163	2.24177	0.135597	2.76401	3	4	1	0	0	1	0	0	0	1	0	-0.0964	-19.93	0	1	0	0	0	0	0	0	0	3	0	0	1	1	0	0	0	0
NM_207352	285440	CYP4V2 || cytochrome P450, family 4, subfamily V, polypeptide 2 (1)	1.62577	1.46708	0.902395	3.30227	0.135597	2.79878	3	5	1	0	0	0	0	0	0	0	1	-0.2372	NA	1	1	1	1	1	0	0	0	0	3	0	0	1	0	1	0	1	0
NM_000075	1019	CDK4 || cyclin-dependent kinase 4 (3)	1.62496	1.27929	0.787278	2.53004	0.135597	2.82141	2	0	0	1	0	0	0	0	1	0	1	-0.0927	-19.98	1	1	0	0	0	0	0	0	1	2	1	0	0	0	0	0	0	0
NM_006020	8846	ALKBH || alkB, alkylation repair homolog (E. coli) (2)	1.62457	1.31638	0.810292	3.02367	0.135597	2.83224	1	0	0	0	0	0	0	0	0	0	0	NA	-17.56	1	1	1	1	1	NA	NA	NA	0	1	0	0	0	0	1	1	1	1
NM_173824	285237	MGC26717 || hypothetical protein MGC26717 (1)	1.62448	1.25483	0.772449	2.61423	0.135597	2.83469	0	0	0	0	0	0	0	0	0	0	0	NA	NA	0	0	0	0	0	0	0	0	0	0	0	0	0	0	0	0	0	0
NM_003858	8812	CCNK || cyclin K (1)	1.62381	1.12458	0.692558	2.20839	0.135597	2.8534	0	1	0	0	0	0	0	0	0	0	0	NA	NA	0	0	0	0	0	0	0	0	0	0	0	0	0	0	0	0	0	0
NM_022450	64285	RHBDF1 || rhomboid family 1 (Drosophila) (2)	1.6216	1.09129	0.672973	2.07779	0.135597	2.91568	1	1	1	0	0	0	0	0	0	0	1	-0.2381	-19.31	3	3	2	0	0	1	0	0	0	1	0	0	1	0	0	0	2	1
NM_004816	9413	C9orf61 || chromosome 9 open reading frame 61 (1)	1.62102	1.23933	0.764541	2.72745	0.135597	2.93211	1	0	0	0	0	0	0	0	0	0	0	NA	-17.36	2	2	1	0	0	0	0	0	0	1	0	0	0	0	0	0	1	1
NM_153183	170685	NUDT10 || nudix (nucleoside diphosphate linked moiety X)-type motif 10 (1)	1.62085	1.1151	0.687976	2.11754	0.135597	2.93691	0	1	0	0	0	0	0	0	0	0	0	NA	NA	0	1	0	0	0	1	0	0	0	0	0	0	0	0	0	0	0	0
NM_002300	3945	LDHB || lactate dehydrogenase B (1)	1.62024	1.32617	0.818502	2.3302	0.135597	2.95408	0	0	0	0	0	0	0	0	0	0	0	NA	NA	0	1	0	0	0	0	0	0	0	0	0	0	0	0	0	0	0	0
NM_152444	145482	ZADH1 || zinc binding alcohol dehydrogenase, domain containing 1 (1)	1.61919	1.65302	1.02089	3.75152	0.135597	2.98379	0	0	0	0	0	0	0	0	0	0	0	NA	NA	1	2	1	1	1	0	0	0	0	0	0	0	0	0	1	0	1	0
NM_145043	252969	NEIL2 || nei like 2 (E. coli) (1)	1.61801	1.34225	0.829567	3.00415	0.135597	3.01748	0	0	0	0	0	0	0	0	0	0	0	NA	NA	0	1	0	0	0	0	0	0	0	0	0	0	0	0	0	0	0	0
NM_002923	5997	RGS2 || regulator of G-protein signalling 2, 24kDa (1)	1.61719	1.29496	0.800746	2.45193	0.135597	3.041	0	0	0	0	0	0	0	0	0	0	0	NA	NA	0	0	0	0	0	NA	NA	NA	1	0	0	0	0	0	0	0	0	0
NM_001039573	6397	SEC14L1 || SEC14-like 1 (S. cerevisiae) (1)	1.61675	1.47612	0.913017	3.28592	0.135597	3.05377	0	0	0	0	0	0	0	0	0	0	0	NA	NA	0	0	0	0	0	0	0	0	0	0	0	0	0	0	0	0	0	0
NM_004252	9368	SLC9A3R1 || solute carrier family 9 (sodium/hydrogen exchanger), isoform 3 regulator 1 (1)	1.61608	1.2585	0.778738	2.42907	0.135597	3.07296	0	1	0	0	0	0	0	0	0	0	0	NA	NA	0	0	0	0	0	0	0	0	1	0	0	0	0	0	0	0	0	0
NM_005935	4299	MLLT2 || myeloid/lymphoid or mixed-lineage leukemia (trithorax homolog, Drosophila); translocated to, 2 (3)	1.61222	1.13966	0.706891	2.37954	0.135597	3.18457	8	3	2	1	0	0	0	0	0	0	1	-0.3059	NA	5	2	1	0	0	0	0	0	3	8	1	0	2	0	0	0	1	1
NM_153261	255919	FLJ38101 || hypothetical protein FLJ38101 (2)	1.61082	1.22038	0.757613	2.58612	0.135597	3.22547	3	3	2	0	0	1	0	0	0	1	0	-0.427	-23.09	0	1	0	0	0	NA	NA	NA	0	3	0	0	2	2	0	0	0	0
NM_018072	55127	FLJ10359 || protein BAP28 (2)	1.60798	1.01767	0.632887	2.1323	0.135597	3.3089	1	1	1	1	1	0	0	0	0	0	1	-0.4045	-18.3	2	1	1	0	0	1	0	0	1	1	1	0	1	0	0	0	1	0
NM_005086	8082	SSPN || sarcospan (Kras oncogene-associated gene) (1)	1.60763	1.46246	0.909697	2.7287	0.135597	3.319	0	0	0	0	0	0	0	0	0	0	0	NA	NA	0	0	0	0	0	0	0	0	0	0	0	0	0	0	0	0	0	0
NM_007067	11143	MYST2 || MYST histone acetyltransferase 2 (2)	1.60543	1.04202	0.649062	2.16855	0.135597	3.38441	1	2	1	0	0	1	0	0	0	1	0	-0.2594	-22.76	0	1	0	0	0	0	0	0	0	1	0	0	1	1	0	0	0	0
NM_020992	9124	PDLIM1 || PDZ and LIM domain 1 (elfin) (3)	1.60541	1.01496	0.632212	1.99927	0.135597	3.38494	1	0	0	0	0	0	0	0	0	0	0	NA	-16.89	0	0	0	0	0	0	0	0	0	1	0	0	0	0	0	0	0	0
NM_006936	6612	SUMO3 || SMT3 suppressor of mif two 3 homolog 3 (yeast) (1)	1.6047	1.00103	0.623812	2.00895	0.135597	3.40594	1	0	0	0	0	0	0	0	0	0	0	NA	-19.51	0	0	0	0	0	0	0	0	0	1	0	0	0	0	0	0	0	0
NM_015251	23300	KIAA0431 || KIAA0431 protein (2)	1.60437	1.06477	0.66367	2.16907	0.135597	3.41593	5	1	1	2	0	1	0	0	0	1	1	-0.4748	-20.62	0	1	0	0	0	NA	NA	NA	3	5	2	1	1	0	0	0	0	0
NM_021914	1073	CFL2 || cofilin 2 (muscle) (3)	1.60399	0.946856	0.590312	1.96593	0.135597	3.42713	5	0	0	0	0	0	1	1	0	0	0	NA	-19.83	0	0	0	0	0	0	0	0	1	5	0	0	0	0	0	0	0	0
NM_138340	171586	ABHD3 || abhydrolase domain containing 3 (1)	1.60313	0.983708	0.613616	2.02879	0.135597	3.45289	1	0	0	1	0	1	1	1	0	1	0	-0.1024	-19.33	2	0	0	0	0	0	0	0	1	1	1	1	0	0	0	0	0	0
NM_017443	54107	POLE3 || polymerase (DNA directed), epsilon 3 (p17 subunit) (1)	1.60002	1.046	0.653744	2.10521	0.135597	3.54672	0	2	0	0	0	0	0	0	0	0	0	NA	-16.31	0	0	0	0	0	0	0	0	0	0	0	0	0	0	0	0	0	0
NM_018176	55203	LGI2 || leucine-rich repeat LGI family, member 2 (2)	1.59322	1.18853	0.745993	2.59222	0.135597	3.75458	2	0	0	0	0	0	0	0	0	0	0	NA	NA	2	1	0	0	0	NA	NA	NA	0	2	0	0	0	0	0	0	0	0
NM_004219	9232	PTTG1 || pituitary tumor-transforming 1 (2)	1.58783	1.22929	0.774198	2.6313	0.135597	3.92264	0	0	0	0	0	0	0	0	0	0	0	NA	NA	0	1	0	0	0	NA	NA	NA	0	0	0	0	0	0	0	0	0	0
NM_032508	84548	FAM11A || family with sequence similarity 11, member A (3)	1.58304	1.07846	0.68126	2.12867	0.135597	4.07429	2	0	0	0	0	0	0	0	0	0	0	NA	-18.64	1	1	0	1	0	0	0	0	0	2	0	0	0	0	NA	NA	NA	NA
NM_005273	2783	GNB2 || guanine nucleotide binding protein (G protein), beta polypeptide 2 (1)	1.58219	1.31053	0.828303	2.51521	0.135597	4.10126	0	0	0	0	0	0	0	0	0	0	0	NA	NA	1	1	0	0	0	0	0	0	0	0	0	0	0	0	0	0	0	0
NM_005891	39	ACAT2 || acetyl-Coenzyme A acetyltransferase 2 (acetoacetyl Coenzyme A thiolase) (2)	1.57549	1.37392	0.872058	2.57057	0.235603	4.31773	0	0	0	0	0	0	0	0	0	0	0	NA	NA	2	2	2	1	1	0	0	0	0	0	0	0	0	0	1	0	2	0
NM_004937	1497	CTNS || cystinosis, nephropathic (1)	1.57224	1.27983	0.814018	2.32181	0.235603	4.42415	2	2	1	1	1	1	0	0	0	1	0	-0.2766	NA	0	1	0	0	0	0	0	0	1	2	1	1	1	0	0	0	0	0
NM_002570	5046	PCSK6 || proprotein convertase subtilisin/kexin type 6 (1)	1.57175	1.1644	0.740827	2.42458	0.235603	4.44029	2	1	0	1	0	0	0	0	0	1	0	-0.1603	-21.28	1	3	0	1	0	0	0	0	1	2	1	1	0	0	1	0	0	0
NM_032799	84885	ZDHHC12 || zinc finger, DHHC domain containing 12 (1)	1.57129	1.14058	0.725888	2.342	0.235603	4.45538	2	1	0	0	0	0	0	0	0	0	0	NA	-16.15	0	0	0	0	0	NA	NA	NA	0	2	0	0	0	0	0	0	0	0
NM_016462	51522	TMEM14C || transmembrane protein 14C (3)	1.57023	0.934542	0.595161	1.92271	0.235603	4.49047	0	0	0	0	0	0	0	0	0	0	0	NA	NA	1	1	1	0	0	0	0	0	0	0	0	0	0	0	0	0	1	0
NM_004390	1512	CTSH || cathepsin H (1)	1.56999	1.01204	0.644615	2.0211	0.235603	4.49846	1	1	1	1	1	0	0	0	0	0	1	-0.3759	-17.53	1	1	0	0	0	0	0	0	1	1	1	0	1	0	0	0	0	0
NM_015554	26035	GLCE || glucuronyl C5-epimerase (1)	1.56977	0.9925	0.63226	2.03674	0.235603	4.50603	3	1	1	1	1	1	0	0	0	1	0	-0.2188	-18.85	0	0	0	0	0	0	0	0	1	3	1	1	1	1	0	0	0	0
NM_013346	29934	SNX12 || sorting nexin 12 (1)	1.56772	0.991874	0.632685	1.95288	0.235603	4.5741	0	0	0	0	0	0	0	0	0	0	0	NA	NA	0	0	0	0	0	0	0	0	0	0	0	0	0	0	0	0	0	0
NM_018410	55355	DKFZp762E1312 || hypothetical protein DKFZp762E1312 (1)	1.56689	0.969125	0.618501	1.99613	0.235603	4.60177	0	0	0	0	0	0	0	0	0	0	0	NA	NA	2	6	1	0	0	0	0	0	0	0	0	0	0	0	0	0	1	0
NM_024336	79191	IRX3 || iroquois homeobox protein 3 (1)	1.56318	1.17088	0.749034	2.13278	0.235603	4.72673	1	0	0	0	0	0	0	0	0	0	0	NA	-18.3	1	1	1	0	0	0	0	0	0	1	0	0	0	0	0	0	1	1
NM_001098634	54502	FLJ20273 || RNA-binding protein (1)	1.56241	1.54173	0.98676	3.1947	0.235603	4.75277	4	4	2	2	1	0	0	0	1	0	0	NA	NA	0	1	0	0	0	2	0	0	3	4	2	0	2	0	0	0	0	0
NM_001014	6204	RPS10 || ribosomal protein S10 (2)	1.56214	1.07196	0.686211	2.08142	0.235603	4.76201	0	0	0	0	0	0	0	0	0	0	0	NA	NA	0	1	0	0	0	0	0	0	0	0	0	0	0	0	0	0	0	0
NM_022761	64776	C11orf1 || chromosome 11 open reading frame 1 (2)	1.56116	1.17108	0.750137	2.3042	0.235603	4.79532	0	0	0	0	0	0	0	0	0	0	0	NA	NA	1	0	0	0	0	0	0	0	0	0	0	0	0	0	0	0	0	0
NM_013279	745	C11orf9 || chromosome 11 open reading frame 9 (1)	1.5548	1.25063	0.804364	2.35975	0.235603	5.0138	3	3	1	3	1	1	0	1	0	1	1	-0.3475	-18.76	0	0	0	0	0	NA	NA	NA	3	3	3	1	1	1	0	0	0	0
NM_004577	5723	PSPH || phosphoserine phosphatase (2)	1.55471	0.870458	0.559886	1.82383	0.235603	5.01703	0	0	0	0	0	0	0	0	0	0	0	NA	-16.55	1	1	1	0	0	1	0	0	0	0	0	0	0	0	0	0	1	0
NM_052859	91869	RFT1 || RFT1 homolog (S. cerevisiae) (1)	1.5524	0.83	0.534658	1.77273	0.235603	5.0975	0	0	0	0	0	0	0	0	0	0	0	NA	NA	0	1	0	0	0	NA	NA	NA	0	0	0	0	0	0	0	0	0	0
NM_003427	7629	ZNF76 || zinc finger protein 76 (expressed in testis) (1)	1.55001	1.16496	0.751583	2.2134	0.235603	5.18117	0	0	0	0	0	0	0	0	0	0	0	NA	NA	0	0	0	0	0	0	0	0	0	0	0	0	0	0	0	0	0	0
NA	376	ARF2 || ADP-ribosylation factor 2 (1)	1.54968	0.885283	0.571268	1.84972	0.235603	5.19261	NA	NA	NA	NA	NA	0	0	0	0	0	0	NA	NA	NA	NA	NA	NA	NA	NA	NA	NA	NA	NA	NA	NA	NA	NA	NA	NA	NA	NA
NM_001002265	220972	MARCH8 || membrane-associated ring finger (C3HC4) 8 (1)	1.54885	0.89875	0.58027	1.86536	0.235603	5.22198	1	0	0	1	0	0	0	0	0	1	0	-0.1282	-17.07	0	0	0	0	0	0	0	0	1	1	1	1	0	0	0	0	0	0
NM_024613	79666	PLEKHF2 || pleckstrin homology domain containing, family F (with FYVE domain) member 2 (1)	1.54837	1.06058	0.684967	2.00768	0.235603	5.2388	2	2	1	1	1	0	0	0	0	0	1	-0.3294	NA	0	0	0	0	0	0	0	0	1	2	1	0	1	0	0	0	0	0
NM_020360	57048	PLSCR3 || phospholipid scramblase 3 (1)	1.54772	1.40996	0.910989	2.66401	0.235603	5.26175	2	1	1	1	1	1	0	0	0	1	0	-0.3587	-23.72	1	1	1	0	0	0	0	0	1	2	1	1	1	1	0	0	1	0
NM_005110	9945	GFPT2 || glutamine-fructose-6-phosphate transaminase 2 (1)	1.54638	1.10646	0.715515	2.31794	0.235603	5.30936	1	1	1	0	0	1	0	0	0	1	0	-0.1484	-17.08	0	0	0	0	0	0	0	0	0	1	0	0	1	1	0	0	0	0
NM_013276	23729	CARKL || carbohydrate kinase-like (1)	1.54557	1.12104	0.725326	2.26687	0.235603	5.33819	2	2	2	1	1	0	0	0	0	0	1	-0.5368	-19.25	2	1	1	0	0	0	0	0	1	2	1	0	2	0	0	0	1	0
NM_000190	3145	HMBS || hydroxymethylbilane synthase (37)	1.54039	1.056	0.685539	2.11733	0.235603	5.52388	1	1	0	0	0	0	0	0	0	0	0	NA	-16.79	0	0	0	0	0	0	0	0	0	1	0	0	0	0	0	0	0	0
NM_172037	157506	RDH10 || retinol dehydrogenase 10 (all-trans) (3)	1.5401	1.11854	0.72628	2.394	0.235603	5.53459	1	1	1	0	0	1	0	0	0	1	0	-0.3055	NA	0	1	0	0	0	0	0	0	0	1	0	0	1	1	0	0	0	0
NM_001037163	84792	MGC12966 || hypothetical protein MGC12966 (2)	1.53897	0.983917	0.639334	2.07969	0.235603	5.57535	0	0	0	0	0	0	0	0	0	0	0	NA	-20.65	0	0	0	0	0	0	0	0	0	0	NA	NA	NA	NA	NA	NA	NA	NA
NM_000021	5663	PSEN1 || presenilin 1 (Alzheimer disease 3) (2)	1.53864	1.05987	0.688837	2.06	0.235603	5.58724	1	1	0	0	0	0	0	0	0	0	0	NA	-16.45	1	1	1	1	1	0	0	0	0	1	0	0	0	0	1	1	1	1
NM_001281	1155	CKAP1 || cytoskeleton associated protein 1 (1)	1.53786	1.33746	0.869686	2.3471	0.235603	5.61562	0	0	0	0	0	0	0	0	0	0	0	NA	NA	0	0	0	0	0	0	0	0	0	0	0	0	0	0	0	0	0	0
NM_203374	147808	LOC147808 || similar to zinc finger protein (1)	1.53652	1.31125	0.853388	2.50354	0.235603	5.66455	0	0	0	0	0	0	0	0	0	0	0	NA	NA	2	2	1	0	0	NA	NA	NA	0	0	0	0	0	0	0	0	1	0
NM_152766	254863	MGC40107 || hypothetical protein MGC40107 (1)	1.5356	1.12912	0.735297	2.15368	0.235603	5.69814	0	0	0	0	0	0	0	0	0	0	0	NA	NA	1	0	0	0	0	NA	NA	NA	0	0	0	0	0	0	0	0	0	0
NM_005870	10284	SAP18 || sin3-associated polypeptide, 18kDa (1)	1.53406	1.064	0.693584	2.11787	0.235603	5.75484	0	1	0	0	0	0	0	0	0	0	0	NA	NA	0	0	0	0	0	0	0	0	0	0	0	0	0	0	0	0	0	0
NM_024098	79080	MGC2574 || hypothetical protein MGC2574 (3)	1.53394	1.07625	0.701623	2.15496	0.235603	5.75913	1	2	1	0	0	1	0	0	0	1	0	-0.2023	-19.57	0	0	0	0	0	0	0	0	0	1	0	0	1	1	0	0	0	0
NM_001098721	2786	GNG4 || guanine nucleotide binding protein (G protein), gamma 4 (1)	1.53378	1.01954	0.664723	2.02379	0.235603	5.76501	2	2	0	1	0	0	0	0	0	0	0	NA	-20.85	0	1	0	0	0	0	0	0	2	2	1	0	0	0	0	0	0	0
NM_001514	2959	GTF2B || general transcription factor IIB (2)	1.53265	1.19067	0.776867	2.32386	0.235603	5.80672	0	0	0	0	0	0	0	0	0	0	0	NA	NA	0	0	0	0	0	0	0	0	0	0	0	0	0	0	0	0	0	0
NM_002655	5324	PLAG1 || pleiomorphic adenoma gene 1 (1)	1.53152	1.21829	0.795477	2.52936	0.235603	5.84848	2	3	1	1	1	1	0	1	0	1	0	-0.2167	NA	0	1	0	0	0	2	0	0	2	2	1	0	1	1	0	0	0	0
NM_017779	55635	DEPDC1 || DEP domain containing 1 (2)	1.53019	1.32271	0.864411	2.40671	0.235603	5.89815	3	1	1	1	0	0	0	0	1	0	1	-0.3731	-23.82	0	2	0	0	0	NA	NA	NA	1	3	1	0	1	0	0	0	0	0
NM_015473	25938	C14orf125 || chromosome 14 open reading frame 125 (2)	1.52692	1.10833	0.725864	2.2169	0.235603	6.0203	1	0	0	0	0	0	0	0	0	0	0	NA	-16.86	8	5	1	2	1	0	0	0	0	1	0	0	0	0	2	0	1	0
NM_032286	84246	TRG20 || hypothetical protein MGC5309 (1)	1.52592	1.32621	0.869121	2.52486	0.235603	6.05775	0	0	0	0	0	0	0	0	0	0	0	NA	NA	0	1	0	0	0	NA	NA	NA	0	0	0	0	0	0	0	0	0	0
NM_153335	92335	LYK5 || protein kinase LYK5 (1)	1.5206	1.04806	0.689239	2.14436	0.235603	6.25939	0	2	0	0	0	0	0	0	0	0	0	NA	-18.77	1	1	1	0	0	0	0	0	0	0	0	0	0	0	0	0	1	1
NM_004354	901	CCNG2 || cyclin G2 (2)	1.51969	1.49115	0.98122	2.90561	0.235603	6.29434	0	1	0	0	0	0	0	0	0	0	0	NA	NA	2	1	1	1	0	0	0	0	0	0	0	0	0	0	1	1	1	1
NM_003093	6631	SNRPC || small nuclear ribonucleoprotein polypeptide C (2)	1.51842	1.07807	0.709992	2.09522	0.235603	6.34276	0	0	0	0	0	0	0	0	0	0	0	NA	NA	0	0	0	0	0	NA	NA	NA	1	0	0	0	0	0	0	0	0	0
NM_001005735	11200	CHEK2 || CHK2 checkpoint homolog (S. pombe) (2)	1.51837	1.00985	0.665093	2.1017	0.235603	6.34496	0	0	0	0	0	0	0	0	0	0	0	NA	NA	1	2	0	1	0	0	0	0	0	0	0	0	0	0	0	0	0	0
NM_033502	55809	TRERF1 || transcriptional regulating factor 1 (1)	1.51691	1.33494	0.880036	2.92183	0.235603	6.40087	0	0	0	0	0	0	0	0	0	0	0	NA	NA	0	0	0	0	0	0	0	0	0	0	0	0	0	0	0	0	0	0
NM_003600	6790	STK6 || serine/threonine kinase 6 (1)	1.51633	0.992917	0.654817	2.12568	0.235603	6.42355	1	1	1	1	1	0	0	0	0	0	1	-0.3859	-31.08	0	0	0	0	0	1	0	0	1	1	1	0	1	0	0	0	0	0
NM_002875	5888	RAD51 || RAD51 homolog (RecA homolog, E. coli) (S. cerevisiae) (5)	1.51586	0.905667	0.597459	1.87975	0.235603	6.44146	1	2	1	1	1	0	0	0	0	0	1	-0.3125	NA	0	0	0	0	0	0	0	0	1	1	1	0	1	0	0	0	0	0
NA	23268	DNMBP || dynamin binding protein (1)	1.51499	1.45917	0.963156	4.21142	0.235603	6.47547	NA	NA	NA	NA	NA	0	0	0	0	0	0	NA	NA	NA	NA	NA	NA	NA	NA	NA	NA	NA	NA	NA	NA	NA	NA	NA	NA	NA	NA
NM_001690	523	ATP6V1A || ATPase, H+ transporting, lysosomal 70kDa, V1 subunit A (3)	1.51147	0.922521	0.610349	1.91953	0.235603	6.61261	0	1	0	0	0	0	0	0	0	0	0	NA	NA	1	1	1	0	0	0	0	0	0	0	0	0	0	0	0	0	1	0
NM_014016	22908	SACM1L || SAC1 suppressor of actin mutations 1-like (yeast) (1)	1.50669	0.976667	0.648219	2.06353	0.235603	6.80061	2	0	0	0	0	0	0	0	0	0	0	NA	NA	3	1	1	0	0	NA	NA	NA	0	2	0	0	0	0	0	0	1	1
NM_018115	55153	SDAD1 || SDA1 domain containing 1 (1)	1.50239	0.919167	0.611805	1.87987	0.235603	6.97244	2	1	0	1	0	0	0	0	0	1	0	-0.1958	NA	0	0	0	0	0	0	0	0	2	2	1	1	0	0	0	0	0	0
NM_003141	6737	TRIM21 || tripartite motif-containing 21 (1)	1.50138	0.951792	0.633946	1.92971	0.235603	7.013	1	0	0	0	0	0	0	0	0	0	0	NA	-17.02	1	2	1	0	0	0	0	0	0	1	0	0	0	0	0	0	1	0
NM_007169	10400	PEMT || phosphatidylethanolamine N-methyltransferase (2)	1.49999	1.15063	0.76709	2.12342	0.235603	7.06892	2	2	1	0	0	0	0	0	0	0	1	-0.0619	-18.04	0	0	0	0	0	0	0	0	0	2	0	0	1	0	0	0	0	0
NM_012080	8226	HDHD1A || haloacid dehalogenase-like hydrolase domain containing 1A (1)	1.49947	0.860167	0.573649	1.8218	0.235603	7.09	0	0	0	0	0	0	0	0	0	0	0	NA	NA	1	1	1	0	0	0	0	0	0	0	0	0	0	0	0	0	0	0
NM_004044	471	ATIC || 5-aminoimidazole-4-carboxamide ribonucleotide formyltransferase/IMP cyclohydrolase (2)	1.49759	1.05433	0.704019	2.10806	0.235603	7.16594	0	0	0	0	0	0	0	0	0	0	0	NA	NA	1	0	0	0	0	NA	NA	NA	0	0	0	0	0	0	0	0	0	0
NA	124685	na || similar to Myosin light polypeptide 6 (Myosin light chain alkali 3) (Myosin light chain 3) (MLC-3) (LC17) (1)	1.49602	1.23075	0.822683	2.24421	0.235603	7.22999	NA	NA	NA	NA	NA	0	0	0	0	0	0	NA	NA	NA	NA	NA	NA	NA	NA	NA	NA	NA	NA	NA	NA	NA	NA	NA	NA	NA	NA
NM_022787	64802	NMNAT1 || nicotinamide nucleotide adenylyltransferase 1 (3)	1.4958	0.998958	0.667844	1.9638	0.235603	7.23905	2	4	2	1	1	0	0	0	0	0	1	-0.4847	-17.46	0	0	0	0	0	0	0	0	1	2	1	0	2	0	0	0	0	0
NM_014300	23478	SEC11L1 || SEC11-like 1 (S. cerevisiae) (1)	1.49138	1.12229	0.752515	2.45547	0.235603	7.42033	1	1	0	0	0	0	0	0	0	0	0	NA	NA	0	0	0	0	0	0	0	0	0	1	0	0	0	0	0	0	0	0
NM_006589	10712	C1orf2 || chromosome 1 open reading frame 2 (1)	1.49028	1.13154	0.759281	2.23654	0.235603	7.4659	0	1	0	0	0	0	0	0	0	0	0	NA	NA	0	1	0	0	0	0	0	0	0	0	0	0	0	0	0	0	0	0
NM_030805	81562	LMAN2L || lectin, mannose-binding 2-like (2)	1.49026	1.39171	0.933871	2.6834	0.235603	7.4668	3	2	1	2	0	1	0	0	0	1	1	-0.2461	-19.11	1	1	1	0	0	NA	NA	NA	2	3	2	1	1	0	0	0	1	0
NM_014814	9861	PSMD6 || proteasome (prosome, macropain) 26S subunit, non-ATPase, 6 (2)	1.48913	1.14187	0.766808	2.1062	0.235603	7.51368	0	0	0	0	0	0	0	0	0	0	0	NA	NA	1	0	0	1	0	NA	NA	NA	0	0	0	0	0	0	1	0	0	0
NM_032182	23172	KIAA0157 || KIAA0157 (1)	1.48858	1.04588	0.702598	2.00542	0.235603	7.53636	3	0	0	0	0	0	0	0	0	0	0	NA	-20.66	0	0	0	0	0	NA	NA	NA	1	3	0	0	0	0	0	0	0	0
NM_001099650	283464	LOC283464 || hypothetical protein LOC283464 (2)	1.48787	0.928542	0.624073	1.96345	0.235603	7.56583	6	2	2	3	1	0	0	0	0	0	0	NA	-24.64	0	0	0	0	0	0	0	0	4	6	3	0	2	0	0	0	0	0
NM_001007027	79053	ALG8 || asparagine-linked glycosylation 8 homolog (yeast, alpha-1,3-glucosyltransferase) (4)	1.48523	1.14463	0.770673	2.44022	0.235603	7.67651	0	0	0	0	0	0	0	0	0	0	0	NA	NA	2	1	1	0	0	0	0	0	0	0	0	0	0	0	0	0	1	1
NM_002755	5604	MAP2K1 || mitogen-activated protein kinase kinase 1 (1)	1.4841	1.04957	0.707215	2.19248	0.235603	7.72411	0	1	0	0	0	0	0	0	0	0	0	NA	NA	0	0	0	0	0	0	0	0	0	0	0	0	0	0	0	0	0	0
NM_000919	5066	PAM || peptidylglycine alpha-amidating monooxygenase (2)	1.48265	0.942875	0.635939	1.92624	0.235603	7.78505	1	1	1	0	0	1	0	0	0	1	0	-0.1608	NA	1	2	0	0	0	0	0	0	0	1	0	0	1	1	0	0	0	0
NM_006855	11015	KDELR3 || KDEL (Lys-Asp-Glu-Leu) endoplasmic reticulum protein retention receptor 3 (3)	1.48245	0.836396	0.5642	1.77383	0.235603	7.79365	2	1	0	0	0	0	0	0	0	0	0	NA	-23.31	0	1	0	0	0	0	0	0	1	2	0	0	0	0	0	0	0	0
NM_004529	4300	MLLT3 || myeloid/lymphoid or mixed-lineage leukemia (trithorax homolog, Drosophila); translocated to, 3 (3)	1.48066	1.07333	0.724903	2.20677	0.235603	7.86944	1	0	0	1	0	1	1	0	0	1	0	-0.1576	-22.34	1	1	1	0	0	0	0	0	2	1	1	1	0	0	0	0	1	0
NM_032175	84135	FLJ12787 || Src-associated protein SAW (1)	1.47758	1.07375	0.726696	2.23003	0.235603	8.00071	1	1	1	0	0	0	0	0	0	0	1	-0.195	NA	0	0	0	0	0	0	0	0	0	1	0	0	1	0	0	0	0	0
NM_024735	79791	FBXO31 || F-box protein 31 (1)	1.47523	1.14318	0.774914	2.19289	0.235603	8.10131	2	1	1	0	0	0	0	0	0	0	1	-0.1241	-20.29	0	0	0	0	0	NA	NA	NA	0	2	0	0	1	0	0	0	0	0
NM_032336	84296	SLD5 || SLD5 homolog (2)	1.47491	1.0725	0.727161	2.16733	0.235603	8.11512	0	0	0	0	0	0	0	0	0	0	0	NA	NA	0	0	0	0	0	0	1	0	0	0	0	0	0	0	0	0	0	0
NM_015322	10116	FEM1B || fem-1 homolog b (C. elegans) (1)	1.47442	1.005	0.681625	2.16287	0.235603	8.13655	0	0	0	0	0	0	0	0	0	0	0	NA	NA	0	2	0	0	0	0	0	0	0	0	0	0	0	0	0	0	0	0
NM_000666	95	ACY1 || aminoacylase 1 (3)	1.47395	1.24167	0.842407	2.39643	0.235603	8.15667	0	0	0	0	0	0	0	0	0	0	0	NA	NA	1	3	0	0	0	0	0	0	0	0	0	0	0	0	0	0	0	0
NM_178865	347735	TDE2L || tumor differentially expressed 2-like (1)	1.46923	1.16413	0.792335	2.30708	0.518978	8.36171	2	4	2	1	1	0	0	0	0	1	1	-0.4576	NA	1	2	1	0	0	0	0	0	1	2	1	1	2	1	0	0	1	0
NM_001010984	83932	DKFZP547N043 || hypothetical protein DKFZp547N043 (1)	1.46903	1.07142	0.729338	2.02411	0.518978	8.37079	3	1	1	1	0	0	0	0	0	0	1	-0.065	-19.35	0	0	0	0	0	0	0	0	1	3	1	0	1	0	0	0	0	0
NM_005842	10253	SPRY2 || sprouty homolog 2 (Drosophila) (1)	1.46855	1.07558	0.732413	2.08601	0.518978	8.39172	1	0	0	1	0	1	0	0	0	1	0	-0.1238	-17.4	3	1	1	1	0	0	0	0	1	1	1	1	0	0	1	1	1	0
NM_004886	9546	APBA3 || amyloid beta (A4) precursor protein-binding, family A, member 3 (X11-like 2) (1)	1.46492	1.42496	0.972722	2.92057	0.518978	8.55141	1	1	1	0	0	1	0	0	0	1	0	-0.0718	NA	1	3	1	0	0	0	0	0	0	1	0	0	1	1	0	0	1	0
NM_001031679	253827	MSRB3 || methionine sulfoxide reductase B3 (1)	1.46265	1.32683	0.907145	2.49922	0.518978	8.6521	1	1	0	1	0	0	0	0	0	0	1	-0.1557	-19.26	2	1	1	0	0	0	0	0	2	1	1	0	0	0	0	0	1	1
NM_015459	25923	DKFZP564J0863 || DKFZP564J0863 protein (3)	1.46098	0.84725	0.579919	1.78606	0.518978	8.72635	1	1	1	0	0	1	0	0	0	1	0	-0.2812	-18.47	1	1	1	0	0	0	0	0	0	1	0	0	1	1	0	0	1	0
NM_019008	54471	FLJ20232 || hypothetical protein FLJ20232 (2)	1.46041	0.945042	0.647109	1.92129	0.518978	8.75204	5	1	0	0	0	0	0	0	0	0	0	NA	-26.39	0	1	0	0	0	1	1	1	2	5	0	0	0	0	0	0	0	0
NM_015651	26147	PHF19 || PHD finger protein 19 (1)	1.45928	1.02333	0.701261	1.98978	0.518978	8.80263	3	6	3	0	0	1	0	0	1	1	1	-0.4806	-18.44	0	1	0	0	0	0	0	0	0	3	0	0	3	1	0	0	0	0
NA	11257	TP53AP1 || TP53 activated protein 1 (1)	1.45921	1.09121	0.747808	2.06976	0.518978	8.8056	NA	NA	NA	NA	NA	0	0	0	0	0	0	NA	NA	NA	NA	NA	NA	NA	NA	NA	NA	NA	NA	NA	NA	NA	NA	NA	NA	NA	NA
NM_005952	4501	MT1X || metallothionein 1X (3)	1.45836	1.1025	0.755988	2.0347	0.518978	8.84387	0	0	0	0	0	0	0	0	0	0	0	NA	NA	0	2	0	0	0	0	0	0	0	0	0	0	0	0	0	0	0	0
NM_001654	369	ARAF || v-raf murine sarcoma 3611 viral oncogene homolog (2)	1.45814	1.04871	0.719208	2.13446	0.518978	8.85344	1	2	1	0	0	0	0	0	0	0	1	-0.1558	-16.33	3	2	1	3	1	0	0	0	0	1	0	0	1	0	3	2	1	1
NM_032145	84085	FBXO30 || F-box protein 30 (1)	1.45729	0.867083	0.594996	1.83588	0.518978	8.89169	3	0	0	1	0	1	1	1	0	1	0	-0.1516	-21.6	1	1	1	0	0	0	0	0	1	3	1	1	0	0	0	0	1	0
NM_004205	9099	USP2 || ubiquitin specific protease 2 (4)	1.45572	0.946958	0.650509	2.01201	0.518978	8.96276	0	0	0	0	0	0	0	1	0	0	0	NA	-17.05	0	2	0	0	0	0	0	0	0	0	0	0	0	0	0	0	0	0
NM_004796	9369	NRXN3 || neurexin 3 (2)	1.45555	1.27234	0.874129	2.58802	0.518978	8.97049	0	0	0	0	0	0	0	0	0	0	0	NA	NA	1	0	0	1	0	0	0	0	0	0	0	0	0	0	1	1	0	0
NM_033198	94005	PIGS || phosphatidylinositol glycan, class S (1)	1.45545	0.999146	0.686485	2.15372	0.518978	8.97482	1	0	0	0	0	0	0	0	0	0	0	NA	-17.28	4	2	0	1	0	NA	NA	NA	0	1	0	0	0	0	1	1	0	0
NM_022060	63874	ABHD4 || abhydrolase domain containing 4 (1)	1.45497	1.00125	0.688159	2.09226	0.518978	8.99669	2	1	1	0	0	1	0	1	0	1	0	-0.0618	-18.25	0	2	0	0	0	0	0	0	0	2	0	0	1	1	0	0	0	0
NM_005866	10280	OPRS1 || opioid receptor, sigma 1 (2)	1.45362	1.37746	0.947605	2.82726	0.518978	9.05795	2	0	0	1	0	1	0	1	0	1	0	-0.0674	-18.05	1	1	1	0	0	0	0	0	1	2	1	1	0	0	0	0	1	0
NM_007240	11266	DUSP12 || dual specificity phosphatase 12 (1)	1.44999	0.943333	0.650577	2.00449	0.518978	9.22357	1	0	0	0	0	0	0	0	0	0	0	NA	-17.09	0	0	0	0	0	NA	NA	NA	0	1	0	0	0	0	0	0	0	0
NM_003098	6640	SNTA1 || syntrophin, alpha 1 (dystrophin-associated protein A1, 59kDa, acidic component) (1)	1.44999	1.28558	0.886616	2.47071	0.518978	9.22378	1	1	1	0	0	1	0	0	0	1	0	-0.179	-17.4	0	0	0	0	0	0	0	0	0	1	0	0	1	1	0	0	0	0
NM_001039711	9191	DEDD || death effector domain containing (2)	1.44816	0.828667	0.572222	1.77996	0.518978	9.30807	1	1	0	0	0	0	0	0	0	0	0	NA	-17.13	0	1	0	0	0	0	0	0	0	1	0	0	0	0	0	0	0	0
NM_138476	145553	MGC5987 || hypothetical protein MGC5987 (1)	1.44576	1.01896	0.704791	2.0599	0.518978	9.41881	0	0	0	0	0	0	0	0	0	0	0	NA	NA	0	1	0	0	0	0	0	0	0	0	0	0	0	0	0	0	0	0
NM_001008392	10217	CTDSPL || CTD (carboxy-terminal domain, RNA polymerase II, polypeptide A) small phosphatase-like (3)	1.44559	0.943688	0.652805	1.9838	0.518978	9.42675	3	3	1	2	0	1	0	0	0	1	1	-0.2719	NA	0	1	0	0	0	NA	NA	NA	4	3	2	1	1	1	0	0	0	0
NM_005796	10204	NUTF2 || nuclear transport factor 2 (2)	1.44369	1.06896	0.740433	2.00682	0.518978	9.51486	1	0	0	0	0	0	0	1	0	0	0	NA	-18.05	1	0	0	1	0	0	0	0	0	1	0	0	0	0	1	1	0	0
NM_006700	10906	TRAFD1 || TRAF-type zinc finger domain containing 1 (2)	1.4431	0.967958	0.670748	1.95183	0.518978	9.54245	1	0	0	0	0	0	0	0	0	0	0	NA	-16.69	2	1	1	1	1	0	0	0	1	1	0	0	0	0	1	1	1	0
NM_024044	79008	GIYD2 || GIY-YIG domain containing 2 (1)	1.44196	1.16312	0.806627	2.11033	0.518978	9.5957	0	0	0	0	0	0	0	0	0	0	0	NA	NA	0	1	0	0	0	0	0	0	0	0	NA	NA	NA	NA	NA	NA	NA	NA
NM_020644	56674	C11orf15 || chromosome 11 open reading frame 15 (3)	1.43725	0.983042	0.683975	2.03789	0.518978	9.81754	0	1	0	0	0	0	0	0	0	0	0	NA	NA	1	1	0	0	0	0	1	0	0	0	0	0	0	0	0	0	0	0
NM_003627	8501	SLC43A1 || solute carrier family 43, member 1 (1)	1.4368	0.96025	0.668328	2.0057	0.518978	9.83896	0	1	0	0	0	0	0	0	0	0	0	NA	NA	5	3	2	1	0	0	0	0	0	0	0	0	0	0	1	0	2	0
NM_001316	1434	CSE1L || CSE1 chromosome segregation 1-like (yeast) (15)	1.43318	1.08954	0.760227	2.02128	0.518978	10.0111	0	0	0	0	0	0	0	0	0	0	0	NA	NA	3	1	0	0	0	0	0	0	0	0	0	0	0	0	0	0	0	0
NM_001640	327	APEH || N-acylaminoacyl-peptide hydrolase (1)	1.432	0.800088	0.558722	1.73088	0.518978	10.0677	0	0	0	0	0	0	0	0	0	0	0	NA	NA	2	3	0	0	0	0	0	0	0	0	0	0	0	0	0	0	0	0
NM_017414	11274	USP18 || ubiquitin specific protease 18 (2)	1.43148	0.910083	0.635765	1.84297	0.518978	10.0926	0	0	0	0	0	0	0	0	0	0	0	NA	NA	1	0	0	1	0	0	1	0	1	0	0	0	0	0	1	0	0	0
NM_006432	10577	NPC2 || Niemann-Pick disease, type C2 (1)	1.43124	1.00496	0.702163	2.09611	0.518978	10.104	0	1	0	0	0	0	0	0	0	0	0	NA	NA	0	0	0	0	0	0	0	0	0	0	0	0	0	0	0	0	0	0
NM_021729	55823	VPS11 || vacuolar protein sorting 11 (yeast) (3)	1.4308	0.896458	0.626541	1.85981	0.518978	10.1249	1	0	0	0	0	0	0	0	0	0	0	NA	-21.04	2	1	1	0	0	NA	NA	NA	0	1	0	0	0	0	0	0	1	1
NM_178507	220323	NS5ATP13TP2 || NS5ATP13TP2 protein (1)	1.42857	1.22731	0.859114	2.57403	0.518978	10.2324	2	2	2	0	0	0	0	0	0	1	1	-0.2453	-17.92	0	0	0	0	0	0	0	0	1	2	0	0	2	1	0	0	0	0
NM_001015048	9529	BAG5 || BCL2-associated athanogene 5 (2)	1.42791	1.08875	0.76248	2.02082	0.518978	10.2647	1	2	1	0	0	0	0	0	0	0	1	-0.1172	-16.98	0	0	0	0	0	0	0	0	1	1	0	0	1	0	0	0	0	0
NM_024728	79783	C7orf10 || chromosome 7 open reading frame 10 (1)	1.42742	1.15979	0.812507	2.36493	0.518978	10.2881	1	1	1	0	0	0	0	0	0	0	1	-0.3028	-17.47	0	0	0	0	0	NA	NA	NA	0	1	0	0	1	0	0	0	0	0
NM_012333	26292	MYCBP || c-myc binding protein (2)	1.42686	0.823125	0.576878	1.75705	0.518978	10.3153	2	2	0	2	0	1	0	0	0	1	1	-0.0632	-17.19	0	0	0	0	0	0	0	0	2	2	2	1	0	0	0	0	0	0
NM_002632	5228	PGF || placental growth factor, vascular endothelial growth factor-related protein (1)	1.42343	1.11996	0.786801	2.14238	0.518978	10.4824	1	1	1	0	0	1	0	0	0	1	0	-0.2594	-23.47	0	0	0	0	0	0	0	0	0	1	0	0	1	1	0	0	0	0
NA	158104	na || similar to 40S ribosomal protein S10 (1)	1.42338	1.11335	0.782189	2.08093	0.518978	10.4848	NA	NA	NA	NA	NA	0	0	0	0	0	0	NA	NA	NA	NA	NA	NA	NA	NA	NA	NA	NA	NA	NA	NA	NA	NA	NA	NA	NA	NA
NM_144607	124637	FLJ32499 || hypothetical protein FLJ32499 (1)	1.42225	0.930375	0.654158	1.94329	0.518978	10.5403	3	3	1	0	0	0	0	0	0	0	1	-0.1864	-16.85	0	0	0	0	0	0	0	0	0	3	0	0	1	0	0	0	0	0
NA	389127	na || similar to 40S ribosomal protein S10 (1)	1.42023	0.96339	0.678332	1.88729	0.518978	10.6394	NA	NA	NA	NA	NA	0	0	0	0	0	0	NA	NA	NA	NA	NA	NA	NA	NA	NA	NA	NA	NA	NA	NA	NA	NA	NA	NA	NA	NA
NM_079834	113178	SCAMP4 || secretory carrier membrane protein 4 (1)	1.41511	1.07371	0.758746	1.97093	0.518978	10.8935	1	2	1	1	1	0	0	0	0	0	1	-0.2709	NA	0	0	0	0	0	0	0	0	1	1	1	0	1	0	0	0	0	0
NM_001012754	387921	LOC387921 || similar to RIKEN cDNA 8030451K01 (1)	1.41488	0.980103	0.692713	2.07592	0.518978	10.9051	2	0	0	1	0	0	0	0	0	0	1	-0.2101	NA	0	0	0	0	0	0	0	0	1	2	1	0	0	0	0	0	0	0
NM_152678	201627	FLJ34969 || hypothetical protein FLJ34969 (1)	1.41456	0.967125	0.683693	2.01624	0.518978	10.9209	3	2	2	0	0	1	0	0	0	1	0	-0.4322	-21.69	1	0	0	0	0	0	0	0	0	3	0	0	2	2	0	0	0	0
NM_017644	54800	DRE1 || DRE1 protein (2)	1.41406	0.853125	0.603315	1.81955	0.518978	10.9457	5	3	3	2	1	0	0	0	0	1	1	-0.8276	-25.7	0	0	0	0	0	0	0	0	3	5	2	2	3	2	0	0	0	0
NM_032256	84216	DKFZp434K2435 || hypothetical protein DKFZp434K2435 (1)	1.41317	0.925292	0.654763	1.92098	0.518978	10.9904	1	2	1	0	0	0	0	0	0	1	0	-0.1662	-20.45	0	0	0	0	0	0	0	0	0	1	0	0	1	1	0	0	0	0
NM_001033575	285193	na || similar to RIKEN cDNA 0710001B24 (1)	1.41156	0.956625	0.677708	1.94437	0.518978	11.0713	0	0	0	0	0	0	0	0	0	0	0	NA	-17.13	0	0	0	0	0	0	0	0	0	0	0	0	0	0	0	0	0	0
NM_004358	994	CDC25B || cell division cycle 25B (2)	1.41011	0.949792	0.673558	2.01066	0.518978	11.1442	2	2	1	0	0	0	0	0	0	0	1	-0.0789	-16.18	0	0	0	0	0	1	1	0	0	2	0	0	1	0	0	0	0	0
NA	374882	UNQ501 || MBC3205 (2)	1.40927	1.06856	0.758236	2.19769	0.518978	11.1866	NA	NA	NA	NA	NA	0	0	0	0	0	0	NA	NA	NA	NA	NA	NA	NA	NA	NA	NA	NA	NA	NA	NA	NA	NA	NA	NA	NA	NA
NM_006742	5681	PSKH1 || protein serine kinase H1 (1)	1.40893	1.02142	0.72496	2.10783	0.518978	11.204	7	5	3	1	0	1	0	0	0	1	1	-0.3116	-20.42	0	1	0	0	0	1	0	0	2	7	1	0	3	1	0	0	0	0
NM_022776	114885	OSBPL11 || oxysterol binding protein-like 11 (1)	1.40763	1.00708	0.715447	2.05424	0.518978	11.2699	1	2	1	1	1	1	1	1	0	1	0	-0.3049	-24.44	2	0	0	0	0	0	0	0	1	1	1	1	1	1	0	0	0	0
NM_183372	200030	LOC200030 || hypothetical protein LOC200030 (1)	1.40695	0.797917	0.567125	1.74438	0.518978	11.3043	1	2	1	0	0	0	0	0	0	0	1	-0.2793	-23.13	1	1	1	0	0	1	1	0	1	1	NA	NA	NA	NA	NA	NA	NA	NA
NM_012345	26747	NUFIP1 || nuclear fragile X mental retardation protein interacting protein 1 (2)	1.40578	0.999625	0.711082	2.0946	0.518978	11.3639	4	2	1	2	0	0	0	0	0	0	1	-0.5077	NA	0	0	0	0	0	NA	NA	NA	2	4	2	0	1	0	0	0	0	0
NM_004130	2992	GYG || glycogenin (4)	1.40417	1.14813	0.817654	2.17833	0.518978	11.4461	0	0	0	0	0	0	0	0	0	0	0	NA	NA	0	0	0	0	0	0	0	0	0	0	0	0	0	0	0	0	0	0
NM_002267	3839	KPNA3 || karyopherin alpha 3 (importin alpha 4) (2)	1.40205	0.843229	0.601428	1.83609	0.518978	11.555	1	1	1	0	0	1	0	1	0	1	0	-0.2977	NA	0	0	0	0	0	0	0	0	0	1	0	0	1	1	0	0	0	0
NM_001665	391	RHOG || ras homolog gene family, member G (rho G) (1)	1.40171	1.29953	0.9271	3.18085	0.518978	11.5721	5	5	4	1	1	1	0	0	0	1	1	-0.7996	-17.88	0	1	0	0	0	0	0	0	2	5	1	1	4	3	0	0	0	0
NM_019605	56256	SERTAD4 || SERTA domain containing 4 (1)	1.4002	1.12516	0.803574	2.28945	0.518978	11.6502	1	1	1	1	1	1	1	0	0	1	0	-0.4118	-17.09	1	1	0	0	0	0	0	0	1	1	1	1	1	1	0	0	0	0
NM_005879	10293	TRIP || TRAF interacting protein (1)	1.40015	0.943542	0.673885	1.87103	0.518978	11.6525	1	0	0	0	0	0	0	0	0	0	0	NA	-16.08	2	3	2	0	0	0	0	0	0	1	0	0	0	0	0	0	2	1
NM_003129	6713	SQLE || squalene epoxidase (2)	1.40007	1.05133	0.750916	1.97604	0.518978	11.6568	0	0	0	0	0	0	0	0	0	0	0	NA	NA	1	0	0	0	0	1	1	1	0	0	0	0	0	0	0	0	0	0
NA	339804	LOC339804 || hypothetical gene supported by AK075484; BC014578 (1)	1.39776	1.19562	0.855381	2.68206	0.518978	11.7761	NA	NA	NA	NA	NA	0	0	0	0	0	0	NA	NA	NA	NA	NA	NA	NA	NA	NA	NA	NA	NA	NA	NA	NA	NA	NA	NA	NA	NA
NM_003711	8611	PPAP2A || phosphatidic acid phosphatase type 2A (3)	1.39479	0.819458	0.587514	1.75609	0.518978	11.9311	0	0	0	0	0	0	0	0	0	0	0	NA	NA	1	0	0	0	0	0	0	0	0	0	0	0	0	0	0	0	0	0
NM_001256	996	CDC27 || cell division cycle 27 (2)	1.39169	1.00775	0.724118	2.08546	0.518978	12.0934	0	0	0	0	0	0	0	0	0	0	0	NA	NA	0	0	0	0	0	0	0	0	0	0	0	0	0	0	0	0	0	0
NM_017645	54801	FAM29A || family with sequence similarity 29, member A (1)	1.39111	0.830875	0.597273	1.75228	0.518978	12.1239	3	1	0	0	0	0	0	0	0	0	0	NA	-17.88	1	1	0	0	0	0	1	0	0	3	0	0	0	0	0	0	0	0
NM_032802	84888	SPPL2A || signal peptide peptidase-like 2A (2)	1.3897	0.886	0.637546	1.82581	0.518978	12.1983	1	1	1	0	0	1	0	0	0	1	0	-0.2931	-20.34	0	1	0	0	0	0	0	0	0	1	0	0	1	1	0	0	0	0
NM_018222	55742	PARVA || parvin, alpha (2)	1.3888	0.899979	0.648026	1.85717	0.518978	12.246	2	0	0	1	0	0	0	0	0	0	1	-0.0419	-17.79	2	0	0	0	0	NA	NA	NA	1	2	1	0	0	0	0	0	0	0
NM_015383	25832	DJ328E19.C1.1 || hypothetical protein DJ328E19.C1.1 (1)	1.3874	1.13225	0.816092	2.05992	0.518978	12.3201	0	0	0	0	0	0	0	0	0	0	0	NA	-17.16	3	3	3	0	0	NA	NA	NA	1	0	0	0	0	0	0	0	3	0
NM_015516	25987	TSK || tsukushi (1)	1.38698	0.938542	0.67668	1.87654	0.518978	12.3426	2	1	1	0	0	0	0	0	0	1	0	-0.1033	-17.75	3	1	1	0	0	0	0	0	0	2	0	0	1	1	0	0	1	0
NM_001102594	113878	DTX2 || deltex homolog 2 (Drosophila) (2)	1.3861	0.987708	0.712579	1.97129	0.518978	12.3893	0	0	0	0	0	0	0	0	0	0	0	NA	NA	1	3	0	0	0	2	1	1	0	0	0	0	0	0	0	0	0	0
NM_017952	55037	FLJ20758 || FLJ20758 protein (2)	1.38445	1.04904	0.757731	2.08856	0.518978	12.4775	4	1	1	1	1	0	0	0	0	0	1	-0.3455	-21.32	2	2	2	1	1	NA	NA	NA	2	4	1	0	1	0	1	0	2	1
NM_005124	9972	NUP153 || nucleoporin 153kDa (1)	1.38317	0.889333	0.64297	1.86704	0.518978	12.5463	1	0	0	0	0	0	0	0	0	0	0	NA	NA	4	2	0	0	0	0	0	0	0	1	0	0	0	0	0	0	0	0
NM_001085458	1500	CTNND1 || catenin (cadherin-associated protein), delta 1 (1)	1.38311	1.00896	0.729483	1.99856	0.518978	12.549	4	2	2	0	0	1	0	0	1	1	0	-0.1851	-24.17	3	1	0	1	0	1	0	0	0	4	0	0	2	2	1	0	0	0
NM_031426	83543	C9orf58 || chromosome 9 open reading frame 58 (1)	1.38259	1.07917	0.780537	2.38216	0.518978	12.577	4	1	1	2	0	1	0	1	0	1	1	-0.1648	-20.12	0	0	0	0	0	0	1	0	3	4	2	0	1	1	0	0	0	0
NM_005063	6319	SCD || stearoyl-CoA desaturase (delta-9-desaturase) (1)	1.38257	1.14115	0.825382	2.28932	0.518978	12.5782	3	3	1	1	1	1	0	0	0	1	0	-0.1956	-23.97	0	0	0	0	0	0	0	0	1	3	1	1	1	1	0	0	0	0
NM_002268	3840	KPNA4 || karyopherin alpha 4 (importin alpha 3) (2)	1.38234	0.920042	0.665571	2.03418	0.518978	12.5909	2	2	1	0	0	1	0	1	0	1	0	-0.1317	-24.07	0	0	0	0	0	0	0	0	0	2	0	0	1	1	0	0	0	0
NM_138333	116224	C9orf42 || chromosome 9 open reading frame 42 (1)	1.38042	1.15711	0.838229	2.94206	0.518978	12.6941	3	2	1	1	0	1	0	0	0	1	1	-0.147	-19.62	0	0	0	0	0	0	0	0	1	3	1	0	1	1	0	0	0	0
NM_032505	84541	TA-KRP || T-cell activation kelch repeat protein (1)	1.37845	0.94375	0.684644	2.08478	0.518978	12.8003	0	0	0	0	0	0	0	0	0	0	0	NA	NA	1	2	1	0	0	0	0	0	1	0	0	0	0	0	0	0	1	1
NM_015470	26056	RAB11FIP5 || RAB11 family interacting protein 5 (class I) (1)	1.37773	1.02804	0.746185	2.04536	0.518978	12.8395	3	1	1	0	0	1	0	0	0	1	0	-0.1361	-20.3	0	0	0	0	0	0	0	0	0	3	0	0	1	1	0	0	0	0
NM_004905	9588	PRDX6 || peroxiredoxin 6 (2)	1.3776	0.865792	0.62848	1.81474	0.518978	12.8467	2	1	1	0	0	0	0	0	0	0	1	-0.2127	-19.33	0	0	0	0	0	0	0	0	0	2	0	0	1	0	0	0	0	0
NM_033116	91754	NEK9 || NIMA (never in mitosis gene a)- related kinase 9 (1)	1.37193	0.917292	0.668612	2.0225	0.518978	13.156	1	0	0	0	0	0	0	1	1	0	0	NA	-16.5	3	2	1	0	0	NA	NA	NA	0	1	0	0	0	0	0	0	1	0
NM_153689	205327	FLJ38973 || hypothetical protein FLJ38973 (1)	1.37131	0.966458	0.704769	2.11968	0.518978	13.1902	4	2	2	0	0	1	0	0	0	1	1	-0.3479	-19.83	0	0	0	0	0	0	2	0	0	4	0	0	2	1	0	0	0	0
NM_012413	25797	QPCT || glutaminyl-peptide cyclotransferase (glutaminyl cyclase) (2)	1.36878	0.93975	0.686562	1.93482	0.818223	13.3302	0	0	0	0	0	0	0	0	0	0	0	NA	-18.75	1	2	1	1	1	0	0	0	0	0	0	0	0	0	1	1	1	1
NM_000018	37	ACADVL || acyl-Coenzyme A dehydrogenase, very long chain (2)	1.36744	0.914333	0.668647	1.92556	0.818223	13.4042	1	2	1	0	0	1	0	0	0	1	0	-0.1992	-17.24	0	0	0	0	0	0	0	0	0	1	0	0	1	1	0	0	0	0
NM_006663	10848	PPP1R13L || protein phosphatase 1, regulatory (inhibitor) subunit 13 like (1)	1.36681	1.08062	0.790621	2.10444	0.818223	13.4394	4	2	1	1	0	1	0	0	0	1	1	-0.2975	-18.97	2	0	0	0	0	0	0	0	2	4	1	1	1	0	0	0	0	0
NM_001047434	285381	ZCSL2 || zinc finger, CSL domain containing 2 (2)	1.36606	0.871	0.6376	1.85467	0.818223	13.4809	0	0	0	0	0	0	0	0	0	0	0	NA	-19.16	0	0	0	0	0	0	0	0	0	0	0	0	0	0	0	0	0	0
NM_181656	284018	LOC284018 || hypothetical protein LOC284018 (2)	1.36409	0.937354	0.687166	1.87083	0.818223	13.5909	0	0	0	0	0	0	0	0	0	0	0	NA	NA	0	0	0	0	0	0	0	0	0	0	0	0	0	0	0	0	0	0
NM_025195	10221	TRIB1 || tribbles homolog 1 (Drosophila) (1)	1.36325	0.995217	0.730034	2.0756	0.818223	13.6379	1	0	0	0	0	0	0	0	0	0	0	NA	-21.38	0	1	0	0	0	0	0	0	0	1	0	0	0	0	0	0	0	0
NM_015685	27111	SDCBP2 || syndecan binding protein (syntenin) 2 (1)	1.36222	0.898417	0.659522	1.93536	0.818223	13.6952	1	0	0	0	0	0	0	0	0	0	0	NA	-16.49	0	0	0	0	0	0	0	0	0	1	0	0	0	0	0	0	0	0
NM_021930	60561	RINT-1 || Rad50-interacting protein 1 (1)	1.36179	0.92425	0.678703	1.98014	0.818223	13.7197	0	0	0	0	0	0	0	0	0	0	0	NA	NA	1	1	1	1	1	0	0	0	0	0	0	0	0	0	1	0	1	0
NA	204962	MGC34032 || hypothetical protein MGC34032 (1)	1.36002	0.961604	0.70705	2.08258	0.818223	13.8191	NA	NA	NA	NA	NA	0	0	0	0	0	0	NA	NA	NA	NA	NA	NA	NA	NA	NA	NA	NA	NA	NA	NA	NA	NA	NA	NA	NA	NA
NM_002106	3015	H2AFZ || H2A histone family, member Z (1)	1.35969	0.856049	0.629594	1.8464	0.818223	13.8381	1	0	0	0	0	0	0	0	0	0	0	NA	-18.3	0	0	0	0	0	1	0	0	0	1	0	0	0	0	0	0	0	0
NM_030927	81619	TSPAN14 || tetraspanin 14 (2)	1.35712	0.927917	0.68374	1.93995	0.818223	13.9832	1	2	1	0	0	0	0	0	0	0	1	-0.0633	-17.04	0	0	0	0	0	0	0	0	1	1	0	0	1	0	0	0	0	0
NA	84222	DKFZp434N035 || hypothetical protein DKFZp434N035 (2)	1.35525	1.11617	0.823584	2.13578	0.818223	14.0892	NA	NA	NA	NA	NA	0	0	0	0	0	0	NA	NA	NA	NA	NA	NA	NA	NA	NA	NA	NA	NA	NA	NA	NA	NA	NA	NA	NA	NA
NM_005982	6495	SIX1 || sine oculis homeobox homolog 1 (Drosophila) (1)	1.35423	1.20479	0.88965	2.34992	0.818223	14.1476	0	0	0	0	0	0	0	0	0	0	0	NA	NA	0	0	0	0	0	0	0	0	0	0	0	0	0	0	0	0	0	0
NM_012297	9908	G3BP2 || Ras-GTPase activating protein SH3 domain-binding protein 2 (3)	1.35165	0.877667	0.649328	1.87508	0.818223	14.2951	2	1	1	0	0	1	0	0	0	0	1	-0.1534	-22.59	0	0	0	0	0	0	0	0	0	2	0	0	1	0	0	0	0	0
NM_001039140	54976	C20orf27 || chromosome 20 open reading frame 27 (1)	1.35048	1.25348	0.928178	2.67801	0.818223	14.3627	2	1	0	0	0	0	0	0	0	0	0	NA	-19.74	1	1	1	0	0	0	0	0	1	2	0	0	0	0	0	0	1	0
NM_003010	6416	MAP2K4 || mitogen-activated protein kinase kinase 4 (1)	1.34962	0.836833	0.620052	1.78787	0.818223	14.4122	5	1	1	1	0	1	0	0	0	1	0	-0.3545	-21.12	1	1	1	1	1	0	0	0	1	5	1	1	1	1	1	1	1	1
NM_006815	10959	RNP24 || coated vesicle membrane protein (1)	1.34781	0.891875	0.661724	1.81742	0.818223	14.5168	0	0	0	0	0	0	0	0	0	0	0	NA	-16.35	0	0	0	0	0	0	0	0	0	0	0	0	0	0	0	0	0	0
NM_020462	57222	KIAA1181 || endoplasmic reticulum-golgi intermediate compartment 32 kDa protein (1)	1.34764	1.05704	0.784367	2.05255	0.818223	14.5266	1	1	0	1	0	0	0	0	0	0	1	-0.0743	-17.64	0	0	0	0	0	0	0	0	1	1	1	0	0	0	0	0	0	0
NM_005754	10146	G3BP || Ras-GTPase-activating protein SH3-domain-binding protein (4)	1.34717	0.9165	0.680315	1.87327	0.818223	14.5536	3	1	1	1	0	1	0	0	1	1	1	-0.3817	-20.21	0	0	0	0	0	0	0	0	1	3	1	0	1	1	0	0	0	0
NM_145309	220074	LRRC51 || leucine rich repeat containing 51 (2)	1.34666	0.832542	0.618228	1.74109	0.818223	14.5833	0	0	0	0	0	0	0	0	0	0	0	NA	NA	0	0	0	0	0	0	0	0	0	0	0	0	0	0	0	0	0	0
NM_014154	25852	ARMC8 || armadillo repeat containing 8 (12)	1.34583	0.9875	0.733747	2.17479	0.818223	14.6312	0	0	0	0	0	0	0	0	0	0	0	NA	NA	1	0	0	1	0	1	1	0	0	0	0	0	0	0	1	1	0	0
NM_004206	9117	SEC22L3 || SEC22 vesicle trafficking protein-like 3 (S. cerevisiae) (3)	1.34542	0.970708	0.721491	2.00538	0.818223	14.6551	0	0	0	0	0	0	0	0	0	0	0	NA	NA	0	0	0	0	0	0	0	0	0	0	0	0	0	0	0	0	0	0
NM_002868	5869	RAB5B || RAB5B, member RAS oncogene family (2)	1.34431	0.8675	0.645314	1.91317	0.818223	14.7198	6	1	1	0	0	0	0	0	0	0	1	-0.0948	-19.57	0	0	0	0	0	0	0	0	2	6	0	0	1	0	0	0	0	0
NM_007182	11186	RASSF1 || Ras association (RalGDS/AF-6) domain family 1 (2)	1.34338	0.903917	0.672868	1.84668	0.818223	14.774	1	1	1	1	1	0	0	0	0	0	1	-0.3776	-16.35	0	0	0	0	0	0	0	0	2	1	1	0	1	0	0	0	0	0
NM_001121	120	ADD3 || adducin 3 (gamma) (5)	1.34026	0.995333	0.742643	2.06655	0.818223	14.9568	0	0	0	0	0	0	0	0	0	0	0	NA	NA	2	2	0	1	0	0	0	0	0	0	0	0	0	0	1	0	0	0
NA	441481	na || similar to Glutathione peroxidase 1 (GSHPx-1) (Cellular glutathione peroxidase) (1)	1.33791	0.944542	0.705982	1.943	0.818223	15.0949	NA	NA	NA	NA	NA	0	0	0	0	0	0	NA	NA	NA	NA	NA	NA	NA	NA	NA	NA	NA	NA	NA	NA	NA	NA	NA	NA	NA	NA
NM_152312	120071	GYLTL1B || glycosyltransferase-like 1B (1)	1.33784	1.0685	0.798676	1.96232	0.818223	15.0992	0	0	0	0	0	0	0	0	0	0	0	NA	NA	3	2	1	0	0	0	0	0	0	0	0	0	0	0	0	0	1	0
NM_144582	113419	TEX261 || testis expressed sequence 261 (1)	1.33775	1.04871	0.783935	2.0039	0.818223	15.1045	4	3	1	1	0	1	0	1	0	1	0	-0.2366	-18.03	0	0	0	0	0	0	0	0	1	4	1	1	1	1	0	0	0	0
NM_004124	2764	GMFB || glia maturation factor, beta (2)	1.33763	0.71625	0.535461	1.64887	0.818223	15.1115	1	1	1	0	0	1	0	0	0	1	0	-0.206	NA	0	0	0	0	0	0	0	0	1	1	0	0	1	1	0	0	0	0
NM_018298	55283	MCOLN3 || mucolipin 3 (1)	1.33726	0.829333	0.620173	1.78404	0.818223	15.1334	0	0	0	0	0	0	0	0	0	0	0	NA	NA	2	1	1	0	0	0	0	0	0	0	0	0	0	0	0	0	1	0
NM_001039366	529	ATP6V1E1 || ATPase, H+ transporting, lysosomal 31kDa, V1 subunit E isoform 1 (4)	1.33717	1.15317	0.862394	2.20574	0.818223	15.1388	1	0	0	0	0	0	0	0	0	0	0	NA	-17.36	0	0	0	0	0	0	0	0	0	1	0	0	0	0	0	0	0	0
NM_004800	9375	TM9SF2 || transmembrane 9 superfamily member 2 (2)	1.33668	0.878667	0.657348	1.83551	0.818223	15.1675	1	0	0	0	0	0	0	0	0	0	0	NA	-18.65	0	1	0	0	0	0	0	0	0	1	0	0	0	0	0	0	0	0
NA	346990	na || similar to H2A histone family, member Z (1)	1.33625	0.951747	0.712253	2.07492	0.818223	15.1933	NA	NA	NA	NA	NA	0	0	0	0	0	0	NA	NA	NA	NA	NA	NA	NA	NA	NA	NA	NA	NA	NA	NA	NA	NA	NA	NA	NA	NA
NM_002162	3385	ICAM3 || intercellular adhesion molecule 3 (1)	1.33565	1.00021	0.748853	1.90196	0.818223	15.2285	0	0	0	0	0	0	0	0	0	0	0	NA	NA	0	0	0	0	0	NA	NA	NA	0	0	0	0	0	0	0	0	0	0
NM_052969	116832	RPL39L || ribosomal protein L39-like (1)	1.33537	1.05121	0.787203	2.07473	0.818223	15.2453	0	0	0	0	0	0	0	0	0	0	0	NA	NA	0	0	0	0	0	0	0	0	0	0	0	0	0	0	0	0	0	0
NM_015044	23062	GGA2 || golgi associated, gamma adaptin ear containing, ARF binding protein 2 (5)	1.33391	0.809417	0.606802	1.74463	0.818223	15.3323	3	3	2	1	1	1	0	1	0	1	0	-0.4169	-18.46	1	0	0	1	0	0	0	0	2	3	1	1	2	2	1	0	0	0
NM_004329	657	BMPR1A || bone morphogenetic protein receptor, type IA (3)	1.33196	0.847875	0.636563	1.80066	0.818223	15.4484	2	1	0	0	0	0	0	0	0	0	0	NA	-18.86	1	0	0	0	0	0	0	0	1	2	0	0	0	0	0	0	0	0
NA	162972	ZNF550 || zinc finger protein 550 (1)	1.33157	0.919792	0.690755	2.01098	0.818223	15.4714	NA	NA	NA	NA	NA	0	0	0	0	0	0	NA	NA	NA	NA	NA	NA	NA	NA	NA	NA	NA	NA	NA	NA	NA	NA	NA	NA	NA	NA
NM_025232	80346	C8orf20 || chromosome 8 open reading frame 20 (2)	1.32959	0.999542	0.751768	2.03105	0.818223	15.5903	1	0	0	0	0	0	0	0	0	0	0	NA	-16.49	0	0	0	0	0	0	0	0	0	1	0	0	0	0	0	0	0	0
NM_032227	84187	RP13-360B22.2 || hypothetical protein FLJ22679 (1)	1.32805	0.970004	0.7304	2.02618	0.818223	15.6831	0	0	0	0	0	0	0	0	0	0	0	NA	NA	1	1	0	0	0	0	0	0	0	0	0	0	0	0	0	0	0	0
NM_000099	1471	CST3 || cystatin C (amyloid angiopathy and cerebral hemorrhage) (1)	1.32724	1.1085	0.835189	2.2263	0.818223	15.7313	1	2	0	0	0	0	0	0	0	0	0	NA	-16.1	1	1	1	0	0	0	0	0	0	1	0	0	0	0	0	0	1	0
NM_000671	128	ADH5 || alcohol dehydrogenase 5 (class III), chi polypeptide (4)	1.32453	0.900229	0.67966	1.9165	0.818223	15.8955	1	1	1	0	0	0	0	0	0	0	1	-0.1809	-24.49	2	0	0	0	0	0	0	0	1	1	0	0	1	0	0	0	0	0
NM_001042440	831	CAST || calpastatin (4)	1.32429	1.12921	0.852692	2.50124	0.818223	15.9099	2	1	0	0	0	0	0	0	0	0	0	NA	-20.57	1	0	0	0	0	0	0	0	0	2	0	0	0	0	0	0	0	0
NM_016605	51307	FAM53C || family with sequence similarity 53, member C (2)	1.32422	0.780292	0.589248	1.76113	0.818223	15.9145	0	0	0	0	0	0	0	0	0	0	0	NA	-17.95	1	2	0	0	0	0	0	0	1	0	0	0	0	0	0	0	0	0
NM_006047	10137	RBM12 || RNA binding motif protein 12 (2)	1.32238	0.934837	0.706936	1.98632	0.818223	16.0261	3	1	1	1	0	1	0	0	0	1	1	-0.1259	-17.37	3	1	0	0	0	0	0	0	3	3	1	0	1	1	0	0	0	0
NM_001040006	10915	TCERG1 || transcription elongation regulator 1 (2)	1.32193	0.886708	0.670767	1.81676	0.818223	16.0532	0	0	0	0	0	0	0	0	0	0	0	NA	-21.26	0	0	0	0	0	NA	NA	NA	0	0	0	0	0	0	0	0	0	0
NA	391800	na || similar to U1 snRNP-specific protein C (1)	1.3209	0.944792	0.715265	1.96146	0.818223	16.1163	NA	NA	NA	NA	NA	0	0	0	0	0	0	NA	NA	NA	NA	NA	NA	NA	NA	NA	NA	NA	NA	NA	NA	NA	NA	NA	NA	NA	NA
NM_001100876	254295	PHYHD1 || phytanoyl-CoA dioxygenase domain containing 1 (2)	1.31988	0.832562	0.630784	1.74886	0.818223	16.1783	1	1	1	0	0	0	0	0	0	0	0	NA	-17.33	0	0	0	0	0	0	0	0	0	1	0	0	1	0	0	0	0	0
NM_013375	29777	ABT1 || activator of basal transcription 1 (1)	1.31767	0.8725	0.662152	1.80394	0.818223	16.3139	1	2	1	0	0	0	0	0	0	0	1	-0.2969	-19.13	0	0	0	0	0	NA	NA	NA	0	1	0	0	1	0	0	0	0	0
NM_138473	6667	SP1 || Sp1 transcription factor (1)	1.31757	0.96375	0.731463	2.12423	0.818223	16.3204	9	4	1	2	0	1	0	0	1	1	1	-0.2523	-20.51	1	1	1	0	0	0	0	0	3	9	2	1	1	1	0	0	1	1
NM_173638	284565	MGC8902 || hypothetical protein MGC8902 (2)	1.31699	0.711667	0.540374	1.65396	0.818223	16.3559	1	1	1	0	0	0	0	0	0	0	1	-0.2912	-21.58	1	1	1	0	0	0	0	0	1	1	0	0	1	0	0	0	1	0
NM_001011537	84248	FYTTD1 || forty-two-three domain containing 1 (1)	1.31636	0.910833	0.691934	1.99969	0.818223	16.3946	2	0	0	0	0	0	0	0	0	0	0	NA	-20.16	0	0	0	0	0	0	0	0	0	2	0	0	0	0	0	0	0	0
NM_001008895	8451	CUL4A || cullin 4A (2)	1.31617	0.93491	0.710328	2.05545	0.818223	16.4065	0	0	0	0	0	0	0	0	0	0	0	NA	NA	0	1	0	0	0	NA	NA	NA	1	0	0	0	0	0	0	0	0	0
NM_032828	84914	ZNF587 || zinc finger protein 587 (1)	1.31616	0.827083	0.628407	1.7584	0.818223	16.407	0	2	0	0	0	0	0	0	0	0	0	NA	NA	0	0	0	0	0	0	0	0	2	0	0	0	0	0	0	0	0	0
NM_019102	3202	HOXA5 || homeo box A5 (1)	1.31608	0.790958	0.600995	1.7385	0.818223	16.4117	0	0	0	0	0	0	0	0	0	0	0	NA	NA	0	0	0	0	0	0	0	0	0	0	0	0	0	0	0	0	0	0
NM_014947	22887	FOXJ3 || forkhead box J3 (1)	1.31504	0.835625	0.635435	1.85382	0.818223	16.4758	1	0	0	0	0	0	0	0	0	0	0	NA	-22.08	1	3	0	0	0	0	0	0	1	1	0	0	0	0	0	0	0	0
NM_005720	10095	ARPC1B || actin related protein 2/3 complex, subunit 1B, 41kDa (2)	1.31049	1.07471	0.820083	2.00362	0.818223	16.7583	2	1	1	0	0	0	0	0	1	0	1	-0.2767	-24.64	0	0	0	0	0	0	0	0	0	2	0	0	1	0	0	0	0	0
NM_145058	196383	MGC7036 || hypothetical protein MGC7036 (1)	1.30876	1.25567	0.959432	2.46049	0.818223	16.866	1	0	0	0	0	0	0	0	0	0	0	NA	-17.42	0	0	0	0	0	0	0	0	0	1	0	0	0	0	0	0	0	0
NM_018638	55500	ETNK1 || ethanolamine kinase 1 (1)	1.30783	0.81725	0.624892	1.79896	0.818223	16.9244	3	0	0	1	0	0	0	0	0	1	0	-0.0009	-19.31	0	1	0	0	0	NA	NA	NA	1	3	1	1	0	0	0	0	0	0
NM_016205	56034	PDGFC || platelet derived growth factor C (1)	1.30649	0.798125	0.610891	1.73246	0.818223	17.008	1	1	0	0	0	0	0	0	0	0	0	NA	-16.46	1	1	0	0	0	0	0	0	1	1	0	0	0	0	0	0	0	0
NM_016082	51654	CDK5RAP1 || CDK5 regulatory subunit associated protein 1 (2)	1.30642	0.807369	0.617999	1.74157	0.818223	17.0123	0	0	0	0	0	0	0	0	0	0	0	NA	NA	1	1	0	0	0	0	1	0	0	0	0	0	0	0	0	0	0	0
NM_018184	55207	ARL10C || ADP-ribosylation factor-like 10C (1)	1.30632	0.710625	0.543989	1.64475	0.818223	17.0186	1	1	0	0	0	0	0	0	0	0	0	NA	-23.75	1	0	0	0	0	0	0	0	1	1	0	0	0	0	0	0	0	0
NM_003372	7411	VBP1 || von Hippel-Lindau binding protein 1 (2)	1.3052	0.905833	0.694018	1.85015	0.818223	17.089	1	0	0	0	0	0	0	0	0	0	0	NA	-20.24	0	0	0	0	0	0	0	0	0	1	0	0	0	0	NA	NA	NA	NA
NM_177967	337867	PHGDHL1 || phosphoglycerate dehydrogenase like 1 (1)	1.30177	0.995313	0.764585	1.99789	0.818223	17.3057	0	0	0	0	0	0	0	0	0	0	0	NA	NA	0	0	0	0	0	0	0	0	0	0	0	0	0	0	0	0	0	0
NM_175069	54840	APTX || aprataxin (3)	1.30055	0.804204	0.618359	1.78274	0.818223	17.3832	1	0	0	0	0	0	0	0	0	0	0	NA	-17.23	1	0	0	1	0	NA	NA	NA	0	1	0	0	0	0	1	1	0	0
NM_018126	55161	TMEM33 || transmembrane protein 33 (2)	1.2988	0.803229	0.618442	1.82446	0.818223	17.4944	1	1	0	0	0	0	0	0	0	0	0	NA	-18.71	1	0	0	0	0	0	0	0	0	1	0	0	0	0	0	0	0	0
NA	149603	LOC149603 || hypothetical protein LOC149603 (1)	1.29871	0.899958	0.692962	1.86396	0.818223	17.4997	NA	NA	NA	NA	NA	0	0	0	0	0	0	NA	NA	NA	NA	NA	NA	NA	NA	NA	NA	NA	NA	NA	NA	NA	NA	NA	NA	NA	NA
NM_194317	130574	MGC52057 || hypothetical protein MGC52057 (1)	1.29806	0.903492	0.696032	1.97364	0.818223	17.5412	0	2	0	0	0	0	0	0	0	0	0	NA	NA	0	0	0	0	0	0	0	0	1	0	0	0	0	0	0	0	0	0
NM_005646	6894	TARBP1 || TAR (HIV) RNA binding protein 1 (1)	1.29621	0.979458	0.755635	1.95746	0.818223	17.6596	2	2	2	1	1	0	0	0	1	0	1	NA	-20.9	1	1	0	0	0	NA	NA	NA	1	2	1	0	2	0	0	0	0	0
NM_004674	9070	ASH2L || ash2 (absent, small, or homeotic)-like (Drosophila) (1)	1.29616	0.892083	0.688249	1.92385	0.818223	17.6623	1	0	0	0	0	0	0	0	0	0	0	NA	-16.84	1	2	1	1	1	0	0	NA	0	1	0	0	0	0	1	1	1	1
NM_001034191	27068	PPA2 || inorganic pyrophosphatase 2 (3)	1.29603	0.931542	0.718765	1.88909	0.818223	17.6707	0	0	0	0	0	0	0	0	0	0	0	NA	NA	0	1	0	0	0	NA	NA	NA	0	0	0	0	0	0	0	0	0	0
NA	343515	na || similar to ATPase, H+ transporting, lysosomal 31kD, V1 subunit E isoform 1; V-ATPase, subunit E; H(+)-transporting two-sector ATPase, 31kDa subunit; H+-transporting ATP synthase chain E, vacuolar; vacuolar proton pump, 31-kd subunit; ATPase, H+ tra... (1)	1.29595	0.98025	0.756394	2.0033	0.818223	17.6759	NA	NA	NA	NA	NA	0	0	0	0	0	0	NA	NA	NA	NA	NA	NA	NA	NA	NA	NA	NA	NA	NA	NA	NA	NA	NA	NA	NA	NA
NM_005382	4741	NEF3 || neurofilament 3 (150kDa medium) (2)	1.29579	1.37567	1.06164	3.08275	0.818223	17.6862	0	0	0	0	0	0	0	0	0	0	0	NA	NA	0	0	0	0	0	NA	NA	NA	1	0	0	0	0	0	0	0	0	0
NM_025201	80301	pp9099 || PH domain-containing protein (1)	1.29554	1.22432	0.945022	2.2961	0.818223	17.702	2	1	0	1	0	0	0	0	0	0	1	0.0305	-19.03	0	0	0	0	0	0	0	0	1	2	1	0	0	0	0	0	0	0
NM_001040633	51422	PRKAG2 || protein kinase, AMP-activated, gamma 2 non-catalytic subunit (1)	1.2946	0.958908	0.740701	2.03279	0.818223	17.7628	1	1	1	1	1	0	0	0	0	1	0	-0.3554	-19.33	2	0	0	0	0	1	0	0	1	1	1	1	1	1	0	0	0	0
NM_152464	147007	C17orf32 || chromosome 17 open reading frame 32 (1)	1.29415	0.90625	0.700266	1.94575	0.818223	17.7913	2	0	0	0	0	0	0	0	0	0	0	NA	-17.59	1	0	0	0	0	NA	NA	NA	0	2	0	0	0	0	0	0	0	0
NM_024551	79602	ADIPOR2 || adiponectin receptor 2 (1)	1.29175	0.862333	0.667568	1.89419	0.818223	17.9455	2	1	0	1	0	1	1	0	0	1	0	-0.0039	-16.65	2	1	0	0	0	0	0	0	1	2	1	1	0	0	0	0	0	0
NM_018053	55113	FLJ10307 || hypothetical protein FLJ10307 (2)	1.29151	0.868292	0.672309	1.8958	0.818223	17.9614	1	1	0	1	0	0	0	0	0	0	1	-0.0609	NA	0	0	0	0	0	0	0	0	1	1	1	0	0	0	0	0	0	0
NM_006427	10572	SIVA || CD27-binding (Siva) protein (2)	1.29002	0.984146	0.762893	2.17191	0.818223	18.0576	2	1	1	0	0	0	0	0	0	0	1	-0.1572	-17	0	0	0	0	0	0	0	0	0	2	0	0	1	0	0	0	0	0
NM_001017369	6307	SC4MOL || sterol-C4-methyl oxidase-like (1)	1.28918	0.776954	0.602675	1.69717	0.818223	18.1121	0	0	0	0	0	0	0	0	0	0	0	NA	NA	0	0	0	0	0	1	0	0	1	0	0	0	0	0	0	0	0	0
NM_015975	51616	TAF9L || TAF9-like RNA polymerase II, TATA box binding protein (TBP)-associated factor, 31kDa (2)	1.28743	0.864208	0.671267	1.87879	0.818223	18.2254	1	0	0	0	0	0	0	0	0	0	0	NA	-16.78	1	0	0	0	0	0	0	0	0	1	0	0	0	0	0	0	0	0
NM_001014794	3611	ILK || integrin-linked kinase (2)	1.28694	0.918375	0.713613	2.00586	0.818223	18.2574	0	0	0	0	0	0	0	0	0	0	0	NA	NA	0	2	0	0	0	0	0	0	0	0	0	0	0	0	0	0	0	0
NM_022831	64853	C1orf80 || chromosome 1 open reading frame 80 (2)	1.28664	1.01465	0.7886	1.91308	0.818223	18.2766	2	1	1	1	0	0	0	0	0	0	1	-0.2637	-23.02	0	0	0	0	0	0	0	0	1	2	1	0	1	0	0	0	0	0
NM_003580	8439	NSMAF || neutral sphingomyelinase (N-SMase) activation associated factor (1)	1.28655	0.851075	0.661516	1.85642	0.818223	18.2825	1	1	1	0	0	1	0	0	0	1	0	NA	NA	1	1	0	0	0	0	0	0	0	1	0	0	1	0	0	0	0	0
NM_001025579	81565	NDEL1 || nudE nuclear distribution gene E homolog like 1 (A. nidulans) (1)	1.28461	0.798375	0.621493	1.82613	0.818223	18.4092	0	2	0	0	0	0	0	0	0	0	0	NA	NA	0	0	0	0	0	0	0	0	0	0	0	0	0	0	0	0	0	0
NA	114043	C21orf90 || chromosome 21 open reading frame 90 (2)	1.28432	0.952542	0.74167	1.91432	0.818223	18.4279	NA	NA	NA	NA	NA	0	0	0	0	0	0	NA	NA	NA	NA	NA	NA	NA	NA	NA	NA	NA	NA	NA	NA	NA	NA	NA	NA	NA	NA
NM_003633	8507	ENC1 || ectodermal-neural cortex (with BTB-like domain) (1)	1.28232	1.23892	0.966151	3.37318	0.818223	18.5588	0	0	0	0	0	0	0	0	0	0	0	NA	NA	1	0	0	0	0	0	0	0	0	0	0	0	0	0	0	0	0	0
NM_000177	2934	GSN || gelsolin (amyloidosis, Finnish type) (11)	1.28132	0.886792	0.692091	1.88846	0.818223	18.6244	1	1	1	0	0	0	0	0	1	0	1	-0.2125	-16.61	1	0	0	0	0	0	0	0	1	1	0	0	1	0	0	0	0	0
NM_001001419	4090	SMAD5 || SMAD, mothers against DPP homolog 5 (Drosophila) (2)	1.28084	0.845583	0.660178	1.85521	0.818223	18.656	3	4	3	0	0	0	0	0	0	1	1	-0.5582	-20.25	0	1	0	0	0	0	0	0	1	3	0	0	3	1	0	0	0	0
NM_012095	26985	AP3M1 || adaptor-related protein complex 3, mu 1 subunit (2)	1.28078	0.663542	0.518077	1.57589	0.818223	18.6601	2	1	0	1	0	1	1	1	0	1	0	-0.1145	-20.09	0	0	0	0	0	0	0	0	1	2	1	1	0	0	0	0	0	0
NM_005254	2553	GABPB2 || GA binding protein transcription factor, beta subunit 2 (1)	1.28077	0.705667	0.550971	1.64084	0.818223	18.6607	1	1	1	0	0	1	0	0	0	1	0	-0.1745	NA	1	0	0	1	0	1	0	0	0	1	0	0	1	1	1	1	0	0
NM_002886	5912	RAP2B || RAP2B, member of RAS oncogene family (2)	1.27935	0.843292	0.659154	1.79756	0.818223	18.7539	4	2	1	2	0	0	0	1	0	0	1	-0.1876	-18.71	0	0	0	0	0	0	0	0	2	4	2	0	1	0	0	0	0	0
NM_198552	375061	MGC15887 || hypothetical gene supported by BC009447 (2)	1.279	0.736917	0.576165	1.65964	0.818223	18.7771	0	0	0	0	0	0	0	0	0	0	0	NA	NA	0	0	0	0	0	NA	NA	NA	1	0	0	0	0	0	0	0	0	0
NM_005803	10211	FLOT1 || flotillin 1 (3)	1.27895	1.07696	0.842063	2.3593	0.818223	18.7805	1	1	1	0	0	1	0	0	0	1	0	-0.2167	NA	0	0	0	0	0	0	0	0	0	1	0	0	1	1	0	0	0	0
NM_032758	84844	PHF5A || PHD finger protein 5A (1)	1.27874	0.845563	0.661248	1.79223	0.818223	18.7945	0	1	0	0	0	0	0	0	0	0	0	NA	NA	0	0	0	0	0	0	0	0	0	0	0	0	0	0	0	0	0	0
NM_000848	2946	GSTM2 || glutathione S-transferase M2 (muscle) (1)	1.27839	1.12994	0.883877	2.01971	0.818223	18.8176	1	0	0	1	0	0	0	0	0	0	1	0.0072	-16.42	1	0	0	0	0	NA	NA	NA	1	1	1	0	0	0	0	0	0	0
NM_002898	5939	RBMS2 || RNA binding motif, single stranded interacting protein 2 (3)	1.27807	0.821521	0.642782	1.87023	0.818223	18.8385	1	0	0	0	0	0	0	0	0	0	0	NA	-22.07	1	1	1	0	0	0	0	0	0	1	0	0	0	0	0	0	1	0
NM_001024934	8936	WASF1 || WAS protein family, member 1 (1)	1.2776	1.13771	0.890508	2.01561	0.818223	18.87	2	0	0	1	0	1	0	0	0	1	0	-0.1215	-18.76	2	0	0	0	0	0	0	0	2	2	1	1	0	0	0	0	0	0
NM_004779	9337	CNOT8 || CCR4-NOT transcription complex, subunit 8 (1)	1.27722	0.870648	0.681673	1.76853	0.818223	18.8947	0	0	0	0	0	0	0	0	0	0	0	NA	-17.31	0	0	0	0	0	0	0	0	0	0	0	0	0	0	0	0	0	0
NM_170750	5716	PSMD10 || proteasome (prosome, macropain) 26S subunit, non-ATPase, 10 (3)	1.27699	0.852875	0.66788	1.84023	0.818223	18.9102	0	0	0	0	0	0	0	0	0	0	0	NA	NA	0	0	0	0	0	0	0	0	0	0	0	0	0	0	0	0	0	0
NM_015999	51094	ADIPOR1 || adiponectin receptor 1 (1)	1.2763	0.911325	0.714038	2.02711	0.818223	18.956	0	0	0	0	0	0	0	0	0	0	0	NA	-17.56	0	0	0	0	0	0	0	0	0	0	0	0	0	0	0	0	0	0
NA	283131	TncRNA || trophoblast-derived noncoding RNA (1)	1.27328	1.35267	1.06235	2.30861	0.818223	19.1562	NA	NA	NA	NA	NA	0	0	0	0	0	0	NA	NA	NA	NA	NA	NA	NA	NA	NA	NA	NA	NA	NA	NA	NA	NA	NA	NA	NA	NA
NM_007282	11342	RNF13 || ring finger protein 13 (2)	1.27321	0.904292	0.710246	1.9418	0.818223	19.1611	0	0	0	0	0	0	0	0	0	0	0	NA	NA	0	1	0	0	0	1	1	1	0	0	0	0	0	0	0	0	0	0
NM_017546	55571	C2orf29 || chromosome 2 open reading frame 29 (2)	1.27239	0.816083	0.641377	1.8417	0.818223	19.2156	1	1	1	0	0	1	0	0	0	1	0	-0.2391	-17.59	0	0	0	0	0	NA	NA	NA	0	1	0	0	1	1	0	0	0	0
NA	4540	MT-ND5 || mitochondrially encoded NADH dehydrogenase 5 (1)	1.27146	0.949792	0.747011	1.87369	0.818223	19.2781	NA	NA	NA	NA	NA	0	0	0	0	0	0	NA	NA	NA	NA	NA	NA	NA	NA	NA	NA	NA	NA	NA	NA	NA	NA	NA	NA	NA	NA
NM_016178	51686	OAZ3 || ornithine decarboxylase antizyme 3 (1)	1.26738	0.79856	0.630089	1.73492	1.39896	19.5518	0	0	0	0	0	0	0	0	0	0	0	NA	NA	0	0	0	0	0	1	0	0	0	0	0	0	0	0	0	0	0	0
NM_016108	51390	AIG1 || androgen-induced 1 (1)	1.2673	0.904554	0.713765	2.01439	1.39896	19.557	0	0	0	0	0	0	0	0	0	0	0	NA	NA	0	0	0	0	0	NA	NA	NA	0	0	0	0	0	0	0	0	0	0
NM_024959	80024	SLC24A6 || solute carrier family 24 (sodium/potassium/calcium exchanger), member 6 (1)	1.26675	0.913333	0.721003	1.7878	1.39896	19.5938	2	3	1	1	0	0	0	0	0	0	1	-0.169	-17.05	1	0	0	0	0	0	0	0	2	2	1	0	1	0	0	0	0	0
NM_001100626	10613	SPFH1 || SPFH domain family, member 1 (1)	1.26671	0.856917	0.676488	1.93841	1.39896	19.5965	0	1	0	0	0	0	0	0	0	0	0	NA	-17.5	2	1	1	0	0	0	0	0	1	0	0	0	0	0	0	0	1	1
NM_015986	51379	CRLF3 || cytokine receptor-like factor 3 (1)	1.26606	0.978108	0.77256	2.13962	1.39896	19.6405	0	0	0	0	0	0	0	0	0	0	0	NA	NA	1	2	1	0	0	0	0	0	0	0	0	0	0	0	0	0	1	0
NM_004661	8697	CDC23 || CDC23 (cell division cycle 23, yeast, homolog) (1)	1.26549	0.835708	0.660381	1.73217	1.39896	19.6787	1	0	0	0	0	0	0	0	0	0	0	NA	-16.85	2	2	0	0	0	NA	NA	NA	1	1	0	0	0	0	0	0	0	0
NM_001078171	8933	CXX1 || CAAX box 1 (1)	1.26495	0.981875	0.776219	1.86989	1.39896	19.7157	2	1	1	0	0	0	0	0	0	0	1	-0.2567	-22.26	0	0	0	0	0	0	0	0	0	2	0	0	1	0	0	0	0	0
NM_003452	7743	ZNF189 || zinc finger protein 189 (1)	1.26403	1.05636	0.835704	2.63156	1.39896	19.7774	1	1	1	0	0	1	0	0	0	1	0	-0.2148	-18.32	0	0	0	0	0	0	0	0	0	1	0	0	1	1	0	0	0	0
NM_017998	55071	C9orf40 || chromosome 9 open reading frame 40 (1)	1.26193	0.802875	0.63623	1.7811	1.39896	19.9204	0	1	0	0	0	0	0	0	0	0	0	NA	NA	1	1	1	0	0	0	0	0	0	0	0	0	0	0	0	0	1	1
NM_015560	4976	OPA1 || optic atrophy 1 (autosomal dominant) (2)	1.26007	1.38635	1.10022	4.32201	1.39896	20.0468	2	0	0	0	0	0	0	0	0	0	0	NA	-22.43	0	1	0	0	0	0	0	0	1	2	0	0	0	0	0	0	0	0
NM_020679	57409	AD023 || AD023 protein (2)	1.25995	1.05296	0.835715	2.26914	1.39896	20.0549	0	1	0	0	0	0	0	0	0	0	0	NA	-17.57	1	0	0	0	0	0	0	0	0	0	0	0	0	0	0	0	0	0
NM_004344	1069	CETN2 || centrin, EF-hand protein, 2 (1)	1.25871	0.886733	0.704478	1.87221	1.39896	20.1395	1	1	0	0	0	0	0	0	0	0	0	NA	-17.31	0	0	0	0	0	NA	NA	NA	0	1	0	0	0	0	0	0	0	0
NM_001075098	4337	MOCS1 || molybdenum cofactor synthesis 1 (1)	1.25825	1.01193	0.804236	2.12138	1.39896	20.1711	2	1	1	1	1	0	0	0	0	0	0	NA	-19.22	0	1	0	0	0	0	0	0	1	2	1	1	1	1	0	0	0	0
NM_004428	1942	EFNA1 || ephrin-A1 (1)	1.25764	0.754625	0.600033	1.69464	1.39896	20.2127	1	0	0	0	0	0	0	0	0	0	0	NA	-16.67	0	0	0	0	0	0	0	0	1	1	0	0	0	0	0	0	0	0
NM_001012978	340542	NGFRAP1L1 || NGFRAP1-like 1 (1)	1.25622	1.05175	0.837237	2.28638	1.39896	20.3102	0	0	0	0	0	0	0	0	0	0	0	NA	NA	2	0	0	1	0	0	0	0	0	0	0	0	0	0	1	0	0	0
NM_016146	51399	TRAPPC4 || trafficking protein particle complex 4 (2)	1.2554	0.980833	0.78129	2.05419	1.39896	20.366	0	0	0	0	0	0	0	0	0	0	0	NA	NA	0	0	0	0	0	0	0	0	1	0	0	0	0	0	0	0	0	0
NM_005370	4218	RAB8A || RAB8A, member RAS oncogene family (2)	1.25452	0.729542	0.581532	1.64928	1.39896	20.4268	0	1	0	0	0	0	0	0	0	0	0	NA	NA	0	0	0	0	0	0	0	0	1	0	0	0	0	0	0	0	0	0
NM_023940	65997	RASL11B || RAS-like, family 11, member B (1)	1.25245	0.952042	0.760141	2.19885	1.39896	20.5691	1	1	0	0	0	0	0	0	0	0	0	NA	-19.18	0	0	0	0	0	0	0	0	0	1	0	0	0	0	0	0	0	0
NM_000346	6662	SOX9 || SRY (sex determining region Y)-box 9 (campomelic dysplasia, autosomal sex-reversal) (1)	1.25219	0.919	0.733914	2.14748	1.39896	20.5873	4	1	0	2	0	1	0	0	0	1	1	-0.1334	-25.96	0	0	0	0	0	0	0	0	4	4	2	1	0	0	0	0	0	0
NM_032814	84900	FLJ14627 || hypothetical protein FLJ14627 (1)	1.25175	0.972333	0.776777	1.9119	1.39896	20.6175	0	0	0	0	0	0	0	0	0	0	0	NA	-16.48	0	1	0	0	0	0	0	0	0	0	0	0	0	0	0	0	0	0
NM_017755	54888	NSUN2 || NOL1/NOP2/Sun domain family, member 2 (2)	1.25052	1.0064	0.804783	2.26586	1.39896	20.7025	1	1	1	0	0	1	0	0	0	1	0	-0.3286	NA	1	0	0	1	0	0	0	0	0	1	0	0	1	1	0	0	0	0
NM_001025778	51231	VRK3 || vaccinia related kinase 3 (1)	1.25024	0.705233	0.564077	1.62217	1.39896	20.722	0	0	0	0	0	0	0	0	0	0	0	NA	-18.73	1	0	0	0	0	0	0	0	0	0	0	0	0	0	0	0	0	0
NM_018347	55317	C20orf29 || chromosome 20 open reading frame 29 (2)	1.2494	1.18558	0.948924	2.35141	1.39896	20.7806	0	1	0	0	0	0	0	0	0	0	0	NA	NA	0	0	0	0	0	1	1	1	0	0	0	0	0	0	0	0	0	0
NM_002593	5118	PCOLCE || procollagen C-endopeptidase enhancer (1)	1.2492	0.98225	0.786301	2.00965	1.39896	20.794	0	0	0	0	0	0	0	0	0	0	0	NA	NA	3	2	1	0	0	0	0	0	0	0	0	0	0	0	0	0	1	0
NM_018120	55156	ARMC1 || armadillo repeat containing 1 (1)	1.24857	1.23725	0.990934	2.64379	1.39896	20.8381	1	1	1	0	0	1	0	0	0	1	0	-0.2914	NA	0	0	0	0	0	0	0	0	2	1	0	0	1	1	0	0	0	0
NM_005431	7516	XRCC2 || X-ray repair complementing defective repair in Chinese hamster cells 2 (3)	1.24843	0.817833	0.65509	1.71057	1.39896	20.8478	0	2	0	0	0	0	0	0	0	0	0	NA	NA	2	1	1	0	0	0	0	0	1	0	0	0	0	0	0	0	1	0
NM_144724	153562	MARVELD2 || MARVEL domain containing 2 (1)	1.24699	0.901121	0.722639	2.02233	1.39896	20.9483	1	0	0	1	0	0	0	0	0	0	1	-0.1528	NA	1	0	0	0	0	0	0	0	1	1	1	0	0	0	0	0	0	0
NM_015036	23052	KIAA0830 || KIAA0830 protein (2)	1.24664	1.11038	0.890698	2.32775	1.39896	20.9721	2	2	1	0	0	0	0	0	0	1	0	-0.2465	-18.73	1	0	0	0	0	0	0	0	0	2	0	0	1	1	0	0	0	0
NM_001083588	1875	E2F5 || E2F transcription factor 5, p130-binding (1)	1.24659	1.04004	0.834309	2.13938	1.39896	20.9758	1	1	1	0	0	1	0	0	0	1	0	-0.2618	NA	0	0	0	0	0	NA	NA	NA	0	1	0	0	1	1	0	0	0	0
NM_001609	36	ACADSB || acyl-Coenzyme A dehydrogenase, short/branched chain (2)	1.24575	0.958142	0.769129	2.07431	1.39896	21.0345	2	2	1	0	0	0	0	0	0	0	1	-0.1942	-18.07	1	0	0	0	0	0	0	0	0	2	0	0	1	0	0	0	0	0
NM_032717	84803	MGC11324 || hypothetical protein MGC11324 (1)	1.2456	0.880208	0.706653	1.85856	1.39896	21.0448	0	0	0	0	0	0	0	0	0	0	0	NA	-16.74	0	0	0	0	0	0	0	0	2	0	0	0	0	0	0	0	0	0
NM_004927	740	MRPL49 || mitochondrial ribosomal protein L49 (2)	1.24513	0.994375	0.798613	2.16003	1.39896	21.0778	1	2	0	1	0	0	0	0	0	0	1	-0.1134	-17.33	1	0	0	1	0	0	0	0	1	1	1	0	0	0	1	0	0	0
NM_005126	9975	NR1D2 || nuclear receptor subfamily 1, group D, member 2 (1)	1.24207	2.19617	1.76815	22.0882	1.39896	21.2918	3	0	0	1	0	0	0	1	0	0	1	-0.131	-17.78	0	1	0	0	0	0	0	0	1	3	1	0	0	0	0	0	0	0
[truncated: 7,999 more rows]

## Sheet: Ago2miR124_vs_Ago2_EXP_SAM_in
entrez_id	description	mock Expression (#1)|| gene expression BATCH GROUP 4	mock Expression (#2)|| gene expression BATCH GROUP 4	mock Expression (#3)|| gene expression BATCH GROUP 4	Ago2 Expression (#1)|| gene expression BATCH GROUP 4	Ago2 Expression (#2)|| gene expression BATCH GROUP 4	Ago2 Expression (#3)|| gene expression BATCH GROUP 4	Ago2 Expression (#4)|| gene expression BATCH GROUP 5	Ago2 Expression (#5)|| gene expression BATCH GROUP 5	Ago2 Expression (#6)|| gene expression BATCH GROUP 5	Ago2 Expression (#7)|| gene expression BATCH GROUP 5	Ago2 + miR-124 Expression (#1)|| gene expression BATCH GROUP 5	Ago2 + miR-124 Expression (#2)|| gene expression BATCH GROUP 5
[truncated: 13,243 more rows]

[truncated: 1 more sheets: Ago2miR124_vs_Ago2_EXP_SAM_out]
